# Supplementary material for: Single-cell resolution transcriptome atlases of soybean root organs reveal new regulatory programs controlling the nodulation process
Source: Research Square preprint supplement (doi:10.21203/rs.3.rs-2833917/v1), 2023-05-18
Supplement: Supplementary file 1 [file 088a870ae6560505bb3facb6.xlsx]

## Sheet: Table.S7
Table S7. Gene expression of soybean GmFWL3 binding partners across the nodule and root cell clusters. Cluster F, G, H-specific genes are highlighted in blue characters (i.e., > 4-fold changes between the expression levels in the most highly expressed F, G, and H cluster vs. the most highly expressed cluster in the remaining nodule clusters and the root clusters). Color codes to the left of the T…
		GmFWL3 binding partners			Putative subcellular localization of GmFWL3 partners using BUSCA			Nodule gene expression (transcripts per 10,000)											Root gene expression (transcripts per 10,000)
Colors	Functional categories	Function cagitories	Molecular Weight	Interacts with GmFWL1	Sub cellular location	SCORE	Gene ID	ClusterA	ClusterB	ClusterC	ClusterD	ClusterE	ClusterF	ClusterG	ClusterH	ClusterI	ClusterJ	ClusterK	Cluster1	Cluster2	Cluster3	Cluster4	Cluster5	Cluster6	Cluster7	Cluster8	Cluster9	Cluster10	Cluster11	Cluster12	Cluster13	Cluster14	Cluster15	Cluster16
Bold italics text	Repeatedly identified FWL3 partners	FWL1, PLAC8 family protein	17 kDa	Yes	Nucleus	1	GLYMA_09G187000	1.39999	0.694121	1.3346	0	2.40635	5.12224	5.26688	27.1239	1.48628	2.57985	0.965058	0	0	0	0	0	0	0	0	0	0	0	0	0	0	0	0
Blue Text	Nodule cluster F-G or H-specific genes	FWL3, PLANT CADMIUM RESISTANCE 2	19 kDa	Yes	Extracellular Space/Nucleus	0.56/0.44	GLYMA_08G043500	0.545132	0.0120937	0.410851	0	0.644177	12.112	14.4704	12.0122	0.590085	1.14538	0.0846818	0	0	0	0	0	0	0	0	0	0	0	0	0	0	0	0
	Proteasome related	PLAC8 family protein	29 kDa	No	Nucleus	1	GLYMA_05G209900	0.276043	0.229988	0.783512	0.70028	0.345564	26.4115	21.8654	1.72506	0.31752	1.99048	1.64728	0.395916	0.385782	0.759824	0.282885	0.577976	0.496637	0.219655	0.436397	0.228861	0.221386	1.04343	0.578358	0.222398	0.480872	0.129783	0.368982
	Vacuolar ATPase	SPFH/Band 7/PHB domain/Prohibitin/Flot-protein	31 kDa	Yes	Nucleus	1	GLYMA_05G029800	0.367666	0.0454599	0.242546	0.666001	0.409647	11.4777	11.8066	6.48076	0.1596	0.489195	0.0207262	0.0662913	0.289599	0.0184683	0.086942	0.0580558	0.0332688	0.0284946	0.175591	0.0558035	0.0233213	0	0.0807665	0.0121708	0.180575	0	0.0442796
	FWL/PLAC8 proteins	SPFH/Band 7/PHB domain/Prohibitin/Flot-protein	53 kDa	Yes	Nucleus	1	GLYMA_06G065600	0.505353	0.0874034	0.671715	0.770535	0.628278	6.32131	6.93534	6.56089	0.620692	0.685357	0.0332518	0.0662916	0.123908	0	1.08063	0	0	0.0150521	0	0	0.195191	0.217392	0.637913	0.581769	0.189626	0.999243	1.74648
	Aquaporin	Remorin family protein	22 kDa	No	Nucleus	1	GLYMA_08G012800	0.613706	0.132071	0.295904	0	0.876391	8.79759	18.2843	10.2643	0.572423	0.884305	0.230825	0	0	0	0	0	0	0	0	0	0	0	0	0	0	0	0
	H+ATPase/ATPase/GTPase	CASP-like, sulfur binding	26 kDa	No	Endomembrane System	0.94	GLYMA_03G042800	1.09092	0.0943166	0	1.39441	0.652151	27.0708	25.0384	5.75757	0.794112	1.11151	0.112199	0	0	0	0	0	0	0	0	0	0	0	0	0	0	0	0
	Prohibitin/Flotillin/Remorin	Sulfate transporter 3;5	40 kDa	No	Plasma Membrane	0.76	GLYMA_07G088200	0.195215	0.255559	0	0	0.536797	5.09672	4.51435	0.728225	0	0.366034	0.167008	0.888989	0.053548	0	0	0.0563214	0.110327	0.0317583	0.0691481	0.169729	0.150149	0.185304	0.155667	0.101923	0.18955	0.327609	0.113174
	Metal ion binding	Vesicle-associated membrane protein/SNARE activity	25 kDa	No	Endomembrane System	0.97	GLYMA_09G019800	0.292875	0.192526	0.133369	0.460087	0.393343	0.473417	0.330107	6.77451	1.10767	0.499197	0.376508	0.270569	0.275029	0.347493	0.181484	0.260194	0.320909	0.344293	0.241811	0.241992	0.994867	0.799733	1.12171	1.01324	0.417292	0.886142	0.506033
	Ribosomal protein	Receptor-like kinase 1	70 kDa	Yes	Plasma Membrane	0.93	GLYMA_14G214700	0.0509884	0.0741	0.300182	0.450086	0.087712	1.72103	2.71949	0.235141	0	0.14793	0.217286	0.0140291	0.0213306	0.191311	0	0.0377917	0.0095743	0.00594543	0.0262281	0.0148408	0.394364	0.73037	0.317101	0.277079	0.147484	0.156272	0.0446875
	Receptor/Protein Kinase	Aldolase-type TIM barrel family protein	40 kDa	No	Cytoplasm	0.7	GLYMA_08G097300	1.53821	61.3695	6.81819	6.24946	1.70271	0	0	1.6219	4.40659	112.104	169.157	0.14987	0.122221	0.269829	0.211485	0.0753892	0.0401206	0	0.121876	0.00857385	0.012879	0	0	0.014122	0	0	0.43148
	Transporter activity	CASP-like, sulfur binding	19 kDa	No	Endomembrane System	0.97	GLYMA_02G092600	0.696974	0.445974	0.79357	2.96058	0.994526	2.76326	3.47079	6.23403	0.641683	1.33233	0.0982748	0	0	0	0	0	0	0	0	0	0	0	0	0	0	0	0
	Vesicle associated	Major facilitator superfamily protein, Sugar transporter	56 kDa	Yes	Plasma Membrane	0.98	GLYMA_20G144300	0.0428533	5.85761	0.859996	0.70028	0.177574	0	0	0.344551	1.80761	1.75106	0.424685	0.00297906	0.00705474	0	0	0	0.0129068	0	0.0375582	0.00405708	0.00726308	0	0.286125	0.122875	0.0402479	0.769021	0
	Membrane, integral	ATPase-coupled transmembrane transporter/P-glycoprotein 11	137 kDa	Yes	Plasma Membrane	0.93	GLYMA_13G118800	1.2583	29.1152	12.5451	0	0.340859	0	0	0.660475	0.98464	58.6192	82.7398	0.805756	2.75275	0.121299	3.09145	0.626789	0.0947468	1.09125	0.581489	0.802431	2.82001	1.17238	0.993238	1.64714	1.3638	1.86949	1.11518
	Leucine-Rich Repeat kinases	Glyceraldehyde-3-phosphate dehydrogenase C subunit 1	37 kDa	No	Chloroplast	1	GLYMA_06G172700	0.0548677	0.0406742	0.157816	13.5714	0.287266	0.0209432	0	0.31665	0.996791	0.0394738	0.032175	0.142818	0.0261566	0	0	0.0824999	0.048689	0.0115558	0.0190896	0.0239983	0.537909	0.948391	0.830619	0.723842	0.928226	0.963779	1.0224
	Others	Adenine nucleotide alpha hydrolases-like superfamily protein	17 kDa	No	Cytoplasm	0.7	GLYMA_02G155600	2.33411	1.68522	2.38801	1.42714	2.35584	11.1908	12.6209	24.6729	2.78184	4.92973	3.51909	0.41667	1.00882	0	0.957257	0.0672797	0.291327	2.18418	0.194937	0.591095	0	0	0	0	0	0	0
		Proteasome beta subunit D1_20S	23 kDa	No	Cytoplasm	1	GLYMA_10G295600	0.040801	0	0	0	0.285181	0.050082	0.0305567	0.788705	1.8209	0.0645725	0	0.045312	0.0539552	0.0198552	0.100266	0.127828	0.0629564	0.0574309	0.0742994	0.0523309	0.416516	0.646752	0.443543	0.373042	0.349457	0.0908035	0.317947
		Proteasome regulatory complex, non-ATPase subcomplex, Rpn2/Psmd1 subunit_26S	31 kDa	No	Nucleus	1	GLYMA_05G127300	0.0700393	0.143787	0.119446	0.580013	0.0752462	0	0	0.760717	0.741553	0.111018	0.0782559	0.589863	0.840145	0.358846	0.491798	0.636602	0.94934	0.729063	0.575312	0.576477	0	0	0	0	0	0	0
		Proteasome regulatory complex, non-ATPase subcomplex, Rpn2/Psmd1 subunit	47 kDa	No	Nucleus	1	GLYMA_04G078200	0.0357305	0.0279187	0	1.422	0.169749	0.0830434	0.0683223	0.424539	0.66338	0.0435087	0.0829766	0.0895552	0.0535558	0.169741	0.138229	0.106096	0.0679277	0.0702466	0.0419467	0.0504295	0	0	0	0	0	0	0
		proteasome regulatory complex, non-ATPase subcomplex, Rpn2/Psmd1 subunit_26S	110 kDa	No	Endomembrane System	0.81	GLYMA_08G048800	0.118286	0.0628948	0.0971581	0	0.0513948	0.0283834	0.102699	0.0910859	0.0475565	0.0992124	0	0.374599	0.24695	0.232201	0.418652	0.34517	0.284672	0.287053	0.251603	0.274215	0	0	0	0	0	0	0
		proteasome regulatory subunit S2 1A_26S	97 kDa	No	Nucleus	1	GLYMA_06G289400	0	0	0	0.76929	0.0513926	0.0701792	0.0958384	0.0543912	0.122618	0.0752104	0.0864213	0.447439	0.356069	0.217797	0.36639	0.472667	0.547981	0.388556	0.275529	0.319561	0.25834	0.472583	0.178104	0.27486	0.299585	0.0208847	0.324621
		2-isopropylmalate synthase 1	17 kDa	No	Nucleus	1	GLYMA_11G169473	0	0	0	0	0	0	0	0	0	0	0	0	0	0	0	0	0	0	0	0	0.151895	0.0937815	0.120518	0.100079	0.0362734	0.145305	0.105211
		2-isopropylmalate synthase 1	24 kDa	No	Chloroplast	0.59	GLYMA_11G169891	0	0	0	0	0	0	0	0	0	0	0	0	0	0	0	0	0	0	0	0	0.333761	0.506034	0.212759	0.152321	0.375264	0.074774	0.659809
		2-isopropylmalate synthase	41 kDa	No	Mitochondrion	1	GLYMA_13G025200	0	0	0	0	0	0.496937	0.453515	0	0.0813299	0.0227615	0	0	0	0	0	0	0	0	0	0	3.06573	1.42611	1.10928	1.95778	0.981408	0.755685	0.560036
		6-phosphogluconate dehydrogenase family protein	60 kDa	No	Endomembrane System	0.94	GLYMA_08G254500	0.373486	0.119618	0.0908637	4.37448	0.491489	0.0166955	0	0.583365	1.71017	0.0863053	0.14911	0.63023	0.194613	0.144401	0.224289	0.222728	0.0944159	0.201181	0.273793	0.108222	1.89078	2.65119	1.56258	2.33858	1.17148	0.94182	1.2603
		AAA-type ATPase family protein	45 kDa	No	Cytoplasm	0.7	GLYMA_04G029400	0.1381	0.0241482	0	0.650089	0.231242	0.132552	0.138642	0.336523	0.633301	0.0950409	0.0408507	0.0894376	0.0650695	0.149143	0.076136	0.198222	0.248885	0.0899945	0.133671	0.0672174	0.377032	0.213878	0.177294	0.230013	0.0676714	0.452595	0.889349
		ABC-2 and Plant PDR ABC-type transporter family protein, ATPase	145 kDa	No	Plasma Membrane	0.97	GLYMA_15G019200	0.325023	0	0	0	0	0	0	0	0	0	0	1.08045	3.41396	1.12281	1.54442	0.788744	0.251595	0.789503	2.51208	0.921658	0.0848981	0.321629	0.119596	0.136072	0.0592828	0	0.452974
		ABC-2 and Plant PDR ABC-type transporter family protein, ATPase	168 kDa	Yes	Plasma Membrane	0.99	GLYMA_07G015800	8.61535	12.0271	9.3238	1.42508	4.87431	0.168962	0.0243607	0.339357	0.910628	1.18282	0.255291	3.0251	1.16438	1.07013	0.717406	1.37221	0.877495	0.87886	3.12036	1.86257	0.195519	0.192001	0.116685	0.146754	0.260442	0.232589	0.129565
		ABC-2 and Plant PDR ABC-type transporter family protein, ATPase	168 kDa	No	Plasma Membrane	0.99	GLYMA_08G201300	15.2193	17.3269	12.7011	1.26173	6.08636	0.334648	0.307376	0.494339	0.952061	1.25246	0.71827	4.20574	2.01217	1.22776	0.474038	1.14456	1.09014	0.699551	4.18733	1.51048	0.121669	0.132161	0.189299	0.127571	0.0935786	0.226709	0.145603
		Adenine nucleotide alpha hydrolases-like superfamily protein	18 kDa	No	Nucleus	1	GLYMA_01G106200	0.228227	0	0.126759	0.770535	0.100106	0.194321	0.0800702	0.857993	0.559482	0.159569	0.0319317	0.14182	0.0297528	0.232603	0.548967	0.184853	0.134684	0.131814	0.0424375	0.0850192	0.0819473	0.0435229	0.13361	0.143286	0.1147	0	0.225373
		Adenine nucleotide alpha hydrolases-like superfamily protein	17 kDa	No	Nucleus	1	GLYMA_18G190700	0.0120927	0.0669811	0	0	0.0949013	0	0	0.306029	1.53565	0.0433004	0.186272	0.104838	0.232948	0	0.0518895	0.0174218	0.00951873	0.206199	0.0406196	0.0985893	0.980473	0.437841	0.184576	0.050669	0.329856	0.0512586	0.286825
		Adenine nucleotide alpha hydrolases-like superfamily protein	18 kDa	No	Nucleus	1	GLYMA_11G134900	0	0	0	0	0.0390584	0	0	0.454645	1.52723	0.00977336	0	0.186625	0.186994	0.167418	0.101363	0.146252	0.0635065	0.218125	0.181529	0.181791	0.0983961	0.2467	0.440856	0.27511	0.493507	0.276525	1.72328
		Adenine nucleotide alpha hydrolases-like superfamily protein	18 kDa	No	Nucleus	1	GLYMA_12G058500	0	0	0	0	0	0	0	0.195946	0.706034	0	0	0.121936	0.0948564	0.0232245	0.130238	0.105339	0.0823189	0.073855	0.207653	0.158106	2.38334	0.212095	0.318489	0.380443	0.234695	0.161508	0.132081
		Aldehyde dehydrogenase 2C4	54 kDa	No	Cytoplasm	1	GLYMA_08G039200	0.366222	0.382218	0.249132	0	0	0	0	0	0.258507	0.0799181	0	1.56172	5.04435	1.6644	2.8454	1.34899	0.555535	0.860352	3.93484	2.84801	0.312713	0.306401	0.356337	0.454338	0.311074	0.0856849	0.13347
		Aldolase superfamily protein	38 kDa	Yes	Cytoplasm	0.7	GLYMA_14G189400	0.0692133	0	0.136082	1.69991	0.0566856	0	0	1.96901	5.50753	0.15739	0	0.607371	0.230936	0.326781	0.165929	0.720819	0.608872	0.655501	0.179732	0.167768	0.0113568	0	0.190622	0.0368106	0.0749086	0.203309	5.65681
		Allene oxide synthase	59 kDa	No	Organelle Membrane	0.88	GLYMA_07G162900	2.46565	6.69865	13.1918	0.702346	8.77825	0.0922395	0.171369	0.343745	0.913283	4.03097	1.57452	0.25081	1.06598	0.309826	0.458053	0.767025	0.173319	0.492201	1.92794	2.07775	0	0	0	0	0	0	0
		Alpha/beta-Hydrolases superfamily protein	35 kDa	No	Nucleus	1	GLYMA_01G239600	0	0	0	0	0	0	0	0	0	0	0	0	0	0	0	0	0	0	0	0	0	0	0	0	0	0	0
		Alpha-glucan phosphorylase 2	96 kDa	No	Cytoplasm	0.7	GLYMA_08G334000	0.104395	0.139134	0	0	0.113055	0	0	0	0.109066	0.158794	0.156203	0.382552	0.257046	0.11483	0.249517	0.381971	0.327053	0.333379	0.412433	0.248061	0	0	0.0148077	0.00722425	0	0	0
		Amino acid permease 6	53 kDa	No	Plasma Membrane	0.9	GLYMA_04G088200	0	0	0	0	0	0	0	0	0	0.0222268	0	0.0726702	0.00724568	0	0	0.0196729	0.0296696	0	0.00331391	0	2.63707	2.0831	1.65334	0.650753	0.104246	0.122057	0.574588
		Amino acid transporter 1	65 kDa	No	Plasma Membrane	0.94	GLYMA_09G118900	0	0.0866256	0.201639	0	0	0.220059	1.00343	0.306576	0.0771819	1.09601	1.69717	0	0	0	0	0	0	0	0	0	0	0	0	0	0	0	0
		Ammonium transporter 1;1	53 kDa	No	Plasma Membrane	0.84	GLYMA_20G082450	0	0	0	0	0	0	0	0	0	0	0	0	0	0	0	0	0	0	0	0	0.0222668	0	0.0820246	0.0355658	0.104924	0.406239	0.0290301
		Ammonium transporter 2	52 kDa	No	Plasma Membrane	0.88	GLYMA_05G196500	0.0825853	0	0	0	0	0	0	0	0.215242	0.0217444	0.0293262	0.0134235	0.0745365	0	0.429124	0.0356222	0	0	0.00648253	0.0145781	0.536394	0.272243	0.132943	0.238334	0.0386901	0.127681	0.11859
		Annexin 8/Calcium ion binding	36 kDa	Yes	Nucleus	1	GLYMA_13G199800	0.0787268	0.0453929	2.19157	0	0	0.0166651	0	0.241929	1.42234	1.66215	3.42583	0.155906	0.0926888	0.0102945	0.133344	0.888078	1.13085	0.408908	0.106296	0.0935701	0	0	0.0117232	0.00745015	0.133426	0	0
		Annexin 8/Calcium ion binding	33 kDa	No	Nucleus	1	GLYMA_U031126	0	0	0	0	0	0	0	0	0	0	0	0	0	0	0	0	0	0	0	0	0.1403	0.0259415	0.18498	0.0306419	0.0483276	0	0.124329
		Aquaporin, plasma membrane intrinsic protein 1;4	31 kDa	No	Plasma Membrane	0.6	GLYMA_05G208700	0	0	0	0	0	0	0	0.0983516	0.293878	0	0	0.0363826	0.0304883	0.543822	1.2234	0.451818	0.229956	0.0146448	0.0918747	0.00240077	0.382874	0.133048	0.16	0.112409	0.462855	0.305802	0.497379
		Aquaporin, plasma membrane intrinsic protein 1;4	31 kDa	No	Plasma Membrane	0.79	GLYMA_11G228000	0.52469	0.116699	0.12639	0	0.107625	0	0	0.19073	0.914661	0.0623388	0.111591	0.0946235	0.221732	0.451008	0.284653	0.422957	0.0716458	0.0433776	0.430869	0.132677	0.696012	0.330789	0.424428	0.12656	0.260059	0.363982	0.131681
		Aquaporin, plasma membrane intrinsic protein 1;4	31 kDa	Yes	Plasma Membrane	0.7	GLYMA_08G015300	0.0228357	0	0	0	0	0	0	0.0140502	0.164406	0	0	0	0	0	0	0.0406326	0.209585	0	0.0023118	0	0.0180046	0	0.0324162	0	0.30921	0.210411	0.0257481
		Aquaporin, plasma membrane intrinsic protein 1;4	30 kDa	No	Plasma Membrane	0.72	GLYMA_03G078700	0	0.0101457	0	0	0	0	0	0	0	0	0	0.0937702	0.00433626	0	0	0.04232	0.0612808	0.00784775	0.00321185	0	1.68942	0.873466	2.18562	1.98685	0.788384	0.985109	0.633946
		Aquaporin, Plasma membrane intrinsic protein 2	31 kDa	Yes	Plasma Membrane	0.74	GLYMA_12G172500	0.277692	0	0	0	0	0	0	0	0.680861	0	0	0.224005	0.632822	1.15748	1.97121	0.438862	0.228149	0.531891	0.773877	0.476548	0.191148	0.366916	0.59568	0.374408	0.0816939	0.287404	0.071391
		Aquaporin, Plasma membrane intrinsic protein 2	31 kDa	No	Plasma Membrane	0.86	GLYMA_10G211000	0	0	0	0	0	0	0	0.0140502	0.810325	0	0	0.113594	0.0424565	0.664318	0.670147	1.84595	1.42888	0.380214	0.582348	0.053912	1.44412	0.177166	0.519486	0.56115	0.330821	0.490319	0.437796
		Aquaporin, plasma membrane intrinsic protein 2	30 kDa	Yes	Endomembrane System	0.78	GLYMA_02G073600	0.0114697	0	0	0	0	0	0	0	0.354748	0	0	0.0459079	0.00561674	0.00828174	0	0.0577105	0.100073	0.025252	0.0181417	0.00795908	0.459957	0.0259415	0.278236	0.121204	0.3089	1.39003	0.0471667
		Aquaporin, plasma membrane intrinsic protein 2;4	31 kDa	Yes	Plasma Membrane	0.8	GLYMA_12G075400	0.36199	0.152444	1.07126	0	1.36337	0	0	0.0312809	1.67442	0	0	0.696287	2.2863	0.538441	0.719484	1.278	2.7327	0.739869	2.03114	1.3325	0.0155764	0.0725253	0.02108	0.0134225	1.13575	0	0.0230508
		Aquaporin, plasma membrane intrinsic protein 2;4	31 kDa	No	Plasma Membrane	0.77	GLYMA_11G146500	0	0	0	0	0	0	0	0	0.06141	0	0	0.0855993	0.0809535	0	0.0176693	0.195845	0.27582	0.04214	0.19135	0.163545	0	0	0	0	0	0	0
		Aquaporin/membrane intrinsic protein 2;3	25 kDa	No	Endomembrane System	0.97	GLYMA_01G208200	1.05233	0.0373177	0.465501	0	0	0	0	0.0578092	1.49853	0.00919671	0	0.281376	0.625759	3.1687	0.325488	1.32915	0.374209	0.323977	3.00181	0.954385	0.998868	1.62292	1.35279	0.953531	1.04479	0.486999	0.606143
		Aquaporin/plasma membrane intrinsic protein 2	30 kDa	No	Endomembrane System	0.8	GLYMA_16G155100	0.273612	0.0515657	0.543166	1.47164	0.232775	0	0	0.0150476	1.34366	0	0	0.173405	0.119838	0.257704	0.0106884	0.338423	0.310067	0.423392	0.319376	0.0425534	0.256323	0.157496	0.333645	0.255573	0.168067	0.391523	0.259618
		Aquaporin/Plasma membrane intrinsic protein 2;8	30 kDa	No	Endomembrane System	0.87	GLYMA_06G003200	0	0.229717	0.212411	0	0	0	0	0.337678	0.616754	0.840217	0.998757	0.00191597	0	0	0.0156044	0.00175156	0.0521075	0.00828647	0	0.005021	1.0004	1.39112	1.3173	1.54884	1.09827	1.15698	1.01467
		Ascorbate peroxidase 1	27 kDa	No	Cytoplasm	0.7	GLYMA_11G150243	0	0	0	0	0	0	0	0	0	0	0	0	0	0	0	0	0	0	0	0	9.60875	3.82576	1.39968	1.3176	1.25951	0.634428	1.06313
		ATP binding cassette subfamily B4	138 kDa	No	Plasma Membrane	0.96	GLYMA_02G008000	3.74485	2.72948	3.14761	0.76929	0.526938	0.00824989	0.0295755	0.109247	0.430914	1.99864	1.53991	2.1242	1.27259	1.30233	1.18719	0.766907	0.594478	1.51978	0.492274	0.531707	0.200478	0.278969	1.77547	2.16905	0.237997	2.12489	0.483331
		ATPase 5A	47 kDa	No	Cytoplasm	0.7	GLYMA_10G151900	0.177843	0.101663	0.107619	0	0.12541	0	0	0.416204	0.631789	0.115444	0.0496417	0.292273	0.287219	0.259548	0.138168	0.375428	0.28373	0.213697	0.202527	0.19873	2.00303	1.24743	1.43869	2.17215	0.974489	0.773184	1.40535
		ATPase activity, Pleiotropic drug resistance 12	161 kDa	No	Plasma Membrane	0.99	GLYMA_15G011900	9.47076	4.74983	4.42403	0	3.68429	0	0	0	0.589719	0.968037	0.312482	7.71566	4.66958	0.854246	2.45267	0.934144	0.619135	2.9871	1.60844	1.31903	0.167025	0.0771355	0.10807	0.0891005	0.00813659	0.205534	0.175879
		ATPase activity, Pleiotropic drug resistance 12	162 kDa	No	Plasma Membrane	0.96	GLYMA_19G169400	0	0	0	0	0	0	0	0	0	0	0	8.06015	12.1679	1.10208	1.39923	1.22301	1.24389	3.92828	18.4629	12.3922	0.609996	1.68201	1.17733	0.868681	1.44382	0.690851	0.493866
		ATPase activity, Pleiotropic drug resistance 12	164 kDa	No	Plasma Membrane	0.98	GLYMA_17G206300	0.780859	0.771538	1.45501	0	2.45978	0.0144081	0	0.176838	0.155301	1.1441	1.66083	0.0830131	0.0338301	0.0165341	0.153276	0.439096	0.465462	0.0694974	0.0590378	0.0274057	0.32266	0.528952	0.690701	0.678114	1.31673	11.8628	2.98288
		ATPase activity/Pleiotropic drug resistance 12	161 kDa	Yes	Plasma Membrane	0.99	GLYMA_13G361900	4.26528	3.58208	2.4428	0	0.358238	0	0	0.153684	0.461741	0.740801	0.291016	7.97288	2.51173	0.334259	1.27734	0.799143	0.811391	3.56534	3.38159	2.06805	0.191667	0.0118325	0.145074	0.100875	0.238939	0.114429	0.0925557
		ATPase E1-E2 type family protein / haloacid dehalogenase-like hydrolase family protein	138 kDa	No	Plasma Membrane	0.92	GLYMA_17G123800	0.997394	0.36422	0.0913409	0	0	0	0	0.0351595	0.0590975	0.0745525	0.0274219	0.898689	0.501178	0.272957	0.715461	0.256047	0.107048	0.327431	0.170823	0.261709	0.61941	0.388381	0.701161	0.543629	0.675519	0.831634	0.533004
		ATPase E1-E2 type family protein / haloacid dehalogenase-like hydrolase family protein	133 kDa	No	Plasma Membrane	0.88	GLYMA_06G196400	0.12102	0.44281	0.551212	0	0.244251	0.109608	0.0476551	0.0581064	0	1.30794	1.58823	0.345572	0.324315	0.0929504	0.22854	0.722351	1.22472	0.173578	0.738644	0.315142	0.510769	0.516132	0.808864	0.565661	0.898401	1.18546	0.513359
		ATPase, Calcium transport	118 kDa	No	Plasma Membrane	0.79	GLYMA_09G061200	0.169199	2.69902	1.03971	0	6.14167	0.019302	0	0.134045	0	1.67853	4.36855	0.525693	0.400184	0.375108	0.759025	0.636186	0.511975	0.562321	0.463108	0.436481	0.263806	0.512089	0.338439	0.282749	0.47178	0.805798	0.225513
		ATPase, V0/A0 complex, subunit C/D	41 kDa	Yes	Chloroplast	0.79	GLYMA_09G240300	0.110987	0.0325413	0.114266	0.576502	0.075066	0	0	0.22174	0.956487	0.0554229	0.0568321	0.146494	0.0955581	0.422569	0.146473	0.254339	0.185787	0.233608	0.115847	0.109373	0.0426	0	0.0532487	0.00296555	0	0.28695	0.0568024
		ATPase/Heat Shock protein	73 kDa	No	Extracellular Space	0.73	GLYMA_08G025700	0.207013	0	0	0	0	0.632332	0.313174	0.0317817	0.0686757	0.11596	0.283485	1.0402	0.576773	8.78662	1.05918	2.1085	1.8567	0.291223	0.512203	0.222866	0.809937	1.21365	1.24135	0.956156	0.546588	1.17852	1.07508
		ATPase/Heat Shock protein	74 kDa	No	Extracellular Space	0.73	GLYMA_05G219400	0.0811864	0	0	2.81785	0	0	0	0	1.62871	0.0626866	0.0364463	0.73325	0.471252	5.54249	1.02732	1.9094	1.46661	0.304578	0.458625	0.226564	0.119315	0.115989	0.178663	0.385083	0.0457901	0	0.0429117
		ATPase/Heat Shock protein	72 kDa	No	Cytoplasm	0.7	GLYMA_19G172200	0.336459	0.0119787	0.11672	2.18388	0.94788	0.135697	0.172836	3.32084	4.12051	0.431046	0.116592	0.634459	0.20182	0.259887	0.38184	0.7793	0.869501	0.283036	0.132675	0.075314	0.130866	0.22205	0.313029	0.258696	0.139725	0.0485774	0.157301
		ATPase/Heat Shock protein	71 kDa	No	Cytoplasm	0.66	GLYMA_18G289100	0.0338547	0.0865061	0.119775	0	0	0.510117	0.353056	0.295981	0	0.150347	0	0.57852	0.032834	0.260243	0.180484	0.066168	0.0413311	0.125605	0.0260864	0.00247058	0.245163	0.203166	0.221097	0.161191	0.172296	0.222299	0.163635
		ATPase/Heat Shock protein	71 kDa	No	Nucleus	1	GLYMA_02G302500	0.745172	0.422647	1.27493	1.23409	1.75703	1.29863	1.41874	5.56966	8.83243	1.63589	1.07768	1.66211	0.678199	0.50045	0.946327	2.00983	2.13997	0.644617	0.704624	0.439763	0.239603	0.200268	0.149502	0.0719038	0.368956	0.062654	0.289214
		ATPase/Heat Shock protein	75 kDa	No	Cytoplasm	0.7	GLYMA_18G287800	0.202211	0.0920389	0	0	0.0605675	0	0	0.0456025	0.00886462	0.0176419	0	0.715242	0.892885	0	0.963461	0.280358	0.143649	0.135138	0.249879	0.134503	0	0	0.00216577	0	0	0	0
		ATPase-coupled transmembrane transporter/P-glycoprotein 20	155 kDa	No	Plasma Membrane	0.92	GLYMA_10G290800	0.372553	0.422124	0	0	0.16675	0.0992696	0.122066	0	0	0.311215	0.296256	0.392974	0.304629	0.170928	0.59389	0.334997	0.259435	0.453196	0.217061	0.386192	0.902696	0.814481	0.409749	0.266556	3.2795	0.118274	0.18982
		ATPase-coupled transmembrane transporter/P-glycoprotein 20	155 kDa	No	Plasma Membrane	0.9	GLYMA_02G094800	0.0485132	0.100539	0	0	0.384317	0.261205	0.236051	0.120976	0	0.100081	0.164674	0.195213	0.22855	0.133137	0.338152	0.240719	0.352363	0.153467	0.186024	0.182334	0.00265951	0	0.00454207	0	0	0	0
		ATPase-coupled transmembrane transporterP-glycoprotein 18	136 kDa	No	Endomembrane System	0.83	GLYMA_18G012700	0	0	0	0	0	0	0	0	0	0	0	0	0	0	0	0	0.0274519	0	0.00594972	0	0.190864	0.113829	0.179123	0.221366	0.0674568	0.139598	0.12147
		ATP-citrate lyase B-1	68 kDa	No	Mitochondrion	1	GLYMA_15G140300	1.87275	1.29617	1.93313	1.31886	0.112605	0	0	0.289469	2.43058	0.952679	0.54996	1.36224	0.410869	0.257679	0.258306	1.20446	0.841106	0.418768	0.561076	0.210505	0.453321	0.667855	0.351505	0.343231	0.215032	0.910253	0.378383
		Bifunctional inhibitor/lipid-transfer protein/seed storage 2S albumin superfamily protein	13 kDa	Yes	Plasma Membrane	1	GLYMA_09G014400	0.32236	0.171144	0.282715	0	0.199639	0	0	1.56145	4.61013	0.408977	0.249087	0	0.000400604	0	0	0.00935957	0	0	0.0242751	0	0.340925	0.0845131	0.448427	0.375385	0.0593944	0.129509	0.144401
		Calcium ion binding, membrane	86 kDa	No	Endomembrane System	0.96	GLYMA_12G204400	7.27453	1.39025	2.13712	0	0.527317	0	0	0.0638731	0.56661	0.361197	0.0649688	1.00729	1.7725	3.55044	1.07484	2.11014	0.94692	2.84622	1.87083	2.60935	0.516729	0.289448	0.885022	1.0543	0.97076	0.144184	1.21792
		Calcium-binding tetratricopeptide family protein	90 kDa	No	Nucleus	1	GLYMA_10G132800	0.0224729	0.0218284	0	0	0	0.074335	0.127139	0.112344	0.0285147	0.0517445	0.0707801	0.148917	0.182999	0.211681	0.112861	0.19416	0.123519	0.136123	0.160999	0.17222	1.4977	2.59951	0.811833	0.539752	3.30164	3.43369	0.916178
		Calcium-dependent lipid-binding (CaLB domain) family protein	62 kDa	No	Endomembrane System	0.86	GLYMA_11G107300	0.859357	0.509022	0.212276	0	0.331142	0.690908	0.72806	0.0647439	0	0.384999	0.0814516	0.297498	0.402602	0.182308	0.652734	0.494091	0.280765	0.612299	0.456722	0.253433	0.518065	0.284123	0.269899	0.280327	0.0876409	0.367308	0.18468
		Calcium-dependent protein kinase 21	59 kDa	No	Nucleus	1	GLYMA_07G260200	0.137988	0	0	0	0.0205291	0	0	0.121052	0.262491	0.244941	0.173955	0.149328	0.0971385	0.0247871	0.0621472	0.47869	0.250572	0.191169	0.198465	0.131738	0.119386	0.551616	0.202378	0.20733	0.321623	0.0800852	1.87316
		Calcium-transporting ATPase	114 kDa	No	Plasma Membrane	0.76	GLYMA_02G186100	0.2295	0.359349	0.614468	0	0.583933	0	0	0	0	0.161755	0.167142	0.559503	0.615987	0.740544	0.588226	0.81259	0.546345	0.488369	0.676524	0.507615	0.069438	0.0802689	0.137223	0.0663015	0.0518314	0.0208847	0.109954
		Calcium-transporting ATPase	113 kDa	No	Plasma Membrane	0.68	GLYMA_15G167500	0.444531	0.922752	6.22416	0	2.00925	0.0662675	0.0801597	0	0	0.58364	1.44069	0.483654	0.535513	0.438167	1.17272	0.717698	1.27541	0.800241	0.429187	0.411403	0	0	0	0	0	0	0
		Calmodulin-domain protein kinase 9	62 kDa	No	Cytoplasm	0.7	GLYMA_18G096500	1.59906	2.84258	1.44428	0	0.694977	0.224218	0.19729	0.426238	0.732585	4.25074	4.99826	0.491414	0.266284	0.635524	0.514788	0.366426	0.126056	0.105127	0.286402	0.104767	0.0992463	0.0236615	0.124295	0.155691	0.25576	0.15803	0.128855
		CASP-like, sulfur binding	21 kDa	No	Endomembrane System	0.9	GLYMA_07G251300	0.140334	0	0	0	0	0	0	0	0	0	0	0.487314	2.60269	3.74055	11.9539	0.57695	0.0754385	2.11433	0.163706	0.496205	0.953953	0.939271	1.46832	1.22194	1.76362	0.844216	1.28393
		Cell elongation protein / DWARF1 / DIMINUTO (DIM)	66 kDa	No	Cytoplasm	0.7	GLYMA_12G028300	0	0	0	0	0	0	0	0	0.12917	0	0	0.0301854	0.0294681	0.0546815	0.080468	0.53423	0.26825	0.0287591	0.0555077	0.0130802	0.647363	0.702093	0.51549	0.72369	0.491792	0.465375	0.74386
		Cellulose synthase 6	164 kDa	No	Plasma Membrane	1	GLYMA_10G223450	0	0	0	0	0	0	0	0	0	0	0	0	0	0	0	0	0	0	0	0	0.440363	0.551346	0.718184	0.401118	0.732048	1.12961	0.427849
		Chaperone protein dnaJ-related	47 kDa	No	Nucleus	1	GLYMA_07G143100	0.804243	0.49286	0.514802	0	0.293787	0.10199	0.0793834	0.73213	0.576032	0.407494	0.208648	0.476181	0.102297	0.233408	0.044649	0.0668868	0.0434924	0.0758218	0.146505	0.0705638	0.805814	0.781757	1.31828	0.787934	1.50009	1.14049	1.14447
		Clathrin light chain protein/vesicle membrane	35 kDa	No	Nucleus	1	GLYMA_15G072100	0.642281	0.378999	0.494924	1.01425	0.405695	0.0697207	0.0839098	0.27528	1.16496	0.181937	0.137873	1.52786	1.40699	1.7361	1.71725	1.77696	1.25514	1.08895	1.16351	0.695606	1.13034	1.56149	1.41534	1.31605	2.59028	2.10687	1.68335
		Clathrin light chain protein/vesicle membrane	35 kDa	Yes	Nucleus	1	GLYMA_13G241300	0.273765	0.103977	0	0.621659	0.68252	0.159175	0.12023	2.24764	1.10221	0.394421	0.234261	0.584581	0.58228	1.02428	0.675293	0.661149	0.603246	0.623942	0.568835	0.609979	0.855848	0.480454	0.955001	0.8106	1.08186	0.454626	0.94687
		Clathrin, heavy chain/Vesicle associated	193 kDa	Yes	Cytoplasm	0.7	GLYMA_18G026000	0.260416	0.100186	0.384061	0	0.188628	0	0	0	0.171948	0.126651	0.299307	0.373348	0.380979	0.265264	0.502517	0.89905	0.65638	0.360351	0.412919	0.311726	0.102903	0.0384219	0.153818	0.0517029	0.757453	0.0595125	0.00554742
		Clathrin, heavy chain/Vesicle associated	193 kDa	No	Cytoplasm	0.7	GLYMA_11G231100	0.773891	0.398684	0.785166	0	0.641942	0.141321	0.0928063	0.0373004	0.113145	0.572857	0.56522	0.697316	0.569132	1.31528	0.993322	1.78946	1.25976	0.820232	0.723755	0.613032	0.0590633	0.132412	0.332146	0.114641	0.328816	0.303647	0.0529481
		Clathrin, heavy chain/Vesicle associated	193 kDa	Yes	Cytoplasm	0.7	GLYMA_14G058300	1.11799	1.20928	1.72407	0	0.920111	0.324965	0.080117	0.137317	0.214005	0.765924	0.436356	1.74789	1.72799	1.67843	1.96867	1.84478	1.24592	1.84609	1.55793	1.59357	0.366903	0.457513	0.394593	0.193127	0.486066	0.696537	0.167149
		Clathrin, heavy chain/Vesicle associated	193 kDa	No	Cytoplasm	0.7	GLYMA_02G258200	0.656733	0.483171	0.514575	0	0.365922	0.297377	0.313453	0.0140232	0	0.3842	0.373845	0.820028	0.870682	0.820385	0.719702	0.948205	0.932148	0.899676	0.839326	0.810989	0.217834	0.157108	0.366513	0.166962	0.306552	0.556138	0.176111
		Clathrin, heavy chain/Vesicle associated	193 kDa	No	Cytoplasm	0.7	GLYMA_14G195400	0.0466879	0.0829063	0	0	0	0.132296	0.177705	0	0	0.0417131	0.0869203	0.0552921	0.00255859	0.177021	0.0765197	0.315827	0.307404	0	0.0376536	0.00717453	0.327417	4.58738	1.15113	0.639629	5.76752	1.1746	0.500257
		Clathrin, heavy chain/Vesicle associated	193 kDa	No	Cytoplasm	0.7	GLYMA_11G062900	0.104479	0.0277485	0	0	0.260137	0.131031	0.164755	0	0	0.238074	0.310028	0.111197	0.161241	0.404018	0.0345234	0.46583	0.465596	0.0269398	0.196253	0.0497938	0.791187	7.46165	2.68903	2.01382	9.30057	2.91358	0.660971
		Coatomer, alpha subunit/Vesicle-mediated transport	137 kDa	No	Nucleus	1	GLYMA_10G199300	0.109118	0.0462818	0	0	0.15217	0.328819	0.305892	0.487937	0.352555	0.154383	0.0551592	0.286604	0.251697	0.329033	0.257558	0.607502	0.39396	0.307436	0.210165	0.277383	1.52787	0.681659	2.31653	2.60259	2.13003	3.67107	1.68216
		Coatomer, beta subunit/Vesicle-mediated transport	106 kDa	No	Endomembrane System	0.95	GLYMA_07G004100	0.299897	0.0425615	0.122647	0	0.0499721	0.014331	0	0.14059	0.245257	0.0445675	0.0819575	0.211081	0.136296	0.293939	0.355649	0.515419	0.386211	0.310012	0.13959	0.120332	0.0804958	0.175801	0.0734591	0.183595	0.0704264	0.0162229	0.0975503
		Cobalamin-independent synthase family protein	84 kDa	No	Cytoplasm	0.7	GLYMA_19G114500	0.233221	0	0	82.366	0.176979	0	0	0.514007	1.95694	0	0	0.578686	0.147292	5.3296	0.210568	1.77389	1.43701	0.191095	0.337068	0.0530271	0.191798	0.933194	1.34729	0.231451	0.175021	0.199928	0.352389
		Cobalamin-independent synthase family protein	84 kDa	No	Cytoplasm	0.94	GLYMA_16G038300	0.500987	0	0.138687	98.4893	0.549841	0	0	1.07676	5.27209	0.295033	0.610773	1.84715	1.29286	10.3594	0.824408	4.01493	2.53842	0.469334	0.518903	0.175644	0.936597	0.611677	0.696225	0.79537	0.761209	0.831882	0.761934
		Cold-regulated 47	24 kDa	No	Nucleus	1	GLYMA_04G009400	5.89624	8.25389	1.55028	10.2678	0	0	0	1.84323	6.59443	2.37046	0.13354	2.86347	1.14103	5.09402	1.41872	1.50918	0.691988	5.53474	2.35569	3.88629	0.385126	0.484213	0.0948497	0.0477342	0.134041	0.0208847	0.149429
		Concanavalin A-like lectin protein kinase family protein	76 kDa	No	Plasma Membrane	0.99	GLYMA_17G218500	0.0272367	0.114923	0.412632	0	0.223861	0	0	0.0881248	0	0.552818	1.3714	0.121228	0.0766826	0.0425529	0.0645121	0.22028	0.155306	0.0760692	0.155786	0.111768	0.300083	0.147598	0.0401478	0.0622249	0.262492	0	0
		Cupredoxin superfamily protein	67 kDa	No	Anchored Component Of Plasma Membrane	1	GLYMA_17G138300	0.961465	0.0536452	0.0967258	0	0.03226	0.0495688	0.0919453	0.0232773	0.412887	0.40866	0.255078	0.173495	0.0993762	0.953297	4.18917	1.57129	3.28743	0.0825291	0.279983	0.0292619	0.257077	0.663673	0.178795	0.269645	0.304666	0.10262	0.525247
		Cyclic nucleotide gated channel 5	83 kDa	No	Plasma Membrane	0.96	GLYMA_02G204300	2.32541	4.25265	1.77519	0	0.918505	1.62139	2.22643	0.0847282	0.139156	3.40543	2.47732	1.03344	1.08036	0.619607	0.943527	0.557535	0.472003	1.01938	1.29715	1.28319	0.895559	0.498984	1.2629	1.5932	0.162391	0.310372	0.870993
		Cytochrome b561/Auxin-responsive/Integral membrane-protein	44 kDa	No	Plasma Membrane	0.72	GLYMA_07G266300	0.0854298	0.374019	1.39127	0.70028	0.0585005	0	0.0210931	0.0345476	0.219696	0.0877393	0.025025	0.230995	0.194946	0.618198	0.254297	0.0690392	0.0558974	0.066587	0.12027	0.0170317	0.240399	0.127606	0.127045	0.228254	0.11448	0.724601	1.53378
		Cytochrome b561/Auxin-responsive/Integral membrane-protein	44 kDa	No	Plasma Membrane	0.79	GLYMA_17G008000	1.13038	1.21063	2.99506	0.697204	0	0.0204249	0.0392422	0.0852893	0.360028	0.385651	0.129361	0.927609	0.556073	1.44903	1.90182	0.275369	0.107372	0.133284	0.494585	0.097294	0.44182	0.599682	0.777754	0.691355	0.535344	0.105041	0.287586
		Cytochrome b561/Auxin-responsive/Integral membrane-protein	44 kDa	No	Endomembrane System	0.75	GLYMA_15G115600	5.82938	2.82287	3.23491	4.81339	2.82992	0	0	0.498057	2.33277	2.0968	0.655714	1.18768	0.688639	0.568345	0.59285	0.219716	0.263945	0.0784452	0.447377	0.112522	0.318699	0.0990245	0.352874	0.225623	0.407731	1.09752	0.384702
		Cytochrome b561/ferric reductase transmembrane protein family	25 kDa	Yes	Endomembrane System	0.97	GLYMA_10G236200	0.891312	0.0377178	0.133985	0	0.789376	0	0	0.291923	3.35377	0.010665	0	1.50904	2.08639	1.74352	2.90682	1.17243	0.680835	1.80792	2.07045	2.37773	0.120467	0.210145	0.214747	0.111253	0.230903	0.209092	0.261027
		DC1 domain-containing protein	64 kDa	No	Cytoplasm	0.7	GLYMA_08G285900	0.610507	0.362942	0.800899	0.76929	0.997752	0	0	0.522373	1.08631	0.135822	0	1.68059	0.120438	0.119137	0.34766	0.282479	0.255975	0.611814	0.121197	0.036063	0.234707	0.271737	0.0708889	0.0229166	0.0807911	0.0208847	0.0288653
		DCD (Development and Cell Death) domain protein	64 kDa	No	Nucleus	1	GLYMA_08G007500	0.210751	0.0740548	0.348436	0	0.327508	0.074002	0.113152	0	0.0701538	0.147486	0.16093	0.590729	0.498959	0.189026	0.170191	0.567767	0.705444	0.312109	0.511916	0.425942	0.329041	0.679005	0.430105	0.32351	1.07214	0	0.183742
		Diacylglycerol kinase 7	54 kDa	No	Chloroplast	0.8	GLYMA_13G093100	0.655564	0.474707	0.645612	0	0	0	0	0	0.170617	0.160073	0.192116	0.353224	0.166355	0.412485	0.166167	0.36965	0.313419	0.162691	0.26767	0.134401	0.481624	0.770011	0.778061	0.563232	1.31142	0.707205	0.593814
		Dynamin-like/GTPase	69 kDa	No	Nucleus	1	GLYMA_08G046400	0.205995	0.158385	0.417082	0	0.0979702	0	0	0.0254773	0.180248	0.0527307	0	0.105079	0.0970232	0.340964	0.0581469	0.483894	0.683731	0.0269795	0.144992	0.0361709	0.358648	0.375419	0.31017	0.458315	0.344892	0.22242	0.602075
		Dynamin-like/GTPase	69 kDa	No	Nucleus	1	GLYMA_03G102800	0.219531	0.628984	0.356031	0	0.167829	0	0	0.0524067	0.209274	0.328941	0.221204	1.26115	0.84251	0.0208581	0.342135	0.0511152	0.0766095	0.523257	0.243315	0.342698	0.135876	0.0418429	0.0872971	0.171101	0.104589	0	0.0408568
		Dynamin-like/GTPase	100 kDa	No	Nucleus	1	GLYMA_07G273100	0.264282	0.202331	0.084016	0	0.0205291	0.32142	0.258103	0	0.164346	0.138853	0.266613	0.319413	0.170418	0.630072	0.201585	0.550795	0.555404	0.208894	0.233726	0.180741	0.391445	0.37059	0.372214	0.464461	0.412903	0.280381	0.688797
		Dynamin-like/GTPase	100 kDa	Yes	Nucleus	1	GLYMA_17G001500	0.321262	0.351779	0	0.507125	0.389223	0.420641	0.417305	0.0890412	0.0777484	0.274352	0.495315	0.408994	0.48733	0.925038	0.373345	0.943953	1.01091	0.582477	0.442549	0.42329	0.697731	1.36667	1.07549	0.727318	2.1366	1.25537	0.546025
		Dynamin-like/GTPase	89 kDa	No	Nucleus	1	GLYMA_08G067100	0.155039	0.217885	0.427671	0	0.37386	0.274641	0.177722	0.117864	0	0.129454	0.11833	0.495538	0.447114	0.212464	0.414177	0.424621	0.511804	0.783584	0.344606	0.465067	0.0919164	0.285354	0.0705809	0.0474781	0.00924573	0.164711	0.101918
		Dynamin-like/GTPase	69 kDa	Yes	Chloroplast	0.77	GLYMA_08G340200	0.275265	0.0753638	0.17765	0	0.321046	0.527948	0.434416	0.313484	0.103205	0.338597	0.374054	0.124768	0.172715	0.0905528	0.119367	0.0652899	1.96357	0.130742	0.0479177	0.10051	0.0556071	0.067302	0.167658	0.096427	0.0278195	0.16944	0.298102
		Dynamin-like/GTPase	91 kDa	Yes	Nucleus	1	GLYMA_13G256100	0.0627667	0.301941	0.140252	0	0.224416	0.634792	0.472217	0.101861	0.191744	0.238753	0.27816	0.379657	0.405842	0.382621	0.444594	0.407452	0.283626	0.415496	0.363348	0.424987	0.474316	0.85574	0.367815	0.528495	0.51365	0.337863	0.348405
		Dynamin-like/GTPase	69 kDa	Yes	Nucleus	1	GLYMA_05G239300	0.391653	0.409772	0.0548276	2.17569	0.406026	0.131934	0.101953	0.0803774	0.0642013	0.0274215	0.0231713	0.573592	0.45297	0.70047	0.407096	1.25748	2.30433	0.378882	0.746433	0.498711	0.39894	0.236194	0.246469	0.247476	0.088392	0.313338	0.3012
		Embryo-specific protein 3, (ATS3)	21 kDa	Yes	Anchored Component Of Plasma Membrane	1	GLYMA_10G242000	0.0705139	0.024072	0.244995	0	0.0263356	0	0	0.0777872	0.292028	0.0620314	0.0921066	0.104637	0.0482673	0.0204497	0.0129195	0.0749566	0.0492938	0.0735812	0.0628235	0.0795439	0.475954	0.228506	0.360025	0.216064	0.780018	0.404327	0.280871
		Enolase	48 kDa	No	Cytoplasm	0.86	GLYMA_16G204600	0.267176	0.29238	0.344446	0.460087	0.659684	1.2451	1.31894	2.32747	0.682947	1.15919	1.22705	0.504559	0.0424972	0	0.054152	0.167631	0.0737389	0.112828	0.00849857	0.0258406	0.00534926	0.0396203	0.0356975	0.0180734	0	0.161619	0.0120845
		ERD (early-responsive to dehydration stress) family protein	89 kDa	No	Plasma Membrane	0.89	GLYMA_07G263300	0.631832	0.249768	0.338673	1.01859	0.369364	3.39151	2.8058	0.151574	0.0748637	0.257317	0.0201574	0.280859	0.287779	0.624591	0.438392	0.508188	0.64082	0.18902	0.820854	0.300814	0.00555448	0	0.0348971	0.030748	0	0	0
		ERD (early-responsive to dehydration stress) family protein	87 kDa	No	Plasma Membrane	0.93	GLYMA_02G271300	0.353593	0.259073	0.462908	0	0.256798	0.241917	0.200082	0.0345476	0	0.243873	0.300715	0.11624	0.255542	0.463717	0.220422	0.539975	1.10625	0.0649929	0.339978	0.187761	0.0610482	0	0.116145	0.136622	0	0.366318	0.18289
		ERD4/ Integral membrane	82 kDa	Yes	Plasma Membrane	0.92	GLYMA_15G091600	2.77186	0.350744	0	0	0	0	0	0	0	0.251073	0	0.229058	0.64176	0.732284	0.354698	0.392841	0.270502	0.822171	0.647699	0.723613	0.26273	0.199516	0.321226	0.21571	0.0640679	0.087925	0.255611
		Eukaryotic aspartyl protease family protein	51 kDa	No	Extracellular Space	0.81	GLYMA_19G256400	0	0	0	0	0	0	0	0	0	0	0.0327031	0.039458	0.00359977	0	0	0.0479176	0.0765639	0.0299343	0.0151327	0.00986191	0.289583	0.120551	0.284791	0.25142	0.0922927	0.0995213	0.52915
		Eukaryotic aspartyl protease family protein	51 kDa	No	Plasma Membrane	0.81	GLYMA_07G055300	0.265552	0.023386	0.0863521	0	0.491293	0	0	0	1.29752	0.038695	0	0.0224105	0.00366989	0	0	0.00968286	0.0136855	0.00774614	0	0.00395184	0.275852	0.111392	0.373436	0.346633	0.344737	0.0425766	1.02711
		FASCICLIN-like arabinogalactan 2	48 kDa	No	Endomembrane System	0.98	GLYMA_14G004200	0.338405	0.150074	0.227185	0	0.350498	0.73202	0.749571	1.00193	1.19127	0.248181	0.083255	0.0490676	0.0555262	0.253967	0.105531	0.217761	0.143951	0.0240218	0.253591	0.0277555	3.04721	3.06727	2.8059	3.06478	1.92399	3.75303	1.76823
		FtsHi complex/ATPase	104 kDa	No	Organelle Membrane	0.87	GLYMA_08G023900	0.167292	0.156928	0.0918231	0	0.150029	0.0395562	0.0347943	0	0.0796726	0.185031	0.16468	0.136816	0.184262	0.159275	0.0144723	0.232564	0.348704	0.163888	0.222888	0.208349	1.98268	1.13054	2.36976	2.35011	1.79595	0.843171	1.82841
		General regulatory factor 2	27 kDa	Yes	Nucleus	1	GLYMA_04G099900	0.078143	0	0	2.05165	0.45317	0	0	1.08187	2.94748	0.0819017	0	0.431695	0.257233	0.532161	0.437121	0.400043	0.287255	0.166441	0.222677	0.12604	2.37344	1.65979	4.97697	4.24675	7.55793	7.91634	6.0266
		General regulatory factor 2	29 kDa	No	Nucleus	1	GLYMA_02G208700	0.289033	0.22416	0.175452	2.24606	0.335879	0	0.0271662	2.60783	3.10442	0.516393	0.433843	0.46706	0.672747	0.527434	0.606456	0.542943	0.766209	0.496316	0.445626	0.248509	0.56155	0.84571	1.38964	0.723458	1.88973	1.33123	0.36172
		Glucan synthase-like 10	219 kDa	No	Plasma Membrane	0.98	GLYMA_20G244900	3.73987	3.69406	3.70372	0	7.34294	1.35551	1.07572	0.268666	0	3.0447	2.34026	2.72723	2.60279	2.81885	3.35722	2.75973	4.55591	3.23739	2.40431	3.16574	0	0	0	0	0	0	0
		Glucan synthase-like 10	219 kDa	Yes	Plasma Membrane	0.97	GLYMA_10G295100	1.19498	1.17221	1.2545	0	2.65934	0.969619	0.987895	0	0	1.41992	1.34928	1.23591	0.92371	0.706205	1.0183	1.70888	2.19512	1.18658	1.14282	1.09384	4.16326	3.09225	3.58575	3.34858	2.52715	1.7676	1.40554
		Glucan synthase-like 12	226 kDa	No	Plasma Membrane	0.98	GLYMA_08G361500	2.43403	1.54065	1.86162	2.81901	7.45613	2.91095	2.67387	0.203035	0.218539	2.01523	2.14537	2.22579	1.05023	0.127778	1.04514	4.41219	5.46692	1.3828	2.17167	1.3045	6.10825	5.12475	4.67079	5.05095	2.57911	3.24016	2.90336
		Glucan synthase-like 12	226 kDa	No	Plasma Membrane	0.98	GLYMA_18G300200	0.988001	3.85501	3.89963	0	0.942466	1.65613	1.60768	0.316546	0.648718	5.75041	9.83196	0.241257	0.0775013	0.110111	0.0427811	1.24989	3.77176	0.206934	0.259001	0.152594	3.20839	3.56385	1.75729	3.21058	3.5441	0.711189	1.8339
		Glucan synthase-like 5	206 kDa	No	Plasma Membrane	0.96	GLYMA_12G113302	0	0	0	0	0	0	0	0	0	0	0	0	0	0	0	0	0	0	0	0	0.69394	0.715916	0.437727	0.468763	0.106918	0.634934	0.686723
		Glucan synthase-like 8	218 kDa	No	Plasma Membrane	1	GLYMA_06G173500	4.02593	3.05359	4.57611	0.770535	2.72058	3.89192	4.14428	0.509539	0	2.25654	2.39388	2.97409	2.60347	2.62536	2.40434	3.07189	4.93536	3.11308	2.68603	3.52383	0.0442471	0	0.0616487	0.0267296	0.00719816	0.133634	0.0417406
		Glucan synthase-like 8	159 kDa	Yes	Endomembrane System	0.89	GLYMA_04G192300	8.0315	7.51931	8.54438	0	6.13328	6.57469	4.81779	0.477384	0.190232	6.40974	5.7915	4.12624	3.29184	3.19586	2.28685	4.60156	6.83529	4.3411	3.81749	4.14106	0.0394039	0	0	0.00530917	0	0	0
		Glutamine synthase clone R1	39 kDa	No	Cytoplasm	0.7	GLYMA_11G215500	1.49233	0.791471	1.56591	19.2505	2.67191	3.67103	3.7895	19.8231	4.94322	3.99179	1.95751	4.00949	4.12751	4.4356	4.20359	2.05549	1.539	0.892875	3.77424	0.956308	0.052154	0.0313782	0.0419399	0.0198492	0.0219022	0	0.00954985
		Glutathione S-transferase TAU 8	26 kDa	No	Cytoplasm	0.7	GLYMA_07G140400	2.24536	0.251106	0.844321	0	0.525721	0	0	0.784586	6.3605	0.551463	0.300128	1.8604	1.13285	1.89375	3.61719	0.567878	0.246603	0.354027	1.14676	0.556718	0.0933718	0.0358469	0.402158	0.295747	0.218234	0.225035	0.406784
		Glycoside_hydrolase_SF	32 kDa	No	Cytoplasm	0.7	GLYMA_03G024400	0	0	0	0	0	0	0	0	0	0	0	0.0226078	0.0379261	0.568632	0.113939	0.0184302	0.0031273	0	0.00215415	0	0.234604	1.02865	0.216056	0.330402	0.175493	0.127681	0.203995
		Glycosyl hydrolase family 81 protein	81 kDa	No	Chloroplast	1	GLYMA_13G048800	0.00450329	0	0	0	0	0	0	0	0	0	0	0.112532	0.125565	0.0599079	0.309192	0.0429543	0	0.0229585	0.113363	0.0379299	0.146822	1.75071	0.184008	0.140184	0.235434	0.106204	0.0684869
		GTP binding Elongation factor Tu family protein	49 kDa	No	Cytoplasm	0.7	GLYMA_05G114900	0.122341	0	0	1.324	0	0	0	3.50405	3.05545	0.188576	0	0.450434	0.212257	0.17423	0.239739	0.677159	0.534569	0.323681	0.136632	0.174226	0.0899722	0.0955645	0.175607	0.430564	0.124372	0	0.119835
		GYF domain-containing protein	179 kDa	No	Nucleus	1	GLYMA_16G053500	0.139624	0.476253	0.3541	0	0.650826	0.553798	0.600087	0.165697	0.306677	0.451156	0.57048	0.797913	0.806888	0.530184	1.13728	0.883426	0.835865	0.774644	0.682157	0.646277	0.347429	3.87946	0.122915	0.424522	0.846173	0.336169	0.0391839
		H(+)-ATPase 11	85 kDa	Yes	Plasma Membrane	0.86	GLYMA_04G174800	0.307027	0.239453	0.394639	0	0.103578	0.038326	0.0925834	0.0786979	0.0433261	0.262206	0.175318	0.17196	0.0683166	1.69039	0.0728918	0.484495	0.345761	0.0579559	0.223645	0.0602493	0.297629	0.0793938	0.173259	0.0627834	0.0981439	0.149117	0.203472
		H(+)-ATPase 11	105 kDa	Yes	Plasma Membrane	0.8	GLYMA_17G096100	0.0309824	0.226293	0.141393	0	0	0	0	0	0.0674727	0.296372	0.254416	0.105505	0.111708	0	0	0.337886	0.195583	0.223003	0.239069	0.561077	0.00634034	0	0.00232359	0.0146157	0	0	0
		H(+)-ATPase 11	105 kDa	Yes	Plasma Membrane	0.76	GLYMA_06G189900	0.0764288	0.0517037	0.383111	0	0.483085	0	0	0	0	0.0234291	0	0.113919	0.166518	0.0149427	0.0674098	0.943647	0.822941	0.117688	0.29554	0.0934225	0.0540759	0.271529	0.239485	0.835376	0.171026	0.087033	0.15241
		H(+)-ATPase 11	101 kDa	Yes	Plasma Membrane	0.77	GLYMA_05G030700	0	0	0	0	0.11031	0	0	0	0	0.0313668	0	0.109843	0.0897203	0.0425241	0.0227266	0.602046	0.415773	0.0880383	0.109338	0.0626707	0.212141	0.0892373	0.400111	0.271048	0.225994	0.0417693	0.142907
		H(+)-ATPase 11	105 kDa	Yes	Endomembrane System	0.77	GLYMA_19G019200	0.0561341	0.112258	0.277373	0	0.374925	2.60121	2.79187	0.112406	0	0.0831527	0.0345094	0.267661	0.241236	0.133868	0.0808314	0.0977379	0.0491581	1.67988	0.280127	0.283595	0.282329	0.414743	0.881618	1.22935	0.334778	2.48089	0.599319
		H(+)-ATPase 11	98 kDa	No	Endomembrane System	0.87	GLYMA_13G065400	0	0.0272381	0	0	0.262989	0.141997	0.238823	0.151672	0.0830841	0.0101149	0	0.00986755	0.00336374	0.0176647	0	0.00208872	0	0.0445185	0	0.00415149	0.0326398	0.0271637	0.0501852	0.0750417	0	0.479764	0
		H(+)-ATPase 2	105 kDa	No	Plasma Membrane	0.8	GLYMA_17G061800	0	0.138423	0	0	0.0932991	0.150376	0.0135206	0	0	0.200026	0.422519	0.577798	0.199468	0.0421949	0.432395	0.187318	0.183227	0.206722	0.0533807	0.0483818	0.414682	0.566679	1.52525	3.6489	0.379627	0.46792	0.397266
		H(+)-ATPase 2	105 kDa	No	Plasma Membrane	0.84	GLYMA_15G162600	0.606006	0.504063	0.348611	0	0.48381	0	0	0.0946831	0.561619	0.0493403	0	0.940025	2.63971	1.57135	1.80483	0.986043	0.497254	0.357044	0.804947	0.288253	0.0534944	0	0.249077	0.207121	0.0378026	0.091154	7.17758
		H(+)-ATPase 2	105 kDa	Yes	Plasma Membrane	0.86	GLYMA_09G056300	1.11431	0.902599	0.26791	0	0.867526	0.033391	0.0308983	0	0.541794	0.079351	0.132118	3.62776	7.66227	6.23049	4.39874	1.57882	1.58763	1.67516	1.36882	1.113	0.485153	1.82893	0.600241	0.316198	0.584609	0.388451	0.656057
		H(+)-ATPase 5	105 kDa	No	Plasma Membrane	0.82	GLYMA_17G199200	0	0	0	0	3.73063	0	0	0	0.0771819	0.0118039	0	0.121691	0.0603159	0	0.108128	0.0311547	0.0532903	0.075783	0.0169684	0.01678	0.126296	0.0502474	0.0891092	0.0793498	0.0867989	0.101867	0.0717204
		H(+)-ATPase 5	105 kDa	Yes	Plasma Membrane	0.84	GLYMA_14G134100	0.0820299	1.2281	12.22	0	32.5275	0	0	0.160035	0.150525	0.15932	0	0.744309	0.121808	0.134436	0.376964	0.26977	0.295144	0.287558	0.155076	0.112729	0.0273241	0.164689	0.161795	0.0540019	0.176114	0.109726	0.332565
		H(+)-ATPase 5	105 kDa	Yes	Plasma Membrane	0.84	GLYMA_06G076100	0	0	0	0	0.13313	0	0	0	0	0	0	0.0550708	0.0141585	0.015214	0.0566272	0.062918	0.173699	0.0374221	0.0169379	0.0171252	0.0233164	0.0957607	0.079458	0.0182602	0.382023	0.307843	0.070276
		High affinity K+ transporter 5	88 kDa	No	Plasma Membrane	0.95	GLYMA_19G263100	4.59239	3.01881	0.271807	0	1.97985	0	0	0.219187	0.419185	1.20327	0.833702	3.35059	14.819	16.1343	9.15803	0.678981	0.569315	1.24259	1.76706	0.920625	1.08761	0.892405	1.05857	0.990069	1.64758	0.609096	0.884798
		Histone H2A 10	14 kDa	No	Nucleus	1	GLYMA_01G022100	0	0	0	0	0.0219512	0	0	1.83072	1.77308	0.0250701	0	0.160131	0.0998488	0.0609808	0.0979864	0.383362	0.516142	0.0859913	0.0686608	0.0937444	2.37913	1.77724	1.27576	3.91608	2.01345	0.456376	5.44127
		Inorganic H pyrophosphatase family protein	81 kDa	Yes	Endomembrane System	0.49	GLYMA_07G028500	0	0	0	0	0	0	0	0	0	0.00982072	0	0.0829934	0.0255854	0.0216709	0	0.40167	0.292725	0.123882	0.0652252	0.03517	0.32759	0.217128	0.210173	0.154219	0.149576	0	0.0953884
		Inorganic H pyrophosphatase family protein	81 kDa	No	Endomembrane System	0.53	GLYMA_08G214300	0.0602231	0	0	0.646842	0	0	0	0.0295573	0.39289	0	0	0.0642219	0.0300213	0.0379115	0.0339965	0.247731	0.16963	0.0856659	0.0542905	0.00799614	0.00307473	0	0.0166258	0	0.0273188	0	0.142519
		Insulinase (Peptidase family M16) family protein	112 kDa	No	Nucleus	1	GLYMA_03G137100	0.791197	0.674575	0.931909	0	0.591388	0.544592	0.711497	0.256636	0.448112	0.344527	0.605364	1.46395	1.15825	1.5728	0.843298	1.05887	0.998538	1.26932	1.24058	1.18567	0.351043	0.158365	0.561588	1.25497	0.199419	0.299152	0.187683
		Integral component of membrane	58 kDa	No	Plasma Membrane	0.97	GLYMA_15G199800	2.75044	1.92267	3.36019	0.682221	2.88092	3.70307	1.94707	0.254237	0	2.80875	1.30692	1.14698	0.502522	2.67522	6.17274	1.45398	0.841956	1.0656	0.70879	0.664426	0.145034	0	0.207506	0.206698	0.39555	1.99225	0.0715078
		YELLOW STRIPE like 7 /Integral membrane	78 kDa	Yes	Plasma Membrane	0.95	GLYMA_16G212900	0.306003	0.0734794	0.130685	1.22888	0.561487	0	0	0.0431503	0.169741	0.168079	0.182627	0.59278	0.950959	0.209257	0.535455	0.275444	0.138685	0.61826	0.762176	1.06443	0.0353377	0.0323135	0.119946	0.163491	0.0701068	0.0485774	0.0747128
		Late embryogenesis abundant (LEA) hydroxyproline-rich glycoprotein family	25 kDa	Yes	Endomembrane System	0.75	GLYMA_03G201000	1.21309	0.5999	0.668903	3.85799	0.331497	0	0	1.0647	4.13357	0.56272	0.376307	0.602076	0.0684463	0	0.165889	0.00897353	0	0.0150521	0.0202872	0.0135737	0.115996	0	0.126176	0.101617	0.351561	0.127681	0.156864
		Leucine-rich receptor-like protein kinase family protein	109 kDa	No	Anchored Component Of Plasma Membrane	0.55	GLYMA_06G090800	0.940076	2.53382	1.93227	0	3.3805	0	0	0.251189	0.736224	1.9742	1.43254	0.750838	0.723624	0.155727	0.491533	0.257115	0.189607	0.335006	0.778347	0.787354	0	0	0.0169907	0.014474	0.0121854	0	0.0446184
		Leucine-rich repeat protein kinase	71 kDa	Yes	Plasma Membrane	0.92	GLYMA_17G119800	0.123873	0.252998	0.289026	0	0.102777	0	0	0	0	0.345431	0.0947915	0.068741	0.0302602	0.00826707	0.0121962	0.23723	0.165266	0.0209359	0.0824606	0.0183843	1.91836	0.896803	1.01131	1.94303	1.52857	0.562512	1.05609
		Leucine-rich repeat protein kinase	72 kDa	No	Plasma Membrane	0.88	GLYMA_02G237000	0.0457161	0.0825451	0.71467	0	0.113924	0	0	0	0.0163982	0	0	0.0188992	0.0119001	0	0.0366203	0.132499	0.181386	0.0150571	0.037485	0.0120476	0.0472012	0	0.0692329	0.0124873	0.0464399	0.0670403	0.0334209
		Leucine-rich repeat protein kinase family protein	71 kDa	No	Plasma Membrane	0.93	GLYMA_05G011600	0.150014	0.288098	0.258053	0	0.195597	0	0	0.0305799	0.0635276	0.404497	0.430844	0.0353676	0.0550643	0.0878914	0.0894087	0.113442	0.114826	0.0296387	0.0969941	0.0199967	2.04629	0.160334	0.100698	0.162808	0.115706	1.92412	0.361785
		Leucine-rich repeat protein kinase family protein	99 kDa	No	Plasma Membrane	0.89	GLYMA_15G021800	0.101181	0	0	0	0	0	0	0.0284298	0	0.00704406	0	0.0106551	0.471107	0	0.0875994	0	0.00799624	0	0	0.0149884	0.0104171	0.0695985	0.155161	0.0990804	0.0112108	1.01222	0.34101
		Leucine-rich repeat transmembrane protein kinase	110 kDa	Yes	Plasma Membrane	0.88	GLYMA_13G266100	4.22001	2.83847	1.47837	0	0.129572	0.243144	0.0898037	0.144994	0.303494	0.157387	0	6.71436	5.64957	4.5593	2.68366	1.27749	0.887822	6.0611	6.40755	8.9157	0.269391	0.162182	0.133128	0.111718	0.104374	0.258779	0.166251
		Lipid phosphate phosphatase 2	36 kDa	No	Plasma Membrane	0.86	GLYMA_10G270000	0.0349478	0.0173606	0.130959	0.724795	0	2.72131	2.77397	0.11154	0	0.431183	0.0963547	0.0753498	0.0898965	0.206902	0.0508963	0.268915	0.391164	0.063804	0.149889	0.0409732	1.66839	2.27413	1.56526	1.27223	1.8895	1.93541	1.17386
		Lipoxygenase/Metal ion binding	98 kDa	No	Cytoplasm	0.7	GLYMA_20G144600	0.635694	0.578342	1.27076	0	0.0386739	0.0205688	0.072082	0.118725	0.438125	0.114541	0.0314851	0.288424	0.200339	0.0187169	0.275096	0.150362	0.0669959	0.222983	1.04571	0.614763	0	0	0.00427464	0	0	0	0
		Lipoxygenase/Metal ion binding activity	51 kDa	No	Chloroplast	1	GLYMA_10G249100	0	0	0	0	0	0	0	0	0	0	0	0.142949	0.138494	0.0454833	0.056503	0.0770652	0.120352	0.0529404	0.037561	0.0131749	0.00752011	0	0	0	0.0185845	0	0
		LMBR1-like membrane protein	56 kDa	No	Endomembrane System	0.89	GLYMA_18G200800	0.0566567	0.0268658	0.145169	0	0.202342	0.119299	0.108673	0.0254773	0.0530324	0.0274406	0.259456	0.169786	0.131478	0.137904	0.421721	0.238146	0.477342	0.144261	0.229943	0.143819	0.0164075	0.0196284	0.028353	0.0116322	0.0102291	0.0732939	0
		LMBR1-like membrane protein	56 kDa	No	Endomembrane System	0.9	GLYMA_07G149900	1.21929	0.722075	1.50369	0	1.24187	1.4648	1.52538	0.0140232	0	1.12037	1.04948	1.18565	1.01242	2.43295	1.83195	1.8743	1.88858	1.18181	1.52268	1.14105	0.181131	0.0375871	0.268201	0.352595	0.283004	0.165526	0.545809
		Low-molecular-weight cysteine-rich 69	14 kDa	No	Extracellular Space	0.99	GLYMA_08G268000	0	0	0	0	0	0	0	0	0	0	0	0	0	0	0	0.0038289	0.106838	0.0148965	0	0	0.0099586	0	0.0370842	0.0319835	0.0823253	0	0.0114197
		Major facilitator superfamily protein, Suger transporter	57 kDa	No	Plasma Membrane	0.89	GLYMA_11G004800	0.763803	0.249544	0.233427	0	0.0495604	0	0	0.0250403	0.26095	0.0604271	0.0164799	0.21653	0.072668	0.148481	0.492381	0.0977561	0.0153284	0.0737025	0.0728325	0.00907178	0.208843	0.101764	0.304295	0.26063	0.301852	0.0829843	0.568833
		Membrane, integral component	25 kDa	No	Endomembrane System	0.75	GLYMA_11G213800	0.013512	0.0146201	0	0	0	0	0	0	0.0650889	0.0167847	0	0.192918	0.377371	2.62473	0.270389	0.332763	0.197476	0.464888	0.302261	0.650793	27.3655	3.48332	3.42638	13.6753	3.18594	3.00374	4.64464
		Membrane, integral component	50 kDa	No	Endomembrane System	0.98	GLYMA_16G161100	0.0870377	0	0	0	0	0	0	0	0	0	0	0.0211827	1.72431	0.0259055	2.78534	0.0289639	0.00399812	0.0901738	0.00342666	0.00216643	0.0752002	0.184799	0.417678	0.280186	0.0566308	3.23248	0.667344
		Membrane, integral component	58 kDa	No	Endomembrane System	0.93	GLYMA_01G009700	0.023221	0.0505217	0.119446	0	0.104605	0.100537	0.743357	0.157971	0.0810189	0.127577	0.0139487	0.00787447	0.00734009	0.0135068	0	0.149164	0.531632	0.032902	0.00440385	0	0.0255685	0.0118325	0.152581	0.0592289	0.0128967	0	0.107758
		Mercaptopyruvate sulfurtransferase 1	42 kDa	No	Mitochondrion	0.53	GLYMA_08G167100	0.0247628	0.0817666	0.141854	0	0.0310369	0	0	0.843028	0.530223	0.164465	0.0920808	0.169768	0.151195	0.18141	0.0693168	0.274238	0.198292	0.20091	0.240748	0.212213	0.00583491	0	0.00727382	0	0	0	0
		Metal ion bind/Lipoxygenase 1	96 kDa	No	Cytoplasm	0.7	GLYMA_13G347700	19.0436	45.2657	39.7292	3.86722	18.09	2.06841	1.43222	23.633	53.0273	29.1802	16.8851	5.6716	20.5619	6.02547	3.85617	12.1232	5.33517	5.04853	23.0907	27.4688	0.11767	0.0259415	0.141153	0.13102	0.0376625	0	0.12407
		Metal ion binding	52 kDa	No	Nucleus	1	GLYMA_U039300	0.0128523	0	0	0	0	0	0	0	0	0	0	0.220405	0.382298	0.0194725	0.275198	0.10179	0.176087	0.0470533	0.142229	0.0518671	0.0230298	0.0482211	0.0258173	0.0300922	0	0	0.0605864
		Mitochondrial HSO70 2	72 kDa	No	Mitochondrion	0.74	GLYMA_07G184300	0.0329054	0	0	0	0.111885	0	0.0656173	0.297515	0.0932892	0.0509828	0.042533	0.151006	0.0513746	0	0.0342929	0.285824	0.249304	0.0550679	0.0357682	0.0179027	0.133857	0.189836	0.114233	0.0775206	0.300602	0.301197	0.0240508
		MLP-like protein/Integral component of membrane	17 kDa	No	Cytoplasm	0.7	GLYMA_09G118300	0.107676	0	0	0	0	0	0	0	0	0	0	0.0247623	0.72881	0.020006	0.259587	0.0102736	0	0.0142087	0.0157887	0.00678308	0.25736	0.172003	0.215709	0.176886	0.262627	0.17408	0.197392
		Mov34/MPN/PAD-1/proteasome family protein	35 kDa	No	Nucleus	1	GLYMA_13G224700	0.0106023	0	0	0.666001	0.0275159	0	0	0.303089	0.69757	0.0992574	0.0370925	0.105105	0.0619787	0.0721053	0.0897713	0.0728382	0.168454	0.0821105	0.0788469	0.07504	0.108578	0.0150613	0.189544	0.166498	0.162303	0.345926	0.322746
		NDR1/HIN1-like 1/Integral membrane component	24 kDa	No	Endomembrane System	0.81	GLYMA_19G198900	0.0902358	0.039024	0	0	0.111608	0	0	0.339693	1.64743	0.106133	0.0882324	0.0238384	0.0548083	0.0566373	0	0.0450659	0.0158019	0.00337451	0.125834	0.0481741	0.202549	0.442116	0.331106	0.248853	0.122183	0.966468	0.489819
		NmrA-like negative transcriptional regulator family protein	36 kDa	No	Chloroplast	0.78	GLYMA_01G172600	0.422019	0.0212822	0	0	0	0	0	0.0643367	0.236044	0	0	1.24922	1.52104	0.189433	0.17551	0.118561	0.061975	0.396703	0.679045	0.321653	0.124889	0.246086	0.1026	0.115107	0.0750008	0.0355793	0.708026
		Novel plant snare 13/SNAP receptor activity	30 kDa	No	Endomembrane System	0.97	GLYMA_13G119900	0.0780887	0.0741155	0.249712	0.614439	0.287534	0.166266	0.214737	0.235191	0.473416	0.124341	0.053271	0.193146	0.203608	0.210949	0.723552	0.3342	0.303894	0.25852	0.209631	0.235566	0.116379	0.266008	0.194729	0.176916	0.0357502	0	0.134658
		N-terminal nucleophile aminohydrolases (Ntn hydrolases) superfamily protein	25 kDa	No	Cytoplasm	0.7	GLYMA_06G078500	0.0631571	0	0	0.770535	0.210648	0	0	1.04123	0.908027	0.208893	0.0538011	0.172083	0.117008	0.0607959	0.188909	0.241117	0.242103	0.158238	0.0930299	0.14819	0.0407117	0.0896512	0.016249	0.00480414	0.0457363	0	0
		N-terminal nucleophile aminohydrolases (Ntn hydrolases) superfamily protein	29 kDa	No	Cytoplasm	0.54	GLYMA_04G194700	0.108139	0.115602	0	0	0.25548	0.120295	0.0573056	0.520732	1.03693	0.0896289	0.0789393	0.34727	0.310681	0.205253	0.288766	0.463615	0.425121	0.264241	0.283365	0.208735	0.211819	0.379503	0.241439	0.198284	0.345145	0.287627	0.145652
		Nucleic acid-binding, OB-fold-like protein	16 kDa	No	Nucleus	1	GLYMA_03G254700	0.0117002	0	0	0	0.0924145	0	0	1.04754	0.764768	0.0663671	0	0.17128	0.12071	0.0266045	0.0891117	0.165501	0.185076	0.203343	0.119179	0.143637	0.130159	0.287799	0.142138	0.0768761	0.702312	0.550527	0.123766
		Oligopeptide transporter	83 kDa	No	Plasma Membrane	0.89	GLYMA_07G267800	0.0668705	0	0	0	0.333235	0	0	0.0688574	0.181357	0.127525	0.171036	0.713836	0.0855343	0.119586	0.163032	0.156059	0.145669	0.32999	0.32559	0.276588	0.358015	0.874545	0.281365	0.129265	0.124685	0.428413	0.265204
		Oligopeptide transporter 7	84 kDa	No	Plasma Membrane	1	GLYMA_20G067300	0.0440157	0	0	0	0.0352085	0	0	0	0	0	0	0.0400786	0.197347	0.029938	0.0528821	0.0853342	0.0364726	0.0579319	0.452704	0.0766692	0.00358217	0	0.00108788	0	0	0	0
		PAM domain (PCI/PINT associated module) protein	56 kDa	No	Nucleus	1	GLYMA_04G021500	0.0115927	0	0	1.45855	0.0285973	0	0	0.135145	0.132007	0.00930938	0	0.229812	0.13979	0.237974	0.25583	0.304218	0.262948	0.11032	0.192617	0.158663	0.0507732	0.163187	0.0649171	0.0345627	0	0	0.027644
		Peptide transporter 2	65 kDa	No	Plasma Membrane	0.89	GLYMA_08G091600	0.00488704	0.0470952	0	0	0.0481894	0.422321	0.45786	0	0	0.021584	0.0325901	0.16961	0.406765	0.350723	1.13789	0.173753	0.125584	0.176805	0.164303	0.147457	0.141401	0.213476	0.0388514	0.0215076	0.0464475	0	0.0676908
		Peptide transporter 3	66 kDa	No	Plasma Membrane	0.93	GLYMA_10G183900	1.24711	2.3703	1.45517	0	0.033641	0	0	0.0355604	1.28218	0.561704	0.462615	2.24651	2.25267	0.102128	0.543425	0.341008	0.150991	1.10314	1.51659	2.19082	0.0136166	0	0.000343165	0	0	0	0
		Phosphate transporter 1;3	58 kDa	No	Plasma Membrane	0.87	GLYMA_10G006700	0.916416	0.0313517	0	0	0	0.00167138	0.0562844	0	0	0.0493604	0	0.00825823	0.232422	0.322045	0.604904	0.00960166	0	0	0	0	0.205908	0.418722	0.326547	0.249182	0.219711	0.0355793	0.719693
		Phosphate transporter 1;7	59 kDa	No	Plasma Membrane	0.93	GLYMA_03G162800	0.488793	0.031218	0	0	0.0527254	0	0	0	0.47444	0.0249886	0	0.258619	0.37294	0.753364	0.253829	0.0573283	0.0377119	0.0369455	0.0822011	0.0552581	0.959197	0.692233	0.589698	0.458228	1.42115	0.592713	0.391501
		Phosphate transporter 1;7	59 kDa	No	Plasma Membrane	0.93	GLYMA_10G186500	0.372586	1.62981	0.991176	0.702346	0.0385223	1.61368	1.40437	0.484409	0.737446	2.248	0.979524	0.449199	0.598017	0	0.18353	0.066198	0	0.135378	0.299404	0.203933	0.446539	0.310121	0.656625	1.00123	0.528945	0.0648003	0.386733
		Phosphate transporter 1;7	58 kDa	No	Plasma Membrane	0.96	GLYMA_02G005800	0.00842049	0	0	0	0	0	0	0	0	0	0	0.023936	0.241245	0.393066	0.0467664	0	0.0190205	0	0	0	0.102266	0.117526	0.0919557	0.0797666	0.162986	0.279771	0.0677887
		Phosphoglycerate mutase, 2,3-bisphosphoglycerate-independent	61 kDa	No	Cytoplasm	1	GLYMA_09G270500	0.401969	0.123759	0.517037	0.702346	0.517623	0	0	1.29383	2.38393	0.203013	0.0583914	0.808896	0.607212	0.272874	0.314513	0.458564	0.285392	0.235917	0.213762	0.190722	0.0711267	0.103174	0.105525	0.0658709	0.292652	0	0.0648658
		Phospholipase C 2	69 kDa	No	Chloroplast	1	GLYMA_14G059200	1.80468	1.19712	0.528457	2.55707	0.280026	0.0270166	0	0.334057	0.738282	1.12432	0.41493	0.532248	0.50016	0.450741	0.331648	0.75834	0.62396	0.315893	0.756349	0.497825	0.749907	0.519826	0.699076	0.43878	0.831038	0.917777	0.281559
		Phospholipase D alpha 1	92 kDa	Yes	Nucleus	1	GLYMA_13G364900	0.0691032	0.0195506	0	0	0.0219512	0.554581	0.246119	0.0590839	0.267349	0.0449179	0	0.884435	1.37776	0.269597	0.482904	0.402203	0.284968	0.647455	0.839967	0.493165	0	0	0	0	0	0	0
		Phospholipase D alpha 1	59 kDa	No	Nucleus	1	GLYMA_08G211700	0.634027	0.202501	0.424616	0.770535	0.0706412	0	0	0.0776791	0.116365	0.0844432	0	0.177443	0.109097	0.28852	0.04657	0.159934	0.215883	0.13575	0.146016	0.124168	1.22971	1.03266	1.30726	1.09886	0.890642	0.567839	1.58494
		Phospholipase D delta	98 kDa	Yes	Nucleus	1	GLYMA_11G081500	0.0120734	0.0978417	0	0	0.403165	0.0448982	0.0332976	0	0	0.102086	0.0635113	0.0861865	0.118306	0.275483	0.149126	0.14867	0.138093	0.086965	0.116111	0.0589817	0.247413	0.204759	0.504458	0.404344	0.355454	0.637658	0.33041
		Phospholipase D delta	98 kDa	Yes	Nucleus	1	GLYMA_01G162100	0.33922	0.977124	0.619214	0	0.304222	0.391179	0.453375	0.0908508	0.137795	1.39724	1.37955	0.337449	0.427524	0.476735	0.976201	0.552727	0.512376	0.531833	0.400899	0.496326	0.158133	0.0567252	0.0801608	0.0684447	0.161754	0.067891	0
		phytochrome and flowering time regulatory protein (PFT1)	89 kDa	No	Nucleus	1	GLYMA_01G086201	0	0	0	0	0	0	0	0	0	0	0	0	0	0	0	0	0	0	0	0	0.0303755	0.0756287	0.0469398	0.0310613	0.0040683	0	0.141172
		PLAC8 family protein	28 kDa	No	Nucleus	1	GLYMA_08G016600	0.17251	0.55203	0.401122	0.724795	0.413247	2.41094	2.73424	0.218278	0.710281	0.234885	0.425528	2.18538	2.0167	0.915986	4.41938	1.43092	1.58827	1.24253	1.04005	1.07029	0.349996	0.0798753	0.320165	0.479046	0.280178	0.0162229	0.297504
		PLANT CADMIUM RESISTANCE 2	20 kDa	No	Extracellular Space	0.76	GLYMA_05G236300	1.74681	3.48346	1.68093	0	0	0	0	0.132071	1.87632	0.45496	0.0280596	0.811433	0.417828	0.767509	1.0747	0.20578	0.20403	0.085817	0.165852	0.0786858	0.10233	0.0536754	0.12907	0.164056	0.125532	0.154694	0.0795049
		Plant intracellular ras group-related LRR 4	61 kDa	No	Nucleus	1	GLYMA_09G196300	0.326577	1.07413	0.755407	0.509295	0.388945	0.0476369	0	0.249302	0.0743384	0.301998	0.115664	0.214554	0.116848	0.0299814	0.225024	0.0446598	0.0820861	0.0772397	0.0548613	0.0819345	0.0816409	0	0.174814	0.108364	0.00747617	0.0599891	0.24861
		Pleiotropic drug resistance 9	163 kDa	No	Plasma Membrane	1	GLYMA_07G233900	0.42109	0.311487	0.467857	0	0.0882647	0	0.0186343	0	0.0285147	0.0372069	0	0.950536	0.601391	0.224871	0.247977	0.211015	0.430657	0.32513	0.38223	0.264317	0.0714376	0	0.125763	0.139449	0.0260914	0	0.202532
		Polyol/monosaccharide transporter 5	57 kDa	No	Plasma Membrane	1	GLYMA_11G119500	4.48159	10.2126	2.19436	0	0.563658	0.439611	0.252567	0.745434	3.31328	9.74176	7.45812	2.78076	2.41888	0.469607	0.883089	1.12573	0.620851	3.99439	3.49746	2.91768	0.0910696	0.108701	0.0749643	0.0547844	0.0102291	0	0.200285
		Porin/Voltage dependent anion channel 1	30 kDa	No	Nucleus	1	GLYMA_18G125500	0.105751	0.028905	0.362556	0	0.241549	0.0603859	0	0.668576	1.72892	0.207434	0.0381014	0.156821	0.138108	0.208091	0.157542	0.219709	0.203286	0.122514	0.0868306	0.077294	0.199361	0.558681	0.179792	0.167729	0.150435	0.0355793	0.278686
		Porin/voltage dependent anion channel 1	30 kDa	No	Nucleus	1	GLYMA_09G240600	0.3667	0.0227489	0.139353	1.39441	0.026371	0.162316	0.32193	2.94239	1.35203	0.633392	0.151428	0.0948705	0.0748611	0.0181605	0.121961	0.339872	0.229303	0.0849657	0.0999503	0.075705	2.50196	1.25878	0.800156	1.44585	0.293016	1.31951	1.6475
		Porin/Voltage dependent anion channel 1	30 kDa	No	Nucleus	1	GLYMA_08G296700	0.0249847	0	0	0	0	0	0	0.676793	0.633525	0.127915	0.0700345	0.0841584	0.100743	0.105347	0.0110596	0.13635	0.0804867	0.0482326	0.0939705	0.0642396	0.0725752	0.0999167	0.297348	0.0556604	0.855446	0	0.12078
		Porin/Voltage dependent anion channel 1	30 kDa	No	Nucleus	1	GLYMA_13G064900	0.0333471	0.0278743	0	0	0.126255	0.0327354	0.0938084	0.22068	0.0946956	0.0342676	0.0819356	0.0810902	0.0625545	0.0247574	0.0840252	0.110254	0.0691084	0.0303866	0.0734277	0.0350384	0.207479	0	0.14043	0.155847	0.206727	0.269321	0.246484
		Porin/Voltage dependent anion channel 2	29 kDa	No	Nucleus	1	GLYMA_01G193700	0.293325	0.260794	0.388619	1.58618	0.0712582	0	0	0.354684	0.659626	0.0311285	0.0180855	0.153966	0.153565	0.172221	0.0830035	0.215807	0.193943	0.156259	0.14089	0.0989136	0.0219817	0	0.0194608	0.0378745	0.0148251	0.0449798	0.117094
		Predicted AT-hook DNA-binding family protein	29 kDa	No	Extracellular Space	0.67	GLYMA_05G111500	0.708164	0.218131	0.92508	0	0.829107	0.721543	0.478181	0.285197	0.275213	0.110867	0	0.786232	1.58108	0.187831	0.296606	0.926319	0.663777	1.23178	1.34867	2.25457	0.338849	0.617599	0.444476	0.403576	0.455256	0.693753	0.315985
		Proline extensin-like receptor kinase 1	71 kDa	No	Endomembrane System	0.94	GLYMA_07G085600	0.406276	0.201261	0.214568	1.19094	0.0583174	0	0	0	0.417612	0.170078	0.0662264	0.145487	0.055763	0.701732	0.636175	0.261372	0.417954	0.130509	0.174805	0.0791606	0.127545	0	0.19063	0.0952942	0.302123	0.102052	0.217073
		Proteasome alpha subunit A1	27 kDa	No	Cytoplasm	0.7	GLYMA_06G254200	0.0670652	0.0345188	0	2.54393	0.206956	0.0277485	0	1.19502	1.26795	0.286909	0.17479	0.101243	0.0723553	0.169591	0.102154	0.216179	0.326231	0.212067	0.100022	0.0934066	0.170775	0.209783	0.277092	0.162605	0.464372	0.433026	0.478756
		Proteasome alpha subunit C1	27 kDa	No	Cytoplasm	0.7	GLYMA_18G206200	0.0323292	0	0	0	0.123932	0.0165147	0.0425351	0.219767	0.110047	0.0240527	0.036729	0.00983881	0.0386249	0	0.028645	0.0685345	0.0651832	0.0678763	0.0100488	0.0189878	0.532606	0.58401	0.738076	0.52389	0.470079	1.53639	0.58548
		Proteasome alpha subunit E2	26 kDa	No	Nucleus	0.94	GLYMA_02G013600	0.475408	0.520115	0.392318	0	0.47043	0.647523	0.641447	0.645894	0.294763	0.338311	0.516803	0.503514	0.379091	0.184919	0.449879	0.323268	0.328412	0.229103	0.358152	0.219725	0.0865452	0.180341	0.0987772	0.111506	0.0525693	0.121662	0.112637
		Proteasome component (PCI) domain	45 kDa	No	Nucleus	1	GLYMA_17G127100	0.0744493	0.0623824	0.113225	0.697204	0.0261603	0	0	0.905595	0.854818	0.107074	0.153472	0.188858	0.15762	0.0833148	0.179863	0.265099	0.165405	0.239101	0.0829737	0.138085	0.206309	0.164589	0.408371	0.39395	0.230122	0.723711	0.363465
		Proteasome component (PCI) domain protein	44 kDa	No	Nucleus	1	GLYMA_09G210000	0.100055	0.0507993	0	0.492441	0.265033	0	0	0.557426	0.979223	0.0316784	0.0237914	0.228228	0.219453	0.0585645	0.294159	0.300661	0.207396	0.176341	0.169609	0.131108	0.253584	0.347767	0.309398	0.351471	0.476504	0.410729	0.337372
		Proteasome regulatory subunit S2 1A	97 kDa	No	Nucleus	1	GLYMA_12G117600	0.0530062	0.0713483	0.150124	0	0.328736	0.358572	0.208409	0.244282	0.755586	0.0885351	0.0571312	0.499532	0.513838	0.505981	0.5046	0.795144	0.777624	0.680908	0.396989	0.420822	0.286778	0.351007	0.364415	0.349139	0.415848	0.22143	0.419898
		Proteasome subunit alpha	27 kDa	No	Cytoplasm	0.7	GLYMA_01G124900	0.0114871	0.0147341	0.289294	0.492441	0.152038	0.0885397	0.222995	1.08103	0.837997	0.114643	0.0477686	0.149499	0.0811163	0	0.0580238	0.110847	0.0641967	0.104595	0.0926351	0.0917382	0.16853	0.358338	0.216519	0.161898	0.128618	0.408572	0.140481
		Proteasome subunit PAB1	26 kDa	No	Cytoplasm	0.67	GLYMA_08G167600	0.0102714	0.0474236	0.0906742	0	0.102993	0.250389	0.162944	0.674073	1.02843	0.0148327	0	0.358878	0.237221	0.199838	0.205785	0.393075	0.367695	0.4569	0.335478	0.221979	0.0678887	0.239995	0.0160017	0.0136316	0.0176757	0	0.106837
		Proteasome-activating ATPase	48 kDa	No	Plasma Membrane	0.79	GLYMA_03G262800	0.288928	0.151027	0.253876	0	0.147978	0.358371	0.313979	0.205466	0.319094	0.17826	0.0557026	0.292104	0.27059	0.566957	0.349783	0.329233	0.368934	0.194944	0.320001	0.247625	0.251309	0.61822	0.694966	0.334953	0.148316	0.273589	0.279031
		Proteasome-activating ATPase	47 kDa	No	Cytoplasm	0.7	GLYMA_07G002200	0.179337	0.0361132	0.406133	0	0.218093	0.442104	0.33179	1.28812	1.04505	0.339831	0.151685	0.585464	0.323775	0.339121	0.401381	0.486403	0.488594	0.386752	0.292365	0.291912	0.243387	0.392779	0.348783	0.398118	0.231859	0.515957	0.646238
		proteasome-activating ATPase	47 kDa	No	Cytoplasm	0.7	GLYMA_11G199900	0.0901422	0	0	0	0.0778268	0.0299401	0.0451552	0.115179	0.191048	0.0870525	0.0135135	0.156853	0.12862	0.19289	0.206192	0.257152	0.23095	0.175041	0.12883	0.100175	1.27937	0.707354	0.96314	1.40342	0.938841	1.06378	0.841486
		Protein kinase family protein	70 kDa	No	Plasma Membrane	0.94	GLYMA_11G223200	0.298783	0.209434	0	0	0	0	0	0.0583168	0.0642013	0.39802	0.260027	0.243278	0.568399	0.40196	1.31033	0.0963718	0.0129068	0.0754327	0.104312	0.0621829	0.140606	0.0751445	0.138618	0.0771131	0.176585	0	0.158993
		Protein kinase protein with tetratricopeptide repeat domain	56 kDa	No	Nucleus	1	GLYMA_12G058100	0.384304	0.312887	0	0	0.241742	0	0	0	0	0.00774398	0	0.278979	0.174732	0.141997	0.0584628	0.370281	0.389338	0.245309	0.304785	0.249799	0.0546588	0.21075	0.0888069	0.0795617	0.0262102	0.184498	0
		Protein kinase superfamily protein	40 kDa	No	Nucleus	1	GLYMA_10G295700	0.149945	0.0392108	0.182294	0.682221	0.387475	0.396688	0.36921	0.359865	0.366083	0.142687	0.0734846	0.405215	0.463071	0.426289	0.725803	0.276782	0.199435	0.489709	0.355417	0.42784	0.0373342	0	0.0485332	0.0241494	0.0040683	0	0.0446875
		Protein kinase superfamily protein	131 kDa	No	Nucleus	1	GLYMA_09G169500	0.119449	0.209389	0.211677	0.76929	0.324952	0.851737	0.80469	0.0356318	0.0701538	0.452338	0.637033	0.679362	1.02741	0.545148	0.790737	0.798935	0.85947	1.60705	0.960036	2.11273	3.79378	1.72654	0.394548	0.568553	0.27895	0.388778	0.755461
		Protein of unknown function (DUF1218)	22 kDa	No	Endomembrane System	0.78	GLYMA_14G131700	0.419562	0.533042	0.357226	0	0.0584281	0.0132213	0	0.545598	0.345885	0.172406	0.0906208	0.151756	0.187292	0.337073	0.464228	0.143903	0.10224	0.188339	0.138394	0.185185	0.321153	0.203023	0.375277	0.341012	0.297136	0.0483683	0.932879
		Protein phosphatase 2C family protein	30 kDa	No	Nucleus	1	GLYMA_08G178800	0.506664	0.0636744	0	0	0.0701813	0.505194	0.448341	0.2968	0.259818	0.198741	0.171224	0.173924	0.162154	0.403983	0.506853	0.0704298	0.0396337	0.178859	0.124842	0.064733	0.0794117	0.240764	0.0863196	0.0430589	0.117844	0	0.0658831
		Quinone reductase family protein	27 kDa	No	Cytoplasm	0.7	GLYMA_11G120200	0.450215	0.0741727	0	0	0	0	0	0	0	0	0	0.372568	0.76463	1.73017	1.05894	0.106963	0.0543704	0.0932727	0.332567	0.232158	0.40138	0.210981	0.425219	0.369728	0.322945	0.524124	0.40092
		Quinone reductase family protein	22 kDa	Yes	Extracellular Space	0.8	GLYMA_13G249600	1.1628	0.119501	1.04934	0	0	0	0	0.219237	2.01296	0	0	1.52569	8.9361	17.2217	3.48975	0.924517	0.0861205	1.16717	5.76039	3.49839	0.406929	0.281261	0.553118	0.473278	0.691677	0.3545	0.66553
		RAB GTPase homolog A2B	24 kDa	No	Nucleus	1	GLYMA_11G135400	0.272481	0.110804	0	0	0	0.213208	0.247063	0.132681	0.469466	0.0602716	0	0.333055	0.332319	0.533936	0.360754	0.345138	0.225448	0.374807	0.391978	0.209326	0.323274	0.312687	0.313181	0.2868	0.486726	1.01719	0.470319
		RAB GTPase homolog A5D	24 kDa	No	Nucleus	1	GLYMA_08G361000	0	0	0	0	0	0	0	0.0818263	0.422431	0	0	0.0454772	0.0373375	0.287531	0.00588354	0.158091	0.0829033	0.0177094	0.0612004	0.0308406	0.0163334	0	0.0501391	0.0200189	0.29135	0.0355793	0.0438305
		RAB GTPase homolog G3F	23 kDa	No	Nucleus	1	GLYMA_11G118800	0.19445	0.115295	0.0908637	0	0.0373505	0	0	0.724245	1.00903	0.214927	0.0280131	0.523397	0.456465	0.468817	0.374274	0.524354	0.278934	0.527615	0.394188	0.474816	0.0394073	0	0.0744198	0.0491628	0.19313	0.16017	0
		Ras-related small GTPase	24 kDa	No	Nucleus	1	GLYMA_11G142300	0.502819	0.300482	0.553046	0	0.431114	0.778555	0.920946	0.779537	0.437282	0.423813	0.105673	0.500158	0.371774	0.615013	0.48905	0.718569	0.548549	0.391027	0.474223	0.308061	0.140254	0.0771355	0.0524589	0.0607869	0.274882	0.0993453	0.0190591
		Ras-related small GTPase	24 kDa	No	Nucleus	1	GLYMA_18G287600	0.310064	0.354414	0.71326	0	0.281892	0	0	0.387381	0.160433	0.090532	0.114784	0.713685	1.10601	0.557506	1.12223	0.33374	0.179894	0.669587	0.487594	0.726417	1.02319	0.783753	2.3596	3.19006	0.502215	2.19634	4.06139
		Receptor-like kinase 1	70 kDa	Yes	Plasma Membrane	0.9	GLYMA_02G244400	0.0234627	0.0417085	0.269275	1.6416	0.037209	0.351743	0.521122	0.0559293	0	0.0696483	0.0277371	0.0111199	0.0201206	0.125594	0.0202896	0.0381438	0	0.0241367	0.028722	0.0491091	0.9365	2.82904	0.933538	1.12224	4.97424	0.607257	1.94499
		Receptor-like kinase 1	71 kDa	No	Plasma Membrane	0.92	GLYMA_05G247300	0.0778168	0	0	0	0	0	0	0.0142149	0.16898	0	0	0.0189165	0.0127377	0.370743	0.147628	0.200989	0.193252	0.0239116	0.100231	0	0.42068	0.22556	0.382015	0.425073	0.165785	0.062654	0.134081
		Remorin family protein	22 kDa	Yes	Nucleus	1	GLYMA_07G073100	2.64554	0.272509	0.23725	0	1.84792	0	0	0.222221	0.564391	0.660436	0.224398	0.740246	0.750711	1.92388	1.6959	1.11394	1.43429	0.963252	2.0871	1.81443	1.72509	0.393607	0.697614	0.574415	0.506791	0.164632	0.264714
		Remorin family protein	22 kDa	Yes	Nucleus	1	GLYMA_16G189500	0.0290648	0	0	0	0.0708337	0	0	0	0	0	0	0.847663	2.67606	0.181463	1.32972	0.370951	0.408328	2.14993	0.930331	1.9538	0.107415	0.027513	0.206478	0.170402	0.336857	0.113392	0.0792352
		Respiratory burst oxidase/ Calcium ion binding	77 kDa	No	Endomembrane System	0.91	GLYMA_10G152200	4.71696	3.28519	3.21493	1.324	1.0927	0.806102	0.41517	0.478937	0.530631	4.12892	3.36415	1.57184	1.45029	0.15138	0.284122	0.210867	0.304372	0.509619	0.775825	0.455129	0.253948	0.209174	0.400735	0.277834	0.172887	0	0.489675
		Respiratory burst oxidase/ Calcium ion binding	101 kDa	No	Endomembrane System	0.91	GLYMA_20G236200	8.42259	6.93107	4.34147	0.682221	1.95845	1.01091	0.698067	0.593084	0.880453	4.44013	6.23209	2.27838	1.52971	0.136854	0.630345	0.306967	0.156579	1.35816	0.818646	0.893763	0.0837606	0.103174	0.147056	0.0626404	0.0314145	0.200205	0.254643
		Respiratory burst oxidase/Calcium ion binding	101 kDa	No	Organelle Membrane	0.69	GLYMA_08G005900	2.99475	1.27711	2.00442	0	0.464013	0	0	0.135591	2.60883	0.214024	0.0598045	0.52628	0.575259	0.403523	0.640217	0.935833	0.667876	0.263565	1.98121	0.466097	0.115064	0	0.19726	0.101866	0.0267203	0	0.251816
		RETICULATA-like	40 kDa	No	Mitochondrion	0.86	GLYMA_09G227100	0	0.165195	0	0	0.222645	0.0938117	0.0223353	0.601464	0.436586	0.402749	0.0939605	0.0923706	0.0479149	0.0784628	0	0.142622	0.145776	0.0582291	0.123308	0.0595534	0.268377	0.245861	0.459797	0.34361	0.216197	0.22563	0.285805
		Ribosomal protein L10 family protein	34 kDa	No	Endomembrane System	0.94	GLYMA_14G061100	0	0	0	0	0	0	0	2.33172	1.95264	0	0	0.385231	0.0963454	0.0907034	0.219597	0.876692	0.989412	0.20123	0.165399	0.135725	2.15051	0.978458	1.44333	1.22567	1.29407	0.491431	0.681839
		Ribosomal protein L14	20 kDa	Yes	Chloroplast	0.74	GLYMA_02G004100	0	0	0	0	0	0	0	1.45447	1.39965	0.019867	0	0.165523	0.0464302	0.0176647	0.0555535	0.270608	0.409361	0.0776197	0.0644038	0.0896571	0.00687284	0	0.0231042	0	0	0.0886116	0.0472647
		Ribosomal protein L14p/L23e family protein	15 kDa	No	Chloroplast	1	GLYMA_03G166700	0.0763102	0	0	0.621659	0.2624	0	0	4.97276	4.78898	0.230362	0	0.228698	0.0607509	0	0.0074427	0.433891	0.353675	0.15604	0.0722727	0.068736	0.110854	0.0637444	0.150263	0.0934872	0.113127	0.256289	0.107508
		Ribosomal protein L18e/L15 superfamily protein	21 kDa	No	Nucleus	1	GLYMA_20G237400	0.0236954	0	0	0	0.0703835	0	0	2.55324	2.33122	0.0166791	0	0.427536	0.153888	0.131461	0.172369	1.14997	1.01436	0.316065	0.182714	0.146793	0.261049	0.140933	0.610278	0.356422	0.0630453	0.639401	0.225358
		Ribosomal protein L22p/L17e family protein	21 kDa	No	Nucleus	1	GLYMA_05G146800	0.760779	0.245663	0.384653	0	0.455436	0.294008	0.407953	1.65328	1.10415	0.473378	0.232522	1.20594	0.976908	0.879901	0.325457	3.3409	2.98904	0.822915	1.21117	0.543718	0	0	0	0	0	0	0
		Ribosomal protein L32e	16 kDa	No	Chloroplast	0.97	GLYMA_03G197500	0	0	0	0	0.0250591	0	0	0.12336	0.245404	0.0141622	0.0290377	0.0156206	0.00456636	0	0	0.0954253	0.128169	0.0201601	0	0.00274218	0	0	0	0	0	0	0
		Ribosomal protein L4/L1 family	45 kDa	No	Nucleus	1	GLYMA_13G136400	0	0.0119787	0	1.08175	0	0	0	1.90777	2.48342	0.163467	0	0.171296	0.0500881	0.150885	0	0.22775	0.235258	0.0972004	0.0309268	0.0494107	0.625792	0.820318	1.02956	0.777168	0.611779	0.440606	0.736456
		Ribosomal protein L6 family protein	26 kDa	No	Nucleus	1	GLYMA_08G151900	0.0107376	0	0	0	0.293401	0	0	1.59463	1.90765	0.0629648	0	0.592438	0.311634	0.282508	0.210315	1.17921	1.08151	0.293732	0.266536	0.189736	0.412608	0.311836	1.31313	0.556481	0.31003	0.250483	0.659904
		Ribosomal protein S11-beta	18 kDa	Yes	Chloroplast	0.57	GLYMA_13G165200	0	0	0	0	0	0	0	0	0	0	0	0	0	0	0	0	0	0	0	0	0.100023	0.049423	0.129325	0.0777989	0.0264651	0.106806	0.110341
		Ribosomal protein S13A	17 kDa	Yes	Chloroplast	0.55	GLYMA_05G052300	0	0	0	0	0	0	0	0	0	0	0	0	0	0	0	0	0	0	0	0	0.129767	0.172094	0.228837	0.187663	0.184258	0.121865	0.163672
		Ribosomal protein S3 family protein	26 kDa	No	Chloroplast	0.68	GLYMA_09G156600	0.666003	0.353524	0.623593	0.697204	0.751411	0.863519	1.03207	0.870058	0.852236	0.53272	0.636704	0.735743	0.536439	0.34967	0.46332	1.10039	0.814815	0.784332	0.546354	0.486771	0.165706	1.03774	0.299116	0.311545	0.146927	0.270869	0.189969
		Ribosomal protein S4 (RPS4A) family protein	30 kDa	No	Chloroplast	0.78	GLYMA_14G056900	0.123911	0.0079816	0	0	0	0	0	1.17098	2.58536	0.00886156	0	0.675237	0.239552	0	0.070344	1.54838	1.46527	0.274572	0.340764	0.197117	10.892	19.2751	11.68	7.15263	13.0804	10.5891	17.7589
		Ribosomal protein S5 family protein	30 kDa	No	Nucleus	1	GLYMA_02G085300	0.045899	0.0116107	0	0	0.0323131	0	0	2.05471	2.75153	0.0895658	0.040195	0.150684	0.0504235	0	0	0.27197	0.179714	0.129254	0.0382206	0.0507395	0.210286	0.174215	0.244951	0.254381	0.420122	0.240575	0.387132
		RNAhelicase-like 8	57 kDa	No	Chloroplast	1	GLYMA_03G013000	0.112644	0.10287	0	0.95938	0.220048	0.140236	0.195687	0.148131	0.186735	0.171241	0.086793	0.160262	0.148229	0.255337	0.205652	0.219923	0.16519	0.263147	0.146609	0.15983	0.146033	0.0236615	0.19447	0.165269	0.0273188	0.306201	0.182681
		RPN8A/proteasome regulatory particle	35 kDa	No	Nucleus	1	GLYMA_11G227700	0.100382	0.0920008	0	0.621659	0.216661	0	0	0.445881	0.744477	0.132535	0.112679	0.232319	0.257972	0.0733008	0.292595	0.248779	0.35805	0.182729	0.190504	0.214659	0	0	0.0292715	0.0596736	0	0	0.108081
		Sec14p-like phosphatidylinositol transfer family protein	70 kDa	No	Nucleus	1	GLYMA_12G001800	4.92335	11.9754	10.6929	2.00347	3.91038	0	0	0.0354449	0.372071	6.52331	5.04489	15.904	31.916	29.2123	42.729	10.9088	10.9683	28.3	18.7163	28.5104	0.165326	0.0510066	0.281861	0.112398	2.1357	0	0.24739
		SNF7/vacoular transport	24 kDa	No	Nucleus	1	GLYMA_01G004500	0.0357027	0	0.25362	0	0.340296	0.148772	0.0686147	0.541156	1.00287	0.150077	0.126804	0.279803	0.272144	0.239304	0.485786	0.23534	0.150267	0.402144	0.22465	0.232238	0.15757	0.107541	0.154115	0.18319	0.175259	0	0.189322
		Sodium symporters;urea transmembrane transporter	77 kDa	No	Plasma Membrane	0.95	GLYMA_04G123700	0.152648	0.0117919	0.138687	0	0	0	0	0	0.258468	0.00936676	0	0.875734	0.979608	0.172639	0.279664	0.304878	0.142613	0.562395	0.697925	0.767845	0.40397	0	0.0498997	0.0718423	0.0444753	0	0.247946
		SPFH/Band 7/PHB domain/Prohibitin/Flot-protein	31 kDa	Yes	Nucleus	1	GLYMA_17G097000	0.0932504	0	0.140706	0	0	0	0	0.0744225	0.109022	0.0560446	0.0407245	0.0850863	0.151814	0.0278716	0.99406	0.027023	0	0.024556	0.0290586	0.0233812	0	0.0282196	0.00209836	0.00759082	0	0	0
		SPFH/Band 7/PHB domain/Prohibitin/Flot-protein	32 kDa	Yes	Nucleus	1	GLYMA_19G020000	0.105666	0	0	0	0	2.61402	3.36652	1.00943	0.250946	0.112627	0	0.58369	1.02375	2.54092	3.16895	0.309575	0.347734	0.371461	0.285226	0.449294	0.0593705	0.383486	0.0739091	0.0657419	0.0535332	0	0
		SPFH/Band 7/PHB domain/Prohibitin/Flot-protein	32 kDa	Yes	Nucleus	1	GLYMA_13G065000	0.0474739	0	0	0.621659	0.313711	0.180076	0.30134	0.705748	0.845332	0.361254	0.814132	0.379464	0.336657	0.389867	0.390961	0.15153	0.0693832	0.239595	0.158795	0.078962	0.265532	0.108256	0.224882	0.102882	0.181365	0.178489	1.47503
		SPFH/Band 7/PHB domain/Prohibitin/Flot-protein	32 kDa	No	Nucleus	1	GLYMA_18G125600	0	0.679715	0.170259	0	0	0	0	0	0	0.816157	1.73943	0.0146924	0.0115505	0	0.0329158	0.103959	0.0789033	0.0439996	0.0193721	0.0204333	0.00890524	0	0.197248	0.0388167	0	0.365922	0.0331987
		Stress-induced gene H4	17 kDa	No	Cytoplasm	0.7	GLYMA_17G030200	0.215754	0	0	0	0	0	0	0	0	0	0	3.52917	3.42348	5.39462	3.51855	0.164989	0.0506542	2.13095	0.205179	0.194897	0.00793689	0	0.0527638	0.0308922	0	0	0
		Subtilisin-like serine protease 2	82 kDa	No	Plasma Membrane	0.88	GLYMA_12G031800	0	0	0	0	0	0	0	0.0173562	0	0.0280937	0	0.0229389	0.00768349	0.00877544	0	0.0425898	0.0542816	0	0.0486005	0.0109574	0.022418	0.149039	0.230012	0.0215865	0.103524	0	0.105365
		Sugar transporter 1	57 kDa	No	Plasma Membrane	0.97	GLYMA_08G059700	1.20334	0.669045	0.287552	0	4.01645	0	0	0.141396	0.207628	1.08009	1.46689	0.92445	0.754081	0.264028	2.53024	0.203965	0.314086	1.96219	0.223438	0.294887	0.454894	0.404384	0.467153	0.500798	0.350702	0.360558	0.208609
		Sugar transporter 1	56 kDa	No	Plasma Membrane	0.98	GLYMA_02G124100	0	0	0	0.666001	0	0.14957	0.123647	0.203536	0	0.052088	0.0397975	0.0874607	0.0224258	0.0437919	0.0455782	0.0565758	0.0366408	0.0639182	0.0400569	0.0203361	0.385027	0.536475	0.562554	0.389093	0.310443	0.422889	0.394841
		Sugar transporter 14	56 kDa	No	Plasma Membrane	0.95	GLYMA_05G228400	0.0941882	0.0756587	0	0	0.0672416	0.116715	0.123136	0.178774	0.617684	0.0408917	0.117264	0.0101789	0.0181808	0.090016	0.0735313	0.0139712	0	0	0.039974	0.00292152	0.0398967	0.126391	0.0379976	0.0307591	0.07199	0	0
		Syntaxin of plants 131/SNARE	34 kDa	No	Endomembrane System	0.95	GLYMA_12G194800	0.200351	0.173499	0.318924	0.702346	0.0440757	0.0711822	0.0237705	0.0362692	0	0.269626	0.340815	0.282511	0.374237	0.686583	0.368698	0.410674	0.379119	0.400309	0.449984	0.653773	0.0465698	0.0471582	0.0983036	0.106703	0.149781	0	0.0524285
		Syntaxin of plants 131/SNARE	34 kDa	No	Endomembrane System	0.93	GLYMA_13G307600	0.0741338	0.154293	0.0635647	0	0.254112	0.149785	0.0655093	0	0.135125	0.123106	0.0602708	0.497664	0.426858	0.92193	0.356153	0.418324	0.334604	0.301089	0.528197	0.611477	0.118666	0.236246	0.282918	0.212326	0.111538	0	0.187333
		Syntaxin of plants 71/SNARE	30 kDa	No	Endomembrane System	0.94	GLYMA_19G180200	0.223911	0.0419682	0	0	0	0.0200318	0.00508474	0.103815	0.299983	0.0362375	0.0173606	0.0395284	0.0415314	0.171021	0.177937	0.136179	0.0384026	0.0219683	0.106743	0.0155969	0.0375202	0.0675817	0.198472	0.0430474	0.0921825	0.281166	0.0861064
		Syntaxin of plants 71/SNARE	30 kDa	No	Endomembrane System	0.9	GLYMA_10G051400	0	0	0	0	0	0.0242758	0.0363573	0.182026	0.115224	0.0185289	0.0669709	0.0750852	0.102996	0.232578	0.027362	0.12845	0.20638	0.236059	0.159104	0.115413	0.293249	0.358492	0.706524	0.361954	0.425787	0.195572	0.199494
		T-complex protein 1 alpha subunit	59 kDa	No	Cytoplasm	0.7	GLYMA_05G165500	0.0109552	0.06855	0.23636	0	0.120878	0.0421622	0	0.190489	0.123937	0.0942212	0	0.108118	0.0395249	0.150259	0	0.202437	0.231251	0.0767509	0.0440064	0.028882	0.0882757	0.0676379	0.221327	0.076138	0.0433009	0.287866	0.160297
		TCP-1/cpn60 chaperonin family protein	57 kDa	No	Cytoplasm	0.7	GLYMA_11G185500	0.331821	0.0857481	0.183397	0	0.323786	0.292866	0.445193	0.403225	0.440537	0.257955	0.144526	0.101856	0.0850145	0.104468	0.0364178	0.483382	0.672389	0.106225	0.122844	0.12709	0.390815	0.463169	0.521802	0.39875	0.307299	0.229136	0.162409
		TCP-1/cpn60 chaperonin family protein	60 kDa	No	Cytoplasm	0.77	GLYMA_16G208700	0.0120542	0.10307	0	0	0.0291922	0.0344799	0.0649989	0.162389	0.262367	0.120559	0.0195962	0.172497	0.0587459	0.0857966	0.0684882	0.228643	0.226669	0.166465	0.0911457	0.0649741	0.126004	0.0913032	0.334252	0.224694	0.152706	0.223172	0.308426
		TCP-1/cpn60 chaperonin family protein	57 kDa	No	Cytoplasm	0.7	GLYMA_12G087300	0.520469	0.701376	1.31247	0	0.608935	0.584221	0.443604	0.812485	1.32493	0.639635	0.4047	0.482187	0.338358	0.223664	0.121851	0.763343	0.916399	0.415642	0.234734	0.342219	0.0529497	0	0.101082	0.071723	0.0456597	0	0.129641
		TCP-1/cpn60 chaperonin family protein	59 kDa	No	Cytoplasm	1	GLYMA_08G364000	0.0122097	0	0	0	0.196437	0	0	0.33829	0.505871	0.0492821	0.024841	0.0978072	0.0490905	0.0279592	0.0877782	0.429694	0.420318	0.135547	0.0473534	0.100794	0.0934489	0.21331	0.393889	0.327614	0.121936	0.0995213	0.0784773
		TCP-1/cpn60 chaperonin family protein	60 kDa	No	Cytoplasm	0.7	GLYMA_02G273200	0.0732395	0.0790946	0	0	0.230227	0.17666	0.128515	0.169593	0.41964	0.227649	0.171308	0.264539	0.145535	0.155923	0	0.494378	0.556609	0.548205	0.126753	0.302908	0.0206926	0	0.0189155	0.00402059	0	0.0607021	0.0327447
		TCP-1/cpn60 chaperonin family protein	60 kDa	No	Cytoplasm	0.7	GLYMA_09G158200	0.158609	0	0	0	0.16086	0.114923	0.177556	0.577824	0.611769	0.158997	0.0515346	0.188093	0.123239	0	0.0227266	0.600923	0.541843	0.202483	0.113453	0.0829608	0.0295	0.0271637	0.118853	0.0920357	0.0154096	0	0.163766
		TCP-1/cpn60 chaperonin family protein	59 kDa	No	Cytoplasm	0.7	GLYMA_11G244700	0.0550858	0.0377491	0.133985	0	0.156607	0	0	0.346859	0.956455	0.0629723	0.0555105	0.106573	0.0498825	0.0135685	0	0.130061	0.203727	0.0622197	0.0470724	0.0381891	0.568032	0.416122	0.431724	1.02254	0.26657	0.457823	0.20888
		TCP-1/cpn60 chaperonin family protein	60 kDa	No	Cytoplasm	0.7	GLYMA_14G043400	0.0471399	0.0535263	0	0	0.216418	0	0	0.220563	0.470152	0.149683	0.067969	0.289352	0.0630704	0.143673	0.0813465	0.509093	0.628009	0.298598	0.12944	0.147358	0.15164	0.143883	0.115674	0.0201716	0.184524	0.0292755	0.149868
		TCP-1/cpn60 chaperonin family protein	58 kDa	No	Cytoplasm	0.7	GLYMA_05G242700	0.010677	0	0	0	0	0.0148044	0.0538822	0.252897	0.118192	0.00996562	0	0.0494376	0.0193417	0	0.0188247	0.0441748	0.0140352	0.0138322	0.00731396	0.0102183	1.44735	0.734628	1.02674	0.75352	0.884635	0.302971	0.877379
		TCP-1/cpn60 chaperonin/ATPase activity	59 kDa	No	Cytoplasm	0.56	GLYMA_02G071900	0.0192508	0	0	0	0.110839	0.0414874	0	0.185432	0.537406	0.119906	0.0813344	0.0344641	0.0584949	0.088563	0.0451531	0.258151	0.262036	0.0996689	0.0415796	0.0410958	0.039045	0.0660318	0.117684	0.0459811	0.0786782	0.130495	0.0883391
		Transmembrane amino acid transporter family protein	59 kDa	No	Endomembrane System	0.83	GLYMA_01G161100	11.8937	8.42746	4.8387	2.0672	5.97569	0.18122	0.161548	0.694902	1.4794	0.691283	0.164328	2.93529	2.40185	0.986517	1.23273	0.38057	0.386385	0.725047	1.86228	1.42164	0.13697	0.224421	0.248413	0.0772962	1.85661	0.105651	0.125987
		Transmembrane amino transporter activity	51 kDa	No	Plasma Membrane	1	GLYMA_16G062600	1.391	1.59523	0.368855	0.580013	0.137612	0.0515995	0.117323	0.225412	0.0155042	1.43547	2.32171	1.75848	0.989629	1.38541	5.21423	0.229058	0.068008	0.307634	0.065377	0.0182904	0.23358	0.484759	0.322765	0.278264	0.106166	0.296257	0.303604
		tRNA arginine adenosine deaminase	148 kDa	No	Nucleus	1	GLYMA_02G129800	0.303558	0.341794	0.26621	0	0.417384	0.464718	0.399431	0	0	0.419971	0.846811	1.03226	0.833282	0.633272	0.632894	1.06295	0.825667	1.27091	1.08715	1.06982	6.11345	3.43539	2.67768	3.25368	1.02462	0.380682	2.22139
		tRNA wobble uridine modification	27 kDa	Yes	Extracellular Space	1	GLYMA_10G082900	0.0642317	0	0	0	0.027632	0	0	0.231095	0.588158	0.0986165	0.115129	0.0739809	0.054781	0.0335103	0.0868236	0.0958259	0.0881722	0.03111	0.0576188	0.0333966	0.0864481	0.0551566	0.0884651	0.0568988	2.12979	0.241829	0.0828315
		Tubulin beta-1 chain	50 kDa	No	Cytoplasm	0.7	GLYMA_06G024100	0.264493	0.0107595	0	18.3036	0	0	0	0.145955	1.35178	0.0377003	0.020475	0.0813134	0.109578	1.05915	0.143528	0.753638	0.575972	0.0203022	0.288942	0.024491	1.67768	1.54672	1.45852	1.89354	0.679376	0.653415	1.9181
		Ubiquinone/Metal ion binding	53 kDa	No	Mitochondrion	0.82	GLYMA_02G003300	0.229514	0.132435	0.371536	1.43654	0.163461	0.41833	0.192894	1.3801	1.08438	0.185379	0.0284923	0.223263	0.400546	0.18624	0.303923	0.318253	0.455838	0.296969	0.224015	0.253895	0.280232	0.349065	0.574982	0.52739	2.01384	1.1637	0.444005
		Uclacyanin 1/copper ion binding	19 kDa	No	Anchored Component Of Plasma Membrane	1	GLYMA_03G109900	1.77766	0.953562	5.16656	0	1.96646	0	0	0.0340625	2.46399	0.0990638	0	6.06264	3.18804	6.77928	5.90757	2.77453	1.48058	1.88634	2.42103	1.90635	0.465307	0.754961	0.694458	0.565044	0.508232	0.208426	0.729701
		Uridine kinase/uracil phosphoribosyltransferase 1	51 kDa	No	Nucleus	1	GLYMA_17G129000	0.0150497	0	0	0	0	0	0	0	0	0	0	0.0713397	0.07163	0.577208	0.471102	0.590975	0.141041	0.0762102	0.293347	0.034351	0.0903517	0.0986976	0.0887336	0.108372	0.0872174	0.0585511	0.0662642
		Uridine kinase/uracil phosphoribosyltransferase 1	53 kDa	No	Nucleus	1	GLYMA_19G089100	1.97283	3.42607	1.87154	0	2.69708	0.712569	0.556674	0.077528	0.323386	3.75319	4.25917	1.1484	1.10566	0.889547	0.806427	1.287	1.16323	1.47328	1.62011	1.28321	0.00281883	0.0259415	0.0478898	0.0418763	0.0854871	0.329419	0.0614961
		Uridine kinase-like 4	55 kDa	No	Nucleus	1	GLYMA_14G011000	0.154478	0.0702789	0.295277	1.45276	0.883253	0.105613	0.0144881	0.0428119	0	0.203938	0.166476	0.218364	0.100713	0.328523	0.185577	0.468554	0.529082	0.324478	0.187906	0.142083	0.217368	0.116265	0.360714	0.379676	0.172033	0	0.190592
		Vacuolar ATP synthase subunit C (VATC) / V-ATPase C subunit / vacuolar proton pump C subunit (DET3)	44 kDa	Yes	Nucleus	1	GLYMA_16G050200	0.263562	0.244598	0.083612	0	0.285612	0.221107	0.147266	0.312948	0.0662076	0.290275	0.342322	0.532927	0.422343	0.284239	0.482552	0.645619	0.585512	0.643604	0.582134	0.461221	0.195943	0.338102	0.385364	0.405329	0.439259	0.452462	0.21995
		Vacuolar ATP synthase subunit D (VATD) / V-ATPase D subunit / vacuolar proton pump D subunit (VATPD)	29 kDa	No	Nucleus	1	GLYMA_07G023400	0.0792541	0.145953	0	0.460087	0.368441	0	0	0.483706	0.659742	0.0924165	0.0188106	0.0802221	0.0747892	0.0797497	0.0637826	0.0882937	0.0992696	0.110633	0.13974	0.0892859	0.0360006	0	0.00621756	0.0150404	0	0	0.0194411
		Vacuolar ATP synthase subunit D (VATD) / V-ATPase D subunit / vacuolar proton pump D subunit (VATPD)	29 kDa	Yes	Nucleus	1	GLYMA_08G218500	0	0	0.11352	0.70028	0	0	0	0.422477	1.12608	0.0378284	0	0.0627829	0.0527682	0	0.0578876	0.0661729	0.00848804	0.0500761	0.0339311	0.0391214	0.109465	0.103174	0.13013	0.0689088	0.0333246	0	0.152632
		Vacuolar ATP synthase subunit E1	27 kDa	No	Nucleus	1	GLYMA_08G020300	0.0502602	0.120069	0	0.76929	0.0722293	0	0	0.422541	1.15768	0.0564956	0	0.420902	0.388078	0.185679	0.298051	0.365928	0.359568	0.419284	0.356959	0.351305	0.863882	0.751854	0.76729	0.702671	0.544123	0.543542	0.864407
		Vacuolar H+-ATPase subunit E isoform 3	27 kDa	Yes	Nucleus	1	GLYMA_05G213800	0.102087	0	0	2.97839	0.0242249	0	0	0.424409	1.56521	0.11559	0.0188106	0.226617	0.260323	0.383804	0.331506	0.313165	0.29813	0.239031	0.405137	0.260212	0.157236	0.0965869	0.147539	0.216797	0.129233	0.171299	0.143121
		Vacuolar iron transporter (VIT) family protein	50 kDa	No	Endomembrane System	0.73	GLYMA_03G084200	0.911455	0.0431842	0	0	0.0496078	0.0359795	0.0305567	0.0619607	0.0564972	0.0566302	0.0619057	0.230307	0.65208	14.4391	1.82692	0.22869	0	0.141866	0.0970398	0.0614906	0.175527	0.229324	0.291169	0.143153	2.47207	0.254734	0.138101
		Vacuolar protein sorting/transport	23 kDa	Yes	Nucleus	1	GLYMA_13G352200	0.313254	0.151375	0	1.07503	0.106812	0	0	0.244438	2.37404	0.018998	0	0.264585	0.094376	0.0553694	0.0717714	0.10081	0.0876564	0.12259	0.113634	0.0694169	0.443021	0.663637	0.408617	0.567819	0.585442	0.697124	0.491403
		Vacuolar proton ATPase A3	93 kDa	Yes	Endomembrane System	0.89	GLYMA_11G113400	0.363138	0.522491	0.457514	0	0.644454	0	0	0.102615	0.618311	1.24246	1.69017	0.734846	0.548675	0.916373	0.735868	0.737061	0.567525	1.07968	0.84172	0.775847	0.302726	0.190198	0.62645	0.406195	2.53764	0.813891	0.213474
		Vesicle-associated membrane protein 713/SNARE activity	25 kDa	No	Endomembrane System	0.96	GLYMA_02G279100	0.200837	0	0	0	0	0	0	0.0525966	0.275077	0.0572984	0.0152179	0.147984	0.11885	0.250527	0.297715	0.173212	0.231474	0.197897	0.129558	0.126765	0.608732	0.931028	0.824651	0.581097	1.22305	0.706846	0.918328
		Vesicle-associated membrane protein 726/SNARE activity	25 kDa	No	Endomembrane System	0.97	GLYMA_07G223000	0.474194	0.0329033	0	19.1389	0.343122	0	0	0.238265	0.917409	0.0661305	0.0434248	0.109141	0.200977	0.194926	0.118566	0.190327	0.274187	0.186567	0.158337	0.127025	0.213775	0.540666	0.300745	0.219289	0.335216	0.986909	0.287062
		Vesicle-associated membrane protein 726/SNARE activity	25 kDa	No	Endomembrane System	0.98	GLYMA_18G172300	0.384476	0.196545	0.170503	1.16243	0.153804	0.268902	0.205143	1.99243	1.70338	0.268564	0.0616186	0.658763	0.517	0.583223	1.07786	0.369785	0.485466	0.571238	0.395334	0.404487	1.31407	0.870258	1.06605	1.2198	0.590041	0.15686	1.95682
		Vesicle-associated membrane protein 726/SNARE activity	25 kDa	No	Endomembrane System	0.97	GLYMA_20G022200	0.0234743	0	0	6.64626	0.129163	0	0	0.0779451	0.331721	0.00854997	0	0.323447	0.326561	0.107379	0.187454	0.597822	0.634583	0.247828	0.447024	0.310501	0.203334	0.237264	0.272754	0.228612	0.132096	0.106739	0.26236
		Vesicle-associated membrane protein/SNARE activity	25 kDa	No	Endomembrane System	0.98	GLYMA_08G355600	0.317979	0.028682	0	0	0.142425	0.589168	0.550979	0.497591	0.369631	0.120182	0.111276	1.38316	1.00846	0.877713	1.28921	0.712937	0.955676	0.956653	0.549892	0.592363	3.15492	0.96606	0.848044	1.20436	0.615405	0.993693	0.914068
		Xanthine/uracil permease family protein	58 kDa	No	Plasma Membrane	0.84	GLYMA_05G035000	1.31793	0.85601	0.920789	0	0.917433	0	0	0.0703561	0.69187	0.154374	0.0971882	1.21292	1.55949	0.097212	0.864273	0.533492	0.605892	0.58197	1.73552	1.31117	1.31407	0.870258	1.06605	1.2198	0.590041	0.15686	1.95682
		YELLOW STRIPE like 6/Integral membrane	74 kDa	No	Plasma Membrane	0.98	GLYMA_16G054200	0.107609	0.0137179	0	0	0.0883665	0.0295905	0	0	0.133383	0.0407496	0.0765907	0.176953	0.210089	0.280311	0.295824	0.168877	0.164178	0.461392	0.308172	0.227137	0.203334	0.237264	0.272754	0.228612	0.132096	0.106739	0.26236
		YELLOW STRIPE like 6/Integral membrane	74 kDa	Yes	Plasma Membrane	0.99	GLYMA_19G094800	0.0839215	0.255327	0.685565	0	0.287291	0	0	0	0	0.0575935	0	0.839557	0.696886	0.823644	1.3356	0.720283	0.674939	1.14626	0.823662	1.07555	3.15492	0.96606	0.848044	1.20436	0.615405	0.993693	0.914068
		ZIP metal ion transporter family	52 kDa	No	Anchored Component Of Plasma Membrane	1	GLYMA_08G092700	0.166834	0.549499	0.517379	0	0.255918	0.0278352	0.0628337	0	0	0.469343	0.461377	0.659979	0.667194	0.738632	0.576478	0.831866	1.09603	0.596571	0.631417	0.562645	0.994867	0.799733	1.12171	1.01324	0.417292	0.886142	0.506033
