# Supplementary material for: Single-cell resolution transcriptome atlases of soybean root organs reveal new regulatory programs controlling the nodulation process
Source: Research Square preprint supplement (doi:10.21203/rs.3.rs-2833917/v1), 2023-05-18
Supplement: Supplementary file 4 [file 24da97cfe000ad1abfeef2f7.xlsx]

## Sheet: DEG_FvsG
Table.S3. List of differentially expressed genes between the clusters F, G, and H; either taken individually or upon combining clusters F and G.
Gene ID	norm_fold Change	pvalue	PFAM annotation	Annotation
Glyma.08G264800	4.52194	0.000112127	PF07722,PF06418	CTP synthase family protein
Glyma.04G173000	3.22669	0.00134141	PF00005,PF12698	ATP-binding cassette A2
Glyma.10G036800	-2.77358	0.00138883	PF07690	phosphate transporter 1;4
Glyma.09G031600	-18.6061	0.00151067	PF13229	Pectin lyase-like superfamily protein
Glyma.16G026900	3.82857	0.00154054	PF03321	Auxin-responsive GH3 family protein
Glyma.03G193800	1.8159	0.0015848	PF01156	uridine-ribohydrolase 1
Glyma.16G172000	-4.95455	0.00229385
Glyma.07G144800	-7.67308	0.00270466	PF00400	Transducin/WD40 repeat-like superfamily protein
Glyma.03G237300	5.2381	0.0028856	PF01477,PF00305	lipoxygenase 1
Glyma.08G071200	3.54907	0.00305225	PF00005,PF01061	white-brown complex homolog protein 11
Glyma.13G139200	1.87391	0.00316128	PF12906	RING/U-box superfamily protein
Glyma.02G221600	-2.14613	0.00339354	PF05978	Major facilitator superfamily protein
Glyma.04G018400	3.22857	0.00343337
Glyma.10G016400	6.51678	0.003625	PF01280	Ribosomal protein L19e family protein
Glyma.13G112600	2.82192	0.00380907	PF02309,PF02362,PF06507	Transcriptional factor B3 family protein / auxin-responsive factor AUX/IAA-related
Glyma.08G283100	3.88043	0.00394694		anthranilate phosphoribosyltransferase, putative
Glyma.12G211700	1.81293	0.00399828	PF07847	Protein of unknown function (DUF1637)
Glyma.15G194000	1.91589	0.0042713	PF04050,PF02854	binding;RNA binding
Glyma.11G091600	3.22917	0.00470584	PF13193,PF00501	4-coumarate:CoA ligase 3
Glyma.10G284400	2.33166	0.00476713	PF07714	ACT-like protein tyrosine kinase family protein
Glyma.12G053300	-2.33333	0.00479208
Glyma.20G144800	1.83816	0.0050091	PF13419	Haloacid dehalogenase-like hydrolase (HAD) superfamily protein
Glyma.05G200800	1.5011	0.00508015	PF02309,PF02362,PF06507	auxin response factor 2
Glyma.18G044000	6.19	0.00509487	PF16457,PF01363,PF08381,PF00415	Regulator of chromosome condensation (RCC1) family with FYVE zinc finger domain
Glyma.17G070500	-9.16176	0.00520521	PF01536	S-adenosylmethionine decarboxylase
Glyma.07G128700	-1.68016	0.00525606		effector of transcription2
Glyma.05G175500	3.47143	0.00586811	PF00925,PF00926	GTP cyclohydrolase II
Glyma.04G064100	2.1676	0.00597184	PF03789,PF03790,PF05920,PF03791	KNOTTED1-like homeobox gene 3
Glyma.20G189900	-1.64151	0.00606852	PF09258	glycosyltransferase family protein 47
Glyma.14G126500	1.51569	0.00642273	PF07885,PF00027,PF11834,PF12796	K+ transporter 1
Glyma.12G185500	-1.76847	0.00645407	PF00786,PF00620	Rho GTPase activating protein with PAK-box/P21-Rho-binding domain
Glyma.02G265500	-6.18367	0.00680011
Glyma.13G364400	-1.63684	0.00704443	PF02451
Glyma.20G091100	-1.85893	0.00736965		neurofilament protein-related
Glyma.19G114600	-5.66667	0.00740411	PF00635,PF12796	protein kinases;ubiquitin-protein ligases
Glyma.09G228100	1.93735	0.00749637	PF07227,PF16312	Protein of unknown function (DUF1423)
Glyma.08G156800	1.57252	0.00752797	PF04652,PF14288,PF02364	callose synthase 5
Glyma.13G183900	1.84731	0.00760723	PF13923,PF00271,PF00176	SNF2 domain-containing protein / helicase domain-containing protein / zinc finger protein-related
Glyma.09G094100	-33	0.00764921
Glyma.08G038600	-2.94366	0.00765647	PF13738	Flavin-binding monooxygenase family protein
Glyma.15G078300	7.8	0.00767635	PF02365	NAC domain containing protein 73
Glyma.20G081500	5.75	0.00779934	PF00168,PF01764	triglyceride lipases;triglyceride lipases
Glyma.17G125300	2.53306	0.00900891	PF00067	cytochrome P450, family 71, subfamily B, polypeptide 37
Glyma.08G161100	15	0.00909068
Glyma.12G114200	7.5	0.00909329	PF04720	Protein of unknown function (DUF506)
Glyma.09G089700	1.8169	0.00934455	PF14531,PF03822	CBL-interacting protein kinase 23
Glyma.09G276100	-12.6667	0.00954861	PF01554	MATE efflux family protein
Glyma.18G266900	-5.31915	0.00975378	PF03639	glycosyl hydrolase family 81 protein
Glyma.08G227900	-1.51072	0.00975974
Glyma.10G002100	1.96412	0.00989377	PF04720	Protein of unknown function (DUF506)
Glyma.19G095000	-3.16162	0.00998221
Glyma.06G209000	2.1087	0.0102228	PF00808	nuclear factor Y, subunit B13
Glyma.10G062800	-1.98925	0.0102992	PF10358
Glyma.09G209900	3.30986	0.0103248	PF00503	extra-large GTP-binding protein 3
Glyma.01G117200	3.87179	0.0103892	PF08263,PF13855	receptor like protein 7
Glyma.10G051800	2.1961	0.0106451	PF12906	RING/U-box superfamily protein
Glyma.17G253000	2.09215	0.0108269	PF03765,PF00650	Sec14p-like phosphatidylinositol transfer family protein
Glyma.16G130500	5.14458	0.0110401	PF11995,PF00225	ATP binding microtubule motor family protein
Glyma.01G230900	1.57227	0.011293	PF00034	cytochrome c-2
Glyma.13G353200	1.68237	0.0114291		actin binding protein family
Glyma.13G241800	2.24309	0.0116938	PF04046,PF04037	proline-rich spliceosome-associated (PSP) family protein
Glyma.09G283800	11.3182	0.0117408	PF01486,PF00319	K-box region and MADS-box transcription factor family protein
Glyma.13G225700	-2.33929	0.0119929	PF00447	heat shock transcription factor A4A
Glyma.06G292200	2.62838	0.0123035	PF00069	Protein kinase superfamily protein
Glyma.13G304400	-7.08824	0.012318	PF06955,PF00722	xyloglucan endotransglucosylase/hydrolase 9
Glyma.18G080400	2.22581	0.0123283	PF00067	cytochrome P450, family 71, subfamily B, polypeptide 34
Glyma.06G296800	5.48	0.0130681	PF08263,PF13855,PF07714	STRUBBELIG-receptor family 3
Glyma.13G259200	-3.41667	0.0135726		interactor of constitutive active rops 1
Glyma.18G021100	-2.66805	0.013676	PF01019	gamma-glutamyl transpeptidase 1
Glyma.08G127000	2.03219	0.0138197	PF00069	Protein kinase superfamily protein
Glyma.12G074800	1.77293	0.013845	PF09743
Glyma.13G309700	1.58602	0.0143955	PF14634,PF00271,PF00176	Helicase protein with RING/U-box domain
Glyma.08G042200	1.89216	0.0147658	PF04921	XAP5 family protein
Glyma.03G246200	-1.56497	0.0149108	PF13178,PF00612	IQ-domain 19
Glyma.20G138900	4.21429	0.0151583	PF01657,PF07714	cysteine-rich RLK (RECEPTOR-like protein kinase) 29
Glyma.03G113600	2.93103	0.0153884	PF03547	Auxin efflux carrier family protein
Glyma.06G050800	2.47059	0.015525	PF10258
Glyma.13G234200	3.63158	0.0158381	PF02362,PF06507	Transcriptional factor B3 family protein / auxin-responsive factor AUX/IAA-related
Glyma.07G213500	2.21277	0.0159316	PF01039	3-methylcrotonyl-CoA carboxylase
Glyma.03G130000	1.5	0.0160251	PF00072	response regulator 9
Glyma.19G198400	-2.48649	0.0160439	PF03641	Putative lysine decarboxylase family protein
Glyma.13G067800	1.9012	0.0164899	PF08295,PF02671,PF16879	SIN3-like 2
Glyma.17G133500	-1.95588	0.0165168	PF05922,PF02225,PF00082	Subtilase family protein
Glyma.04G109500	-3.91045	0.0167081	PF00931	transmembrane receptors;ATP binding
Glyma.09G212900	1.94536	0.0175252	PF00069	Protein kinase superfamily protein
Glyma.18G274400	-2.66058	0.0177475	PF00201	UDP-Glycosyltransferase superfamily protein
Glyma.20G178300	2.08673	0.0178515
Glyma.13G037400	-2.15385	0.0179736	PF05631	Major facilitator superfamily protein
Glyma.13G214900	1.57544	0.0182698	PF00646,PF01167	tubby like protein 3
Glyma.07G192500	1.6015	0.0183173	PF13923,PF00271,PF00176	SNF2 domain-containing protein / helicase domain-containing protein / zinc finger protein-related
SSU-rRNA-eukarya.134	1.79085	0.018352		rRNA processing protein-related
Glyma.09G002400	1.81609	0.0183907	PF00069	Protein kinase family protein with ARM repeat domain
Glyma.10G053600	3.22222	0.0185723	PF00278,PF02784	Pyridoxal-dependent decarboxylase family protein
Glyma.08G115400	7.23077	0.0186345	PF13193	acyl-activating enzyme 18
Glyma.19G120400	-38.7051	0.0187481	PF08502,PF00682	2-isopropylmalate synthase 1
Glyma.17G151800	-2.23881	0.0191048	PF02212,PF00350,PF01031	DYNAMIN-like 1E
Glyma.20G123800	2.96226	0.0193607
Glyma.13G348200	1.91209	0.0194333	PF12710,PF16209,PF16212	ATPase E1-E2 type family protein / haloacid dehalogenase-like hydrolase family protein
Glyma.13G310900	2.46067	0.019917	PF13639	RING-H2 group F2A
Glyma.09G260500	-6.5	0.0199271	PF00228
Glyma.06G050100	4.5	0.020214	PF01063	branched-chain amino acid transaminase 2
Glyma.05G156000	-3.62963	0.0203839	PF07983,PF00332	O-Glycosyl hydrolases family 17 protein
Glyma.19G239800	6.11111	0.0204548	PF08501,PF01487	dehydroquinate dehydratase, putative / shikimate dehydrogenase, putative
Glyma.08G354800	2.54839	0.0209153	PF06027	EamA-like transporter family
Glyma.17G145000	-2.86364	0.0209986	PF05903	PPPDE putative thiol peptidase family protein
Glyma.13G200400	5.33333	0.0210987	PF00743	Flavin-binding monooxygenase family protein
Glyma.08G245600	-6.57143	0.0215867	PF03639	glycosyl hydrolase family 81 protein
Glyma.14G028100	2.25786	0.0216125	PF06293	MAP kinase 20
Glyma.13G328800	-1.53865	0.0217751	PF02451
Glyma.11G038800	3.12727	0.0218315	PF00069	Protein kinase superfamily protein
Glyma.11G203900	1.88281	0.0220047	PF04970	NC domain-containing protein-related
Glyma.08G218100	3.55212	0.0224359	PF01073	cinnamoyl coa reductase 1
Glyma.01G175700	3.4918	0.0225262
Glyma.20G190500	1.82927	0.0228626	PF00534	UDP-Glycosyltransferase superfamily protein
Glyma.11G031400	2.68627	0.0229415	PF15413,PF01237	OSBP(oxysterol binding protein)-related protein 2A
Glyma.02G024200	5.11111	0.0230061	PF04601	Actin cross-linking protein
Glyma.02G158300	2.94737	0.0231023
Glyma.08G087600	2.13028	0.0232819	PF00627,PF14377,PF06012,PF00632,PF06025	ubiquitin-protein ligase 1
Glyma.16G118800	1.76669	0.0233899	PF00132,PF06426	serine acetyltransferase 3;2
Glyma.16G219100	1.53215	0.0237998	PF07714	Protein kinase superfamily protein
Glyma.14G098100	2.33333	0.0238447	PF02431	Chalcone-flavanone isomerase family protein
Glyma.12G159800	-5.4375	0.0241872
Glyma.20G185600	-2.51351	0.024598	PF13920,PF10269	Transmembrane Fragile-X-F-associated protein
Glyma.02G044300	1.86054	0.0248405	PF13441,PF13639	NEP-interacting protein 2
Glyma.06G136400	8	0.0252017
Glyma.12G078500	3.23684	0.025605	PF13207	P-loop containing nucleoside triphosphate hydrolases superfamily protein
Glyma.15G212200	-2.2439	0.0256889
Glyma.13G157300	2.72	0.0257448	PF03789,PF03790,PF05920,PF03791	KNOTTED1-like homeobox gene 3
Glyma.19G065600	1.58313	0.0259085	PF14691,PF07992,PF01493,PF04898,PF00310,PF01645	NADH-dependent glutamate synthase 1
Glyma.09G283600	4.38182	0.0259918	PF02375,PF02373	Transcription factor jumonji (jmj) family protein / zinc finger (C5HC2 type) family protein
Glyma.05G089200	2.29104	0.0261595	PF13906,PF13520	cationic amino acid transporter 2
Glyma.08G162300	2.24297	0.0266023	PF07926	nuclear pore anchor
Glyma.04G067800	1.56104	0.0267092	PF00153	Mitochondrial substrate carrier family protein
Glyma.13G184500	3.5	0.0270316	PF00249,PF00439	bromodomain 4
Glyma.18G132500	3.78571	0.0270765	PF16656,PF14008,PF00149	Purple acid phosphatases superfamily protein
Glyma.16G044400	1.68421	0.0272588	PF08389	ARM repeat superfamily protein
Glyma.18G197800	3.41667	0.0275798	PF12710,PF01553	glycerol-3-phosphate acyltransferase 6
Glyma.07G199200	1.96314	0.0277963	PF00153	Mitochondrial substrate carrier family protein
Glyma.15G260700	-1.91724	0.0278871	PF14541	Eukaryotic aspartyl protease family protein
Glyma.15G128700	2.49302	0.0281725	PF00141	Peroxidase superfamily protein
Glyma.05G006800	3.8	0.028219	PF00122,PF12710,PF16209,PF16212	ATPase E1-E2 type family protein / haloacid dehalogenase-like hydrolase family protein
Glyma.20G132900	2.63158	0.0283673	PF13812,PF13041,PF14432	Tetratricopeptide repeat (TPR)-like superfamily protein
Glyma.16G026700	-3.09091	0.0286834	PF11331	Protein of unknown function (DUF3133)
Glyma.01G026600	6.4	0.0288638
Glyma.17G188300	1.95224	0.0289866	PF06176,PF03109,PF00144	ABC1 family protein
Glyma.18G173600	1.67141	0.0289922
Glyma.13G059400	1.62121	0.0290607		chorismate mutase 1
Glyma.02G252600	3.26316	0.0291366	PF03759	ROP guanine nucleotide exchange factor 5
Glyma.06G117700	-3.5	0.0291577	PF07496,PF00856	histone methyltransferases(H3-K4 specific);histone methyltransferases(H3-K36 specific)
Glyma.07G192000	3.98039	0.0293371	PF00249,PF00439	bromodomain 4
Glyma.04G010500	1.73529	0.0294652	PF03765,PF00650	Sec14p-like phosphatidylinositol transfer family protein
Glyma.16G039800	4.29412	0.0296004
Glyma.05G079700	3.48052	0.0296817	PF13499	calmodulin 5
Glyma.10G102800	1.8125	0.0298534	PF03485	Arginyl-tRNA synthetase, class Ic
Glyma.15G261300	3.55	0.0300138	PF00808	nuclear factor Y, subunit C2
Glyma.13G362400	-1.59821	0.0302666	PF12697	alpha/beta-Hydrolases superfamily protein
Glyma.02G252900	2.05085	0.0303446	PF04788	Protein of unknown function (DUF620)
Glyma.05G113400	3.42857	0.030349	PF00481	poltergeist like 1
Glyma.11G225300	2.77778	0.0303576	PF09778	guanylyl cyclase 1
Glyma.11G181500	1.71094	0.0303694	PF02338	OTU-like cysteine protease family protein
Glyma.16G120500	5.09091	0.0304697		GDSL-like Lipase/Acylhydrolase superfamily protein
Glyma.11G238400	5.47619	0.0305048	PF01740,PF00916	slufate transporter 2;1
Glyma.20G122600	1.975	0.030562	PF00270,PF00035,PF00271,PF07717,PF04408	DEA(D/H)-box RNA helicase family protein
Glyma.13G151800	1.91478	0.0306152	PF00274	Aldolase superfamily protein
Glyma.05G070500	2.69362	0.0308402	PF14572,PF13793	Phosphoribosyltransferase family protein
Glyma.19G003100	-1.86047	0.0310471	PF04724	beta-1,4-N-acetylglucosaminyltransferase family protein
Glyma.13G125700	-1.61667	0.0310943	PF02115	Immunoglobulin E-set superfamily protein
Glyma.18G216100	1.57536	0.0317873		Mitochondrial ATP synthase D chain-related protein
Glyma.01G094800	1.72653	0.0318962	PF02493	Histone H3 K4-specific methyltransferase SET7/9 family protein
Glyma.17G125100	8.18182	0.0319052	PF02445	quinolinate synthase
Glyma.12G170200	-15.6667	0.0319761
Glyma.03G137900	2.47778	0.0321326	PF05691	seed imbibition 2
Glyma.08G173400	-10.6	0.0323949	PF02365	NAC domain containing protein 1
Glyma.10G092100	2.55833	0.0333159	PF00170,PF14144	bZIP transcription factor family protein
Glyma.17G248400	1.89286	0.0334029	PF07974,PF01457	metalloendopeptidases;zinc ion binding
Glyma.04G220400	-1.71429	0.0334952	PF08263,PF00560,PF00069	Leucine-rich receptor-like protein kinase family protein
Glyma.05G183700	2.00449	0.0336012	PF13238	shikimate kinase 1
Glyma.14G039000	2.16667	0.0337396	PF14369,PF13639	RING-H2 finger C1A
Glyma.02G115200	1.54765	0.0340517	PF03106	WRKY DNA-binding protein 57
Glyma.20G241400	1.5608	0.0342341
Glyma.18G233500	-3.02941	0.0343186	PF04564,PF00069	U-box domain-containing protein kinase family protein
Glyma.02G149600	4.03125	0.0344174	PF00651	BTB-POZ and MATH domain 2
Glyma.07G009900	10.8333	0.0344661	PF00732,PF05199	Glucose-methanol-choline (GMC) oxidoreductase family protein
Glyma.01G231400	1.5942	0.0347336	PF00254	FK506 BINDING PROTEIN 53
Glyma.13G160300	-2.2069	0.0347839	PF00515	Tetratricopeptide repeat (TPR)-like superfamily protein
Glyma.13G199600	-5.75	0.0349205	PF04777	Erv1/Alr family protein
Glyma.13G325600	-3.59459	0.0350478	PF00035	dsRNA-binding protein 2
Glyma.11G251400	6.33333	0.0357
Glyma.09G148400	-5.6	0.0357943	PF00266	Pyridoxal phosphate (PLP)-dependent transferases superfamily protein
Glyma.14G078300	1.83658	0.0358088
Glyma.14G201800	3.41176	0.0360201	PF00141	Peroxidase superfamily protein
Glyma.07G063300	1.85333	0.0367463	PF00931	NB-ARC domain-containing disease resistance protein
Glyma.15G244100	-2.01408	0.0367765		Peptidase S24/S26A/S26B/S26C family protein
Glyma.03G134200	2.81737	0.0371238	PF00690,PF12515,PF12710,PF00689,PF00122	autoinhibited Ca2+-ATPase 11
Glyma.05G002300	-8.5	0.0372205	PF16198,PF01509	Pseudouridine synthase family protein
Glyma.19G012100	1.6	0.0373439	PF14416,PF13839	TRICHOME BIREFRINGENCE-LIKE 22
Glyma.13G245900	1.86508	0.0374523	PF07496,PF02362	HSI2-like 1
Glyma.05G194900	4.16667	0.0375511	PF01301	glycosyl hydrolase family 35 protein
Glyma.12G067600	4.28571	0.0377696
Glyma.13G149600	1.83471	0.0378087	PF14299	phloem protein 2-A15
Glyma.08G082400	2.53409	0.0383243	PF03106	WRKY DNA-binding protein 28
Glyma.07G036500	1.86957	0.0383396	PF13713,PF08381	DZC (Disease resistance/zinc finger/chromosome condensation-like region) domain containing protein
Glyma.12G222000	-3.44681	0.0387237	PF06749	Protein of unknown function (DUF1218)
Glyma.20G002700	-12	0.0391423	PF00067	cytochrome P450, family 86, subfamily B, polypeptide 1
Glyma.09G232400	3.44444	0.0393173	PF07714	AGC (cAMP-dependent, cGMP-dependent and protein kinase C) kinase family protein
Glyma.04G192300	1.56279	0.03958	PF14288,PF02364	glucan synthase-like 8
Glyma.11G055400	5.57143	0.0396123	PF01764	alpha/beta-Hydrolases superfamily protein
Glyma.13G193500	-2.28571	0.0399022	PF00160	Cyclophilin-like peptidyl-prolyl cis-trans isomerase family protein
Glyma.05G002000	-2.4	0.0403466	PF05701	Plant protein of unknown function (DUF827)
Glyma.05G178200	2.47368	0.0404522	PF01833,PF00612,PF03859	signal responsive 1
Glyma.07G055200	1.57407	0.0406224	PF00010,PF14215	basic helix-loop-helix (bHLH) DNA-binding superfamily protein
Glyma.03G167900	-2.83333	0.0409972	PF00282	Pyridoxal phosphate (PLP)-dependent transferases superfamily protein
Glyma.19G132900	2.28	0.0411747	PF01734,PF11815	Patatin-like phospholipase family protein
Glyma.11G007100	1.57042	0.0416118	PF07714	Protein kinase superfamily protein
Glyma.17G075600	-2.4	0.0416828
Glyma.07G090800	1.85955	0.0418858
Glyma.05G024500	1.53906	0.0419586	PF10409,PF02181	actin binding
Glyma.01G056800	1.58707	0.0420121	PF03106	WRKY DNA-binding protein 57
Glyma.03G021400	1.52014	0.042031	PF00400,PF14844,PF15787,PF02138	WD-40 repeat family protein / beige-related
Glyma.15G071600	1.93247	0.0432918	PF04046,PF04037	proline-rich spliceosome-associated (PSP) family protein
Glyma.17G061100	1.73077	0.0433192	PF02458	spermidine hydroxycinnamoyl transferase
Glyma.18G245500	1.736	0.0433264
Glyma.14G222700	1.58	0.0434554	PF00326,PF02897	Prolyl oligopeptidase family protein
Glyma.14G152100	1.58712	0.0434771	PF00171	aldehyde dehydrogenase 3H1
Glyma.02G217100	1.83529	0.0435632	PF00464	serine hydroxymethyltransferase 2
Glyma.02G186700	14	0.0439648	PF00326	S-formylglutathione hydrolase
Glyma.13G183600	2.03333	0.0443875	PF01397,PF03936	terpene synthase 04
Glyma.15G071500	2.07609	0.0445146	PF00931	NB-ARC domain-containing disease resistance protein
Glyma.02G216000	1.50259	0.044525	PF00627,PF14377,PF06012,PF06025,PF00632	ubiquitin-protein ligase 1
Glyma.02G252000	2.42623	0.0445875	PF00025	RAB GTPase homolog A2B
Glyma.08G048100	1.65298	0.0445992	PF01459	translocase of the outer mitochondrial membrane 40
Glyma.01G060700	1.54483	0.0449259	PF00271,PF04408,PF07717	RNA helicase family protein
Glyma.08G119700	1.65263	0.0450289	PF04564,PF00514	plant U-box 17
Glyma.07G234900	-2.71739	0.0451505	PF12776
Glyma.10G169600	3.07565	0.0454172	PF00646,PF14299	phloem protein 2-B10
Glyma.09G281200	2.57576	0.0454977	PF00153	Mitochondrial substrate carrier family protein
Glyma.09G017500	-3.14286	0.0456588	PF12695	alpha/beta-Hydrolases superfamily protein
Glyma.13G325000	1.51973	0.0460568	PF00169,PF01852,PF07059	Pleckstrin homology (PH) and lipid-binding START domains-containing protein
Glyma.01G072400	-4.4	0.0462209	PF01637,PF13855	NB-ARC domain-containing disease resistance protein
Glyma.17G178800	1.55072	0.0465752	PF00069	sucrose nonfermenting 1(SNF1)-related protein kinase 2.3
Glyma.09G082800	5.5	0.0466895
Glyma.06G101600	2.98522	0.0468455	PF12937,PF13621	transferases, transferring glycosyl groups
Glyma.08G002500	-5.28571	0.0469901	PF02449	Glycosyl hydrolase family 35 protein
Glyma.09G149000	12.1429	0.0470231	PF01486,PF00319	AGAMOUS-like 6
Glyma.18G153500	1.54499	0.0476067	PF03330,PF01357	expansin A4
Glyma.10G165600	-1.55652	0.0478341
Glyma.07G010800	17	0.0480438	PF13833,PF13499	calcineurin B-like protein 10
Glyma.17G185500	21.5	0.0481491	PF00338	ribosomal protein S10
Glyma.19G215100	1.69136	0.0482838	PF01556,PF00226	DNAJ heat shock family protein
Glyma.13G044100	-1.6305	0.0483025	PF02458	HXXXD-type acyl-transferase family protein
Glyma.01G102400	2.21429	0.0488048	PF04535	Uncharacterised protein family (UPF0497)
Glyma.09G165100	-2	0.049276		Peptidoglycan-binding LysM domain-containing protein
Glyma.20G225000	2.38095	0.0496941	PF02309	indoleacetic acid-induced protein 16

## Sheet: DEG_FGvsH
Gene ID	norm_fold Change	pvalue	PFAM annotation	Annotation
Glyma.18G274400	8967	0.000481545	PF00201	UDP-Glycosyltransferase superfamily protein
Glyma.12G052700	3816.5	0.00130485		ARM repeat superfamily protein
Glyma.07G136500	3478	0.00702895	PF00415	Regulator of chromosome condensation (RCC1) family protein
Glyma.04G057400	2429	0.000377128	PF02170,PF04851,PF00271,PF03368,PF00636	dicer-like 3
Glyma.14G148700	2335	0.000956154		P-loop containing nucleoside triphosphate hydrolases superfamily protein
Glyma.15G071600	1647	0.000389218	PF04046,PF04037	proline-rich spliceosome-associated (PSP) family protein
Glyma.01G186000	1613	0.0020991	PF09750
Glyma.02G033600	1576	0.00100041	PF02705	K+ uptake permease 6
Glyma.14G130700	1551	0.000701151	PF13639,PF05495,PF14599	CHY-type/CTCHY-type/RING-type Zinc finger protein
Glyma.06G127400	1524	0.000518197	PF14691,PF07992,PF01493,PF04898,PF01645,PF00310	NADH-dependent glutamate synthase 1
Glyma.01G077200	1454	0.000770234	PF00867,PF00752	5'-3' exonuclease family protein
Glyma.14G129100	1330	0.00423377	PF13639	RING/U-box superfamily protein
Glyma.07G128700	1288.17	7.62908e-07		effector of transcription2
Glyma.14G143000	1277	0.000393453	PF00790	ENTH/VHS/GAT family protein
Glyma.08G218200	1255	0.000773541	PF01566	NRAMP metal ion transporter 6
Glyma.05G146400	1248.8	9.0809e-05	PF16923,PF03200	glucosidase 1
Glyma.13G353200	1216	0.000333117		actin binding protein family
Glyma.08G258500	1212	0.00113971	PF13831,PF05965,PF05964,PF00856,PF00855,PF13771	trithorax-like protein 2
Glyma.20G241400	1103	0.000475015
Glyma.05G076800	1091	0.00227652		plastid transcriptionally active 9
Glyma.11G029300	1073	0.000114612
Glyma.04G117400	1040	0.000167589	PF01432	Zincin-like metalloproteases family protein
Glyma.19G041700	1033	0.00135342	PF14416,PF13839	TRICHOME BIREFRINGENCE-LIKE 19
Glyma.13G224300	1018	0.010093	PF07714	Protein kinase superfamily protein
Glyma.16G072600	1001	0.00783591
Glyma.19G067100	959	8.91915e-05	PF03219	TLC ATP/ADP transporter
Glyma.03G227600	958	0.015601	PF03283	Pectinacetylesterase family protein
Glyma.02G267800	929	0.00770586	PF00097,PF00400	Transducin/WD40 repeat-like superfamily protein
Glyma.01G031400	895	9.26522e-05	PF00076,PF01480	splicing factor PWI domain-containing protein / RNA recognition motif (RRM)-containing protein
Glyma.09G175800	877	0.00200918	PF01798,PF13041	NOP56-like pre RNA processing ribonucleoprotein
Glyma.14G142100	874	0.000676598	PF04258	signal peptide peptidase
Glyma.20G227200	837	0.002356	PF04851,PF00271	P-loop containing nucleoside triphosphate hydrolases superfamily protein
Glyma.09G083800	814	0.000895024	PF07928	VPS54
Glyma.07G062900	783.5	0.000618902	PF00931	NB-ARC domain-containing disease resistance protein
Glyma.16G085100	755	0.000981444	PF13414	carboxyl terminus of HSC70-interacting protein
Glyma.20G054600	716	0.00143822	PF00443,PF14533,PF12436	ubiquitin-specific protease 13
Glyma.20G160900	715.5	0.00201061	PF04564,PF07714	U-box domain-containing protein kinase family protein
Glyma.07G036300	715.375	0.0016869	PF14438,PF06741	CTC-interacting domain 4
Glyma.20G086700	708	0.000658275	PF00917	TRAF-like superfamily protein
Glyma.17G244600	696	0.0148308	PF00149	Calcineurin-like metallo-phosphoesterase superfamily protein
Glyma.13G330600	686.5	0.00224226	PF00225	P-loop containing nucleoside triphosphate hydrolases superfamily protein
Glyma.13G027800	685.667	0.000266662	PF00443,PF14533,PF12436	ubiquitin-specific protease 13
Glyma.12G196000	670.5	0.000796378	PF03124	EXS (ERD1/XPR1/SYG1) family protein
Glyma.20G031800	658	0.0226336	PF11265	phytochrome and flowering time regulatory protein (PFT1)
Glyma.07G207700	606	0.000434415	PF00168,PF02893,PF16016	C2 domain-containing protein / GRAM domain-containing protein
Glyma.01G187200	588.5	0.000479899		PLC-like phosphodiesterases superfamily protein
Glyma.16G154800	558	0.00406988
Glyma.20G170000	544.5	0.00528949		gigantea protein (GI)
Glyma.13G183900	532	7.65817e-05	PF13923,PF00271,PF00176	SNF2 domain-containing protein / helicase domain-containing protein / zinc finger protein-related
Glyma.10G047800	526.647	0.000319598	PF00566	Ypt/Rab-GAP domain of gyp1p superfamily protein
Glyma.08G162300	521	0.000548635	PF07926	nuclear pore anchor
Glyma.19G120400	518	0.00953714	PF08502,PF00682	2-isopropylmalate synthase 1
Glyma.11G237700	517	0.000140095	PF00136,PF03104,PF08490	DNA polymerase epsilon catalytic subunit
Glyma.01G093900	516	0.0011533		ARM repeat superfamily protein
Glyma.06G201700	505	0.00026823	PF00271,PF04408,PF07717	RNA helicase family protein
Glyma.17G133000	500.5	0.00476216	PF00400	FIZZY-related 2
Glyma.02G310900	494	0.000190949	PF16414,PF02460	Patched family protein
Glyma.04G096300	494	0.00081028	PF06200,PF00320,PF06203	ZIM-like 1
Glyma.07G034600	492	0.00121407	PF09405	CASC3/Barentsz eIF4AIII binding
Glyma.15G138800	490.818	0.00371286	PF00400	Transducin/WD40 repeat-like superfamily protein
Glyma.12G059700	489	0.00339805	PF01480	splicing factor PWI domain-containing protein
Glyma.12G098800	481	0.00495424	PF00899	NAD(P)-binding Rossmann-fold superfamily protein
Glyma.18G147700	479	0.000259055	PF00860	Xanthine/uracil permease family protein
Glyma.20G218800	462	0.000155391	PF14237,PF00076	RNA binding (RRM/RBD/RNP motifs) family protein
Glyma.13G182600	460.667	0.00084216	PF04046,PF04037	proline-rich spliceosome-associated (PSP) family protein
Glyma.20G017000	460	0.00644474	PF13207,PF00485	P-loop containing nucleoside triphosphate hydrolases superfamily protein
Glyma.09G120600	459.875	0.00260635	PF07651	ENTH/ANTH/VHS superfamily protein
Glyma.13G241800	457	0.00326394	PF04046,PF04037	proline-rich spliceosome-associated (PSP) family protein
Glyma.16G144200	456	0.00144717	PF06650	Protein of unknown function (DUF1162)
Glyma.09G064100	456	0.00170419
Glyma.06G003000	454	0.00150501		ARM repeat superfamily protein
Glyma.07G125300	453.5	0.00133939	PF04567,PF04565,PF04566,PF04561,PF04560,PF04563,PF00562	nuclear RNA polymerase C2
Glyma.05G215100	449.5	0.00119484	PF07765	myosin heavy chain-related
Glyma.18G173600	447	1.36954e-05
Glyma.15G049000	443	0.00168827	PF00170	Basic-leucine zipper (bZIP) transcription factor family protein
Glyma.01G121400	441	0.00280612	PF11935,PF12295	HEAT repeat-containing protein
Glyma.09G112200	437	0.00128128	PF04851,PF07529,PF00271	SNF2 domain-containing protein / helicase domain-containing protein
Glyma.17G095800	434.5	0.000925644	PF00443,PF04781,PF04780	Ubiquitin carboxyl-terminal hydrolase-related protein
Glyma.17G165900	433	0.000229429	PF08513,PF00400	WD-40 repeat family protein
Glyma.10G135700	431	0.00825303	PF12708	Pectin lyase-like superfamily protein
Glyma.12G157700	426	0.000980399	PF00645,PF08645	phosphoesterase
Glyma.14G010300	421.833	0.0023927	PF03222	amino acid permease 7
Glyma.08G063200	419	0.00966548	PF01063	branched-chain amino acid transaminase 2
Glyma.18G216100	414.333	0.000251921		Mitochondrial ATP synthase D chain-related protein
Glyma.19G065600	411.333	0.00030405	PF14691,PF07992,PF01493,PF04898,PF00310,PF01645	NADH-dependent glutamate synthase 1
Glyma.14G122200	401.5	0.000870839	PF00450	serine carboxypeptidase-like 42
Glyma.U029000	401	0.000721816	PF00397,PF01846	pre-mRNA-processing protein 40A
Glyma.17G255500	391	0.000368834	PF13450,PF04433	LSD1-like 3
Glyma.20G071200	386.5	0.00586603	PF13423,PF14533,PF12436	ubiquitin-specific protease 13
Glyma.06G001900	385	0.00109705	PF00318,PF01704	UDP-GLUCOSE PYROPHOSPHORYLASE 1
Glyma.06G240500	380	0.000657873		proton pump interactor 1
Glyma.20G024500	378	0.00375644	PF13015,PF12999	calmodulin-binding protein
Glyma.14G129500	375	0.000888577		embryo defective 2410
Glyma.14G149300	371	0.00898718	PF13414	Tetratricopeptide repeat (TPR)-like superfamily protein
Glyma.06G008300	367	0.000158174	PF02201,PF02213,PF03126	nucleic acid binding;zinc ion binding;DNA binding
Glyma.09G115600	366	0.00754306	PF00270,PF00035,PF00271,PF07717,PF04408	DEA(D/H)-box RNA helicase family protein
Glyma.08G237500	364.25	0.000593568	PF07724,PF01434	FTSH protease 12
Glyma.13G080100	364	0.00391787	PF16546,PF13414	Tetratricopeptide repeat (TPR)-like superfamily protein
Glyma.07G063100	356	0.00105257		Disease resistance protein (CC-NBS-LRR class) family
Glyma.07G233100	355.667	9.9825e-05	PF16909,PF06650,PF06101,PF12624,PF16910,PF16908	calcium-dependent lipid-binding family protein
Glyma.01G031800	354.9	0.000333031	PF02705	K+ uptake permease 6
Glyma.02G221600	351	0.00108626	PF05978	Major facilitator superfamily protein
Glyma.15G036700	351	0.00499094	PF03152	Ubiquitin fusion degradation UFD1 family protein
Glyma.06G070300	350	0.000291149	PF00160	Cyclophilin-like peptidyl-prolyl cis-trans isomerase family protein
Glyma.10G133700	344	0.00031979	PF00400,PF08606	MOS4-associated complex 3B
Glyma.06G202500	343.5	0.00541454	PF00271,PF00270,PF02889	U5 small nuclear ribonucleoprotein helicase
Glyma.07G000400	339	0.00216112	PF00569,PF00628,PF02135,PF08214	histone acetyltransferase of the CBP family 12
Glyma.17G060400	337.923	0.000321955	PF12710,PF00122	heavy metal atpase 2
Glyma.17G197200	337	0.00175926
Glyma.10G091000	335	0.00631446	PF12971,PF12972,PF05089	alpha-N-acetylglucosaminidase family / NAGLU family
Glyma.15G176400	334	0.00457095	PF13371,PF13424,PF13414,PF00515	binding
Glyma.15G246800	333.333	2.00551e-05	PF00931	NB-ARC domain-containing disease resistance protein
Glyma.03G132500	331	0.0133072		Eukaryotic translation initiation factor eIF2A family protein
Glyma.05G085400	330.5	0.00237307	PF00225	P-loop containing nucleoside triphosphate hydrolases superfamily protein
Glyma.05G042700	325	0.000274223	PF07714	FUS3-complementing gene 2
Glyma.07G249800	325	0.00136481	PF06584	DNA binding
Glyma.05G089300	322	0.00385844	PF08066,PF00570,PF01612	Polynucleotidyl transferase, ribonuclease H fold protein with HRDC domain
Glyma.08G300800	319.25	0.016427	PF02517	CAAX amino terminal protease family protein
Glyma.07G149900	319	0.0034241	PF04791	LMBR1-like membrane protein
Glyma.11G196900	318	0.000360423		ATP-dependent helicase family protein
Glyma.13G109600	313.571	0.00090771	PF03456,PF02141	DENN (AEX-3) domain-containing protein
Glyma.03G024000	311	0.000276791	PF00270,PF07717,PF00271,PF04408	RNA helicase family protein
Glyma.17G050100	310.538	0.00205322	PF03456,PF02141	DENN (AEX-3) domain-containing protein
Glyma.13G130000	309	0.00562083	PF12755,PF02985,PF12348	CLIP-associated protein
Glyma.08G102200	308	0.00562087
Glyma.02G102700	305.688	0.000689776		PLC-like phosphodiesterases superfamily protein
Glyma.08G281400	303	0.000833029	PF02893	GRAM domain family protein
Glyma.16G074300	303	0.00243466	PF00069	Protein kinase superfamily protein
Glyma.07G113100	300.648	0.001641	PF03547	Auxin efflux carrier family protein
Glyma.06G032500	298	0.00208518	PF00342	Sugar isomerase (SIS) family protein
Glyma.04G173000	297.8	0.00114468	PF00005,PF12698	ATP-binding cassette A2
Glyma.17G072000	297.714	0.00016837	PF04484	Family of unknown function (DUF566)
Glyma.01G099700	297.5	0.00179563	PF00156	uracil phosphoribosyltransferase
Glyma.01G006100	297	0.0122065	PF03485,PF05746,PF00750	Arginyl-tRNA synthetase, class Ic
Glyma.08G252600	295	0.00204366	PF00569,PF13764	auxin transport protein (BIG)
Glyma.07G218600	294.667	0.000308134	PF00485	P-loop containing nucleoside triphosphate hydrolases superfamily protein
Glyma.12G224600	293.143	0.000977118	PF00069,PF00400	SPA1-related 3
Glyma.20G135800	293	0.00021675	PF00397,PF01846	pre-mRNA-processing protein 40B
Glyma.02G281000	290.667	0.00454055	PF04851,PF13907,PF00385,PF00271	chromatin remodeling 5
Glyma.20G132900	290	0.00124928	PF13812,PF13041,PF14432	Tetratricopeptide repeat (TPR)-like superfamily protein
Glyma.10G168700	288	0.00617259	PF13424,PF13414,PF00515,PF13844	Tetratricopeptide repeat (TPR)-like superfamily protein
Glyma.18G099000	285.333	0.000243801	PF14438
Glyma.02G060000	284.333	0.000251932	PF05920,PF07526	BEL1-like homeodomain 2
Glyma.08G253800	282	0.000615084	PF14700,PF00940	DNA/RNA polymerases superfamily protein
Glyma.05G185300	282	0.00283988	PF14649
Glyma.17G090200	281	0.00335499	PF13639	SUGAR-INSENSITIVE 3
Glyma.09G196800	279.5	0.00784275	PF03094	Seven transmembrane MLO family protein
Glyma.17G233000	279	0.00243166	PF00397,PF01846	pre-mRNA-processing protein 40A
Glyma.14G033600	275.5	0.00277452	PF04851,PF13907,PF00385,PF00271	chromatin remodeling 5
Glyma.14G152100	269	0.000624378	PF00171	aldehyde dehydrogenase 3H1
Glyma.06G098300	266.667	0.00136537	PF10347,PF10351	Golgi-body localisation protein domain ;RNA pol II promoter Fmp27 protein domain
Glyma.04G020100	266.3	0.00397603	PF07714	ACT-like protein tyrosine kinase family protein
Glyma.11G074600	266	0.00395106	PF02213,PF02201,PF03126	DNA binding;zinc ion binding;nucleic acid binding;nucleic acid binding
Glyma.06G158200	264.111	0.00354055	PF00564,PF00571	CBS / octicosapeptide/Phox/Bemp1 (PB1) domains-containing protein
Glyma.06G092100	261.875	0.000574833	PF00300	Phosphoglycerate mutase family protein
Glyma.13G057300	258	0.00424635	PF12765,PF12830	PHD finger family protein
Glyma.10G123400	257	0.0109108	PF00004	P-loop containing nucleoside triphosphate hydrolases superfamily protein
Glyma.18G048900	255.786	0.000348673	PF16124,PF00570,PF14493,PF00271,PF00270,PF09382	RECQ helicase SIM
Glyma.10G118800	255	0.002179	PF09733	VEFS-Box of polycomb protein
Glyma.05G109300	254	0.000487589		little nuclei4
Glyma.18G137700	253.75	3.13623e-05	PF02902	UB-like protease 1D
Glyma.02G049800	253.2	0.00113381	PF00076	RNA-binding (RRM/RBD/RNP motifs) family protein
Glyma.15G048700	252.5	0.00206623	PF04696	protein-protein interaction regulator family protein
Glyma.20G144400	252	0.00334738		time for coffee
Glyma.19G068800	251.5	0.00477145	PF10497,PF02373	Transcription factor jumonji (jmjC) domain-containing protein
Glyma.08G012000	247	0.00172289	PF01429	methyl-CPG-binding domain protein 13
Glyma.16G088700	246.5	0.000400367	PF00069	Protein kinase superfamily protein
Glyma.13G030600	245	0.000215366	PF00225	P-loop containing nucleoside triphosphate hydrolases superfamily protein
Glyma.19G263900	241.333	0.00325105	PF04182	B-block binding subunit of TFIIIC
Glyma.16G154400	241	0.00162171	PF01585,PF12457,PF07842	GC-rich sequence DNA-binding factor-like protein with Tuftelin interacting domain
Glyma.19G121100	241	0.00300641	PF04818	ENTH/VHS family protein
Glyma.19G249900	241	0.00386858	PF12074,PF13646	ILITYHIA
Glyma.15G219200	240	0.00438504	PF13871,PF13872	RING/FYVE/PHD zinc finger superfamily protein
Glyma.13G319300	239	0.000369264	PF02493	MORN (Membrane Occupation and Recognition Nexus) repeat-containing protein
Glyma.U008400	238.5	0.011401	PF04564	carboxyl terminus of HSC70-interacting protein
Glyma.17G024800	238	0.0010732	PF07496	CW-type Zinc Finger
Glyma.05G030900	237.5	0.00474807	PF01535,PF13041	Pentatricopeptide repeat (PPR) superfamily protein
Glyma.09G000100	236.333	0.000177878	PF06978	ribonuclease Ps
Glyma.14G155900	233.5	0.00392618		Zinc finger C-x8-C-x5-C-x3-H type family protein
Glyma.09G203800	233	0.00452223	PF03137	Major facilitator superfamily protein
Glyma.08G265300	232	0.00043291	PF04818,PF08312,PF00076,PF01805	RNA recognition motif (RRM)-containing protein
Glyma.04G096100	227	0.000291347	PF13385,PF00400,PF16057,PF14844,PF15787,PF02138	binding
Glyma.18G126500	227	0.0271812	PF00854	nitrate transporter 1:2
Glyma.13G311000	224	0.0022978	PF02469	FASCICLIN-like arabinogalactan protein 17 precursor
Glyma.07G170200	223	0.00338435	PF13639	Zinc finger, C3HC4 type (RING finger) family protein
Glyma.11G035300	222	0.0381532	PF03171,PF14226	2-oxoglutarate (2OG) and Fe(II)-dependent oxygenase superfamily protein
Glyma.08G206200	221.5	0.00310948
Glyma.08G186200	219.667	0.000587401	PF15346
Glyma.06G309600	219	0.00156545	PF10539	DCD (Development and Cell Death) domain protein
Glyma.16G128000	218.75	0.00135204	PF01582,PF00931	disease resistance protein (TIR-NBS-LRR class), putative
Glyma.06G181000	218.333	5.03185e-05	PF13251	ARM repeat superfamily protein
Glyma.10G263700	218	0.00024906		PTEN 2
Glyma.08G131800	216	0.00309345		chloroplast sensor kinase
Glyma.12G155900	212	0.0198481	PF00560,PF13855,PF11721,PF07714	Leucine-rich repeat transmembrane protein kinase
Glyma.07G084900	211	0.0007813	PF14309
Glyma.20G019800	210.5	0.00350605	PF00294	pfkB-like carbohydrate kinase family protein
Glyma.13G175200	209	0.000432354	PF15612,PF15613,PF15614,PF05066,PF00046,PF02791	homeobox-1
Glyma.11G160300	209	0.00047008	PF05193,PF00675,PF16187	Insulinase (Peptidase family M16) family protein
Glyma.11G223000	209	0.0098867	PF13540,PF00415	Regulator of chromosome condensation (RCC1) family protein
Glyma.02G163200	208.25	0.00068119	PF01061,PF00005	P-loop containing nucleoside triphosphate hydrolases superfamily protein
Glyma.12G237400	208.125	0.000681932	PF01554	MATE efflux family protein
Glyma.12G175400	208	0.00527614	PF00271	ATP-dependent helicase family protein
Glyma.02G061900	207	0.00791901		Protein of unknown function (DUF1162)
Glyma.11G011700	204	0.00125643	PF03810,PF08389,PF08767	exportin 1A
Glyma.20G072600	204	0.00445077		exocyst subunit exo70 family protein A1
Glyma.16G017400	204	0.00697471	PF00249	Homeodomain-like superfamily protein
Glyma.16G044400	202	0.000460844	PF08389	ARM repeat superfamily protein
Glyma.19G130100	201	0.000233729	PF07058	microtubule-associated proteins 70-1
Glyma.10G188600	201	0.00141618	PF00917	TRAF-like superfamily protein
Glyma.08G152600	201	0.00141618	PF01585,PF01805	SWAP (Suppressor-of-White-APricot)/surp domain-containing protein / D111/G-patch domain-containing protein
Glyma.14G135900	200	0.0072477
Glyma.11G224400	198.557	0.0010403	PF00854	Major facilitator superfamily protein
Glyma.06G217700	198.5	0.00090604		nucleoporin-related
SSU-rRNA-eukarya.103	197	0.00148572		rRNA processing protein-related
Glyma.11G175700	196.667	0.000678985	PF13920	histone mono-ubiquitination 1
Glyma.08G283100	196.5	0.00175529		anthranilate phosphoribosyltransferase, putative
Glyma.13G027100	196.333	0.000902674
Glyma.07G020600	194.714	0.000521815	PF13883	Pyridoxamine 5'-phosphate oxidase family protein
Glyma.17G095900	194.333	9.36371e-05
Glyma.15G263400	194	0.00194461	PF03381	LEM3 (ligand-effect modulator 3) family protein / CDC50 family protein
Glyma.17G003700	193.5	0.0100844	PF12695	alpha/beta-Hydrolases superfamily protein
Glyma.16G006500	193	0.00441015	PF00249	TRF-like 6
Glyma.10G207900	193	0.0294837	PF10475	subunit of exocyst complex 8
Glyma.09G261200	191.75	0.000454777	PF06398,PF00168	C2 calcium/lipid-binding plant phosphoribosyltransferase family protein
Glyma.20G004000	191.667	0.00060047	PF00076	nucleolin like 2
Glyma.20G114300	191.143	0.000228413	PF07714	Protein kinase superfamily protein
Glyma.01G086600	190.5	0.00360761	PF11265	phytochrome and flowering time regulatory protein (PFT1)
Glyma.14G136600	189.5	0.000414783	PF01975	Survival protein SurE-like phosphatase/nucleotidase
Glyma.14G064900	189	0.000315764	PF00153	Mitochondrial substrate carrier family protein
Glyma.10G269700	188	0.0116784	PF00324	bidirectional amino acid transporter 1
Glyma.08G178700	186	0.000279726	PF00515,PF13414,PF01425	translocon at the outer membrane of chloroplasts 64-V
Glyma.06G122500	186	0.0119845	PF11942,PF03439,PF00467	global transcription factor group A2
Glyma.07G223700	185	0.00342295	PF00134	Cyclin family protein
Glyma.11G191100	185	0.00470041	PF10474,PF10475
Glyma.01G238200	184	0.00453238	PF00628,PF16135	Acyl-CoA N-acyltransferase with RING/FYVE/PHD-type zinc finger protein
Glyma.02G044200	183.818	0.00215921	PF03171	2-oxoglutarate (2OG) and Fe(II)-dependent oxygenase superfamily protein
Glyma.13G340300	182.125	0.00107753	PF00111,PF01799,PF03450,PF01315,PF00941,PF02738	xanthine dehydrogenase 1
Glyma.10G159700	182	0.0033386	PF00291	cysteine synthase D1
Glyma.01G073000	182	0.00614928		FAD-linked oxidases family protein
Glyma.20G121300	181.714	0.00133851	PF01569	lipid phosphate phosphatase 2
Glyma.20G183400	181.5	0.00112136	PF12348	ARM repeat superfamily protein
Glyma.10G041700	181	0.000699555	PF02736,PF00612,PF01843,PF00063	myosin 2
Glyma.12G108200	180.619	0.00319538	PF04144	secretory carrier 3
Glyma.01G061500	180.333	0.000122986	PF00069	Protein kinase superfamily protein
Glyma.04G050000	180	0.00100968	PF07797	Protein of unknown function (DUF1639)
Glyma.05G031900	180	0.00631428	PF08389	ARM repeat superfamily protein
Glyma.17G188300	179.522	0.000687604	PF06176,PF03109,PF00144	ABC1 family protein
Glyma.17G070500	179.5	0.014043	PF01536	S-adenosylmethionine decarboxylase
Glyma.17G012600	178	0.00397236	PF00800	arogenate dehydratase 1
Glyma.10G275400	177.714	0.00176617	PF07714	Protein kinase superfamily protein
Glyma.14G126500	177.636	4.12646e-05	PF07885,PF00027,PF11834,PF12796	K+ transporter 1
Glyma.15G137000	177	0.00745617	PF00632	ubiquitin protein ligase 6
Glyma.06G089000	176	0.00321884
Glyma.06G239100	176	0.0105796		Nuclear pore complex protein
Glyma.09G198200	175.308	0.00185619		Transducin/WD40 repeat-like superfamily protein
Glyma.12G042600	175	0.00067117	PF11861,PF01728,PF07780	FtsJ-like methyltransferase family protein
Glyma.18G223300	173	0.00212135	PF00400,PF14844,PF15787,PF02138	WD-40 repeat family protein / beige-related
Glyma.06G311100	171.125	4.20508e-05	PF00931	NB-ARC domain-containing disease resistance protein
Glyma.07G252100	171	0.00253742	PF04851,PF00271,PF14619	P-loop containing nucleoside triphosphate hydrolases superfamily protein
Glyma.01G174500	170.947	0.00241709		Major facilitator superfamily protein
SSU-rRNA-eukarya.134	170.5	0.000459223		rRNA processing protein-related
Glyma.13G024700	170.056	2.39641e-05	PF00682	2-isopropylmalate synthase 1
Glyma.13G325100	170	0.00395307	PF00320	GATA transcription factor 11
Glyma.18G190400	169.5	0.000372773	PF00069	cyclin-dependent kinase B2;2
Glyma.18G264600	169	0.00155358	PF13881	membrane-anchored ubiquitin-fold protein 2
Glyma.16G208800	169	0.00180441	PF02213,PF02201,PF03126	SWIB/MDM2 domain;Plus-3;GYF
Glyma.10G163700	168.6	0.000173551	PF13535,PF00731	phosphoribosylaminoimidazole carboxylase, putative / AIR carboxylase, putative
Glyma.02G149200	168	0.00117527	PF04818,PF00855	Tudor/PWWP/MBT domain-containing protein
Glyma.05G220300	168	0.00142256	PF14604	SH3 domain-containing protein
Glyma.16G213400	167	0.00220619		Peptidoglycan-binding LysM domain-containing protein
Glyma.11G039900	166	0.000324021	PF00169,PF06650,PF12624,PF06101,PF16910,PF16908	pleckstrin homology (PH) domain-containing protein
Glyma.03G102500	166	0.0105651	PF08737
Glyma.18G036300	164.75	2.83422e-05	PF02769,PF13507	purine biosynthesis 4
Glyma.04G096600	164.667	0.00193844	PF10347,PF10351	Golgi-body localisation protein domain ;RNA pol II promoter Fmp27 protein domain
Glyma.19G095000	163.333	0.000662369
Glyma.04G192600	163	0.00518358	PF13422,PF13418,PF13415	Galactose oxidase/kelch repeat superfamily protein
Glyma.03G149900	162.933	0.000685057		oxidoreductase, 2OG-Fe(II) oxygenase family protein
Glyma.03G047000	162.5	0.011239	PF13191	LRR and NB-ARC domains-containing disease resistance protein
Glyma.05G213300	162	0.000144461
Glyma.02G073100	162	0.000981672	PF01585,PF12457,PF07842	GC-rich sequence DNA-binding factor-like protein with Tuftelin interacting domain
Glyma.17G169400	162	0.0147894	PF00225	P-loop containing nucleoside triphosphate hydrolases superfamily protein
Glyma.09G031600	161.5	0.00563609	PF13229	Pectin lyase-like superfamily protein
Glyma.08G349600	161	0.00387637	PF05529	B-cell receptor-associated protein 31-like
Glyma.03G224700	161	0.0165179	PF03106	WRKY family transcription factor
Glyma.16G107600	161	0.0301344	PF03283	Pectinacetylesterase family protein
Glyma.16G219100	160.889	3.73064e-05	PF07714	Protein kinase superfamily protein
Glyma.15G166700	160.5	0.00666751	PF00533,PF04679,PF04675,PF01068	DNA ligase IV
Glyma.05G096000	159.25	0.00214244
Glyma.13G007400	159	0.000786188	PF16719
Glyma.17G107500	158.875	0.000863382	PF12796,PF01529	Ankyrin repeat family protein with DHHC zinc finger domain
Glyma.07G208600	158.5	0.000353872	PF00787,PF08628,PF02194	Phox-associated domain;Phox-like;Sorting nexin, C-terminal
Glyma.09G277700	158.5	0.0015504
Glyma.13G325000	158.091	0.00110443	PF00169,PF01852,PF07059	Pleckstrin homology (PH) and lipid-binding START domains-containing protein
Glyma.10G190500	158	0.00102517	PF01657	plasmodesmata-located protein 2
Glyma.15G236500	158	0.00134759	PF00400	Transducin/WD40 repeat-like superfamily protein
Glyma.17G005500	158	0.0065326		binding
Glyma.09G228100	157	0.000236623	PF07227,PF16312	Protein of unknown function (DUF1423)
Glyma.02G086200	157	0.0116493	PF02358,PF00982	UDP-Glycosyltransferase / trehalose-phosphatase family protein
Glyma.14G140800	155	0.00155129	PF00271,PF00270,PF00476	helicases;ATP-dependent helicases;nucleic acid binding;ATP binding;DNA-directed DNA polymerases;DNA binding
Glyma.07G091200	155	0.00301406	PF03372	DNAse I-like superfamily protein
Glyma.05G209700	154.25	0.00185798	PF00271,PF04851,PF13625	homolog of xeroderma pigmentosum complementation group B 1
Glyma.18G149700	154	0.00246438	PF00201,PF03033	UDP-Glycosyltransferase superfamily protein
Glyma.18G028700	154	0.00290598
Glyma.05G209500	154	0.00301631	PF01388	ARID/BRIGHT DNA-binding domain;ELM2 domain protein
Glyma.09G160200	153.636	0.00139002		Putative integral membrane protein conserved region (DUF2404)
Glyma.08G305100	153.6	0.000466825	PF03798	TRAM, LAG1 and CLN8 (TLC) lipid-sensing domain containing protein
Glyma.15G154300	153	0.00131163	PF00571,PF16561	homolog of yeast sucrose nonfermenting 4
Glyma.09G082800	152	0.00868062
Glyma.09G267100	151.25	0.00282321	PF00400,PF14844,PF15787,PF02138	WD-40 repeat family protein / beige-related
Glyma.01G175100	151	0.000499359	PF00076,PF12220	U1 small nuclear ribonucleoprotein-70K
Glyma.16G098100	151	0.00623154	PF02789,PF00883	Cytosol aminopeptidase family protein
Glyma.15G046400	150.75	0.00216015	PF02493,PF01504	Phosphatidylinositol-4-phosphate 5-kinase family protein
Glyma.07G224600	150	0.000602627	PF13015,PF12999	calmodulin-binding protein
Glyma.08G220400	149.8	2.49376e-05
Glyma.18G010200	149.5	0.00515689	PF01432	Zincin-like metalloproteases family protein
Glyma.01G168600	149	0.0024434	PF03676
Glyma.07G043700	149	0.00715295	PF03914	CCAAT-binding factor
Glyma.18G297900	149	0.00738553		HEAT repeat-containing protein
Glyma.11G078300	148	0.00829049	PF00512,PF02518,PF00072	histidine kinase 1
Glyma.09G273000	147.8	0.000346571		Mitochondrial ATP synthase D chain-related protein
Glyma.04G116700	145.5	0.00233569	PF07719,PF13414,PF00515	peroxin 5
Glyma.08G155000	145	0.00260934
Glyma.06G296800	145	0.00545764	PF08263,PF13855,PF07714	STRUBBELIG-receptor family 3
Glyma.19G176300	145	0.0082893
Glyma.01G079300	144.5	0.00774567	PF09749
Glyma.13G229600	144	0.000806009	PF13837	sequence-specific DNA binding transcription factors
Glyma.18G196200	144	0.00166228	PF00782,PF03919,PF01331	mRNA capping enzyme family protein
Glyma.06G288900	144	0.0149313	PF15612,PF15613,PF15614,PF00046,PF05066,PF02791	Homeodomain-like transcriptional regulator
Glyma.14G131900	143	0.00434331	PF08312
Glyma.02G115200	142.909	0.000149423	PF03106	WRKY DNA-binding protein 57
Glyma.13G305000	142.5	0.000460967	PF00856	SET domain protein 2
Glyma.06G208900	142.5	0.00377652	PF00122,PF12710,PF16209,PF16212	ATPase E1-E2 type family protein / haloacid dehalogenase-like hydrolase family protein
Glyma.13G156500	142.5	0.0092979	PF14709,PF04851,PF02170,PF00271,PF03368,PF00636	dicer-like 4
Glyma.14G053300	142	0.00055509	PF00218	Aldolase-type TIM barrel family protein
Glyma.14G218000	141.5	0.0051074	PF00098,PF03159	5'-3' exoribonuclease 3
Glyma.02G312200	141	0.0275136	PF16206,PF16213,PF09324,PF12783,PF01369	SEC7-like guanine nucleotide exchange family protein
Glyma.09G046800	140.5	0.000633389	PF00571,PF16561	homolog of yeast sucrose nonfermenting 4
Glyma.09G244700	139	0.00106907	PF01713,PF08590	smr (Small MutS Related) domain-containing protein
Glyma.12G050100	138.4	0.000989513	PF00564,PF02042	Plant regulator RWP-RK family protein
Glyma.02G168900	138.333	0.000313975	PF05843,PF00575	RNA binding;RNA binding
Glyma.20G150500	138	0.00578026	PF09742
Glyma.15G048400	137.667	2.58678e-05	PF03470,PF03468	XS domain-containing protein / XS zinc finger domain-containing protein-related
Glyma.04G236600	137.5	0.00242292	PF00069,PF04755	OBP3-responsive gene 1
Glyma.06G143500	137	0.000651336	PF13638,PF00773	ribonuclease II family protein
Glyma.07G062500	137	0.00167952		GRIP-related ARF-binding domain-containing protein 1
Glyma.02G101200	137	0.0024765
Glyma.02G109900	135.75	0.000106879	PF14443	ATP/GTP-binding protein family
Glyma.12G070100	135	0.000441413	PF03914,PF07540	binding
Glyma.02G161900	135	0.000814374		hydroxyproline-rich glycoprotein family protein
Glyma.19G153900	135	0.00140454	PF04818,PF00855	Tudor/PWWP/MBT domain-containing protein
Glyma.10G172500	135	0.00368487		RING/FYVE/PHD zinc finger superfamily protein
Glyma.10G037300	134.667	0.000128948	PF02463,PF06470	Structural maintenance of chromosomes (SMC) family protein
Glyma.10G030000	134.545	1.93583e-05	PF13385,PF00400,PF14844,PF02138	Beige/BEACH domain ;WD domain, G-beta repeat protein
Glyma.07G103600	134	0.00877926	PF00684,PF01556,PF00226	Molecular chaperone Hsp40/DnaJ family protein
Glyma.20G065900	133.5	0.0010965	PF00012	heat shock protein 70 (Hsp 70) family protein
Glyma.09G235900	133	0.0217351	PF00013	RNA-binding KH domain-containing protein
Glyma.08G055400	132.667	0.000268534		Outer arm dynein light chain 1 protein
Glyma.09G209900	132.5	0.000826812	PF00503	extra-large GTP-binding protein 3
Glyma.13G208800	132.5	0.00383111	PF09335	SNARE associated Golgi protein family
Glyma.07G249600	132	0.00643777	PF07496	CW-type Zinc Finger
Glyma.13G003700	131.5	0.000456057	PF00012	heat shock protein 70 (Hsp 70) family protein
Glyma.07G070700	131.2	7.73347e-05	PF09497	RNA polymerase II transcription mediators
Glyma.11G203400	131.167	5.9391e-05	PF03169	YELLOW STRIPE like 7
Glyma.02G136800	131	0.000852039	PF00787,PF08628,PF02194	Phox-associated domain;Phox-like;Sorting nexin, C-terminal
Glyma.16G035100	131	0.00223625	PF04851,PF08880,PF00271	transcription regulatory protein SNF2, putative
Glyma.04G230800	131	0.00614913
Glyma.18G217100	130.5	0.00099562	PF02535	ZIP metal ion transporter family
Glyma.14G183000	130.333	0.000467291	PF00627,PF14377,PF06012,PF06025,PF00632	ubiquitin-protein ligase 2
Glyma.11G100400	130	0.000516763	PF04818,PF00855	Tudor/PWWP/MBT domain-containing protein
Glyma.01G010800	130	0.000846866		protein dimerizations
Glyma.12G120600	130	0.00126755	PF08477	RAC-like 3
Glyma.09G211000	129.5	0.00114027	PF14703,PF13967,PF02714	early-responsive to dehydration stress protein (ERD4)
Glyma.02G200000	129	0.00815898	PF00098,PF00076	arginine/serine-rich zinc knuckle-containing protein 33
Glyma.10G276500	129	0.0400809	PF00098,PF00076	RNA-binding (RRM/RBD/RNP motifs) family protein with retrovirus zinc finger-like domain
Glyma.15G061500	128	0.00784219
Glyma.05G199200	127.667	0.000189597	PF00262	calnexin 1
Glyma.07G035600	127.6	3.91974e-05	PF07728	ATPases;nucleotide binding;ATP binding;nucleoside-triphosphatases;transcription factor binding
Glyma.13G123700	127.5	0.00261781	PF13476,PF06470	Structural maintenance of chromosomes (SMC) family protein
Glyma.16G209600	127.25	0.0128874		Putative integral membrane protein conserved region (DUF2404)
Glyma.20G112800	126.714	2.39656e-05	PF03439	kow domain-containing transcription factor 1
Glyma.08G267900	126.667	0.00285287	PF00789,PF14555,PF13899	UBX domain-containing protein
Glyma.07G019000	126.5	0.0129748	PF06068	P-loop containing nucleoside triphosphate hydrolases superfamily protein
Glyma.20G070500	125.667	0.00151165	PF08282,PF08472	Sucrose-6F-phosphate phosphohydrolase family protein
Glyma.07G147700	125.5	0.000291997	PF00646,PF01167	tubby like protein 1
Glyma.11G075100	125.5	0.00774138	PF11995,PF00225	ATP binding microtubule motor family protein
Glyma.08G227900	125	2.76597e-05
Glyma.16G010400	125	0.000970396	PF12090
Glyma.03G130000	124.571	4.11984e-05	PF00072	response regulator 9
Glyma.11G077200	124	0.00121906		Chalcone-flavanone isomerase family protein
Glyma.08G229400	124	0.0013758	PF00035,PF00271,PF07717,PF04408	DEA(D/H)-box RNA helicase family protein
Glyma.13G339800	124	0.00416375	PF01554	MATE efflux family protein
Glyma.08G356500	123.333	0.000584044	PF00564,PF07714	Protein kinase superfamily protein with octicosapeptide/Phox/Bem1p domain
Glyma.10G211600	122.5	0.0032021	PF04715,PF00117,PF00425	para-aminobenzoate (PABA) synthase family protein
Glyma.19G095700	122	0.000931718	PF02213	GYF domain-containing protein
Glyma.19G102500	122	0.00196111	PF00777	MALE GAMETOPHYTE DEFECTIVE 2
Glyma.20G119100	121.667	0.00110389	PF00481	Protein phosphatase 2C family protein
Glyma.14G000300	121	0.00953623	PF16206,PF16213,PF09324,PF12783,PF01369	SEC7-like guanine nucleotide exchange family protein
Glyma.19G132200	120	0.00376554	PF09713	Plant protein 1589 of unknown function
Glyma.04G229300	120	0.0184231	PF00076	SER/ARG-rich protein 34A
Glyma.08G148500	119.5	0.00104039	PF00010	basic helix-loop-helix (bHLH) DNA-binding superfamily protein
Glyma.11G095300	119.5	0.00925656	PF00226,PF13414	Heat shock protein DnaJ with tetratricopeptide repeat
Glyma.12G242300	119	0.000404846	PF01926,PF02212,PF00169,PF01031	dynamin-like 3
Glyma.17G092200	119	0.000956496	PF08711	BAH domain ;TFIIS helical bundle-like domain
Glyma.17G175900	119	0.00282565	PF10607
Glyma.10G232300	119	0.00586284	PF05063	Methyltransferase MT-A70 family protein
Glyma.20G238000	118.733	0.00403185	PF00169,PF13091,PF00614	phospholipase D P1
Glyma.08G256300	118.5	0.000958279		little nuclei1
Glyma.20G022400	118.222	1.78707e-05	PF13920	SBP (S-ribonuclease binding protein) family protein
Glyma.09G074400	118	0.00368631
Glyma.19G019200	118	0.00487246	PF00690,PF00702,PF00122	H(+)-ATPase 11
Glyma.05G244800	118	0.00553948		golgin candidate 2
Glyma.04G048300	118	0.0119719	PF08491	FAD/NAD(P)-binding oxidoreductase family protein
Glyma.12G226900	117.667	0.000547795
Glyma.18G075000	117.5	0.00746625	PF17125,PF01189	S-adenosyl-L-methionine-dependent methyltransferases superfamily protein
Glyma.18G248200	117.5	0.0140826	PF00076	RNA-binding (RRM/RBD/RNP motifs) family protein
Glyma.04G184600	117	0.00532678	PF00787,PF13901	Phox (PX) domain-containing protein
Glyma.10G209100	116.857	0.00159913	PF02338	Cysteine proteinases superfamily protein
Glyma.10G270000	116.8	0.00130356	PF01569	lipid phosphate phosphatase 2
Glyma.13G027300	116.333	1.33526e-05	PF14647,PF14648
Glyma.16G116200	116.25	0.0033767		Transducin/WD40 repeat-like superfamily protein
Glyma.07G163100	116	0.00335096
Glyma.02G093600	116	0.0200358
Glyma.09G144200	115	0.00432118	PF03141	S-adenosyl-L-methionine-dependent methyltransferases superfamily protein
Glyma.08G091500	115	0.00844472	PF00282	glutamate decarboxylase
Glyma.05G112600	115	0.00844472	PF13920	RING/U-box superfamily protein
Glyma.18G280500	114.5	0.00104211		little nuclei1
Glyma.06G175900	114	0.00426758	PF07714	FUS3-complementing gene 2
Glyma.07G144700	113.333	0.000106275	PF00083	phosphate transporter 4;2
Glyma.01G147800	113	0.000754524	PF01852,PF07059	ENHANCED DISEASE RESISTANCE 2
Glyma.10G292100	113	0.0036983
Glyma.16G194400	113	0.0170983	PF01429	methyl-CPG-binding domain protein 13
Glyma.02G119700	113	0.0351029	PF00069	Protein kinase superfamily protein
Glyma.13G346300	112	0.00111678	PF00564,PF02042	Plant regulator RWP-RK family protein
Glyma.08G175500	112	0.00445624	PF13423	ubiquitin-specific protease 25
Glyma.09G085300	112	0.00533671	PF01235,PF03522	cation-chloride co-transporter 1
Glyma.09G192000	111	0.00113236	PF14309
Glyma.09G114500	111	0.0131801	PF04129,PF15277	exocyst complex component sec3A
Glyma.08G135900	111	0.0232457	PF07534	TLD-domain containing nucleolar protein
Glyma.08G279800	109.541	0.00173324	PF00225	kinesin like protein for actin based chloroplast movement 1
Glyma.08G021400	109.25	0.00430916	PF07765	COP1-interactive protein 1
Glyma.15G166200	109	0.000312762	PF00046,PF00628	pathogenesis related homeodomain protein A
Glyma.05G137100	109	0.00113257	PF06217	basic pentacysteine1
Glyma.05G131500	109	0.00114499	PF06465,PF00628,PF04851,PF00385,PF00271	chromatin remodeling 4
Glyma.08G287600	109	0.00129624	PF13394,PF04055	Radical SAM superfamily protein
Glyma.11G102600	109	0.00432207	PF00397,PF01846	pre-mRNA-processing protein 40C
Glyma.13G024500	108.709	4.45771e-06
Glyma.13G072400	108	0.00176172
Glyma.16G118800	108	0.00213728	PF00132,PF06426	serine acetyltransferase 3;2
Glyma.05G102400	108	0.00330784	PF13371,PF00515,PF13414	Tetratricopeptide repeat (TPR)-like superfamily protein
Glyma.14G137100	107.25	5.87833e-05	PF01396,PF13368,PF01751,PF01131	DNA topoisomerase, type IA, core
Glyma.18G034000	106	0.00115842	PF00854	Major facilitator superfamily protein
Glyma.18G233700	106	0.00130466	PF03931,PF01466	SKP1-like 21
Glyma.09G274600	105.667	0.000361928	PF08263,PF00560,PF13855,PF00069	Leucine-rich receptor-like protein kinase family protein
Glyma.18G053700	105.5	0.00138161	PF05193,PF00675,PF16187	Insulinase (Peptidase family M16) family protein
Glyma.01G068000	105	0.00128635	PF02518,PF00183	Chaperone protein htpG family protein
Glyma.13G037400	105	0.00151136	PF05631	Major facilitator superfamily protein
Glyma.17G139200	104.5	0.0113137	PF15413,PF01237	OSBP(oxysterol binding protein)-related protein 2A
Glyma.14G044500	104	0.000396168	PF00917,PF13423,PF14533,PF12436	ubiquitin-specific protease 12
Glyma.01G131400	104	0.000790433	PF05184,PF03489	saposin B domain-containing protein
Glyma.16G040500	104	0.0184591	PF07797	Protein of unknown function (DUF1639)
Glyma.06G093500	103	0.00155962	PF01753,PF13423	ubiquitin-specific protease 16
Glyma.06G108500	103	0.0031759	PF13831,PF13832	PHD finger family protein
Glyma.20G221300	102.571	0.000138356	PF14365,PF03080	Protein of Unknown Function (DUF239)
Glyma.09G136900	102.5	0.00107903	PF00753,PF07521,PF10996,PF13299	cleavage and polyadenylation specificity factor 100
Glyma.07G118800	102	0.00168667	PF00022	actin-related protein 4
Glyma.11G005300	102	0.00187727	PF00628,PF16135	Acyl-CoA N-acyltransferase with RING/FYVE/PHD-type zinc finger protein
Glyma.18G245600	102	0.00560421	PF00013	RNA-binding KH domain-containing protein
Glyma.04G191600	102	0.013674	PF13181,PF13424,PF13414,PF00515	tetratricopeptide repeat (TPR)-containing protein
Glyma.10G289700	102	0.0253063
Glyma.05G205100	101	0.00521093	PF01429	methyl-CPG-binding domain protein 13
Glyma.04G087300	101	0.00592337
Glyma.09G136800	100.5	0.00327653
Glyma.11G248500	100.5	0.0100729	PF00069	Protein kinase superfamily protein
Glyma.06G068000	100.125	0.00195972
Glyma.08G356300	100	0.00203254	PF07800	Protein of unknown function (DUF1644)
Glyma.01G245700	100	0.00310484	PF14308,PF00226	DNAJ heat shock N-terminal domain-containing protein
Glyma.07G268200	100	0.00606872		binding
Glyma.18G267200	100	0.0265947	PF07897,PF16135,PF16136	ABI five binding protein 3
Glyma.02G086100	100	0.0292711	PF05183	RNA-dependent RNA polymerase 1
Glyma.01G031900	99.6667	0.00384028	PF02358,PF00982	trehalose-phosphatase/synthase 9
Glyma.13G075300	99	0.00123318	PF07744,PF00076	RNA recognition motif (RRM)-containing protein
Glyma.08G166300	98.9091	0.00211195
Glyma.16G130000	98.8889	0.000982424	PF00076	RNA-binding (RRM/RBD/RNP motifs) family protein
Glyma.16G034400	98	0.00139269		Transducin/WD40 repeat-like superfamily protein
Glyma.13G146900	98	0.0101627	PF01937,PF03630	pantothenate kinase 2
Glyma.07G223100	97.9	0.00117589	PF13920	SBP (S-ribonuclease binding protein) family protein
Glyma.02G275900	97.5	0.000718879	PF14531,PF03822	CBL-interacting protein kinase 3
Glyma.06G191400	97.5	0.00502436	PF12698,PF00005	ABC2 homolog 6
Glyma.19G105500	97.1061	0.00109674	PF06839	GRF zinc finger / Zinc knuckle protein
Glyma.18G253900	97	0.0013951	PF08164,PF13339	rRNA processing protein-related
Glyma.09G157300	97	0.00227862	PF08642
Glyma.06G063400	96	0.00182022	PF00628,PF08074,PF04851,PF00271,PF06465,PF00385,PF06461	chromatin remodeling factor CHD3 (PICKLE)
Glyma.04G133800	96	0.00186293	PF11957	nuclear matrix protein-related
Glyma.10G136700	95.6607	0.00025665	PF00646	F-box/RNI-like/FBD-like domains-containing protein
Glyma.06G145900	95.5	4.80808e-05	PF10408,PF00622	related to KPC1
Glyma.13G178200	95.5	0.00647512	PF10374,PF10373	Telomerase activating protein Est1
Glyma.11G007100	95.3333	0.000562735	PF07714	Protein kinase superfamily protein
Glyma.01G164600	95	0.00306275	PF00141	ascorbate peroxidase 3
Glyma.13G143600	95	0.0197112	PF07724,PF02933,PF05496,PF02359	ATPase, AAA-type, CDC48 protein
Glyma.13G360400	94.5	0.000753594	PF09405	CASC3/Barentsz eIF4AIII binding
Glyma.05G176400	94.5	0.000829102	PF00076	RNA-binding (RRM/RBD/RNP motifs) family protein
Glyma.09G087900	94.5	0.00193671	PF04050,PF02854	binding;RNA binding
Glyma.06G260700	94.5	0.00664375	PF00400	Transducin/WD40 repeat-like superfamily protein
Glyma.01G194700	94.0325	0.0001894	PF13508,PF00696	N-acetyl-l-glutamate synthase 1
Glyma.17G143500	94	0.000866856	PF03016	Exostosin family protein
Glyma.05G077300	94	0.0147915
Glyma.17G161800	94	0.0147915	PF07714	Protein kinase superfamily protein
Glyma.19G252600	94	0.015101	PF00170,PF07777,PF16596	G-box binding factor 3
Glyma.09G184700	93.8	0.00129345	PF03372	DNAse I-like superfamily protein
Glyma.19G167900	93	0.00124117	PF05033,PF00856,PF10440	SET-domain containing protein lysine methyltransferase family protein
Glyma.10G175300	93	0.00169713
Glyma.01G137300	93	0.00594597	PF12352	golgi snare 12
Glyma.09G046500	93	0.00638559	PF10557,PF00888	cullin 1
Glyma.15G237300	92.6667	0.000300663	PF03145	Protein with RING/U-box and TRAF-like domains
Glyma.16G026900	92.375	0.000124424	PF03321	Auxin-responsive GH3 family protein
Glyma.16G032700	92.1111	0.000140552	PF00069	Protein kinase superfamily protein
Glyma.11G181500	92	0.000140701	PF02338	OTU-like cysteine protease family protein
Glyma.16G074700	92	0.000207796	PF03141	S-adenosyl-L-methionine-dependent methyltransferases superfamily protein
Glyma.09G063100	92	0.00368301	PF00400,PF12265	Transducin family protein / WD-40 repeat family protein
Glyma.02G174100	91.75	8.08777e-05	PF04851,PF07529,PF00271	SNF2 domain-containing protein / helicase domain-containing protein
Glyma.19G193700	91.4643	0.000628801	PF01156	uridine-ribohydrolase 1
Glyma.03G188200	91.3333	0.000470171	PF00076,PF14111
Glyma.06G074700	91	0.000914644
Glyma.04G232700	91	0.0081412	PF08314
Glyma.01G159900	90.8333	0.00411323	PF01465	Golgi-localized GRIP domain-containing protein
Glyma.18G021100	90.6667	0.000245565	PF01019	gamma-glutamyl transpeptidase 1
Glyma.18G181200	90.5	0.00197693	PF02207	proteolysis 6
Glyma.16G131900	90.5	0.00274014	PF13589	compromised recognition of TCV 1
Glyma.13G182800	90.4783	0.000169555	PF06749	Protein of unknown function (DUF1218)
Glyma.02G192600	90.2143	0.00190529	PF06886	TPX2 (targeting protein for Xklp2) protein family
Glyma.18G298500	89.3333	0.00150283	PF07786	Protein of unknown function (DUF1624)
Glyma.10G148600	89	0.00262625	PF01612	Polynucleotidyl transferase, ribonuclease H-like superfamily protein
Glyma.07G018200	89	0.0373526	PF13326	photosystem II 11 kDa protein-related
Glyma.16G137300	88.9048	0.000438353	PF05729,PF13676	disease resistance protein (TIR-NBS-LRR class), putative
Glyma.12G022300	88.7308	0.00840815	PF00202	Pyridoxal phosphate (PLP)-dependent transferases superfamily protein
Glyma.09G262000	88.6667	0.00373153	PF02254,PF00999	K+ efflux antiporter 2
Glyma.05G200800	88.6	6.08385e-05	PF02309,PF02362,PF06507	auxin response factor 2
Glyma.10G101500	88.5	0.0227663
Glyma.01G094800	88.3333	0.000324403	PF02493	Histone H3 K4-specific methyltransferase SET7/9 family protein
Glyma.12G236900	88	0.000900085	PF09725
Glyma.19G222700	88	0.00193126	PF00481	Protein phosphatase 2C family protein
Glyma.06G152900	88	0.00411184	PF02365	NAC domain containing protein 82
Glyma.07G263300	87.75	0.00141443	PF14703,PF13967,PF02714	ERD (early-responsive to dehydration stress) family protein
Glyma.06G097800	87.3333	0.00372615	PF16057,PF13385,PF00400,PF14844,PF15787,PF02138	binding
Glyma.17G031500	87	0.00108235	PF14383,PF14309
Glyma.03G080200	87	0.00169963
Glyma.02G204300	87	0.0121505	PF00027,PF00520	cyclic nucleotide gated channel 5
Glyma.09G149000	87	0.0190889	PF01486,PF00319	AGAMOUS-like 6
Glyma.10G204900	86.8571	7.00252e-05	PF13920,PF10269	Transmembrane Fragile-X-F-associated protein
Glyma.17G203800	86.8	0.00216438	PF13639	RING/U-box superfamily protein
Glyma.18G284500	86.5714	0.00630521
Glyma.02G212700	86.5	0.00673654
Glyma.18G296700	86.3333	0.00748662
Glyma.12G054000	86	0.000784859	PF00232	beta glucosidase 17
Glyma.07G063300	86	0.000858486	PF00931	NB-ARC domain-containing disease resistance protein
Glyma.02G027400	86	0.00168691	PF00072	response regulator 3
Glyma.09G120200	86	0.00227546	PF03989,PF00521	DNA GYRASE A
Glyma.04G026100	86	0.00560197	PF00415	Regulator of chromosome condensation (RCC1) family protein
Glyma.14G145000	86	0.00699719	PF01661	appr-1-p processing enzyme family protein
Glyma.13G236800	85.6087	1.21179e-05	PF00642	Zinc finger C-x8-C-x5-C-x3-H type family protein
Glyma.14G012400	85.3684	0.0022706	PF03169	oligopeptide transporter 1
Glyma.01G149500	85.3333	0.00256218
Glyma.01G000200	85.3333	0.0149002
Glyma.07G248000	85.3	0.00152715	PF00481	Protein phosphatase 2C family protein
Glyma.11G008600	85	0.00112805		RING/FYVE/PHD zinc finger superfamily protein
Glyma.13G027200	85	0.00253211
Glyma.20G154200	85	0.00741313	PF01486,PF00319	AGAMOUS-like 42
Glyma.10G016400	84.8333	0.00236856	PF01280	Ribosomal protein L19e family protein
Glyma.U032300	84.6667	0.00303425	PF03081	exocyst subunit exo70 family protein A1
Glyma.10G135600	84.6667	0.00328839	PF00646	F-box/RNI-like superfamily protein
Glyma.10G171500	84.5	0.000830033	PF14237,PF00076	RNA binding (RRM/RBD/RNP motifs) family protein
Glyma.17G102800	84.5	0.0123863	PF10409,PF02181	actin binding
Glyma.05G031000	84.5	0.0298727	PF00443,PF04781,PF04780	Ubiquitin carboxyl-terminal hydrolase-related protein
Glyma.10G168300	84.4167	0.000182708	PF14365,PF03080	Protein of Unknown Function (DUF239)
Glyma.07G074800	84.3333	0.000302475	PF00271,PF00270	P-loop containing nucleoside triphosphate hydrolases superfamily protein
Glyma.16G048800	84.25	0.00012699	PF02140,PF01301	beta-galactosidase 7
Glyma.02G055100	84.25	0.00359854		Chaperone DnaJ-domain superfamily protein
Glyma.08G094500	84.25	0.0387177	PF05623	Protein of unknown function (DUF789)
Glyma.09G002300	84	0.000916672	PF03476,PF03473,PF00266	molybdenum cofactor sulfurase (LOS5) (ABA3)
Glyma.20G202100	84	0.00103066	PF00917	TRAF-like superfamily protein
Glyma.02G261800	84	0.00154999	PF00271,PF00176	chromatin remodeling 42
Glyma.11G136700	84	0.00185756	PF00806,PF07990	pumilio 2
Glyma.10G265900	84	0.00303015	PF00085,PF04777	quiescin-sulfhydryl oxidase 1
Glyma.01G217100	84	0.00741784	PF13426,PF07714	PAS domain-containing protein tyrosine kinase family protein
Glyma.19G248600	84	0.0101828	PF13499	Calcium-binding EF-hand family protein
Glyma.12G008500	83.8571	0.000789032	PF07227,PF16312	Protein of unknown function (DUF1423)
Glyma.19G102000	83.5	0.00091019	PF00010	basic helix-loop-helix (bHLH) DNA-binding superfamily protein
Glyma.18G266900	83.5	0.00815197	PF03639	glycosyl hydrolase family 81 protein
Glyma.13G006200	83.3333	0.00114013	PF00569,PF00249	homolog of yeast ADA2 2A
Glyma.02G055700	83.3333	0.00486461
Glyma.16G012100	83	0.00159689	PF03914	CCAAT-binding factor
Glyma.14G119400	83	0.00175097	PF09377,PF01172	sequence-specific DNA binding transcription factors
Glyma.02G046900	83	0.00182508	PF02809,PF13519	regulatory particle non-ATPase 10
Glyma.17G052500	83	0.00198284	PF00481	homology to ABI2
Glyma.03G202700	83	0.00630492	PF08626,PF12739	Tetratricopeptide repeat (TPR)-like superfamily protein
Glyma.06G115600	83	0.00686011	PF00249,PF04433,PF16495	SWITCH/sucrose nonfermenting 3C
Glyma.09G184300	83	0.0156377	PF00170,PF00464	TGACG motif-binding factor 6
Glyma.20G192300	83	0.0219388	PF02365	NAC domain containing protein 50
Glyma.04G122400	82.75	0.0063898	PF10539	DCD (Development and Cell Death) domain protein
Glyma.16G207900	82.625	0.000421753	PF08642
Glyma.08G071200	82.3889	0.00497601	PF00005,PF01061	white-brown complex homolog protein 11
Glyma.12G190800	82	0.000152668	PF13639	RING-H2 group F2A
Glyma.02G146900	82	0.00630556		time for coffee
Glyma.16G095200	82	0.00649608	PF00170,PF07777,PF16596	basic region/leucine zipper transcription factor 16
Glyma.13G337800	82	0.0182066	PF03152	Ubiquitin fusion degradation UFD1 family protein
Glyma.07G113200	81.7876	0.00253045	PF03547	Auxin efflux carrier family protein
Glyma.11G117900	81.6667	0.000864949
Glyma.03G252300	81.6667	0.000967345	PF12074,PF13646	ILITYHIA
Glyma.18G044000	81.125	0.0099691	PF16457,PF01363,PF08381,PF00415	Regulator of chromosome condensation (RCC1) family with FYVE zinc finger domain
Glyma.20G058000	81	0.00111302	PF00368	hydroxy methylglutaryl CoA reductase 1
Glyma.17G193800	81	0.00181527	PF07575
Glyma.19G003100	81	0.00277182	PF04724	beta-1,4-N-acetylglucosaminyltransferase family protein
Glyma.12G236100	81	0.00439284	PF00271,PF00176	SNF2 domain-containing protein / helicase domain-containing protein
Glyma.04G075200	81	0.0228228	PF09496
Glyma.20G185600	80.5	0.00117922	PF13920,PF10269	Transmembrane Fragile-X-F-associated protein
Glyma.12G027100	80.4667	8.66731e-05	PF13676,PF00931	disease resistance protein (TIR-NBS-LRR class), putative
Glyma.09G259400	80	0.000249766	PF09497	RNA polymerase II transcription mediators
Glyma.06G324500	80	0.000991938	PF03467	Smg-4/UPF3 family protein
Glyma.09G169500	80	0.00125799	PF07714	Protein kinase superfamily protein
Glyma.15G070100	80	0.00310113	PF13923,PF00271,PF00176	SNF2 domain-containing protein / helicase domain-containing protein / zinc finger protein-related
Glyma.12G089700	80	0.00395789	PF04810,PF04815,PF04811	sec23/sec24 transport family protein
Glyma.14G094400	80	0.00837438	PF07714,PF14381	Protein kinase superfamily protein
Glyma.07G218100	80	0.00837438	PF01535,PF13041	Pentatricopeptide repeat (PPR) superfamily protein
Glyma.09G031900	80	0.0221049	PF00098,PF11923,PF05670,PF05833	zinc knuckle (CCHC-type) family protein
Glyma.16G116400	80	0.0250334	PF08147	hydrolases, acting on acid anhydrides, in phosphorus-containing anhydrides;ATP-dependent helicases;nucleic acid binding;ATP binding;RNA binding;helicases
Glyma.02G051800	80	0.0387622	PF13589	compromised recognition of TCV 1
Glyma.02G224600	79.9091	0.000961373	PF00854	peptide transporter 1
Glyma.15G176200	79.6	9.72529e-05
Glyma.03G133700	79.5	0.00102777	PF04851,PF00271,PF13892	INO80 ortholog
Glyma.07G241500	79.5	0.0091979	PF04802	binding
Glyma.04G071300	79.3333	0.00259779
Glyma.06G056500	79	0.000966382	PF02736,PF00612,PF01843,PF00063	myosin, putative
Glyma.04G151500	79	0.00188389	PF03357	SNF7 family protein
Glyma.07G122000	79	0.00366302	PF14572,PF13793	Phosphoribosyltransferase family protein
Glyma.19G241300	79	0.0243009	PF00400,PF11816	Transducin/WD40 repeat-like superfamily protein
LSU-rRNA-eukarya.14	79	0.0326001		rRNA processing protein-related
Glyma.12G155400	79	0.0380621	PF00069	Protein kinase superfamily protein
Glyma.08G229600	78.5455	0.00011962	PF03343	SART-1 family
Glyma.08G111400	78.5	0.00389678	PF13020	Histidine kinase-, DNA gyrase B-, and HSP90-like ATPase family protein
Glyma.07G006300	78.5	0.0107454	PF00012	Heat shock protein 70 (Hsp 70) family protein
Glyma.10G284400	78.4286	0.00054181	PF07714	ACT-like protein tyrosine kinase family protein
Glyma.18G232900	78	0.00555146	PF09497	RNA polymerase II transcription mediators
Glyma.04G110900	78	0.0300151	PF06588	Galactose-binding protein
Glyma.09G283600	77.9	0.0032482	PF02375,PF02373	Transcription factor jumonji (jmj) family protein / zinc finger (C5HC2 type) family protein
Glyma.10G187600	77.75	0.0192046
Glyma.10G136500	77.5	0.00543361
Glyma.05G046000	77.2857	0.00102297	PF00069	Protein kinase superfamily protein
Glyma.04G018100	77.2667	0.000184157	PF08142,PF04950
Glyma.07G216600	77.25	0.00133947	PF00118,PF01504	FORMS APLOID AND BINUCLEATE CELLS 1C
Glyma.09G213700	77.2424	0.000145679
Glyma.02G251900	77.0667	0.0024664	PF00153	Mitochondrial substrate carrier family protein
Glyma.07G270200	77.0556	0.00343144	PF12695	alpha/beta-Hydrolases superfamily protein
Glyma.17G000600	77	0.00146685	PF03372	Endonuclease/exonuclease/phosphatase family protein
Glyma.18G109800	77	0.0029864	PF04840,PF04841	vacuoleless1 (VCL1)
Glyma.06G148700	77	0.00758724	PF13893,PF15519,PF00076	Splicing factor, CC1-like
Glyma.18G256000	76.8462	0.000315054	PF00847	Integrase-type DNA-binding superfamily protein
Glyma.17G213500	76.5	0.00156827	PF00564,PF13414	Octicosapeptide/Phox/Bem1p (PB1) domain-containing protein / tetratricopeptide repeat (TPR)-containing protein
Glyma.06G045200	76	0.00184941	PF12174,PF05236	TBP-associated factor 4
Glyma.10G199900	76	0.00217365		DNA binding
Glyma.09G018700	76	0.00243551	PF00730
Glyma.07G012400	76	0.00243551	PF07303	dentin sialophosphoprotein-related
Glyma.08G006500	76	0.00285579	PF00262	calnexin 1
Glyma.08G210000	76	0.00348129	PF04003
Glyma.11G118900	76	0.0139091	PF00569,PF00249,PF04433,PF16495	DNA-binding family protein
Glyma.06G173600	75.75	0.00534047
Glyma.20G229000	75.6667	0.00106009	PF00291	cysteine synthase D1
Glyma.13G186600	75.5	0.00120014	PF00083	zinc induced facilitator-like 1
Glyma.03G146200	75.5	0.00175931	PF04130	spindle pole body component 98
Glyma.09G238100	75.5	0.00207457	PF01490	Transmembrane amino acid transporter family protein
Glyma.15G171400	75.3333	0.00657913	PF11705
Glyma.07G199200	75.0769	0.000536878	PF00153	Mitochondrial substrate carrier family protein
Glyma.04G245700	75	0.00413333	PF08729	wound-responsive family protein
Glyma.05G155100	75	0.0243536	PF00271,PF00270	P-loop containing nucleoside triphosphate hydrolases superfamily protein
Glyma.05G242800	75	0.0312738	PF00270,PF00035,PF00271,PF07717,PF04408	DEA(D/H)-box RNA helicase family protein
Glyma.16G062000	74.7143	0.00175774	PF13964,PF13418	Galactose oxidase/kelch repeat superfamily protein
Glyma.13G218500	74.5	0.00871931	PF00888	cullin4
Glyma.15G120300	74.5	0.0107946		binding
Glyma.20G178500	74.3333	0.000487263	PF00249	Duplicated homeodomain-like superfamily protein
Glyma.17G175000	74.1111	0.000632485
Glyma.06G112300	74	0.00157161	PF09649
Glyma.17G062900	74	0.00226786	PF11559	Afadin/alpha-actinin-binding protein
Glyma.20G166300	74	0.0048879	PF13898	ubiquitin interaction motif-containing protein
Glyma.06G218300	74	0.00814559	PF00459	myo-inositol monophosphatase like 1
Glyma.07G218700	74	0.0101723		Transducin/WD40 repeat-like superfamily protein
Glyma.19G006000	74	0.0175402	PF00397,PF04851,PF00271	DEAD box RNA helicase family protein
Glyma.10G211400	73.6667	0.0002344	PF01264	chorismate synthase, putative / 5-enolpyruvylshikimate-3-phosphate phospholyase, putative
Glyma.01G152400	73.5	0.00619719
Glyma.06G037600	73.25	0.020071	PF00076	RNA-binding protein 47C
Glyma.03G184600	73	0.000223159	PF13639	Transducin/WD40 repeat-like superfamily protein
Glyma.15G136300	73	0.0021203	PF00397,PF04851,PF00271	DEAD box RNA helicase family protein
Glyma.07G069800	73	0.0021203	PF03931,PF01466	SKP1-like 21
Glyma.05G156000	73	0.00341339	PF07983,PF00332	O-Glycosyl hydrolases family 17 protein
Glyma.17G038700	72.9091	0.000766201	PF12711,PF00225	phragmoplast orienting kinesin 1
Glyma.12G135500	72.6154	0.00411441	PF13812,PF01535	Tetratricopeptide repeat (TPR)-like superfamily protein
Glyma.07G021400	72.5833	0.00400886
Glyma.06G194100	72.5	0.013603	PF12906,PF12428	RING/FYVE/PHD zinc finger superfamily protein
Glyma.16G046600	72.4444	0.0040201	PF13202,PF13499,PF00153	Mitochondrial substrate carrier family protein
Glyma.17G253000	72.3913	0.00226663	PF03765,PF00650	Sec14p-like phosphatidylinositol transfer family protein
Glyma.11G023700	72	0.00186734	PF01388,PF02928,PF02375,PF00628,PF08429,PF02373	transcription factor jumonji (jmjC) domain-containing protein
Glyma.06G018400	72	0.00256273	PF08142,PF04950
Glyma.06G189500	72	0.0026727	PF01535,PF13041	Pentatricopeptide repeat (PPR) superfamily protein
Glyma.09G208500	71.5	0.00491694	PF00170,PF07777,PF16596	basic region/leucine zipper transcription factor 16
Glyma.12G159600	71.3333	0.000284354	PF14259,PF00076	RNA-binding (RRM/RBD/RNP motifs) family protein
Glyma.08G352600	71	0.00119909	PF13921,PF07529	Helicase/SANT-associated, DNA binding protein
Glyma.08G162800	71	0.00139813	PF13893,PF00642	Zinc finger C-x8-C-x5-C-x3-H type family protein
Glyma.06G065700	71	0.00722875
Glyma.08G276900	71	0.00800018	PF00588	tRNA/rRNA methyltransferase (SpoU) family protein
Glyma.08G040500	71	0.0318185	PF03456,PF00400,PF02141	stomatal cytokinesis defective / SCD1 protein (SCD1)
Glyma.02G084700	71	0.0359464
Glyma.20G183000	70.5	0.00429473	PF00849,PF01479	pseudouridine synthase family protein
Glyma.03G169500	70.5	0.0376176	PF02736,PF00612,PF01843,PF00063	myosin XI B
Glyma.15G025800	70.25	0.000193797	PF12710,PF16209,PF16212	ATPase E1-E2 type family protein / haloacid dehalogenase-like hydrolase family protein
Glyma.12G007900	70	0.00274025		PHD finger family protein
Glyma.13G184500	70	0.00280681	PF00249,PF00439	bromodomain 4
Glyma.15G259800	70	0.00727931
Glyma.18G002400	70	0.0114426	PF04423,PF13175	DNA repair-recombination protein (RAD50)
Glyma.17G256100	70	0.011691	PF00330	isopropyl malate isomerase large subunit 1
Glyma.01G228900	70	0.0234964	PF03810,PF08389,PF08767	exportin 1A
Glyma.11G110000	70	0.039524	PF08338,PF01370	NAD(P)-binding Rossmann-fold superfamily protein
Glyma.05G209900	69.65	0.000390239	PF04749	PLAC8 family protein
Glyma.03G088400	69.5833	0.0194212	PF13414,PF04564	carboxyl terminus of HSC70-interacting protein
Glyma.03G218300	69.5	0.000960009	PF01556,PF00226	DNAJ heat shock family protein
Glyma.16G112800	69.4	0.00290136	PF05327	RNA polymerase I specific transcription initiation factor RRN3 protein
Glyma.05G115200	69.2	9.28599e-05	PF01535,PF13041	Pentatricopeptide repeat (PPR) superfamily protein
Glyma.11G012200	69	0.00339382	PF00271,PF00270	P-loop containing nucleoside triphosphate hydrolases superfamily protein
Glyma.04G157200	69	0.0192817	PF00027,PF00520	cyclic nucleotide-gated channel 17
Glyma.13G149200	69	0.0261939	PF00069	ser/arg-rich protein kinase 4
Glyma.14G190000	68.5	0.0021117	PF00514	ARM repeat superfamily protein
Glyma.04G098500	68.5	0.00382573
Glyma.12G167800	68.25	0.000131551	PF00400,PF08145	Transducin/WD40 repeat-like superfamily protein
Glyma.20G215200	68.1667	0.00110972
Glyma.12G004200	68	0.00259852	PF00406	P-loop containing nucleoside triphosphate hydrolases superfamily protein
Glyma.11G038500	68	0.00259852	PF02732	Restriction endonuclease, type II-like superfamily protein
Glyma.01G202300	68	0.0125734	PF01926,PF01018	GTP-binding protein Obg/CgtA
Glyma.09G114700	68	0.0186732	PF09763	exocyst complex component sec3A
Glyma.13G161600	68	0.0292967	PF00862,PF05116,PF00534	sucrose phosphate synthase 1F
Glyma.17G261600	68	0.0377833	PF00240	Ubiquitin-like superfamily protein
Glyma.14G002700	68	0.0425724	PF12906	RING/U-box superfamily protein
Glyma.07G163000	67.875	0.000346312
Glyma.01G060700	67.8235	0.000428014	PF00271,PF04408,PF07717	RNA helicase family protein
Glyma.U001700	67.5	0.00183384	PF00005,PF12698	ABC2 homolog 7
Glyma.14G207200	67.25	0.028003	PF00005,PF00664	ABC transporter of the mitochondrion 3
Glyma.12G143400	67	0.00124751		UDP-glucuronic acid decarboxylase 1
Glyma.12G211000	67	0.00187499	PF14381,PF07714	Mitogen activated protein kinase kinase kinase-related
Glyma.08G360000	67	0.00350797
Glyma.08G196200	67	0.00365423	PF02812,PF00208	Amino acid dehydrogenase family protein
Glyma.02G045400	67	0.00400348	PF05383	winged-helix DNA-binding transcription factor family protein
Glyma.18G068400	67	0.00727299
Glyma.02G212500	67	0.0177619	PF00226	Chaperone DnaJ-domain superfamily protein
Glyma.04G022000	67	0.0243444
Glyma.04G236700	66.6667	0.00352987
Glyma.15G067900	66.5	0.000813921	PF07496,PF02362	HSI2-like 1
Glyma.10G292400	66.5	0.00137519
Glyma.10G187400	66.375	0.000234121	PF00892	nodulin MtN21 /EamA-like transporter family protein
Glyma.05G061500	66.3333	0.0101443	PF13696,PF08783	DWNN domain, a CCHC-type zinc finger
Glyma.14G075500	66.3333	0.031977	PF07983,PF00332	O-Glycosyl hydrolases family 17 protein
Glyma.08G014800	66.25	0.00054163	PF00307,PF00225	P-loop nucleoside triphosphate hydrolases superfamily protein with CH (Calponin Homology) domain
Glyma.16G104600	66.25	0.00698914	PF00069	Protein kinase superfamily protein
Glyma.08G156800	66.0833	0.0002312	PF04652,PF14288,PF02364	callose synthase 5
Glyma.03G139300	66.0545	0.0011284	PF07974,PF03016	exostosin family protein
Glyma.10G049300	66	0.00255659	PF00855	Tudor/PWWP/MBT superfamily protein
Glyma.12G180600	66	0.00379517	PF02883,PF02296,PF01602	Adaptor protein complex AP-2, alpha subunit
Glyma.16G152500	66	0.0108543	PF04153,PF04065	transcription regulator NOT2/NOT3/NOT5 family protein
Glyma.10G294700	65.5	0.00233807	PF00566	Ypt/Rab-GAP domain of gyp1p superfamily protein
Glyma.06G070700	65.5	0.0190969	PF00025	RAN GTPase 3
Glyma.09G002400	65.3333	0.00111078	PF00069	Protein kinase family protein with ARM repeat domain
Glyma.03G166400	65	0.00220632	PF00249,PF14379	phosphate starvation response 1
Glyma.03G027900	65	0.0025296	PF00814	glycoprotease 1
Glyma.09G059900	65	0.00266892	PF00013	RNA-binding KH domain-containing protein
Glyma.07G249700	65	0.00327359	PF00571,PF16561	homolog of yeast sucrose nonfermenting 4
Glyma.14G081100	65	0.0042881	PF07819	alpha/beta-Hydrolases superfamily protein
Glyma.08G114900	65	0.0042881	PF02985,PF13646	ARM repeat superfamily protein
Glyma.11G038000	64.8	0.000178425	PF00856,PF05033,PF02182	SU(VAR)3-9 homolog 6
Glyma.18G210100	64.6667	0.000250381	PF03127,PF00790	ENTH/VHS/GAT family protein
Glyma.10G210000	64.6429	0.000248129	PF17047,PF00168	Calcium-dependent lipid-binding (CaLB domain) family protein
Glyma.06G227500	64.6	0.000645463	PF04859	Plant protein of unknown function (DUF641)
Glyma.08G361500	64.6	0.00494257	PF04652,PF14288,PF02364	glucan synthase-like 12
Glyma.02G214700	64	0.00517765	PF00175,PF00258,PF00667	P450 reductase 1
Glyma.11G076100	64	0.00912184	PF05911	Plant protein of unknown function (DUF869)
Glyma.12G166500	64	0.0117294	PF01823	MAC/Perforin domain-containing protein
Glyma.13G080800	64	0.0252816
Glyma.13G326200	64	0.0340137	PF13899,PF13848,PF00085	PDI-like 1-4
Glyma.13G147300	63.8125	0.000337892	PF10358
Glyma.02G206000	63.75	0.000288435	PF04484	Family of unknown function (DUF566)
Glyma.08G153900	63.3333	0.000791873
Glyma.03G052200	63.1053	0.00424502	PF01161	PEBP (phosphatidylethanolamine-binding protein) family protein
Glyma.03G211200	63	0.000257106	PF07496	CW-type Zinc Finger
Glyma.18G016000	63	0.00372186	PF07539	ARM repeat superfamily protein
Glyma.08G148900	63	0.00730719	PF15306	proline-rich family protein
Glyma.08G093800	63	0.0168785	PF13532	hydroxyproline-rich glycoprotein family protein
Glyma.16G091200	63	0.0242569	PF03798	LAG1 longevity assurance homolog 3
Glyma.20G191400	62.9375	0.00183792	PF13920	RING/U-box superfamily protein
Glyma.02G216000	62.6667	0.000448531	PF00627,PF14377,PF06012,PF06025,PF00632	ubiquitin-protein ligase 1
Glyma.06G293200	62.5714	0.000934264
Glyma.17G170300	62.5	0.00141082	PF00847	Integrase-type DNA-binding superfamily protein
Glyma.18G107900	62.5	0.00179893	PF04652,PF14288,PF02364	glucan synthase-like 7
Glyma.11G246000	62.5	0.00688583
Glyma.14G223000	62.3	0.0014004	PF07731,PF07732,PF00394	SKU5 similar 5
Glyma.11G085500	62.1667	0.00374174	PF02042	RWP-RK domain-containing protein
Glyma.01G155300	62.1667	0.0109159	PF09379,PF00373,PF00784,PF00225	kinesin-like calmodulin-binding protein (ZWICHEL)
Glyma.03G004900	62	0.00191676	PF04818	ENTH/VHS family protein
Glyma.04G043300	62	0.0034811	PF08513,PF00400	WD-40 repeat family protein
Glyma.13G259200	62	0.0034811		interactor of constitutive active rops 1
Glyma.12G114000	62	0.0034811	PF00069	Protein kinase superfamily protein
Glyma.08G288900	62	0.00451113		NHL domain-containing protein
Glyma.13G178100	62	0.00543904	PF02847	MIF4G domain-containing protein / MA3 domain-containing protein
Glyma.15G072000	62	0.00646686	PF03031,PF00035	C-terminal domain phosphatase-like 1
Glyma.13G371000	62	0.012708	PF02458	hydroxycinnamoyl-CoA shikimate/quinate hydroxycinnamoyl transferase
Glyma.09G077900	62	0.0421774	PF00400	Transducin/WD40 repeat-like superfamily protein
Glyma.01G112200	61.8571	0.000351613	PF13676,PF00931	Disease resistance protein (TIR-NBS-LRR class) family
Glyma.12G053300	61.6667	0.000404688
Glyma.09G097600	61.5	0.00717058	PF05182	homolog of yeast FIP1 [V]
Glyma.01G164500	61.3333	0.000916905	PF04783,PF04782	Protein of unknown function (DUF630) ;Protein of unknown function (DUF632)
Glyma.19G125600	61	0.000331996	PF14641,PF14632,PF14639,PF14635,PF14878,PF14633	global transcription factor group B1
Glyma.15G166600	61	0.00259184	PF00013	RNA-binding KH domain-containing protein
Glyma.10G038400	61	0.00295461	PF00433,PF07714	AGC (cAMP-dependent, cGMP-dependent and protein kinase C) kinase family protein
Glyma.09G099400	61	0.00295461	PF02892,PF05699,PF14372	BED zinc finger ;hAT family dimerisation domain
Glyma.05G095400	61	0.00495949	PF00210	ferritin 2
Glyma.02G155000	61	0.00658314	PF05496	AAA-type ATPase family protein
Glyma.02G271500	61	0.00777054	PF00917,PF13423,PF14533,PF12436	ubiquitin-specific protease 12
Glyma.07G188700	61	0.0183122	PF01535,PF13041	Pentatricopeptide repeat (PPR) superfamily protein
Glyma.05G145400	61	0.0183122
Glyma.17G215700	61	0.0308788	PF08626	TRS120
Glyma.18G256400	60.7934	0.00132596	PF07847	Protein of unknown function (DUF1637)
Glyma.U027900	60.7	0.000351978	PF14360	Arabidopsis Inositol phosphorylceramide synthase 1
Glyma.18G263200	60.6667	0.00150048	PF00664,PF00005	multidrug resistance-associated protein 3
Glyma.19G111200	60.5	0.0115008	PF00352	TATA binding protein 2
Glyma.04G066600	60.1111	0.000629443
Glyma.02G222900	60	0.00284194	PF06972	GBF-interacting protein 1
Glyma.02G276000	60	0.0036943	PF00069	cyclin-dependent kinase C;1
Glyma.04G066400	60	0.00803561	PF01417,PF07651	epsin N-terminal homology (ENTH) domain-containing protein / clathrin assembly protein-related
Glyma.08G166200	59.7727	0.00128438	PF14541	Eukaryotic aspartyl protease family protein
Glyma.18G241300	59.5	0.00151421	PF00642	zinc finger protein 1
Glyma.07G250700	59.5	0.00545545	PF13892,PF09110,PF04851,PF00271,PF09111	chromatin remodeling factor17
Glyma.13G068200	59.5	0.00657673	PF07690	Major facilitator superfamily protein
Glyma.12G110600	59.5	0.0105003	PF07690	Major facilitator superfamily protein
Glyma.15G196400	59.5	0.0248821	PF03031	SCP1-like small phosphatase 4
Glyma.13G112600	59.25	0.000161661	PF02309,PF02362,PF06507	Transcriptional factor B3 family protein / auxin-responsive factor AUX/IAA-related
Glyma.17G044000	59	0.00178164	PF16206,PF16213,PF09324,PF12783,PF01369	HOPM interactor 7
Glyma.16G173700	59	0.00189335	PF05496	P-loop containing nucleoside triphosphate hydrolases superfamily protein
Glyma.01G032100	59	0.00293868	PF02883,PF01602	Adaptor protein complex AP-1, gamma subunit
Glyma.18G234700	59	0.00311821	PF04851,PF08880,PF00271	transcription regulatory protein SNF2, putative
Glyma.06G133400	59	0.00356927	PF00566	Ypt/Rab-GAP domain of gyp1p superfamily protein
Glyma.04G131700	59	0.00419505	PF01926,PF02212,PF01031	dynamin-related protein 3A
Glyma.10G268700	59	0.00652264		2-oxoglutarate (2OG) and Fe(II)-dependent oxygenase superfamily protein
Glyma.09G279400	59	0.0066513	PF14938	alpha-soluble NSF attachment protein 2
Glyma.11G079200	59	0.0127591	PF03635	VPS35 homolog A
Glyma.20G217500	59	0.0199252	PF06552	Tetratricopeptide repeat (TPR)-like superfamily protein
Glyma.04G233700	59	0.0286492	PF03810,PF13513	ARM repeat superfamily protein
Glyma.12G143500	59	0.0448307
Glyma.01G022400	58.875	0.00533904	PF00069	Protein kinase superfamily protein
Glyma.18G146600	58.7692	0.00281425	PF00225	kinesin like protein for actin based chloroplast movement 1
Glyma.08G031700	58.75	0.000527614	PF00365	phosphofructokinase 3
Glyma.17G024600	58.75	0.00184613	PF00249,PF06584	DNA binding
Glyma.06G008500	58.75	0.00303491	PF14392,PF00098	zinc knuckle (CCHC-type) family protein
Glyma.10G051800	58.6901	0.00924572	PF12906	RING/U-box superfamily protein
Glyma.01G074400	58.6667	0.00259348
Glyma.20G127600	58.5	0.0141559		sodium:hydrogen antiporter 1
Glyma.02G073400	58.3333	0.0002817
Glyma.01G054100	58.1667	0.00534501		Transducin/WD40 repeat-like superfamily protein
Glyma.07G226700	58.15	0.000326664	PF03763	Remorin family protein
Glyma.17G249900	58	0.00244902	PF02213	GYF domain-containing protein
Glyma.16G025200	58	0.00337994	PF00534,PF15924	UDP-Glycosyltransferase superfamily protein
Glyma.19G208700	58	0.00393078	PF00046	Homeodomain-like superfamily protein
Glyma.14G126200	58	0.00489452	PF04862	Protein of unknown function, DUF642
Glyma.09G206800	58	0.0210824	PF05739,PF14523	Syntaxin/t-SNARE family protein
Glyma.04G074200	58	0.0229322	PF05185	SHK1 binding protein 1
Glyma.02G012100	58	0.0229322	PF00856	SET domain-containing protein
Glyma.14G159400	57.8333	0.000916654	PF10497,PF02373	Transcription factor jumonji (jmjC) domain-containing protein
Glyma.15G020900	57.5455	0.000230517	PF00365	phosphofructokinase 3
Glyma.14G222100	57.5	0.00198274	PF01466,PF03931	S phase kinase-associated protein 1
Glyma.17G213600	57.5	0.00255537	PF13833,PF00036	calcium-binding EF hand family protein
Glyma.08G293700	57.5	0.00991721
Glyma.02G101800	57.25	0.00125548		nuclear matrix constituent protein-related
Glyma.11G256200	57.25	0.00364424	PF00271,PF00270	P-loop containing nucleoside triphosphate hydrolases superfamily protein
Glyma.16G137800	57.0351	0.00445402		Chaperone DnaJ-domain superfamily protein
Glyma.18G274100	57	0.000123465	PF14817
Glyma.14G223100	57	0.0022202	PF00240	Ubiquitin-like superfamily protein
Glyma.01G225700	57	0.00329824	PF02207	PHD finger protein-related
Glyma.09G117300	57	0.00372977	PF08659	NAD(P)-binding Rossmann-fold superfamily protein
Glyma.20G079100	57	0.00669253	PF12998	RING/FYVE/PHD zinc finger superfamily protein
Glyma.07G198200	57	0.00859048	PF10374,PF10373	Telomerase activating protein Est1
Glyma.20G099600	57	0.017626	PF00133	methionyl-tRNA synthetase / methionine--tRNA ligase / MetRS (cpMetRS)
Glyma.07G099800	57	0.017626	PF00892	nodulin MtN21 /EamA-like transporter family protein
Glyma.11G175400	57	0.0426079	PF01713,PF08590	smr (Small MutS Related) domain-containing protein
Glyma.05G193400	57	0.0452802
Glyma.15G261000	56.7826	0.000764782
Glyma.15G163800	56.6	0.000417667	PF06862
Glyma.04G100100	56.5	0.0307658		F-BOX WITH WD-40 2
Glyma.08G161000	56.1	0.000605059	PF07722,PF06418	CTP synthase family protein
Glyma.10G102800	56	0.00126309	PF03485	Arginyl-tRNA synthetase, class Ic
Glyma.05G133100	56	0.00127997	PF00627,PF14377,PF06012,PF00632,PF06025	ubiquitin-protein ligase 1
Glyma.10G274000	56	0.00177971
Glyma.12G144100	56	0.0028344	PF00954,PF08276,PF01453,PF07714	S-locus lectin protein kinase family protein
Glyma.07G037400	56	0.00377418	PF13087,PF13086	P-loop containing nucleoside triphosphate hydrolases superfamily protein
Glyma.15G000200	56	0.00419423
Glyma.04G064900	56	0.00699931	PF00515,PF00564,PF13414	Octicosapeptide/Phox/Bem1p (PB1) domain-containing protein / tetratricopeptide repeat (TPR)-containing protein
Glyma.12G081900	56	0.0205366	PF01066	aminoalcoholphosphotransferase 1
Glyma.01G084800	55.9032	0.000213234	PF01490	Transmembrane amino acid transporter family protein
Glyma.09G199600	55.8824	0.000984355	PF00860	Xanthine/uracil permease family protein
Glyma.17G015200	55.6667	0.00842583	PF00514,PF13855,PF01734	phospholipases;galactolipases
Glyma.16G221700	55.6	0.000126571	PF08147,PF00271,PF00270	hydrolases, acting on acid anhydrides, in phosphorus-containing anhydrides;ATP-dependent helicases;nucleic acid binding;ATP binding;RNA binding;helicases
Glyma.09G188700	55.557	0.00132788	PF01740,PF00916	sulfate transporter 3;1
Glyma.12G083300	55.5	0.00175574	PF00637	vacuolar protein sorting 41
Glyma.08G302400	55.5	0.0034381	PF02847	MIF4G domain-containing protein / MA3 domain-containing protein
Glyma.12G075800	55.5	0.00784125	PF00046,PF01852,PF08670	Homeobox-leucine zipper family protein / lipid-binding START domain-containing protein
Glyma.13G214900	55	0.000848781	PF00646,PF01167	tubby like protein 3
Glyma.18G094500	55	0.00397303		zinc finger (C2H2 type) family protein
Glyma.14G213000	55	0.00631454		CCCH-type zinc finger family protein
Glyma.13G288600	55	0.0193007	PF00085,PF13850,PF07970	PDI-like 5-4
Glyma.19G170700	55	0.0402261	PF02736,PF00612,PF01843,PF00063	myosin 2
Glyma.08G074400	54.9	0.00032465	PF00646,PF01344	Galactose oxidase/kelch repeat superfamily protein
Glyma.19G170800	54.8571	0.00826243	PF13738	Flavin-binding monooxygenase family protein
Glyma.20G055400	54.75	0.000178302
Glyma.09G158300	54.7	0.000948104	PF02213,PF02201,PF03126	SWIB/MDM2 domain;Plus-3;GYF
Glyma.05G244700	54.625	0.000162048	PF00025	RAB GTPase homolog A6A
Glyma.08G264800	54.5128	9.26383e-05	PF07722,PF06418	CTP synthase family protein
Glyma.09G088300	54.5	0.00438111	PF03031	SCP1-like small phosphatase 4
Glyma.17G259200	54.5	0.0456191	PF03635	VPS35 homolog B
Glyma.11G182900	54.3333	0.00286636	PF00076	RNA-binding (RRM/RBD/RNP motifs) family protein
Glyma.08G156400	54.25	0.00037269	PF00454	phosphatidylinositol 4-OH kinase beta1
Glyma.14G150900	54.125	0.00585962	PF05911	Plant protein of unknown function (DUF869)
Glyma.10G038600	54	0.00196648	PF00069	casein kinase I-like 6
Glyma.06G139100	54	0.00203074		double-stranded DNA binding
Glyma.04G155400	54	0.00381548	PF04576	Protein of unknown function, DUF593
Glyma.16G008300	54	0.0044891	PF13920,PF12483	E3 Ubiquitin ligase family protein
Glyma.08G313100	54	0.00630722	PF00271,PF00270	DEA(D/H)-box RNA helicase family protein
Glyma.08G152400	54	0.0124914	PF05303,PF15044,PF13424,PF12807,PF13236	tetratricopeptide repeat (TPR)-containing protein
Glyma.05G122500	54	0.0183357	PF13087,PF13086	P-loop containing nucleoside triphosphate hydrolases superfamily protein
Glyma.17G219600	53.8824	0.000186877	PF01713,PF08590	CTC-interacting domain 7
Glyma.20G031300	53.8333	0.0126549	PF12796,PF07714	VH1-interacting kinase
Glyma.19G065400	53.75	0.00170488	PF00855	Tudor/PWWP/MBT superfamily protein
Glyma.15G253800	53.5	0.00180638	PF00271,PF00270,PF02889	U5 small nuclear ribonucleoprotein helicase, putative
Glyma.01G181100	53.3333	0.0070541	PF03000	Phototropic-responsive NPH3 family protein
Glyma.13G158400	53.2857	0.000315793		Transducin family protein / WD-40 repeat family protein
Glyma.13G348200	53.25	0.00261017	PF12710,PF16209,PF16212	ATPase E1-E2 type family protein / haloacid dehalogenase-like hydrolase family protein
Glyma.04G187900	53	0.00020571	PF02893,PF00168,PF16016	C2 calcium/lipid-binding and GRAM domain containing protein
Glyma.17G211100	53	0.00252907	PF06886	TPX2 (targeting protein for Xklp2) protein family
Glyma.13G108100	53	0.00371776	PF02450	phospholipid:diacylglycerol acyltransferase
Glyma.17G075600	53	0.00424474
Glyma.18G286600	53	0.00436924	PF00005,PF00664	P-glycoprotein 20
Glyma.12G020200	53	0.00935983	PF00622	TRAUCO
Glyma.06G093000	53	0.0167579	PF13812,PF13041	Pentatricopeptide repeat (PPR) superfamily protein
Glyma.14G171600	53	0.0167579	PF13850,PF07970	Endoplasmic reticulum vesicle transporter protein
Glyma.14G192900	53	0.0167579	PF00642,PF00076	RNA recognition motif (RRM)-containing protein
Glyma.15G069400	53	0.0238721	PF00400,PF13925	Transducin/WD40 repeat-like superfamily protein
Glyma.15G047600	52.7273	7.07819e-05
Glyma.07G036600	52.6667	0.000355086	PF06972	Kinase-related protein of unknown function (DUF1296)
Glyma.16G082400	52.6667	0.00039397	PF00626,PF04810,PF04815,PF08033,PF04811	Sec23/Sec24 protein transport family protein
Glyma.11G031400	52.5	0.00176135	PF15413,PF01237	OSBP(oxysterol binding protein)-related protein 2A
Glyma.18G067600	52.5	0.0185552	PF04859	Plant protein of unknown function (DUF641)
Glyma.20G055800	52	0.00045318	PF00254	FKBP-like peptidyl-prolyl cis-trans isomerase family protein
Glyma.04G074300	52	0.00407104	PF13423	ubiquitin-specific protease 26
Glyma.04G155600	52	0.00608962	PF00940	DNA/RNA polymerases superfamily protein
Glyma.12G135700	52	0.00691613	PF12624
Glyma.05G111100	52	0.0198626	PF00076,PF14111
Glyma.08G223700	52	0.0302891	PF14531	Protein kinase superfamily protein
Glyma.15G211400	52	0.0363263	PF00154	recA DNA recombination family protein
Glyma.01G046500	51.9231	0.00962101	PF04116	sphingoid base hydroxylase 2
Glyma.04G061700	51.6667	0.000424401
Glyma.08G016600	51.6	0.000353508	PF04749	PLAC8 family protein
Glyma.07G027800	51.5	0.00200412	PF16987
Glyma.01G094200	51.3333	0.00122855	PF02847,PF02854	eukaryotic translation initiation factor 4G
Glyma.02G124500	51.3333	0.00513382	PF02518,PF00183	Chaperone protein htpG family protein
Glyma.14G184500	51.3333	0.00941015	PF00464	serine hydroxymethyltransferase 2
Glyma.03G113500	51.25	0.00744427	PF01239	Protein prenylyltransferase superfamily protein
Glyma.17G080100	51.1667	0.00255761	PF13418,PF13415	Galactose oxidase/kelch repeat superfamily protein
Glyma.08G081300	51	0.00454973	PF02585	N-acetylglucosaminylphosphatidylinositol de-N-acetylase family protein
Glyma.12G073200	51	0.00736825	PF00076,PF14570	RNA binding (RRM/RBD/RNP motifs) family protein
Glyma.08G319000	51	0.0103295		zinc finger (C2H2 type) family protein
Glyma.08G016200	51	0.0103295	PF01388	ARID/BRIGHT DNA-binding domain;ELM2 domain protein
Glyma.11G060300	51	0.0141322	PF00503	extra-large G-protein 1
Glyma.12G095300	51	0.0415815	PF07646,PF13418,PF00149	BRI1 suppressor 1 (BSU1)-like 2
Glyma.08G126900	50.6667	0.00451333	PF02990	transmembrane nine 1
Glyma.15G245600	50.5	0.015856	PF00168	Calcium-dependent lipid-binding (CaLB domain) family protein
Glyma.13G135900	50.5	0.0229436	PF06203,PF00072	pseudo-response regulator 7
Glyma.17G128200	50.2222	0.0109473	PF00069	Protein kinase superfamily protein
Glyma.18G174200	50.0588	0.00183423	PF00564,PF07714	Protein kinase superfamily protein with octicosapeptide/Phox/Bem1p domain
Glyma.05G136000	50	0.00018699	PF08265,PF05764	sequence-specific DNA binding transcription factors;DNA binding;DNA binding
Glyma.02G024200	50	0.00392107	PF04601	Actin cross-linking protein
Glyma.13G064500	50	0.00519604	PF00400	TBP-associated factor 5
Glyma.12G013800	50	0.00519604	PF00561	esterase/lipase/thioesterase family protein
Glyma.16G181000	50	0.00914052	PF14531	Protein kinase superfamily protein
Glyma.11G033600	50	0.0130824	PF05641	G2484-1 protein
Glyma.04G211300	50	0.0197399	PF03141	S-adenosyl-L-methionine-dependent methyltransferases superfamily protein
Glyma.05G195300	50	0.0197399	PF00069	cyclin-dependent kinase E;1
Glyma.19G007300	50	0.0219562	PF14531	Protein kinase superfamily protein
Glyma.07G250000	50	0.0274216	PF00642	Zinc finger C-x8-C-x5-C-x3-H type family protein
Glyma.03G142700	50	0.0334887	PF07986	Tubulin binding cofactor C domain-containing protein
Glyma.07G175000	49.8571	0.00256111	PF07722	anthranilate synthase beta subunit 1
Glyma.10G218400	49.5	0.000139158	PF00118,PF01504	FORMS APLOID AND BINUCLEATE CELLS 1A
Glyma.12G173000	49.5	0.00708017	PF00295	Pectin lyase-like superfamily protein
Glyma.18G208100	49.4615	0.000853358	PF00481	Protein phosphatase 2C family protein
Glyma.14G106500	49.3636	0.00503328	PF01713,PF08590	CTC-interacting domain 7
Glyma.18G077700	49.3158	0.000460474	PF08766	DEK domain-containing chromatin associated protein
Glyma.20G025400	49.25	0.00125653	PF13537,PF00733	Asparagine synthase family protein
Glyma.14G035100	49.2439	0.000842477
Glyma.15G199800	49.0769	0.00742565
Glyma.17G257100	49	0.00157251	PF00098,PF03159	5'-3' exoribonuclease 3
Glyma.06G255000	49	0.00259	PF13423,PF02148,PF00627	ubiquitin-specific protease 14
Glyma.15G253100	49	0.00394523	PF07967	IAP-like protein 1
Glyma.13G273300	49	0.004103	PF13771,PF00004	P-loop containing nucleoside triphosphate hydrolases superfamily protein
Glyma.18G120100	49	0.00808181	PF04765	Protein of unknown function (DUF616)
Glyma.11G241400	49	0.00982747	PF01189	S-adenosyl-L-methionine-dependent methyltransferases superfamily protein
Glyma.04G194900	49	0.0128868	PF05496,PF00498	AAA-type ATPase family protein
Glyma.15G099400	49	0.0319938	PF03110	squamosa promoter binding protein-like 7
Glyma.02G258200	49	0.0387095	PF09268,PF13838,PF01394,PF00637	Clathrin, heavy chain
Glyma.10G127200	49	0.0419841
Glyma.13G067800	48.8125	0.000251335	PF08295,PF02671,PF16879	SIN3-like 2
Glyma.14G024000	48.75	0.000362862
Glyma.17G022300	48.75	0.000632396	PF04851,PF00271,PF14619	P-loop containing nucleoside triphosphate hydrolases superfamily protein
Glyma.05G094000	48.7143	0.00443893	PF04095	nicotinate phosphoribosyltransferase 2
Glyma.06G052000	48.6667	0.00292652	PF02535	iron regulated transporter 3
Glyma.05G090500	48.6667	0.00402725		Transducin/WD40 repeat-like superfamily protein
Glyma.14G112400	48.6	3.12098e-05	PF03789,PF03790,PF05920,PF03791	KNOTTED1-like homeobox gene 3
Glyma.09G278600	48.5	0.000448036	PF03127,PF00790	ENTH/VHS/GAT family protein
Glyma.06G075000	48.5	0.00114506		DDB1-CUL4 associated factor 1
Glyma.04G073900	48.5	0.00278927		DDB1-CUL4 associated factor 1
Glyma.11G230200	48.5	0.0130638	PF01422	sequence-specific DNA binding transcription factors;zinc ion binding;sequence-specific DNA binding transcription factors
Glyma.10G108000	48.5	0.0200213	PF00069	Protein kinase superfamily protein
Glyma.09G128100	48.5	0.0226304		Nucleolar GTP-binding protein
Glyma.19G243700	48.4	0.000247315	PF13178,PF00612	IQ-domain 19
Glyma.08G354500	48.3333	0.00139845	PF08513,PF00400	LEUNIG_homolog
Glyma.10G062700	48.3333	0.00489689	PF16135	Acyl-CoA N-acyltransferase with RING/FYVE/PHD-type zinc finger domain
Glyma.02G144200	48.2	0.00103322	PF00400,PF14844,PF02138	Beige/BEACH domain ;WD domain, G-beta repeat protein
Glyma.15G128700	48.0769	0.00090052	PF00141	Peroxidase superfamily protein
Glyma.11G224200	48.0575	0.00141463	PF00854	Major facilitator superfamily protein
Glyma.15G121000	48	0.00468015	PF00582	Adenine nucleotide alpha hydrolases-like superfamily protein
Glyma.19G224000	48	0.00468015	PF01926,PF11987	Translation initiation factor 2, small GTP-binding protein
Glyma.13G097600	48	0.00733862	PF12937,PF13426,PF07646,PF13415,PF13418	Galactose oxidase/kelch repeat superfamily protein
Glyma.13G346000	48	0.00733862	PF12579	Protein of unknown function (DUF3755)
Glyma.17G117600	48	0.00733862		RNA polymerase II transcription mediators
Glyma.09G256600	48	0.0100948	PF01535,PF13041	Pentatricopeptide repeat (PPR) superfamily protein
Glyma.13G174200	48	0.0100948	PF02841,PF02263	Guanylate-binding family protein
Glyma.05G008500	47.75	0.000437712
Glyma.09G268900	47.3333	0.00175747	PF03479	AT-hook motif nuclear-localized protein 1
Glyma.19G008100	47.3333	0.0226376	PF00657	GDSL-like Lipase/Acylhydrolase superfamily protein
Glyma.04G109500	47.25	0.00664686	PF00931	transmembrane receptors;ATP binding
Glyma.U031300	47	0.00236958	PF04836,PF05004	interferon-related developmental regulator family protein / IFRD protein family
Glyma.09G180300	47	0.00338333	PF13639	RING/U-box superfamily protein
Glyma.08G134400	47	0.0042205	PF00684,PF01556,PF00226	DNAJ heat shock family protein
Glyma.05G189400	47	0.0042205	PF14938,PF13424	tetratricopeptide repeat (TPR)-containing protein
Glyma.19G217200	47	0.00893734	PF04438,PF04795	HIT zinc finger ;PAPA-1-like conserved region
Glyma.08G153800	47	0.0288453	PF13639,PF00642	zinc finger (CCCH-type/C3HC4-type RING finger) family protein
Glyma.14G032500	46.6667	0.00321384		maternal effect embryo arrest 22
Glyma.16G182200	46.6	0.00117738
Glyma.04G064100	46.5	0.000458655	PF03789,PF03790,PF05920,PF03791	KNOTTED1-like homeobox gene 3
Glyma.02G280500	46.5	0.0065638	PF13167,PF01926,PF16360	GTP-binding protein, HflX
Glyma.17G150300	46.5	0.00658525	PF01467	nicotinate/nicotinamide mononucleotide adenyltransferase
Glyma.17G125100	46.5	0.0122925	PF02445	quinolinate synthase
Glyma.11G005500	46.3333	0.00132995	PF00628,PF16135	Acyl-CoA N-acyltransferase with RING/FYVE/PHD-type zinc finger protein
Glyma.06G018700	46.3333	0.00432346
Glyma.08G303400	46.2	0.00137808
Glyma.15G027900	46	0.00263835	PF00564,PF02042	Plant regulator RWP-RK family protein
Glyma.05G185000	46	0.00432925	PF13725,PF08351,PF05127,PF13718	Domain of unknown function (DUF1726) ;Putative ATPase (DUF699)
Glyma.18G296100	46	0.00449817	PF00076	RNA-binding (RRM/RBD/RNP motifs) family protein
Glyma.15G224400	46	0.00449817	PF05033,PF00856,PF02182	SU(VAR)3-9 homolog 3
Glyma.06G148300	46	0.00449817	PF01399	26S proteasome regulatory subunit, putative (RPN5)
Glyma.19G218500	46	0.00504587	PF00249,PF05499	myb-like transcription factor family protein
Glyma.16G114800	46	0.00811506	PF00011,PF01388	ARID/BRIGHT DNA-binding domain-containing protein
Glyma.15G269200	46	0.0112676	PF15306	proline-rich family protein
Glyma.04G010800	46	0.0158537	PF00186,PF00303	thymidylate synthase 1
Glyma.07G210600	46	0.0211588	PF00069	CDPK-related kinase
Glyma.02G250700	46	0.0355987	PF13540,PF00415	Regulator of chromosome condensation (RCC1) family protein
Glyma.01G097200	46	0.0414935	PF08243	SPT2 chromatin protein
Glyma.05G241800	46	0.0414935		zinc finger (C2H2 type) family protein
Glyma.02G228000	45.8333	0.0189069	PF14416,PF13839	Plant protein of unknown function (DUF828)
Glyma.05G089200	45.75	0.000239943	PF13906,PF13520	cationic amino acid transporter 2
Glyma.09G199900	45.6667	0.00083659	PF00069	Protein kinase superfamily protein
Glyma.04G091700	45.6667	0.00106231	PF01753,PF13423	ubiquitin-specific protease 16
Glyma.09G084300	45.6667	0.00240406		Outer arm dynein light chain 1 protein
Glyma.15G201400	45.5	0.00250616	PF07690	Major facilitator superfamily protein
Glyma.05G064100	45.5	0.00313118	PF00036	calcium-dependent protein kinase 29
Glyma.05G137400	45.5	0.0153642	PF02535	ZIP metal ion transporter family
Glyma.07G080900	45.5	0.0483481	PF01486,PF00319	AGAMOUS-like 20
Glyma.02G085500	45.3333	0.00151722	PF07058	microtubule-associated proteins 70-2
Glyma.08G114800	45	0.00342798	PF01195	Peptidyl-tRNA hydrolase family protein
Glyma.17G112700	45	0.00489975	PF00005	general control non-repressible 4
Glyma.04G122100	45	0.00573122	PF00861	Ribosomal L18p/L5e family protein
Glyma.15G222100	45	0.00630262	PF03101	FAR1-related sequence 3
Glyma.08G139600	45	0.00732307	PF04818	ENTH/VHS family protein
Glyma.03G056300	45	0.00732307	PF00462	CAX-interacting protein 2
Glyma.06G179400	45	0.00808071	PF17098	FKBP12 interacting protein 37
Glyma.20G143600	45	0.00808071	PF08263,PF12819	Leucine-rich repeat (LRR) family protein
Glyma.08G149300	45	0.0100533	PF12708	glycoside hydrolase family 28 protein / polygalacturonase (pectinase) family protein
Glyma.08G064300	45	0.0194885	PF01529,PF12796	Ankyrin repeat family protein with DHHC zinc finger domain
Glyma.03G075500	45	0.0322585	PF13041	Pentatricopeptide repeat (PPR-like) superfamily protein
Glyma.14G000100	45	0.0482097		glutamate receptor 2
Glyma.14G078300	44.8974	7.35149e-05
Glyma.08G218100	44.5217	0.000675789	PF01073	cinnamoyl coa reductase 1
Glyma.03G188600	44.5	0.00130113	PF10312,PF09732
Glyma.07G066600	44.5	0.00130113	PF00069	Protein kinase superfamily protein
Glyma.12G214200	44.5	0.00379589	PF01535,PF13041	Tetratricopeptide repeat (TPR)-like superfamily protein
Glyma.08G227500	44.5	0.00605283	PF04434,PF03101,PF10551	FAR1-related sequence 3
Glyma.13G279400	44.5	0.0108525	PF00400	Transducin/WD40 repeat-like superfamily protein
Glyma.13G274500	44.5	0.0387854	PF00069	Protein kinase superfamily protein
Glyma.07G204700	44.3333	0.00329121	PF12923
Glyma.19G208400	44.2222	0.000882545	PF07496	CW-type Zinc Finger
Glyma.19G199500	44.2	0.000169402	PF05920,PF07526	BEL1-like homeodomain 1
Glyma.07G192000	44.2	0.0044166	PF00249,PF00439	bromodomain 4
Glyma.13G066200	44.1667	0.000879109	PF00439	DNA-binding bromodomain-containing protein
Glyma.14G217400	44	0.00159772	PF00270,PF00271,PF00575,PF07717,PF04408	RNA helicase family protein
Glyma.14G216900	44	0.0020106	PF13450,PF04433	LSD1-like 3
Glyma.08G196100	44	0.00284195	PF07303	dentin sialophosphoprotein-related
Glyma.02G122200	44	0.00484429		Chaperone DnaJ-domain superfamily protein
Glyma.11G136100	44	0.00546303	PF03153	Transcription factor IIA, alpha/beta subunit
Glyma.03G211500	44	0.00668054	PF00046	Homeodomain-like superfamily protein
Glyma.05G004100	44	0.009023	PF14259	zinc finger (CCCH-type) family protein / RNA recognition motif (RRM)-containing protein
Glyma.04G039300	44	0.010651	PF00170	abscisic acid responsive elements-binding factor 2
Glyma.01G209300	44	0.0126419	PF12932,PF12931	RGPR-related
Glyma.15G121800	44	0.0237238	PF03874	RNA polymerase II, Rpb4, core protein
Glyma.03G190800	44	0.0239886	PF15629,PF15628	HhH-GPD base excision DNA repair family protein
Glyma.05G192800	44	0.0304867
Glyma.01G217800	44	0.0465377
Glyma.09G242200	44	0.0465377	PF12937,PF00514	ARABIDILLO-1
Glyma.07G042100	43.75	0.00223526	PF12090
Glyma.12G028100	43.6667	0.00419911	PF00397,PF01846	pre-mRNA-processing protein 40C
Glyma.12G068500	43.6	0.000828151	PF14531	geminivirus rep interacting kinase 2
Glyma.13G170000	43.5	0.00280018	PF00439,PF15612,PF01429,PF00628	methyl-CPG-binding domain 9
Glyma.02G293100	43.5	0.00782386	PF04078	Cell differentiation, Rcd1-like protein
Glyma.15G201500	43.5	0.0200696
Glyma.09G276800	43.3636	0.00313304	PF00860	AZA-guanine resistant1
Glyma.01G218800	43.2308	0.0060147	PF08263,PF07714	Leucine-rich repeat protein kinase family protein
Glyma.15G236400	43.2	0.000891843	PF00249	Homeodomain-like protein with RING/FYVE/PHD-type zinc finger domain
Glyma.04G003000	43.2	0.00224163		ARM repeat superfamily protein
Glyma.06G292200	43.0952	0.000165143	PF00069	Protein kinase superfamily protein
Glyma.06G160600	43	0.000567669		Protein kinase superfamily protein
Glyma.04G192300	43	0.00114146	PF14288,PF02364	glucan synthase-like 8
Glyma.16G027500	43	0.00488254
Glyma.05G078300	43	0.00529968	PF00174	sulfite oxidase
Glyma.17G143400	43	0.00529968	PF01987	Tryptophan RNA-binding attenuator protein-like
Glyma.10G193000	43	0.00624508	PF03909	BSD domain (BTF2-like transcription factors, Synapse-associated proteins and DOS2-like proteins)
Glyma.10G216200	43	0.00624508	PF00226,PF12572	DNAJ heat shock N-terminal domain-containing protein
Glyma.12G237700	43	0.00709119	PF13639	RING/U-box superfamily protein
Glyma.06G209700	43	0.0111332	PF01008	NagB/RpiA/CoA transferase-like superfamily protein
Glyma.13G011100	43	0.0111332
Glyma.20G070600	43	0.0137229
Glyma.11G107300	43	0.0138734	PF17047,PF00168	Calcium-dependent lipid-binding (CaLB domain) family protein
Glyma.14G024100	42.6667	0.00195777
Glyma.17G105500	42.6364	0.0106635	PF13639	RING/U-box superfamily protein
Glyma.16G096700	42.6	0.00517217	PF12937,PF00022	actin-related protein 8
Glyma.01G230400	42.5	0.0027963	PF04749	PLAC8 family protein
Glyma.13G288200	42.5	0.00416473	PF09756
Glyma.15G192300	42.4286	0.000932	PF07928	VPS54
Glyma.20G036600	42.4082	0.000121188	PF07891	Protein of unknown function (DUF1666)
Glyma.13G042100	42.25	0.0070873	PF00481	Protein phosphatase 2C family protein
Glyma.10G225800	42.2143	0.000827043	PF01926,PF03144,PF11987	eukaryotic translation initiation factor 2 (eIF-2) family protein
Glyma.11G190900	42.037	0.0042746	PF16487,PF16488,PF08699,PF02170,PF16486,PF02171	Argonaute family protein
Glyma.13G309700	42	0.000235446	PF14634,PF00271,PF00176	Helicase protein with RING/U-box domain
Glyma.18G248600	42	0.00523882	PF01713,PF08590	smr (Small MutS Related) domain-containing protein
Glyma.11G041400	42	0.00523882	PF00335	tobamovirus multiplication 2A
Glyma.02G185000	42	0.0142646	PF08161	ARM repeat superfamily protein
Glyma.06G087500	42	0.0200524	PF00069	Protein kinase family protein
Glyma.01G040900	41.8462	0.00185629	PF00270,PF00271,PF04408,PF07717	RNA helicase family protein
Glyma.09G121700	41.7778	0.00469055	PF00069	Protein kinase superfamily protein
Glyma.06G068500	41.6667	0.00318774	PF13259
Glyma.06G081300	41.6667	0.00463286	PF00743	Flavin-binding monooxygenase family protein
Glyma.10G102200	41.5	0.000831723	PF15477
Glyma.17G246600	41.5	0.00114842	PF04129,PF15277,PF09763	exocyst complex component sec3A
Glyma.04G148300	41.5	0.00290638	PF01636	Protein kinase superfamily protein
Glyma.09G086800	41.4898	0.000307306	PF04137	endoplasmic reticulum oxidoreductins 2
Glyma.11G038800	41.4286	0.0213949	PF00069	Protein kinase superfamily protein
Glyma.01G202600	41.3333	0.00763964	PF13086,PF09416	RNA helicase, putative
Glyma.03G055900	41.25	0.00584013	PF00962	AMP deaminase, putative / myoadenylate deaminase, putative
Glyma.07G192500	41.2424	0.000149663	PF13923,PF00271,PF00176	SNF2 domain-containing protein / helicase domain-containing protein / zinc finger protein-related
Glyma.04G172900	41.2391	0.000441678	PF13304	ABC2 homolog 6
Glyma.12G185500	41.1111	6.9372e-05	PF00786,PF00620	Rho GTPase activating protein with PAK-box/P21-Rho-binding domain
Glyma.08G107500	41	0.0013682	PF00201	indole-3-acetate beta-D-glucosyltransferase
Glyma.01G164100	41	0.0016372	PF03635	VPS35 homolog A
Glyma.04G095600	41	0.00410582
Glyma.02G160100	41	0.00528412	PF10513	Enhancer of polycomb-like transcription factor protein
Glyma.04G090400	41	0.0057587	PF14778	oxidoreductase, zinc-binding dehydrogenase family protein
Glyma.16G033800	41	0.00802613	PF01794,PF08022,PF08030	ferric reduction oxidase 2
Glyma.10G005700	41	0.0102793	PF04147
Glyma.13G201200	41	0.0102793		RING/U-box superfamily protein
Glyma.11G125000	41	0.018145	PF00566	Ypt/Rab-GAP domain of gyp1p superfamily protein
Glyma.09G172000	41	0.0247843	PF00503	extra-large GTP-binding protein 3
Glyma.06G094900	41	0.0324863	PF00400	transducin family protein / WD-40 repeat family protein
Glyma.10G018000	40.95	0.00052737	PF01699	magnesium/proton exchanger
Glyma.09G227500	40.7333	0.0156747	PF01593	polyamine oxidase 1
Glyma.17G038400	40.6667	0.000406641	PF04146	evolutionarily conserved C-terminal region 7
Glyma.13G080300	40.6667	0.00175515		ARM repeat superfamily protein
Glyma.08G114700	40.6667	0.0140999		calmodulin-binding family protein
Glyma.02G042000	40.6648	0.00619264	PF00132,PF06426	serine acetyltransferase 3;2
Glyma.08G113200	40.5	0.00315372	PF00149	protein phosphatase 2A-3
Glyma.13G072500	40.5	0.00342948	PF03571,PF00293	nudix hydrolase homolog 3
Glyma.14G199000	40.5	0.00570583	PF00787,PF09325	sorting nexin 2B
Glyma.12G021900	40.5	0.0240563	PF15612,PF00628,PF02791	DNA binding;zinc ion binding;DNA binding
Glyma.01G063600	40.25	0.000282653	PF08620,PF08621
Glyma.06G003600	40.1364	0.000856914	PF00632	HEAT repeat ;HECT-domain (ubiquitin-transferase)
Glyma.19G083100	40	0.000125433	PF00135	alpha/beta-Hydrolases superfamily protein
Glyma.17G065600	40	0.000235271	PF00370,PF02782	FGGY family of carbohydrate kinase
Glyma.08G143200	40	0.000595414	PF14649
Glyma.08G119700	40	0.00111211	PF04564,PF00514	plant U-box 17
Glyma.20G181000	40	0.00313589	PF02375,PF02373	Zinc finger (C2H2 type) family protein / transcription factor jumonji (jmj) family protein
Glyma.01G070300	40	0.00334212	PF01928,PF00485	Phosphoribulokinase / Uridine kinase family
Glyma.10G146100	40	0.00569177	PF12368,PF03959
Glyma.13G269600	40	0.0136152	PF00646,PF01167	tubby like protein 7
Glyma.01G050400	40	0.0165202		RING/U-box superfamily protein
Glyma.06G088200	40	0.0230487	PF01490	amino acid permease 1
Glyma.13G233500	40	0.0487318	PF02580	D-Tyr-tRNA(Tyr) deacylase family protein
Glyma.15G063700	39.75	0.00121079
Glyma.14G004300	39.6923	5.15432e-05	PF00293	nudix hydrolase homolog 2
Glyma.13G227200	39.6667	0.0123953	PF00400	Transducin/WD40 repeat-like superfamily protein
Glyma.02G075300	39.625	0.00198017	PF01554	MATE efflux family protein
Glyma.15G169800	39.5	0.00036954	PF00400,PF12265	Transducin family protein / WD-40 repeat family protein
Glyma.04G124300	39.5	0.0014822	PF04434,PF10551,PF03101	far-red elongated hypocotyls 3
Glyma.13G025900	39.5	0.00328921	PF07227,PF16312	Protein of unknown function (DUF1423)
Glyma.04G192200	39.5	0.00407826	PF11934,PF01857,PF01858	retinoblastoma-related 1
Glyma.13G003900	39.5	0.0100502	PF07942	S-adenosyl-L-methionine-dependent methyltransferases superfamily protein
Glyma.05G025300	39.4667	0.00176655	PF00834	D-ribulose-5-phosphate-3-epimerase
Glyma.07G141000	39.25	0.000319126
Glyma.20G166200	39.25	0.000982869	PF01926,PF03144,PF11987	eukaryotic translation initiation factor 2 (eIF-2) family protein
Glyma.15G261300	39.25	0.0169633	PF00808	nuclear factor Y, subunit C2
Glyma.18G109100	39.25	0.0367784	PF04652,PF14288,PF02364	glucan synthase-like 7
Glyma.04G111900	39.2273	0.000543803	PF16544	RNA-binding KH domain-containing protein
Glyma.08G223000	39.1429	0.000584318	PF08700,PF16528	exocyst complex component 84B
Glyma.15G069300	39	0.000637363	PF00249,PF00439	bromodomain 4
Glyma.01G006400	39	0.00327046	PF03485,PF05746,PF00750	Arginyl-tRNA synthetase, class Ic
Glyma.03G163000	39	0.00327046	PF04884	Protein of unknown function, DUF647
Glyma.08G014400	39	0.00453447	PF13419	Haloacid dehalogenase-like hydrolase (HAD) superfamily protein
Glyma.06G216800	39	0.00551183	PF01636	Protein kinase superfamily protein
Glyma.15G088100	39	0.00628968	PF01823	MAC/Perforin domain-containing protein
Glyma.15G100500	39	0.00753852	PF13920	RING/U-box superfamily protein
Glyma.10G201000	39	0.00996183	PF02817,PF00364,PF00198	Dihydrolipoamide acetyltransferase, long form protein
Glyma.20G118000	39	0.00996183	PF00753	Metallo-hydrolase/oxidoreductase superfamily protein
Glyma.06G275600	39	0.0117034	PF02358,PF00982	trehalose-phosphatase/synthase 7
Glyma.13G356900	39	0.014757	PF12329,PF12325	golgin candidate 5
Glyma.02G251100	39	0.0209811	PF00171,PF00696	delta 1-pyrroline-5-carboxylate synthase 2
Glyma.10G233500	39	0.0282139	PF04564,PF07714	U-box domain-containing protein kinase family protein
Glyma.19G071300	39	0.0282139	PF01165	Ribosomal protein S21 family protein
Glyma.14G214700	38.8182	7.73945e-05	PF08263,PF00069	receptor-like kinase 1
Glyma.20G013500	38.7857	0.000723423	PF00118,PF01504	FORMS APLOID AND BINUCLEATE CELLS 1C
Glyma.17G229100	38.75	0.00596486	PF07714,PF14381	Protein kinase superfamily protein
Glyma.17G176300	38.6667	0.0223392		Transducin/WD40 repeat-like superfamily protein
Glyma.10G062800	38.6429	0.000811555	PF10358
Glyma.15G016700	38.5	0.00115749	PF12329,PF12325	golgin candidate 5
Glyma.03G178500	38.5	0.00824387	PF00270,PF00271	P-loop containing nucleoside triphosphate hydrolases superfamily protein
Glyma.13G137000	38.3333	0.00378509	PF00855	Tudor/PWWP/MBT superfamily protein
Glyma.01G172400	38.3333	0.0217038	PF00719	pyrophosphorylase 4
Glyma.10G127400	38.125	0.000247372	PF08543	hydroxyethylthiazole kinase family protein
Glyma.16G201500	38.1	0.00291093	PF00069,PF07714	Protein kinase superfamily protein
Glyma.U040600	38	0.00326468	PF00394,PF07731	Cupredoxin superfamily protein
Glyma.11G127400	38	0.00621597	PF03101	Far-red impaired responsive (FAR1) family protein
Glyma.17G069800	38	0.00714492	PF05761	HAD-superfamily hydrolase, subfamily IG, 5'-nucleotidase
Glyma.08G019800	38	0.00742801
Glyma.01G077400	38	0.00774314	PF04987	transferases;sulfuric ester hydrolases;catalytics;transferases
Glyma.19G049500	38	0.00892842	PF10513	Enhancer of polycomb-like transcription factor protein
Glyma.19G021700	38	0.00901625	PF10350
Glyma.05G052900	38	0.0185157	PF00472	Class I peptide chain release factor
Glyma.11G158300	38	0.0185157
Glyma.15G256700	38	0.025999	PF13579,PF13692	UDP-Glycosyltransferase superfamily protein
Glyma.08G311000	38	0.025999	PF13371,PF08321,PF00149	protein phosphatase 5.2
Glyma.02G147600	38	0.0262588	PF08355,PF08356	MIRO-related GTP-ase 2
Glyma.10G243400	38	0.0445518	PF00400,PF00069,PF02138	protein serine/threonine kinases;protein tyrosine kinases;ATP binding;protein kinases
Glyma.12G020000	37.8571	0.00054605	PF11891	Protein of unknown function (DUF3411)
Glyma.03G133500	37.75	0.000559673	PF00226,PF13414	Heat shock protein DnaJ with tetratricopeptide repeat
Glyma.12G077400	37.6667	0.000660005		ATP-dependent helicase family protein
Glyma.19G226700	37.6667	0.00604108	PF00479,PF02781	glucose-6-phosphate dehydrogenase 4
Glyma.08G269000	37.5556	0.00980704	PF03470,PF03468,PF03469	XH/XS domain-containing protein
Glyma.08G127200	37.5	0.00450756	PF01501,PF06427	UDP-glucose:glycoprotein glucosyltransferases;transferases, transferring hexosyl groups;transferases, transferring glycosyl groups
Glyma.10G222200	37.5	0.00688941	PF00069	Protein kinase superfamily protein
Glyma.02G144500	37.5	0.00688941	PF00069,PF00481	Protein phosphatase 2C family protein
Glyma.17G153200	37.4016	0.01065	PF14572,PF13793	Phosphoribosyltransferase family protein
Glyma.06G166700	37.25	0.00478906	PF01529	DHHC-type zinc finger family protein
Glyma.19G041600	37.25	0.0193836	PF14416,PF13839	TRICHOME BIREFRINGENCE-LIKE 19
CYP98A2	37.0833	0.0299794	PF00067	CYTOCHROME P450 98A3-RELATED
Glyma.08G053300	37	0.00265078		golgin candidate 2
Glyma.08G152100	37	0.0032004	PF00684,PF00226,PF01556	gametophytic factor 2
Glyma.17G257300	37	0.00429363	PF12776
Glyma.20G130800	37	0.00628141	PF00628,PF00046	Homeodomain-like protein with RING/FYVE/PHD-type zinc finger domain
Glyma.13G197000	37	0.00690931	PF00703,PF16353,PF02837,PF02929,PF02836	glycoside hydrolase family 2 protein
Glyma.02G312100	37	0.0112967
Glyma.08G305800	37	0.0112967
Glyma.17G245800	37	0.0112967
Glyma.02G169600	37	0.0134202	PF00271,PF00270	P-loop containing nucleoside triphosphate hydrolases superfamily protein
Glyma.16G038800	37	0.0237032	PF00076	RNA binding (RRM/RBD/RNP motifs) family protein
Glyma.10G289800	36.6667	0.0057954	PF04762	IKI3 family protein
Glyma.01G142700	36.5	9.31621e-05	PF00270,PF07717,PF00271,PF04408	RNA helicase family protein
Glyma.11G032400	36.5	0.00376288	PF00226,PF11875	DNAJ heat shock N-terminal domain-containing protein
Glyma.04G058300	36.5	0.00413099	PF01753,PF13423	ubiquitin-specific protease 19
Glyma.10G012600	36.5	0.0155387	PF00856	SET domain-containing protein
Glyma.11G028300	36.5	0.0155387	PF08263,PF00560,PF13855,PF00069	Leucine-rich repeat protein kinase family protein
Glyma.08G251400	36.5	0.0282854	PF14817
Glyma.15G173300	36.4615	0.00472012	PF02045	nuclear factor Y, subunit A3
Glyma.12G067700	36.4	0.00044525	PF13848,PF00085	PDI-like 1-4
Glyma.02G125200	36.2857	0.000573335	PF00010	basic helix-loop-helix (bHLH) DNA-binding superfamily protein
Glyma.17G104100	36.2857	0.00561618	PF14709,PF04851,PF02170,PF00271,PF03368,PF00636	dicer-like 4
Glyma.18G066700	36.2857	0.0107142
Glyma.18G142500	36.1429	0.000954319	PF01326	Pyruvate phosphate dikinase, PEP/pyruvate binding domain
Glyma.03G179800	36	0.00533482	PF13371,PF00515,PF13414,PF00226	homolog of mamallian P58IPK
Glyma.13G287000	36	0.0059386	PF12490	homolog of yeast autophagy 18 (ATG18) F
Glyma.15G096500	36	0.00661566
Glyma.07G079700	36	0.00790898	PF01656	P-loop containing nucleoside triphosphate hydrolases superfamily protein
Glyma.09G206000	36	0.0109551	PF09335	SNARE associated Golgi protein family
Glyma.19G144900	36	0.0178782	PF12695
Glyma.17G156700	36	0.0178782	PF04784,PF03619	Protein of unknown function (DUF300)
Glyma.15G098200	36	0.0216588	PF00646,PF01167	tubby like protein 3
Glyma.02G114800	36	0.0216588	PF00560,PF13855	Leucine-rich repeat (LRR) family protein
Glyma.15G249000	36	0.0301261		RING/U-box superfamily protein
Glyma.15G140800	36	0.0399004	PF05182	homolog of yeast FIP1 [V]
Glyma.13G113900	35.9231	0.000219546		alpha/beta-Hydrolases superfamily protein
Glyma.10G007600	35.9091	0.00360451	PF02451
Glyma.10G212600	35.8	0.00131687	PF00249	Duplicated homeodomain-like superfamily protein
Glyma.17G121400	35.7308	0.0017188	PF01624,PF05188,PF05190,PF05192,PF00488	MUTS homolog 2
Glyma.12G036400	35.6667	0.000368846	PF00170	Basic-leucine zipper (bZIP) transcription factor family protein
Glyma.05G237500	35.5221	1.47485e-05	PF13639,PF05495,PF14599,PF01814	zinc finger protein-related
Glyma.10G257100	35.5	0.00617314		cyclin-related
Glyma.07G104200	35.4	0.00782921	PF00293	nudix hydrolase homolog 4
Glyma.15G266600	35.3846	0.00285307	PF07722,PF06418	CTP synthase family protein
Glyma.07G194500	35.3333	0.000923628	PF07814	WAPL (Wings apart-like protein regulation of heterochromatin) protein
Glyma.15G028100	35.3333	0.00192863
Glyma.06G196900	35.1429	0.000291747	PF07714	Protein kinase superfamily protein
Glyma.04G067000	35.1364	0.000717894	PF13259
Glyma.13G172200	35	0.00160206	PF05918	Apoptosis inhibitory protein 5 (API5)
Glyma.05G026300	35	0.0056551	PF01073,PF02866	malate dehydrogenase
Glyma.15G100800	35	0.00690809	PF03399	SAC3/GANP/Nin1/mts3/eIF-3 p25 family
Glyma.10G023700	35	0.00690809	PF12166
Glyma.02G013400	35	0.00708668		Tetratricopeptide repeat (TPR)-like superfamily protein
Glyma.03G057600	35	0.00708668	PF11935,PF12295	HEAT repeat-containing protein
Glyma.03G173600	35	0.00763953	PF07714	FUS3-complementing gene 1
Glyma.16G024100	35	0.00913351		embryo defective 1703
Glyma.04G232800	35	0.00934699
Glyma.20G202700	35	0.0103202	PF00022	actin-related protein 9
Glyma.08G192400	35	0.0129209
Glyma.08G040300	35	0.0274065	PF00022	actin-related protein 4
Glyma.05G023300	35	0.0274065	PF16501
Glyma.17G238600	35	0.0274065	PF11523	Protein of unknown function (DUF3223)
Glyma.09G089400	35	0.0449783	PF08164,PF13339	rRNA processing protein-related
Glyma.14G071900	34.9444	0.000477951	PF03765,PF00650	Sec14p-like phosphatidylinositol transfer family protein
Glyma.15G267700	34.8	0.000805288	PF13347	Major facilitator superfamily protein
Glyma.17G112500	34.7857	0.012532	PF00400	WUS-interacting protein 2
Glyma.04G130300	34.75	0.000393071	PF11717,PF01853	histone acetyltransferase of the MYST family 1
Glyma.08G010100	34.75	0.000623208	PF00240	Ubiquitin family protein
Glyma.07G067000	34.7209	0.00207986	PF12708	Pectin lyase-like superfamily protein
Glyma.10G003800	34.6667	0.00233467	PF00515,PF13414	Tetratricopeptide repeat (TPR)-like superfamily protein
Glyma.08G000200	34.6667	0.0057457
Glyma.10G224900	34.625	0.000615626	PF00646,PF01167	tubby like protein 10
Glyma.15G031900	34.5	0.00144836	PF00270,PF00271,PF07717,PF04408	RNA helicase family protein
Glyma.13G037600	34.5	0.00457963	PF01803	SEUSS transcriptional co-regulator
Glyma.09G232400	34.5	0.00823302	PF07714	AGC (cAMP-dependent, cGMP-dependent and protein kinase C) kinase family protein
Glyma.17G153700	34.5	0.00823302	PF10260	ubiquitin family protein
Glyma.08G163700	34.5	0.00998095	PF00171	aldehyde dehydrogenase 5F1
Glyma.09G251200	34.5	0.0143103	PF00642	zinc finger protein 1
Glyma.20G100700	34.5	0.041448
Glyma.18G109600	34.3889	0.00259733	PF03188	Cytochrome b561/ferric reductase transmembrane protein family
Glyma.15G102000	34.3333	0.00226805	PF03951,PF00120	glutamine synthetase 2
Glyma.07G034300	34.3333	0.00411549	PF07719,PF12569	tetratricopeptide repeat (TPR)-containing protein
Glyma.15G025300	34.1768	0.0109682		calmodulin-binding family protein
Glyma.05G035100	34.1667	0.000345473	PF08711	BAH domain ;TFIIS helical bundle-like domain
Glyma.04G146000	34.1667	0.0140327	PF02002	Transcription factor TFIIE, alpha subunit
Glyma.11G024700	34.1333	0.000474363	PF08263,PF07714	Leucine-rich repeat protein kinase family protein
Glyma.09G212100	34.1111	0.0286303	PF01852,PF07059	ENHANCED DISEASE RESISTANCE 2
Glyma.14G001200	34	0.000225756	PF13202,PF12763	Calcium-binding EF hand family protein
Glyma.13G059400	34	0.000718846		chorismate mutase 1
Glyma.19G132900	34	0.00412418	PF01734,PF11815	Patatin-like phospholipase family protein
Glyma.03G014900	34	0.00412418	PF04851,PF00271	DEA(D/H)-box RNA helicase family protein
Glyma.05G228800	34	0.00716931	PF10639
Glyma.08G290100	34	0.00881993	PF00249	Duplicated homeodomain-like superfamily protein
Glyma.11G120700	34	0.00881993	PF00400,PF09070,PF08324	transducin family protein / WD-40 repeat family protein
Glyma.09G174000	34	0.0114811	PF07714	Protein kinase superfamily protein
Glyma.17G097200	34	0.0114811
Glyma.06G032400	34	0.0250896	PF03765,PF00650	Sec14p-like phosphatidylinositol transfer family protein
Glyma.10G179200	34	0.0461283	PF04674	EXORDIUM like 5
Glyma.03G134200	33.9375	0.00316079	PF00690,PF12515,PF12710,PF00689,PF00122	autoinhibited Ca2+-ATPase 11
Glyma.13G135300	33.9167	0.00354861	PF00481	Protein phosphatase 2C family protein
Glyma.19G237800	33.8966	0.000249472	PF03917	glutathione synthetase 2
Glyma.10G284500	33.878	0.0065171	PF10497,PF02373	Transcription factor jumonji (jmjC) domain-containing protein
Glyma.16G051500	33.8333	0.000112762	PF13915,PF13889
Glyma.12G192700	33.8	0.00330375	PF00097,PF00271,PF00176	Helicase protein with RING/U-box domain
Glyma.02G175400	33.75	0.00736772	PF03311	Cornichon family protein
Glyma.02G044300	33.7	0.00367978	PF13441,PF13639	NEP-interacting protein 2
Glyma.01G008700	33.6721	0.000333442	PF05183	RNA-dependent RNA polymerase family protein
Glyma.02G304100	33.6667	0.00140191	PF17048,PF04734	Neutral/alkaline non-lysosomal ceramidase
Glyma.10G078500	33.625	0.0106111	PF03641	Putative lysine decarboxylase family protein
Glyma.04G186400	33.6	0.0101551	PF17098	FKBP12 interacting protein 37
Glyma.19G130200	33.6	0.0191884	PF07716,PF14144	TGACG motif-binding factor 6
Glyma.17G136900	33.5	0.0041506	PF09335	SNARE associated Golgi protein family
Glyma.08G336400	33.5	0.0205797	PF11919,PF16507	proteasome activating protein 200
Glyma.13G089400	33.5	0.0335094		Molecular chaperone Hsp40/DnaJ family protein
Glyma.17G008400	33.4333	0.000306734	PF00240,PF00632	ubiquitin protein ligase 5
Glyma.13G009500	33.35	0.0054885	PF00730	DNA glycosylase superfamily protein
Glyma.01G238300	33.3333	0.00280697	PF00628,PF16135	Acyl-CoA N-acyltransferase with RING/FYVE/PHD-type zinc finger protein
Glyma.19G117700	33.3333	0.0034286	PF07741,PF00382	Cyclin/Brf1-like TBP-binding protein
Glyma.18G213600	33.2667	0.000235736	PF08263,PF00560,PF13855,PF00069	Leucine-rich receptor-like protein kinase family protein
Glyma.11G157400	33.25	0.00437786	PF13445,PF07714,PF13857,PF13637,PF12796	protein kinases;ubiquitin-protein ligases
Glyma.08G292600	33	0.00147659	PF02181	formin 8
Glyma.05G100500	33	0.00251292	PF08513,PF00400	WD-40 repeat family protein
Glyma.11G062100	33	0.00534005	PF05033,PF00856	nucleic acid binding;sequence-specific DNA binding transcription factors;zinc ion binding
Glyma.11G194000	33	0.00639959	PF10294	S-adenosyl-L-methionine-dependent methyltransferases superfamily protein
Glyma.01G099600	33	0.00764921	PF00069	Protein kinase superfamily protein
Glyma.01G200700	33	0.00764921	PF00335	tobamovirus multiplication 2A
Glyma.09G281400	33	0.00764921	PF01529	DHHC-type zinc finger family protein
Glyma.03G236500	33	0.00764921	PF00887,PF01344,PF13415	acyl-CoA binding protein 4
Glyma.07G133000	33	0.00850964		TRF-like 2
Glyma.12G000600	33	0.00850964
Glyma.02G174700	33	0.0105376
Glyma.03G006100	33	0.014172		GDSL-like Lipase/Acylhydrolase superfamily protein
Glyma.06G115200	33	0.0146122	PF12937	F-box protein 7
Glyma.02G028900	33	0.0146122	PF00413	matrix metalloproteinase
Glyma.01G028700	33	0.0147038	PF08263,PF00069	NSP-interacting kinase 3
Glyma.02G026700	33	0.017361	PF08295,PF02671,PF16879	SIN3-like 4
Glyma.04G114900	33	0.0220498	PF05699,PF04937	hAT dimerisation domain-containing protein / transposase-related
Glyma.16G049600	33	0.0321519	PF02854,PF09090,PF09088	ARM repeat superfamily protein
Glyma.19G077200	33	0.0435969	PF12937	Ribonuclease inhibitor
Glyma.15G162000	33	0.0437088	PF00069	lectin protein kinase family protein
Glyma.15G021000	32.75	0.00176478	PF13541,PF13481	ATP-dependent peptidases;nucleotide binding;serine-type endopeptidases;DNA helicases;ATP binding;damaged DNA binding;nucleoside-triphosphatases
Glyma.13G124600	32.75	0.014895	PF00271,PF00176	chromatin remodeling 8
Glyma.10G169600	32.7333	0.00262189	PF00646,PF14299	phloem protein 2-B10
Glyma.09G014600	32.7143	0.000709334		binding
Glyma.10G036800	32.6667	0.000671077	PF07690	phosphate transporter 1;4
Glyma.05G127500	32.6667	0.00171694	PF07885	Ca2+ activated outward rectifying K+ channel 6
Glyma.17G200600	32.5714	0.0034806	PF08312
Glyma.13G273900	32.5455	0.00899396
Glyma.09G057700	32.5	0.00365408	PF06862
Glyma.14G117800	32.5	0.00460713	PF07728	P-loop containing nucleoside triphosphate hydrolases superfamily protein
Glyma.10G053600	32.5	0.00511757	PF00278,PF02784	Pyridoxal-dependent decarboxylase family protein
Glyma.19G126800	32.5	0.00511757	PF00170	Basic-leucine zipper (bZIP) transcription factor family protein
Glyma.03G019500	32.5	0.0211758	PF00462,PF00610,PF04784	glutaredoxin-related
Glyma.07G162100	32.5	0.0481473	PF07393	exocyst complex component sec10
Glyma.10G135500	32.4	0.000791864		F-box/RNI-like/FBD-like domains-containing protein
Glyma.05G205900	32.3423	0.00027851	PF03763	Remorin family protein
Glyma.16G121900	32.3333	0.00374204	PF13441	NEP-interacting protein 2
Glyma.10G280700	32.25	0.00053918	PF00626,PF04810,PF04815,PF08033,PF04811	Sec23/Sec24 protein transport family protein
Glyma.07G069000	32.25	0.00220327	PF00954,PF01453,PF00069	receptor-like protein kinase 4
Glyma.13G091900	32.2222	0.00034488	PF13857,PF12796	XB3 ortholog 2 in Arabidopsis thaliana
Glyma.13G128500	32.1667	0.000332849	PF13921	myb family transcription factor
Glyma.02G165400	32	0.000114324	PF00270	P-loop containing nucleoside triphosphate hydrolases superfamily protein
Glyma.08G257500	32	0.000674693	PF13837	Homeodomain-like superfamily protein
Glyma.04G044000	32	0.00138736	PF01566	NRAMP metal ion transporter 2
Glyma.11G071000	32	0.00283906		auxin-like 1 protein
Glyma.08G331900	32	0.00841126	PF01000,PF01193	RNA polymerase I subunit 43
Glyma.11G202700	32	0.00991953		hydroxyproline-rich glycoprotein family protein
Glyma.11G203600	32	0.0153689	PF07466
Glyma.04G000200	32	0.0166044	PF00850	histone deacetylase 1
Glyma.17G143300	32	0.017302	PF13696,PF08783	DWNN domain, a CCHC-type zinc finger
Glyma.18G003300	32	0.0290602		Pentatricopeptide repeat (PPR) superfamily protein
Glyma.17G049200	32	0.0305078
Glyma.08G349900	32	0.036048	PF00536	Sterile alpha motif (SAM) domain-containing protein
Glyma.10G135300	31.9863	0.000524556
Glyma.07G069400	31.75	0.00186738	PF04851,PF08880,PF00271	transcription regulatory protein SNF2, putative
Glyma.06G310500	31.75	0.00197697	PF12705,PF13086,PF13087	DNA replication helicase, putative
Glyma.02G146500	31.6923	0.000782974	PF16135	Acyl-CoA N-acyltransferase with RING/FYVE/PHD-type zinc finger protein
Glyma.06G159500	31.6667	0.00760095	PF02493,PF01504	phosphatidylinositol-4-phosphate 5-kinase 1
Glyma.07G039600	31.6667	0.0352192	PF01966,PF04607	RELA/SPOT homolog 3
Glyma.16G016700	31.625	0.00489804	PF02365	NAC transcription factor-like 9
Glyma.09G223300	31.6	0.020046	PF14370,PF01028,PF02919	DNA topoisomerase 1 beta
Glyma.11G141400	31.5	0.00461306
Glyma.19G000100	31.5	0.00487008	PF01535,PF13041	Pentatricopeptide repeat (PPR-like) superfamily protein
Glyma.13G259300	31.3333	0.00133193	PF04502	Family of unknown function (DUF572)
Glyma.13G364900	31.3333	0.0187508	PF00168,PF00614,PF12357	phospholipase D alpha 1
Glyma.10G129800	31.25	0.00636174		transducin family protein / WD-40 repeat family protein
Glyma.08G214900	31.1236	0.00124142	PF16987
Glyma.04G090200	31.1	0.0034246
Glyma.06G074400	31.0909	0.0397817	PF04570	Protein of unknown function (DUF581)
Glyma.07G088200	31	0.000236441	PF01740,PF00916	sulfate transporter 3;5
Glyma.20G217700	31	0.0047101		RING/FYVE/PHD zinc finger superfamily protein
Glyma.10G292700	31	0.0060357	PF06807,PF16573,PF10607,PF16575	LisH/CRA/RING-U-box domains-containing protein
Glyma.06G108300	31	0.0060357	PF05699	hAT dimerisation domain-containing protein / transposase-related
Glyma.17G109600	31	0.00933657	PF07714	calmodulin-binding receptor-like cytoplasmic kinase 3
Glyma.09G207200	31	0.0100253	PF12174	WWE protein-protein interaction domain protein family
Glyma.15G000800	31	0.0119979	PF02536	Mitochondrial transcription termination factor family protein
Glyma.07G242700	31	0.0119979	PF14383,PF14309
Glyma.20G174000	31	0.0376708	PF11961,PF05003	Protein of unknown function (DUF668)
Glyma.12G129800	30.75	0.00944545	PF02358,PF00982	trehalose-phosphatase/synthase 7
Glyma.13G042600	30.75	0.0267855	PF00925,PF00926	GTP cyclohydrolase II
Glyma.04G164200	30.6667	0.00122588
Glyma.14G087700	30.6667	0.00203421	PF12174,PF05236	TBP-associated factor 4
Glyma.13G241400	30.6667	0.010619	PF03031,PF00035	C-terminal domain phosphatase-like 1
Glyma.09G234500	30.5	0.00297944	PF02862	shoot gravitropism 2 (SGR2)
Glyma.08G153100	30.5	0.00682757	PF01480,PF00076	RNA binding (RRM/RBD/RNP motifs) family protein
Glyma.10G209000	30.5	0.00856034	PF00806,PF07990	pumilio 4
Glyma.19G188800	30.4	0.00100827	PF10312,PF09732
Glyma.09G226400	30.3333	0.00119057	PF12931	transducin family protein / WD-40 repeat family protein
Glyma.13G293300	30.3333	0.00133217
Glyma.06G167700	30.3333	0.00386276	PF08766	DEK domain-containing chromatin associated protein
Glyma.04G049800	30.3333	0.039248	PF10258
Glyma.03G124700	30.0833	0.000896114	PF08711	Transcription elongation factor (TFIIS) family protein
Glyma.02G014000	30.0667	0.000202638	PF13098,PF07749	thioredoxin family protein
Glyma.09G222900	30	0.00183045
Glyma.20G136300	30	0.00348349	PF05770	Inositol 1,3,4-trisphosphate 5/6-kinase family protein
Glyma.10G217200	30	0.00496439	PF08700	exocyst complex component sec5
Glyma.02G229700	30	0.00512975	PF09358,PF16191,PF16190,PF10585,PF00899	ubiquitin activating enzyme 2
Glyma.04G254900	30	0.00644228	PF13589,PF01119,PF16413	MUTL-homologue 1
Glyma.15G013800	30	0.00644228	PF00400,PF04053	Coatomer, beta' subunit
Glyma.07G208400	30	0.0077933	PF01367,PF02739	5'-3' exonuclease family protein
Glyma.19G078200	30	0.00891628	PF07859	alpha/beta-Hydrolases superfamily protein
Glyma.13G028000	30	0.00891628	PF00098	zinc knuckle (CCHC-type) family protein
Glyma.15G261600	30	0.0109073	PF00271,PF00270	RNA helicase 36
Glyma.10G274500	30	0.0112657
Glyma.09G012600	30	0.0112657	PF01426,PF05641	agenet domain-containing protein / bromo-adjacent homology (BAH) domain-containing protein
Glyma.16G131100	30	0.0112657	PF07798	Protein of unknown function (DUF1640)
Glyma.15G099900	30	0.0151981	PF03171	2-oxoglutarate (2OG) and Fe(II)-dependent oxygenase superfamily protein
Glyma.07G056700	30	0.0228264	PF01909	nucleotidyltransferases
Glyma.01G179100	30	0.034446	PF07714	Protein kinase superfamily protein
Glyma.15G084700	30	0.0346091	PF14432,PF01535,PF13041	Pentatricopeptide repeat (PPR) superfamily protein
Glyma.05G165200	30	0.0346091	PF00248	NAD(P)-linked oxidoreductase superfamily protein
Glyma.12G172700	29.8571	0.00172792	PF00069	Protein kinase superfamily protein
Glyma.02G196500	29.7805	0.00246095	PF05920,PF07526	BEL1-like homeodomain 1
Glyma.07G078000	29.7778	0.00119212	PF00931	NB-ARC domain-containing disease resistance protein
Glyma.17G071400	29.75	0.000533346	PF10377
Glyma.08G044700	29.6963	5.44477e-05	PF13639,PF05495,PF14599,PF01814	zinc finger protein-related
Glyma.18G274000	29.6667	0.00139623	PF12678	RING/U-box superfamily protein
Glyma.17G191000	29.6667	0.00140091	PF03127,PF00790	ENTH/VHS/GAT family protein
Glyma.09G264800	29.6667	0.0229112		F-box family protein
Glyma.10G081700	29.6049	0.00671255	PF05920,PF07526	BEL1-like homeodomain 1
Glyma.05G167600	29.5	0.00547975	PF13857,PF07714	Integrin-linked protein kinase family
Glyma.08G298500	29.5	0.0122635	PF13347	sucrose transporter 2
Glyma.04G229400	29.5	0.0236725	PF07145,PF14259,PF00076	CTC-interacting domain 11
Glyma.14G152300	29.5	0.0329842	PF14541,PF14543	Eukaryotic aspartyl protease family protein
Glyma.05G070500	29.4324	0.00103002	PF14572,PF13793	Phosphoribosyltransferase family protein
Glyma.17G016200	29.4	0.00410095	PF01256	pfkB-like carbohydrate kinase family protein
Glyma.08G076800	29.3688	0.000973565	PF00892	nodulin MtN21 /EamA-like transporter family protein
Glyma.08G229800	29.3333	0.0219345	PF00400	Transducin/WD40 repeat-like superfamily protein
Glyma.13G032500	29.3333	0.0219345	PF08729	wound-responsive family protein
Glyma.01G045100	29.2727	0.00429729	PF01344	Galactose oxidase/kelch repeat superfamily protein
Glyma.09G199800	29.0769	0.000321334	PF00847	AINTEGUMENTA-like 6
Glyma.13G181400	29	0.0017145	PF07714	Protein kinase superfamily protein
Glyma.08G061700	29	0.00544833	PF01363	phosphoinositide binding
Glyma.17G186900	29	0.00544833	PF00133	ATP binding;valine-tRNA ligases;aminoacyl-tRNA ligases;nucleotide binding;ATP binding;aminoacyl-tRNA ligases
Glyma.10G169000	29	0.00689638	PF05253
Glyma.10G218000	29	0.00961228	PF11961,PF05003	Protein of unknown function (DUF668)
Glyma.07G055500	29	0.00961228	PF00240,PF00454	phosphoinositide 4-kinase gamma 4
Glyma.20G078100	29	0.0110112	PF00560,PF08263,PF13855,PF00069	Leucine-rich repeat receptor-like protein kinase family protein
Glyma.06G000800	29	0.0138179	PF03619	Protein of unknown function (DUF300)
Glyma.14G034300	29	0.0138179	PF00046	Homeodomain-like superfamily protein
Glyma.15G192700	29	0.0199311		Outer arm dynein light chain 1 protein
Glyma.07G078100	29	0.0253583		NB-ARC domain-containing disease resistance protein
Glyma.16G150400	29	0.0253583	PF02338	Cysteine proteinases superfamily protein
Glyma.18G196600	29	0.0272207
Glyma.15G111700	29	0.0310359	PF00573	Ribosomal protein L4/L1 family
Glyma.20G043000	29	0.0310359	PF00682	Aldolase superfamily protein
Glyma.05G204000	29	0.0313073	PF00899	SUMO activating enzyme 1B
Glyma.15G209600	29	0.0324408	PF14634	RING/U-box superfamily protein
Glyma.05G168800	29	0.0448908	PF00069	Protein kinase superfamily protein
Glyma.13G293200	28.9231	0.00364096	PF00025	RAB GTPase homolog A1F
Glyma.02G029600	28.8571	0.000372312	PF00226	ARG1-like 1
Glyma.14G166000	28.8	0.0101062	PF14531	MAPK/ERK kinase kinase 1
Glyma.13G256100	28.75	0.000571446	PF01926,PF02212,PF01031	dynamin-related protein 3A
Glyma.02G090100	28.5219	0.00143149	PF01554	MATE efflux family protein
HOP1	28.5	0.00549556	PF00515, PF13414	hsp70-Hsp90 organizing protein 1
Glyma.09G282700	28.5	0.00787483	PF00067	cytochrome P450, family 86, subfamily B, polypeptide 1
Glyma.14G097800	28.5	0.00787483	PF10294,PF08242	S-adenosyl-L-methionine-dependent methyltransferases superfamily protein
Glyma.19G235900	28.5	0.0134532	PF04893	Integral membrane Yip1 family protein
Glyma.18G246900	28.5	0.0182474		Thioesterase/thiol ester dehydrase-isomerase superfamily protein
Glyma.13G044100	28.4762	0.0018853	PF02458	HXXXD-type acyl-transferase family protein
Glyma.08G194500	28.4	0.000795211	PF07714	Protein kinase protein with adenine nucleotide alpha hydrolases-like domain
Glyma.18G239200	28.4	0.0113928		GRIP-related ARF-binding domain-containing protein 1
Glyma.14G050200	28.381	0.00128015	PF13920	histone mono-ubiquitination 2
Glyma.05G002000	28.3333	0.000395655	PF05701	Plant protein of unknown function (DUF827)
Glyma.15G053400	28.3333	0.00517599	PF02705	K+ uptake permease 7
Glyma.05G018800	28.3	0.00993064	PF00319,PF01486	AGAMOUS-like 8
Glyma.06G295600	28.2857	0.00338713
Glyma.17G042800	28.25	0.000394767	PF02309	indole-3-acetic acid inducible 31
Glyma.13G324500	28.25	0.00266199	PF00271	ATP-dependent helicase family protein
Glyma.02G157800	28.1818	0.00529223	PF08711	Transcription elongation factor (TFIIS) family protein
Glyma.19G069300	28.1724	0.00145412	PF13947,PF07714	Protein kinase superfamily protein
Glyma.08G251800	28.1711	0.0021223	PF07734,PF00646	F-box family protein
Glyma.18G281800	28.125	0.0005481	PF13837	Homeodomain-like superfamily protein
Glyma.04G149900	28	0.00383909	PF12695	alpha/beta-Hydrolases superfamily protein
Glyma.02G027200	28	0.00580206	PF02181	formin 8
Glyma.15G136000	28	0.00902364	PF02719	NAD(P)-binding Rossmann-fold superfamily protein
Glyma.10G201900	28	0.0105295	PF08700	Vps51/Vps67 family (components of vesicular transport) protein
Glyma.09G032800	28	0.0107292	PF00226,PF14901	Chaperone DnaJ-domain superfamily protein
Glyma.16G221300	28	0.0107292	PF01535,PF13041	Pentatricopeptide repeat (PPR-like) superfamily protein
Glyma.20G060500	28	0.0120435
Glyma.05G012400	28	0.0133022	PF00226,PF14237	DNAJ heat shock N-terminal domain-containing protein
Glyma.19G127100	28	0.0165383	PF05496,PF00004	Cam interacting protein 111
Glyma.08G019600	28	0.0165383	PF02705	Potassium transporter family protein
Glyma.12G051000	28	0.0165383	PF07744,PF00076	RNA binding
Glyma.04G091300	28	0.01798	PF14686,PF14683,PF06045	Rhamnogalacturonate lyase family protein
Glyma.03G018600	28	0.0218695	PF09138	Ubiquitin related modifier 1
Glyma.03G186500	28	0.0274365	PF04003,PF00400	transducin family protein / WD-40 repeat family protein
Glyma.04G255900	28	0.0274365	PF13417	Thioredoxin family protein
Glyma.15G207200	28	0.0412978	PF16177,PF00501	acyl-activating enzyme 17
Glyma.14G064400	27.9651	0.00033004	PF05922,PF00082	Subtilase family protein
Glyma.19G132300	27.9118	3.7871e-05	PF00072	response regulator 9
Glyma.11G085900	27.8889	0.00436904	PF08596	Transducin/WD40 repeat-like superfamily protein
Glyma.03G172200	27.875	0.000464062	PF01399	eukaryotic translation initiation factor 3A
Glyma.13G149700	27.7843	0.00372529	PF13837
Glyma.04G017600	27.75	0.00570277		thiazole biosynthetic enzyme, chloroplast (ARA6) (THI1) (THI4)
Glyma.04G207600	27.7262	0.00359501	PF00564,PF00571	CBS / octicosapeptide/Phox/Bemp1 (PB1) domains-containing protein
Glyma.19G012100	27.7143	0.0002523	PF14416,PF13839	TRICHOME BIREFRINGENCE-LIKE 22
Glyma.02G244400	27.6667	0.00131902	PF08263,PF00069	receptor-like kinase 1
Glyma.20G239800	27.6667	0.00363798	PF00005,PF00664	P-glycoprotein 20
Glyma.05G064700	27.6667	0.0236932	PF01027	BAX inhibitor 1
Glyma.12G211700	27.5833	2.8901e-05	PF07847	Protein of unknown function (DUF1637)
Glyma.08G345400	27.5714	0.0133028	PF03188,PF04526	Auxin-responsive family protein
Glyma.08G216900	27.5	0.00705524
Glyma.13G239900	27.5	0.00850092	PF01728	S-adenosyl-L-methionine-dependent methyltransferases superfamily protein
Glyma.10G158800	27.5	0.0110788	PF07714	Protein kinase superfamily protein
Glyma.06G142700	27.5	0.0148099	PF04564	RING/U-box superfamily protein
Glyma.02G169200	27.5	0.0259626	PF00149	protein phosphatase 2A-4
Glyma.18G076300	27.5	0.039513	PF02146	sirtuin 1
Glyma.07G228200	27.3333	0.00180025	PF10250	O-fucosyltransferase family protein
Glyma.18G209000	27.3333	0.0111269
Glyma.06G307700	27.2857	0.000777749	PF03106	WRKY family transcription factor
Glyma.17G088200	27.25	0.00284537	PF04006
Glyma.09G017700	27.2	0.00235421	PF00400	Transducin/WD40 repeat-like superfamily protein
Glyma.03G093600	27.1429	0.0138492	PF03094	Seven transmembrane MLO family protein
Glyma.16G042900	27.0909	0.000351558	PF02365	Arabidopsis NAC domain containing protein 87
Glyma.12G013200	27.0833	0.0052873	PF07690	phosphate starvation-induced gene 3
Glyma.18G077600	27.0645	0.00042842	PF08766	DEK domain-containing chromatin associated protein
Glyma.07G242500	27	0.00251914	PF08969,PF01398	associated molecule with the SH3 domain of STAM 3
Glyma.08G060600	27	0.00335995	PF13812,PF12854,PF13041	Pentatricopeptide repeat (PPR) superfamily protein
Glyma.17G204700	27	0.00379884	PF10513	Enhancer of polycomb-like transcription factor protein
Glyma.15G107800	27	0.00619659	PF13921	Homeodomain-like superfamily protein
Glyma.09G155400	27	0.00619659	PF00226,PF11926	DNAJ heat shock N-terminal domain-containing protein
Glyma.01G038300	27	0.00853657	PF08295,PF02671,PF16879	SIN3-like 3
Glyma.13G162400	27	0.00986462
Glyma.15G039800	27	0.0109387	PF00650	SEC14 cytosolic factor family protein / phosphoglyceride transfer family protein
Glyma.19G217900	27	0.0109387	PF00397,PF00076	RNA binding;abscisic acid binding
Glyma.19G089100	27	0.0123543	PF00485,PF14681	uridine kinase/uracil phosphoribosyltransferase 1
Glyma.09G126500	27	0.0124448	PF03595	SLAC1 homologue 3
Glyma.10G165100	27	0.0132322
Glyma.20G126100	27	0.0147809	PF04676,PF04677	CwfJ-like family protein
Glyma.03G099900	27	0.0154946	PF06219	Protein of unknown function (DUF1005)
Glyma.11G250300	27	0.0161285	PF03031	SCP1-like small phosphatase 5
Glyma.19G040800	27	0.0239946	PF04046	Proline-rich spliceosome-associated (PSP) family protein / zinc knuckle (CCHC-type) family protein
Glyma.12G209800	27	0.0239946	PF07933	Adaptin ear-binding coat-associated protein 1 NECAP-1
Glyma.14G163000	27	0.0305689	PF00773	Ribonuclease II/R family protein
Glyma.13G331300	27	0.0375146	PF11721	hercules receptor kinase 1
Glyma.12G028900	27	0.0375146		RING/U-box superfamily protein
Glyma.04G247700	27	0.0452299	PF00490	Aldolase superfamily protein
Glyma.08G329200	26.9524	0.000203495	PF08766	DEK domain-containing chromatin associated protein
Glyma.15G129500	26.8333	0.0014307	PF00933,PF01915	Glycosyl hydrolase family protein
Glyma.03G211400	26.8333	0.00212089	PF10557,PF00888	cullin 1
Glyma.09G095700	26.8125	0.000148248	PF03789,PF03790,PF05920,PF03791	KNOTTED1-like homeobox gene 3
Glyma.17G129200	26.8	0.00591056	PF05496,PF00498	AAA-type ATPase family protein
Glyma.18G276300	26.75	0.000977628	PF00498	SMAD/FHA domain-containing protein
Glyma.13G240200	26.7333	0.0118383	PF08590	silencing defective 5
Glyma.05G081900	26.7143	0.0139776	PF00069	sucrose nonfermenting 1(SNF1)-related protein kinase 2.3
Glyma.U026800	26.6667	0.00289708	PF07724,PF06480,PF01434	FTSH protease 9
Glyma.19G051500	26.6667	0.00723979	PF13920,PF07002	RING domain ligase1
Glyma.06G098800	26.6667	0.0135947		Target SNARE coiled-coil domain protein
Glyma.06G098900	26.6667	0.0377652	PF14531	phosphoenolpyruvate carboxylase-related kinase 2
Glyma.10G198700	26.6429	0.0114647		Myosin heavy chain-related protein
Glyma.20G190500	26.5714	0.00027539	PF00534	UDP-Glycosyltransferase superfamily protein
Glyma.15G177700	26.5	0.00641444	PF14802	FRIGIDA interacting protein 1
Glyma.08G053400	26.5	0.00759246	PF00025	RAB GTPase homolog A6A
Glyma.11G167200	26.5	0.0163643	PF07719,PF13414	tetratricopeptide repeat (TPR)-containing protein
Glyma.15G013100	26.5	0.0221462	PF00533	BRCT domain-containing DNA repair protein
Glyma.07G251400	26.5	0.0357338	PF12937
Glyma.19G145300	26.4167	0.000702549	PF00170,PF14144	bZIP transcription factor family protein
Glyma.13G311800	26.3333	0.000442905	PF02485	Core-2/I-branching beta-1,6-N-acetylglucosaminyltransferase family protein
Glyma.16G038400	26.3333	0.00139116	PF02854,PF02847	MIF4G domain-containing protein / MA3 domain-containing protein
Glyma.03G000600	26.3333	0.0241216	PF00763,PF02882	Amino acid dehydrogenase family protein
Glyma.15G039500	26.3333	0.0269681	PF03715	Noc2p family
Glyma.03G164700	26.2	0.0290085	PF00069	casein kinase I-like 6
Glyma.15G205600	26.1667	0.00771176	PF05182	homolog of yeast FIP1 [V]
Glyma.05G106000	26.125	0.00182889	PF00249,PF00538	Homeodomain-like/winged-helix DNA-binding family protein
Glyma.20G187200	26.0426	0.000203397	PF07714,PF00069	Protein kinase superfamily protein
Glyma.10G032800	26	0.00310997	PF05486	Signal recognition particle, SRP9/SRP14 subunit
Glyma.18G146700	26	0.00621772		kinesin like protein for actin based chloroplast movement 1
Glyma.07G045600	26	0.00663873	PF01363,PF00118,PF01504	phosphatidylinositol-4-phosphate 5-kinase family protein
Glyma.07G169400	26	0.0108292
Glyma.12G241900	26	0.0108292	PF00069	Protein kinase family protein with ARM repeat domain
Glyma.02G310000	26	0.018011	PF12906	RING/U-box superfamily protein
Glyma.20G165800	26	0.033444	PF07714	ACT-like protein tyrosine kinase family protein
Glyma.09G243900	25.9167	0.00572625	PF04727	ELMO/CED-12 family protein
Glyma.07G019100	25.8571	0.00339007	PF13193,PF00501	AMP-dependent synthetase and ligase family protein
Glyma.17G120500	25.8333	0.0079884	PF00226,PF14237	DNAJ heat shock N-terminal domain-containing protein
Glyma.17G001700	25.7778	0.000609453	PF05557	mitotic checkpoint family protein
Glyma.20G181600	25.6667	0.00474196	PF00806,PF07990	pumilio 4
Glyma.19G056500	25.6667	0.0061264	PF04724	beta-1,4-N-acetylglucosaminyltransferase family protein
Glyma.06G173500	25.6562	0.0034439	PF14288,PF02364	glucan synthase-like 8
Glyma.19G184100	25.6441	0.000197226	PF00403	Heavy metal transport/detoxification superfamily protein
Glyma.10G161000	25.6333	0.0054695	PF03096	N-MYC downregulated-like 1
Glyma.01G169100	25.6	0.000752331	PF05277	Protein of unknown function (DUF726)
Glyma.04G163600	25.5714	0.0210069
Glyma.05G180100	25.5333	0.0151341	PF00441,PF02770,PF01756	acyl-CoA oxidase 2
Glyma.06G276400	25.503	0.000540512	PF07847	Protein of unknown function (DUF1637)
Glyma.13G290400	25.5	0.000468129	PF14381,PF07714	Mitogen activated protein kinase kinase kinase-related
Glyma.10G173300	25.5	0.00337013	PF14555,PF00789	UBX domain-containing protein
Glyma.09G266600	25.5	0.00670984	PF17047,PF00168	Calcium-dependent lipid-binding (CaLB domain) family protein
Glyma.18G015100	25.5	0.00717386	PF04791	LMBR1-like membrane protein
Glyma.10G213600	25.5	0.00717386	PF13041	Pentatricopeptide repeat (PPR) superfamily protein
Glyma.12G016700	25.5	0.0100248
Glyma.01G008900	25.5	0.0130886		golgin candidate 1
Glyma.07G056000	25.5	0.0181546	PF13831,PF00628,PF13771,PF00855,PF00856	SET domain protein 14
Glyma.17G236700	25.4286	0.00620605	PF00887	acyl-CoA-binding domain 3
Glyma.09G091200	25.4	0.0163126	PF00564,PF13414	Octicosapeptide/Phox/Bem1p (PB1) domain-containing protein / tetratricopeptide repeat (TPR)-containing protein
Glyma.10G092100	25.3571	0.0110526	PF00170,PF14144	bZIP transcription factor family protein
Glyma.08G326000	25.3333	0.000496107	PF00076,PF12872	CCCH-type zinc fingerfamily protein with RNA-binding domain
Glyma.06G013800	25.3333	0.00182756	PF00454,PF00613	Phosphatidylinositol 3- and 4-kinase family protein
Glyma.13G340700	25.3333	0.00933276	PF01103	outer envelope protein of 80 kDa
Glyma.11G109900	25.3333	0.0156185	PF12537,PF12430	GPCR-type G protein 2
Glyma.01G048500	25.2692	0.00715815	PF01762,PF00337	galactosyltransferase1
Glyma.04G061800	25.25	0.000882665
Glyma.12G225000	25.25	0.00597657	PF00297	ribosomal protein L3 plastid
Glyma.15G053600	25.2	0.000563322	PF01833,PF00612,PF12796,PF03859	Calmodulin-binding transcription activator protein with CG-1 and Ankyrin domains
Glyma.08G130900	25.2	0.0128981
Glyma.14G007700	25.1818	0.00571945	PF02518,PF00183	HEAT SHOCK PROTEIN 89.1
Glyma.09G059300	25.1667	0.00379586
Glyma.06G189600	25.0385	8.41522e-05	PF13499,PF07714	calcium-dependent protein kinase 1
Glyma.14G206200	25	0.00189469	PF08263,PF13855,PF00069	Leucine-rich repeat protein kinase family protein
Glyma.15G000300	25	0.00297235	PF00628,PF00569,PF02135,PF08214	histone acetyltransferase of the CBP family 12
Glyma.11G107500	25	0.00325087	PF00632	HEAT repeat ;HECT-domain (ubiquitin-transferase)
Glyma.15G194600	25	0.00379003	PF00083	inositol transporter 2
Glyma.03G185200	25	0.00456262	PF01603	Protein phosphatase 2A regulatory B subunit family protein
Glyma.06G082300	25	0.00713685	PF00249	Homeodomain-like protein
Glyma.12G031100	25	0.00945835
Glyma.09G135800	25	0.0117928	PF00106	NAD(P)-binding Rossmann-fold superfamily protein
Glyma.15G019600	25	0.0119422	PF12460,PF14500	ARM repeat superfamily protein
Glyma.13G160000	25	0.0119422	PF05699,PF14372	BED zinc finger ;hAT family dimerisation domain
Glyma.06G018800	25	0.0126043		Transducin/WD40 repeat-like superfamily protein
Glyma.07G213000	25	0.0144751		cold regulated gene 27
Glyma.17G067500	25	0.0144751	PF01980
Glyma.16G037100	25	0.0144751	PF02163	Peptidase M50 family protein
Glyma.19G242400	25	0.0162025	PF00098,PF03159	exoribonuclease 4
Glyma.18G135800	25	0.0191256	PF01436	NHL domain-containing protein
Glyma.19G007900	25	0.0191256
Glyma.14G203800	25	0.0459098		PAP/OAS1 substrate-binding domain superfamily
Glyma.05G035700	25	0.0460228	PF00179	ubiquitin-conjugating enzyme 5
Glyma.14G214800	24.8696	0.015014	PF00011	HSP20-like chaperones superfamily protein
Glyma.15G043500	24.8333	0.00165632
Glyma.11G237000	24.76	0.00274289	PF13561	NAD(P)-binding Rossmann-fold superfamily protein
Glyma.08G332000	24.75	0.000631567	PF17125,PF01189	S-adenosyl-L-methionine-dependent methyltransferases superfamily protein
Glyma.09G281200	24.75	0.00308531	PF00153	Mitochondrial substrate carrier family protein
Glyma.14G219700	24.75	0.00630007	PF02518,PF00183	Chaperone protein htpG family protein
Glyma.02G118500	24.75	0.00778209	PF16135,PF07897,PF16136	ABI five binding protein 3
Glyma.19G215100	24.7143	0.00155782	PF01556,PF00226	DNAJ heat shock family protein
Glyma.08G026700	24.6667	0.00193562	PF14604	SH3 domain-containing protein
Glyma.02G150400	24.6667	0.00639421	PF13920	RING/U-box superfamily protein
Glyma.12G191700	24.6602	0.00107042	PF03552	cellulose synthase-like B3
Glyma.15G025400	24.5333	0.00632277	PF13178,PF00612	IQ-domain 8
Glyma.10G276900	24.5	0.00103687	PF03439	kow domain-containing transcription factor 1
Glyma.19G135300	24.5	0.00253048	PF00226,PF13414	Heat shock protein DnaJ with tetratricopeptide repeat
Glyma.03G171800	24.5	0.0109595	PF01412	ARF-GAP domain 7
Glyma.12G076100	24.5	0.0160688	PF04499	SIT4 phosphatase-associated family protein
Glyma.06G145200	24.406	0.012486	PF00854	Major facilitator superfamily protein
Glyma.07G012000	24.3333	0.00186822		Protein phosphatase 2A, regulatory subunit PR55
Glyma.17G240800	24.3333	0.00458275		RING/U-box superfamily protein
Glyma.09G273900	24.3333	0.0215351	PF00122,PF12710,PF16209,PF16212	aminophospholipid ATPase 1
Glyma.07G246800	24.25	0.00354793	PF00225	P-loop containing nucleoside triphosphate hydrolases superfamily protein
Glyma.03G113600	24.25	0.00450675	PF03547	Auxin efflux carrier family protein
Glyma.05G037400	24.25	0.00991905	PF04695	peroxin 14
Glyma.04G000600	24.2105	0.00151583	PF00564,PF02042	Plant regulator RWP-RK family protein
Glyma.05G066800	24.1429	0.000885387	PF13833,PF13499	calcineurin B-like protein 9
Glyma.09G002100	24.1429	0.00233058	PF01926,PF02212,PF00169,PF01031	dynamin-like 3
Glyma.08G356200	24.0857	0.000270987
Glyma.05G117000	24	0.000728067	PF01833,PF00612,PF03859	Calmodulin-binding transcription activator protein with CG-1 and Ankyrin domains
Glyma.15G212200	24	0.00164301
Glyma.06G142300	24	0.00402327	PF00072	response regulator 17
Glyma.10G149700	24	0.00478318	PF00436	mitochondrially targeted single-stranded DNA binding protein
Glyma.03G220500	24	0.00743303	PF00069	Protein kinase superfamily protein
Glyma.13G210800	24	0.00746647	PF03951,PF00120	glutamine synthetase 2
Glyma.06G173400	24	0.0108525		glucan synthase-like 8
Glyma.18G037900	24	0.0143546		TRF-like 9
Glyma.14G169700	24	0.0178152	PF00916	sulfate transporter 1;3
Glyma.13G312300	24	0.0250024	PF07646,PF13418,PF00149	BRI1 suppressor 1 (BSU1)-like 2
Glyma.05G129300	24	0.0414286	PF06454
Glyma.08G179400	24	0.0436554		dentin sialophosphoprotein-related
Glyma.13G181700	23.8333	0.0113562	PF03031,PF00035	C-terminal domain phosphatase-like 1
Glyma.08G060200	23.75	0.000933405	PF02373,PF08879	Zinc finger, RING-type;Transcription factor jumonji/aspartyl beta-hydroxylase
Glyma.02G090200	23.6923	0.0147819	PF12874
Glyma.06G127600	23.6667	0.0017885
Glyma.06G081600	23.6667	0.00282632	PF12717,PF09066	adaptin family protein
Glyma.19G160800	23.6667	0.0222036	PF00290	Aldolase-type TIM barrel family protein
Glyma.04G019700	23.6667	0.0235453	PF00326,PF02897	Prolyl oligopeptidase family protein
Glyma.02G045200	23.625	0.000926	PF08159
Glyma.19G167500	23.6	0.00444839	PF00249,PF14379	phosphate starvation response 1
Glyma.05G066300	23.5833	0.000555969
Glyma.18G300200	23.5714	0.0115645	PF04652,PF14288,PF02364	glucan synthase-like 12
Glyma.11G194600	23.5	0.00250826	PF00403	Heavy metal transport/detoxification superfamily protein
Glyma.12G028800	23.5	0.00779775	PF00076,PF00641	TBP-associated factor 15
Glyma.10G099200	23.5	0.00902206	PF02209,PF00626	villin 2
Glyma.09G215100	23.5	0.0096891	PF10409,PF02181	actin binding
Glyma.17G096000	23.5	0.0096891	PF13499,PF07714	calcium-dependent protein kinase 30
Glyma.15G118900	23.5	0.0275517	PF00293	nudix hydrolase homolog 2
Glyma.09G211400	23.4857	9.34436e-05	PF00249,PF14379	Homeodomain-like superfamily protein
Glyma.17G038500	23.4	0.00685949	PF03810	ARM repeat superfamily protein
Glyma.08G217500	23.3333	0.00491237	PF03470,PF03468,PF03469	XH/XS domain-containing protein
Glyma.15G214700	23.3333	0.0456425	PF13920,PF01753	Ca(2)-dependent phospholipid-binding protein (Copine) family
Glyma.08G329100	23.3226	0.000122931	PF08766	DEK domain-containing chromatin associated protein
Glyma.08G054300	23.2727	0.00493899	PF07719,PF13414,PF01425	translocon at the outer membrane of chloroplasts 64-III
Glyma.17G167900	23.25	0.00358428	PF00929	small RNA degrading nuclease 3
Glyma.05G058500	23.25	0.0142357	PF04438	P-loop containing nucleoside triphosphate hydrolases superfamily protein
Glyma.07G180000	23.25	0.0421609
Glyma.19G175900	23.1818	0.0191047	PF00690,PF00702,PF00689,PF00122	endomembrane-type CA-ATPase 4
Glyma.17G109700	23.1667	0.00258342	PF00862,PF05116,PF00534	sucrose phosphate synthase 1F
Glyma.13G264100	23.1667	0.00335774	PF04096	Nucleoporin autopeptidase
Glyma.18G001900	23.125	0.00376002
Glyma.12G223300	23.0714	0.000167305
Glyma.01G056800	23.0204	0.0040088	PF03106	WRKY DNA-binding protein 57
Glyma.19G027500	23	0.000879937	PF07839	Plant calmodulin-binding protein-related
Glyma.09G116200	23	0.00181162	PF00646,PF03478	F-box family protein with a domain of unknown function (DUF295)
Glyma.01G019900	23	0.00218753
Glyma.12G078500	23	0.00377303	PF13207	P-loop containing nucleoside triphosphate hydrolases superfamily protein
Glyma.07G173100	23	0.00540995	PF08263,PF00069	transmembrane kinase 1
Glyma.19G218200	23	0.00834475	PF00270,PF00271,PF07717,PF04408	RNA helicase family protein
Glyma.17G009700	23	0.00834475	PF13371,PF00564	Octicosapeptide/Phox/Bem1p (PB1) domain-containing protein / tetratricopeptide repeat (TPR)-containing protein
Glyma.15G024700	23	0.0093227	PF00956	nucleosome assembly protein 1;2
Glyma.11G067600	23	0.0093227
Glyma.02G294900	23	0.0147426	PF05698,PF05697	trigger factor type chaperone family protein
Glyma.20G061800	23	0.0147426
Glyma.09G024700	23	0.017111	PF11721,PF07714	hercules receptor kinase 2
Glyma.03G103900	23	0.0202206	PF10366,PF00780,PF00637,PF10367	Vacuolar sorting protein 39
Glyma.18G070400	23	0.0230316	PF00514	ARM repeat superfamily protein
Glyma.20G109000	23	0.0275312	PF00626,PF04810,PF04815,PF08033,PF04811	Sec23/Sec24 protein transport family protein
Glyma.09G276900	23	0.0280286	PF00352	TATA binding protein 2
Glyma.13G292200	23	0.0280286	PF00439,PF17035	global transcription factor group E4
Glyma.11G077500	23	0.0364535	PF00514	armadillo repeat only 2
Glyma.04G084400	23	0.0367873	PF00415	Regulator of chromosome condensation (RCC1) family protein
Glyma.07G213200	23	0.0367873	PF01965	Class I glutamine amidotransferase-like superfamily protein
Glyma.19G180600	23	0.0464057	PF13371,PF13414,PF00226	homolog of mamallian P58IPK
Glyma.11G238500	22.9369	0.00285199	PF01740,PF00916	slufate transporter 2;1
Glyma.18G014100	22.9286	0.000206385	PF04724	beta-1,4-N-acetylglucosaminyltransferase family protein
Glyma.11G203900	22.8974	0.000245111	PF04970	NC domain-containing protein-related
Glyma.02G230100	22.75	0.00516685	PF07767
Glyma.20G161800	22.75	0.0180825	PF05063	Methyltransferase MT-A70 family protein
Plant-U3.8	22.7059	0.00940742		snoRNA
Glyma.10G095200	22.6667	0.000955709	PF05000,PF04983,PF04997,PF00623,PF04998	nuclear RNA polymerase A1
Glyma.07G101400	22.6667	0.00505657	PF00025	RAB GTPase homolog A6B
Glyma.02G251700	22.5	0.00118389	PF08662,PF00400,PF04158	nucleotide binding;protein binding
Glyma.03G058100	22.5	0.00717574	PF04791	LMBR1-like membrane protein
Glyma.15G126000	22.5	0.00912104	PF06972	Kinase-related protein of unknown function (DUF1296)
Glyma.16G131600	22.5	0.018026	PF00498,PF13325	Forkhead-associated (FHA) domain-containing protein
Glyma.05G160000	22.5	0.0439441	PF13632,PF00400,PF14569	cellulose synthase family protein
Glyma.19G125800	22.5	0.0462647	PF00686,PF02446	disproportionating enzyme 2
Glyma.19G254900	22.4615	0.00130436	PF00035,PF02170,PF00636	dicer-like 2
Glyma.16G020100	22.4286	0.0482287	PF04030,PF01565	D-arabinono-1,4-lactone oxidase family protein
Glyma.12G202600	22.4118	0.000161275	PF05623	Protein of unknown function (DUF789)
Glyma.09G109000	22.4	0.00569678
Glyma.06G000400	22.3913	6.72056e-05	PF02042	Plant regulator RWP-RK family protein
Glyma.13G183600	22.3913	0.00239041	PF01397,PF03936	terpene synthase 04
Glyma.16G089300	22.3333	0.00192058	PF01227	GTP cyclohydrolase I
Glyma.05G017900	22.3333	0.0195952	PF10250	O-fucosyltransferase family protein
Glyma.06G117400	22.25	0.00227001	PF08729	wound-responsive family protein
Glyma.14G002900	22.25	0.00545053	PF01467	phosphorylcholine cytidylyltransferase
Glyma.04G067800	22.2424	0.000704599	PF00153	Mitochondrial substrate carrier family protein
Glyma.15G005500	22.2	0.00151907	PF16987
Glyma.09G210300	22.2	0.00805239		protein dimerizations
Glyma.01G013600	22.1667	0.00206553	PF00170,PF07777,PF16596	basic region/leucine zipper transcription factor 16
Glyma.06G082000	22.1515	0.00117072	PF01925	Sulfite exporter TauE/SafE family protein
Glyma.03G236900	22.1429	0.0023847	PF00571,PF16561	homolog of yeast sucrose nonfermenting 4
Glyma.18G280300	22.1316	0.00231248	PF13855,PF02902,PF00931	Cysteine proteinases superfamily protein
Glyma.13G036600	22	0.00280666	PF13516,PF12937	RNI-like superfamily protein
Glyma.12G072000	22	0.00461784	PF03195	LOB domain-containing protein 1
Glyma.06G082800	22	0.00825281	PF03127,PF00790	ENTH/VHS/GAT family protein
Glyma.06G041700	22	0.0123655	PF00658,PF00076	poly(A) binding protein 8
Glyma.02G082600	22	0.0157435	PF12874	zinc ion binding
Glyma.02G305000	22	0.0170066	PF00226,PF11926	DNAJ heat shock N-terminal domain-containing protein
Glyma.12G104300	22	0.0170066	PF00232	beta glucosidase 17
Glyma.U007600	22	0.0170066		Uncharacterized protein
Glyma.17G063800	22	0.0214726	PF00856	SET domain-containing protein
Glyma.12G191000	22	0.0214726	PF12711,PF00225	P-loop containing nucleoside triphosphate hydrolases superfamily protein
Glyma.17G059700	22	0.0320147	PF00566	Ypt/Rab-GAP domain of gyp1p superfamily protein
Glyma.16G156300	22	0.0320147	PF01367,PF02739	5'-3' exonuclease family protein
Glyma.02G087500	22	0.0413547	PF00855	Tudor/PWWP/MBT superfamily protein
Glyma.06G296900	21.9069	0.000382579	PF04144	secretory carrier 3
Glyma.08G330600	21.8082	0.00695545	PF03552	cellulose synthase like E1
Glyma.12G055000	21.8	0.002236	PF08007	2-oxoglutarate (2OG) and Fe(II)-dependent oxygenase superfamily protein
Glyma.09G257900	21.8	0.0110821	PF04851,PF08880,PF00271	transcription regulatory protein SNF2, putative
Glyma.17G048900	21.7179	0.00749841	PF07714	Protein kinase superfamily protein
Glyma.06G156600	21.6667	0.00204049	PF01490	amino acid permease 2
Glyma.08G133900	21.6667	0.0104347	PF00076	RNA-binding (RRM/RBD/RNP motifs) family protein
Glyma.04G204600	21.6667	0.0164718
Glyma.18G068600	21.6667	0.0216478
Glyma.20G021900	21.6364	0.00213299	PF03367	ZPR1 zinc-finger domain protein
Glyma.13G155700	21.6289	6.61093e-05	PF00149	Calcineurin-like metallo-phosphoesterase superfamily protein
Glyma.18G249600	21.625	0.0077071	PF04727	ELMO/CED-12 family protein
Glyma.08G306600	21.6154	0.000166795
Glyma.14G098100	21.5806	0.00346152	PF02431	Chalcone-flavanone isomerase family protein
Glyma.04G026200	21.5625	0.0182573	PF00170	Basic-leucine zipper (bZIP) transcription factor family protein
Glyma.11G255200	21.5333	0.000366155
Glyma.12G230800	21.5	0.0071614	PF04859	Plant protein of unknown function (DUF641)
Glyma.01G010100	21.5	0.00921886	PF14703,PF13967,PF02714	early-responsive to dehydration stress protein (ERD4)
Glyma.12G057800	21.5	0.020334	PF06858,PF08155	Nucleolar GTP-binding protein
Glyma.17G031700	21.5	0.0279205	PF08969,PF01398	associated molecule with the SH3 domain of STAM 3
Glyma.08G050200	21.5	0.0386321	PF00270,PF00035,PF00271,PF07717,PF04408	DEA(D/H)-box RNA helicase family protein
Glyma.02G132700	21.4914	7.37965e-06	PF08553	Vacuolar import/degradation, Vid27-related protein
Glyma.20G238800	21.4667	0.000639707	PF13639,PF00628	RING/U-box protein
Glyma.15G121300	21.4545	0.0200083	PF13242,PF13344	2-phosphoglycolate phosphatase 2
Glyma.06G192600	21.3846	0.000971169	PF03271	end binding protein 1B
Glyma.17G234900	21.375	0.000329722	PF15811
Glyma.02G229400	21.3409	0.000366576	PF07719,PF13414	tetratricopeptide repeat (TPR)-containing protein
Glyma.05G080500	21.3333	0.00597215	PF00300	Phosphoglycerate mutase family protein
Glyma.20G178100	21.3333	0.00940303	PF09728
Glyma.08G337400	21.3333	0.0114171	PF16529,PF15011	Transducin/WD40 repeat-like superfamily protein
Glyma.11G118000	21.3333	0.0229576		Erythronate-4-phosphate dehydrogenase family protein
Glyma.14G026900	21.3333	0.0349015
Glyma.19G112600	21.3	0.00138714	PF07797	Protein of unknown function (DUF1639)
Glyma.07G093800	21.2941	0.00687431	PF02485	Core-2/I-branching beta-1,6-N-acetylglucosaminyltransferase family protein
Glyma.07G184700	21.25	0.00517349	PF03807,PF00745,PF05201	Glutamyl-tRNA reductase family protein
Glyma.13G354300	21.25	0.0337383	PF13812,PF01535,PF13041	Pentatricopeptide repeat (PPR) superfamily protein
Glyma.12G236300	21.2	0.00199231	PF00076	RNA-binding (RRM/RBD/RNP motifs) family protein
Glyma.06G209000	21.1818	0.000175105	PF00808	nuclear factor Y, subunit B13
Glyma.10G245700	21.1667	0.000880713	PF03914,PF07540	binding
Glyma.17G228900	21.1667	0.0103827
Glyma.09G267800	21.1429	0.0113886		zinc finger protein-related
Glyma.15G194900	21.125	0.0171981	PF04137	endoplasmic reticulum oxidoreductins 2
Glyma.08G201000	21.0909	0.000837607	PF03985	hydroxyproline-rich glycoprotein family protein
Glyma.01G108000	21	0.00823209	PF14360	Arabidopsis Inositol phosphorylceramide synthase 1
Glyma.19G113700	21	0.0112134	PF12796,PF00415	ankyrin repeat family protein / regulator of chromosome condensation (RCC1) family protein
Glyma.03G256800	21	0.0137165	PF00704	Glycosyl hydrolase superfamily protein
Glyma.13G197400	21	0.0138424	PF01535,PF13041	Tetratricopeptide repeat (TPR)-like superfamily protein
Glyma.05G202900	21	0.0171057	PF13589	Histidine kinase-, DNA gyrase B-, and HSP90-like ATPase family protein
Glyma.05G197300	21	0.0171057	PF15613,PF02791,PF15614,PF10537	DDT domain-containing protein
Glyma.08G318500	21	0.0175617	PF14780
Glyma.03G255600	21	0.0175617	PF00153	Mitochondrial substrate carrier family protein
Glyma.03G015600	21	0.0175617	PF02881,PF00448	signal recognition particle receptor protein, chloroplast (FTSY)
Glyma.12G135400	21	0.0182428	PF13041	Pentatricopeptide repeat (PPR) superfamily protein
Glyma.15G172300	21	0.0206268	PF00433,PF07714,PF00069	AGC (cAMP-dependent, cGMP-dependent and protein kinase C) kinase family protein
Glyma.10G134600	21	0.0206268	PF00238	Ribosomal protein L14p/L23e family protein
Glyma.09G213000	21	0.0206268
Glyma.03G226600	21	0.0206268	PF04851,PF00098,PF08152,PF00271	DEAD box RNA helicase (RH3)
Glyma.07G205500	21	0.0206268	PF00076	RNA-binding (RRM/RBD/RNP motifs) family protein
Glyma.10G283400	21	0.0259305	PF03810,PF02985,PF13513	transportin 1
Glyma.05G231700	21	0.0288431	PF07899	FRIGIDA-like protein
Glyma.18G296000	21	0.0357722
Glyma.19G016100	21	0.046605	PF01501	glucosyl transferase family 8
Glyma.14G131100	21	0.046605		DDB1-CUL4 associated factor 1
Glyma.08G330300	21	0.046605	PF04857	Polynucleotidyl transferase, ribonuclease H-like superfamily protein
Glyma.13G051400	21	0.0467231	PF10046
Glyma.01G036500	20.9474	0.00160085	PF00226	ARG1-like 1
Glyma.08G150900	20.8462	0.00125934	PF00931	NB-ARC domain-containing disease resistance protein
Glyma.08G152500	20.8333	0.000676871	PF00010	basic helix-loop-helix (bHLH) DNA-binding superfamily protein
Glyma.07G208300	20.8333	0.0300861	PF04000,PF09368	Sas10/U3 ribonucleoprotein (Utp) family protein
Glyma.19G136000	20.8	0.00359608	PF04851,PF00271,PF13892	INO80 ortholog
Glyma.11G090300	20.75	0.00427954	PF10197	zinc knuckle (CCHC-type) family protein
Glyma.10G209600	20.7143	0.00635753	PF02375,PF02373	Zinc finger (C2H2 type) family protein / transcription factor jumonji (jmj) family protein
Glyma.02G098300	20.6923	0.00344243	PF11265	phytochrome and flowering time regulatory protein (PFT1)
Glyma.18G049000	20.6905	8.31205e-06	PF01230	FRAGILE HISTIDINE TRIAD
Glyma.01G159200	20.6667	0.00685014	PF02042	RWP-RK domain-containing protein
Glyma.17G219900	20.6667	0.00928996	PF13041	Pentatricopeptide repeat (PPR) superfamily protein
Glyma.03G196700	20.6667	0.0333334	PF00076	RNA-binding (RRM/RBD/RNP motifs) family protein
Glyma.08G008400	20.6667	0.0469698	PF02151,PF07728,PF10431,PF00004,PF02861	CLPC homologue 1
Glyma.20G124700	20.6562	0.000329156	PF00085,PF04777	quiescin-sulfhydryl oxidase 1
Glyma.03G121000	20.6471	0.000719446	PF14641,PF14632,PF14639,PF14635,PF14878,PF14633	global transcription factor group B1
Glyma.07G037100	20.625	0.000793837	PF00249	TRF-like 6
Glyma.09G255200	20.5714	0.00453624	PF02826	NAD(P)-binding Rossmann-fold superfamily protein
Glyma.04G175300	20.5333	0.000501316	PF06293,PF13499	calcium-dependent protein kinase 1
Glyma.19G168000	20.5	0.00224526	PF01657	plasmodesmata-located protein 1
Glyma.11G039000	20.5	0.00331071	PF08652	glycine-rich protein
Glyma.06G156500	20.5	0.00444684		Chaperone DnaJ-domain superfamily protein
Glyma.04G039700	20.5	0.0101008	PF13639	RING/U-box superfamily protein
Glyma.17G135400	20.5	0.0101008	PF00078,PF01348	Intron maturase, type II family protein
Glyma.06G002400	20.5	0.0109667	PF04434,PF10551,PF03101	FAR1-related sequence 2
Glyma.04G004000	20.5	0.0129302	PF00632	HEAT repeat ;HECT-domain (ubiquitin-transferase)
Glyma.16G116600	20.5	0.0129302	PF14259	RNA-binding (RRM/RBD/RNP motifs) family protein
Glyma.18G291100	20.5	0.0165428	PF00535	Nucleotide-diphospho-sugar transferases superfamily protein
Glyma.18G202700	20.5	0.0165428	PF00957	transducin family protein / WD-40 repeat family protein
Glyma.19G028100	20.5	0.0327726	PF01501	galacturonosyltransferase 13
Glyma.02G271300	20.5	0.0327726	PF14703,PF13967,PF02714	ERD (early-responsive to dehydration stress) family protein
Glyma.19G139800	20.5	0.0492932	PF05193,PF00675,PF16187	Insulinase (Peptidase family M16) family protein
TFIIB1	20.4	0.00134181	PF00382	CYCLIN FAMILY PROTEIN-RELATED;transcription factor TFIIB
Glyma.10G192400	20.4	0.0128951	PF12215,PF04685	Beta-glucosidase, GBA2 type family protein
Glyma.19G085100	20.375	0.0278535	PF13964	Galactose oxidase/kelch repeat superfamily protein
Glyma.08G132700	20.3509	0.000237663	PF00925,PF00926	GTP cyclohydrolase II
Glyma.19G115700	20.3333	0.00641826	PF01042,PF01902	endoribonucleases
Glyma.08G196800	20.3333	0.00893066	PF07687,PF01546	peptidase M20/M25/M40 family protein
Glyma.13G131800	20.3333	0.00893066	PF16135	Acyl-CoA N-acyltransferase with RING/FYVE/PHD-type zinc finger domain
Glyma.05G125700	20.3333	0.0253283	PF03730,PF03731,PF08785,PF02735	Ku80 family protein
Glyma.14G028100	20.2857	0.000528569	PF06293	MAP kinase 20
Glyma.04G087800	20.25	0.00865859	PF06219	Protein of unknown function (DUF1005)
Glyma.03G075300	20.2308	0.00233017	PF13676,PF00931	Disease resistance protein (TIR-NBS-LRR class) family
Glyma.17G104800	20.2162	0.000356842	PF03789,PF03790,PF05920,PF03791	KNOTTED1-like homeobox gene 3
Glyma.16G019700	20.2143	0.000190949	PF00612,PF13178	IQ-domain 17
Glyma.16G155700	20.2	0.00315213	PF00070,PF02852	glutathione-disulfide reductase
Glyma.07G203600	20.2	0.00465711	PF05918	Apoptosis inhibitory protein 5 (API5)
Glyma.09G173400	20.1905	0.00452243	PF00293	nudix hydrolase homolog 4
Glyma.03G200800	20.1429	5.85416e-05	PF03641	Putative lysine decarboxylase family protein
Glyma.06G066800	20.1111	0.000984255
Glyma.08G170400	20	0.000247391	PF13920	SBP (S-ribonuclease binding protein) family protein
Glyma.17G151100	20	0.00245161	PF13541,PF02190,PF00004	lon protease 2
Glyma.15G140900	20	0.00267361	PF00171	aldehyde dehydrogenase 22A1
Glyma.06G103100	20	0.00745501	PF00481	Protein phosphatase 2C family protein
Glyma.17G061200	20	0.00890246	PF02209,PF00626	villin 4
Glyma.09G231800	20	0.0104852	PF00759	glycosyl hydrolase 9B1
Glyma.02G248700	20	0.0104852	PF00022	actin-related protein 5
Glyma.04G081100	20	0.0109355	PF03127,PF00790	ENTH/VHS/GAT family protein
Glyma.10G058300	20	0.0109355	PF01566	NRAMP metal ion transporter family protein
Glyma.08G233700	20	0.0124072	PF13872	RING/FYVE/PHD zinc finger superfamily protein
Glyma.16G118100	20	0.0153189	PF01255	Undecaprenyl pyrophosphate synthetase family protein
Glyma.19G229800	20	0.0171436	PF16186,PF01749,PF00514	importin alpha isoform 2
Glyma.18G118100	20	0.0205724	PF01494	FAD/NAD(P)-binding oxidoreductase family protein
Glyma.06G316400	20	0.0205724	PF11717,PF01853	histone acetyltransferase of the MYST family 1
Glyma.06G144900	20	0.0205724
Glyma.20G181300	20	0.0205724	PF01656	P-loop containing nucleoside triphosphate hydrolases superfamily protein
Glyma.03G166800	20	0.0205724	PF05033,PF00856,PF10440	SET-domain containing protein lysine methyltransferase family protein
Glyma.04G023600	20	0.0264844		Transcription elongation factor (TFIIS) family protein
Glyma.14G045500	20	0.0264844	PF00651	BTB-POZ and MATH domain 4
Glyma.13G356500	20	0.0264844
Glyma.05G115100	20	0.0407569	PF14259	RNA-binding (RRM/RBD/RNP motifs) family protein
Glyma.10G213200	20	0.0409552	PF13405,PF00153	mitochondrial substrate carrier family protein
Glyma.19G086600	20	0.0409552		ARM repeat superfamily protein
Glyma.02G144100	20	0.0409552	PF14432,PF01535,PF13041	Tetratricopeptide repeat (TPR)-like superfamily protein
Glyma.12G129300	20	0.0409552	PF00995
Glyma.13G232900	20	0.043548	PF00271,PF04408,PF07717	RNA helicase family protein
Glyma.13G110700	19.913	0.00846418	PF07714	Protein kinase superfamily protein
Glyma.10G165600	19.9	0.00277869
Glyma.06G178200	19.8	0.00153387	PF01426,PF00145,PF12047	methyltransferase 1
Glyma.12G230000	19.8	0.00307961	PF00646,PF01167	tubby like protein 7
Glyma.13G058400	19.7778	0.0172604	PF13881	membrane-anchored ubiquitin-fold protein 2
Glyma.10G058600	19.75	0.0265878	PF01842	ACT-like superfamily protein
Glyma.04G244100	19.7143	0.000442983	PF13947,PF00069	wall-associated kinase 2
Glyma.13G139200	19.7037	0.000211686	PF12906	RING/U-box superfamily protein
Glyma.04G248700	19.6667	0.00450297	PF14543	Eukaryotic aspartyl protease family protein
[truncated: 2,063 more rows]

## Sheet: DEG_FvsH
Gene ID	norm_fold Change	pvalue	PFAM annotation	Annotation
Glyma.18G274400	4099	0.00050314	PF00201	UDP-Glycosyltransferase superfamily protein
Glyma.12G052700	2957.5	0.00447986		ARM repeat superfamily protein
Glyma.04G057400	1944	0.00108755	PF02170,PF04851,PF00271,PF03368,PF00636	dicer-like 3
Glyma.14G148700	1583	0.00317016		P-loop containing nucleoside triphosphate hydrolases superfamily protein
Glyma.15G071600	1380	0.00172735	PF04046,PF04037	proline-rich spliceosome-associated (PSP) family protein
Glyma.06G127400	1307	0.00235496	PF14691,PF07992,PF01493,PF04898,PF01645,PF00310	NADH-dependent glutamate synthase 1
Glyma.01G186000	1232	0.00424621	PF09750
Glyma.14G130700	1177	0.000726356	PF13639,PF05495,PF14599	CHY-type/CTCHY-type/RING-type Zinc finger protein
Glyma.01G077200	1169	0.00201147	PF00867,PF00752	5'-3' exonuclease family protein
Glyma.02G033600	1131	0.00145771	PF02705	K+ uptake permease 6
Glyma.05G146400	1010.89	0.000198442	PF16923,PF03200	glucosidase 1
Glyma.13G353200	988	0.00131251		actin binding protein family
Glyma.14G143000	985	0.00211624	PF00790	ENTH/VHS/GAT family protein
Glyma.08G218200	975	0.00289207	PF01566	NRAMP metal ion transporter 6
Glyma.08G258500	918.667	0.00210185	PF13831,PF05965,PF05964,PF00856,PF00855,PF13771	trithorax-like protein 2
Glyma.20G241400	882	0.00196067
Glyma.07G128700	805.455	7.45e-07		effector of transcription2
Glyma.04G117400	796.5	0.0016715	PF01432	Zincin-like metalloproteases family protein
Glyma.05G076800	795	0.00269001		plastid transcriptionally active 9
Glyma.19G067100	724	0.000956685	PF03219	TLC ATP/ADP transporter
Glyma.11G029300	680	0.000576891
Glyma.01G031400	678	9.83e-05	PF00076,PF01480	splicing factor PWI domain-containing protein / RNA recognition motif (RRM)-containing protein
Glyma.14G142100	676	0.00281786	PF04258	signal peptide peptidase
Glyma.09G175800	643	0.0025686	PF01798,PF13041	NOP56-like pre RNA processing ribonucleoprotein
Glyma.16G085100	620.333	0.0020384	PF13414	carboxyl terminus of HSC70-interacting protein
Glyma.20G227200	608.5	0.00379344	PF04851,PF00271	P-loop containing nucleoside triphosphate hydrolases superfamily protein
Glyma.07G062900	606.5	8.03e-05	PF00931	NB-ARC domain-containing disease resistance protein
Glyma.09G083800	602	0.00312166	PF07928	VPS54
Glyma.13G330600	553.5	0.00377794	PF00225	P-loop containing nucleoside triphosphate hydrolases superfamily protein
Glyma.07G036300	545.143	0.00261477	PF14438,PF06741	CTC-interacting domain 4
Glyma.12G196000	543	0.00330975	PF03124	EXS (ERD1/XPR1/SYG1) family protein
Glyma.13G027800	534.333	0.000980733	PF00443,PF14533,PF12436	ubiquitin-specific protease 13
Glyma.20G054600	527	0.00338067	PF00443,PF14533,PF12436	ubiquitin-specific protease 13
Glyma.20G160900	522	0.00422784	PF04564,PF07714	U-box domain-containing protein kinase family protein
Glyma.20G086700	504	0.00238776	PF00917	TRAF-like superfamily protein
Glyma.07G207700	462	0.00185079	PF00168,PF02893,PF16016	C2 domain-containing protein / GRAM domain-containing protein
Glyma.08G162300	448.5	0.000693114	PF07926	nuclear pore anchor
Glyma.13G183900	439.5	0.000379423	PF13923,PF00271,PF00176	SNF2 domain-containing protein / helicase domain-containing protein / zinc finger protein-related
Glyma.01G187200	425.5	0.00186148		PLC-like phosphodiesterases superfamily protein
Glyma.10G047800	411	0.00108322	PF00566	Ypt/Rab-GAP domain of gyp1p superfamily protein
Glyma.11G237700	375	0.000457937	PF00136,PF03104,PF08490	DNA polymerase epsilon catalytic subunit
Glyma.02G310900	369	0.000525085	PF16414,PF02460	Patched family protein
Glyma.04G096300	365	0.00113935	PF06200,PF00320,PF06203	ZIM-like 1
Glyma.18G173600	361	0.00012305
Glyma.06G201700	361	0.00127448	PF00271,PF04408,PF07717	RNA helicase family protein
Glyma.06G003000	352.25	0.00429018		ARM repeat superfamily protein
Glyma.07G034600	352	0.00443754	PF09405	CASC3/Barentsz eIF4AIII binding
Glyma.15G049000	349	0.000224867	PF00170	Basic-leucine zipper (bZIP) transcription factor family protein
Glyma.05G215100	348.75	0.00293435	PF07765	myosin heavy chain-related
Glyma.16G144200	348	0.00415155	PF06650	Protein of unknown function (DUF1162)
Glyma.13G182600	343.333	0.00217234	PF04046,PF04037	proline-rich spliceosome-associated (PSP) family protein
Glyma.20G218800	341	0.000551168	PF14237,PF00076	RNA binding (RRM/RBD/RNP motifs) family protein
Glyma.09G112200	337	0.00319021	PF04851,PF07529,PF00271	SNF2 domain-containing protein / helicase domain-containing protein
Glyma.18G216100	332.333	0.000780665		Mitochondrial ATP synthase D chain-related protein
Glyma.19G065600	331.167	0.000819096	PF14691,PF07992,PF01493,PF04898,PF00310,PF01645	NADH-dependent glutamate synthase 1
Glyma.18G147700	331	0.00107593	PF00860	Xanthine/uracil permease family protein
Glyma.12G157700	331	0.00244576	PF00645,PF08645	phosphoesterase
Glyma.17G165900	327	0.000996045	PF08513,PF00400	WD-40 repeat family protein
Glyma.17G095800	326	0.00256099	PF00443,PF04781,PF04780	Ubiquitin carboxyl-terminal hydrolase-related protein
Glyma.01G121400	322	0.00451509	PF11935,PF12295	HEAT repeat-containing protein
Glyma.U029000	320	0.00169283	PF00397,PF01846	pre-mRNA-processing protein 40A
Glyma.07G233100	315.8	0.000847118	PF16909,PF06650,PF06101,PF12624,PF16910,PF16908	calcium-dependent lipid-binding family protein
Glyma.01G031800	310.889	0.00094876	PF02705	K+ uptake permease 6
Glyma.14G122200	309.75	0.0045353	PF00450	serine carboxypeptidase-like 42
Glyma.04G173000	301.778	0.00276638	PF00005,PF12698	ATP-binding cassette A2
Glyma.05G085400	297.6	0.00472699	PF00225	P-loop containing nucleoside triphosphate hydrolases superfamily protein
Glyma.06G001900	295	0.00364493	PF00318,PF01704	UDP-GLUCOSE PYROPHOSPHORYLASE 1
Glyma.14G129500	292	0.00296025		embryo defective 2410
Glyma.13G080100	285	0.00420375	PF16546,PF13414	Tetratricopeptide repeat (TPR)-like superfamily protein
Glyma.06G240500	283	0.0036816		proton pump interactor 1
Glyma.06G008300	282	0.00055885	PF02201,PF02213,PF03126	nucleic acid binding;zinc ion binding;DNA binding
Glyma.17G255500	282	0.0029903	PF13450,PF04433	LSD1-like 3
Glyma.17G050100	281.25	0.00350255	PF03456,PF02141	DENN (AEX-3) domain-containing protein
Glyma.13G109600	278.167	0.00187813	PF03456,PF02141	DENN (AEX-3) domain-containing protein
Glyma.08G237500	269.75	0.00155458	PF07724,PF01434	FTSH protease 12
Glyma.10G133700	269	0.00211875	PF00400,PF08606	MOS4-associated complex 3B
Glyma.17G060400	267	0.00143848	PF12710,PF00122	heavy metal atpase 2
Glyma.12G224600	264.333	0.00254871	PF00069,PF00400	SPA1-related 3
Glyma.05G042700	264	0.00173691	PF07714	FUS3-complementing gene 2
Glyma.06G070300	261	0.000459648	PF00160	Cyclophilin-like peptidyl-prolyl cis-trans isomerase family protein
Glyma.20G132900	257	0.00414081	PF13812,PF13041,PF14432	Tetratricopeptide repeat (TPR)-like superfamily protein
Glyma.17G197200	243	0.00350459
Glyma.07G113100	239.905	0.00421271	PF03547	Auxin efflux carrier family protein
Glyma.07G149900	236	0.00360503	PF04791	LMBR1-like membrane protein
Glyma.07G249800	234	0.00499187	PF06584	DNA binding
Glyma.06G092100	233	0.00238507	PF00300	Phosphoglycerate mutase family protein
Glyma.15G246800	232.667	6.52e-05	PF00931	NB-ARC domain-containing disease resistance protein
Glyma.01G099700	232.5	0.00481271	PF00156	uracil phosphoribosyltransferase
Glyma.17G072000	231.571	0.000745925	PF04484	Family of unknown function (DUF566)
Glyma.08G252600	229	0.00471181	PF00569,PF13764	auxin transport protein (BIG)
Glyma.07G218600	228.333	0.00131525	PF00485	P-loop containing nucleoside triphosphate hydrolases superfamily protein
Glyma.03G024000	227	0.00164647	PF00270,PF07717,PF00271,PF04408	RNA helicase family protein
Glyma.20G135800	223.8	0.00110951	PF00397,PF01846	pre-mRNA-processing protein 40B
Glyma.11G196900	221	0.00153202		ATP-dependent helicase family protein
Glyma.02G049800	218.444	0.00317505	PF00076	RNA-binding (RRM/RBD/RNP motifs) family protein
Glyma.18G099000	218	0.00226816	PF14438
Glyma.06G098300	215.667	0.00317617	PF10347,PF10351	Golgi-body localisation protein domain ;RNA pol II promoter Fmp27 protein domain
Glyma.14G152100	214	0.000267721	PF00171	aldehyde dehydrogenase 3H1
Glyma.02G060000	210.5	0.00124445	PF05920,PF07526	BEL1-like homeodomain 2
Glyma.16G074300	209	0.00286187	PF00069	Protein kinase superfamily protein
Glyma.08G281400	207	0.0020496	PF02893	GRAM domain family protein
Glyma.18G048900	205.231	0.00126114	PF16124,PF00570,PF14493,PF00271,PF00270,PF09382	RECQ helicase SIM
Glyma.08G253800	205	0.00267996	PF14700,PF00940	DNA/RNA polymerases superfamily protein
Glyma.10G118800	202.5	0.00483994	PF09733	VEFS-Box of polycomb protein
Glyma.06G032500	199.5	0.00341384	PF00342	Sugar isomerase (SIS) family protein
Glyma.05G185300	193.333	0.00476323	PF14649
Glyma.17G024800	189	0.00419529	PF07496	CW-type Zinc Finger
Glyma.18G137700	187.5	0.000609462	PF02902	UB-like protease 1D
Glyma.02G102700	183.533	0.00206747		PLC-like phosphodiesterases superfamily protein
Glyma.08G283100	183	0.00407716		anthranilate phosphoribosyltransferase, putative
Glyma.05G109300	182	0.000985615		little nuclei4
Glyma.15G048700	181.5	0.00340728	PF04696	protein-protein interaction regulator family protein
Glyma.19G121100	180	0.00447194	PF04818	ENTH/VHS family protein
Glyma.08G012000	178	0.00354081	PF01429	methyl-CPG-binding domain protein 13
Glyma.02G221600	177.5	0.00174591	PF05978	Major facilitator superfamily protein
Glyma.16G154400	175	0.00347235	PF01585,PF12457,PF07842	GC-rich sequence DNA-binding factor-like protein with Tuftelin interacting domain
Glyma.08G265300	174.5	0.00198145	PF04818,PF08312,PF00076,PF01805	RNA recognition motif (RRM)-containing protein
Glyma.13G030600	174.333	0.000421649	PF00225	P-loop containing nucleoside triphosphate hydrolases superfamily protein
Glyma.08G186200	174	0.00124486	PF15346
Glyma.13G319300	173	0.000929972	PF02493	MORN (Membrane Occupation and Recognition Nexus) repeat-containing protein
Glyma.09G000100	171.667	0.000263441	PF06978	ribonuclease Ps
Glyma.16G088700	170.5	0.00144629	PF00069	Protein kinase superfamily protein
Glyma.13G340300	170.286	0.0012743	PF00111,PF01799,PF03450,PF01315,PF00941,PF02738	xanthine dehydrogenase 1
Glyma.04G096100	170	0.000979051	PF13385,PF00400,PF16057,PF14844,PF15787,PF02138	binding
Glyma.12G237400	166.857	0.00171784	PF01554	MATE efflux family protein
Glyma.06G181000	166.667	0.000297568	PF13251	ARM repeat superfamily protein
Glyma.16G044400	163	0.000689885	PF08389	ARM repeat superfamily protein
Glyma.11G224400	162.804	0.00267398	PF00854	Major facilitator superfamily protein
Glyma.10G263700	162	0.000964247		PTEN 2
Glyma.20G121300	160.833	0.00314513	PF01569	lipid phosphate phosphatase 2
Glyma.02G163200	159.25	0.00157673	PF01061,PF00005	P-loop containing nucleoside triphosphate hydrolases superfamily protein
Glyma.17G188300	158.864	0.00116195	PF06176,PF03109,PF00144	ABC1 family protein
Glyma.11G011700	158	0.00231681	PF03810,PF08389,PF08767	exportin 1A
Glyma.07G084900	158	0.00416988	PF14309
Glyma.17G095900	155.8	0.000167525
Glyma.16G128000	155.5	0.00222332	PF01582,PF00931	disease resistance protein (TIR-NBS-LRR class), putative
Glyma.08G152600	155	0.00183767	PF01585,PF01805	SWAP (Suppressor-of-White-APricot)/surp domain-containing protein / D111/G-patch domain-containing protein
Glyma.07G020600	153.077	0.00131615	PF13883	Pyridoxamine 5'-phosphate oxidase family protein
Glyma.14G136600	152	0.000712799	PF01975	Survival protein SurE-like phosphatase/nucleotidase
Glyma.06G217700	152	0.00200242		nucleoporin-related
Glyma.09G198200	150.167	0.00361511		Transducin/WD40 repeat-like superfamily protein
Glyma.13G175200	150	0.00075623	PF15612,PF15613,PF15614,PF05066,PF00046,PF02791	homeobox-1
Glyma.10G188600	149	0.00169839	PF00917	TRAF-like superfamily protein
Glyma.20G114300	148.714	0.000494457	PF07714	Protein kinase superfamily protein
Glyma.19G130100	148.5	0.00158047	PF07058	microtubule-associated proteins 70-1
Glyma.14G126500	148.44	0.000111669	PF07885,PF00027,PF11834,PF12796	K+ transporter 1
Glyma.13G027100	148.333	0.00316745
Glyma.20G004000	146.333	0.00153118	PF00076	nucleolin like 2
Glyma.11G175700	146	0.00157013	PF13920	histone mono-ubiquitination 1
Glyma.11G160300	146	0.00342725	PF05193,PF00675,PF16187	Insulinase (Peptidase family M16) family protein
Glyma.02G044200	145.45	0.00490872	PF03171	2-oxoglutarate (2OG) and Fe(II)-dependent oxygenase superfamily protein
Glyma.10G275400	143.857	0.00279305	PF07714	Protein kinase superfamily protein
Glyma.09G261200	143.25	0.00214048	PF06398,PF00168	C2 calcium/lipid-binding plant phosphoribosyltransferase family protein
Glyma.09G228100	143	0.000542419	PF07227,PF16312	Protein of unknown function (DUF1423)
SSU-rRNA-eukarya.134	140	0.00197774		rRNA processing protein-related
Glyma.10G041700	140	0.00211013	PF02736,PF00612,PF01843,PF00063	myosin 2
Glyma.20G183400	138.5	0.00468783	PF12348	ARM repeat superfamily protein
Glyma.13G325000	138.4	0.00312607	PF00169,PF01852,PF07059	Pleckstrin homology (PH) and lipid-binding START domains-containing protein
Glyma.06G311100	136.857	0.000612097	PF00931	NB-ARC domain-containing disease resistance protein
Glyma.17G107500	135.143	0.00140967	PF12796,PF01529	Ankyrin repeat family protein with DHHC zinc finger domain
Glyma.03G149900	134.929	0.000176561		oxidoreductase, 2OG-Fe(II) oxygenase family protein
Glyma.13G024700	133.285	0.000181382	PF00682	2-isopropylmalate synthase 1
Glyma.08G206200	133	0.00333377
Glyma.08G178700	132.5	0.00146117	PF00515,PF13414,PF01425	translocon at the outer membrane of chloroplasts 64-V
Glyma.18G190400	132	0.00227929	PF00069	cyclin-dependent kinase B2;2
Glyma.11G039900	130.667	0.000556419	PF00169,PF06650,PF12624,PF06101,PF16910,PF16908	pleckstrin homology (PH) domain-containing protein
Glyma.01G061500	129.667	0.000546141	PF00069	Protein kinase superfamily protein
Glyma.14G064900	129	8.73e-05	PF00153	Mitochondrial substrate carrier family protein
Glyma.10G163700	128.111	0.000540965	PF13535,PF00731	phosphoribosylaminoimidazole carboxylase, putative / AIR carboxylase, putative
Glyma.07G223700	128	0.00385451	PF00134	Cyclin family protein
Glyma.16G219100	127.333	0.000156734	PF07714	Protein kinase superfamily protein
Glyma.02G115200	124.6	0.000418573	PF03106	WRKY DNA-binding protein 57
Glyma.08G055400	124.2	0.00118754		Outer arm dynein light chain 1 protein
Glyma.18G036300	124	0.000172641	PF02769,PF13507	purine biosynthesis 4
Glyma.02G149200	124	0.0022786	PF04818,PF00855	Tudor/PWWP/MBT domain-containing protein
Glyma.07G252100	124	0.00468468	PF04851,PF00271,PF14619	P-loop containing nucleoside triphosphate hydrolases superfamily protein
Glyma.15G236500	123	0.00172282	PF00400	Transducin/WD40 repeat-like superfamily protein
Glyma.12G042600	123	0.00172282	PF11861,PF01728,PF07780	FtsJ-like methyltransferase family protein
Glyma.13G007400	121	0.00178666	PF16719
Glyma.15G263400	121	0.00404707	PF03381	LEM3 (ligand-effect modulator 3) family protein / CDC50 family protein
Glyma.05G213300	120.25	0.00102862
Glyma.09G209900	120	0.000585416	PF00503	extra-large GTP-binding protein 3
Glyma.09G277700	120	0.000828536
Glyma.05G220300	118	0.000601096	PF14604	SH3 domain-containing protein
Glyma.02G073100	118	0.00257167	PF01585,PF12457,PF07842	GC-rich sequence DNA-binding factor-like protein with Tuftelin interacting domain
Glyma.05G209700	115.75	0.0036417	PF00271,PF04851,PF13625	homolog of xeroderma pigmentosum complementation group B 1
Glyma.07G208600	115.5	0.000576345	PF00787,PF08628,PF02194	Phox-associated domain;Phox-like;Sorting nexin, C-terminal
Glyma.07G224600	114.5	0.00270273	PF13015,PF12999	calmodulin-binding protein
Glyma.10G190500	114	0.00228969	PF01657	plasmodesmata-located protein 2
Glyma.18G149700	114	0.00426758	PF00201,PF03033	UDP-Glycosyltransferase superfamily protein
Glyma.08G305100	113.8	0.00257063	PF03798	TRAM, LAG1 and CLN8 (TLC) lipid-sensing domain containing protein
Glyma.09G273000	113.6	0.0017876		Mitochondrial ATP synthase D chain-related protein
Glyma.06G208900	111.5	0.000737432	PF00122,PF12710,PF16209,PF16212	ATPase E1-E2 type family protein / haloacid dehalogenase-like hydrolase family protein
Glyma.01G175100	111	0.00427565	PF00076,PF12220	U1 small nuclear ribonucleoprotein-70K
Glyma.13G305000	110	0.000723103	PF00856	SET domain protein 2
Glyma.15G154300	108	0.0039911	PF00571,PF16561	homolog of yeast sucrose nonfermenting 4
Glyma.12G050100	107.714	0.00322461	PF00564,PF02042	Plant regulator RWP-RK family protein
Glyma.14G218000	107	0.00263142	PF00098,PF03159	5'-3' exoribonuclease 3
Glyma.18G264600	106.5	0.000882844	PF13881	membrane-anchored ubiquitin-fold protein 2
Glyma.18G028700	105	0.00128635
Glyma.06G143500	105	0.00275554	PF13638,PF00773	ribonuclease II family protein
Glyma.10G172500	105	0.00473687		RING/FYVE/PHD zinc finger superfamily protein
Glyma.04G116700	104.5	0.00337665	PF07719,PF13414,PF00515	peroxin 5
Glyma.10G037300	104	0.000539074	PF02463,PF06470	Structural maintenance of chromosomes (SMC) family protein
Glyma.09G244700	103	0.00402413	PF01713,PF08590	smr (Small MutS Related) domain-containing protein
Glyma.10G030000	102.031	0.000208314	PF13385,PF00400,PF14844,PF02138	Beige/BEACH domain ;WD domain, G-beta repeat protein
Glyma.08G220400	101.2	4.91e-05
Glyma.13G003700	100.5	0.00130112	PF00012	heat shock protein 70 (Hsp 70) family protein
Glyma.12G070100	100	0.00070306	PF03914,PF07540	binding
Glyma.02G161900	100	0.00243496		hydroxyproline-rich glycoprotein family protein
Glyma.09G211000	100	0.00270048	PF14703,PF13967,PF02714	early-responsive to dehydration stress protein (ERD4)
Glyma.16G116200	100	0.00477675		Transducin/WD40 repeat-like superfamily protein
Glyma.02G168900	99.3333	0.00188539	PF05843,PF00575	RNA binding;RNA binding
Glyma.02G109900	99	0.000469957	PF14443	ATP/GTP-binding protein family
Glyma.11G100400	99	0.00123318	PF04818,PF00855	Tudor/PWWP/MBT domain-containing protein
Glyma.13G229600	99	0.00135476	PF13837	sequence-specific DNA binding transcription factors
Glyma.14G053300	99	0.00276786	PF00218	Aldolase-type TIM barrel family protein
Glyma.20G065900	98.5	0.00119019	PF00012	heat shock protein 70 (Hsp 70) family protein
Glyma.03G130000	98.2857	0.000310262	PF00072	response regulator 9
Glyma.07G163100	98	0.00160021
Glyma.16G010400	98	0.00180683	PF12090
Glyma.08G155000	98	0.00200065
Glyma.09G046800	97.5	0.00228081	PF00571,PF16561	homolog of yeast sucrose nonfermenting 4
Glyma.04G236600	96	0.000784083	PF00069,PF04755	OBP3-responsive gene 1
Glyma.19G153900	96	0.00143508	PF04818,PF00855	Tudor/PWWP/MBT domain-containing protein
Glyma.15G048400	95.5	9.98e-05	PF03470,PF03468	XS domain-containing protein / XS zinc finger domain-containing protein-related
Glyma.20G112800	95	5.94e-05	PF03439	kow domain-containing transcription factor 1
Glyma.19G132200	95	0.00241099	PF09713	Plant protein 1589 of unknown function
Glyma.07G070700	94.4	0.00056992	PF09497	RNA polymerase II transcription mediators
Glyma.12G242300	93.25	0.00122342	PF01926,PF02212,PF00169,PF01031	dynamin-like 3
Glyma.05G199200	92.6667	0.000300663	PF00262	calnexin 1
Glyma.06G175900	92	0.00474026	PF07714	FUS3-complementing gene 2
Glyma.08G356500	91.6667	0.00326761	PF00564,PF07714	Protein kinase superfamily protein with octicosapeptide/Phox/Bem1p domain
Glyma.07G147700	91.25	0.000402504	PF00646,PF01167	tubby like protein 1
Glyma.05G131500	91.2	0.00330282	PF06465,PF00628,PF04851,PF00385,PF00271	chromatin remodeling 4
Glyma.08G279800	91.1765	0.00289043	PF00225	kinesin like protein for actin based chloroplast movement 1
Glyma.13G123700	91	0.0020771	PF13476,PF06470	Structural maintenance of chromosomes (SMC) family protein
Glyma.20G238000	90.2857	0.00387537	PF00169,PF13091,PF00614	phospholipase D P1
Glyma.08G256300	90	0.0045773		little nuclei1
Glyma.14G183000	89	0.000540622	PF00627,PF14377,PF06012,PF06025,PF00632	ubiquitin-protein ligase 2
Glyma.11G077200	89	0.00279018		Chalcone-flavanone isomerase family protein
Glyma.18G217100	88.5	0.00243962	PF02535	ZIP metal ion transporter family
Glyma.13G024500	87.9136	0.000222499
Glyma.09G274600	87.2	0.000786625	PF08263,PF00560,PF13855,PF00069	Leucine-rich receptor-like protein kinase family protein
Glyma.01G010800	87	0.00163391		protein dimerizations
Glyma.10G270000	86.8	0.00271606	PF01569	lipid phosphate phosphatase 2
Glyma.13G027300	86.2222	0.000140233	PF14647,PF14648
Glyma.19G095700	86	0.00168691	PF02213	GYF domain-containing protein
Glyma.02G136800	86	0.00179101	PF00787,PF08628,PF02194	Phox-associated domain;Phox-like;Sorting nexin, C-terminal
Glyma.18G034000	86	0.00276438	PF00854	Major facilitator superfamily protein
Glyma.20G022400	85.9615	0.000219247	PF13920	SBP (S-ribonuclease binding protein) family protein
Glyma.11G203400	85.8333	0.000338383	PF03169	YELLOW STRIPE like 7
Glyma.16G026900	85.75	0.000625585	PF03321	Auxin-responsive GH3 family protein
Glyma.07G035600	85	0.000394473	PF07728	ATPases;nucleotide binding;ATP binding;nucleoside-triphosphatases;transcription factor binding
Glyma.06G068000	84.4286	0.00251641
Glyma.16G035100	84	0.00185756	PF04851,PF08880,PF00271	transcription regulatory protein SNF2, putative
Glyma.01G147800	83.75	0.00195894	PF01852,PF07059	ENHANCED DISEASE RESISTANCE 2
Glyma.12G226900	83.6667	0.00100822
Glyma.08G166300	83.5	0.00492576
Glyma.10G016400	83.0417	0.00374676	PF01280	Ribosomal protein L19e family protein
Glyma.09G283600	83	0.00400442	PF02375,PF02373	Transcription factor jumonji (jmj) family protein / zinc finger (C5HC2 type) family protein
Glyma.16G130000	82.25	0.00446525	PF00076	RNA-binding (RRM/RBD/RNP motifs) family protein
Glyma.05G102400	82	0.00321669	PF13371,PF00515,PF13414	Tetratricopeptide repeat (TPR)-like superfamily protein
Glyma.10G136700	81.8868	0.000590051	PF00646	F-box/RNI-like/FBD-like domains-containing protein
Glyma.07G144700	81.6667	0.00118829	PF00083	phosphate transporter 4;2
Glyma.01G031900	81.3333	0.00365808	PF02358,PF00982	trehalose-phosphatase/synthase 9
Glyma.03G188200	81	0.00202238	PF00076,PF14111
Glyma.17G092200	81	0.00206235	PF08711	BAH domain ;TFIIS helical bundle-like domain
Glyma.07G263300	80.5714	0.00322568	PF14703,PF13967,PF02714	ERD (early-responsive to dehydration stress) family protein
Glyma.09G192000	80.5	0.00179085	PF14309
Glyma.18G253900	80	0.00187914	PF08164,PF13339	rRNA processing protein-related
Glyma.12G120600	80	0.00223269	PF08477	RAC-like 3
Glyma.14G137100	79.75	0.00021456	PF01396,PF13368,PF01751,PF01131	DNA topoisomerase, type IA, core
Glyma.10G284400	79.1667	0.00157668	PF07714	ACT-like protein tyrosine kinase family protein
Glyma.09G136800	79	0.00180613
Glyma.07G118800	79	0.00467559	PF00022	actin-related protein 4
Glyma.07G223100	78.3333	0.000182187	PF13920	SBP (S-ribonuclease binding protein) family protein
Glyma.01G131400	78.3333	0.00145563	PF05184,PF03489	saposin B domain-containing protein
Glyma.18G233700	78	0.00208613	PF03931,PF01466	SKP1-like 21
Glyma.05G200800	77.5556	0.000164237	PF02309,PF02362,PF06507	auxin response factor 2
Glyma.16G032700	76.75	0.000365082	PF00069	Protein kinase superfamily protein
Glyma.14G044500	76.5	0.000918261	PF00917,PF13423,PF14533,PF12436	ubiquitin-specific protease 12
Glyma.15G166200	76.25	0.00189705	PF00046,PF00628	pathogenesis related homeodomain protein A
Glyma.11G007100	76	0.00220906	PF07714	Protein kinase superfamily protein
Glyma.09G087900	76	0.00448888	PF04050,PF02854	binding;RNA binding
Glyma.01G194700	75.3932	0.00027287	PF13508,PF00696	N-acetyl-l-glutamate synthase 1
Glyma.08G227900	75	7.39e-05
Glyma.13G346300	75	0.00233815	PF00564,PF02042	Plant regulator RWP-RK family protein
Glyma.01G068000	75	0.00318977	PF02518,PF00183	Chaperone protein htpG family protein
Glyma.06G093500	75	0.00413333	PF01753,PF13423	ubiquitin-specific protease 16
Glyma.11G181500	74.6667	0.000332712	PF02338	OTU-like cysteine protease family protein
Glyma.13G182800	74.4248	0.000250717	PF06749	Protein of unknown function (DUF1218)
Glyma.20G119100	74.3333	0.00167896	PF00481	Protein phosphatase 2C family protein
Glyma.02G192600	73.9231	0.00398328	PF06886	TPX2 (targeting protein for Xklp2) protein family
Glyma.19G193700	73.8077	0.00076362	PF01156	uridine-ribohydrolase 1
Glyma.07G248000	73.7778	0.00410312	PF00481	Protein phosphatase 2C family protein
Glyma.18G298500	73.3333	0.00199071	PF07786	Protein of unknown function (DUF1624)
Glyma.12G054000	72.8	0.000383371	PF00232	beta glucosidase 17
Glyma.09G002300	72.4074	0.00199405	PF03476,PF03473,PF00266	molybdenum cofactor sulfurase (LOS5) (ABA3)
Glyma.01G094800	72.3333	0.00119972	PF02493	Histone H3 K4-specific methyltransferase SET7/9 family protein
Glyma.08G287600	72	0.00215187	PF13394,PF04055	Radical SAM superfamily protein
Glyma.17G203800	71.4	0.00405749	PF13639	RING/U-box superfamily protein
Glyma.19G105500	71.0806	0.00340909	PF06839	GRF zinc finger / Zinc knuckle protein
Glyma.06G145900	71	0.000306905	PF10408,PF00622	related to KPC1
Glyma.09G136900	71	0.00115394	PF00753,PF07521,PF10996,PF13299	cleavage and polyadenylation specificity factor 100
Glyma.07G063300	71	0.00215941	PF00931	NB-ARC domain-containing disease resistance protein
Glyma.20G221300	70.8571	0.000519224	PF14365,PF03080	Protein of Unknown Function (DUF239)
Glyma.02G174100	70.75	0.000431426	PF04851,PF07529,PF00271	SNF2 domain-containing protein / helicase domain-containing protein
Glyma.12G008500	70.1429	0.00265453	PF07227,PF16312	Protein of unknown function (DUF1423)
Glyma.06G152900	70	0.00280681	PF02365	NAC domain containing protein 82
Glyma.17G031500	70	0.0039896	PF14383,PF14309
Glyma.13G236800	69.8636	3.94e-05	PF00642	Zinc finger C-x8-C-x5-C-x3-H type family protein
Glyma.17G143500	69.5	0.00138263	PF03016	Exostosin family protein
Glyma.01G164600	69	0.00283599	PF00141	ascorbate peroxidase 3
Glyma.06G074700	69	0.00413606
Glyma.06G063400	69	0.00413606	PF00628,PF08074,PF04851,PF00271,PF06465,PF00385,PF06461	chromatin remodeling factor CHD3 (PICKLE)
Glyma.09G184700	68.6	0.00299394	PF03372	DNAse I-like superfamily protein
Glyma.07G199200	68.25	0.00255948	PF00153	Mitochondrial substrate carrier family protein
Glyma.17G253000	67.8571	0.00383868	PF03765,PF00650	Sec14p-like phosphatidylinositol transfer family protein
Glyma.19G095000	67.3333	0.000239889
Glyma.16G137300	66.6	0.00111966	PF05729,PF13676	disease resistance protein (TIR-NBS-LRR class), putative
Glyma.02G275900	66.5	0.00149297	PF14531,PF03822	CBL-interacting protein kinase 3
Glyma.05G176400	66.5	0.00334469	PF00076	RNA-binding (RRM/RBD/RNP motifs) family protein
Glyma.13G027200	66	0.00481722
Glyma.10G209100	65.8571	0.00241597	PF02338	Cysteine proteinases superfamily protein
Glyma.12G089700	65	0.0042881	PF04810,PF04815,PF04811	sec23/sec24 transport family protein
Glyma.16G048800	64.75	0.00121211	PF02140,PF01301	beta-galactosidase 7
Glyma.07G113200	64.581	0.00391168	PF03547	Auxin efflux carrier family protein
Glyma.10G204900	64.5714	0.000799153	PF13920,PF10269	Transmembrane Fragile-X-F-associated protein
Glyma.18G256000	64.3333	0.000732963	PF00847	Integrase-type DNA-binding superfamily protein
Glyma.10G168300	64.1818	0.00136586	PF14365,PF03080	Protein of Unknown Function (DUF239)
Glyma.08G229600	64.1	0.00183608	PF03343	SART-1 family
Glyma.07G074800	64	0.00175893	PF00271,PF00270	P-loop containing nucleoside triphosphate hydrolases superfamily protein
Glyma.16G034400	64	0.00257302		Transducin/WD40 repeat-like superfamily protein
Glyma.13G184500	64	0.00328813	PF00249,PF00439	bromodomain 4
Glyma.15G176200	63.7778	0.00026811
Glyma.10G171500	63.5	0.00251039	PF14237,PF00076	RNA binding (RRM/RBD/RNP motifs) family protein
Glyma.05G046000	63.4286	0.00192515	PF00069	Protein kinase superfamily protein
Glyma.20G229000	63	0.000315219	PF00291	cysteine synthase D1
Glyma.08G006500	63	0.00265425	PF00262	calnexin 1
Glyma.09G120200	63	0.00460508	PF03989,PF00521	DNA GYRASE A
Glyma.16G207900	62.125	0.00112212	PF08642
Glyma.04G151500	62	0.00277877	PF03357	SNF7 family protein
Glyma.03G080200	62	0.0034811
Glyma.12G190800	61.8	0.000344635	PF13639	RING-H2 group F2A
Glyma.20G202100	61.6667	0.00159326	PF00917	TRAF-like superfamily protein
Glyma.16G046600	61.5	0.00365437	PF13202,PF13499,PF00153	Mitochondrial substrate carrier family protein
Glyma.04G018100	61.2143	0.0004439	PF08142,PF04950
Glyma.01G060700	61.2	0.00146114	PF00271,PF04408,PF07717	RNA helicase family protein
Glyma.14G119400	61	0.00279012	PF09377,PF01172	sequence-specific DNA binding transcription factors
Glyma.04G026100	61	0.00331334	PF00415	Regulator of chromosome condensation (RCC1) family protein
Glyma.09G063100	61	0.00495949	PF00400,PF12265	Transducin family protein / WD-40 repeat family protein
Glyma.13G186600	60	0.00158178	PF00083	zinc induced facilitator-like 1
Glyma.03G218300	60	0.00180831	PF01556,PF00226	DNAJ heat shock family protein
Glyma.03G133700	60	0.00270305	PF04851,PF00271,PF13892	INO80 ortholog
Glyma.11G136700	60	0.00292596	PF00806,PF07990	pumilio 2
Glyma.09G213700	59.7419	0.000395261
Glyma.16G012100	59.5	0.00443022	PF03914	CCAAT-binding factor
Glyma.02G216000	59.4	0.0011627	PF00627,PF14377,PF06012,PF06025,PF00632	ubiquitin-protein ligase 1
Glyma.02G251900	59.2143	0.00428755	PF00153	Mitochondrial substrate carrier family protein
Glyma.16G095200	59	0.00237104	PF00170,PF07777,PF16596	basic region/leucine zipper transcription factor 16
Glyma.08G356300	59	0.00311821	PF07800	Protein of unknown function (DUF1644)
Glyma.08G210000	59	0.00419505	PF04003
Glyma.12G027100	58.5	0.00209445	PF13676,PF00931	disease resistance protein (TIR-NBS-LRR class), putative
Glyma.05G209900	58.2533	0.00122656	PF04749	PLAC8 family protein
Glyma.17G038700	58.0909	0.00040721	PF12711,PF00225	phragmoplast orienting kinesin 1
Glyma.03G146200	58	0.00167548	PF04130	spindle pole body component 98
Glyma.06G056500	58	0.00244902	PF02736,PF00612,PF01843,PF00063	myosin, putative
Glyma.02G046900	58	0.00308733	PF02809,PF13519	regulatory particle non-ATPase 10
Glyma.17G175000	57.625	0.00484479
Glyma.06G045200	57.5	0.00255885	PF12174,PF05236	TBP-associated factor 4
Glyma.08G111400	57.5	0.00395973	PF13020	Histidine kinase-, DNA gyrase B-, and HSP90-like ATPase family protein
Glyma.08G156800	57.4545	0.000693673	PF04652,PF14288,PF02364	callose synthase 5
Glyma.15G237300	57.3333	0.000398292	PF03145	Protein with RING/U-box and TRAF-like domains
Glyma.U001700	57.25	0.00333011	PF00005,PF12698	ABC2 homolog 7
Glyma.15G025800	57.2	0.000804358	PF12710,PF16209,PF16212	ATPase E1-E2 type family protein / haloacid dehalogenase-like hydrolase family protein
Glyma.15G136300	57	0.00310165	PF00397,PF04851,PF00271	DEAD box RNA helicase family protein
Glyma.09G238100	56.5	0.00170337	PF01490	Transmembrane amino acid transporter family protein
Glyma.17G000600	56.5	0.00170337	PF03372	Endonuclease/exonuclease/phosphatase family protein
Glyma.19G222700	56.5	0.00195317	PF00481	Protein phosphatase 2C family protein
Glyma.10G211400	56	0.000510248	PF01264	chorismate synthase, putative / 5-enolpyruvylshikimate-3-phosphate phospholyase, putative
Glyma.03G252300	55.6667	0.00189962	PF12074,PF13646	ILITYHIA
Glyma.08G264800	55.6111	7.27e-05	PF07722,PF06418	CTP synthase family protein
Glyma.19G102000	55.5	0.00175574	PF00010	basic helix-loop-helix (bHLH) DNA-binding superfamily protein
Glyma.06G324500	55.5	0.00248131	PF03467	Smg-4/UPF3 family protein
Glyma.06G148700	55.5	0.00420395	PF13893,PF15519,PF00076	Splicing factor, CC1-like
Glyma.09G259400	55	0.000411275	PF09497	RNA polymerase II transcription mediators
Glyma.02G027400	55	0.0032811	PF00072	response regulator 3
Glyma.11G008600	54.5	0.00227075		RING/FYVE/PHD zinc finger superfamily protein
Glyma.07G163000	54.125	6.52e-05
Glyma.U027900	54.1111	0.000840193	PF14360	Arabidopsis Inositol phosphorylceramide synthase 1
Glyma.06G189500	54	0.0044891	PF01535,PF13041	Pentatricopeptide repeat (PPR) superfamily protein
Glyma.16G062000	53.7143	0.00291224	PF13964,PF13418	Galactose oxidase/kelch repeat superfamily protein
Glyma.09G002400	53.6667	0.00103994	PF00069	Protein kinase family protein with ARM repeat domain
Glyma.12G007900	53.5	0.00375179		PHD finger family protein
Glyma.02G224600	53.0909	0.00233401	PF00854	peptide transporter 1
Glyma.07G216600	53	0.00152913	PF00118,PF01504	FORMS APLOID AND BINUCLEATE CELLS 1C
Glyma.10G292400	53	0.00209262
Glyma.12G114000	53	0.00347945	PF00069	Protein kinase superfamily protein
Glyma.09G018700	53	0.00371776	PF00730
Glyma.13G037400	53	0.00424474	PF05631	Major facilitator superfamily protein
Glyma.08G196200	53	0.00431282	PF02812,PF00208	Amino acid dehydrogenase family protein
Glyma.10G187400	52.8571	0.000366645	PF00892	nodulin MtN21 /EamA-like transporter family protein
Glyma.01G022400	52.8571	0.00259762	PF00069	Protein kinase superfamily protein
Glyma.13G112600	52.75	0.000215308	PF02309,PF02362,PF06507	Transcriptional factor B3 family protein / auxin-responsive factor AUX/IAA-related
Glyma.17G062900	52	0.00407104	PF11559	Afadin/alpha-actinin-binding protein
Glyma.10G102800	52	0.00468234	PF03485	Arginyl-tRNA synthetase, class Ic
Glyma.19G125600	51.8571	0.000366192	PF14641,PF14632,PF14639,PF14635,PF14878,PF14633	global transcription factor group B1
Glyma.17G213500	51.5	0.00213031	PF00564,PF13414	Octicosapeptide/Phox/Bem1p (PB1) domain-containing protein / tetratricopeptide repeat (TPR)-containing protein
Glyma.15G261000	51.3488	0.00327661
Glyma.07G069800	51	0.00369966	PF03931,PF01466	SKP1-like 21
Glyma.11G038500	51	0.00396361	PF02732	Restriction endonuclease, type II-like superfamily protein
Glyma.01G112200	50.7143	0.00199071	PF13676,PF00931	Disease resistance protein (TIR-NBS-LRR class) family
Glyma.20G178500	50.6667	0.000380426	PF00249	Duplicated homeodomain-like superfamily protein
Glyma.06G293200	50.5	0.000347295
Glyma.03G184600	50	0.000434667	PF13639	Transducin/WD40 repeat-like superfamily protein
Glyma.14G126200	50	0.00392107	PF04862	Protein of unknown function, DUF642
Glyma.12G004200	50	0.00435744	PF00406	P-loop containing nucleoside triphosphate hydrolases superfamily protein
Glyma.05G115200	49.6	0.000283597	PF01535,PF13041	Pentatricopeptide repeat (PPR) superfamily protein
Glyma.08G161000	49.5556	0.000574754	PF07722,PF06418	CTP synthase family protein
Glyma.08G352600	49.5	0.00219357	PF13921,PF07529	Helicase/SANT-associated, DNA binding protein
Glyma.06G112300	49.5	0.00226938	PF09649
Glyma.12G167800	49.25	0.000403825	PF00400,PF08145	Transducin/WD40 repeat-like superfamily protein
Glyma.18G210100	49	0.000405183	PF03127,PF00790	ENTH/VHS/GAT family protein
Glyma.12G159600	49	0.000405183	PF14259,PF00076	RNA-binding (RRM/RBD/RNP motifs) family protein
Glyma.03G211200	49	0.000980704	PF07496	CW-type Zinc Finger
Glyma.07G012400	49	0.0042389	PF07303	dentin sialophosphoprotein-related
Glyma.10G210000	48.95	0.0011303	PF17047,PF00168	Calcium-dependent lipid-binding (CaLB domain) family protein
Glyma.11G023700	48.5	0.00475383	PF01388,PF02928,PF02375,PF00628,PF08429,PF02373	transcription factor jumonji (jmjC) domain-containing protein
Glyma.07G226700	48.4737	0.00110556	PF03763	Remorin family protein
Glyma.13G214900	48.3158	0.00024715	PF00646,PF01167	tubby like protein 3
Glyma.04G066600	48.125	0.00179763
Glyma.08G162800	48	0.00303467	PF13893,PF00642	Zinc finger C-x8-C-x5-C-x3-H type family protein
Glyma.08G166200	47.881	0.00262273	PF14541	Eukaryotic aspartyl protease family protein
Glyma.15G163800	47.7778	0.0036772	PF06862
Glyma.12G143400	47.5	0.00234071		UDP-glucuronic acid decarboxylase 1
Glyma.02G024200	47	0.0042205	PF04601	Actin cross-linking protein
Glyma.02G155000	47	0.00454882	PF05496	AAA-type ATPase family protein
Glyma.11G031400	46.8333	0.00349528	PF15413,PF01237	OSBP(oxysterol binding protein)-related protein 2A
Glyma.20G191400	46.8	0.000345879	PF13920	RING/U-box superfamily protein
Glyma.14G223000	46.2	0.00324115	PF07731,PF07732,PF00394	SKU5 similar 5
Glyma.08G031700	46.1429	0.00231998	PF00365	phosphofructokinase 3
Glyma.08G014800	46	0.00216081	PF00307,PF00225	P-loop nucleoside triphosphate hydrolases superfamily protein with CH (Calponin Homology) domain
Glyma.15G128700	46	0.00235147	PF00141	Peroxidase superfamily protein
Glyma.03G004900	46	0.00263835	PF04818	ENTH/VHS family protein
Glyma.10G294700	46	0.00328767	PF00566	Ypt/Rab-GAP domain of gyp1p superfamily protein
Glyma.03G166400	46	0.00328767	PF00249,PF14379	phosphate starvation response 1
Glyma.11G038000	45.8	0.00128422	PF00856,PF05033,PF02182	SU(VAR)3-9 homolog 6
Glyma.13G147300	45.6	0.000887465	PF10358
Glyma.07G027800	45.5	0.00193336	PF16987
Glyma.03G139300	45.3269	0.00138971	PF07974,PF03016	exostosin family protein
Glyma.17G213600	45.2857	0.00383382	PF13833,PF00036	calcium-binding EF hand family protein
Glyma.09G158300	44.6667	0.00298829	PF02213,PF02201,PF03126	SWIB/MDM2 domain;Plus-3;GYF
Glyma.15G166600	44.5	0.00454987	PF00013	RNA-binding KH domain-containing protein
Glyma.15G020900	44.381	0.000609968	PF00365	phosphofructokinase 3
Glyma.05G133100	44.1429	0.000807343	PF00627,PF14377,PF06012,PF00632,PF06025	ubiquitin-protein ligase 1
Glyma.09G188700	44.0797	0.00492069	PF01740,PF00916	sulfate transporter 3;1
Glyma.01G084800	44	0.00123036	PF01490	Transmembrane amino acid transporter family protein
Glyma.19G003100	44	0.00357877	PF04724	beta-1,4-N-acetylglucosaminyltransferase family protein
Glyma.08G074400	43.8889	0.00494574	PF00646,PF01344	Galactose oxidase/kelch repeat superfamily protein
Glyma.17G044000	43.6	0.0047117	PF16206,PF16213,PF09324,PF12783,PF01369	HOPM interactor 7
Glyma.18G256400	43.4342	0.00187973	PF07847	Protein of unknown function (DUF1637)
Glyma.13G067800	43.4	0.000934748	PF08295,PF02671,PF16879	SIN3-like 2
Glyma.02G073400	43	0.000560071
Glyma.17G211100	43	0.00374113	PF06886	TPX2 (targeting protein for Xklp2) protein family
Glyma.08G293700	43	0.00453334
Glyma.02G276000	43	0.00488254	PF00069	cyclin-dependent kinase C;1
Glyma.08G218100	42.8636	0.00411216	PF01073	cinnamoyl coa reductase 1
Glyma.20G055400	42.75	0.000829106
Glyma.02G101800	42.5	0.00368863		nuclear matrix constituent protein-related
Glyma.10G038600	42.3333	0.00208034	PF00069	casein kinase I-like 6
Glyma.09G278600	42.2857	0.000588361	PF03127,PF00790	ENTH/VHS/GAT family protein
Glyma.05G244700	42.1429	0.000182355	PF00025	RAB GTPase homolog A6A
Glyma.06G292200	41.8947	0.000728485	PF00069	Protein kinase superfamily protein
Glyma.02G206000	41.875	0.00313194	PF04484	Family of unknown function (DUF566)
Glyma.14G222100	41.75	0.00120301	PF01466,PF03931	S phase kinase-associated protein 1
Glyma.14G112400	41.7143	0.000362232	PF03789,PF03790,PF05920,PF03791	KNOTTED1-like homeobox gene 3
Glyma.17G022300	41.7143	0.000847556	PF04851,PF00271,PF14619	P-loop containing nucleoside triphosphate hydrolases superfamily protein
Glyma.17G024600	41.5	0.00200286	PF00249,PF06584	DNA binding
Glyma.17G249900	41.5	0.00290638	PF02213	GYF domain-containing protein
Glyma.18G241300	41.5	0.00302762	PF00642	zinc finger protein 1
Glyma.19G065400	41.5	0.00397756	PF00855	Tudor/PWWP/MBT superfamily protein
Glyma.13G158400	41	0.00079672		Transducin family protein / WD-40 repeat family protein
Glyma.06G227500	41	0.00142896	PF04859	Plant protein of unknown function (DUF641)
Glyma.18G021100	41	0.00315159	PF01019	gamma-glutamyl transpeptidase 1
Glyma.14G012400	40.6667	0.00251454	PF03169	oligopeptide transporter 1
Glyma.17G257100	40.5	0.001899	PF00098,PF03159	5'-3' exoribonuclease 3
Glyma.14G223100	40.5	0.00459758	PF00240	Ubiquitin-like superfamily protein
Glyma.14G024000	40	0.0022221
Glyma.09G268900	40	0.00280705	PF03479	AT-hook motif nuclear-localized protein 1
Glyma.04G064100	39.8	0.00188873	PF03789,PF03790,PF05920,PF03791	KNOTTED1-like homeobox gene 3
Glyma.14G159400	39.6667	0.00270136	PF10497,PF02373	Transcription factor jumonji (jmjC) domain-containing protein
Glyma.11G182900	39.6667	0.00434168	PF00076	RNA-binding (RRM/RBD/RNP motifs) family protein
Glyma.16G221700	39.6	0.000255791	PF08147,PF00271,PF00270	hydrolases, acting on acid anhydrides, in phosphorus-containing anhydrides;ATP-dependent helicases;nucleic acid binding;ATP binding;RNA binding;helicases
Glyma.05G136000	39.6	0.00184029	PF08265,PF05764	sequence-specific DNA binding transcription factors;DNA binding;DNA binding
Glyma.04G091700	39.6	0.00220467	PF01753,PF13423	ubiquitin-specific protease 16
Glyma.10G274000	39.5	0.00315071
Glyma.12G083300	39.5	0.00315071	PF00637	vacuolar protein sorting 41
Glyma.18G274100	39.4	0.00142936	PF14817
Glyma.01G164500	39.3333	0.0031768	PF04783,PF04782	Protein of unknown function (DUF630) ;Protein of unknown function (DUF632)
Glyma.05G089200	39.25	0.000531024	PF13906,PF13520	cationic amino acid transporter 2
Glyma.14G078300	39.2162	0.000283591
Glyma.07G036600	39	0.000637363	PF06972	Kinase-related protein of unknown function (DUF1296)
Glyma.04G187900	39	0.000681634	PF02893,PF00168,PF16016	C2 calcium/lipid-binding and GRAM domain containing protein
Glyma.19G243700	38.7143	0.000738191	PF13178,PF00612	IQ-domain 19
Glyma.04G061700	38.3333	0.000929029
Glyma.08G156400	38	0.00126509	PF00454	phosphatidylinositol 4-OH kinase beta1
Glyma.05G008500	38	0.00256934
Glyma.20G185600	38	0.00341538	PF13920,PF10269	Transmembrane Fragile-X-F-associated protein
Glyma.11G224200	37.6173	0.00387274	PF00854	Major facilitator superfamily protein
Glyma.05G094000	37.5	0.00442647	PF04095	nicotinate phosphoribosyltransferase 2
Glyma.18G077700	37.4444	0.00119221	PF08766	DEK domain-containing chromatin associated protein
Glyma.06G075000	37.25	0.00256076		DDB1-CUL4 associated factor 1
Glyma.17G219600	37.0625	0.000736038	PF01713,PF08590	CTC-interacting domain 7
Glyma.15G253800	37	0.00357179	PF00271,PF00270,PF02889	U5 small nuclear ribonucleoprotein helicase, putative
Glyma.18G208100	36.8333	0.00120151	PF00481	Protein phosphatase 2C family protein
Glyma.08G354500	36.6667	0.00210803	PF08513,PF00400	LEUNIG_homolog
Glyma.01G094200	36.6667	0.00376192	PF02847,PF02854	eukaryotic translation initiation factor 4G
Glyma.08G016600	36.5	0.00222945	PF04749	PLAC8 family protein
Glyma.07G175000	36.4286	0.0049979	PF07722	anthranilate synthase beta subunit 1
Glyma.02G144200	36.4	0.00279628	PF00400,PF14844,PF02138	Beige/BEACH domain ;WD domain, G-beta repeat protein
Glyma.07G192500	36.3667	0.00160465	PF13923,PF00271,PF00176	SNF2 domain-containing protein / helicase domain-containing protein / zinc finger protein-related
Glyma.14G035100	36.2368	0.00247531
Glyma.20G036600	35.913	0.000552743	PF07891	Protein of unknown function (DUF1666)
Glyma.15G047600	35.9	0.000189812
Glyma.04G192300	35.7241	0.00275292	PF14288,PF02364	glucan synthase-like 8
Glyma.10G225800	35.6923	0.00161137	PF01926,PF03144,PF11987	eukaryotic translation initiation factor 2 (eIF-2) family protein
Glyma.09G276800	35.6	0.000916091	PF00860	AZA-guanine resistant1
Glyma.04G172900	35.5253	0.00358681	PF13304	ABC2 homolog 6
Glyma.16G182200	35.4	0.00473117
Glyma.09G084300	35.2727	0.00281659		Outer arm dynein light chain 1 protein
Glyma.19G208400	34.6667	0.00176537	PF07496	CW-type Zinc Finger
Glyma.02G085500	34.6667	0.00317614	PF07058	microtubule-associated proteins 70-2
Glyma.17G070500	34.5	0.00394836	PF01536	S-adenosylmethionine decarboxylase
Glyma.08G107500	34.4286	0.00305472	PF00201	indole-3-acetate beta-D-glucosyltransferase
Glyma.06G003600	34.35	0.00356124	PF00632	HEAT repeat ;HECT-domain (ubiquitin-transferase)
Glyma.18G174200	34.1875	0.00327877	PF00564,PF07714	Protein kinase superfamily protein with octicosapeptide/Phox/Bem1p domain
Glyma.16G082400	34	0.000872497	PF00626,PF04810,PF04815,PF08033,PF04811	Sec23/Sec24 protein transport family protein
Glyma.05G025300	34	0.00379659	PF00834	D-ribulose-5-phosphate-3-epimerase
Glyma.07G042100	33.75	0.00155529	PF12090
Glyma.15G192300	33.5714	0.00210867	PF07928	VPS54
Glyma.13G309700	33.5556	0.000549243	PF14634,PF00271,PF00176	Helicase protein with RING/U-box domain
Glyma.20G055800	33.5	0.000567184	PF00254	FKBP-like peptidyl-prolyl cis-trans isomerase family protein
Glyma.04G073900	33.5	0.0041506		DDB1-CUL4 associated factor 1
Glyma.01G164100	33.3333	0.00266992	PF03635	VPS35 homolog A
Glyma.07G141000	33.25	0.001699
Glyma.03G188600	33	0.00227131	PF10312,PF09732
Glyma.14G216900	33	0.00279341	PF13450,PF04433	LSD1-like 3
Glyma.13G170000	33	0.00434192	PF00439,PF15612,PF01429,PF00628	methyl-CPG-binding domain 9
Glyma.12G020000	32.6154	0.0023439	PF11891	Protein of unknown function (DUF3411)
Glyma.19G199500	32.6	0.000320174	PF05920,PF07526	BEL1-like homeodomain 1
Glyma.15G031900	32.6	0.00337778	PF00270,PF00271,PF07717,PF04408	RNA helicase family protein
Glyma.08G119700	32	0.00136875	PF04564,PF00514	plant U-box 17
Glyma.12G068500	32	0.0014478	PF14531	geminivirus rep interacting kinase 2
Glyma.07G066600	32	0.00202518	PF00069	Protein kinase superfamily protein
Glyma.15G236400	32	0.00211128	PF00249	Homeodomain-like protein with RING/FYVE/PHD-type zinc finger domain
Glyma.U031300	32	0.00458015	PF04836,PF05004	interferon-related developmental regulator family protein / IFRD protein family
Glyma.03G134200	31.9333	0.00137269	PF00690,PF12515,PF12710,PF00689,PF00122	autoinhibited Ca2+-ATPase 11
Glyma.09G086800	31.766	0.000788384	PF04137	endoplasmic reticulum oxidoreductins 2
Glyma.14G004300	31.6667	0.000460015	PF00293	nudix hydrolase homolog 2
Glyma.17G038400	31.6667	0.00110729	PF04146	evolutionarily conserved C-terminal region 7
Glyma.17G065600	31.6	0.000853618	PF00370,PF02782	FGGY family of carbohydrate kinase
Glyma.04G095600	31.5	0.00487008
Glyma.10G218400	31.3333	0.000364014	PF00118,PF01504	FORMS APLOID AND BINUCLEATE CELLS 1A
Glyma.14G217400	31.3333	0.00342286	PF00270,PF00271,PF00575,PF07717,PF04408	RNA helicase family protein
Glyma.13G059400	31.2857	0.00212799		chorismate mutase 1
Glyma.13G025900	31	0.00484167	PF07227,PF16312	Protein of unknown function (DUF1423)
Glyma.13G113900	30.75	0.000910882		alpha/beta-Hydrolases superfamily protein
Glyma.18G142500	30.7143	0.0018372	PF01326	Pyruvate phosphate dikinase, PEP/pyruvate binding domain
Glyma.05G064100	30.5	0.00487861	PF00036	calcium-dependent protein kinase 29
Glyma.08G223000	30.3333	0.0022685	PF08700,PF16528	exocyst complex component 84B
Glyma.16G201500	30.2222	0.00333405	PF00069,PF07714	Protein kinase superfamily protein
Glyma.12G053300	30	0.0012455
Glyma.U040600	29.6667	0.00178991	PF00394,PF07731	Cupredoxin superfamily protein
Glyma.04G111900	29.5714	0.00137854	PF16544	RNA-binding KH domain-containing protein
Glyma.12G067700	29.5556	0.00143813	PF13848,PF00085	PDI-like 1-4
Glyma.15G063700	29.5	0.00309041
Glyma.13G080300	29.3333	0.00352617		ARM repeat superfamily protein
Glyma.04G124300	29	0.00216749	PF04434,PF10551,PF03101	far-red elongated hypocotyls 3
Glyma.03G055900	28.75	0.0042699	PF00962	AMP deaminase, putative / myoadenylate deaminase, putative
Glyma.15G069300	28.6667	0.00196484	PF00249,PF00439	bromodomain 4
Glyma.09G014600	28.5	0.00174351		binding
Glyma.15G169800	28.5	0.00198796	PF00400,PF12265	Transducin family protein / WD-40 repeat family protein
Glyma.06G295600	28.3333	0.00194498
Glyma.04G067000	28.3333	0.00301897	PF13259
Glyma.19G226700	28.3333	0.00348843	PF00479,PF02781	glucose-6-phosphate dehydrogenase 4
Glyma.08G060500	28.125	0.000506041	PF08276,PF00954,PF01453,PF07714	S-locus lectin protein kinase family protein
Glyma.14G071900	28.1176	0.00293719	PF03765,PF00650	Sec14p-like phosphatidylinositol transfer family protein
Glyma.20G013500	28.0769	0.00105986	PF00118,PF01504	FORMS APLOID AND BINUCLEATE CELLS 1C
Glyma.15G266600	27.9583	0.00197595	PF07722,PF06418	CTP synthase family protein
Glyma.13G066200	27.8333	0.00103557	PF00439	DNA-binding bromodomain-containing protein
Glyma.10G102200	27.8333	0.00260967	PF15477
Glyma.15G267700	27.8	0.00495103	PF13347	Major facilitator superfamily protein
Glyma.01G063600	27.75	0.000797411	PF08620,PF08621
Glyma.05G070500	27.6338	0.00148415	PF14572,PF13793	Phosphoribosyltransferase family protein
Glyma.17G008400	27.4138	0.00258099	PF00240,PF00632	ubiquitin protein ligase 5
Glyma.10G224900	27.2857	0.0016188	PF00646,PF01167	tubby like protein 10
Glyma.08G214900	27.0964	0.0043174	PF16987
Glyma.16G051500	27	0.000204642	PF13915,PF13889
Glyma.10G127400	27	0.000573267	PF08543	hydroxyethylthiazole kinase family protein
Glyma.11G024700	27	0.00183141	PF08263,PF07714	Leucine-rich repeat protein kinase family protein
Glyma.19G083100	26.75	0.000189214	PF00135	alpha/beta-Hydrolases superfamily protein
Glyma.03G124700	26.7273	0.00111366	PF08711	Transcription elongation factor (TFIIS) family protein
Glyma.10G135500	26.7103	0.00457772		F-box/RNI-like/FBD-like domains-containing protein
Glyma.08G143200	26.6667	0.00227216	PF14649
Glyma.07G078000	26.625	0.00153571	PF00931	NB-ARC domain-containing disease resistance protein
Glyma.06G196900	26.5385	0.00165994	PF07714	Protein kinase superfamily protein
Glyma.13G172200	26.5	0.0031289	PF05918	Apoptosis inhibitory protein 5 (API5)
Glyma.10G018000	26.4211	0.00276442	PF01699	magnesium/proton exchanger
Glyma.05G237500	26.1719	0.000739762	PF13639,PF05495,PF14599,PF01814	zinc finger protein-related
Glyma.05G035100	26.1667	0.00275652	PF08711	BAH domain ;TFIIS helical bundle-like domain
Glyma.08G292600	26	0.00243145	PF02181	formin 8
Glyma.02G014000	25.9286	0.00141463	PF13098,PF07749	thioredoxin family protein
Glyma.10G135300	25.9124	0.00201176
Glyma.15G028100	25.6667	0.00118671
Glyma.12G036400	25.6667	0.0023754	PF00170	Basic-leucine zipper (bZIP) transcription factor family protein
Glyma.15G021000	25.5	0.00377545	PF13541,PF13481	ATP-dependent peptidases;nucleotide binding;serine-type endopeptidases;DNA helicases;ATP binding;damaged DNA binding;nucleoside-triphosphatases
Glyma.07G088200	25.4375	0.00066366	PF01740,PF00916	sulfate transporter 3;5
Glyma.19G188800	25.4286	0.00361505	PF10312,PF09732
Glyma.04G044000	25.3158	0.000313615	PF01566	NRAMP metal ion transporter 2
Glyma.19G237800	25.2857	2.32e-05	PF03917	glutathione synthetase 2
Glyma.09G222900	25.2308	0.00411239
Glyma.14G214700	25.0909	0.000495641	PF08263,PF00069	receptor-like kinase 1
Glyma.15G129500	24.8	0.00318315	PF00933,PF01915	Glycosyl hydrolase family protein
Glyma.10G280700	24.75	0.00101939	PF00626,PF04810,PF04815,PF08033,PF04811	Sec23/Sec24 protein transport family protein
Glyma.01G008700	24.7241	0.00122647	PF05183	RNA-dependent RNA polymerase family protein
Glyma.17G121400	24.7083	0.00212061	PF01624,PF05188,PF05190,PF05192,PF00488	MUTS homolog 2
Glyma.08G076800	24.5639	0.00128047	PF00892	nodulin MtN21 /EamA-like transporter family protein
Glyma.10G081700	24.52	0.00224051	PF05920,PF07526	BEL1-like homeodomain 1
Glyma.15G102000	24.4167	0.00299732	PF03951,PF00120	glutamine synthetase 2
Glyma.04G164200	24.3333	0.00215247
Glyma.14G001200	24	0.00126532	PF13202,PF12763	Calcium-binding EF hand family protein
Glyma.13G293300	24	0.00205423
Glyma.19G145300	24	0.00278033	PF00170,PF14144	bZIP transcription factor family protein
Glyma.01G142700	23.9	0.000230794	PF00270,PF07717,PF00271,PF04408	RNA helicase family protein
Glyma.02G165400	23.875	0.00136402	PF00270	P-loop containing nucleoside triphosphate hydrolases superfamily protein
Glyma.18G213600	23.7143	0.000299834	PF08263,PF00560,PF13855,PF00069	Leucine-rich receptor-like protein kinase family protein
Glyma.12G211700	23.6957	0.000171648	PF07847	Protein of unknown function (DUF1637)
Glyma.10G212600	23.6	0.00233343	PF00249	Duplicated homeodomain-like superfamily protein
Glyma.14G050200	23.5641	0.00450251	PF13920	histone mono-ubiquitination 2
Glyma.11G071000	23.5	0.00281862		auxin-like 1 protein
Glyma.12G192700	23.4	0.00322844	PF00097,PF00271,PF00176	Helicase protein with RING/U-box domain
Glyma.07G019100	23.3333	0.00146911	PF13193,PF00501	AMP-dependent synthetase and ligase family protein
Glyma.19G215100	23.3333	0.00266838	PF01556,PF00226	DNAJ heat shock family protein
Glyma.17G191000	23.3333	0.00299952	PF03127,PF00790	ENTH/VHS/GAT family protein
Glyma.19G132300	23.25	0.000276742	PF00072	response regulator 9
Glyma.04G130300	23.25	0.000939544	PF11717,PF01853	histone acetyltransferase of the MYST family 1
Glyma.17G242100	23.25	0.00116996		cold regulated gene 27
Glyma.12G185500	23	0.000474327	PF00786,PF00620	Rho GTPase activating protein with PAK-box/P21-Rho-binding domain
Glyma.13G256100	23	0.000973444	PF01926,PF02212,PF01031	dynamin-related protein 3A
Glyma.09G226400	23	0.0019046	PF12931	transducin family protein / WD-40 repeat family protein
Glyma.12G077400	23	0.00244625		ATP-dependent helicase family protein
Glyma.11G157400	23	0.00413221	PF13445,PF07714,PF13857,PF13637,PF12796	protein kinases;ubiquitin-protein ligases
Glyma.13G128500	22.8333	0.000825238	PF13921	myb family transcription factor
Glyma.09G199800	22.8333	0.00142316	PF00847	AINTEGUMENTA-like 6
Glyma.09G059300	22.8	0.00249762
Glyma.02G075300	22.75	0.00251679	PF01554	MATE efflux family protein
Glyma.08G010100	22.75	0.00348023	PF00240	Ubiquitin family protein
Glyma.20G136300	22.6667	0.00459777	PF05770	Inositol 1,3,4-trisphosphate 5/6-kinase family protein
Glyma.02G196500	22.5526	0.00215518	PF05920,PF07526	BEL1-like homeodomain 1
Glyma.09G234500	22.5	0.00393847	PF02862	shoot gravitropism 2 (SGR2)
Glyma.08G044700	22.4154	0.000588578	PF13639,PF05495,PF14599,PF01814	zinc finger protein-related
Glyma.08G257500	22.3636	0.00103157	PF13837	Homeodomain-like superfamily protein
Glyma.13G259300	22.3333	0.0041444	PF04502	Family of unknown function (DUF572)
Glyma.19G012100	22.1429	0.000375459	PF14416,PF13839	TRICHOME BIREFRINGENCE-LIKE 22
Glyma.03G172200	22.0435	0.00268201	PF01399	eukaryotic translation initiation factor 3A
Glyma.02G146500	22	0.00228822	PF16135	Acyl-CoA N-acyltransferase with RING/FYVE/PHD-type zinc finger protein
Glyma.07G228200	22	0.00248908	PF10250	O-fucosyltransferase family protein
Glyma.01G045100	22	0.00408329	PF01344	Galactose oxidase/kelch repeat superfamily protein
Glyma.13G264100	22	0.00476071	PF04096	Nucleoporin autopeptidase
Glyma.20G190500	21.8571	0.000581534	PF00534	UDP-Glycosyltransferase superfamily protein
Glyma.10G062800	21.8462	0.00253115	PF10358
Glyma.05G205900	21.819	0.000159679	PF03763	Remorin family protein
Glyma.06G127600	21.8	0.00348808
Glyma.17G071400	21.75	0.00107421	PF10377
Glyma.16G042900	21.7273	0.000940886	PF02365	Arabidopsis NAC domain containing protein 87
Glyma.14G064400	21.681	0.000868817	PF05922,PF00082	Subtilase family protein
Glyma.02G125200	21.5714	0.0009458	PF00010	basic helix-loop-helix (bHLH) DNA-binding superfamily protein
Glyma.19G069300	21.5185	0.00417572	PF13947,PF07714	Protein kinase superfamily protein
Glyma.08G329200	21.325	0.00073726	PF08766	DEK domain-containing chromatin associated protein
Glyma.08G251800	21.2028	0.0038874	PF07734,PF00646	F-box family protein
Glyma.09G017700	21	0.00376856	PF00400	Transducin/WD40 repeat-like superfamily protein
Glyma.15G194600	20.8333	0.00164332	PF00083	inositol transporter 2
Glyma.08G194500	20.8	0.0042974	PF07714	Protein kinase protein with adenine nucleotide alpha hydrolases-like domain
Glyma.18G077600	20.7586	0.00106678	PF08766	DEK domain-containing chromatin associated protein
Glyma.06G081600	20.6667	0.00446196	PF12717,PF09066	adaptin family protein
Glyma.02G090100	20.6068	0.00327586	PF01554	MATE efflux family protein
Glyma.07G069000	20.5	0.00198842	PF00954,PF01453,PF00069	receptor-like protein kinase 4
Glyma.18G276300	20.5	0.00252709	PF00498	SMAD/FHA domain-containing protein
Glyma.07G242500	20.3333	0.00245525	PF08969,PF01398	associated molecule with the SH3 domain of STAM 3
Glyma.19G184100	20.2632	8.23e-05	PF00403	Heavy metal transport/detoxification superfamily protein
Glyma.09G095700	20.2581	0.00101462	PF03789,PF03790,PF05920,PF03791	KNOTTED1-like homeobox gene 3
Glyma.20G187200	20.0227	0.00134968	PF07714,PF00069	Protein kinase superfamily protein
Glyma.13G183600	20	0.00448951	PF01397,PF03936	terpene synthase 04
Glyma.02G118500	20	0.00466428	PF16135,PF07897,PF16136	ABI five binding protein 3
Glyma.18G281800	19.875	0.000855901	PF13837	Homeodomain-like superfamily protein
Glyma.06G189600	19.8571	0.00143018	PF13499,PF07714	calcium-dependent protein kinase 1
Glyma.06G276400	19.8535	0.00112309	PF07847	Protein of unknown function (DUF1637)
Glyma.06G209000	19.8	0.000262178	PF00808	nuclear factor Y, subunit B13
Glyma.17G236700	19.8	0.00447093	PF00887	acyl-CoA-binding domain 3
Glyma.06G173500	19.8	0.0046229	PF14288,PF02364	glucan synthase-like 8
Glyma.13G091900	19.6667	0.000729123	PF13857,PF12796	XB3 ortholog 2 in Arabidopsis thaliana
Glyma.07G012000	19.6667	0.00248292		Protein phosphatase 2A, regulatory subunit PR55
Glyma.17G001700	19.5556	0.00320726	PF05557	mitotic checkpoint family protein
Glyma.17G042800	19.5484	0.00198048	PF02309	indole-3-acetic acid inducible 31
Glyma.11G203900	19.4737	0.00185068	PF04970	NC domain-containing protein-related
Glyma.02G029600	19.4286	0.000858287	PF00226	ARG1-like 1
Glyma.18G014100	19.3846	0.000367098	PF04724	beta-1,4-N-acetylglucosaminyltransferase family protein
Glyma.04G018400	19.3333	0.00441053
Glyma.05G066300	19.2727	0.00203838
Glyma.08G326000	19.1667	0.00122821	PF00076,PF12872	CCCH-type zinc fingerfamily protein with RNA-binding domain
Glyma.05G106000	19.1429	0.00289162	PF00249,PF00538	Homeodomain-like/winged-helix DNA-binding family protein
Glyma.18G001900	19	0.00226046
Glyma.18G274000	19	0.00384121	PF12678	RING/U-box superfamily protein
Glyma.08G329100	18.9655	0.000855551	PF08766	DEK domain-containing chromatin associated protein
Glyma.13G290400	18.8333	0.000877827	PF14381,PF07714	Mitogen activated protein kinase kinase kinase-related
Glyma.01G013600	18.8	0.00450329	PF00170,PF07777,PF16596	basic region/leucine zipper transcription factor 16
Glyma.17G048900	18.7778	0.00371446	PF07714	Protein kinase superfamily protein
Glyma.08G332000	18.75	0.00298156	PF17125,PF01189	S-adenosyl-L-methionine-dependent methyltransferases superfamily protein
Glyma.09G211400	18.6667	0.000412903	PF00249,PF14379	Homeodomain-like superfamily protein
Glyma.13G311800	18.6667	0.00122663	PF02485	Core-2/I-branching beta-1,6-N-acetylglucosaminyltransferase family protein
Glyma.06G013800	18.6667	0.00310549	PF00454,PF00613	Phosphatidylinositol 3- and 4-kinase family protein
Glyma.12G191700	18.6429	0.00182848	PF03552	cellulose synthase-like B3
Glyma.20G238800	18.6429	0.0018942	PF13639,PF00628	RING/U-box protein
Glyma.12G223300	18.5385	0.000979525
Glyma.08G356200	18.5152	0.00122378
Glyma.05G175500	18.4265	0.00322173	PF00925,PF00926	GTP cyclohydrolase II
Glyma.14G028100	18.4	0.00173103	PF06293	MAP kinase 20
Glyma.U026800	18.3333	0.00287011	PF07724,PF06480,PF01434	FTSH protease 9
Glyma.13G044100	18.3158	0.00264747	PF02458	HXXXD-type acyl-transferase family protein
Glyma.04G067800	18.1562	0.000101074	PF00153	Mitochondrial substrate carrier family protein
Glyma.08G026700	18	0.00490261	PF14604	SH3 domain-containing protein
Glyma.05G117000	17.8	0.00148549	PF01833,PF00612,PF03859	Calmodulin-binding transcription activator protein with CG-1 and Ankyrin domains
Glyma.15G043500	17.6667	0.00437297
Glyma.13G139200	17.64	0.000551252	PF12906	RING/U-box superfamily protein
Glyma.04G000600	17.5833	0.00197746	PF00564,PF02042	Plant regulator RWP-RK family protein
Glyma.03G075300	17.4167	0.000793173	PF13676,PF00931	Disease resistance protein (TIR-NBS-LRR class) family
Glyma.15G053600	17.4	0.00128869	PF01833,PF00612,PF12796,PF03859	Calmodulin-binding transcription activator protein with CG-1 and Ankyrin domains
Glyma.13G157300	17.375	0.000611133	PF03789,PF03790,PF05920,PF03791	KNOTTED1-like homeobox gene 3
Glyma.02G244400	17.3333	0.00320096	PF08263,PF00069	receptor-like kinase 1
Glyma.16G038400	17.3333	0.00365854	PF02854,PF02847	MIF4G domain-containing protein / MA3 domain-containing protein
Glyma.09G173400	17.275	0.00496612	PF00293	nudix hydrolase homolog 4
Glyma.10G095200	17.2727	0.00299696	PF05000,PF04983,PF04997,PF00623,PF04998	nuclear RNA polymerase A1
Glyma.08G150900	17.25	0.00198919	PF00931	NB-ARC domain-containing disease resistance protein
Glyma.13G110700	17.0476	0.00268923	PF07714	Protein kinase superfamily protein
Glyma.15G005500	17	0.00339059	PF16987
Glyma.13G036600	16.8621	0.00288082	PF13516,PF12937	RNI-like superfamily protein
Glyma.10G209600	16.8333	0.00350866	PF02375,PF02373	Zinc finger (C2H2 type) family protein / transcription factor jumonji (jmj) family protein
Glyma.17G104800	16.7746	0.000685899	PF03789,PF03790,PF05920,PF03791	KNOTTED1-like homeobox gene 3
Glyma.16G089300	16.6667	0.00399531	PF01227	GTP cyclohydrolase I
Glyma.06G082000	16.5312	0.00407877	PF01925	Sulfite exporter TauE/SafE family protein
Glyma.06G296900	16.5254	0.00072496	PF04144	secretory carrier 3
Glyma.08G132700	16.5046	0.000480816	PF00925,PF00926	GTP cyclohydrolase II
Glyma.04G061800	16.5	0.00484075
Glyma.02G045200	16.375	0.00377568	PF08159
Glyma.19G112600	16.3333	0.00164576	PF07797	Protein of unknown function (DUF1639)
Glyma.13G155700	16.3118	0.000797808	PF00149	Calcineurin-like metallo-phosphoesterase superfamily protein
Glyma.11G255200	16.2857	0.000341218
Glyma.12G202600	16.25	0.000491368	PF05623	Protein of unknown function (DUF789)
Glyma.18G280300	16.2222	0.00345171	PF13855,PF02902,PF00931	Cysteine proteinases superfamily protein
Glyma.08G170400	16.2	0.00176656	PF13920	SBP (S-ribonuclease binding protein) family protein
Glyma.02G229400	16.1463	0.000714978	PF07719,PF13414	tetratricopeptide repeat (TPR)-containing protein
Glyma.04G175300	16.1429	0.000233415	PF06293,PF13499	calcium-dependent protein kinase 1
Glyma.18G249600	16.1429	0.00296143	PF04727	ELMO/CED-12 family protein
Glyma.10G245700	16	0.0015582	PF03914,PF07540	binding
Glyma.08G060200	15.75	0.00223676	PF02373,PF08879	Zinc finger, RING-type;Transcription factor jumonji/aspartyl beta-hydroxylase
Glyma.02G251700	15.75	0.00249555	PF08662,PF00400,PF04158	nucleotide binding;protein binding
Glyma.06G000400	15.7273	0.000258783	PF02042	Plant regulator RWP-RK family protein
Glyma.08G201000	15.7273	0.00443347	PF03985	hydroxyproline-rich glycoprotein family protein
Glyma.17G023600	15.7	0.00278087	PF13892,PF09110,PF04851,PF00271,PF09111	chromatin remodeling factor17
Glyma.04G248700	15.6667	0.00400432	PF14543	Eukaryotic aspartyl protease family protein
Glyma.08G306600	15.6486	0.000589172
Glyma.11G107500	15.6	0.00315631	PF00632	HEAT repeat ;HECT-domain (ubiquitin-transferase)
Glyma.09G212900	15.5532	0.000969621	PF00069	Protein kinase superfamily protein
Glyma.03G121000	15.5	0.00121747	PF14641,PF14632,PF14639,PF14635,PF14878,PF14633	global transcription factor group B1
Glyma.10G036800	15.4286	0.00245935	PF07690	phosphate transporter 1;4
Glyma.17G234900	15.375	0.000613868	PF15811
Glyma.02G132700	15.3604	8.15e-05	PF08553	Vacuolar import/degradation, Vid27-related protein
Glyma.19G027500	15.2857	0.00141945	PF07839	Plant calmodulin-binding protein-related
Glyma.10G002100	15.2118	0.00251359	PF04720	Protein of unknown function (DUF506)
Glyma.10G203000	15.1905	0.000502738	PF00005,PF08370,PF01061	pleiotropic drug resistance 11
Glyma.18G049000	14.9875	1.22e-05	PF01230	FRAGILE HISTIDINE TRIAD
Glyma.20G124700	14.9355	0.00319169	PF00085,PF04777	quiescin-sulfhydryl oxidase 1
Glyma.18G106900	14.8889	0.00174509	PF00076,PF04059	MEI2-like protein 5
Glyma.04G002900	14.7708	0.000728745	PF00202	glutamate-1-semialdehyde 2,1-aminomutase 2
Glyma.11G195900	14.75	0.00347624	PF00118	chaperonin-60alpha
Glyma.06G192600	14.75	0.00378049	PF03271	end binding protein 1B
Glyma.19G020500	14.7426	0.00232843	PF07847	Protein of unknown function (DUF1637)
Glyma.16G019700	14.6923	0.000446318	PF00612,PF13178	IQ-domain 17
Glyma.19G254900	14.5833	0.00179794	PF00035,PF02170,PF00636	dicer-like 2
Glyma.02G198300	14.5556	0.00481224	PF03641	Putative lysine decarboxylase family protein
Glyma.03G200800	14.55	0.000252368	PF03641	Putative lysine decarboxylase family protein
Glyma.01G036500	14.4737	0.00316286	PF00226	ARG1-like 1
Glyma.03G202300	14.4545	0.000561756	PF05920,PF07526	BEL1-like homeodomain 1
Glyma.06G066800	14.4444	0.00277505
Glyma.07G202100	14.4	0.00317757	PF02841,PF02263	Guanylate-binding family protein
Glyma.13G058900	14.3889	0.00204623	PF07839	Plant calmodulin-binding protein-related
Glyma.04G048100	14.3077	0.00192202	PF13632	Cellulose-synthase-like C12
Glyma.07G265600	14.3	0.00443978	PF00240,PF00632	ubiquitin protein ligase 5
Glyma.01G044200	14.25	0.00264297	PF08449	UDP-galactose transporter 3
Glyma.03G172700	14.1731	0.00315044	PF00719	pyrophosphorylase 4
Glyma.08G152500	14.1667	0.00173602	PF00010	basic helix-loop-helix (bHLH) DNA-binding superfamily protein
Glyma.04G244100	14.1538	0.00113937	PF13947,PF00069	wall-associated kinase 2
Glyma.05G079700	14.0769	0.00125239	PF13499	calmodulin 5
Glyma.01G154300	14	0.00192177	PF10197	zinc knuckle (CCHC-type) family protein
Glyma.06G117400	14	0.00272913	PF08729	wound-responsive family protein
Glyma.20G051100	14	0.00434526	PF04783,PF04782	Protein of unknown function (DUF630 and DUF632)
Glyma.13G112900	13.875	0.00154762	PF08161	ARM repeat superfamily protein
Glyma.18G102500	13.7778	0.00347265	PF03151	Nucleotide/sugar transporter family protein
Glyma.06G142300	13.75	0.0041749	PF00072	response regulator 17
Glyma.17G146500	13.5549	0.00261977	PF01027	BAX inhibitor 1
Glyma.03G042800	13.5195	0.000324167	PF04535	Uncharacterised protein family (UPF0497)
Glyma.06G178200	13.5	0.00283704	PF01426,PF00145,PF12047	methyltransferase 1
Glyma.05G002000	13.5	0.00293533	PF05701	Plant protein of unknown function (DUF827)
Glyma.06G127500	13.5	0.00465786	PF12108,PF16837,PF13297,PF11931	splicing factor-related
Glyma.10G261400	13.4697	0.000339292	PF07991,PF01842,PF00389	D-3-phosphoglycerate dehydrogenase
Glyma.18G003000	13.4	0.00107	PF08263,PF00560,PF13855,PF07714	Leucine-rich repeat protein kinase family protein
Glyma.20G138900	13.3333	0.000950377	PF01657,PF07714	cysteine-rich RLK (RECEPTOR-like protein kinase) 29
Glyma.08G120400	13.3333	0.00222099	PF02212,PF01031,PF00350	Dynamin related protein 4C
Glyma.06G290400	13.2857	0.0023457	PF00097	RING 1A
Glyma.19G003300	13.1871	0.00266933	PF01263	Galactose mutarotase-like superfamily protein
Glyma.05G038800	13.1538	0.000497287	PF04006
Glyma.09G254700	13.15	0.00148567	PF02548	ketopantoate hydroxymethyltransferase 1
Glyma.10G066700	13.1071	0.00242499	PF00274	Aldolase superfamily protein
Glyma.13G037300	13.1	0.00210662	PF00929	Polynucleotidyl transferase, ribonuclease H-like superfamily protein
Glyma.01G167200	13.0167	0.00116469	PF05911	Plant protein of unknown function (DUF869)
Glyma.19G116000	12.9091	0.00466516	PF02163	Peptidase M50 family protein
Glyma.05G209600	12.8966	0.000594614	PF13639	RING/U-box superfamily protein
Glyma.15G119000	12.8889	0.00117634	PF13837	GT-2-like 1
Glyma.17G178800	12.8824	0.00262284	PF00069	sucrose nonfermenting 1(SNF1)-related protein kinase 2.3
Glyma.15G082800	12.775	0.00167471	PF04852	Protein of unknown function (DUF640)
Glyma.20G056500	12.7143	0.00294291	PF14648
Glyma.11G223900	12.6875	0.00410308	PF00854	Major facilitator superfamily protein
Glyma.17G216700	12.6667	0.000839812	PF02330	Mitochondrial glycoprotein family protein
Glyma.05G060600	12.625	0.0013848	PF08458,PF05703	Plant protein of unknown function (DUF828) with plant pleckstrin homology-like region
Glyma.19G012300	12.6053	0.000898116	PF01426,PF08711	BAH domain ;TFIIS helical bundle-like domain
Glyma.02G001700	12.566	0.000261481	PF04720	Protein of unknown function (DUF506)
Glyma.12G128900	12.517	0.00167148	PF07847	Protein of unknown function (DUF1637)
Glyma.10G047500	12.5	0.000779052	PF00481	Protein phosphatase 2C family protein
Glyma.13G243600	12.5	0.000914669	PF00097,PF00271,PF00176	SNF2 domain-containing protein / helicase domain-containing protein / zinc finger protein-related
Glyma.06G075900	12.5	0.0022922
Glyma.17G026500	12.5	0.00353336	PF05185	protein arginine methyltransferase 4A
Glyma.05G211600	12.4706	0.000489673	PF00403	Heavy metal transport/detoxification superfamily protein
Glyma.03G102000	12.4	0.000419061	PF12076	Fatty acid hydroxylase superfamily
Glyma.16G201200	12.4	0.000677024	PF00069	Protein kinase superfamily protein
Glyma.05G001900	12.35	0.000321821	PF00557	methionine aminopeptidase 2B
Glyma.20G058500	12.3333	0.00087171	PF09409,PF08325
Glyma.06G065900	12.2917	0.00377842		serine-rich protein-related
Glyma.08G049000	12.2	0.00235475	PF00512,PF02518,PF00072,PF03924	CHASE domain containing histidine kinase protein
Glyma.19G232300	12.1176	0.000685724	PF16891,PF00149	Calcineurin-like metallo-phosphoesterase superfamily protein
Glyma.09G199500	12.1	0.000739108	PF07093
Glyma.09G025000	12	0.00271034	PF05178,PF12936	KRR1 family protein
Glyma.04G240900	12	0.00399768	PF11942,PF03439,PF00467	global transcription factor group A2
Glyma.13G342400	12	0.00463662	PF00270,PF00271,PF07717,PF04408	RNA helicase family protein
Glyma.06G178000	11.9375	0.00488526	PF00564	Octicosapeptide/Phox/Bem1p family protein
Glyma.10G046400	11.9	0.00498517	PF16876,PF04571,PF08235	Lipin family protein
Glyma.09G089700	11.859	0.000791353	PF14531,PF03822	CBL-interacting protein kinase 23
Glyma.12G050200	11.8333	0.00425975	PF16021
Glyma.11G110400	11.75	0.00137953	PF00170	Basic-leucine zipper (bZIP) transcription factor family protein
Glyma.11G101900	11.7034	0.00208683	PF00690,PF00702,PF00122,PF00689	ATPase E1-E2 type family protein / haloacid dehalogenase-like hydrolase family protein
Glyma.11G243000	11.7	0.0012888	PF04724	beta-1,4-N-acetylglucosaminyltransferase family protein
Glyma.10G165600	11.7	0.00494955
Glyma.04G219200	11.6667	0.00146022	PF13238	shikimate kinase 1
Glyma.03G136000	11.6444	6.5e-05	PF13304,PF00005,PF12698	ATP-binding cassette A1
Glyma.17G160500	11.6129	0.00150902	PF00249,PF00538	Homeodomain-like/winged-helix DNA-binding family protein
Glyma.10G101400	11.5714	0.00116513	PF14369,PF13639	RING-H2 finger C1A
Glyma.18G053900	11.5455	0.00318828	PF04628	SNARE-like superfamily protein
Glyma.17G051400	11.5	0.00482997	PF02045	nuclear factor Y, subunit A8
Glyma.01G064900	11.4	8.34e-05		18S pre-ribosomal assembly protein gar2-related
Glyma.12G001300	11.3913	0.00385506	PF13923,PF00097,PF02182	Zinc finger (C3HC4-type RING finger) family protein
Glyma.13G330500	11.3462	0.000644103
Glyma.20G083700	11.3448	0.00018973
Glyma.05G032700	11.3333	0.00212696	PF14570	RING/U-box superfamily protein
Glyma.09G105300	11.3077	0.00286814	PF00271,PF00270	P-loop containing nucleoside triphosphate hydrolases superfamily protein
Glyma.02G181800	11.2857	0.00176579	PF01554	MATE efflux family protein
Glyma.10G142500	11.2585	0.000324808		neurofilament protein-related
Glyma.19G087600	11.25	0.00257617	PF13450	Flavin containing amine oxidoreductase family
Glyma.02G137800	11.25	0.00493066
Glyma.02G252900	11.1818	0.00207131	PF04788	Protein of unknown function (DUF620)
Glyma.02G071300	11.1667	0.00296816	PF04153,PF04065	transcription regulator NOT2/NOT3/NOT5 family protein
Glyma.01G155600	11.1667	0.00359803	PF07714,PF00139	Concanavalin A-like lectin protein kinase family protein
Glyma.04G003600	11.1364	0.00262805		SBP (S-ribonuclease binding protein) family protein
Glyma.16G003700	11.1111	0.00210522	PF00400,PF08145	Transducin/WD40 repeat-like superfamily protein
Glyma.10G171700	11	0.00368459	PF03372	Endonuclease/exonuclease/phosphatase family protein
Glyma.18G071500	10.875	0.00290838	PF11919,PF16507	proteasome activating protein 200
Glyma.04G086900	10.8333	0.00209572	PF00365	phosphofructokinase 3
Glyma.08G001000	10.8278	0.000323875	PF00586,PF02769	phosphoribosylformylglycinamidine cyclo-ligase, chloroplast / phosphoribosyl-aminoimidazole synthetase / AIR synthase (PUR5)
Glyma.16G129200	10.75	0.00247661
Glyma.03G127600	10.75	0.00302853	PF00170,PF14144	TGACG motif-binding factor 6
Glyma.10G149900	10.7083	0.000614841	PF12871,PF03371	PRP38 family protein
Glyma.17G125300	10.6271	0.00083676	PF00067	cytochrome P450, family 71, subfamily B, polypeptide 37
Glyma.20G177200	10.5102	0.0011662	PF12899	cytosolic invertase 2
Glyma.15G021100	10.5066	0.0018062		actin binding protein family
Glyma.13G151800	10.4037	0.00167765	PF00274	Aldolase superfamily protein
Glyma.20G244900	10.3889	0.00368068	PF14288,PF02364	glucan synthase-like 10
Glyma.11G175900	10.3333	0.000159269	PF00067	cytochrome P450, family 86, subfamily A, polypeptide 1
Glyma.06G135200	10.3333	0.00482447	PF07145,PF00076	CTC-interacting domain 11
Glyma.11G104000	10.2857	0.00360811		RING/U-box superfamily protein
Glyma.14G196400	10.2857	0.00382151	PF07767
Glyma.20G153400	10.2381	0.00412199	PF14226,PF03171	gibberellin 20 oxidase 2
Glyma.07G055200	10.2353	0.000637069	PF00010,PF14215	basic helix-loop-helix (bHLH) DNA-binding superfamily protein
Glyma.05G090000	10.1667	0.00370258	PF00035	double-stranded-RNA-binding protein 4
Glyma.08G082400	10.1556	0.00279513	PF03106	WRKY DNA-binding protein 28
Glyma.06G065100	10.0833	0.000396771
Glyma.15G220600	10.0588	0.00435478	PF07734,PF12937	F-box and associated interaction domains-containing protein
Glyma.13G351800	10	0.00152153		Protein phosphatase 2A, regulatory subunit PR55
Glyma.05G030800	10	0.00174468	PF06293,PF13499	calcium-dependent protein kinase 30
Glyma.02G274400	10	0.00190945	PF03168	Late embryogenesis abundant (LEA) hydroxyproline-rich glycoprotein family
Glyma.05G167300	10	0.0042851	PF07766	LETM1-like protein
Glyma.07G001800	9.9899	0.000278542	PF00153	Mitochondrial substrate carrier family protein
Glyma.09G081800	9.97143	0.0038677	PF00069	Protein kinase superfamily protein
Glyma.06G003500	9.925	0.000954528		SBP (S-ribonuclease binding protein) family protein
Glyma.15G053000	9.9	0.0016568		dentin sialophosphoprotein-related
Glyma.13G135800	9.86667	0.000737037	PF07714	Protein kinase superfamily protein
Glyma.07G160700	9.77647	0.00320832	PF00067	cytochrome P450, family 71, subfamily B, polypeptide 34
Glyma.17G187300	9.73077	0.00105955	PF07847	Protein of unknown function (DUF1637)
Glyma.20G189900	9.67857	0.00109509	PF09258	glycosyltransferase family protein 47
Glyma.02G311000	9.63636	0.00130961	PF00564,PF02042	Plant regulator RWP-RK family protein
Glyma.09G228000	9.63265	0.00071648	PF04862	Protein of unknown function, DUF642
Glyma.16G182500	9.6	0.00178696	PF12580,PF00082	tripeptidyl peptidase ii
Glyma.03G250400	9.6	0.00459209	PF13857,PF11904	Ankyrin repeat family protein
Glyma.03G246200	9.47368	0.000711861	PF13178,PF00612	IQ-domain 19
Glyma.16G057500	9.3494	0.00462985	PF03407
Glyma.20G178300	9.31111	0.00186567
Glyma.02G146600	9.22222	0.00207127	PF06047
Glyma.10G194500	9.04348	0.003979	PF00400,PF04564	Transducin/WD40 repeat-like superfamily protein
Glyma.06G162500	9.03846	0.00164958	PF00567,PF00565	TUDOR-SN protein 1
Glyma.06G208100	9	0.0021545	PF07847	Protein of unknown function (DUF1637)
Glyma.19G020000	8.93182	0.000357761	PF01145	SPFH/Band 7/PHB domain-containing membrane-associated protein family
Glyma.09G202300	8.82609	0.00213612	PF08263,PF11721,PF07714	Leucine-rich repeat protein kinase family protein
Glyma.05G150300	8.80952	0.00136098	PF04278	Tic22-like family protein
Glyma.01G133900	8.75	0.00306135	PF00134	cyclin p3;2
Glyma.13G115800	8.71429	0.000497581	PF16213,PF09324,PF12783,PF01369	HOPM interactor 7
Glyma.15G001400	8.67391	0.00116769	PF10250	O-fucosyltransferase family protein
Glyma.06G069500	8.65152	0.00230189	PF00153	Mitochondrial substrate carrier family protein
Glyma.18G059700	8.64865	0.00197883	PF07719,PF00515,PF13414	tetratricopeptide repeat (TPR)-containing protein
Glyma.07G089400	8.57143	0.00355283	PF04083	alpha/beta-Hydrolases superfamily protein
Glyma.17G242900	8.57143	0.00405418	PF04571,PF08235	phosphatidic acid phosphohydrolase 2
Glyma.18G274500	8.56667	0.00288823	PF00646	F-box family protein
Glyma.01G134200	8.44444	0.00325439	PF13912	C2H2-like zinc finger protein
Glyma.10G270800	8.42857	0.00311439	PF02358,PF00982	trehalose phosphatase/synthase 5
Glyma.15G008200	8.42857	0.0038472	PF01866	diphthamide synthesis DPH2 family protein
Glyma.15G192100	8.3871	0.00104027	PF03357	SNF7 family protein
Glyma.06G010400	8.36842	0.000824608	PF03765,PF00650	Sec14p-like phosphatidylinositol transfer family protein
Glyma.18G291500	8.36364	0.00252269	PF07983,PF00332	O-Glycosyl hydrolases family 17 protein
Glyma.16G177700	8.29412	0.00432213	PF00646,PF05641	F-box/RNI-like/FBD-like domains-containing protein
Glyma.10G023000	8.28571	0.00490331	PF00400	transducin family protein / WD-40 repeat family protein
Glyma.13G215900	8.27273	0.00231917	PF13892,PF09110,PF04851,PF00271,PF09111	chromatin remodeling factor17
Glyma.14G064800	8.26667	0.00239627	PF00025	RAB GTPase homolog A2B
Glyma.15G090500	8.14286	0.00421623
Glyma.16G048700	8.125	0.00189798	PF00097	RING/U-box superfamily protein
Glyma.18G080400	8.11538	0.000393191	PF00067	cytochrome P450, family 71, subfamily B, polypeptide 34
Glyma.13G102000	8.10606	0.00482662	PF10533,PF03106	WRKY DNA-binding protein 11
Glyma.05G020200	8.04348	0.0029341	PF00076,PF02136	Nuclear transport factor 2 (NTF2) family protein with RNA binding (RRM-RBD-RNP motifs) domain
Glyma.07G193800	7.93182	0.00292709	PF06749	Protein of unknown function (DUF1218)
Glyma.18G245500	7.92857	0.00436693
Glyma.19G152100	7.89474	0.00426321	PF07714	Protein kinase family protein
Glyma.09G259200	7.83333	0.00328949	PF12552,PF14309	Protein of unknown function (DUF3741)
Glyma.08G102100	7.79592	0.00467973	PF13561	NAD(P)-binding Rossmann-fold superfamily protein
Glyma.13G299100	7.74468	0.00360646	PF05623	Protein of unknown function (DUF789)
Glyma.08G037200	7.68824	0.00209988	PF00854	Major facilitator superfamily protein
Glyma.03G193800	7.65517	0.000685658	PF01156	uridine-ribohydrolase 1
Glyma.04G195700	7.63636	0.00333113	PF08238,PF01753	HCP-like superfamily protein with MYND-type zinc finger
Glyma.12G060200	7.63158	0.00110662	PF00249	Homeodomain-like superfamily protein
Glyma.07G036500	7.6087	0.000535785	PF13713,PF08381	DZC (Disease resistance/zinc finger/chromosome condensation-like region) domain containing protein
Glyma.19G028200	7.5	0.00378057	PF13881	membrane-anchored ubiquitin-fold protein 2
Glyma.08G196900	7.42857	0.00404674	PF07687,PF01546	peptidase M20/M25/M40 family protein
Glyma.07G126400	7.41935	0.000634757	PF00365	phosphofructokinase 3
Glyma.06G029100	7.32075	0.00495476	PF05920,PF07526	BEL1-like homeodomain 3
Glyma.11G132000	7.29167	0.0037348	PF01428,PF01754	A20/AN1-like zinc finger family protein
Glyma.01G215500	7.16667	0.00363538	PF01154,PF08540	hydroxymethylglutaryl-CoA synthase / HMG-CoA synthase / 3-hydroxy-3-methylglutaryl coenzyme A synthase
Glyma.09G061500	7.15873	0.00354737	PF13855	plant intracellular ras group-related LRR 6
Glyma.12G010800	7.13043	0.000831727	PF00642,PF00076	Zinc finger (CCCH-type) family protein / RNA recognition motif (RRM)-containing protein
Glyma.05G111500	7.07692	0.0041593	PF03479	Predicted AT-hook DNA-binding family protein
Glyma.05G155300	7	0.00260652	PF00149	protein phosphatase 2A-3
Glyma.01G075400	6.9	0.0038426	PF03144,PF00679,PF14492,PF03764	Translation elongation factor EFG/EF2 protein
Glyma.20G010100	6.88889	0.00437953	PF01535,PF13041	Tetratricopeptide repeat (TPR)-like superfamily protein
Glyma.10G293100	6.86957	0.00493423
Glyma.06G066200	6.83673	0.0024964	PF00400	TOPLESS-related 1
Glyma.10G138600	6.77778	0.00437377	PF13450	Flavin containing amine oxidoreductase family
Glyma.12G183800	6.76623	0.00255894	PF01428,PF01754	A20/AN1-like zinc finger family protein
Glyma.16G182300	6.75	0.00415758	PF00753,PF07521,PF10996,PF13299	cleavage and polyadenylation specificity factor 100
Glyma.05G160500	6.71111	0.00283961	PF07939
Glyma.18G101600	6.55556	0.00454573	PF00271,PF00270	DEA(D/H)-box RNA helicase family protein
Glyma.17G228800	6.3956	0.000787179	PF02347	glycine decarboxylase P-protein 2
Glyma.10G266600	6.375	0.00404252	PF13949,PF03097	Endosomal targeting BRO1-like domain-containing protein
Glyma.07G090800	6.2963	0.00495165
Glyma.07G058600	6.28571	0.00365649
Glyma.08G118200	6.26316	0.000418038	PF03106	WRKY DNA-binding protein 65
Glyma.02G280300	6.24615	0.00198422	PF00046	Homeodomain-like superfamily protein
Glyma.10G298700	6.15652	0.00146148	PF13837	Homeodomain-like superfamily protein
Glyma.19G228700	6.15	0.00163944	PF00582	Adenine nucleotide alpha hydrolases-like superfamily protein
Glyma.10G159800	6.12245	0.0019005	PF00291	cysteine synthase D1
Glyma.10G082800	6.12	0.00138702	PF02045	nuclear factor Y, subunit A10
Glyma.08G005600	5.88889	0.00369682	PF13499,PF07714	calcium-dependent protein kinase 4
Glyma.10G159200	5.85714	0.000873818	PF07714,PF14381	Protein kinase superfamily protein
Glyma.20G159000	5.85106	0.00103781		VASCULAR-RELATED NAC-DOMAIN 6
Glyma.01G208600	5.85	0.00373941	PF05641	G2484-1 protein
Glyma.20G144800	5.84615	0.00470937	PF13419	Haloacid dehalogenase-like hydrolase (HAD) superfamily protein
Glyma.05G053100	5.77778	0.00282824	PF00995	Sec1/munc18-like (SM) proteins superfamily
Glyma.18G033900	5.69136	0.000367933	PF07690	Major facilitator superfamily protein
Glyma.09G240100	5.66667	0.00305157	PF07847	Protein of unknown function (DUF1637)
Glyma.01G005000	5.65	0.000417245	PF00642	CCCH-type zinc finger family protein
Glyma.11G221100	5.64615	0.00313524	PF02769,PF13507	purine biosynthesis 4
Glyma.01G009600	5.51515	0.00499125	PF00249,PF14379	Homeodomain-like superfamily protein
Glyma.05G032200	5.41667	0.00185936	PF00249	Homeodomain-like superfamily protein
Glyma.19G115900	5.32934	0.000581355	PF00551	Formyl transferase
Glyma.13G024900	5.30547	0.000578625	PF08502	2-isopropylmalate synthase 1
Glyma.15G121400	5.29032	0.00452425	PF00348	farnesyl diphosphate synthase 1
Glyma.01G230900	5.24038	0.00349283	PF00034	cytochrome c-2
Glyma.17G248400	5.22581	0.000881503	PF07974,PF01457	metalloendopeptidases;zinc ion binding
Glyma.01G020100	5.21875	0.00237952	PF08263,PF11721,PF07714	Leucine-rich repeat protein kinase family protein
Glyma.14G221800	5.19101	0.00175567	PF13639	RING/U-box superfamily protein
Glyma.10G014700	5.125	0.00367884	PF13098,PF07749	thioredoxin family protein
Glyma.13G125700	5.08333	0.00496524	PF02115	Immunoglobulin E-set superfamily protein
Glyma.09G285900	4.95604	0.000583402	PF01156	uridine-ribohydrolase 2
Glyma.17G216600	4.92308	0.00261496	PF05903	PPPDE putative thiol peptidase family protein
Glyma.02G152600	4.84314	0.00456146	PF07765	Kinase interacting (KIP1-like) family protein
Glyma.12G172800	4.82609	0.00490031	PF13899,PF13848,PF00085	PDI-like 1-4
Glyma.05G158100	4.82222	0.000413637	PF00244	general regulatory factor 9
Glyma.11G066300	4.78333	0.00130646	PF07690	Major facilitator superfamily protein
Glyma.11G093500	4.73684	0.00161596	PF11891	Protein of unknown function (DUF3411)
Glyma.13G363800	4.73469	0.00010778	PF06232	Embryo-specific protein 3, (ATS3)
Glyma.05G060300	4.65789	0.00228261	PF05641	G2484-1 protein
Glyma.13G274100	4.625	0.00208144	PF00847	ethylene responsive element binding factor 4
Glyma.11G035700	4.58824	0.00256323	PF14226	2-oxoglutarate (2OG) and Fe(II)-dependent oxygenase superfamily protein
Glyma.13G281400	4.57895	0.00379047	PF01412	ARF-GAP domain 5
Glyma.03G092700	4.56021	0.00473043	PF00044,PF02800	glyceraldehyde-3-phosphate dehydrogenase of plastid 2
Glyma.12G168500	4.5	0.0020047	PF00584	secE/sec61-gamma protein transport protein
Glyma.17G221800	4.44186	0.0049102		DnaJ/Hsp40 cysteine-rich domain superfamily protein
Glyma.11G066100	4.43396	0.00282999	PF07690	Major facilitator superfamily protein
Glyma.12G027400	4.37391	0.00207517	PF00076	nucleolin like 2
Glyma.19G249500	4.32609	0.00117051	PF08536	WHIRLY 2
Glyma.03G263200	4.28	0.00429321	PF00806	pumilio 23
Glyma.19G109100	4.25714	0.00199198	PF02365	Arabidopsis NAC domain containing protein 87
Glyma.14G179800	4.24324	0.001572
Glyma.12G040200	4.2381	0.00486597	PF08156,PF01798	NOP56-like pre RNA processing ribonucleoprotein
Glyma.06G320100	4.1875	0.00394047	PF07719,PF13414	peroxin 5
Glyma.15G027800	4.06061	0.00481232		peroxin 13
Glyma.11G071900	4	0.00371856	PF03765,PF00650	SEC14-like 12
Glyma.18G289800	3.94958	0.00154749	PF04535	Uncharacterised protein family (UPF0497)
Glyma.07G052400	3.78125	0.0037946	PF00173	cytochrome B5 isoform E
Glyma.03G206400	3.75	0.00331858	PF01399,PF05470	eukaryotic translation initiation factor 3C
Glyma.20G022900	3.71111	0.00166387	PF16488,PF08699,PF16486,PF02170,PF02171	Argonaute family protein
Glyma.08G016900	3.69811	0.00121866	PF05920,PF07526	POX (plant homeobox) family protein
Glyma.13G064300	3.48936	0.00335829	PF07847	Protein of unknown function (DUF1637)
Glyma.14G062500	3.42748	0.00367526	PF08328,PF00206	L-Aspartase-like family protein
Glyma.03G180500	3.40964	0.000775598	PF13920	RING/U-box superfamily protein
Glyma.17G234000	3.18919	0.0043662
Glyma.02G204500	2.89198	0.00222209	PF02298	early nodulin-like protein 10
Glyma.08G043500	2.67147	0.0013349	PF04749	PLANT CADMIUM RESISTANCE 2
Glyma.18G301900	2.60714	0.00340709	PF10601
Glyma.02G210600	2.48485	0.00370651	PF13639	RING/U-box superfamily protein
Glyma.15G263100	2.27521	0.00368969	PF00478	Aldolase-type TIM barrel family protein
Glyma.06G065600	2.25203	0.000340308	PF01145	SPFH/Band 7/PHB domain-containing membrane-associated protein family
Glyma.01G128000	2.2128	0.000458114	PF04535	Uncharacterised protein family (UPF0497)
Glyma.15G260900	1.9503	0.00148031	PF02451
Glyma.12G188200	-2.15888	0.0041412	PF00850	histone deacetylase 8
Glyma.08G108000	-2.22571	0.000373353	PF05694	selenium-binding protein 1
Glyma.09G187000	-2.57732	0.00274736	PF04749	PLAC8 family protein
Glyma.08G076500	-2.82582	9.8e-05
Glyma.11G215500	-2.98895	0.00265895	PF03951,PF00120	glutamine synthase clone R1
Glyma.13G138600	-3.4	0.00308684	PF11976	ubiquitin 4
Glyma.05G046300	-3.54545	0.00329153	PF05191,PF00406	adenylate kinase 1
Glyma.12G222000	-4.0625	0.00255645	PF06749	Protein of unknown function (DUF1218)
Glyma.18G164200	-4.12577	0.000705764	PF04419	Uncharacterised protein family SERF
Glyma.05G121700	-4.55486	0.00302131
Glyma.01G122500	-4.92453	0.000639526
Glyma.08G022500	-5.09524	0.00468764	PF00334	Nucleoside diphosphate kinase family protein
Glyma.13G364400	-6.86338	0.00455707	PF02451
Glyma.14G205700	-7.11538	0.0038573	PF00179	ubiquitin conjugating enzyme 8
Glyma.12G218600	-7.42857	0.000488966
Glyma.10G001700	-7.6	0.00375268	PF03822,PF00069	CBL-interacting protein kinase 7
Glyma.18G009700	-8.38095	0.0045003	PF00044,PF02800	glyceraldehyde-3-phosphate dehydrogenase C subunit 1
Glyma.06G094400	-8.46154	0.00250502	PF00244	G-box regulating factor 6
Glyma.18G299700	-9.70588	0.00291802	PF00463	Phosphoenolpyruvate carboxylase family protein
Glyma.12G159300	-9.75	0.00366022	PF00056,PF02866	Lactate/malate dehydrogenase family protein
Glyma.20G025000	-11.5882	0.00225518		Uncharacterised conserved protein UCP022280
Glyma.13G308300	-12.1111	0.00487291
Glyma.15G045000	-12.5876	1.6e-05	PF02451
Glyma.07G032800	-13.5227	0.00384132	PF01215	Rubredoxin-like superfamily protein
Glyma.19G074000	-14.2923	0.000941169	PF02451
Glyma.16G146300	-15.5	0.00447335
Glyma.13G328800	-15.6316	0.00189281	PF02451
Glyma.11G133600	-15.7143	0.00403349	PF06858,PF08155	Nucleolar GTP-binding protein
Glyma.05G035600	-16.2	0.00346175	PF04588	hypoxia-responsive family protein / zinc finger (C3HC4-type RING finger) family protein
Glyma.U032500	-16.8448	0.00371048	PF01014	uricase / urate oxidase / nodulin 35, putative
Glyma.09G260500	-17.5	0.00403114	PF00228
Glyma.20G155900	-18.1667	0.0035511	PF01192	RNA polymerase Rpb6
Glyma.10G132500	-18.3333	0.00363035	PF14368	Bifunctional inhibitor/lipid-transfer protein/seed storage 2S albumin superfamily protein
Glyma.19G051900	-18.9474	0.000553661	PF03947	ribosomal protein L2
Glyma.03G164800	-20	0.00267361	PF03357	vacuolar protein sorting-associated protein 2.3
Glyma.10G121000	-20.2	0.00347319	PF14368	Bifunctional inhibitor/lipid-transfer protein/seed storage 2S albumin superfamily protein
Glyma.05G154700	-20.25	0.00467189	PF04398	Protein of unknown function, DUF538
Glyma.09G283500	-22.5385	0.00456945	PF12656	D111/G-patch domain-containing protein
LGB1	-23.4965	8.25e-05	PF00042	NON-SYMBIOTIC HEMOGLOBIN 2
Glyma.02G259700	-23.7222	0.00168732	PF04588	Hypoxia-responsive family protein
Glyma.20G191200	-24.8688	0.000190012	PF00042	haemoglobin 2
Glyma.04G238800	-25.2857	0.00142152	PF00179	ubiquitin conjugating enzyme 9
Glyma.10G277900	-25.7727	0.00270116		F1F0-ATPase inhibitor protein, putative
Glyma.15G100300	-29.75	0.00487719	PF15365
Glyma.17G083400	-31	0.00484167	PF04371	porphyromonas-type peptidyl-arginine deiminase family protein
Glyma.05G134900	-32.8333	0.00259973
Glyma.15G266100	-33.5	0.0041506	PF14365,PF03080	Protein of Unknown Function (DUF239)
Glyma.15G071900	-33.8	0.00200197	PF12838	Alpha-helical ferredoxin
LBA	-36.5242	0.00083249	PF00042	Leghemoglobin A
Glyma.19G147400	-37.5	0.00450756	PF11960,PF00487	fatty acid desaturase 2
Glyma.15G091400	-39.8571	0.00222182	PF00240	ubiquitin-like protein 5
Glyma.17G185500	-39.8837	0.00483487	PF00338	ribosomal protein S10
Glyma.15G006400	-41	0.00138208	PF01257	NADH-ubiquinone oxidoreductase 24 kDa subunit, putative
Glyma.20G024200	-41.0702	0.000586004	PF02451
Glyma.05G214600	-41.7143	0.00316721
Glyma.13G329900	-43	0.00488254
Glyma.03G230600	-43.25	0.00177405	PF04398	Protein of unknown function, DUF538
Glyma.10G012800	-45.8	0.000638597		Cytochrome c oxidase subunit Vc family protein
Glyma.10G199000	-45.8498	0.000161837	PF00042	haemoglobin 2
Glyma.18G102700	-46.5	0.00410033	PF00892	glucose 6-phosphate/phosphate translocator 1
Glyma.05G204400	-47.4545	0.00398536	PF11820	Protein of unknown function (DUF 3339)
Glyma.13G170200	-57	0.00329824
Glyma.09G164900	-64	0.00328813	PF00549,PF02629	Succinyl-CoA ligase, alpha subunit
Glyma.01G192000	-69	0.00268569	PF04419,PF12907	Uncharacterised protein family SERF
Glyma.20G195100	-71	0.00232187	PF14144	TGACG motif-binding factor 4
Glyma.16G106300	-72	0.00256273	PF01294	breast basic conserved 1
Glyma.06G002700	-75	0.00109847
Glyma.08G155200	-80	0.00259603	PF00213	delta subunit of Mt ATP synthase
Glyma.07G257700	-94	0.00156269	PF13537	Aluminium induced protein with YGL and LRDR motifs
Glyma.13G193600	-116	0.00175065	PF13233	LYR family of Fe/S cluster biogenesis protein
Glyma.03G172500	-125	0.00373908	PF00125	Histone superfamily protein
Glyma.12G135000	-128	0.000281944	PF01946	thiazole biosynthetic enzyme, chloroplast (ARA6) (THI1) (THI4)
Glyma.02G174400	-183	0.000286075	PF10183
Glyma.06G079200	-276	0.000843068	PF02519	SAUR-like auxin-responsive protein family
Glyma.01G028500	-821	6.04e-05

## Sheet: DEG_GvsH
Gene ID	norm_fold Change	pvalue	PFAM annotation	Annotation
Glyma.18G274400	5985	0.00181149	PF00201	UDP-Glycosyltransferase superfamily protein
Glyma.12G052700	1183	0.000153168		ARM repeat superfamily protein
Glyma.14G148700	977	0.000535995		P-loop containing nucleoside triphosphate hydrolases superfamily protein
Glyma.07G136500	865	0.00954381	PF00415	Regulator of chromosome condensation (RCC1) family protein
Glyma.07G128700	815.8	6.21e-05		effector of transcription2
Glyma.04G057400	676	0.000656305	PF02170,PF04851,PF00271,PF03368,PF00636	dicer-like 3
Glyma.19G120400	597	0.0113615	PF08502,PF00682	2-isopropylmalate synthase 1
Glyma.02G033600	593	0.00438338	PF02705	K+ uptake permease 6
Glyma.01G186000	527	0.00228709	PF09750
Glyma.14G130700	510	0.00646107	PF13639,PF05495,PF14599	CHY-type/CTCHY-type/RING-type Zinc finger protein
Glyma.05G146400	503.889	0.000129082	PF16923,PF03200	glucosidase 1
Glyma.11G029300	496	0.000745027
Glyma.14G129100	419	0.00316023	PF13639	RING/U-box superfamily protein
Glyma.07G036300	417	0.00446	PF14438,PF06741	CTC-interacting domain 4
Glyma.08G258500	412.667	0.00119956	PF13831,PF05965,PF05964,PF00856,PF00855,PF13771	trithorax-like protein 2
Glyma.05G076800	402	0.00921729		plastid transcriptionally active 9
Glyma.01G077200	401	0.000760183	PF00867,PF00752	5'-3' exonuclease family protein
Glyma.19G041700	396	0.000209981	PF14416,PF13839	TRICHOME BIREFRINGENCE-LIKE 19
Glyma.14G143000	395	0.00021674	PF00790	ENTH/VHS/GAT family protein
Glyma.15G071600	388	0.000352204	PF04046,PF04037	proline-rich spliceosome-associated (PSP) family protein
Glyma.08G218200	383	0.000187016	PF01566	NRAMP metal ion transporter 6
Glyma.04G117400	325.5	0.00038142	PF01432	Zincin-like metalloproteases family protein
Glyma.06G127400	325	0.00222283	PF14691,PF07992,PF01493,PF04898,PF01645,PF00310	NADH-dependent glutamate synthase 1
Glyma.13G353200	321	0.000279402		actin binding protein family
Glyma.09G175800	317	0.00841555	PF01798,PF13041	NOP56-like pre RNA processing ribonucleoprotein
Glyma.19G067100	312	0.000251021	PF03219	TLC ATP/ADP transporter
Glyma.20G227200	308.5	0.00622435	PF04851,PF00271	P-loop containing nucleoside triphosphate hydrolases superfamily protein
Glyma.20G241400	308	0.00025107
Glyma.02G267800	306	0.00864121	PF00097,PF00400	Transducin/WD40 repeat-like superfamily protein
Glyma.13G224300	306	0.0306963	PF07714	Protein kinase superfamily protein
Glyma.16G072600	291	0.0103207
Glyma.01G031400	286	0.000282828	PF00076,PF01480	splicing factor PWI domain-containing protein / RNA recognition motif (RRM)-containing protein
Glyma.09G083800	284	0.000470325	PF07928	VPS54
Glyma.03G227600	282	0.00855282	PF03283	Pectinacetylesterase family protein
Glyma.10G047800	278.308	0.000534987	PF00566	Ypt/Rab-GAP domain of gyp1p superfamily protein
Glyma.14G142100	269	0.000300215	PF04258	signal peptide peptidase
Glyma.20G086700	267	0.000747586	PF00917	TRAF-like superfamily protein
Glyma.20G160900	260	0.00336956	PF04564,PF07714	U-box domain-containing protein kinase family protein
Glyma.20G054600	254	0.00232369	PF00443,PF14533,PF12436	ubiquitin-specific protease 13
Glyma.17G133000	243.5	0.00742549	PF00400	FIZZY-related 2
Glyma.07G062900	231	0.00612313	PF00931	NB-ARC domain-containing disease resistance protein
Glyma.17G244600	222	0.0145515	PF00149	Calcineurin-like metallo-phosphoesterase superfamily protein
Glyma.01G187200	214.5	0.000925503		PLC-like phosphodiesterases superfamily protein
Glyma.02G221600	209	0.000247655	PF05978	Major facilitator superfamily protein
Glyma.13G027800	208.333	3.83e-05	PF00443,PF14533,PF12436	ubiquitin-specific protease 13
Glyma.02G102700	205	0.00208921		PLC-like phosphodiesterases superfamily protein
Glyma.20G031800	201	0.026588	PF11265	phytochrome and flowering time regulatory protein (PFT1)
Glyma.16G085100	199.333	0.000358848	PF13414	carboxyl terminus of HSC70-interacting protein
Glyma.07G207700	195	0.000618594	PF00168,PF02893,PF16016	C2 domain-containing protein / GRAM domain-containing protein
Glyma.18G147700	193	0.00113139	PF00860	Xanthine/uracil permease family protein
Glyma.13G330600	191.5	0.00601369	PF00225	P-loop containing nucleoside triphosphate hydrolases superfamily protein
Glyma.06G201700	189	0.000874778	PF00271,PF04408,PF07717	RNA helicase family protein
Glyma.09G120600	188.833	0.00219402	PF07651	ENTH/ANTH/VHS superfamily protein
Glyma.15G138800	188.556	0.00366511	PF00400	Transducin/WD40 repeat-like superfamily protein
Glyma.11G237700	187	0.000897326	PF00136,PF03104,PF08490	DNA polymerase epsilon catalytic subunit
Glyma.06G003000	186.667	0.000455319		ARM repeat superfamily protein
Glyma.16G154800	185.5	0.00143651
Glyma.07G034600	185	0.000676508	PF09405	CASC3/Barentsz eIF4AIII binding
Glyma.05G215100	185	0.00168614	PF07765	myosin heavy chain-related
Glyma.12G196000	179.5	0.000419356	PF03124	EXS (ERD1/XPR1/SYG1) family protein
Glyma.08G300800	178.667	0.0185315	PF02517	CAAX amino terminal protease family protein
Glyma.17G070500	177.5	0.0272276	PF01536	S-adenosylmethionine decarboxylase
Glyma.12G098800	176	0.0132448	PF00899	NAD(P)-binding Rossmann-fold superfamily protein
Glyma.01G093900	175	0.000580386		ARM repeat superfamily protein
Glyma.09G031600	173.5	0.0110872	PF13229	Pectin lyase-like superfamily protein
Glyma.04G096300	173	0.00664689	PF06200,PF00320,PF06203	ZIM-like 1
Glyma.08G237500	168	0.00229361	PF07724,PF01434	FTSH protease 12
Glyma.14G122200	166	0.000960427	PF00450	serine carboxypeptidase-like 42
Glyma.02G310900	166	0.00171727	PF16414,PF02460	Patched family protein
Glyma.01G121400	162	0.00813456	PF11935,PF12295	HEAT repeat-containing protein
Glyma.13G182600	160.333	0.000450704	PF04046,PF04037	proline-rich spliceosome-associated (PSP) family protein
Glyma.20G218800	160	0.000741288	PF14237,PF00076	RNA binding (RRM/RBD/RNP motifs) family protein
Glyma.17G060400	156.9	0.000172426	PF12710,PF00122	heavy metal atpase 2
Glyma.09G115600	152	0.00517331	PF00270,PF00035,PF00271,PF07717,PF04408	DEA(D/H)-box RNA helicase family protein
Glyma.12G155900	152	0.0266389	PF00560,PF13855,PF11721,PF07714	Leucine-rich repeat transmembrane protein kinase
Glyma.07G125300	148.5	0.000590301	PF04567,PF04565,PF04566,PF04561,PF04560,PF04563,PF00562	nuclear RNA polymerase C2
Glyma.16G144200	148	0.00127577	PF06650	Protein of unknown function (DUF1162)
Glyma.20G170000	148	0.00869715		gigantea protein (GI)
Glyma.07G233100	146.6	0.000220304	PF16909,PF06650,PF06101,PF12624,PF16910,PF16908	calcium-dependent lipid-binding family protein
Glyma.14G010300	146	0.00177667	PF03222	amino acid permease 7
Glyma.17G095800	146	0.00199159	PF00443,PF04781,PF04780	Ubiquitin carboxyl-terminal hydrolase-related protein
Glyma.12G059700	144	0.00341679	PF01480	splicing factor PWI domain-containing protein
Glyma.17G255500	143	0.000786713	PF13450,PF04433	LSD1-like 3
Glyma.20G071200	142	0.0039563	PF13423,PF14533,PF12436	ubiquitin-specific protease 13
Glyma.17G165900	141	0.00104463	PF08513,PF00400	WD-40 repeat family protein
Glyma.08G102200	139.5	0.0144474
Glyma.09G112200	138	0.00219634	PF04851,PF07529,PF00271	SNF2 domain-containing protein / helicase domain-containing protein
Glyma.19G065600	136.6	8.86e-05	PF14691,PF07992,PF01493,PF04898,PF00310,PF01645	NADH-dependent glutamate synthase 1
Glyma.05G085400	135.4	0.00392206	PF00225	P-loop containing nucleoside triphosphate hydrolases superfamily protein
Glyma.09G064100	131	0.000914979
Glyma.12G157700	131	0.00223625	PF00645,PF08645	phosphoesterase
Glyma.07G113100	130.905	0.000759229	PF03547	Auxin efflux carrier family protein
Glyma.15G246800	130	0.000368383	PF00931	NB-ARC domain-containing disease resistance protein
Glyma.01G031800	129.5	6.47e-05	PF02705	K+ uptake permease 6
Glyma.13G183900	129.5	0.000869667	PF13923,PF00271,PF00176	SNF2 domain-containing protein / helicase domain-containing protein / zinc finger protein-related
Glyma.20G024500	129	0.00137417	PF13015,PF12999	calmodulin-binding protein
Glyma.03G132500	129	0.0286473		Eukaryotic translation initiation factor eIF2A family protein
Glyma.06G240500	128.5	0.000491566		proton pump interactor 1
Glyma.13G241800	128.333	0.000745705	PF04046,PF04037	proline-rich spliceosome-associated (PSP) family protein
Glyma.15G036700	128	0.0060861	PF03152	Ubiquitin fusion degradation UFD1 family protein
Glyma.06G032500	128	0.00808175	PF00342	Sugar isomerase (SIS) family protein
Glyma.07G000400	126	0.001188	PF00569,PF00628,PF02135,PF08214	histone acetyltransferase of the CBP family 12
Glyma.11G196900	126	0.00133796		ATP-dependent helicase family protein
Glyma.17G197200	126	0.00549486
Glyma.10G091000	126	0.0149891	PF12971,PF12972,PF05089	alpha-N-acetylglucosaminidase family / NAGLU family
Glyma.08G281400	125	0.00373908	PF02893	GRAM domain family protein
Glyma.16G074300	125	0.0121194	PF00069	Protein kinase superfamily protein
Glyma.06G001900	123	0.00117384	PF00318,PF01704	UDP-GLUCOSE PYROPHOSPHORYLASE 1
Glyma.15G049000	122	0.0162261	PF00170	Basic-leucine zipper (bZIP) transcription factor family protein
Glyma.07G249800	121	0.00120441	PF06584	DNA binding
Glyma.06G158200	119.714	0.0049472	PF00564,PF00571	CBS / octicosapeptide/Phox/Bemp1 (PB1) domains-containing protein
Glyma.13G109600	119.333	0.000928618	PF03456,PF02141	DENN (AEX-3) domain-containing protein
Glyma.19G095000	118.333	0.00429135
Glyma.06G070300	118	0.00469831	PF00160	Cyclophilin-like peptidyl-prolyl cis-trans isomerase family protein
Glyma.18G173600	117.333	0.000393268
Glyma.05G185300	117	0.00839526	PF14649
Glyma.20G135800	116.5	8.03e-05	PF00397,PF01846	pre-mRNA-processing protein 40B
Glyma.18G216100	115.333	0.000193049		Mitochondrial ATP synthase D chain-related protein
Glyma.07G149900	115	0.0196122	PF04791	LMBR1-like membrane protein
Glyma.14G129500	114	0.00139883		embryo defective 2410
Glyma.06G008300	114	0.00168539	PF02201,PF02213,PF03126	nucleic acid binding;zinc ion binding;DNA binding
Glyma.17G169400	114	0.0308808	PF00225	P-loop containing nucleoside triphosphate hydrolases superfamily protein
Glyma.20G144400	113	0.00151201		time for coffee
Glyma.14G149300	113	0.00395727	PF13414	Tetratricopeptide repeat (TPR)-like superfamily protein
Glyma.07G063100	113	0.00665188		Disease resistance protein (CC-NBS-LRR class) family
Glyma.08G206200	113	0.0136292
Glyma.13G080100	113	0.0223016	PF16546,PF13414	Tetratricopeptide repeat (TPR)-like superfamily protein
Glyma.U029000	112.5	0.00354533	PF00397,PF01846	pre-mRNA-processing protein 40A
Glyma.16G128000	111.667	0.00691587	PF01582,PF00931	disease resistance protein (TIR-NBS-LRR class), putative
Glyma.04G020100	111.625	0.00351894	PF07714	ACT-like protein tyrosine kinase family protein
Glyma.03G024000	111	0.00110026	PF00270,PF07717,PF00271,PF04408	RNA helicase family protein
Glyma.08G162300	110.5	0.0132752	PF07926	nuclear pore anchor
Glyma.12G237400	108.5	0.00258238	PF01554	MATE efflux family protein
Glyma.06G202500	108.5	0.00673734	PF00271,PF00270,PF02889	U5 small nuclear ribonucleoprotein helicase
Glyma.20G017000	108	0.00412828	PF13207,PF00485	P-loop containing nucleoside triphosphate hydrolases superfamily protein
Glyma.15G176400	107	0.00452268	PF13371,PF13424,PF13414,PF00515	binding
Glyma.12G224600	106.5	0.000125469	PF00069,PF00400	SPA1-related 3
Glyma.06G092100	105.667	0.00015844	PF00300	Phosphoglycerate mutase family protein
Glyma.10G123400	104	0.0115251	PF00004	P-loop containing nucleoside triphosphate hydrolases superfamily protein
Glyma.10G133700	102.5	0.000616656	PF00400,PF08606	MOS4-associated complex 3B
Glyma.08G253800	102	0.00150144	PF14700,PF00940	DNA/RNA polymerases superfamily protein
Glyma.01G174500	100.2	0.00195641		Major facilitator superfamily protein
Glyma.06G309600	100	0.00174494	PF10539	DCD (Development and Cell Death) domain protein
Glyma.11G074600	100	0.00830787	PF02213,PF02201,PF03126	DNA binding;zinc ion binding;nucleic acid binding;nucleic acid binding
Glyma.05G089300	100	0.00966948	PF08066,PF00570,PF01612	Polynucleotidyl transferase, ribonuclease H fold protein with HRDC domain
Glyma.11G078300	99.5	0.0221239	PF00512,PF02518,PF00072	histidine kinase 1
Glyma.17G233000	99	0.000796274	PF00397,PF01846	pre-mRNA-processing protein 40A
Glyma.17G095900	99	0.00309468
Glyma.13G057300	99	0.0106482	PF12765,PF12830	PHD finger family protein
Glyma.16G088700	98.5	0.00222432	PF00069	Protein kinase superfamily protein
Glyma.02G060000	97.8333	0.000543607	PF05920,PF07526	BEL1-like homeodomain 2
Glyma.02G049800	97.5	0.000638032	PF00076	RNA-binding (RRM/RBD/RNP motifs) family protein
Glyma.08G063200	97.5	0.00615568	PF01063	branched-chain amino acid transaminase 2
Glyma.18G048900	96	7.41e-05	PF16124,PF00570,PF14493,PF00271,PF00270,PF09382	RECQ helicase SIM
Glyma.05G109300	96	0.00533111		little nuclei4
Glyma.15G048700	94.5	0.00868802	PF04696	protein-protein interaction regulator family protein
Glyma.15G263400	94	0.00685236	PF03381	LEM3 (ligand-effect modulator 3) family protein / CDC50 family protein
Glyma.10G135700	94	0.0115419	PF12708	Pectin lyase-like superfamily protein
Glyma.10G269700	94	0.0257664	PF00324	bidirectional amino acid transporter 1
Glyma.02G061900	94	0.028354		Protein of unknown function (DUF1162)
Glyma.13G130000	93	0.00916529	PF12755,PF02985,PF12348	CLIP-associated protein
Glyma.01G006100	93	0.0204194	PF03485,PF05746,PF00750	Arginyl-tRNA synthetase, class Ic
Glyma.14G033600	92.5	0.00768816	PF04851,PF13907,PF00385,PF00271	chromatin remodeling 5
Glyma.19G130100	92.3333	0.000537218	PF07058	microtubule-associated proteins 70-1
Glyma.08G012000	92	0.0059215	PF01429	methyl-CPG-binding domain protein 13
Glyma.05G030900	92	0.021283	PF01535,PF13041	Pentatricopeptide repeat (PPR) superfamily protein
Glyma.08G252600	91	0.00333001	PF00569,PF13764	auxin transport protein (BIG)
Glyma.17G050100	90.3636	0.00167383	PF03456,PF02141	DENN (AEX-3) domain-containing protein
Glyma.07G218600	90.3333	0.000147256	PF00485	P-loop containing nucleoside triphosphate hydrolases superfamily protein
Glyma.18G099000	90.3333	0.000594538	PF14438
Glyma.13G030600	90.3333	0.00133398	PF00225	P-loop containing nucleoside triphosphate hydrolases superfamily protein
Glyma.17G072000	90.1429	4.33e-05	PF04484	Family of unknown function (DUF566)
Glyma.01G099700	90	0.0018321	PF00156	uracil phosphoribosyltransferase
Glyma.02G044200	89.8235	0.00216765	PF03171	2-oxoglutarate (2OG) and Fe(II)-dependent oxygenase superfamily protein
Glyma.16G154400	89	0.00576968	PF01585,PF12457,PF07842	GC-rich sequence DNA-binding factor-like protein with Tuftelin interacting domain
Glyma.06G311100	87.8333	0.000212558	PF00931	NB-ARC domain-containing disease resistance protein
Glyma.08G131800	87	0.00183909		chloroplast sensor kinase
Glyma.18G137700	86.75	0.000596321	PF02902	UB-like protease 1D
Glyma.02G281000	86.6667	0.00718306	PF04851,PF13907,PF00385,PF00271	chromatin remodeling 5
Glyma.09G261200	86	0.00081608	PF06398,PF00168	C2 calcium/lipid-binding plant phosphoribosyltransferase family protein
Glyma.13G319300	86	0.00197894	PF02493	MORN (Membrane Occupation and Recognition Nexus) repeat-containing protein
Glyma.15G046400	85	0.00155171	PF02493,PF01504	Phosphatidylinositol-4-phosphate 5-kinase family protein
Glyma.19G249900	85	0.00215453	PF12074,PF13646	ILITYHIA
Glyma.05G042700	85	0.00253211	PF07714	FUS3-complementing gene 2
Glyma.09G000100	83.6667	0.000631312	PF06978	ribonuclease Ps
Glyma.19G068800	83.5	0.00334343	PF10497,PF02373	Transcription factor jumonji (jmjC) domain-containing protein
Glyma.19G121100	83.5	0.0127525	PF04818	ENTH/VHS family protein
Glyma.10G168700	83	0.00846332	PF13424,PF13414,PF00515,PF13844	Tetratricopeptide repeat (TPR)-like superfamily protein
Glyma.11G224400	82.3265	0.00172673	PF00854	Major facilitator superfamily protein
Glyma.17G003700	82	0.029748	PF12695	alpha/beta-Hydrolases superfamily protein
Glyma.07G020600	81.5833	0.000725978	PF13883	Pyridoxamine 5'-phosphate oxidase family protein
Glyma.01G086600	81.5	0.0114591	PF11265	phytochrome and flowering time regulatory protein (PFT1)
Glyma.11G160300	81	0.000930241	PF05193,PF00675,PF16187	Insulinase (Peptidase family M16) family protein
Glyma.03G224700	81	0.0288721	PF03106	WRKY family transcription factor
Glyma.12G108200	80.6471	0.000592498	PF04144	secretory carrier 3
Glyma.18G264600	80	0.0171118	PF13881	membrane-anchored ubiquitin-fold protein 2
Glyma.13G175200	78	0.00328274	PF15612,PF15613,PF15614,PF05066,PF00046,PF02791	homeobox-1
Glyma.14G155900	78	0.0111504		Zinc finger C-x8-C-x5-C-x3-H type family protein
Glyma.10G163700	77	0.000237139	PF13535,PF00731	phosphoribosylaminoimidazole carboxylase, putative / AIR carboxylase, putative
Glyma.14G135900	77	0.0137517
Glyma.12G175400	77	0.0198773	PF00271	ATP-dependent helicase family protein
Glyma.10G209100	76.8333	0.00406474	PF02338	Cysteine proteinases superfamily protein
Glyma.08G265300	76.5	0.00129048	PF04818,PF08312,PF00076,PF01805	RNA recognition motif (RRM)-containing protein
Glyma.04G096100	76	0.00225585	PF13385,PF00400,PF16057,PF14844,PF15787,PF02138	binding
Glyma.07G223700	76	0.0191102	PF00134	Cyclin family protein
Glyma.14G064900	75	0.00064026	PF00153	Mitochondrial substrate carrier family protein
Glyma.05G031900	75	0.0212333	PF08389	ARM repeat superfamily protein
Glyma.06G122500	75	0.0243536	PF11942,PF03439,PF00467	global transcription factor group A2
Glyma.U008400	74.5	0.0130729	PF04564	carboxyl terminus of HSC70-interacting protein
Glyma.06G098300	74.3333	0.000413917	PF10347,PF10351	Golgi-body localisation protein domain ;RNA pol II promoter Fmp27 protein domain
Glyma.10G118800	74	0.0041522	PF09733	VEFS-Box of polycomb protein
Glyma.16G107600	74	0.0473716	PF03283	Pectinacetylesterase family protein
Glyma.10G263700	73.5	0.00220764		PTEN 2
Glyma.14G152100	73.5	0.00802255	PF00171	aldehyde dehydrogenase 3H1
Glyma.09G196800	72.5	0.00142122	PF03094	Seven transmembrane MLO family protein
Glyma.07G170200	72.3333	0.00550251	PF13639	Zinc finger, C3HC4 type (RING finger) family protein
Glyma.08G227900	72	5.52e-05
Glyma.19G263900	72	0.00252955	PF04182	B-block binding subunit of TFIIIC
Glyma.17G090200	72	0.0026727	PF13639	SUGAR-INSENSITIVE 3
Glyma.07G084900	71	0.00221111	PF14309
Glyma.15G137000	71	0.00610864	PF00632	ubiquitin protein ligase 6
Glyma.10G041700	70.5	0.000438232	PF02736,PF00612,PF01843,PF00063	myosin 2
Glyma.18G266900	70	0.00182979	PF03639	glycosyl hydrolase family 81 protein
Glyma.09G074400	70	0.0039896
Glyma.20G019800	70	0.0085172	PF00294	pfkB-like carbohydrate kinase family protein
Glyma.10G188600	70	0.0142664	PF00917	TRAF-like superfamily protein
Glyma.13G024700	69.9853	1.97e-05	PF00682	2-isopropylmalate synthase 1
Glyma.14G012400	69.8125	0.00292138	PF03169	oligopeptide transporter 1
Glyma.20G121300	69.5	0.000613903	PF01569	lipid phosphate phosphatase 2
Glyma.08G178700	69.5	0.00138263	PF00515,PF13414,PF01425	translocon at the outer membrane of chloroplasts 64-V
Glyma.06G181000	69.3333	0.000273689	PF13251	ARM repeat superfamily protein
Glyma.11G203400	69.2	0.000316977	PF03169	YELLOW STRIPE like 7
Glyma.12G042600	69	0.0031238	PF11861,PF01728,PF07780	FtsJ-like methyltransferase family protein
Glyma.01G238200	69	0.00488367	PF00628,PF16135	Acyl-CoA N-acyltransferase with RING/FYVE/PHD-type zinc finger protein
Glyma.11G175700	68.6667	0.00162199	PF13920	histone mono-ubiquitination 1
Glyma.20G114300	68.5	0.000842171	PF07714	Protein kinase superfamily protein
Glyma.17G024800	68.5	0.00124139	PF07496	CW-type Zinc Finger
Glyma.02G163200	67.75	0.00090488	PF01061,PF00005	P-loop containing nucleoside triphosphate hydrolases superfamily protein
Glyma.09G198200	67.4	0.00368959		Transducin/WD40 repeat-like superfamily protein
Glyma.15G219200	67	0.00949704	PF13871,PF13872	RING/FYVE/PHD zinc finger superfamily protein
Glyma.01G073000	67	0.0243444		FAD-linked oxidases family protein
Glyma.01G061500	66.3333	0.000553054	PF00069	Protein kinase superfamily protein
Glyma.08G305100	66	0.000212488	PF03798	TRAM, LAG1 and CLN8 (TLC) lipid-sensing domain containing protein
Glyma.06G239100	66	0.0314426		Nuclear pore complex protein
Glyma.15G048400	65.2	0.000257396	PF03470,PF03468	XS domain-containing protein / XS zinc finger domain-containing protein-related
Glyma.13G027100	65	0.00159025
Glyma.06G288900	65	0.0188546	PF15612,PF15613,PF15614,PF00046,PF05066,PF02791	Homeodomain-like transcriptional regulator
Glyma.08G186200	64.3333	0.00183248	PF15346
Glyma.13G311000	64	0.00264408	PF02469	FASCICLIN-like arabinogalactan protein 17 precursor
Glyma.13G037400	64	0.00286928	PF05631	Major facilitator superfamily protein
Glyma.07G062500	64	0.00328813		GRIP-related ARF-binding domain-containing protein 1
Glyma.11G011700	64	0.00912184	PF03810,PF08389,PF08767	exportin 1A
Glyma.15G166700	64	0.013433	PF00533,PF04679,PF04675,PF01068	DNA ligase IV
Glyma.16G006500	63.5	0.00140295	PF00249	TRF-like 6
Glyma.05G220300	63	0.00238808	PF14604	SH3 domain-containing protein
Glyma.06G217700	63	0.0062119		nucleoporin-related
Glyma.12G120600	63	0.00825608	PF08477	RAC-like 3
Glyma.07G252100	63	0.00973769	PF04851,PF00271,PF14619	P-loop containing nucleoside triphosphate hydrolases superfamily protein
Glyma.08G152600	63	0.0136818	PF01585,PF01805	SWAP (Suppressor-of-White-APricot)/surp domain-containing protein / D111/G-patch domain-containing protein
Glyma.17G107500	62.8571	0.00146211	PF12796,PF01529	Ankyrin repeat family protein with DHHC zinc finger domain
Glyma.12G050100	62.6667	0.000828467	PF00564,PF02042	Plant regulator RWP-RK family protein
Glyma.08G220400	62	0.000199746
Glyma.20G004000	62	0.00115217	PF00076	nucleolin like 2
Glyma.06G089000	62	0.00739452
Glyma.11G191100	62	0.00739452	PF10474,PF10475
Glyma.08G349600	61	0.00462969	PF05529	B-cell receptor-associated protein 31-like
Glyma.18G028700	61	0.0221374
Glyma.07G091200	60.6667	0.00170919	PF03372	DNAse I-like superfamily protein
Glyma.20G119100	60.6667	0.00488972	PF00481	Protein phosphatase 2C family protein
Glyma.03G149900	60.4167	0.00103888		oxidoreductase, 2OG-Fe(II) oxygenase family protein
Glyma.18G021100	60.1667	0.0032132	PF01019	gamma-glutamyl transpeptidase 1
Glyma.07G070700	60	0.000251504	PF09497	RNA polymerase II transcription mediators
Glyma.09G203800	60	0.0297792	PF03137	Major facilitator superfamily protein
Glyma.20G072600	59.5	0.0036443		exocyst subunit exo70 family protein A1
Glyma.07G147700	59	0.001062	PF00646,PF01167	tubby like protein 1
Glyma.16G035100	59	0.00419505	PF04851,PF08880,PF00271	transcription regulatory protein SNF2, putative
Glyma.02G149200	59	0.00711902	PF04818,PF00855	Tudor/PWWP/MBT domain-containing protein
Glyma.13G325100	59	0.00711902	PF00320	GATA transcription factor 11
Glyma.20G183400	58.5	0.0016064	PF12348	ARM repeat superfamily protein
Glyma.20G070500	58.3333	0.00342063	PF08282,PF08472	Sucrose-6F-phosphate phosphohydrolase family protein
Glyma.02G136800	58	0.00299556	PF00787,PF08628,PF02194	Phox-associated domain;Phox-like;Sorting nexin, C-terminal
Glyma.13G229600	58	0.00299556	PF13837	sequence-specific DNA binding transcription factors
Glyma.15G154300	58	0.00393078	PF00571,PF16561	homolog of yeast sucrose nonfermenting 4
Glyma.02G073100	58	0.00393078	PF01585,PF12457,PF07842	GC-rich sequence DNA-binding factor-like protein with Tuftelin interacting domain
Glyma.08G155000	58	0.00393078
Glyma.10G190500	58	0.00489452	PF01657	plasmodesmata-located protein 2
Glyma.17G012600	58	0.00875838	PF00800	arogenate dehydratase 1
Glyma.13G156500	58	0.0276585	PF14709,PF04851,PF02170,PF00271,PF03368,PF00636	dicer-like 4
Glyma.09G273000	57.75	0.000251501		Mitochondrial ATP synthase D chain-related protein
Glyma.04G173000	57.25	0.000242715	PF00005,PF12698	ATP-binding cassette A2
Glyma.14G126500	57.2308	5.68e-06	PF07885,PF00027,PF11834,PF12796	K+ transporter 1
Glyma.03G102500	57	0.0077724	PF08737
Glyma.07G208600	56.5	0.00267619	PF00787,PF08628,PF02194	Phox-associated domain;Phox-like;Sorting nexin, C-terminal
Glyma.18G223300	56.4286	0.000785847	PF00400,PF14844,PF15787,PF02138	WD-40 repeat family protein / beige-related
Glyma.09G046800	56	0.00299877	PF00571,PF16561	homolog of yeast sucrose nonfermenting 4
Glyma.05G096000	56	0.00407643
Glyma.05G156000	56	0.0127945	PF07983,PF00332	O-Glycosyl hydrolases family 17 protein
Glyma.14G053300	55.5	0.00201068	PF00218	Aldolase-type TIM barrel family protein
Glyma.04G236600	55.5	0.0436121	PF00069,PF04755	OBP3-responsive gene 1
Glyma.13G340300	55.4286	0.00323098	PF00111,PF01799,PF03450,PF01315,PF00941,PF02738	xanthine dehydrogenase 1
Glyma.13G325000	55.2222	0.00072164	PF00169,PF01852,PF07059	Pleckstrin homology (PH) and lipid-binding START domains-containing protein
Glyma.05G213300	55	0.000877128
Glyma.01G010800	55	0.00481152		protein dimerizations
Glyma.16G098100	55	0.00851401	PF02789,PF00883	Cytosol aminopeptidase family protein
Glyma.18G149700	55	0.011654	PF00201,PF03033	UDP-Glycosyltransferase superfamily protein
Glyma.18G217100	54.5	0.0055373	PF02535	ZIP metal ion transporter family
Glyma.19G019200	54.5	0.00861112	PF00690,PF00702,PF00122	H(+)-ATPase 11
Glyma.04G116700	54.5	0.0149382	PF07719,PF13414,PF00515	peroxin 5
Glyma.07G035600	54.2	0.000135512	PF07728	ATPases;nucleotide binding;ATP binding;nucleoside-triphosphatases;transcription factor binding
Glyma.18G196200	54	0.00381548	PF00782,PF03919,PF01331	mRNA capping enzyme family protein
Glyma.01G168600	54	0.0044891	PF03676
Glyma.20G132900	54	0.0044891	PF13812,PF13041,PF14432	Tetratricopeptide repeat (TPR)-like superfamily protein
Glyma.05G209500	54	0.00767545	PF01388	ARID/BRIGHT DNA-binding domain;ELM2 domain protein
Glyma.04G192600	54	0.0275059	PF13422,PF13418,PF13415	Galactose oxidase/kelch repeat superfamily protein
Glyma.18G036300	53.75	0.000276318	PF02769,PF13507	purine biosynthesis 4
Glyma.05G209700	53.75	0.00291137	PF00271,PF04851,PF13625	homolog of xeroderma pigmentosum complementation group B 1
Glyma.01G175100	53.5	0.00234504	PF00076,PF12220	U1 small nuclear ribonucleoprotein-70K
Glyma.10G030000	53.1379	3.95e-05	PF13385,PF00400,PF14844,PF02138	Beige/BEACH domain ;WD domain, G-beta repeat protein
Glyma.20G238000	53.0833	0.00340317	PF00169,PF13091,PF00614	phospholipase D P1
Glyma.16G044400	53	0.00347945	PF08389	ARM repeat superfamily protein
Glyma.07G043700	53	0.00689363	PF03914	CCAAT-binding factor
Glyma.17G005500	53	0.0212101		binding
Glyma.20G150500	53	0.0316568	PF09742
Glyma.05G077300	53	0.0316568
Glyma.14G183000	52.6667	0.00135008	PF00627,PF14377,PF06012,PF06025,PF00632	ubiquitin-protein ligase 2
Glyma.14G136600	52.5	0.010687	PF01975	Survival protein SurE-like phosphatase/nucleotidase
Glyma.20G185600	52.5	0.0124715	PF13920,PF10269	Transmembrane Fragile-X-F-associated protein
Glyma.09G277700	52.5	0.0310635
SSU-rRNA-eukarya.103	52	0.00355647		rRNA processing protein-related
Glyma.13G007400	52	0.00482082	PF16719
Glyma.17G175900	52	0.00482082	PF10607
Glyma.02G101200	52	0.00608962
Glyma.08G356300	52	0.0154543	PF07800	Protein of unknown function (DUF1644)
Glyma.13G339800	52	0.0154543	PF01554	MATE efflux family protein
Glyma.03G047000	51.5	0.0488347	PF13191	LRR and NB-ARC domains-containing disease resistance protein
Glyma.02G204300	51.3333	0.0330947	PF00027,PF00520	cyclic nucleotide gated channel 5
Glyma.18G010200	51.2	0.00139596	PF01432	Zincin-like metalloproteases family protein
Glyma.02G168900	51	0.00121662	PF05843,PF00575	RNA binding;RNA binding
Glyma.05G137100	51	0.00559629	PF06217	basic pentacysteine1
Glyma.04G096600	50.6667	0.00144831	PF10347,PF10351	Golgi-body localisation protein domain ;RNA pol II promoter Fmp27 protein domain
Glyma.18G190400	50.5	0.00234907	PF00069	cyclin-dependent kinase B2;2
Glyma.09G274600	50	0.00437831	PF08263,PF00560,PF13855,PF00069	Leucine-rich receptor-like protein kinase family protein
Glyma.04G050000	50	0.00666974	PF07797	Protein of unknown function (DUF1639)
Glyma.09G144200	50	0.0151656	PF03141	S-adenosyl-L-methionine-dependent methyltransferases superfamily protein
Glyma.15G236500	50	0.0170843	PF00400	Transducin/WD40 repeat-like superfamily protein
Glyma.11G039900	49.6667	0.00370377	PF00169,PF06650,PF12624,PF06101,PF16910,PF16908	pleckstrin homology (PH) domain-containing protein
Glyma.04G109500	49.6667	0.027473	PF00931	transmembrane receptors;ATP binding
Glyma.09G267100	49.25	0.00874935	PF00400,PF14844,PF15787,PF02138	WD-40 repeat family protein / beige-related
Glyma.17G092200	49	0.0042389	PF08711	BAH domain ;TFIIS helical bundle-like domain
Glyma.19G153900	49	0.00489395	PF04818,PF00855	Tudor/PWWP/MBT domain-containing protein
Glyma.11G223000	49	0.00808651	PF13540,PF00415	Regulator of chromosome condensation (RCC1) family protein
Glyma.13G346300	49	0.0259206	PF00564,PF02042	Plant regulator RWP-RK family protein
Glyma.13G123700	49	0.0261332	PF13476,PF06470	Structural maintenance of chromosomes (SMC) family protein
Glyma.02G109900	48.75	0.000494402	PF14443	ATP/GTP-binding protein family
Glyma.16G074700	48.6667	0.000762864	PF03141	S-adenosyl-L-methionine-dependent methyltransferases superfamily protein
Glyma.17G188300	48.6	0.000124235	PF06176,PF03109,PF00144	ABC1 family protein
Glyma.10G275400	48.5714	0.00960819	PF07714	Protein kinase superfamily protein
Glyma.02G115200	48.5556	0.00340952	PF03106	WRKY DNA-binding protein 57
Glyma.20G112800	48.3333	0.000214681	PF03439	kow domain-containing transcription factor 1
Glyma.08G267900	48.3333	0.00133034	PF00789,PF14555,PF13899	UBX domain-containing protein
Glyma.20G221300	48.1667	0.000496064	PF14365,PF03080	Protein of Unknown Function (DUF239)
Glyma.07G224600	48	0.00245891	PF13015,PF12999	calmodulin-binding protein
Glyma.09G244700	48	0.00404165	PF01713,PF08590	smr (Small MutS Related) domain-containing protein
Glyma.08G287600	48	0.014209	PF13394,PF04055	Radical SAM superfamily protein
Glyma.04G230800	48	0.0189681
Glyma.14G131900	48	0.0243759	PF08312
Glyma.08G055400	47.6	0.0016226		Outer arm dynein light chain 1 protein
Glyma.19G105500	47.4	0.00106252	PF06839	GRF zinc finger / Zinc knuckle protein
Glyma.16G209600	47.25	0.0173633		Putative integral membrane protein conserved region (DUF2404)
Glyma.20G022400	47.2308	0.000271106	PF13920	SBP (S-ribonuclease binding protein) family protein
Glyma.09G160200	47.2222	0.0056844		Putative integral membrane protein conserved region (DUF2404)
Glyma.13G259200	47	0.00528471		interactor of constitutive active rops 1
Glyma.19G095700	47	0.00654267	PF02213	GYF domain-containing protein
Glyma.16G208800	46	0.00504587	PF02213,PF02201,PF03126	SWIB/MDM2 domain;Plus-3;GYF
Glyma.11G077200	46	0.00504587		Chalcone-flavanone isomerase family protein
Glyma.12G070100	46	0.00950175	PF03914,PF07540	binding
Glyma.07G103600	46	0.0158537	PF00684,PF01556,PF00226	Molecular chaperone Hsp40/DnaJ family protein
Glyma.16G219100	45.2222	0.000700899	PF07714	Protein kinase superfamily protein
Glyma.19G003100	45	0.00273686	PF04724	beta-1,4-N-acetylglucosaminyltransferase family protein
Glyma.16G017400	45	0.00562022	PF00249	Homeodomain-like superfamily protein
Glyma.14G000300	45	0.00573123	PF16206,PF16213,PF09324,PF12783,PF01369	SEC7-like guanine nucleotide exchange family protein
Glyma.02G086200	45	0.00573123	PF02358,PF00982	UDP-Glycosyltransferase / trehalose-phosphatase family protein
Glyma.02G161900	45	0.00994232		hydroxyproline-rich glycoprotein family protein
Glyma.02G200000	45	0.0194885	PF00098,PF00076	arginine/serine-rich zinc knuckle-containing protein 33
Glyma.20G065900	45	0.0226679	PF00012	heat shock protein 70 (Hsp 70) family protein
Glyma.12G226900	44.6667	0.00370746
Glyma.05G199200	44.6667	0.00418769	PF00262	calnexin 1
Glyma.14G218000	44.5	0.00930692	PF00098,PF03159	5'-3' exoribonuclease 3
Glyma.13G305000	44.5	0.00930692	PF00856	SET domain protein 2
Glyma.13G027300	44.375	8.91e-05	PF14647,PF14648
Glyma.14G044500	44.2	0.0015597	PF00917,PF13423,PF14533,PF12436	ubiquitin-specific protease 12
Glyma.20G058000	44	0.00203679	PF00368	hydroxy methylglutaryl CoA reductase 1
Glyma.18G280500	44	0.00312859		little nuclei1
Glyma.18G181200	44	0.00531854	PF02207	proteolysis 6
Glyma.16G034400	44	0.00902301		Transducin/WD40 repeat-like superfamily protein
Glyma.08G021400	44	0.0121654	PF07765	COP1-interactive protein 1
Glyma.10G172500	44	0.0237238		RING/FYVE/PHD zinc finger superfamily protein
Glyma.16G130000	43.8571	0.000453328	PF00076	RNA-binding (RRM/RBD/RNP motifs) family protein
Glyma.09G228100	43.8182	5.6e-05	PF07227,PF16312	Protein of unknown function (DUF1423)
Glyma.15G237300	43.6667	0.0016656	PF03145	Protein with RING/U-box and TRAF-like domains
SSU-rRNA-eukarya.134	43.5	0.00269331		rRNA processing protein-related
Glyma.06G143500	43.5	0.00302677	PF13638,PF00773	ribonuclease II family protein
Glyma.19G176300	43.5	0.0145744
Glyma.07G223100	43.375	0.00211424	PF13920	SBP (S-ribonuclease binding protein) family protein
Glyma.05G131500	43.2222	0.00166681	PF06465,PF00628,PF04851,PF00385,PF00271	chromatin remodeling 4
Glyma.09G085300	43	0.0111332	PF01235,PF03522	cation-chloride co-transporter 1
Glyma.16G213400	43	0.0286501		Peptidoglycan-binding LysM domain-containing protein
Glyma.15G166200	42.75	0.000265866	PF00046,PF00628	pathogenesis related homeodomain protein A
Glyma.08G279800	42.5161	0.00219965	PF00225	kinesin like protein for actin based chloroplast movement 1
Glyma.08G356500	42.3333	0.00166714	PF00564,PF07714	Protein kinase superfamily protein with octicosapeptide/Phox/Bem1p domain
Glyma.01G131400	42.2	0.00288767	PF05184,PF03489	saposin B domain-containing protein
Glyma.10G037300	42	0.000818851	PF02463,PF06470	Structural maintenance of chromosomes (SMC) family protein
Glyma.10G211600	42	0.0030745	PF04715,PF00117,PF00425	para-aminobenzoate (PABA) synthase family protein
Glyma.09G235900	42	0.0343761	PF00013	RNA-binding KH domain-containing protein
Glyma.06G173600	41.6667	0.0109183
Glyma.13G003700	41.5	0.00328546	PF00012	heat shock protein 70 (Hsp 70) family protein
Glyma.11G100400	41.5	0.00371377	PF04818,PF00855	Tudor/PWWP/MBT domain-containing protein
Glyma.18G297900	41.5	0.00677532		HEAT repeat-containing protein
Glyma.06G068000	41.1429	0.00467152
Glyma.07G144700	41	0.0010636	PF00083	phosphate transporter 4;2
Glyma.10G270000	41	0.00249448	PF01569	lipid phosphate phosphatase 2
Glyma.18G053700	41	0.00355259	PF05193,PF00675,PF16187	Insulinase (Peptidase family M16) family protein
Glyma.08G148500	41	0.00410582	PF00010	basic helix-loop-helix (bHLH) DNA-binding superfamily protein
Glyma.19G102500	41	0.00528411	PF00777	MALE GAMETOPHYTE DEFECTIVE 2
Glyma.02G027400	41	0.00885233	PF00072	response regulator 3
Glyma.09G192000	41	0.0127749	PF14309
Glyma.05G112600	41	0.018145	PF13920	RING/U-box superfamily protein
Glyma.11G035300	41	0.018145	PF03171,PF14226	2-oxoglutarate (2OG) and Fe(II)-dependent oxygenase superfamily protein
Glyma.13G143600	41	0.0392606	PF07724,PF02933,PF05496,PF02359	ATPase, AAA-type, CDC48 protein
Glyma.09G211000	40.5	0.00722075	PF14703,PF13967,PF02714	early-responsive to dehydration stress protein (ERD4)
Glyma.02G275900	40.5	0.020664	PF14531,PF03822	CBL-interacting protein kinase 3
Glyma.18G248200	40.5	0.03982	PF00076	RNA-binding (RRM/RBD/RNP motifs) family protein
Glyma.13G024500	40.3699	0.000117193
Glyma.09G157300	40.25	0.00252487	PF08642
Glyma.16G032700	40.1429	0.000548728	PF00069	Protein kinase superfamily protein
Glyma.09G136900	40	0.00431123	PF00753,PF07521,PF10996,PF13299	cleavage and polyadenylation specificity factor 100
Glyma.01G068000	40	0.00544641	PF02518,PF00183	Chaperone protein htpG family protein
Glyma.09G063100	40	0.00544641	PF00400,PF12265	Transducin family protein / WD-40 repeat family protein
Glyma.17G193800	40	0.00649702	PF07575
Glyma.08G229400	40	0.00810331	PF00035,PF00271,PF07717,PF04408	DEA(D/H)-box RNA helicase family protein
Glyma.13G360400	40	0.0109589	PF09405	CASC3/Barentsz eIF4AIII binding
Glyma.04G232700	40	0.0110597	PF08314
Glyma.05G244800	40	0.016196		golgin candidate 2
Glyma.06G208900	40	0.0304996	PF00122,PF12710,PF16209,PF16212	ATPase E1-E2 type family protein / haloacid dehalogenase-like hydrolase family protein
Glyma.18G126500	40	0.0390018	PF00854	nitrate transporter 1:2
Glyma.16G194400	40	0.0390018	PF01429	methyl-CPG-binding domain protein 13
Glyma.10G168300	39.6	0.000365862	PF14365,PF03080	Protein of Unknown Function (DUF239)
Glyma.16G137300	39.5	0.000246682	PF05729,PF13676	disease resistance protein (TIR-NBS-LRR class), putative
Glyma.01G147800	39.5	0.00133618	PF01852,PF07059	ENHANCED DISEASE RESISTANCE 2
Glyma.06G260700	39	0.00327047	PF00400	Transducin/WD40 repeat-like superfamily protein
Glyma.19G222700	39	0.00349144	PF00481	Protein phosphatase 2C family protein
Glyma.14G140800	39	0.00628968	PF00271,PF00270,PF00476	helicases;ATP-dependent helicases;nucleic acid binding;ATP binding;DNA-directed DNA polymerases;DNA binding
Glyma.12G053300	38.8333	0.00385329
Glyma.02G224600	38.7	0.00301833	PF00854	peptide transporter 1
Glyma.08G166300	38.6667	0.00349442
Glyma.18G002400	38.6667	0.00908888	PF04423,PF13175	DNA repair-recombination protein (RAD50)
Glyma.12G054000	38.6	0.00105833	PF00232	beta glucosidase 17
Glyma.11G008600	38.5	0.00497974		RING/FYVE/PHD zinc finger superfamily protein
Glyma.10G292100	38.5	0.00645708
Glyma.01G079300	38.5	0.00824387	PF09749
Glyma.18G075000	38.5	0.0165928	PF17125,PF01189	S-adenosyl-L-methionine-dependent methyltransferases superfamily protein
Glyma.08G256300	38	0.00333977		little nuclei1
Glyma.16G131900	38	0.00408517	PF13589	compromised recognition of TCV 1
Glyma.09G059900	38	0.00621597	PF00013	RNA-binding KH domain-containing protein
Glyma.05G205100	38	0.00621597	PF01429	methyl-CPG-binding domain protein 13
Glyma.13G072400	38	0.00714492
Glyma.16G010400	38	0.00714492	PF12090
Glyma.10G199900	38	0.00901625		DNA binding
Glyma.07G218700	38	0.00901625		Transducin/WD40 repeat-like superfamily protein
Glyma.18G067600	38	0.0441521	PF04859	Plant protein of unknown function (DUF641)
Glyma.17G175000	37.8571	0.000593062
Glyma.10G159700	37.8333	0.00617533	PF00291	cysteine synthase D1
Glyma.06G227500	37.75	0.00345263	PF04859	Plant protein of unknown function (DUF641)
Glyma.12G236900	37.5	0.00393392	PF09725
Glyma.20G154200	37.5	0.00688941	PF01486,PF00319	AGAMOUS-like 42
Glyma.06G037600	37.3333	0.0349761	PF00076	RNA-binding protein 47C
Glyma.10G148600	37	0.00382706	PF01612	Polynucleotidyl transferase, ribonuclease H-like superfamily protein
Glyma.06G093500	37	0.00628141	PF01753,PF13423	ubiquitin-specific protease 16
Glyma.18G233700	37	0.00836258	PF03931,PF01466	SKP1-like 21
Glyma.08G175500	37	0.0237032	PF13423	ubiquitin-specific protease 25
Glyma.11G118900	37	0.0237032	PF00569,PF00249,PF04433,PF16495	DNA-binding family protein
Glyma.06G063400	36.5	0.00948291	PF00628,PF08074,PF04851,PF00271,PF06465,PF00385,PF06461	chromatin remodeling factor CHD3 (PICKLE)
Glyma.05G176400	36.5	0.012349	PF00076	RNA-binding (RRM/RBD/RNP motifs) family protein
Glyma.19G193700	36.4583	0.00168851	PF01156	uridine-ribohydrolase 1
Glyma.08G360000	36.3333	0.00981748
Glyma.07G113200	36.0326	0.00856198	PF03547	Auxin efflux carrier family protein
Glyma.14G137100	36	0.000615583	PF01396,PF13368,PF01751,PF01131	DNA topoisomerase, type IA, core
Glyma.13G208800	36	0.00661566	PF09335	SNARE associated Golgi protein family
Glyma.06G108500	36	0.00682806	PF13831,PF13832	PHD finger family protein
Glyma.05G102400	36	0.0347974	PF13371,PF00515,PF13414	Tetratricopeptide repeat (TPR)-like superfamily protein
Glyma.07G270200	35.8824	0.0128377	PF12695	alpha/beta-Hydrolases superfamily protein
Glyma.15G176200	35.875	0.000294485
Glyma.03G130000	35.8571	0.000267232	PF00072	response regulator 9
Glyma.12G242300	35.75	0.000666846	PF01926,PF02212,PF00169,PF01031	dynamin-like 3
Glyma.03G139300	35.617	0.00123574	PF07974,PF03016	exostosin family protein
Glyma.19G102000	35.5	0.0039476	PF00010	basic helix-loop-helix (bHLH) DNA-binding superfamily protein
Glyma.09G087900	35.3333	0.00639377	PF04050,PF02854	binding;RNA binding
Glyma.01G194700	35.0185	6.38e-05	PF13508,PF00696	N-acetyl-l-glutamate synthase 1
Glyma.11G095300	35	0.0042221	PF00226,PF13414	Heat shock protein DnaJ with tetratricopeptide repeat
Glyma.06G065700	35	0.0056551
Glyma.01G217100	35	0.00690809	PF13426,PF07714	PAS domain-containing protein tyrosine kinase family protein
Glyma.15G070100	35	0.00763953	PF13923,PF00271,PF00176	SNF2 domain-containing protein / helicase domain-containing protein / zinc finger protein-related
Glyma.17G075600	35	0.00763953
Glyma.09G046500	35	0.00934699	PF10557,PF00888	cullin 1
Glyma.07G012400	35	0.018882	PF07303	dentin sialophosphoprotein-related
Glyma.08G135900	35	0.0301933	PF07534	TLD-domain containing nucleolar protein
Glyma.15G061500	35	0.0488704
Glyma.02G251900	34.7632	0.00289389	PF00153	Mitochondrial substrate carrier family protein
Glyma.04G071300	34.6667	0.00262132
Glyma.11G248500	34.6667	0.0163994	PF00069	Protein kinase superfamily protein
Glyma.16G118800	34.6522	0.0014654	PF00132,PF06426	serine acetyltransferase 3;2
Glyma.04G087300	34.5	0.0263924
Glyma.10G187400	34.3333	0.00122542	PF00892	nodulin MtN21 /EamA-like transporter family protein
Glyma.09G184700	34.2	0.0023906	PF03372	DNAse I-like superfamily protein
Glyma.19G132200	34	0.00881993	PF09713	Plant protein 1589 of unknown function
Glyma.14G145000	34	0.016546	PF01661	appr-1-p processing enzyme family protein
Glyma.04G191600	34	0.0247789	PF13181,PF13424,PF13414,PF00515	tetratricopeptide repeat (TPR)-containing protein
Glyma.06G115600	34	0.0247789	PF00249,PF04433,PF16495	SWITCH/sucrose nonfermenting 3C
Glyma.07G249600	34	0.0463141	PF07496	CW-type Zinc Finger
Glyma.12G190800	33.75	0.0014429	PF13639	RING-H2 group F2A
Glyma.03G252300	33.6667	0.0049577	PF12074,PF13646	ILITYHIA
Glyma.01G159900	33.6667	0.00523471	PF01465	Golgi-localized GRIP domain-containing protein
Glyma.02G192600	33.3846	0.00444232	PF06886	TPX2 (targeting protein for Xklp2) protein family
Glyma.16G062000	33.3333	0.00552468	PF13964,PF13418	Galactose oxidase/kelch repeat superfamily protein
Glyma.04G184600	33	0.00277388	PF00787,PF13901	Phox (PX) domain-containing protein
Glyma.01G164600	33	0.00434192	PF00141	ascorbate peroxidase 3
Glyma.02G046900	33	0.00764921	PF02809,PF13519	regulatory particle non-ATPase 10
Glyma.03G080200	33	0.00764921
Glyma.01G202300	33	0.0146122	PF01926,PF01018	GTP-binding protein Obg/CgtA
Glyma.17G139200	33	0.0180868	PF15413,PF01237	OSBP(oxysterol binding protein)-related protein 2A
Glyma.07G021400	32.8	0.0134467
Glyma.13G006200	32.6667	0.00276352	PF00569,PF00249	homolog of yeast ADA2 2A
Glyma.15G067900	32.6667	0.00290848	PF07496,PF02362	HSI2-like 1
Glyma.07G248000	32.625	0.0024506	PF00481	Protein phosphatase 2C family protein
Glyma.08G229600	32.5556	0.00109512	PF03343	SART-1 family
Glyma.11G005300	32.5	0.00599115	PF00628,PF16135	Acyl-CoA N-acyltransferase with RING/FYVE/PHD-type zinc finger protein
Glyma.06G145900	32.3333	0.000304961	PF10408,PF00622	related to KPC1
Glyma.09G259400	32.3333	0.00468695	PF09497	RNA polymerase II transcription mediators
Glyma.12G027100	32.1905	0.00177373	PF13676,PF00931	disease resistance protein (TIR-NBS-LRR class), putative
Glyma.11G117900	32	0.00181416
Glyma.10G175300	32	0.00445957
Glyma.17G213500	32	0.00445957	PF00564,PF13414	Octicosapeptide/Phox/Bem1p (PB1) domain-containing protein / tetratricopeptide repeat (TPR)-containing protein
Glyma.07G118800	32	0.00796216	PF00022	actin-related protein 4
Glyma.18G109800	32	0.00841126	PF04840,PF04841	vacuoleless1 (VCL1)
Glyma.11G102600	32	0.00841126	PF00397,PF01846	pre-mRNA-processing protein 40C
Glyma.10G101500	32	0.0115829
Glyma.14G094400	32	0.0130165	PF07714,PF14381	Protein kinase superfamily protein
Glyma.12G166500	32	0.0130165	PF01823	MAC/Perforin domain-containing protein
Glyma.07G216600	32	0.017302	PF00118,PF01504	FORMS APLOID AND BINUCLEATE CELLS 1C
Glyma.04G048300	32	0.0193372	PF08491	FAD/NAD(P)-binding oxidoreductase family protein
Glyma.08G114900	32	0.0290602	PF02985,PF13646	ARM repeat superfamily protein
Glyma.05G155100	32	0.0290602	PF00271,PF00270	P-loop containing nucleoside triphosphate hydrolases superfamily protein
Glyma.12G155400	32	0.0407179	PF00069	Protein kinase superfamily protein
Glyma.09G213700	31.9655	0.000139228
Glyma.05G200800	31.875	0.00045709	PF02309,PF02362,PF06507	auxin response factor 2
Glyma.16G207900	31.8571	0.00100133	PF08642
Glyma.14G150900	31.6154	0.00865263	PF05911	Plant protein of unknown function (DUF869)
Glyma.13G182800	31.5643	5.33e-05	PF06749	Protein of unknown function (DUF1218)
Glyma.06G324500	31.5	0.00487008	PF03467	Smg-4/UPF3 family protein
Glyma.17G143500	31.5	0.00638684	PF03016	Exostosin family protein
Glyma.01G137300	31.5	0.0103805	PF12352	golgi snare 12
Glyma.06G112300	31.5	0.0227941	PF09649
Glyma.18G284500	31.4286	0.0176375
Glyma.16G046600	31.4286	0.0262713	PF13202,PF13499,PF00153	Mitochondrial substrate carrier family protein
Glyma.13G147300	31.1429	0.000862863	PF10358
Glyma.04G018100	31	0.000694029	PF08142,PF04950
Glyma.06G097800	31	0.00528408	PF16057,PF13385,PF00400,PF14844,PF15787,PF02138	binding
Glyma.20G166300	31	0.00713306	PF13898	ubiquitin interaction motif-containing protein
Glyma.16G012100	31	0.00713306	PF03914	CCAAT-binding factor
Glyma.07G268200	31	0.00933656		binding
Glyma.11G136700	31	0.0095596	PF00806,PF07990	pumilio 2
Glyma.09G120200	31	0.0119979	PF03989,PF00521	DNA GYRASE A
Glyma.17G102800	31	0.0126038	PF10409,PF02181	actin binding
Glyma.16G116400	31	0.0260109	PF08147	hydrolases, acting on acid anhydrides, in phosphorus-containing anhydrides;ATP-dependent helicases;nucleic acid binding;ATP binding;RNA binding;helicases
Glyma.18G232900	31	0.0376708	PF09497	RNA polymerase II transcription mediators
Glyma.06G175900	31	0.0376708	PF07714	FUS3-complementing gene 2
Glyma.01G000200	30.6667	0.0326166
Glyma.18G256400	30.6058	0.00110207	PF07847	Protein of unknown function (DUF1637)
Glyma.11G012200	30.5	0.00856034	PF00271,PF00270	P-loop containing nucleoside triphosphate hydrolases superfamily protein
Glyma.11G023700	30.5	0.00856034	PF01388,PF02928,PF02375,PF00628,PF08429,PF02373	transcription factor jumonji (jmjC) domain-containing protein
Glyma.03G202700	30.5	0.0247915	PF08626,PF12739	Tetratricopeptide repeat (TPR)-like superfamily protein
Glyma.08G148900	30.5	0.0302679	PF15306	proline-rich family protein
Glyma.10G136700	30.0625	1.12e-05	PF00646	F-box/RNI-like/FBD-like domains-containing protein
Glyma.09G169500	30	0.00512975	PF07714	Protein kinase superfamily protein
Glyma.01G245700	30	0.00558722	PF14308,PF00226	DNAJ heat shock N-terminal domain-containing protein
Glyma.02G055700	30	0.00744942
Glyma.08G162800	30	0.0101142	PF13893,PF00642	Zinc finger C-x8-C-x5-C-x3-H type family protein
Glyma.02G045400	30	0.0112657	PF05383	winged-helix DNA-binding transcription factor family protein
Glyma.20G202100	30	0.0148799	PF00917	TRAF-like superfamily protein
Glyma.14G119400	30	0.0151981	PF09377,PF01172	sequence-specific DNA binding transcription factors
Glyma.09G018700	30	0.0228264	PF00730
Glyma.05G145400	30	0.0228264
Glyma.05G061500	30	0.0238711	PF13696,PF08783	DWNN domain, a CCHC-type zinc finger
Glyma.02G146900	30	0.0482287		time for coffee
Glyma.12G143500	30	0.0482287
Glyma.04G122400	29.75	0.00873537	PF10539	DCD (Development and Cell Death) domain protein
Glyma.20G178500	29.6667	0.00195449	PF00249	Duplicated homeodomain-like superfamily protein
Glyma.03G184600	29.6667	0.00318599	PF13639	Transducin/WD40 repeat-like superfamily protein
Glyma.19G167900	29.6667	0.00321909	PF05033,PF00856,PF10440	SET-domain containing protein lysine methyltransferase family protein
Glyma.06G074700	29.5	0.00547975
Glyma.07G241500	29.5	0.0122635	PF04802	binding
Glyma.13G068200	29.5	0.0462612	PF07690	Major facilitator superfamily protein
Glyma.10G204900	29.4286	0.00040886	PF13920,PF10269	Transmembrane Fragile-X-F-associated protein
Glyma.20G191400	29.3846	0.00327911	PF13920	RING/U-box superfamily protein
Glyma.05G133100	29.3333	0.00119796	PF00627,PF14377,PF06012,PF00632,PF06025	ubiquitin-protein ligase 1
Glyma.U032300	29.3333	0.00726997	PF03081	exocyst subunit exo70 family protein A1
Glyma.13G075300	29	0.0052902	PF07744,PF00076	RNA recognition motif (RRM)-containing protein
Glyma.02G261800	29	0.00595171	PF00271,PF00176	chromatin remodeling 42
Glyma.20G127600	29	0.00689638		sodium:hydrogen antiporter 1
Glyma.05G189400	29	0.0108449	PF14938,PF13424	tetratricopeptide repeat (TPR)-containing protein
Glyma.17G062900	29	0.0138179	PF11559	Afadin/alpha-actinin-binding protein
Glyma.12G081900	29	0.0200001	PF01066	aminoalcoholphosphotransferase 1
Glyma.13G236800	28.9	4.38e-05	PF00642	Zinc finger C-x8-C-x5-C-x3-H type family protein
Glyma.12G159600	28.6667	0.00120099	PF14259,PF00076	RNA-binding (RRM/RBD/RNP motifs) family protein
Glyma.06G293200	28.5	0.00174351
Glyma.09G136800	28.5	0.00787483
Glyma.02G212700	28.5	0.0182474
Glyma.20G183000	28.5	0.029578	PF00849,PF01479	pseudouridine synthase family protein
Glyma.16G095200	28.5	0.029578	PF00170,PF07777,PF16596	basic region/leucine zipper transcription factor 16
Glyma.14G207200	28.5	0.0426943	PF00005,PF00664	ABC transporter of the mitochondrion 3
Glyma.09G002300	28.2083	0.00102006	PF03476,PF03473,PF00266	molybdenum cofactor sulfurase (LOS5) (ABA3)
Glyma.07G263300	28.1429	0.000395351	PF14703,PF13967,PF02714	ERD (early-responsive to dehydration stress) family protein
Glyma.06G133400	28	0.00487886	PF00566	Ypt/Rab-GAP domain of gyp1p superfamily protein
Glyma.06G056500	28	0.00580206	PF02736,PF00612,PF01843,PF00063	myosin, putative
Glyma.10G171500	28	0.00740595	PF14237,PF00076	RNA binding (RRM/RBD/RNP motifs) family protein
Glyma.06G018400	28	0.00740595	PF08142,PF04950
Glyma.14G081100	28	0.0107292	PF07819	alpha/beta-Hydrolases superfamily protein
Glyma.12G211000	28	0.0120435	PF14381,PF07714	Mitogen activated protein kinase kinase kinase-related
Glyma.04G245700	28	0.0129406	PF08729	wound-responsive family protein
Glyma.07G069800	28	0.0129406	PF03931,PF01466	SKP1-like 21
Glyma.18G034000	28	0.0274365	PF00854	Major facilitator superfamily protein
Glyma.17G052500	28	0.0274365	PF00481	homology to ABI2
Glyma.02G214700	28	0.0274365	PF00175,PF00258,PF00667	P450 reductase 1
Glyma.17G161800	28	0.0274365	PF07714	Protein kinase superfamily protein
Glyma.02G206000	27.875	0.000445863	PF04484	Family of unknown function (DUF566)
Glyma.01G218800	27.8	0.0131986	PF08263,PF07714	Leucine-rich repeat protein kinase family protein
Glyma.17G219600	27.6667	0.000751048	PF01713,PF08590	CTC-interacting domain 7
Glyma.01G164500	27.6667	0.00378823	PF04783,PF04782	Protein of unknown function (DUF630) ;Protein of unknown function (DUF632)
Glyma.07G006300	27.6667	0.0137458	PF00012	Heat shock protein 70 (Hsp 70) family protein
Glyma.10G210000	27.5278	0.000445934	PF17047,PF00168	Calcium-dependent lipid-binding (CaLB domain) family protein
Glyma.08G352600	27.5	0.00623103	PF13921,PF07529	Helicase/SANT-associated, DNA binding protein
Glyma.19G252600	27.5	0.00705524	PF00170,PF07777,PF16596	G-box binding factor 3
Glyma.10G136500	27.5	0.0200664
Glyma.15G047600	27.4	0.000448409
Glyma.01G094800	27.4	0.000462499	PF02493	Histone H3 K4-specific methyltransferase SET7/9 family protein
Glyma.12G135500	27.3636	0.00335844	PF13812,PF01535	Tetratricopeptide repeat (TPR)-like superfamily protein
Glyma.07G074800	27.3333	0.00128851	PF00271,PF00270	P-loop containing nucleoside triphosphate hydrolases superfamily protein
Glyma.19G125600	27.3333	0.00177218	PF14641,PF14632,PF14639,PF14635,PF14878,PF14633	global transcription factor group B1
Glyma.18G296700	27.3333	0.00764443
Glyma.15G171400	27.3333	0.00764443	PF11705
Glyma.08G031700	27.2857	0.000461778	PF00365	phosphofructokinase 3
Glyma.01G046500	27.2581	0.0219477	PF04116	sphingoid base hydroxylase 2
Glyma.17G213600	27	0.0053902	PF13833,PF00036	calcium-binding EF hand family protein
Glyma.14G222100	27	0.0057503	PF01466,PF03931	S phase kinase-associated protein 1
Glyma.06G218300	27	0.0109387	PF00459	myo-inositol monophosphatase like 1
Glyma.09G208500	27	0.0132322	PF00170,PF07777,PF16596	basic region/leucine zipper transcription factor 16
Glyma.13G027200	27	0.0161285
Glyma.18G245600	27	0.0239946	PF00013	RNA-binding KH domain-containing protein
Glyma.19G006000	27	0.0375146	PF00397,PF04851,PF00271	DEAD box RNA helicase family protein
Glyma.18G174200	26.8	0.00350121	PF00564,PF07714	Protein kinase superfamily protein with octicosapeptide/Phox/Bem1p domain
Glyma.16G116200	26.75	0.0111716		Transducin/WD40 repeat-like superfamily protein
Glyma.11G007100	26.6667	0.00394558	PF07714	Protein kinase superfamily protein
Glyma.16G048800	26.5	0.00107691	PF02140,PF01301	beta-galactosidase 7
Glyma.08G111400	26.5	0.00625826	PF13020	Histidine kinase-, DNA gyrase B-, and HSP90-like ATPase family protein
Glyma.17G000600	26.5	0.00625826	PF03372	Endonuclease/exonuclease/phosphatase family protein
Glyma.18G016000	26.5	0.00725668	PF07539	ARM repeat superfamily protein
Glyma.02G293100	26.5	0.0221462	PF04078	Cell differentiation, Rcd1-like protein
Glyma.09G199600	26.4286	0.00324222	PF00860	Xanthine/uracil permease family protein
Glyma.02G101800	26.3333	0.00584119		nuclear matrix constituent protein-related
Glyma.18G256000	26.0833	0.00166093	PF00847	Integrase-type DNA-binding superfamily protein
Glyma.01G149500	26	0.00082769
Glyma.05G244700	26	0.00577283	PF00025	RAB GTPase homolog A6A
Glyma.08G283100	26	0.00642449		anthranilate phosphoribosyltransferase, putative
Glyma.03G133700	26	0.00663873	PF04851,PF00271,PF13892	INO80 ortholog
Glyma.15G000200	26	0.0123233
Glyma.07G218100	26	0.0123233	PF01535,PF13041	Pentatricopeptide repeat (PPR) superfamily protein
Glyma.18G267200	26	0.0212664	PF07897,PF16135,PF16136	ABI five binding protein 3
Glyma.02G222900	26	0.0212664	PF06972	GBF-interacting protein 1
Glyma.11G079200	26	0.0212664	PF03635	VPS35 homolog A
Glyma.11G076100	26	0.0212664	PF05911	Plant protein of unknown function (DUF869)
Glyma.11G075100	26	0.0266073	PF11995,PF00225	ATP binding microtubule motor family protein
Glyma.04G022000	26	0.033444
Glyma.07G163100	26	0.033444
Glyma.10G062800	25.9167	0.000298834	PF10358
Glyma.06G160600	25.8333	0.00153662		Protein kinase superfamily protein
Glyma.04G066600	25.75	0.000609762
Glyma.08G014800	25.75	0.00348421	PF00307,PF00225	P-loop nucleoside triphosphate hydrolases superfamily protein with CH (Calponin Homology) domain
Glyma.09G262000	25.6667	0.00153304	PF02254,PF00999	K+ efflux antiporter 2
Glyma.01G074400	25.6667	0.00627156
Glyma.20G215200	25.6	0.00223283
Glyma.15G025800	25.5714	0.000134615	PF12710,PF16209,PF16212	ATPase E1-E2 type family protein / haloacid dehalogenase-like hydrolase family protein
Glyma.07G250700	25.5	0.0130886	PF13892,PF09110,PF04851,PF00271,PF09111	chromatin remodeling factor17
Glyma.07G249700	25.5	0.0181546	PF00571,PF16561	homolog of yeast sucrose nonfermenting 4
Glyma.05G094000	25.5	0.0211488	PF04095	nicotinate phosphoribosyltransferase 2
Glyma.10G294700	25.5	0.0245358	PF00566	Ypt/Rab-GAP domain of gyp1p superfamily protein
Glyma.06G045200	25.5	0.0245358	PF12174,PF05236	TBP-associated factor 4
Glyma.13G326200	25.5	0.0479417	PF13899,PF13848,PF00085	PDI-like 1-4
Glyma.05G115200	25.4	0.000749968	PF01535,PF13041	Pentatricopeptide repeat (PPR) superfamily protein
Glyma.10G036800	25.3846	0.000295066	PF07690	phosphate transporter 1;4
Glyma.19G170800	25.1429	0.0209981	PF13738	Flavin-binding monooxygenase family protein
Glyma.12G185500	25.125	0.000312984	PF00786,PF00620	Rho GTPase activating protein with PAK-box/P21-Rho-binding domain
Glyma.08G074400	25.125	0.00240255	PF00646,PF01344	Galactose oxidase/kelch repeat superfamily protein
Glyma.14G035100	25.1212	0.00435691
Glyma.12G167800	25	0.0010626	PF00400,PF08145	Transducin/WD40 repeat-like superfamily protein
Glyma.08G153900	25	0.00176534
Glyma.01G060700	25	0.00208075	PF00271,PF04408,PF07717	RNA helicase family protein
Glyma.10G265900	25	0.00689773	PF00085,PF04777	quiescin-sulfhydryl oxidase 1
Glyma.09G238100	25	0.00790541	PF01490	Transmembrane amino acid transporter family protein
Glyma.15G072000	25	0.00937565	PF03031,PF00035	C-terminal domain phosphatase-like 1
Glyma.12G143400	25	0.0119422		UDP-glucuronic acid decarboxylase 1
Glyma.07G122000	25	0.0144751	PF14572,PF13793	Phosphoribosyltransferase family protein
Glyma.03G166400	25	0.0224075	PF00249,PF14379	phosphate starvation response 1
Glyma.15G259800	25	0.0293102
Glyma.08G093800	25	0.0293102	PF13532	hydroxyproline-rich glycoprotein family protein
Glyma.09G114700	25	0.0295161	PF09763	exocyst complex component sec3A
Glyma.18G253900	25	0.0460228	PF08164,PF13339	rRNA processing protein-related
Glyma.02G051800	25	0.0460228	PF13589	compromised recognition of TCV 1
Glyma.11G038000	24.8	0.000557285	PF00856,PF05033,PF02182	SU(VAR)3-9 homolog 6
Glyma.02G055100	24.75	0.00308531		Chaperone DnaJ-domain superfamily protein
Glyma.02G075300	24.7143	0.00933793	PF01554	MATE efflux family protein
Glyma.14G223000	24.6667	0.00296583	PF07731,PF07732,PF00394	SKU5 similar 5
Glyma.12G144100	24.6667	0.00486815	PF00954,PF08276,PF01453,PF07714	S-locus lectin protein kinase family protein
Glyma.02G271500	24.5	0.00364434	PF00917,PF13423,PF14533,PF12436	ubiquitin-specific protease 12
Glyma.14G106500	24.4444	0.00247092	PF01713,PF08590	CTC-interacting domain 7
Glyma.05G209900	24.2941	2.9e-05	PF04749	PLAC8 family protein
Glyma.13G066200	24.2	0.00059759	PF00439	DNA-binding bromodomain-containing protein
Glyma.09G158300	24.125	0.00101455	PF02213,PF02201,PF03126	SWIB/MDM2 domain;Plus-3;GYF
Glyma.09G188700	24.0496	0.000932112	PF01740,PF00916	sulfate transporter 3;1
Glyma.11G181500	24	0.00205423	PF02338	OTU-like cysteine protease family protein
Glyma.06G166700	24	0.00576637	PF01529	DHHC-type zinc finger family protein
Glyma.01G031900	24	0.00665356	PF02358,PF00982	trehalose-phosphatase/synthase 9
Glyma.17G031500	24	0.00743303	PF14383,PF14309
Glyma.19G208700	24	0.0133624	PF00046	Homeodomain-like superfamily protein
Glyma.01G225700	24	0.0143546	PF02207	PHD finger protein-related
Glyma.09G099400	24	0.0143546	PF02892,PF05699,PF14372	BED zinc finger ;hAT family dimerisation domain
Glyma.12G236100	24	0.0143546	PF00271,PF00176	SNF2 domain-containing protein / helicase domain-containing protein
Glyma.12G020200	24	0.0143546	PF00622	TRAUCO
Glyma.06G189500	24	0.0178152	PF01535,PF13041	Pentatricopeptide repeat (PPR) superfamily protein
Glyma.12G004200	24	0.0178152	PF00406	P-loop containing nucleoside triphosphate hydrolases superfamily protein
Glyma.02G084700	24	0.0257527
Glyma.11G038500	24	0.0257527	PF02732	Restriction endonuclease, type II-like superfamily protein
Glyma.15G211400	24	0.0414286	PF00154	recA DNA recombination family protein
Glyma.20G217500	24	0.0414286	PF06552	Tetratricopeptide repeat (TPR)-like superfamily protein
Glyma.08G210000	24	0.0414286	PF04003
Glyma.13G080800	24	0.0414286
Glyma.14G159400	23.8333	0.00234716	PF10497,PF02373	Transcription factor jumonji (jmjC) domain-containing protein
Glyma.01G155300	23.8333	0.0415778	PF09379,PF00373,PF00784,PF00225	kinesin-like calmodulin-binding protein (ZWICHEL)
Glyma.16G112800	23.8	0.00613083	PF05327	RNA polymerase I specific transcription initiation factor RRN3 protein
Glyma.16G082400	23.6667	0.0017123	PF00626,PF04810,PF04815,PF08033,PF04811	Sec23/Sec24 protein transport family protein
Glyma.18G298500	23.6667	0.0158512	PF07786	Protein of unknown function (DUF1624)
Glyma.06G191400	23.5	0.00779775	PF12698,PF00005	ABC2 homolog 6
Glyma.07G080900	23.5	0.00838287	PF01486,PF00319	AGAMOUS-like 20
Glyma.08G196100	23.5	0.0119037	PF07303	dentin sialophosphoprotein-related
Glyma.10G108000	23.5	0.0304988	PF00069	Protein kinase superfamily protein
Glyma.20G055800	23.25	0.000939544	PF00254	FKBP-like peptidyl-prolyl cis-trans isomerase family protein
Glyma.17G203800	23.2	0.00364726	PF13639	RING/U-box superfamily protein
Glyma.03G088400	23.2	0.0173452	PF13414,PF04564	carboxyl terminus of HSC70-interacting protein
Glyma.10G218400	23	0.00137292	PF00118,PF01504	FORMS APLOID AND BINUCLEATE CELLS 1A
Glyma.10G211400	23	0.00381358	PF01264	chorismate synthase, putative / 5-enolpyruvylshikimate-3-phosphate phospholyase, putative
Glyma.20G025400	23	0.00681246	PF13537,PF00733	Asparagine synthase family protein
Glyma.18G241300	23	0.00834476	PF00642	zinc finger protein 1
Glyma.01G152400	23	0.00834476
Glyma.14G190000	23	0.00834476	PF00514	ARM repeat superfamily protein
Glyma.03G146200	23	0.00834476	PF04130	spindle pole body component 98
Glyma.08G361500	23	0.0107949	PF04652,PF14288,PF02364	glucan synthase-like 12
Glyma.04G131700	23	0.0147426	PF01926,PF02212,PF01031	dynamin-related protein 3A
Glyma.15G269200	23	0.0147426	PF15306	proline-rich family protein
Glyma.08G276900	23	0.0147426	PF00588	tRNA/rRNA methyltransferase (SpoU) family protein
Glyma.08G081300	23	0.0147426	PF02585	N-acetylglucosaminylphosphatidylinositol de-N-acetylase family protein
Glyma.17G024600	23	0.0150129	PF00249,PF06584	DNA binding
Glyma.13G337800	23	0.017111	PF03152	Ubiquitin fusion degradation UFD1 family protein
Glyma.03G027900	23	0.017111	PF00814	glycoprotease 1
Glyma.01G228900	23	0.0230316	PF03810,PF08389,PF08767	exportin 1A
Glyma.05G241800	23	0.0364535		zinc finger (C2H2 type) family protein
Glyma.15G163800	22.625	0.00157162	PF06862
Glyma.18G274100	22.6	0.0010888	PF14817
Glyma.20G079100	22.5	0.0106072	PF12998	RING/FYVE/PHD zinc finger superfamily protein
Glyma.12G075800	22.5	0.0106072	PF00046,PF01852,PF08670	Homeobox-leucine zipper family protein / lipid-binding START domain-containing protein
Glyma.06G070700	22.5	0.0462647	PF00025	RAN GTPase 3
Glyma.15G020900	22.45	0.000763389	PF00365	phosphofructokinase 3
Glyma.08G166200	22.4211	0.0016243	PF14541	Eukaryotic aspartyl protease family protein
Glyma.18G208100	22.3333	0.00643659	PF00481	Protein phosphatase 2C family protein
Glyma.12G135700	22.3333	0.0187302	PF12624
Glyma.08G156800	22.1	0.00301106	PF04652,PF14288,PF02364	callose synthase 5
Glyma.18G263200	22	0.00119557	PF00664,PF00005	multidrug resistance-associated protein 3
Glyma.11G085500	22	0.00552315	PF02042	RWP-RK domain-containing protein
Glyma.08G114800	22	0.00908356	PF01195	Peptidyl-tRNA hydrolase family protein
Glyma.16G104600	22	0.00952906	PF00069	Protein kinase superfamily protein
Glyma.20G143600	22	0.0101966	PF08263,PF12819	Leucine-rich repeat (LRR) family protein
Glyma.12G007900	22	0.0101966		PHD finger family protein
Glyma.14G223100	22	0.0123655	PF00240	Ubiquitin-like superfamily protein
Glyma.04G151500	22	0.0157435	PF03357	SNF7 family protein
Glyma.15G166600	22	0.0165267	PF00013	RNA-binding KH domain-containing protein
Glyma.05G095400	22	0.0170066	PF00210	ferritin 2
Glyma.17G117600	22	0.0170066		RNA polymerase II transcription mediators
Glyma.16G025200	22	0.0170066	PF00534,PF15924	UDP-Glycosyltransferase superfamily protein
Glyma.04G066400	22	0.0214726	PF01417,PF07651	epsin N-terminal homology (ENTH) domain-containing protein / clathrin assembly protein-related
Glyma.15G136300	22	0.0214726	PF00397,PF04851,PF00271	DEAD box RNA helicase family protein
Glyma.04G157200	22	0.0320147	PF00027,PF00520	cyclic nucleotide-gated channel 17
Glyma.05G111100	22	0.0320147	PF00076,PF14111
Glyma.02G125200	21.8333	0.004401	PF00010	basic helix-loop-helix (bHLH) DNA-binding superfamily protein
Glyma.17G022300	21.8333	0.0162852	PF04851,PF00271,PF14619	P-loop containing nucleoside triphosphate hydrolases superfamily protein
Glyma.18G146600	21.8182	0.000479153	PF00225	kinesin like protein for actin based chloroplast movement 1
Glyma.02G216000	21.8	0.00547161	PF00627,PF14377,PF06012,PF06025,PF00632	ubiquitin-protein ligase 1
Glyma.01G022400	21.6667	0.0195822	PF00069	Protein kinase superfamily protein
Glyma.08G126900	21.6667	0.0265706	PF02990	transmembrane nine 1
Glyma.03G211200	21.625	0.000437851	PF07496	CW-type Zinc Finger
Glyma.05G002000	21.6	0.00524083	PF05701	Plant protein of unknown function (DUF827)
Glyma.09G084300	21.6	0.00757276		Outer arm dynein light chain 1 protein
Glyma.06G008500	21.5	0.00810223	PF14392,PF00098	zinc knuckle (CCHC-type) family protein
Glyma.04G098500	21.5	0.00921886
Glyma.15G253800	21.5	0.00997371	PF00271,PF00270,PF02889	U5 small nuclear ribonucleoprotein helicase, putative
Glyma.10G274000	21.5	0.00997371
Glyma.07G063300	21.5	0.00997371	PF00931	NB-ARC domain-containing disease resistance protein
Glyma.17G249900	21.5	0.0116758	PF02213	GYF domain-containing protein
Glyma.12G083300	21.5	0.0116758	PF00637	vacuolar protein sorting 41
Glyma.09G097600	21.5	0.020334	PF05182	homolog of yeast FIP1 [V]
Glyma.13G135900	21.5	0.0288086	PF06203,PF00072	pseudo-response regulator 7
Glyma.03G004900	21.5	0.0288086	PF04818	ENTH/VHS family protein
Glyma.13G218500	21.5	0.0386321	PF00888	cullin4
Glyma.07G066600	21.3333	0.00885565	PF00069	Protein kinase superfamily protein
Glyma.17G038700	21.3	0.00468187	PF12711,PF00225	phragmoplast orienting kinesin 1
Glyma.17G105500	21.2222	0.0102417	PF13639	RING/U-box superfamily protein
Glyma.17G044000	21.2	0.00223318	PF16206,PF16213,PF09324,PF12783,PF01369	HOPM interactor 7
Glyma.11G224200	21.1831	0.00282158	PF00854	Major facilitator superfamily protein
Glyma.10G018000	21.1053	0.00301884	PF01699	magnesium/proton exchanger
Glyma.08G156400	21	0.00185944	PF00454	phosphatidylinositol 4-OH kinase beta1
Glyma.18G210100	21	0.00494668	PF03127,PF00790	ENTH/VHS/GAT family protein
Glyma.13G273300	21	0.00954658	PF13771,PF00004	P-loop containing nucleoside triphosphate hydrolases superfamily protein
Glyma.10G049300	21	0.0112134	PF00855	Tudor/PWWP/MBT superfamily protein
Glyma.19G248600	21	0.0112134	PF13499	Calcium-binding EF-hand family protein
Glyma.18G234700	21	0.0175617	PF04851,PF08880,PF00271	transcription regulatory protein SNF2, putative
Glyma.01G209300	21	0.0175617	PF12932,PF12931	RGPR-related
Glyma.04G074300	21	0.0175617	PF13423	ubiquitin-specific protease 26
Glyma.04G043300	21	0.0175617	PF08513,PF00400	WD-40 repeat family protein
Glyma.13G108100	21	0.0175617	PF02450	phospholipid:diacylglycerol acyltransferase
Glyma.05G185000	21	0.0175617	PF13725,PF08351,PF05127,PF13718	Domain of unknown function (DUF1726) ;Putative ATPase (DUF699)
Glyma.17G143400	21	0.0175617	PF01987	Tryptophan RNA-binding attenuator protein-like
Glyma.08G302400	21	0.0182428	PF02847	MIF4G domain-containing protein / MA3 domain-containing protein
Glyma.13G178200	21	0.0182428	PF10374,PF10373	Telomerase activating protein Est1
Glyma.02G276000	21	0.0206268	PF00069	cyclin-dependent kinase C;1
Glyma.08G139600	21	0.0206268	PF04818	ENTH/VHS family protein
Glyma.07G198200	21	0.02441	PF10374,PF10373	Telomerase activating protein Est1
Glyma.06G209700	21	0.0288431	PF01008	NagB/RpiA/CoA transferase-like superfamily protein
Glyma.16G181000	21	0.0288431	PF14531	Protein kinase superfamily protein
Glyma.06G093000	21	0.046605	PF13812,PF13041	Pentatricopeptide repeat (PPR) superfamily protein
Glyma.08G192400	21	0.046605
Glyma.17G256100	21	0.046605	PF00330	isopropyl malate isomerase large subunit 1
Glyma.11G041400	21	0.046605	PF00335	tobamovirus multiplication 2A
Glyma.16G221700	20.8	0.00191506	PF08147,PF00271,PF00270	hydrolases, acting on acid anhydrides, in phosphorus-containing anhydrides;ATP-dependent helicases;nucleic acid binding;ATP binding;RNA binding;helicases
Glyma.01G054100	20.8	0.00470198		Transducin/WD40 repeat-like superfamily protein
Glyma.07G163000	20.7143	0.00400461
Glyma.18G077700	20.7059	0.00325069	PF08766	DEK domain-containing chromatin associated protein
Glyma.02G073400	20.6667	0.00249226
Glyma.07G199200	20.6364	0.00133737	PF00153	Mitochondrial substrate carrier family protein
Glyma.08G313100	20.5	0.0101008	PF00271,PF00270	DEA(D/H)-box RNA helicase family protein
Glyma.01G070300	20.5	0.0109667	PF01928,PF00485	Phosphoribulokinase / Uridine kinase family
Glyma.09G088300	20.5	0.0109667	PF03031	SCP1-like small phosphatase 4
Glyma.13G186600	20.5	0.0129302	PF00083	zinc induced facilitator-like 1
Glyma.09G278600	20.3333	0.00271449	PF03127,PF00790	ENTH/VHS/GAT family protein
Glyma.14G216900	20.3333	0.0315326	PF13450,PF04433	LSD1-like 3
Glyma.11G256200	20.25	0.00448373	PF00271,PF00270	P-loop containing nucleoside triphosphate hydrolases superfamily protein
Glyma.08G288900	20.25	0.0167965		NHL domain-containing protein
Glyma.04G090200	20.2222	0.00930266
Glyma.12G008500	20.1429	0.00106206	PF07227,PF16312	Protein of unknown function (DUF1423)
Glyma.05G046000	20.1429	0.00583855	PF00069	Protein kinase superfamily protein
Glyma.10G062700	20	0.00374812	PF16135	Acyl-CoA N-acyltransferase with RING/FYVE/PHD-type zinc finger domain
Glyma.02G124500	20	0.0102029	PF02518,PF00183	Chaperone protein htpG family protein
Glyma.U031300	20	0.0124072	PF04836,PF05004	interferon-related developmental regulator family protein / IFRD protein family
Glyma.03G188600	20	0.0131806	PF10312,PF09732
Glyma.18G094500	20	0.0189278		zinc finger (C2H2 type) family protein
Glyma.01G032100	20	0.0189278	PF02883,PF01602	Adaptor protein complex AP-1, gamma subunit
Glyma.06G087500	20	0.0189278	PF00069	Protein kinase family protein
Glyma.20G099600	20	0.0205724	PF00133	methionyl-tRNA synthetase / methionine--tRNA ligase / MetRS (cpMetRS)
Glyma.13G064500	20	0.0205724	PF00400	TBP-associated factor 5
Glyma.04G064900	20	0.0206114	PF00515,PF00564,PF13414	Octicosapeptide/Phox/Bem1p (PB1) domain-containing protein / tetratricopeptide repeat (TPR)-containing protein
Glyma.17G150300	20	0.0206114	PF01467	nicotinate/nicotinamide mononucleotide adenyltransferase
Glyma.05G192800	20	0.0264844
Glyma.15G069400	20	0.0296337	PF00400,PF13925	Transducin/WD40 repeat-like superfamily protein
Glyma.16G173700	20	0.0296337	PF05496	P-loop containing nucleoside triphosphate hydrolases superfamily protein
Glyma.06G139100	20	0.0407569		double-stranded DNA binding
Glyma.01G217800	20	0.0409552
Glyma.15G253100	20	0.0409552	PF07967	IAP-like protein 1
Glyma.19G007300	20	0.0409552	PF14531	Protein kinase superfamily protein
Glyma.02G160100	20	0.0409552	PF10513	Enhancer of polycomb-like transcription factor protein
Glyma.13G146900	20	0.0409552	PF01937,PF03630	pantothenate kinase 2
Glyma.13G011100	20	0.0409552
Glyma.17G121400	19.8636	0.00336119	PF01624,PF05188,PF05190,PF05192,PF00488	MUTS homolog 2
Glyma.08G223000	19.8333	0.00198464	PF08700,PF16528	exocyst complex component 84B
Glyma.08G016600	19.7	0.00181189	PF04749	PLAC8 family protein
Glyma.10G135600	19.6667	0.00596767	PF00646	F-box/RNI-like superfamily protein
Glyma.01G094200	19.6667	0.00684565	PF02847,PF02854	eukaryotic translation initiation factor 4G
Glyma.11G182900	19.6667	0.0277467	PF00076	RNA-binding (RRM/RBD/RNP motifs) family protein
Glyma.04G091700	19.6	0.0274365	PF01753,PF13423	ubiquitin-specific protease 16
Glyma.08G161000	19.5	0.00327387	PF07722,PF06418	CTP synthase family protein
Glyma.17G170300	19.5	0.00490012	PF00847	Integrase-type DNA-binding superfamily protein
Glyma.18G120100	19.5	0.0121336	PF04765	Protein of unknown function (DUF616)
Glyma.08G196200	19.5	0.0121336	PF02812,PF00208	Amino acid dehydrogenase family protein
Glyma.15G196400	19.5	0.014417	PF03031	SCP1-like small phosphatase 4
Glyma.11G241400	19.5	0.0263603	PF01189	S-adenosyl-L-methionine-dependent methyltransferases superfamily protein
Glyma.09G212700	19.5	0.0499993
Glyma.05G064100	19.5	0.0499993	PF00036	calcium-dependent protein kinase 29
Glyma.09G128100	19.5	0.0499993		Nucleolar GTP-binding protein
Glyma.17G253000	19.4737	0.000319394	PF03765,PF00650	Sec14p-like phosphatidylinositol transfer family protein
Glyma.20G013500	19.4167	0.00406806	PF00118,PF01504	FORMS APLOID AND BINUCLEATE CELLS 1C
Glyma.04G236700	19.3333	0.01258
Glyma.16G137800	19.2128	0.0010299		Chaperone DnaJ-domain superfamily protein
Glyma.01G084800	19.2069	0.00025023	PF01490	Transmembrane amino acid transporter family protein
Glyma.19G083100	19.1429	0.000525163	PF00135	alpha/beta-Hydrolases superfamily protein
Glyma.14G214700	19	0.000566863	PF08263,PF00069	receptor-like kinase 1
Glyma.16G182200	19	0.0023525
Glyma.11G005500	19	0.00423622	PF00628,PF16135	Acyl-CoA N-acyltransferase with RING/FYVE/PHD-type zinc finger protein
Glyma.09G180300	19	0.0133382	PF13639	RING/U-box superfamily protein
Glyma.04G073900	19	0.0138224		DDB1-CUL4 associated factor 1
Glyma.17G015200	19	0.0176119	PF00514,PF13855,PF01734	phospholipases;galactolipases
Glyma.09G094100	19	0.0214025
Glyma.10G292400	19	0.0235459
Glyma.11G033600	19	0.0235459	PF05641	G2484-1 protein
Glyma.09G117300	19	0.0254711	PF08659	NAD(P)-binding Rossmann-fold superfamily protein
Glyma.14G171600	19	0.036793	PF13850,PF07970	Endoplasmic reticulum vesicle transporter protein
Glyma.10G222200	19	0.0467245	PF00069	Protein kinase superfamily protein
Glyma.06G094900	19	0.0467245	PF00400	transducin family protein / WD-40 repeat family protein
Glyma.19G144900	19	0.0467245	PF12695
Glyma.07G226700	18.8333	0.0013422	PF03763	Remorin family protein
Glyma.U027900	18.7778	0.000841838	PF14360	Arabidopsis Inositol phosphorylceramide synthase 1
Glyma.04G187900	18.75	0.00167281	PF02893,PF00168,PF16016	C2 calcium/lipid-binding and GRAM domain containing protein
Glyma.18G109600	18.7333	0.003096	PF03188	Cytochrome b561/ferric reductase transmembrane protein family
Glyma.10G284400	18.6667	0.00231387	PF07714	ACT-like protein tyrosine kinase family protein
Glyma.01G112200	18.6667	0.00277866	PF13676,PF00931	Disease resistance protein (TIR-NBS-LRR class) family
Glyma.13G214900	18.6471	0.0072138	PF00646,PF01167	tubby like protein 3
Glyma.10G224900	18.5	0.00299194	PF00646,PF01167	tubby like protein 10
Glyma.12G237700	18.5	0.013519	PF13639	RING/U-box superfamily protein
Glyma.08G293700	18.5	0.043234
Glyma.13G044100	18.4118	0.0160652	PF02458	HXXXD-type acyl-transferase family protein
Glyma.12G077400	18.3333	0.00305713		ATP-dependent helicase family protein
Glyma.04G124300	18.3333	0.00835033	PF04434,PF10551,PF03101	far-red elongated hypocotyls 3
Glyma.07G175000	18.2857	0.00924193	PF07722	anthranilate synthase beta subunit 1
Glyma.12G022300	18.16	0.0195089	PF00202	Pyridoxal phosphate (PLP)-dependent transferases superfamily protein
Glyma.10G102800	18	0.00235194	PF03485	Arginyl-tRNA synthetase, class Ic
Glyma.13G091900	18	0.0037316	PF13857,PF12796	XB3 ortholog 2 in Arabidopsis thaliana
Glyma.07G036600	18	0.00395141	PF06972	Kinase-related protein of unknown function (DUF1296)
Glyma.18G286600	18	0.00808744	PF00005,PF00664	P-glycoprotein 20
Glyma.06G081300	18	0.00915251	PF00743	Flavin-binding monooxygenase family protein
Glyma.03G113500	18	0.013322	PF01239	Protein prenylyltransferase superfamily protein
Glyma.12G180600	18	0.013508	PF02883,PF02296,PF01602	Adaptor protein complex AP-2, alpha subunit
Glyma.15G245600	18	0.0155183	PF00168	Calcium-dependent lipid-binding (CaLB domain) family protein
Glyma.01G200700	18	0.0233463	PF00335	tobamovirus multiplication 2A
Glyma.10G201000	18	0.0255428	PF02817,PF00364,PF00198	Dihydrolipoamide acetyltransferase, long form protein
Glyma.14G213000	18	0.0255428		CCCH-type zinc finger family protein
Glyma.02G122200	18	0.0255428		Chaperone DnaJ-domain superfamily protein
Glyma.10G216200	18	0.0336054	PF00226,PF12572	DNAJ heat shock N-terminal domain-containing protein
Glyma.10G233500	18	0.0336054	PF04564,PF07714	U-box domain-containing protein kinase family protein
Glyma.08G223700	18	0.0336054	PF14531	Protein kinase superfamily protein
Glyma.13G174200	18	0.0336054	PF02841,PF02263	Guanylate-binding family protein
Glyma.16G008300	18	0.0336054	PF13920,PF12483	E3 Ubiquitin ligase family protein
Glyma.03G211500	18	0.0395172	PF00046	Homeodomain-like superfamily protein
Glyma.10G102200	17.8333	0.00319034	PF15477
Glyma.01G142700	17.7778	0.00234433	PF00270,PF07717,PF00271,PF04408	RNA helicase family protein
Glyma.19G243700	17.7143	0.00271399	PF13178,PF00612	IQ-domain 19
Glyma.04G061700	17.6667	0.00825009
Glyma.14G032500	17.6667	0.0123462		maternal effect embryo arrest 22
Glyma.20G229000	17.6667	0.0146143	PF00291	cysteine synthase D1
Glyma.17G080100	17.6	0.00591074	PF13418,PF13415	Galactose oxidase/kelch repeat superfamily protein
Glyma.09G121700	17.5556	0.00381072	PF00069	Protein kinase superfamily protein
Glyma.08G127200	17.5	0.0138108	PF01501,PF06427	UDP-glucose:glycoprotein glucosyltransferases;transferases, transferring hexosyl groups;transferases, transferring glycosyl groups
Glyma.03G169500	17.5	0.0138108	PF02736,PF00612,PF01843,PF00063	myosin XI B
Glyma.06G179400	17.5	0.0151823	PF17098	FKBP12 interacting protein 37
Glyma.20G070600	17.5	0.0151823
Glyma.13G288200	17.5	0.0151823	PF09756
Glyma.07G037400	17.5	0.0151823	PF13087,PF13086	P-loop containing nucleoside triphosphate hydrolases superfamily protein
Glyma.10G005700	17.5	0.035567	PF04147
Glyma.05G205900	17.4062	0.000865005	PF03763	Remorin family protein
Glyma.09G276800	17.3333	0.00588154	PF00860	AZA-guanine resistant1
Glyma.14G184500	17.3333	0.0136355	PF00464	serine hydroxymethyltransferase 2
Glyma.07G042100	17.3333	0.0194497	PF12090
Glyma.04G194900	17.3333	0.0348052	PF05496,PF00498	AAA-type ATPase family protein
Glyma.16G201500	17.25	0.00120576	PF00069,PF07714	Protein kinase superfamily protein
Glyma.19G065400	17.25	0.00365244	PF00855	Tudor/PWWP/MBT superfamily protein
Glyma.08G303400	17	0.00165551
Glyma.08G143200	17	0.00336293	PF14649
Glyma.03G006100	17	0.0151924		GDSL-like Lipase/Acylhydrolase superfamily protein
Glyma.07G069400	17	0.0241425	PF04851,PF08880,PF00271	transcription regulatory protein SNF2, putative
Glyma.11G060300	17	0.0268554	PF00503	extra-large G-protein 1
Glyma.20G174000	17	0.0324125	PF11961,PF05003	Protein of unknown function (DUF668)
Glyma.20G130800	17	0.0324125	PF00628,PF00046	Homeodomain-like protein with RING/FYVE/PHD-type zinc finger domain
Glyma.03G186500	17	0.0324125	PF04003,PF00400	transducin family protein / WD-40 repeat family protein
Glyma.07G210600	17	0.0324125	PF00069	CDPK-related kinase
Glyma.17G112700	17	0.0324125	PF00005	general control non-repressible 4
Glyma.08G037000	17	0.0480438	PF00400,PF04564	Transducin/WD40 repeat-like superfamily protein
Glyma.03G142700	17	0.0480438	PF07986	Tubulin binding cofactor C domain-containing protein
Glyma.05G078300	17	0.0480438	PF00174	sulfite oxidase
Glyma.16G038800	17	0.0480438	PF00076	RNA binding (RRM/RBD/RNP motifs) family protein
Glyma.09G199900	16.8	0.00765507	PF00069	Protein kinase superfamily protein
Glyma.19G049500	16.7143	0.00423636	PF10513	Enhancer of polycomb-like transcription factor protein
Glyma.09G086800	16.6818	0.0010843	PF04137	endoplasmic reticulum oxidoreductins 2
Glyma.03G188200	16.6667	0.00830356	PF00076,PF14111
Glyma.06G018700	16.6667	0.00944329
Glyma.14G217400	16.6667	0.0127356	PF00270,PF00271,PF00575,PF07717,PF04408	RNA helicase family protein
Glyma.09G279400	16.6667	0.0153415	PF14938	alpha-soluble NSF attachment protein 2
Glyma.13G158400	16.5714	0.00295819		Transducin family protein / WD-40 repeat family protein
Glyma.20G055400	16.5	0.00211078
Glyma.12G192700	16.5	0.00317726	PF00097,PF00271,PF00176	Helicase protein with RING/U-box domain
Glyma.03G057600	16.5	0.0155761	PF11935,PF12295	HEAT repeat-containing protein
Glyma.04G058300	16.5	0.0172054	PF01753,PF13423	ubiquitin-specific protease 19
Glyma.08G019800	16.5	0.0285156
Glyma.09G002400	16.3333	0.0099253	PF00069	Protein kinase family protein with ARM repeat domain
Glyma.07G204700	16.3333	0.0106201	PF12923
Glyma.15G025400	16.3333	0.0232194	PF13178,PF00612	IQ-domain 8
Glyma.05G237500	16.3017	0.000190026	PF13639,PF05495,PF14599,PF01814	zinc finger protein-related
Glyma.04G111900	16.3	0.00162712	PF16544	RNA-binding KH domain-containing protein
Glyma.08G257500	16.2727	0.00546414	PF13837	Homeodomain-like superfamily protein
Glyma.01G063600	16.25	0.0019783	PF08620,PF08621
Glyma.13G042100	16.25	0.00694001	PF00481	Protein phosphatase 2C family protein
Glyma.18G213600	16.1538	0.000534986	PF08263,PF00560,PF13855,PF00069	Leucine-rich receptor-like protein kinase family protein
Glyma.10G051800	16.1455	0.000790012	PF12906	RING/U-box superfamily protein
Glyma.07G194500	16	0.0052534	PF07814	WAPL (Wings apart-like protein regulation of heterochromatin) protein
Glyma.02G280500	16	0.00789555	PF13167,PF01926,PF16360	GTP-binding protein, HflX
Glyma.01G077400	16	0.0106287	PF04987	transferases;sulfuric ester hydrolases;catalytics;transferases
Glyma.06G255000	16	0.0163926	PF13423,PF02148,PF00627	ubiquitin-specific protease 14
Glyma.03G014900	16	0.0163926	PF04851,PF00271	DEA(D/H)-box RNA helicase family protein
Glyma.13G201200	16	0.0172496		RING/U-box superfamily protein
Glyma.15G027900	16	0.0201063	PF00564,PF02042	Plant regulator RWP-RK family protein
Glyma.08G227500	16	0.0269054	PF04434,PF03101,PF10551	FAR1-related sequence 3
Glyma.18G296100	16	0.029776	PF00076	RNA-binding (RRM/RBD/RNP motifs) family protein
Glyma.01G179100	16	0.029776	PF07714	Protein kinase superfamily protein
Glyma.15G140800	16	0.029776	PF05182	homolog of yeast FIP1 [V]
Glyma.06G148300	16	0.029776	PF01399	26S proteasome regulatory subunit, putative (RPN5)
Glyma.04G155400	16	0.0327886	PF04576	Protein of unknown function, DUF593
Glyma.15G256700	16	0.0327886	PF13579,PF13692	UDP-Glycosyltransferase superfamily protein
Glyma.02G312100	16	0.0327886
Glyma.07G250000	16	0.0327886	PF00642	Zinc finger C-x8-C-x5-C-x3-H type family protein
Glyma.07G055500	16	0.0327886	PF00240,PF00454	phosphoinositide 4-kinase gamma 4
Glyma.08G113200	16	0.0374175	PF00149	protein phosphatase 2A-3
Glyma.11G107300	16	0.0389644	PF17047,PF00168	Calcium-dependent lipid-binding (CaLB domain) family protein
Glyma.04G221900	16	0.0441707	PF13638,PF00773	ribonuclease II family protein
Glyma.10G146100	16	0.0441707	PF12368,PF03959
Glyma.08G331900	16	0.0441707	PF01000,PF01193	RNA polymerase I subunit 43
Glyma.02G144200	15.9	0.0071909	PF00400,PF14844,PF02138	Beige/BEACH domain ;WD domain, G-beta repeat protein
CYP98A2	15.9	0.0324241	PF00067	CYTOCHROME P450 98A3-RELATED
Glyma.15G016700	15.8	0.00159018	PF12329,PF12325	golgin candidate 5
Glyma.U001700	15.75	0.00649578	PF00005,PF12698	ABC2 homolog 7
Glyma.03G055900	15.75	0.0101459	PF00962	AMP deaminase, putative / myoadenylate deaminase, putative
Glyma.20G126100	15.75	0.0194774	PF04676,PF04677	CwfJ-like family protein
Glyma.08G354500	15.6667	0.0108215	PF08513,PF00400	LEUNIG_homolog
Glyma.13G324500	15.6667	0.0133616	PF00271	ATP-dependent helicase family protein
Glyma.12G036400	15.6	0.00155697	PF00170	Basic-leucine zipper (bZIP) transcription factor family protein
Glyma.10G007600	15.5556	0.0045158	PF02451
Glyma.15G261000	15.5526	0.00476839
Glyma.08G010100	15.5	0.0022394	PF00240	Ubiquitin family protein
Glyma.06G075000	15.5	0.00588694		DDB1-CUL4 associated factor 1
Glyma.05G106000	15.5	0.0118125	PF00249,PF00538	Homeodomain-like/winged-helix DNA-binding family protein
Glyma.01G230400	15.5	0.017745	PF04749	PLAC8 family protein
Glyma.17G136900	15.5	0.019702	PF09335	SNARE associated Golgi protein family
Glyma.12G110600	15.5	0.0496889	PF07690	Major facilitator superfamily protein
Glyma.10G212600	15.4	0.00577814	PF00249	Duplicated homeodomain-like superfamily protein
Glyma.12G068500	15.4	0.0140752	PF14531	geminivirus rep interacting kinase 2
Glyma.10G161000	15.3929	0.0249135	PF03096	N-MYC downregulated-like 1
Glyma.14G112400	15.3846	0.000482652	PF03789,PF03790,PF05920,PF03791	KNOTTED1-like homeobox gene 3
Glyma.14G001200	15.3333	0.00116468	PF13202,PF12763	Calcium-binding EF hand family protein
Glyma.15G053400	15.3333	0.0154895	PF02705	K+ uptake permease 7
Glyma.02G026700	15.3333	0.0375755	PF08295,PF02671,PF16879	SIN3-like 4
Glyma.07G067000	15.3143	0.000723764	PF12708	Pectin lyase-like superfamily protein
Glyma.06G310500	15.25	0.00931624	PF12705,PF13086,PF13087	DNA replication helicase, putative
Glyma.01G008700	15.2075	0.000372712	PF05183	RNA-dependent RNA polymerase family protein
Glyma.19G199500	15.2	0.00287109	PF05920,PF07526	BEL1-like homeodomain 1
Glyma.19G208400	15.125	0.00525882	PF07496	CW-type Zinc Finger
Glyma.13G348200	15	0.000688635	PF12710,PF16209,PF16212	ATPase E1-E2 type family protein / haloacid dehalogenase-like hydrolase family protein
Glyma.09G057700	15	0.00195528	PF06862
Glyma.10G225800	15	0.00243173	PF01926,PF03144,PF11987	eukaryotic translation initiation factor 2 (eIF-2) family protein
Glyma.15G236400	15	0.00935428	PF00249	Homeodomain-like protein with RING/FYVE/PHD-type zinc finger domain
Glyma.03G133500	15	0.0180229	PF00226,PF13414	Heat shock protein DnaJ with tetratricopeptide repeat
Glyma.04G211300	15	0.0306581	PF03141	S-adenosyl-L-methionine-dependent methyltransferases superfamily protein
Glyma.18G248600	15	0.0350213	PF01713,PF08590	smr (Small MutS Related) domain-containing protein
Glyma.15G100500	15	0.0350213	PF13920	RING/U-box superfamily protein
Glyma.10G193000	15	0.0350213	PF03909	BSD domain (BTF2-like transcription factors, Synapse-associated proteins and DOS2-like proteins)
Glyma.10G038400	15	0.0350213	PF00433,PF07714	AGC (cAMP-dependent, cGMP-dependent and protein kinase C) kinase family protein
Glyma.10G134600	15	0.0350213	PF00238	Ribosomal protein L14p/L23e family protein
Glyma.06G296800	15	0.0350213	PF08263,PF13855,PF07714	STRUBBELIG-receptor family 3
Glyma.03G226600	15	0.0350213	PF04851,PF00098,PF08152,PF00271	DEAD box RNA helicase (RH3)
Glyma.01G045100	15	0.038046	PF01344	Galactose oxidase/kelch repeat superfamily protein
Glyma.10G023700	15	0.0428423	PF12166
Glyma.09G256600	15	0.0428423	PF01535,PF13041	Pentatricopeptide repeat (PPR) superfamily protein
Glyma.09G174000	15	0.0428423	PF07714	Protein kinase superfamily protein
Glyma.08G305800	15	0.0428423
Glyma.13G097600	15	0.0428423	PF12937,PF13426,PF07646,PF13415,PF13418	Galactose oxidase/kelch repeat superfamily protein
Glyma.17G059700	15	0.0428423	PF00566	Ypt/Rab-GAP domain of gyp1p superfamily protein
Glyma.17G097200	15	0.0428423
Glyma.16G221300	15	0.0428423	PF01535,PF13041	Pentatricopeptide repeat (PPR-like) superfamily protein
Glyma.14G004300	14.9167	0.000358713	PF00293	nudix hydrolase homolog 2
Glyma.15G212200	14.8571	0.0186981
Glyma.06G196900	14.8462	0.000630823	PF07714	Protein kinase superfamily protein
Glyma.06G003600	14.8333	0.00209713	PF00632	HEAT repeat ;HECT-domain (ubiquitin-transferase)
Glyma.11G024700	14.8333	0.00462719	PF08263,PF07714	Leucine-rich repeat protein kinase family protein
Glyma.03G218300	14.75	0.00585567	PF01556,PF00226	DNAJ heat shock family protein
Glyma.10G289800	14.6667	0.0123243	PF04762	IKI3 family protein
Glyma.13G080300	14.6667	0.0123243		ARM repeat superfamily protein
Glyma.02G085500	14.6667	0.0143031	PF07058	microtubule-associated proteins 70-2
Glyma.12G129800	14.6667	0.0228251	PF02358,PF00982	trehalose-phosphatase/synthase 7
Glyma.13G227200	14.6667	0.0311773	PF00400	Transducin/WD40 repeat-like superfamily protein
Glyma.17G128200	14.6667	0.0499042	PF00069	Protein kinase superfamily protein
Glyma.03G211400	14.6	0.0101578	PF10557,PF00888	cullin 1
Glyma.12G067700	14.5556	0.00102823	PF13848,PF00085	PDI-like 1-4
Glyma.15G169800	14.5	0.00259944	PF00400,PF12265	Transducin family protein / WD-40 repeat family protein
Glyma.10G127400	14.5	0.0029184	PF08543	hydroxyethylthiazole kinase family protein
Glyma.15G192300	14.5	0.00358501	PF07928	VPS54
Glyma.07G069000	14.5	0.0040945	PF00954,PF01453,PF00069	receptor-like protein kinase 4
Glyma.04G130300	14.5	0.0040945	PF11717,PF01853	histone acetyltransferase of the MYST family 1
Glyma.02G175400	14.5	0.00980215	PF03311	Cornichon family protein
Glyma.11G107500	14.5	0.010776	PF00632	HEAT repeat ;HECT-domain (ubiquitin-transferase)
Glyma.01G050400	14.5	0.022835		RING/U-box superfamily protein
Glyma.09G282700	14.5	0.022835	PF00067	cytochrome P450, family 86, subfamily B, polypeptide 1
Glyma.04G192200	14.5	0.0284913	PF11934,PF01857,PF01858	retinoblastoma-related 1
Glyma.17G109600	14.5	0.0284913	PF07714	calmodulin-binding receptor-like cytoplasmic kinase 3
Glyma.10G209000	14.5	0.0399783	PF00806,PF07990	pumilio 4
Glyma.08G153100	14.5	0.0399783	PF01480,PF00076	RNA binding (RRM/RBD/RNP motifs) family protein
Glyma.17G229100	14.5	0.0476157	PF07714,PF14381	Protein kinase superfamily protein
Glyma.13G128500	14.4	0.00229719	PF13921	myb family transcription factor
Glyma.12G013200	14.4	0.00358648	PF07690	phosphate starvation-induced gene 3
Glyma.05G136000	14.4	0.00575815	PF08265,PF05764	sequence-specific DNA binding transcription factors;DNA binding;DNA binding
Glyma.16G096700	14.4	0.00662085	PF12937,PF00022	actin-related protein 8
Glyma.06G074400	14.3636	0.0475024	PF04570	Protein of unknown function (DUF581)
Glyma.15G266600	14.2727	0.00165752	PF07722,PF06418	CTP synthase family protein
Glyma.15G199800	14.2	0.00806035
Glyma.05G090500	14.2	0.0225886		Transducin/WD40 repeat-like superfamily protein
Glyma.10G187600	14.1667	0.0324335
Glyma.08G071200	14.1333	0.00161421	PF00005,PF01061	white-brown complex homolog protein 11
Glyma.05G018800	14.125	0.00663714	PF00319,PF01486	AGAMOUS-like 8
Glyma.10G284500	14.1014	0.00988437	PF10497,PF02373	Transcription factor jumonji (jmjC) domain-containing protein
Glyma.02G165400	14.0667	0.000380659	PF00270	P-loop containing nucleoside triphosphate hydrolases superfamily protein
Glyma.17G246600	14	0.0148386	PF04129,PF15277,PF09763	exocyst complex component sec3A
Glyma.17G088200	14	0.0159003	PF04006
Glyma.01G006400	14	0.0230263	PF03485,PF05746,PF00750	Arginyl-tRNA synthetase, class Ic
Glyma.10G257100	14	0.0230263		cyclin-related
Glyma.17G176300	14	0.0254101		Transducin/WD40 repeat-like superfamily protein
Glyma.20G181000	14	0.0272862	PF02375,PF02373	Zinc finger (C2H2 type) family protein / transcription factor jumonji (jmj) family protein
Glyma.03G178500	14	0.0272862	PF00270,PF00271	P-loop containing nucleoside triphosphate hydrolases superfamily protein
Glyma.08G060600	14	0.0356458	PF13812,PF12854,PF13041	Pentatricopeptide repeat (PPR) superfamily protein
Glyma.02G147600	14	0.036824	PF08355,PF08356	MIRO-related GTP-ase 2
Glyma.17G211100	14	0.036824	PF06886	TPX2 (targeting protein for Xklp2) protein family
Glyma.04G122100	14	0.0397459	PF00861	Ribosomal L18p/L5e family protein
Glyma.07G133000	14	0.0397459		TRF-like 2
Glyma.08G134400	14	0.0439648	PF00684,PF01556,PF00226	DNAJ heat shock family protein
Glyma.05G129300	14	0.0439648	PF06454
Glyma.12G114000	14	0.0439648	PF00069	Protein kinase superfamily protein
Glyma.09G206000	14	0.048433	PF09335	SNARE associated Golgi protein family
Glyma.02G090100	13.9726	0.00190011	PF01554	MATE efflux family protein
Glyma.04G192300	13.9231	0.000317106	PF14288,PF02364	glucan synthase-like 8
Glyma.12G230800	13.8571	0.019695	PF04859	Plant protein of unknown function (DUF641)
Glyma.04G003000	13.8	0.00276321		ARM repeat superfamily protein
Glyma.15G063700	13.75	0.00545667
Glyma.07G192500	13.7407	0.001119	PF13923,PF00271,PF00176	SNF2 domain-containing protein / helicase domain-containing protein / zinc finger protein-related
Glyma.20G036600	13.6977	0.000519326	PF07891	Protein of unknown function (DUF1666)
Glyma.04G172900	13.6696	0.00296227	PF13304	ABC2 homolog 6
Glyma.15G069300	13.6667	0.00540316	PF00249,PF00439	bromodomain 4
Glyma.18G274000	13.6667	0.00696328	PF12678	RING/U-box superfamily protein
Glyma.02G146500	13.6667	0.00725369	PF16135	Acyl-CoA N-acyltransferase with RING/FYVE/PHD-type zinc finger protein
Glyma.06G156600	13.6667	0.0126352	PF01490	amino acid permease 2
Glyma.09G234500	13.6667	0.0144932	PF02862	shoot gravitropism 2 (SGR2)
Glyma.08G152100	13.6667	0.0181052	PF00684,PF00226,PF01556	gametophytic factor 2
Glyma.15G118900	13.6667	0.0183734	PF00293	nudix hydrolase homolog 2
Glyma.08G336400	13.6667	0.0448478	PF11919,PF16507	proteasome activating protein 200
Glyma.01G028700	13.6	0.0356719	PF08263,PF00069	NSP-interacting kinase 3
Glyma.06G307700	13.5882	0.00211384	PF03106	WRKY family transcription factor
Glyma.19G254900	13.5455	0.00670342	PF00035,PF02170,PF00636	dicer-like 2
Glyma.14G071900	13.5333	0.000643687	PF03765,PF00650	Sec14p-like phosphatidylinositol transfer family protein
Glyma.05G008500	13.5	0.00395009
Glyma.19G235900	13.5	0.0239101	PF04893	Integral membrane Yip1 family protein
Glyma.03G220500	13.5	0.0268425	PF00069	Protein kinase superfamily protein
Glyma.15G222100	13.5	0.0338907	PF03101	FAR1-related sequence 3
Glyma.11G032400	13.5	0.0338907	PF00226,PF11875	DNAJ heat shock N-terminal domain-containing protein
Glyma.14G199000	13.5	0.048523	PF00787,PF09325	sorting nexin 2B
Glyma.02G157800	13.4444	0.0162686	PF08711	Transcription elongation factor (TFIIS) family protein
Glyma.02G196500	13.4412	0.000383079	PF05920,PF07526	BEL1-like homeodomain 1
Glyma.20G166200	13.4211	0.00688332	PF01926,PF03144,PF11987	eukaryotic translation initiation factor 2 (eIF-2) family protein
Glyma.15G025300	13.408	0.0333784		calmodulin-binding family protein
Glyma.02G228000	13.4	0.00778231	PF14416,PF13839	Plant protein of unknown function (DUF828)
Glyma.04G186400	13.4	0.0338177	PF17098	FKBP12 interacting protein 37
Glyma.13G067800	13.3571	0.000505674	PF08295,PF02671,PF16879	SIN3-like 2
Glyma.17G042800	13.3448	0.00181882	PF02309	indole-3-acetic acid inducible 31
Glyma.06G068500	13.3333	0.00589839	PF13259
Glyma.02G304100	13.3333	0.00589839	PF17048,PF04734	Neutral/alkaline non-lysosomal ceramidase
Glyma.13G181400	13.3333	0.00589839	PF07714	Protein kinase superfamily protein
Glyma.17G200600	13.3333	0.0094917	PF08312
Glyma.02G244400	13.3333	0.0113166	PF08263,PF00069	receptor-like kinase 1
Glyma.10G173300	13.3333	0.0157722	PF14555,PF00789	UBX domain-containing protein
Glyma.17G167900	13.3333	0.0217874	PF00929	small RNA degrading nuclease 3
Glyma.10G003800	13.3333	0.0289629	PF00515,PF13414	Tetratricopeptide repeat (TPR)-like superfamily protein
Glyma.08G000200	13.3333	0.0300769
Glyma.01G202600	13.3333	0.0410122	PF13086,PF09416	RNA helicase, putative
Glyma.19G237800	13.3077	0.00279902	PF03917	glutathione synthetase 2
Glyma.06G142300	13.25	0.026427	PF00072	response regulator 17
Glyma.15G102000	13.25	0.0273384	PF03951,PF00120	glutamine synthetase 2
Glyma.13G279400	13.25	0.0357391	PF00400	Transducin/WD40 repeat-like superfamily protein
Glyma.16G051500	13.1818	0.00325638	PF13915,PF13889
Glyma.13G149700	13.0238	0.00447195	PF13837
Glyma.19G056500	13	0.00660559	PF04724	beta-1,4-N-acetylglucosaminyltransferase family protein
Glyma.11G157400	13	0.0147061	PF13445,PF07714,PF13857,PF13637,PF12796	protein kinases;ubiquitin-protein ligases
Glyma.U040600	13	0.0166511	PF00394,PF07731	Cupredoxin superfamily protein
Glyma.04G095600	13	0.0256264
Glyma.15G107800	13	0.0256264	PF13921	Homeodomain-like superfamily protein
Glyma.14G117800	13	0.0256264	PF07728	P-loop containing nucleoside triphosphate hydrolases superfamily protein
Glyma.08G019600	13	0.0256264	PF02705	Potassium transporter family protein
Glyma.13G037600	13	0.0271869	PF01803	SEUSS transcriptional co-regulator
Glyma.17G153700	13	0.0324993	PF10260	ubiquitin family protein
Glyma.16G024100	13	0.0324993		embryo defective 1703
Glyma.04G229400	13	0.0369195	PF07145,PF14259,PF00076	CTC-interacting domain 11
Glyma.02G169200	13	0.044244	PF00149	protein phosphatase 2A-4
Glyma.10G218000	13	0.0481541	PF11961,PF05003	Protein of unknown function (DUF668)
Glyma.06G000800	13	0.0481541	PF03619	Protein of unknown function (DUF300)
Glyma.06G144900	13	0.0481541
Glyma.19G021700	13	0.0481541	PF10350
Glyma.19G078200	13	0.0481541	PF07859	alpha/beta-Hydrolases superfamily protein
Glyma.09G024700	13	0.0481541	PF11721,PF07714	hercules receptor kinase 2
Glyma.02G185000	13	0.0481541	PF08161	ARM repeat superfamily protein
Glyma.13G178100	13	0.0481541	PF02847	MIF4G domain-containing protein / MA3 domain-containing protein
Glyma.13G197000	13	0.0481541	PF00703,PF16353,PF02837,PF02929,PF02836	glycoside hydrolase family 2 protein
Glyma.07G079700	13	0.0481541	PF01656	P-loop containing nucleoside triphosphate hydrolases superfamily protein
Glyma.08G251800	12.876	0.00387631	PF07734,PF00646	F-box family protein
Glyma.08G060500	12.875	0.00322992	PF08276,PF00954,PF01453,PF07714	S-locus lectin protein kinase family protein
Glyma.17G104100	12.8333	0.0319712	PF14709,PF04851,PF02170,PF00271,PF03368,PF00636	dicer-like 4
Glyma.17G257100	12.75	0.024929	PF00098,PF03159	5'-3' exoribonuclease 3
Glyma.09G014600	12.6667	0.00517885		binding
Glyma.10G099200	12.6667	0.00687401	PF02209,PF00626	villin 2
Glyma.13G287000	12.6667	0.0131652	PF12490	homolog of yeast autophagy 18 (ATG18) F
Glyma.07G034300	12.6667	0.0247958	PF07719,PF12569	tetratricopeptide repeat (TPR)-containing protein
Glyma.19G117700	12.6667	0.0475033	PF07741,PF00382	Cyclin/Brf1-like TBP-binding protein
Glyma.19G135300	12.6	0.00252064	PF00226,PF13414	Heat shock protein DnaJ with tetratricopeptide repeat
Glyma.13G135300	12.5833	0.0125316	PF00481	Protein phosphatase 2C family protein
Glyma.07G104200	12.5556	0.0252216	PF00293	nudix hydrolase homolog 4
Glyma.19G069300	12.52	0.000257708	PF13947,PF07714	Protein kinase superfamily protein
Glyma.12G020000	12.5	0.00174922	PF11891	Protein of unknown function (DUF3411)
Glyma.17G038400	12.5	0.00460148	PF04146	evolutionarily conserved C-terminal region 7
Glyma.14G024000	12.5	0.00615696
Glyma.13G059400	12.5	0.0081093		chorismate mutase 1
Glyma.15G261600	12.5	0.0272522	PF00271,PF00270	RNA helicase 36
Glyma.06G275600	12.5	0.0284187	PF02358,PF00982	trehalose-phosphatase/synthase 7
Glyma.13G072500	12.5	0.0284187	PF03571,PF00293	nudix hydrolase homolog 3
HOP1	12.5	0.0284187	PF00515, PF13414	hsp70-Hsp90 organizing protein 1
Glyma.20G217700	12.5	0.0320835		RING/FYVE/PHD zinc finger superfamily protein
Glyma.09G215100	12.5	0.0410056	PF10409,PF02181	actin binding
Glyma.10G135500	12.4149	0.000362265		F-box/RNI-like/FBD-like domains-containing protein
Glyma.09G223300	12.4	0.0382359	PF14370,PF01028,PF02919	DNA topoisomerase 1 beta
Glyma.14G078300	12.3714	0.00163655
Glyma.13G113900	12.3636	0.000601953		alpha/beta-Hydrolases superfamily protein
Glyma.04G219200	12.3636	0.00658615	PF13238	shikimate kinase 1
Glyma.15G028100	12.3333	0.00535197
Glyma.03G052200	12.3333	0.0225031	PF01161	PEBP (phosphatidylethanolamine-binding protein) family protein
Glyma.16G026900	12.25	0.00302147	PF03321	Auxin-responsive GH3 family protein
Glyma.15G267700	12.25	0.00673323	PF13347	Major facilitator superfamily protein
Glyma.08G163700	12.25	0.0155769	PF00171	aldehyde dehydrogenase 5F1
Glyma.10G129800	12.25	0.0339044		transducin family protein / WD-40 repeat family protein
Glyma.11G190900	12.2174	0.00656917	PF16487,PF16488,PF08699,PF02170,PF16486,PF02171	Argonaute family protein
Glyma.13G311800	12.2	0.00287218	PF02485	Core-2/I-branching beta-1,6-N-acetylglucosaminyltransferase family protein
Glyma.15G031900	12.2	0.016374	PF00270,PF00271,PF07717,PF04408	RNA helicase family protein
Glyma.04G000200	12.2	0.0212894	PF00850	histone deacetylase 1
Glyma.10G135300	12.1532	6.77e-05
Glyma.05G025300	12.1429	0.0109623	PF00834	D-ribulose-5-phosphate-3-epimerase
Glyma.04G044000	12.0588	0.0037461	PF01566	NRAMP metal ion transporter 2
Glyma.02G029600	12	0.00297399	PF00226	ARG1-like 1
Glyma.14G087700	12	0.00752147	PF12174,PF05236	TBP-associated factor 4
Glyma.13G259300	12	0.00752147	PF04502	Family of unknown function (DUF572)
Glyma.10G201900	12	0.0110371	PF08700	Vps51/Vps67 family (components of vesicular transport) protein
Glyma.17G129200	12	0.0138398	PF05496,PF00498	AAA-type ATPase family protein
Glyma.13G137000	12	0.0200556	PF00855	Tudor/PWWP/MBT superfamily protein
Glyma.12G225000	12	0.0229281	PF00297	ribosomal protein L3 plastid
Glyma.09G243900	12	0.0294074	PF04727	ELMO/CED-12 family protein
Glyma.07G169400	12	0.0307341
Glyma.14G097800	12	0.0326915	PF10294,PF08242	S-adenosyl-L-methionine-dependent methyltransferases superfamily protein
Glyma.02G144500	12	0.0326915	PF00069,PF00481	Protein phosphatase 2C family protein
Glyma.02G013400	12	0.0326915		Tetratricopeptide repeat (TPR)-like superfamily protein
Glyma.15G013800	12	0.0394168	PF00400,PF04053	Coatomer, beta' subunit
Glyma.10G292700	12	0.0394168	PF06807,PF16573,PF10607,PF16575	LisH/CRA/RING-U-box domains-containing protein
Glyma.16G016700	11.9333	0.0187833	PF02365	NAC transcription factor-like 9
Glyma.11G238500	11.9223	0.00719399	PF01740,PF00916	slufate transporter 2;1
Glyma.08G345400	11.9091	0.00483018	PF03188,PF04526	Auxin-responsive family protein
Glyma.08G044700	11.8033	7.36e-05	PF13639,PF05495,PF14599,PF01814	zinc finger protein-related
Glyma.12G031100	11.8	0.0154468
Glyma.18G077600	11.7407	0.0013715	PF08766	DEK domain-containing chromatin associated protein
Glyma.12G172700	11.7143	0.0107199	PF00069	Protein kinase superfamily protein
Glyma.05G100500	11.6923	0.00309241	PF08513,PF00400	WD-40 repeat family protein
Glyma.08G107500	11.6667	0.00296793	PF00201	indole-3-acetate beta-D-glucosyltransferase
Glyma.13G309700	11.6667	0.00385166	PF14634,PF00271,PF00176	Helicase protein with RING/U-box domain
Glyma.04G000600	11.6667	0.00517075	PF00564,PF02042	Plant regulator RWP-RK family protein
Glyma.03G236900	11.6667	0.00662336	PF00571,PF16561	homolog of yeast sucrose nonfermenting 4
Glyma.14G024100	11.6667	0.00774515
Glyma.13G241400	11.6667	0.0104042	PF03031,PF00035	C-terminal domain phosphatase-like 1
Glyma.08G053300	11.6667	0.0207177		golgin candidate 2
Glyma.04G149900	11.6667	0.0226499	PF12695	alpha/beta-Hydrolases superfamily protein
Glyma.06G216800	11.6667	0.0270886	PF01636	Protein kinase superfamily protein
Glyma.20G181600	11.6667	0.0270886	PF00806,PF07990	pumilio 4
Glyma.13G273900	11.6364	0.0401872
Glyma.14G214800	11.6316	0.0200077	PF00011	HSP20-like chaperones superfamily protein
Glyma.17G065600	11.6	0.00312204	PF00370,PF02782	FGGY family of carbohydrate kinase
Glyma.11G031400	11.6	0.00395574	PF15413,PF01237	OSBP(oxysterol binding protein)-related protein 2A
Glyma.09G199800	11.5833	0.00134884	PF00847	AINTEGUMENTA-like 6
Glyma.04G067000	11.5714	0.00507022	PF13259
Glyma.19G188800	11.5	0.00587717	PF10312,PF09732
Glyma.04G254900	11.5	0.0344716	PF13589,PF01119,PF16413	MUTL-homologue 1
Glyma.04G148300	11.5	0.0344716	PF01636	Protein kinase superfamily protein
Glyma.05G026300	11.5	0.0344716	PF01073,PF02866	malate dehydrogenase
Glyma.11G071000	11.5	0.0372673		auxin-like 1 protein
Glyma.18G246900	11.5	0.0391164		Thioesterase/thiol ester dehydrase-isomerase superfamily protein
Glyma.15G201500	11.5	0.0391164
Glyma.13G025900	11.5	0.0391164	PF07227,PF16312	Protein of unknown function (DUF1423)
Glyma.04G087800	11.5	0.0437253	PF06219	Protein of unknown function (DUF1005)
Glyma.06G173500	11.4074	0.00899656	PF14288,PF02364	glucan synthase-like 8
Glyma.14G064400	11.3826	7.35e-05	PF05922,PF00082	Subtilase family protein
Glyma.16G038400	11.3333	0.00818279	PF02854,PF02847	MIF4G domain-containing protein / MA3 domain-containing protein
Glyma.04G017600	11.3333	0.0097433		thiazole biosynthetic enzyme, chloroplast (ARA6) (THI1) (THI4)
Glyma.12G028100	11.3333	0.018476	PF00397,PF01846	pre-mRNA-processing protein 40C
Glyma.04G163600	11.3333	0.026316
Glyma.03G000600	11.3333	0.0489972	PF00763,PF02882	Amino acid dehydrogenase family protein
Glyma.20G187200	11.3077	0.00290161	PF07714,PF00069	Protein kinase superfamily protein
Glyma.19G130200	11.3	0.0202648	PF07716,PF14144	TGACG motif-binding factor 6
Glyma.04G061800	11.25	0.00456793
Glyma.13G172200	11.25	0.0167113	PF05918	Apoptosis inhibitory protein 5 (API5)
Glyma.07G093800	11.2069	0.00794461	PF02485	Core-2/I-branching beta-1,6-N-acetylglucosaminyltransferase family protein
Glyma.05G012400	11.2	0.0413296	PF00226,PF14237	DNAJ heat shock N-terminal domain-containing protein
Glyma.19G168000	11.1667	0.0106618	PF01657	plasmodesmata-located protein 1
Glyma.13G009500	11.1471	0.00595658	PF00730	DNA glycosylase superfamily protein
Glyma.10G081700	11.0462	0.0232516	PF05920,PF07526	BEL1-like homeodomain 1
Glyma.02G045200	11	0.00284085	PF08159
Glyma.06G052000	11	0.00888877	PF02535	iron regulated transporter 3
Glyma.01G169100	11	0.0198629	PF05277	Protein of unknown function (DUF726)
Glyma.09G268900	11	0.0248519	PF03479	AT-hook motif nuclear-localized protein 1
Glyma.06G098900	11	0.0354221	PF14531	phosphoenolpyruvate carboxylase-related kinase 2
Glyma.06G041700	11	0.0377081	PF00658,PF00076	poly(A) binding protein 8
Glyma.14G201500	11	0.0377081	PF16940	translocon at the inner envelope membrane of chloroplasts 110
Glyma.16G033800	11	0.0377081	PF01794,PF08022,PF08030	ferric reduction oxidase 2
Glyma.10G169000	11	0.0401938	PF05253
Glyma.08G216900	11	0.0401938
Glyma.11G062100	11	0.0401938	PF05033,PF00856	nucleic acid binding;sequence-specific DNA binding transcription factors;zinc ion binding
Glyma.10G058600	11	0.0418944	PF01842	ACT-like superfamily protein
Glyma.07G088200	10.9667	0.000402472	PF01740,PF00916	sulfate transporter 3;5
Glyma.17G008400	10.9615	0.00372574	PF00240,PF00632	ubiquitin protein ligase 5
Glyma.14G050200	10.9412	0.00404999	PF13920	histone mono-ubiquitination 2
Glyma.15G173300	10.9091	0.014497	PF02045	nuclear factor Y, subunit A3
Glyma.16G121900	10.875	0.00645349	PF13441	NEP-interacting protein 2
Glyma.19G112600	10.875	0.0212315	PF07797	Protein of unknown function (DUF1639)
Glyma.18G281800	10.875	0.0282687	PF13837	Homeodomain-like superfamily protein
Glyma.09G227500	10.8667	0.00582124	PF01593	polyamine oxidase 1
Glyma.06G000400	10.85	0.000998323	PF02042	Plant regulator RWP-RK family protein
Glyma.06G192600	10.8333	0.00381973	PF03271	end binding protein 1B
Glyma.05G035100	10.8333	0.0043649	PF08711	BAH domain ;TFIIS helical bundle-like domain
Glyma.09G095700	10.8214	0.000180769	PF03789,PF03790,PF05920,PF03791	KNOTTED1-like homeobox gene 3
Glyma.17G038500	10.8	0.0130407	PF03810	ARM repeat superfamily protein
Glyma.08G119700	10.8	0.0165191	PF04564,PF00514	plant U-box 17
Glyma.19G175900	10.7778	0.0211168	PF00690,PF00702,PF00689,PF00122	endomembrane-type CA-ATPase 4
Glyma.17G071400	10.75	0.00815836	PF10377
Glyma.17G143300	10.75	0.0173531	PF13696,PF08783	DWNN domain, a CCHC-type zinc finger
Glyma.09G207200	10.75	0.0208989	PF12174	WWE protein-protein interaction domain protein family
Glyma.20G220100	10.75	0.0312864	PF00646,PF14299	phloem protein 2-B1
Glyma.07G184700	10.75	0.0361924	PF03807,PF00745,PF05201	Glutamyl-tRNA reductase family protein
Glyma.10G095200	10.7	0.00548904	PF05000,PF04983,PF04997,PF00623,PF04998	nuclear RNA polymerase A1
Glyma.12G191700	10.6966	0.00132729	PF03552	cellulose synthase-like B3
Glyma.09G222900	10.6667	0.00205444
Glyma.10G276900	10.6667	0.00365139	PF03439	kow domain-containing transcription factor 1
Glyma.05G064700	10.6667	0.0253246	PF01027	BAX inhibitor 1
Glyma.U026800	10.6667	0.032992	PF07724,PF06480,PF01434	FTSH protease 9
Glyma.09G017500	10.6667	0.0369611	PF12695	alpha/beta-Hydrolases superfamily protein
Glyma.19G089100	10.6667	0.0386842	PF00485,PF14681	uridine kinase/uracil phosphoribosyltransferase 1
Glyma.13G290400	10.6	0.00557677	PF14381,PF07714	Mitogen activated protein kinase kinase kinase-related
Glyma.03G019500	10.6	0.0326714	PF00462,PF00610,PF04784	glutaredoxin-related
Glyma.18G280300	10.5758	0.00584183	PF13855,PF02902,PF00931	Cysteine proteinases superfamily protein
Glyma.10G280700	10.5	0.0103011	PF00626,PF04810,PF04815,PF08033,PF04811	Sec23/Sec24 protein transport family protein
Glyma.08G061700	10.5	0.0428834	PF01363	phosphoinositide binding
Glyma.17G257300	10.5	0.0428834	PF12776
Glyma.12G231200	10.5	0.0428834	PF09507	DNA-directed DNA polymerases
Glyma.11G141400	10.5	0.0428834
Glyma.13G239900	10.5	0.048839	PF01728	S-adenosyl-L-methionine-dependent methyltransferases superfamily protein
Glyma.11G237000	10.4348	0.0182181	PF13561	NAD(P)-binding Rossmann-fold superfamily protein
Glyma.08G217500	10.4286	0.00602528	PF03470,PF03468,PF03469	XH/XS domain-containing protein
Glyma.08G329200	10.3611	0.000204989	PF08766	DEK domain-containing chromatin associated protein
Glyma.09G283600	10.3333	0.00375437	PF02375,PF02373	Transcription factor jumonji (jmj) family protein / zinc finger (C5HC2 type) family protein
Glyma.19G051500	10.3333	0.0125207	PF13920,PF07002	RING domain ligase1
Glyma.17G120500	10.3333	0.0276827	PF00226,PF14237	DNAJ heat shock N-terminal domain-containing protein
Glyma.17G109700	10.3333	0.0358896	PF00862,PF05116,PF00534	sucrose phosphate synthase 1F
Glyma.06G159500	10.3333	0.0369943	PF02493,PF01504	phosphatidylinositol-4-phosphate 5-kinase 1
Glyma.02G044300	10.3125	0.00289544	PF13441,PF13639	NEP-interacting protein 2
Glyma.01G038300	10.25	0.00572332	PF08295,PF02671,PF16879	SIN3-like 3
Glyma.13G112600	10.25	0.00735383	PF02309,PF02362,PF06507	Transcriptional factor B3 family protein / auxin-responsive factor AUX/IAA-related
Glyma.08G060200	10.25	0.00735383	PF02373,PF08879	Zinc finger, RING-type;Transcription factor jumonji/aspartyl beta-hydroxylase
Glyma.17G152900	10.25	0.0132512	PF00335	tobamovirus multiplication 2A
Glyma.09G135800	10.25	0.0401918	PF00106	NAD(P)-binding Rossmann-fold superfamily protein
Glyma.06G276400	10.2378	0.000319032	PF07847	Protein of unknown function (DUF1637)
Glyma.15G053600	10.2	0.00621239	PF01833,PF00612,PF12796,PF03859	Calmodulin-binding transcription activator protein with CG-1 and Ankyrin domains
Glyma.08G152500	10.2	0.00621239	PF00010	basic helix-loop-helix (bHLH) DNA-binding superfamily protein
Glyma.01G013600	10.2	0.0176378	PF00170,PF07777,PF16596	basic region/leucine zipper transcription factor 16
Glyma.13G293200	10.1818	0.00370643	PF00025	RAB GTPase homolog A1F
Glyma.08G076800	10.1148	0.000897817	PF00892	nodulin MtN21 /EamA-like transporter family protein
Glyma.04G064100	10.1	0.0050447	PF03789,PF03790,PF05920,PF03791	KNOTTED1-like homeobox gene 3
Glyma.10G165600	10.1	0.00557585
Glyma.15G128700	10.0833	0.000978162	PF00141	Peroxidase superfamily protein
Glyma.08G194500	10	0.0043202	PF07714	Protein kinase protein with adenine nucleotide alpha hydrolases-like domain
Glyma.11G069400	10	0.00749498	PF00646,PF01167	tubby like protein 2
Glyma.20G136300	10	0.0110057	PF05770	Inositol 1,3,4-trisphosphate 5/6-kinase family protein
Glyma.09G226400	10	0.0138035	PF12931	transducin family protein / WD-40 repeat family protein
Glyma.06G117400	10	0.0172767	PF08729	wound-responsive family protein
Glyma.19G027500	10	0.0225279	PF07839	Plant calmodulin-binding protein-related
Glyma.01G238300	10	0.0311365	PF00628,PF16135	Acyl-CoA N-acyltransferase with RING/FYVE/PHD-type zinc finger protein
Glyma.02G150400	10	0.0311365	PF13920	RING/U-box superfamily protein
Glyma.18G146700	10	0.0464854		kinesin like protein for actin based chloroplast movement 1
Glyma.18G128900	10	0.0476139		aminophospholipid ATPase 3
Glyma.15G192700	10	0.0476139		Outer arm dynein light chain 1 protein
Glyma.07G045600	10	0.0476139	PF01363,PF00118,PF01504	phosphatidylinositol-4-phosphate 5-kinase family protein
Glyma.12G028800	10	0.0476139	PF00076,PF00641	TBP-associated factor 15
Glyma.08G356200	9.96774	0.000501715
Glyma.03G172200	9.95455	0.00207418	PF01399	eukaryotic translation initiation factor 3A
Glyma.08G214900	9.93243	0.000460346	PF16987
Glyma.07G078000	9.875	0.0130183	PF00931	NB-ARC domain-containing disease resistance protein
Glyma.02G181800	9.83333	0.00323796	PF01554	MATE efflux family protein
Glyma.08G306600	9.82857	0.00170144
Glyma.02G132700	9.82524	0.000438577	PF08553	Vacuolar import/degradation, Vid27-related protein
Glyma.06G189600	9.81818	0.000962755	PF13499,PF07714	calcium-dependent protein kinase 1
Glyma.15G129500	9.8	0.019587	PF00933,PF01915	Glycosyl hydrolase family protein
Glyma.18G239200	9.8	0.0237289		GRIP-related ARF-binding domain-containing protein 1
Glyma.12G134500	9.8	0.030612	PF00085,PF13850,PF07970	PDI-like 5-4
Glyma.12G202600	9.75	0.00758091	PF05623	Protein of unknown function (DUF789)
Glyma.12G055000	9.75	0.0100201	PF08007	2-oxoglutarate (2OG) and Fe(II)-dependent oxygenase superfamily protein
Glyma.05G037400	9.75	0.01103	PF04695	peroxin 14
Glyma.12G236300	9.75	0.0119408	PF00076	RNA-binding (RRM/RBD/RNP motifs) family protein
Glyma.14G002900	9.75	0.022052	PF01467	phosphorylcholine cytidylyltransferase
Glyma.15G021000	9.75	0.0278884	PF13541,PF13481	ATP-dependent peptidases;nucleotide binding;serine-type endopeptidases;DNA helicases;ATP binding;damaged DNA binding;nucleoside-triphosphatases
Glyma.13G172300	9.75	0.0380138	PF00141	Peroxidase superfamily protein
Glyma.20G189900	9.72	0.000534604	PF09258	glycosyltransferase family protein 47
Glyma.19G028200	9.71429	0.0183791	PF13881	membrane-anchored ubiquitin-fold protein 2
Glyma.03G124700	9.7	0.011504	PF08711	Transcription elongation factor (TFIIS) family protein
Glyma.04G244100	9.66667	0.00209809	PF13947,PF00069	wall-associated kinase 2
Glyma.18G142500	9.66667	0.00899712	PF01326	Pyruvate phosphate dikinase, PEP/pyruvate binding domain
Glyma.15G140900	9.66667	0.012122	PF00171	aldehyde dehydrogenase 22A1
Glyma.18G066700	9.66667	0.0335303
Glyma.18G288600	9.66667	0.0360913	PF00614,PF00168,PF12357	phospholipase D beta 1
Glyma.04G233400	9.66667	0.0441153	PF00400	Transducin/WD40 repeat-like superfamily protein
Glyma.10G149700	9.66667	0.0441153	PF00436	mitochondrially targeted single-stranded DNA binding protein
Glyma.06G292200	9.64706	0.0312625	PF00069	Protein kinase superfamily protein
Glyma.11G125500	9.64286	0.00569001	PF00564,PF02042	Plant regulator RWP-RK family protein
Glyma.06G145200	9.61947	0.0172856	PF00854	Major facilitator superfamily protein
Glyma.17G236700	9.61111	0.010499	PF00887	acyl-CoA-binding domain 3
Glyma.03G202300	9.6	0.00166031	PF05920,PF07526	BEL1-like homeodomain 1
Glyma.06G296900	9.58447	0.00366955	PF04144	secretory carrier 3
Glyma.18G001900	9.57143	0.00488698
Glyma.02G229400	9.55263	0.00182024	PF07719,PF13414	tetratricopeptide repeat (TPR)-containing protein
Glyma.19G132300	9.55172	0.000315764	PF00072	response regulator 9
Glyma.05G066300	9.5	0.00177378
Glyma.13G325600	9.5	0.0112109	PF00035	dsRNA-binding protein 2
Glyma.18G044000	9.5	0.0161517	PF16457,PF01363,PF08381,PF00415	Regulator of chromosome condensation (RCC1) family with FYVE zinc finger domain
Glyma.05G051100	9.5	0.0195204	PF00400	FIZZY-related 2
Glyma.08G332000	9.42857	0.00278563	PF17125,PF01189	S-adenosyl-L-methionine-dependent methyltransferases superfamily protein
Glyma.02G014000	9.38462	0.00319882	PF13098,PF07749	thioredoxin family protein
Glyma.05G089200	9.375	0.039026	PF13906,PF13520	cationic amino acid transporter 2
Glyma.10G209600	9.33333	0.0155376	PF02375,PF02373	Zinc finger (C2H2 type) family protein / transcription factor jumonji (jmj) family protein
Glyma.18G300200	9.33333	0.0155982	PF04652,PF14288,PF02364	glucan synthase-like 12
Glyma.15G043500	9.33333	0.0159
Glyma.08G026700	9.33333	0.0165583	PF14604	SH3 domain-containing protein
Glyma.08G292600	9.33333	0.0165583	PF02181	formin 8
Glyma.20G178100	9.33333	0.0227298	PF09728
Glyma.18G211200	9.33333	0.0371013
Glyma.13G340700	9.33333	0.0371013	PF01103	outer envelope protein of 80 kDa
Glyma.19G008100	9.33333	0.0431866	PF00657	GDSL-like Lipase/Acylhydrolase superfamily protein
Glyma.11G109900	9.33333	0.0431866	PF12537,PF12430	GPCR-type G protein 2
Glyma.18G049000	9.2973	0.000105174	PF01230	FRAGILE HISTIDINE TRIAD
Glyma.10G142500	9.28263	8.36e-05		neurofilament protein-related
Glyma.06G156500	9.25	0.025205		Chaperone DnaJ-domain superfamily protein
Glyma.02G042000	9.23179	0.00765508	PF00132,PF06426	serine acetyltransferase 3;2
Glyma.01G040900	9.23077	0.00998641	PF00270,PF00271,PF04408,PF07717	RNA helicase family protein
Glyma.03G102000	9.21429	0.00276087	PF12076	Fatty acid hydroxylase superfamily
Glyma.14G166000	9.2	0.0185658	PF14531	MAPK/ERK kinase kinase 1
Glyma.18G068600	9.2	0.0194624
Glyma.07G160700	9.17722	0.00409857	PF00067	cytochrome P450, family 71, subfamily B, polypeptide 34
Glyma.04G207600	9.16667	0.00729375	PF00564,PF00571	CBS / octicosapeptide/Phox/Bemp1 (PB1) domains-containing protein
Glyma.08G330600	9.01639	0.00750184	PF03552	cellulose synthase like E1
Glyma.12G223300	9	0.00105677
Glyma.19G012100	9	0.00390918	PF14416,PF13839	TRICHOME BIREFRINGENCE-LIKE 22
Glyma.15G096800	9	0.00783261	PF00069	Protein kinase superfamily protein
Glyma.14G007700	9	0.00836201	PF02518,PF00183	HEAT SHOCK PROTEIN 89.1
Glyma.05G060600	9	0.00852118	PF08458,PF05703	Plant protein of unknown function (DUF828) with plant pleckstrin homology-like region
Glyma.15G005500	9	0.0115006	PF16987
Glyma.15G177700	9	0.0119733	PF14802	FRIGIDA interacting protein 1
Glyma.06G013800	9	0.0163713	PF00454,PF00613	Phosphatidylinositol 3- and 4-kinase family protein
Glyma.04G164200	9	0.0209983
Glyma.06G127600	9	0.0214991
Glyma.17G112500	9	0.0420192	PF00400	WUS-interacting protein 2
Glyma.01G036500	8.94444	0.0313869	PF00226	ARG1-like 1
Glyma.16G019700	8.92308	0.0019036	PF00612,PF13178	IQ-domain 17
Glyma.09G211400	8.90323	0.000424956	PF00249,PF14379	Homeodomain-like superfamily protein
Glyma.17G153200	8.90099	0.033088	PF14572,PF13793	Phosphoribosyltransferase family protein
Glyma.17G191000	8.88889	0.0203605	PF03127,PF00790	ENTH/VHS/GAT family protein
Glyma.07G037100	8.875	0.0071909	PF00249	TRF-like 6
Glyma.17G234900	8.85714	0.00326485	PF15811
Glyma.03G200800	8.84211	0.000578927	PF03641	Putative lysine decarboxylase family protein
Glyma.02G090200	8.81818	0.0171111	PF12874
Glyma.13G058900	8.8125	0.00415023	PF07839	Plant calmodulin-binding protein-related
Glyma.03G172700	8.76596	0.00526845	PF00719	pyrophosphorylase 4
Glyma.02G230100	8.75	0.00851881	PF07767
Glyma.18G276300	8.75	0.00938254	PF00498	SMAD/FHA domain-containing protein
Glyma.02G251700	8.75	0.0155389	PF08662,PF00400,PF04158	nucleotide binding;protein binding
Glyma.12G170100	8.75	0.0216937	PF05794	T-complex protein 11
Glyma.13G155700	8.74713	0.000521754	PF00149	Calcineurin-like metallo-phosphoesterase superfamily protein
Glyma.19G184100	8.73585	0.00240125	PF00403	Heavy metal transport/detoxification superfamily protein
Glyma.03G121000	8.66667	0.000992122	PF14641,PF14632,PF14639,PF14635,PF14878,PF14633	global transcription factor group B1
Glyma.03G246200	8.66667	0.00144819	PF13178,PF00612	IQ-domain 19
Glyma.05G127500	8.66667	0.0202163	PF07885	Ca2+ activated outward rectifying K+ channel 6
Glyma.08G245600	8.66667	0.042813	PF03639	glycosyl hydrolase family 81 protein
Glyma.17G204700	8.66667	0.045051	PF10513	Enhancer of polycomb-like transcription factor protein
Glyma.06G119200	8.66667	0.0484122	PF13947,PF00069	wall-associated kinase 2
Glyma.06G082000	8.64516	0.0102857	PF01925	Sulfite exporter TauE/SafE family protein
Glyma.11G255200	8.64286	0.00183919
Glyma.06G202100	8.6	0.0279159	PF04004	leo1-like family protein
Glyma.19G020500	8.59239	0.00108202	PF07847	Protein of unknown function (DUF1637)
Glyma.15G193000	8.57143	0.0147526	PF04003,PF00400	periodic tryptophan protein 2
Glyma.20G124700	8.56667	0.00145296	PF00085,PF04777	quiescin-sulfhydryl oxidase 1
Glyma.08G329100	8.55556	0.000363899	PF08766	DEK domain-containing chromatin associated protein
Glyma.15G121300	8.55556	0.0258543	PF13242,PF13344	2-phosphoglycolate phosphatase 2
Glyma.09G002100	8.53846	0.0156272	PF01926,PF02212,PF00169,PF01031	dynamin-like 3
Glyma.19G167500	8.5	0.00699995	PF00249,PF14379	phosphate starvation response 1
Glyma.18G213100	8.5	0.0197768	PF00122,PF12710,PF16209,PF16212	aminophospholipid ATPase 1
Glyma.10G198700	8.5	0.02895		Myosin heavy chain-related protein
Glyma.10G078500	8.5	0.0332774	PF03641	Putative lysine decarboxylase family protein
Glyma.17G023600	8.44444	0.013049	PF13892,PF09110,PF04851,PF00271,PF09111	chromatin remodeling factor17
Glyma.10G245700	8.4	0.0127951	PF03914,PF07540	binding
Glyma.15G097000	8.4	0.0179626	PF13892,PF09110,PF04851,PF00271,PF09111	chromatin remodeling factor17
Glyma.18G003000	8.4	0.0188978	PF08263,PF00560,PF13855,PF07714	Leucine-rich repeat protein kinase family protein
Glyma.09G109000	8.4	0.0328779
Glyma.09G017700	8.4	0.0328779	PF00400	Transducin/WD40 repeat-like superfamily protein
Glyma.14G039900	8.375	0.0131335	PF00069	cyclin-dependent kinase C;1
Plant-U3.8	8.375	0.0422204		snoRNA
Glyma.13G036600	8.34615	0.000884302		RNI-like superfamily protein
Glyma.19G003300	8.33803	0.0013315	PF13516,PF12937	Galactose mutarotase-like superfamily protein
Glyma.05G207800	8.33333	0.00477642	PF01263	bromo-adjacent homology (BAH) domain-containing protein
Glyma.17G001700	8.33333	0.00711304	PF01426,PF07500	mitotic checkpoint family protein
Glyma.17G151100	8.33333	0.0175598	PF05557	lon protease 2
Glyma.17G175600	8.33333	0.0197104	PF13541,PF02190,PF00004
Glyma.13G293300	8.33333	0.0200426
Glyma.07G201100	8.33333	0.0392041
Glyma.15G039500	8.33333	0.0481753		Noc2p family
Glyma.15G108300	8.33333	0.0481753	PF03715	Ankyrin repeat family protein
Glyma.02G292300	8.33333	0.0481753	PF11904
Glyma.03G033300	8.33333	0.0481753	PF13890
Glyma.12G165900	8.33333	0.0481753	PF12874	Smg-4/UPF3 family protein
Glyma.11G153900	8.33333	0.0481753	PF03467	AUTOPHAGY 6
Glyma.03G136000	8.25	5.44e-05	PF04111	ATP-binding cassette A1
Glyma.17G242100	8.25	0.0099263	PF13304,PF00005,PF12698	cold regulated gene 27
Glyma.13G197400	8.25	0.0341014		Tetratricopeptide repeat (TPR)-like superfamily protein
Glyma.17G068400	8.25	0.0371262	PF01535,PF13041	XB3 ortholog 2 in Arabidopsis thaliana
Glyma.14G087600	8.23077	0.0131447	PF13857,PF12796	acyl-CoA-binding domain 3
Glyma.06G065100	8.22727	0.000528359	PF00887
Glyma.16G042900	8.2	0.00786485		Arabidopsis NAC domain containing protein 87
Glyma.05G117000	8.2	0.0117851	PF02365	Calmodulin-binding transcription activator protein with CG-1 and Ankyrin domains
Glyma.09G259200	8.18182	0.045601	PF01833,PF00612,PF03859	Protein of unknown function (DUF3741)
Glyma.08G326000	8.16667	0.00680781	PF12552,PF14309	CCCH-type zinc fingerfamily protein with RNA-binding domain
Glyma.20G056500	8.16667	0.0184124	PF00076,PF12872
Glyma.17G061200	8.13333	0.0113633	PF14648	villin 4
Glyma.01G159200	8.125	0.0288651	PF02209,PF00626	RWP-RK domain-containing protein
Glyma.04G175300	8.07692	0.00259807	PF02042	calcium-dependent protein kinase 1
Glyma.04G048100	8.07692	0.00517885	PF06293,PF13499	Cellulose-synthase-like C12
Glyma.16G201200	8.07407	0.00155121	PF13632	Protein kinase superfamily protein
Glyma.18G014100	8	0.00673592	PF00069	beta-1,4-N-acetylglucosaminyltransferase family protein
Glyma.01G019900	8	0.0146012	PF04724
Glyma.10G032800	8	0.020524		Signal recognition particle, SRP9/SRP14 subunit
Glyma.10G172800	8	0.022041	PF05486	Tetratricopeptide repeat (TPR)-like superfamily protein
Glyma.15G205600	8	0.0242011	PF06552	homolog of yeast FIP1 [V]
Glyma.06G173400	8	0.0278283	PF05182	glucan synthase-like 8
Glyma.03G151400	8	0.036116		Tudor/PWWP/MBT domain-containing protein
Glyma.04G146000	7.91667	0.0322831	PF04818,PF00855	Transcription factor TFIIE, alpha subunit
Glyma.02G098300	7.90909	0.00468909	PF02002	phytochrome and flowering time regulatory protein (PFT1)
Glyma.08G201000	7.9	0.00420839	PF11265	hydroxyproline-rich glycoprotein family protein
Glyma.12G112600	7.88889	0.0067867	PF03985
Glyma.09G212100	7.88889	0.0493717		ENHANCED DISEASE RESISTANCE 2
Glyma.10G261400	7.83871	0.00353505	PF01852,PF07059	D-3-phosphoglycerate dehydrogenase
Glyma.20G190500	7.83333	0.00680304	PF07991,PF01842,PF00389	UDP-Glycosyltransferase superfamily protein
Glyma.20G122300	7.83333	0.0243098	PF00534	2-oxoglutarate (2OG) and Fe(II)-dependent oxygenase superfamily protein
Glyma.16G026700	7.8	0.00893141		Protein of unknown function (DUF3133)
Glyma.10G226700	7.8	0.0295379	PF11331	nucleotide binding;nucleic acid binding
Glyma.09G161700	7.8	0.0317843	PF00076
Glyma.20G228000	7.78571	0.014862	PF07000	with no lysine (K) kinase 1
Glyma.08G269000	7.77778	0.00876425	PF00069	XH/XS domain-containing protein
Glyma.13G256100	7.75	0.0161718	PF03470,PF03468,PF03469	dynamin-related protein 3A
Glyma.17G218800	7.75	0.044184	PF01926,PF02212,PF01031	Cyclophilin-like peptidyl-prolyl cis-trans isomerase family protein
Glyma.11G090300	7.75	0.044184	PF00160	zinc knuckle (CCHC-type) family protein
Glyma.08G150900	7.72727	0.0190119	PF10197	NB-ARC domain-containing disease resistance protein
Glyma.01G048500	7.71429	0.00678886	PF00931	galactosyltransferase1
Glyma.09G257900	7.7	0.0127151	PF01762,PF00337	transcription regulatory protein SNF2, putative
Glyma.06G127500	7.66667	0.0175523	PF04851,PF08880,PF00271	splicing factor-related
Glyma.19G215100	7.66667	0.0175523	PF12108,PF16837,PF13297,PF11931	DNAJ heat shock family protein
Glyma.03G093600	7.66667	0.0210838	PF01556,PF00226	Seven transmembrane MLO family protein
Glyma.16G089300	7.66667	0.0217815	PF03094	GTP cyclohydrolase I
Glyma.09G116200	7.66667	0.0250838	PF01227	F-box family protein with a domain of unknown function (DUF295)
Glyma.11G175900	7.64286	0.000437083	PF00646,PF03478	cytochrome P450, family 86, subfamily A, polypeptide 1
Glyma.09G046300	7.63636	0.017865	PF00067	CW-type Zinc Finger
Glyma.11G101900	7.63551	0.000450865	PF07496	ATPase E1-E2 type family protein / haloacid dehalogenase-like hydrolase family protein
Glyma.01G056800	7.60976	0.000808855	PF00690,PF00702,PF00122,PF00689	WRKY DNA-binding protein 57
Glyma.06G184600	7.6	0.0314853	PF03106	BAH domain ;TFIIS helical bundle-like domain
Glyma.07G203600	7.6	0.0326708	PF01426,PF08711	Apoptosis inhibitory protein 5 (API5)
Glyma.19G136000	7.6	0.034989	PF05918	INO80 ortholog
Glyma.02G290200	7.6	0.0440321	PF04851,PF00271,PF13892	ARM repeat superfamily protein
Glyma.10G203000	7.57895	0.00209519	PF12397,PF08146	pleiotropic drug resistance 11
Glyma.17G216700	7.55556	0.00573644	PF00005,PF08370,PF01061	Mitochondrial glycoprotein family protein
Glyma.06G066800	7.55556	0.0106551	PF02330
Glyma.18G209000	7.55556	0.0422962
Glyma.10G101400	7.53125	0.00179012		RING-H2 finger C1A
Glyma.08G264800	7.53125	0.00543673	PF14369,PF13639	CTP synthase family protein
Glyma.05G001900	7.52632	0.000796111	PF07722,PF06418	methionine aminopeptidase 2B
Glyma.12G211700	7.5	0.000813681	PF00557	Protein of unknown function (DUF1637)
Glyma.17G026500	7.5	0.015737	PF07847	protein arginine methyltransferase 4A
Glyma.10G153800	7.5	0.0208722	PF05185	DNA binding
Glyma.03G068700	7.5	0.0384269	PF00249,PF06584	Metal-dependent protein hydrolase
Glyma.14G206200	7.5	0.0417189	PF03690	Leucine-rich repeat protein kinase family protein
Glyma.18G149800	7.5	0.0459382	PF08263,PF13855,PF00069	E3 Ubiquitin ligase family protein
Glyma.09G270400	7.45455	0.00878904	PF13920,PF12483	cysteine-rich RLK (RECEPTOR-like protein kinase) 25
Glyma.08G054300	7.42857	0.00362243		translocon at the outer membrane of chloroplasts 64-III
Glyma.07G248800	7.42857	0.016252	PF07719,PF13414,PF01425
Glyma.07G101400	7.4	0.0123678		RAB GTPase homolog A6B
Glyma.06G075900	7.33333	0.00831421	PF00025
Glyma.11G085900	7.33333	0.0115276		Transducin/WD40 repeat-like superfamily protein
Glyma.15G112900	7.33333	0.0198441	PF08596	Alternative oxidase family protein
Glyma.10G160400	7.33333	0.0310972	PF01786	with no lysine (K) kinase 1
Glyma.10G259500	7.33333	0.0322063	PF00069	Protein of unknown function (DUF620)
Glyma.08G290900	7.33333	0.0322063	PF04788
Glyma.10G066700	7.32381	0.000355883		Aldolase superfamily protein
Glyma.10G016400	7.30435	0.036664	PF00274	Ribosomal protein L19e family protein
Glyma.05G211600	7.28689	0.00637388	PF01280	Heavy metal transport/detoxification superfamily protein
Glyma.05G066800	7.28571	0.029507	PF00403	calcineurin B-like protein 9
Glyma.07G003600	7.25	0.0197286	PF13833,PF13499	exocyst complex component 84B
Glyma.12G168100	7.25	0.0210683	PF08700,PF16528
Glyma.06G041000	7.25	0.0490478		RING/U-box superfamily protein
Glyma.14G128300	7.25	0.0490478	PF13639	LisH dimerisation motif;WD40/YVTN repeat-like-containing domain
Glyma.20G177200	7.24074	0.000329243	PF08513,PF00400	cytosolic invertase 2
TFIIB1	7.2	0.0100331	PF12899	CYCLIN FAMILY PROTEIN-RELATED;transcription factor TFIIB
Glyma.12G230000	7.2	0.0152317	PF00382	tubby like protein 7
Glyma.01G108000	7.2	0.0367775	PF00646,PF01167	Arabidopsis Inositol phosphorylceramide synthase 1
Glyma.19G145300	7.18182	0.00317146	PF14360	bZIP transcription factor family protein
Glyma.05G032700	7.18182	0.0143206	PF00170,PF14144	RING/U-box superfamily protein
Glyma.17G129600	7.14286	0.00455849	PF14570	SNF1-related protein kinase regulatory subunit gamma 1
Glyma.08G132700	7.13861	0.000776614	PF00571	GTP cyclohydrolase II
Glyma.16G166200	7.13636	0.0492294	PF00925,PF00926
Glyma.09G025000	7.125	0.0131581		KRR1 family protein
Glyma.06G037300	7.125	0.0222432	PF05178,PF12936	uroporphyrinogen-III synthase family protein
Glyma.01G215500	7.11765	0.00136649	PF02602	hydroxymethylglutaryl-CoA synthase / HMG-CoA synthase / 3-hydroxy-3-methylglutaryl coenzyme A synthase
Glyma.08G170400	7.11111	0.00444184	PF01154,PF08540	SBP (S-ribonuclease binding protein) family protein
Glyma.17G160500	7.03448	0.000728205	PF13920	Homeodomain-like/winged-helix DNA-binding family protein
Glyma.09G199500	7	0.00305527	PF00249,PF00538
Glyma.15G119000	7	0.00378559	PF07093	GT-2-like 1
Glyma.04G123800	7	0.0187432	PF13837	alternative oxidase 1A
Glyma.02G137200	7	0.0258376	PF01786	Eukaryotic translation initiation factor eIF2A family protein
Glyma.08G361900	7	0.0277307	PF08662	RNA helicase, ATP-dependent, SK12/DOB1 protein
Glyma.13G194700	7	0.0403328	PF00271,PF00270,PF08148,PF13234	disease resistance protein (TIR-NBS-LRR class), putative
Glyma.07G121900	6.94444	0.00953224	PF13676,PF00931	multidrug resistance-associated protein 9
Glyma.17G048900	6.9375	0.027288	PF00005,PF00664	Protein kinase superfamily protein
Glyma.02G112500	6.92857	0.0438478	PF07714	Transducin/WD40 repeat-like superfamily protein
Glyma.03G134200	6.88889	0.0230374		autoinhibited Ca2+-ATPase 11
Glyma.10G256200	6.875	0.0390652	PF00690,PF12515,PF12710,PF00689,PF00122	CYCLIN D1;1
Glyma.04G096900	6.85714	0.0439539	PF02984,PF00134	ubiquitin-protein ligase 1
Glyma.16G121700	6.84524	0.00855693	PF00627,PF14377,PF06012,PF00632,PF06025	2-oxoglutarate (2OG) and Fe(II)-dependent oxygenase superfamily protein
Glyma.01G154300	6.83333	0.0109899	PF03171	zinc knuckle (CCHC-type) family protein
Glyma.02G311000	6.80488	0.000414422	PF10197	Plant regulator RWP-RK family protein
Glyma.20G135900	6.8	0.0117263	PF00564,PF02042	F-box family protein
Glyma.09G254700	6.78947	0.000943964	PF00646	ketopantoate hydroxymethyltransferase 1
Glyma.08G063100	6.78571	0.00671498	PF02548	ZIP metal ion transporter family
Glyma.07G202100	6.78261	0.00274989		Guanylate-binding family protein
Glyma.16G003700	6.77778	0.00437377	PF02841,PF02263	Transducin/WD40 repeat-like superfamily protein
Glyma.12G013600	6.76471	0.0143872	PF00400,PF08145	DNA topoisomerase I alpha
Glyma.15G255200	6.75	0.0139015	PF14370,PF01028,PF02919
Glyma.08G095000	6.75	0.0311632		ENTH/ANTH/VHS superfamily protein
Glyma.09G255200	6.71429	0.0109333	PF07651	NAD(P)-binding Rossmann-fold superfamily protein
Glyma.02G106700	6.7027	0.0147641	PF02826	sphingoid base hydroxylase 2
Glyma.20G238800	6.69231	0.00278909	PF04116	RING/U-box protein
Glyma.03G042800	6.66667	0.000455777	PF13639,PF00628	Uncharacterised protein family (UPF0497)
Glyma.18G103800	6.66667	0.0108368	PF04535	actin-related protein C1B
Glyma.02G071300	6.66667	0.0126597	PF00400	transcription regulator NOT2/NOT3/NOT5 family protein
Glyma.08G309400	6.66667	0.0414212	PF04153,PF04065	MEI2-like protein 5
Glyma.11G038800	6.64286	0.0116838	PF00076,PF04059	Protein kinase superfamily protein
Glyma.04G067800	6.63934	0.0206459	PF00069	Mitochondrial substrate carrier family protein
Glyma.03G075300	6.63636	0.0303233	PF00153	Disease resistance protein (TIR-NBS-LRR class) family
Glyma.17G187300	6.63265	0.000994766	PF13676,PF00931	Protein of unknown function (DUF1637)
Glyma.12G128900	6.62044	0.00667277	PF07847	Protein of unknown function (DUF1637)
Glyma.17G051400	6.6	0.00390613	PF07847	nuclear factor Y, subunit A8
Glyma.16G142800	6.6	0.0070832	PF02045	BEL1-like homeodomain 2
Glyma.18G141000	6.6	0.0236129	PF05920,PF07526	Kelch repeat-containing F-box family protein
[truncated: 766 more rows]
