# Supplementary material for: Single-cell resolution transcriptome atlases of soybean root organs reveal new regulatory programs controlling the nodulation process
Source: Research Square preprint supplement (doi:10.21203/rs.3.rs-2833917/v1), 2023-05-18
Supplement: Supplementary file 5 [file 2827acd45a49f1237477a1ef.xlsx]

## Sheet: GO_DGE_FvsG_UP
Table.S4. Gene ontology (GO) term enrichment of the differentially expressed genes between clusters F, G, and H (see Table.S2). P=Biological Process; C=Cellular component; F=Molecular function
GO.ID	Term	p-value	q-value	Aspect
GO:0015291	secondary active transmembrane transporter activity	0.0046	1	F

## Sheet: GO_DGE_FvsG_DOWN
GO.ID	Term	p-value	q-value	Aspect
GO:0006076	(1->3)-beta-D-glucan catabolic process	7.7e-06	0.04086	P
GO:0006074	(1->3)-beta-D-glucan metabolic process	0.00011	0.2919	P
GO:0051275	beta-glucan catabolic process	0.00019	0.3361	P
GO:0006073	cellular glucan metabolic process	0.00037	0.4352	P
GO:0044042	glucan metabolic process	0.00041	0.4352	P
GO:0009251	glucan catabolic process	0.00053	0.4644	P
GO:0044247	cellular polysaccharide catabolic process	0.00069	0.4644	P
GO:0044264	cellular polysaccharide metabolic process	0.0007	0.4644	P
GO:0044275	cellular carbohydrate catabolic process	0.0012	0.7076	P
GO:0005975	carbohydrate metabolic process	0.00204	0.8739	P
GO:0071555	cell wall organization	0.00213	0.8739	P
GO:0051273	beta-glucan metabolic process	0.00226	0.8739	P
GO:0044262	cellular carbohydrate metabolic process	0.00233	0.8739	P
GO:0045229	external encapsulating structure organization	0.00247	0.8739	P
GO:0005976	polysaccharide metabolic process	0.00333	1	P
GO:0071554	cell wall organization or biogenesis	0.00641	1	P
GO:0000272	polysaccharide catabolic process	0.00854	1	P
GO:0009986	cell surface	2.8e-05	0.02503	C
GO:0005576	extracellular region	0.00037	0.1654	C
GO:0048046	apoplast	0.00642	1	C
GO:0042973	glucan endo-1,3-beta-D-glucosidase activity	1.5e-05	0.01294	F
GO:0052736	beta-glucanase activity	1.5e-05	0.01294	F
GO:0052861	glucan endo-1,3-beta-glucanase activity, C-3 substituted reducing group	1.5e-05	0.01294	F
GO:0004553	hydrolase activity, hydrolyzing O-glycosyl compounds	3.3e-05	0.02134	F
GO:0016798	hydrolase activity, acting on glycosyl bonds	4.7e-05	0.02432	F
GO:0008422	beta-glucosidase activity	0.00037	0.1595	F
GO:0015926	glucosidase activity	0.00062	0.2291	F

## Sheet: GO_DGE_FGvsH_UP
GO.ID	Term	p-value	q-value	Aspect
GO:0006396	RNA processing	8.6e-20	4.564e-16	P
GO:0016192	vesicle-mediated transport	8.6e-18	2.282e-14	P
GO:0044260	cellular macromolecule metabolic process	3.6e-17	6.368e-14	P
GO:0009987	cellular process	8.3e-17	1.101e-13	P
GO:0016568	chromatin modification	2.2e-16	2.335e-13	P
GO:0016070	RNA metabolic process	2.7e-15	2.388e-12	P
GO:0046483	heterocycle metabolic process	4.8e-15	3.317e-12	P
GO:0051649	establishment of localization in cell	5e-15	3.317e-12	P
GO:0006139	nucleobase-containing compound metabolic process	9.3e-15	5.484e-12	P
GO:0046907	intracellular transport	1.9e-14	1.008e-11	P
GO:0044237	cellular metabolic process	3.6e-14	1.737e-11	P
GO:0006725	cellular aromatic compound metabolic process	1.8e-13	7.96e-11	P
GO:0090304	nucleic acid metabolic process	4.3e-13	1.755e-10	P
GO:0016569	covalent chromatin modification	5.5e-13	2.085e-10	P
GO:0051641	cellular localization	6.9e-13	2.441e-10	P
GO:1901360	organic cyclic compound metabolic process	1.2e-12	3.98e-10	P
GO:0006807	nitrogen compound metabolic process	1.7e-12	5.307e-10	P
GO:0043170	macromolecule metabolic process	2e-12	5.307e-10	P
GO:0034641	cellular nitrogen compound metabolic process	2e-12	5.307e-10	P
GO:0006325	chromatin organization	2e-12	5.307e-10	P
GO:0018193	peptidyl-amino acid modification	6e-12	1.516e-09	P
GO:0048856	anatomical structure development	1.8e-11	4.342e-09	P
GO:0070647	protein modification by small protein conjugation or removal	3.2e-11	7.384e-09	P
GO:0016570	histone modification	4e-11	8.845e-09	P
GO:0010629	negative regulation of gene expression	5.9e-11	1.252e-08	P
GO:0010467	gene expression	6.9e-11	1.408e-08	P
GO:0033043	regulation of organelle organization	9.3e-11	1.828e-08	P
GO:0006354	DNA-templated transcription, elongation	9.8e-11	1.83e-08	P
GO:0043412	macromolecule modification	1e-10	1.83e-08	P
GO:0006886	intracellular protein transport	1.1e-10	1.946e-08	P
GO:0051128	regulation of cellular component organization	1.4e-10	2.397e-08	P
GO:0001666	response to hypoxia	3.5e-10	5.805e-08	P
GO:0006996	organelle organization	4.2e-10	6.754e-08	P
GO:0003032	detection of oxygen	5e-10	7.172e-08	P
GO:0070483	detection of hypoxia	5e-10	7.172e-08	P
GO:0006464	cellular protein modification process	5e-10	7.172e-08	P
GO:0036211	protein modification process	5e-10	7.172e-08	P
GO:0044767	single-organism developmental process	5.4e-10	7.542e-08	P
GO:0034613	cellular protein localization	5.6e-10	7.62e-08	P
GO:0032502	developmental process	6.3e-10	8.359e-08	P
GO:1902582	single-organism intracellular transport	7.1e-10	9.19e-08	P
GO:0040029	regulation of gene expression, epigenetic	8.4e-10	1.061e-07	P
GO:0044707	single-multicellular organism process	8.6e-10	1.061e-07	P
GO:0090630	activation of GTPase activity	9.5e-10	1.146e-07	P
GO:0070727	cellular macromolecule localization	1e-09	1.179e-07	P
GO:0015031	protein transport	2.4e-09	2.769e-07	P
GO:0006397	mRNA processing	2.8e-09	3.096e-07	P
GO:0036293	response to decreased oxygen levels	2.8e-09	3.096e-07	P
GO:0043933	macromolecular complex subunit organization	2.9e-09	3.141e-07	P
GO:0045184	establishment of protein localization	3.1e-09	3.29e-07	P
GO:0070482	response to oxygen levels	4.1e-09	4.266e-07	P
GO:0018158	protein oxidation	4.4e-09	4.406e-07	P
GO:0018171	peptidyl-cysteine oxidation	4.4e-09	4.406e-07	P
GO:0007275	multicellular organismal development	4.7e-09	4.619e-07	P
GO:0008104	protein localization	5.2e-09	5.018e-07	P
GO:0044238	primary metabolic process	5.3e-09	5.023e-07	P
GO:0048518	positive regulation of biological process	6.2e-09	5.773e-07	P
GO:0071840	cellular component organization or biogenesis	6.5e-09	5.948e-07	P
GO:0060627	regulation of vesicle-mediated transport	7.2e-09	6.476e-07	P
GO:0048608	reproductive structure development	8.1e-09	7.047e-07	P
GO:0061458	reproductive system development	8.1e-09	7.047e-07	P
GO:0003006	developmental process involved in reproduction	8.4e-09	7.19e-07	P
GO:0051345	positive regulation of hydrolase activity	9.2e-09	7.75e-07	P
GO:0032501	multicellular organismal process	1.4e-08	1.143e-06	P
GO:0031338	regulation of vesicle fusion	1.4e-08	1.143e-06	P
GO:0033036	macromolecule localization	1.5e-08	1.206e-06	P
GO:0008380	RNA splicing	1.9e-08	1.483e-06	P
GO:0043087	regulation of GTPase activity	1.9e-08	1.483e-06	P
GO:0043632	modification-dependent macromolecule catabolic process	2e-08	1.538e-06	P
GO:0006368	transcription elongation from RNA polymerase II promoter	2.2e-08	1.668e-06	P
GO:0005622	intracellular	1e-30	1.49e-28	C
GO:0044464	cell part	1e-30	1.49e-28	C
GO:0005634	nucleus	1e-30	1.49e-28	C
GO:0005623	cell	1e-30	1.49e-28	C
GO:0005488	binding	1.2e-25	3.104e-22	F
GO:0005515	protein binding	8.1e-20	1.048e-16	F
GO:0003724	RNA helicase activity	5.7e-15	4.915e-12	F

## Sheet: GO_DGE_FGvsH_DOWN
GO.ID	Term	p-value	q-value	Aspect
GO:0009877	nodulation	6.5e-10	3.45e-06	P
GO:1901564	organonitrogen compound metabolic process	1.4e-09	3.715e-06	P
GO:1902600	hydrogen ion transmembrane transport	3.9e-08	6.899e-05	P
GO:1901566	organonitrogen compound biosynthetic process	1e-06	0.001327	P
GO:0044281	small molecule metabolic process	1.3e-06	0.00138	P
GO:0044403	symbiosis, encompassing mutualism through parasitism	2.3e-06	0.001592	P
GO:0006818	hydrogen transport	2.7e-06	0.001592	P
GO:0015992	proton transport	2.7e-06	0.001592	P
GO:0044419	interspecies interaction between organisms	2.9e-06	0.001592	P
GO:0034059	response to anoxia	3e-06	0.001592	P
GO:0005740	mitochondrial envelope	7.5e-17	4.47e-14	C
GO:0044429	mitochondrial part	1e-16	4.47e-14	C
GO:0005737	cytoplasm	4.5e-16	1.341e-13	C
GO:0044444	cytoplasmic part	1.4e-14	3.129e-12	C
GO:0005743	mitochondrial inner membrane	5.1e-14	9.119e-12	C
GO:0031966	mitochondrial membrane	3.1e-13	4.619e-11	C
GO:0005739	mitochondrion	4.7e-13	6.003e-11	C
GO:0019866	organelle inner membrane	1.9e-12	2.123e-10	C
GO:0044424	intracellular part	7.8e-12	7.748e-10	C
GO:0070469	respiratory chain	1e-11	8.94e-10	C
GO:0015078	hydrogen ion transmembrane transporter activity	1.3e-08	3.363e-05	F
GO:0004129	cytochrome-c oxidase activity	1.1e-07	7.114e-05	F
GO:0016675	oxidoreductase activity, acting on a heme group of donors	1.1e-07	7.114e-05	F
GO:0016676	oxidoreductase activity, acting on a heme group of donors, oxygen as acceptor	1.1e-07	7.114e-05	F
GO:0015002	heme-copper terminal oxidase activity	1.5e-07	7.761e-05	F
GO:0015077	monovalent inorganic cation transmembrane transporter activity	2.4e-06	0.001035	F
GO:0003735	structural constituent of ribosome	5.5e-06	0.002005	F
GO:0016491	oxidoreductase activity	6.2e-06	0.002005	F
GO:0005198	structural molecule activity	1e-05	0.002874	F
GO:0019201	nucleotide kinase activity	3.4e-05	0.008796	F

## Sheet: GO_DGE_FvsH_UP
GO.ID	Term	p-value	q-value	Aspect
GO:0018158	protein oxidation	3.4e-11	8.889e-08	P
GO:0018171	peptidyl-cysteine oxidation	3.4e-11	8.889e-08	P
GO:0003032	detection of oxygen	6.7e-11	8.889e-08	P
GO:0070483	detection of hypoxia	6.7e-11	8.889e-08	P
GO:0009061	anaerobic respiration	2.2e-10	2.335e-07	P
GO:0009593	detection of chemical stimulus	7.4e-10	6.545e-07	P
GO:0018198	peptidyl-cysteine modification	1e-09	7.581e-07	P
GO:0001666	response to hypoxia	5.4e-09	3.582e-06	P
GO:0036293	response to decreased oxygen levels	1.7e-08	1.002e-05	P
GO:0070482	response to oxygen levels	2.2e-08	1.168e-05	P
GO:0005634	nucleus	2.5e-14	2.235e-11	C
GO:0005622	intracellular	6.3e-14	2.816e-11	C
GO:0044464	cell part	9.8e-13	2.92e-10	C
GO:0005623	cell	8.2e-12	1.833e-09	C
GO:0044428	nuclear part	2.9e-11	5.185e-09	C
GO:0044424	intracellular part	1.1e-09	1.639e-07	C
GO:0043231	intracellular membrane-bounded organelle	5.4e-09	6.897e-07	C
GO:0043227	membrane-bounded organelle	6.5e-09	7.264e-07	C
GO:0043226	organelle	1.4e-08	1.341e-06	C
GO:0043229	intracellular organelle	1.5e-08	1.341e-06	C
GO:0031981	nuclear lumen	3.4e-08	2.763e-06	C
GO:0000166	nucleotide binding	1.5e-07	0.0001293	F
GO:1901265	nucleoside phosphate binding	1.5e-07	0.0001293	F
GO:0032553	ribonucleotide binding	2.6e-07	0.0001293	F
GO:0005524	ATP binding	3.4e-07	0.0001293	F
GO:0032559	adenyl ribonucleotide binding	4.8e-07	0.0001293	F
GO:0035639	purine ribonucleoside triphosphate binding	4.8e-07	0.0001293	F
GO:0030554	adenyl nucleotide binding	5.2e-07	0.0001293	F
GO:0005488	binding	5.4e-07	0.0001293	F
GO:0001883	purine nucleoside binding	6.2e-07	0.0001293	F
GO:0032550	purine ribonucleoside binding	6.2e-07	0.0001293	F

## Sheet: GO_DGE_FvsH_DOWN
GO.ID	Term	p-value	q-value	Aspect
GO:0009877	nodulation	5.6e-17	2.972e-13	P
GO:0044403	symbiosis, encompassing mutualism through parasitism	1.2e-12	2.83e-09	P
GO:0044419	interspecies interaction between organisms	1.6e-12	2.83e-09	P
GO:0009399	nitrogen fixation	1.5e-11	1.327e-08	P
GO:0015669	gas transport	1.5e-11	1.327e-08	P
GO:0015671	oxygen transport	1.5e-11	1.327e-08	P
GO:0071941	nitrogen cycle metabolic process	1e-07	7.581e-05	P
GO:0005739	mitochondrion	2.2e-09	1.967e-06	C
GO:0044429	mitochondrial part	8.8e-09	3.874e-06	C
GO:0005740	mitochondrial envelope	1.3e-08	3.874e-06	C
GO:0005746	mitochondrial respiratory chain	1.2e-07	2.682e-05	C
GO:0044455	mitochondrial membrane part	2.5e-07	4.47e-05	C
GO:0070469	respiratory chain	3.7e-07	5.513e-05	C
GO:0005344	oxygen transporter activity	6.8e-12	1.759e-08	F
GO:0019825	oxygen binding	6.6e-10	8.537e-07	F

## Sheet: GO_DGE_GvsH_UP
GO.ID	Term	p-value	q-value	Aspect
GO:0009987	cellular process	4.1e-17	2.176e-13	P
GO:0006396	RNA processing	4.6e-15	1.221e-11	P
GO:0044260	cellular macromolecule metabolic process	1.4e-13	2.477e-10	P
GO:0016568	chromatin modification	3.6e-13	4.776e-10	P
GO:0044237	cellular metabolic process	2.9e-12	3.078e-09	P
GO:0016070	RNA metabolic process	7.3e-11	6.457e-08	P
GO:0046483	heterocycle metabolic process	1e-10	7.581e-08	P
GO:0006325	chromatin organization	2.4e-10	1.592e-07	P
GO:0006139	nucleobase-containing compound metabolic process	3.3e-10	1.946e-07	P
GO:0006354	DNA-templated transcription, elongation	5.3e-10	2.813e-07	P
GO:0006725	cellular aromatic compound metabolic process	6.7e-10	3.232e-07	P
GO:0010629	negative regulation of gene expression	9.2e-10	4.069e-07	P
GO:0006397	mRNA processing	1.2e-09	4.899e-07	P
GO:0040029	regulation of gene expression, epigenetic	2.7e-09	1.023e-06	P
GO:0005634	nucleus	3.4e-25	3.04e-22	C
GO:0044428	nuclear part	1e-21	4.47e-19	C
GO:0005622	intracellular	1e-20	2.98e-18	C
GO:0043231	intracellular membrane-bounded organelle	1.7e-18	3.799e-16	C
GO:0043227	membrane-bounded organelle	2.5e-18	4.023e-16	C
GO:0044424	intracellular part	2.7e-18	4.023e-16	C
GO:0031981	nuclear lumen	7.7e-18	9.834e-16	C
GO:0044464	cell part	2.7e-17	3.017e-15	C
GO:0043226	organelle	4.4e-17	4.371e-15	C
GO:0005623	cell	1.5e-16	1.3e-14	C
GO:0005488	binding	1.6e-17	4.139e-14	F
GO:0005515	protein binding	2.5e-14	3.234e-11	F
GO:0035639	purine ribonucleoside triphosphate binding	2.5e-12	1.638e-09	F
GO:0005524	ATP binding	3.4e-12	1.638e-09	F
GO:0000166	nucleotide binding	3.8e-12	1.638e-09	F
GO:1901265	nucleoside phosphate binding	3.8e-12	1.638e-09	F
GO:0036094	small molecule binding	6.8e-12	2.513e-09	F
GO:0032553	ribonucleotide binding	2.6e-11	8.358e-09	F
GO:0032549	ribonucleoside binding	3.3e-11	8.358e-09	F
GO:0001882	nucleoside binding	3.4e-11	8.358e-09	F

## Sheet: GO_DGE_GvsH_DOWN
GO.ID	Term	p-value	q-value	Aspect
GO:0009877	nodulation	2.4e-09	1.274e-05	P
GO:1902600	hydrogen ion transmembrane transport	4.3e-07	0.001141	P
GO:1901564	organonitrogen compound metabolic process	2.2e-06	0.003052	P
GO:0010035	response to inorganic substance	2.3e-06	0.003052	P
GO:0009399	nitrogen fixation	5.8e-06	0.004397	P
GO:0015669	gas transport	5.8e-06	0.004397	P
GO:0015671	oxygen transport	5.8e-06	0.004397	P
GO:0005737	cytoplasm	4.5e-17	2.369e-14	C
GO:0044429	mitochondrial part	5.3e-17	2.369e-14	C
GO:0005740	mitochondrial envelope	2.2e-15	4.917e-13	C
GO:0044444	cytoplasmic part	2.6e-15	4.917e-13	C
GO:0005739	mitochondrion	2.8e-15	4.917e-13	C
GO:0044424	intracellular part	3.3e-15	4.917e-13	C
GO:0005622	intracellular	2.4e-14	3.065e-12	C
GO:0031966	mitochondrial membrane	4.3e-11	4.805e-09	C
GO:0005743	mitochondrial inner membrane	8.2e-11	8.145e-09	C
GO:0070469	respiratory chain	9.9e-10	8.851e-08	C
GO:0004129	cytochrome-c oxidase activity	7e-09	6.036e-06	F
GO:0016675	oxidoreductase activity, acting on a heme group of donors	7e-09	6.036e-06	F
GO:0016676	oxidoreductase activity, acting on a heme group of donors, oxygen as acceptor	7e-09	6.036e-06	F
GO:0015002	heme-copper terminal oxidase activity	9.6e-09	6.209e-06	F
GO:0015078	hydrogen ion transmembrane transporter activity	1.7e-07	8.796e-05	F
GO:0019825	oxygen binding	1.3e-06	0.0005605	F
GO:0005344	oxygen transporter activity	3.8e-06	0.001404	F
GO:0015077	monovalent inorganic cation transmembrane transporter activity	5.1e-06	0.001649	F
GO:0016491	oxidoreductase activity	8.8e-06	0.00253	F
GO:0005471	ATP:ADP antiporter activity	2.1e-05	0.005433	F
