# Supplementary material for: Single-cell resolution transcriptome atlases of soybean root organs reveal new regulatory programs controlling the nodulation process
Source: Research Square preprint supplement (doi:10.21203/rs.3.rs-2833917/v1), 2023-05-18
Supplement: Supplementary file 6 [file 314743a8cd70c4dbcbca8a02.xlsx]

## Sheet: Table.S6
Table.S6. Gene markers used to annotated the Medicago nodule cell clusters.
from Ye et al., 2022
Gene ID	Cell type
MtN13	Nodule Apex/Parenchyma
MtPLT4%3B%20MtBBM	Nodule Apex/Parenchyma
MtPLT5	Nodule Apex/Parenchyma
MtrunA17Chr2g0289861	Nodule Apex/Parenchyma
MtLEC4	Uninfected cells
MtPSK4	Uninfected cells
MtbHLH1	Uninfected cells
MtENOD8.2	Uninfected cells
MtGASA8	Uninfected cells
MtENOD20%3BMtENODL28%3BMtPCY72	Infected cells
MtN20	Infected cells
MtENOD10	Infected cells
MtEFD	Infected cells
MtENOD12	Infected cells
MtMMPL1%3BMtN9	Infected cells
MtDNF1	Infected cells
MtDNF2	Infected cells
MtNIN	Infected cells
MtN1	Infected cells
MtDELLA1	Infected cells
MtENOD11%20	Infected cells
MtN6	Infected cells
MtERN1	Infected cells
MtN2	Infected cells
MtDME	Nitrogen Fixation
MtNCR247	Nitrogen Fixation
MtNodGRP1B	Nitrogen Fixation
MtCOPT1	Nitrogen Fixation
MtNLP2	Nitrogen Fixation
MtLb1	Nitrogen Fixation
MtLb9	Nitrogen Fixation
MtLb2	Nitrogen Fixation
MtLb4	Nitrogen Fixation
MtLb5	Nitrogen Fixation
Medicago orthologous genes to Glycine max genes specifcially expressed in the nodule parenchyman and vacular bundle (Fig.S12)
Glycine max ID	Cell type	Medicago truncatula Ortholog ID
Glyma.04G227200	Nodule parenchyma	MtPrx07
Glyma.14G218700	Nodule parenchyma	MtrunA17Chr1g0156521
Glyma.16G106800	Nodule parenchyma	MtrunA17Chr5g0408941
Glyma.02G003700	Vascular bundle	MtPHO1.1
Glyma.02G003700	Vascular bundle	MtPHO1.2
Glyma.18G062100	Vascular bundle	MtrunA17Chr3g0105161
Glyma.11G078300	Vascular bundle	MtHK1
