# Supplementary material for: Single-cell resolution transcriptome atlases of soybean root organs reveal new regulatory programs controlling the nodulation process
Source: Research Square preprint supplement (doi:10.21203/rs.3.rs-2833917/v1), 2023-05-18
Supplement: Supplementary file 15 [file 854c28277412cfde57e46291.xlsx]

## Sheet: Table.S2
Table.S2. Functionally validated cell-type gene markers in Arabidopsis thaliana and Medicago truncatula,and their Glycine max orthologs.
Arabidopsis gene	Arabidopsis gene name	Cell type	Medicago ortholog	Soybean ortholog	Reference
AT5G47100	CBL9	Epidermal cells	MtrunA17Chr4g0068011	GLYMA_17G030700	Janes et al., 2018
AT1G11190	BFN1	Root cap cell death marker	MtrunA17Chr2g0281321	GLYMA_15G068600	Fendrych et al., 2014
AT1G79580	SMB	Root cap cell death marker	----	GLYMA_15G266500	Fendrych et al., 2014
AT5G55520		Niche cells	MtrunA17Chr3g0101021	GLYMA_08G325200	Jean-Baptiste et al., 2019, Denyer et al., 2019
AT4G23800		Niche cells	MtrunA17Chr8g0387931	GLYMA-05G215500	Denyer et al., 2019; Schulse et al., 2019
AT4G23800		Niche cells	MtrunA17Chr8g0387931	GLYMA-08G021700	Denyer et al., 2019; Schulse et al., 2019
AT5G57620	MYB36	Endodermal cells	MtrunA17Chr4g0072751	GLYMA-13G094400	Kamiya et al., 2015
AT2G27370		Endodermal cells	MtrunA17Chr2g0321671	GLYMA-12G186500	Ryu et al., 2015
AT2G38110	GPAT6	Endodermal cells (suberized)	MtrunA17Chr5g0437681	GLYMA-02G261600	Feng et al., 2022
AT4G20390	CASPL1B2	Endodermal cells (suberized)	MtrunA17Chr8g0381001	GLYMA-08G129300	Champeyroux et al., 2019
AT2G28810	DOF2.2	Cambium cells	MtrunA17Chr4g0031411	GLYMA-12G063800	Shi et al., 2021
AT2G40900	UMAMIT11	Stele/vasculature cells	MtrunA17Chr7g0255561	GLYMA-19G126400	Muller et al., 2015
AT4G36160		Xylem cells	MtrunA17Chr5g0405211	GLYMA-01G167900	Jean-Baptiste et al., 2019
AT5G03170	FLA11	Xylem cells	MtrunA17Chr7g0263981	GLYMA-03G180000	Ma et al., 2021
AT1G20850		Xylem cells	MtrunA17Chr3g0144281	GLYMA-04G014800	Denyer et al., 2019
AT2G40320	TBL33	Xylem cells	MtrunA17Chr5g0437601	GLYMA-02G262100	Yuan et al., 2016
AT2G37090	IRX9	Xylem cells	MtrunA17Chr2g0282871	GLYMA-13G234700	Peña et al., 2007
Medicago Gene ID	Medicago gene name	Medicago root cell-type-specificity based on the litterature		Soybean gene ID	Reference
MtrunA17Chr2g0328971	MtPLT1	Quiescent center and nodule primordium, Niche cells		GLYMA_11G131900	Franssen et al., 2015
MtrunA17Chr4g0032631	MtPLT2			GLYMA_12G056300
MtrunA17Chr7g0249621	MtPLT4			GLYMA_09G248200
MtrunA17Chr7g0249621	MtPLT4			GLYMA_18G244600
MtrunA17Chr1g0166651	MtPHO1.1	Central cylinder and pericycle cells		GLYMA_02G003700	Nguyen et al., 2020
MtrunA17Chr1g0166651	MtPHO1.1			GLYMA_10G004800
MtrunA17Chr1g0187381	MtPHO1.2			GLYMA_20G206900
