# Supplementary material for: Single-cell resolution transcriptome atlases of soybean root organs reveal new regulatory programs controlling the nodulation process
Source: Research Square preprint supplement (doi:10.21203/rs.3.rs-2833917/v1), 2023-05-18
Supplement: Supplementary file 17 [file 8896bcd6bdaa88e81ecd515a.xlsx]

## Sheet: sNuc root
Table.S1. Normalized average expression of the genes and and percentage of cellsexpressing each gene in each root and nodule cluster (green: cluster-specific genes, red: non expressed genes, blue: ubiquitiously expressed genes)
Gene ID	Gene Name	Normalized average expression																%age of cells in the cluster expressing the gene
		Cluster#1	Cluster#2	Cluster#3	Cluster#4	Cluster#5	Cluster#6	Cluster#7	Cluster#8	Cluster#9	Cluster#10	Cluster#11	Cluster#12	Cluster#13	Cluster#14	Cluster#15	Cluster#16	Cluster#1	Cluster#2	Cluster#3	Cluster#4	Cluster#5	Cluster#6	Cluster#7	Cluster#8	Cluster#9	Cluster#10	Cluster#11	Cluster#12	Cluster#13	Cluster#14	Cluster#15	Cluster#16
GLYMA_13G201400	GLYMA_13G201400	0.00323889	0.00727572	0.686135	0	0.00374767	0.00146041	0.00394283	0.00488354	0	0	0	0.00956467	0	0	0	0	0.000757576	0.00203459	0.202614	0	0.000611995	0.0021322	0.00135318	0.000694927	0	0	0	0.00141576	0	0	0	0
GLYMA_15G155100	GLYMA_15G155100	0	0	0.709682	0	0	0	0	0	0	0	0	0.00378445	0.00511724	0	0	0	0	0	0.202614	0	0	0	0	0	0	0	0	0.000471921	0.00100503	0	0	0
GLYMA_07G243800	GLYMA_07G243800	0.00829765	0.000993257	0.928726	0	0.00180211	0	0	0	0	0	0	0.00204827	0.0027207	0	0	0	0.000757576	0.000508647	0.202614	0	0.000611995	0	0	0	0	0	0	0.000471921	0.00100503	0	0	0
GLYMA_13G067500	GLYMA_13G067500	0	0.00328927	1.05038	0.0400708	0.0054303	0	0.00758509	0	0.00279145	0	0	0.00509226	0.00114991	0	0	0	0	0.00101729	0.20915	0.00662252	0.000611995	0	0.00135318	0	0.000543774	0	0	0.000943841	0.00100503	0	0	0
GLYMA_10G251000	GLYMA_10G251000	0.00918274	0	0	0	0	0	0.0377481	0.00147324	0.00690945	0.0126807	0	0.0100509	0.0109005	1.09914	0	0.00749564	0.000757576	0	0	0	0	0	0.00405954	0.000694927	0.000543774	0.00131752	0	0.000943841	0.00100503	0.237805	0	0.003861
GLYMA_10G218700	GLYMA_10G218700	0	0.00113487	0	0	0.0125759	0	0	0.00657936	0.00460435	0	0	0.00491379	0	1.11676	0	0	0	0.000508647	0	0	0.00122399	0	0	0.00138985	0.000543774	0	0	0.000943841	0	0.213415	0	0
GLYMA_11G182000	GLYMA_11G182000	0.0252977	0.00570872	1.20047	0	0	0.0159476	0	0.00666799	0.00977107	0.00228143	0.0244147	0	0	0	0	0	0.00378788	0.000508647	0.228758	0	0	0.0021322	0	0.00138985	0.00108755	0.00131752	0.00813008	0	0	0	0	0
GLYMA_14G128400	GLYMA_14G128400	0	0.00758006	1.21452	0	0.00672861	0	0.00231194	0	0.0110484	0	0	0	0	0	0	0	0	0.00203459	0.261438	0	0.00183599	0	0.00135318	0	0.00163132	0	0	0	0	0	0	0
GLYMA_05G051200	GLYMA_05G051200	0	0	1.28464	0	0.00266665	0	0	0.00258241	0	0	0	0.00395907	0	0	0	0	0	0	0.228758	0	0.000611995	0	0	0.000694927	0	0	0	0.000471921	0	0	0	0
GLYMA_09G028500	GLYMA_09G028500	0.00487187	0	1.30037	0	0.00287322	0.00924229	0.00826622	0.00578624	0.00285146	0	0	0.012183	0.00293181	0	0	0	0.000757576	0	0.281046	0	0.000611995	0.0021322	0.00135318	0.000694927	0.000543774	0	0	0.000943841	0.00100503	0	0	0
GLYMA_06G231300	GLYMA_06G231300	0.0114602	0	0	0	0.00223682	0.0146682	0.00576803	0.00505769	0	0	0	0.00627419	0	1.34365	0	0.00568045	0.00151515	0	0	0	0.000611995	0.00426439	0.00135318	0.000694927	0	0	0	0.000943841	0	0.231707	0	0.003861
GLYMA_03G240300	GLYMA_03G240300	0.0164227	0.00499605	0	0.0237366	0.0158748	0.0183901	0	0.0159105	0.00201921	0	0	0.0597855	0.00883489	1.34859	0	0.0117213	0.00151515	0.00101729	0	0.00331126	0.00305998	0.00426439	0	0.00277971	0.000543774	0	0	0.00991034	0.00201005	0.22561	0	0.003861
GLYMA_13G348400	GLYMA_13G348400	0.00150791	0.0196672	0	0	0.0459762	1.36791	0	0.0105625	0.0078069	0	0	0.0354215	0.0187654	0.0255235	0	0.0621961	0.000757576	0.00101729	0	0	0.00734394	0.202559	0	0.00138985	0.00163132	0	0	0.00330345	0.00301508	0.00609756	0	0.00772201
GLYMA_20G006600	GLYMA_20G006600	0.00563253	0.0208426	0	0	0.00509108	1.38829	0	0.0031819	0	0	0	0	0	0.00514345	0	0	0.000757576	0.00305188	0	0	0.00122399	0.200426	0	0.000694927	0	0	0	0	0	0.00609756	0	0
GLYMA_20G133600	GLYMA_20G133600	0	0.00789436	1.40718	0.0161841	0.00159125	0	0	0	0	0	0	0	0	0	0	0	0	0.00305188	0.215686	0.00331126	0.000611995	0	0	0	0	0	0	0	0	0	0	0
GLYMA_06G289900	GLYMA_06G289900	0.00827616	0.0147616	0	0	0.0407282	1.44997	0.029695	0.011098	0.00298122	0.00992858	0	0.0659308	0.025377	0.0276158	0	0	0.00227273	0.00254323	0	0	0.00489596	0.204691	0.0067659	0.00277971	0.000543774	0.00131752	0	0.00660689	0.00502513	0.00609756	0	0
GLYMA_13G228200	GLYMA_13G228200	0.00338506	0.00239815	0.0220548	0	0.014059	0	0	0	0	0.0122333	0	0.0082072	0.0225663	1.46045	0	0.0231059	0.000757576	0.000508647	0.00653595	0	0.00122399	0	0	0	0	0.00131752	0	0.00141576	0.00301508	0.237805	0	0.003861
GLYMA_18G203100	GLYMA_18G203100	0	0.0042636	0	0	0.0109586	0.0113505	0	0	0.00741546	0	0	0.0432346	0	1.48016	0	0	0	0.000508647	0	0	0.00183599	0.0021322	0	0	0.00108755	0	0	0.00566305	0	0.213415	0	0
GLYMA_06G137600	GLYMA_06G137600	0	0.00188527	0	0	0.0157084	1.48475	0	0	0	0	0	0.00799866	0	0	0	0	0	0.000508647	0	0	0.00183599	0.211087	0	0	0	0	0	0.000471921	0	0	0	0
GLYMA_02G035300	GLYMA_02G035300	0.0175693	0	1.51033	0.0576488	0.00146621	0	0	0.00745358	0	0.0122446	0	0	0.00342778	0	0	0	0.00227273	0	0.326797	0.00662252	0.000611995	0	0	0.00138985	0	0.00131752	0	0	0.00100503	0	0	0
GLYMA_18G241600	GLYMA_18G241600	0	0.00389768	0	0.0149089	0	0.00593927	0	0	0	0.0225855	0.0221528	0.0629808	0.00943021	1.51546	0	0	0	0.000508647	0	0.00331126	0	0.0021322	0	0	0	0.00395257	0.00813008	0.00755073	0.00201005	0.268293	0	0
GLYMA_09G200800	GLYMA_09G200800	0.00772956	0.0204986	0	0.0374153	0.0622481	1.54291	0.0268448	0.0056315	0.0119123	0	0	0.0412781	0.0233902	0	0	0	0.00151515	0.00406918	0	0.00331126	0.00917993	0.200426	0.00405954	0.000694927	0.00271887	0	0	0.00471921	0.00301508	0	0	0
GLYMA_17G205300	GLYMA_17G205300	0.00237187	0.0219494	1.54952	0.0581943	0.00393566	0	0.0312098	0	0	0	0	0.00392287	0	0	0	0	0.000757576	0.00559512	0.248366	0.00331126	0.000611995	0	0.00405954	0	0	0	0	0.000471921	0	0	0	0
GLYMA_19G082000	GLYMA_19G082000	0.014348	0.000881537	0	0	0.0266916	1.57947	0	0	0	0.00961696	0	0.00518962	0.00321197	0.00514345	0	0	0.000757576	0.000508647	0	0	0.00244798	0.206823	0	0	0	0.00131752	0	0.000943841	0.00100503	0.00609756	0	0
GLYMA_06G301700	GLYMA_06G301700	0	0	1.58794	0.0387282	0	0	0	0	0	0	0	0	0	0.0276158	0	0	0	0	0.30719	0.00331126	0	0	0	0	0	0	0	0	0	0.00609756	0	0
GLYMA_19G016800	GLYMA_19G016800	0	0.00536359	1.59534	0.0234342	0.00599228	0	0	0	0.00241248	0	0	0.0134098	0.0096303	0	0	0	0	0.000508647	0.267974	0.00331126	0.00122399	0	0	0	0.000543774	0	0	0.00188768	0.00201005	0	0	0
GLYMA_19G033600	GLYMA_19G033600	0.0113426	0.018324	0	0	0.00830928	0	0	0.0307174	0.00693975	0.00307473	0	0.0111706	0	1.64717	0	0.0483835	0.00151515	0.00457782	0	0	0.00244798	0	0	0.00486449	0.00108755	0.00131752	0	0.00188768	0	0.256098	0	0.003861
GLYMA_04G007800	GLYMA_04G007800	0.0632646	0.0152963	0.0181605	0	0.0145961	0.0189922	0.0194153	0.00917729	0.00892807	0.0184146	0	0.0319801	0.059431	0.0262148	0	1.68317	0.00909091	0.00305188	0.00653595	0	0.00244798	0.0021322	0.00405954	0.00138985	0.00163132	0.00395257	0	0.00377537	0.0110553	0.00609756	0	0.204633
GLYMA_17G110500	GLYMA_17G110500	0	0	0	0	0	0	0.00583267	0	0	0.0126068	0	0.0103043	0	1.68442	0	0	0	0	0	0	0	0	0.00135318	0	0	0.00263505	0	0.000943841	0	0.213415	0	0
GLYMA_17G011200	GLYMA_17G011200	0	0.00409869	1.69071	0	0.00279322	0	0	0	0	0	0	0	0	0	0	0	0	0.000508647	0.352941	0	0.000611995	0	0	0	0	0	0	0	0	0	0	0
GLYMA_11G132900	GLYMA_11G132900	0.00352525	0.00544475	1.70836	0	0.00451324	0	0.0114482	0	0	0	0	0	0	0	0	0	0.000757576	0.00203459	0.267974	0	0.000611995	0	0.00135318	0	0	0	0	0	0	0	0	0
GLYMA_07G132100	GLYMA_07G132100	0	0.0121745	0	0	0.0156045	1.72689	0	0	0.00528144	0	0.0669694	0.00317792	0.00148453	0	0	0	0	0.00152594	0	0	0.00305998	0.221748	0	0	0.00163132	0	0.00813008	0.000471921	0.00100503	0	0	0
GLYMA_05G199900	GLYMA_05G199900	0.0430728	0.0104311	0	0.0387282	0.00489161	0.0344719	0.00582765	0.0227652	0.0141419	0.0386399	0.040408	0.0283518	0.00757938	1.73468	0	0	0.0030303	0.00152594	0	0.00331126	0.00122399	0.00426439	0.00135318	0.00347464	0.00271887	0.00395257	0.00813008	0.00283152	0.00100503	0.231707	0	0
GLYMA_12G136100	GLYMA_12G136100	0.0206538	0.00133223	0	0	0.00211836	0	0	0	0	0	0	0.00423106	0	1.75061	0	0	0.00227273	0.000508647	0	0	0.000611995	0	0	0	0	0	0	0.000943841	0	0.231707	0	0
GLYMA_09G184100	GLYMA_09G184100	0.00914919	0.0337099	0	0.0262798	0	0	0.0129911	0.00482253	0.00476159	0	1.78687	0	0.00541793	0	0	0	0.0030303	0.00356053	0	0.00331126	0	0	0.00270636	0.000694927	0.000543774	0	0.203252	0	0.00100503	0	0	0
GLYMA_01G159700	GLYMA_01G159700	0.00877807	0.00865225	0.0569333	0.0149695	0.0480262	1.81083	0.0108168	0	0	0.00529551	0	0.0321236	0	0	0	0	0.00151515	0.00152594	0.00653595	0.00331126	0.00611995	0.217484	0.00135318	0	0	0.00131752	0	0.00377537	0	0	0	0
GLYMA_08G279600	GLYMA_08G279600	0.00725647	0.00508431	0	0	0.0381949	1.82703	0	0.00323222	0.00493271	0.0281222	0.0436632	0.0058194	0	0.0205738	0	0.0197393	0.000757576	0.00101729	0	0	0.00489596	0.226013	0	0.000694927	0.00163132	0.00131752	0.00813008	0.000943841	0	0.00609756	0	0.003861
GLYMA_06G022900	GLYMA_06G022900	0.0141712	0	1.83494	0	0.0129476	0	0	0	0	0	0	0.00590639	0	0	0	0	0.00151515	0	0.300654	0	0.00122399	0	0	0	0	0	0	0.000471921	0	0	0	0
GLYMA_07G159700	GLYMA_07G159700	0.00522466	0.00391267	0	0	0.0439496	1.85657	0.0108341	0	0	0	0	0.0195714	0	0	0	0	0.000757576	0.000508647	0	0	0.00611995	0.257996	0.00135318	0	0	0	0	0.00188768	0	0	0	0
GLYMA_09G136400	GLYMA_09G136400	0.00782504	0	0	0	0.00876615	1.86516	0.00893188	0.0113275	0	0.00563044	0	0.0115387	0	0	0	0	0.00151515	0	0	0	0.00122399	0.228145	0.00135318	0.00138985	0	0.00131752	0	0.000943841	0	0	0	0
GLYMA_04G045300	GLYMA_04G045300	0.00718857	0.00621881	1.8671	0	0.00180211	0.0119719	0.00645293	0	0	0	0	0.0185066	0.0110093	0	0	0	0.00151515	0.00101729	0.261438	0	0.000611995	0.0021322	0.00135318	0	0	0	0	0.00188768	0.00201005	0	0	0
GLYMA_14G094500	GLYMA_14G094500	0.00568324	0	0	0	0.0872003	1.87399	0	0	0.00500659	0.0118274	0	0.0101176	0.00883756	0.0599564	0.0450519	0.0120845	0.000757576	0	0	0	0.00917993	0.240938	0	0	0.00108755	0.00263505	0	0.00141576	0.00201005	0.00609756	0.011236	0.003861
GLYMA_03G257500	GLYMA_03G257500	0	0	0	0	0	0	0	0	0	0	0.0404281	0.0257015	0.00728807	1.88626	0	0	0	0	0	0	0	0	0	0	0	0	0.00813008	0.0023596	0.00100503	0.25	0	0
GLYMA_20G033500	GLYMA_20G033500	0	0	0	0	0	0	0	0	0.0042153	0.0357377	1.89959	0	0	0	0	0	0	0	0	0	0	0	0	0	0.000543774	0.00395257	0.243902	0	0	0	0	0
GLYMA_06G241600	GLYMA_06G241600	0	0	0.0256211	0.023321	0.00298389	0.035507	0	0.00924105	0	0.00894449	0.0528958	0	0	0	1.90112	0	0	0	0.00653595	0.00993377	0.000611995	0.0021322	0	0.000694927	0	0.00131752	0.00813008	0	0	0	0.202247	0
GLYMA_12G040000	GLYMA_12G040000	0.0374372	0.00690793	0.015214	0.014956	0.0371294	0.00374398	0	0.00722377	0.00216643	0	0	0.0292013	0.00296906	0	0.0731507	1.90543	0.00151515	0.00101729	0.00653595	0.00331126	0.00183599	0.0021322	0	0.000694927	0.000543774	0	0	0.00330345	0.00100503	0	0.011236	0.212355
GLYMA_02G074500	GLYMA_02G074500	0.00375223	0	0	0.0702623	0.0408002	1.9199	0	0.0158327	0.00168586	0	0	0.00315034	0.0323048	0	0.0745584	0	0.000757576	0	0	0.00662252	0.00673195	0.257996	0	0.00138985	0.000543774	0	0	0.000471921	0.00502513	0	0.011236	0
GLYMA_06G077600	GLYMA_06G077600	0	0	1.92393	0.0229266	0.032233	0	0	0	0	0	0	0.0260101	0.0164195	0	0	0	0	0	0.418301	0.00662252	0.00367197	0	0	0	0	0	0	0.00424729	0.00201005	0	0	0
GLYMA_09G048400	GLYMA_09G048400	0	0.00250664	1.92594	0	0	0	0	0	0	0	0	0.00293483	0	0	0	0	0	0.00101729	0.411765	0	0	0	0	0	0	0	0	0.000471921	0	0	0	0
GLYMA_01G222200	GLYMA_01G222200	0.00246046	0.000860509	0.0259055	0.010613	0	0	0	0.00170034	0	0	0	0.0252232	0.0103156	1.92632	0	0.0166136	0.000757576	0.000508647	0.00653595	0.00331126	0	0	0	0.000694927	0	0	0	0.00330345	0.00201005	0.237805	0	0.003861
GLYMA_08G062500	GLYMA_08G062500	0	0.00417095	0	0.0358361	0.051074	1.9354	0.00818445	0.00900165	0.00599855	0.0136465	0.0527585	0.00999103	0.0139514	0	0.0561798	0.0739656	0	0.000508647	0	0.00331126	0.00673195	0.245203	0.00270636	0.000694927	0.00163132	0.00263505	0.00813008	0.000943841	0.00201005	0	0.011236	0.003861
GLYMA_18G291700	GLYMA_18G291700	0.0521858	0	0.066786	0.0335487	0	0.00718637	0.00362394	0.00923981	0.00275608	0.00991364	0	0.00999723	0.0249925	0.00848651	0	1.95368	0.00454545	0	0.0196078	0.00331126	0	0.0021322	0.00135318	0.00138985	0.000543774	0.00131752	0	0.000943841	0.0040201	0.00609756	0	0.208494
GLYMA_13G270000	GLYMA_13G270000	0.0247094	0	0	0	0.00416514	0	0.0104654	0.0239479	0.00379996	0	0	0.00903698	0.0221879	0	0	1.95381	0.00227273	0	0	0	0.00122399	0	0.00135318	0.00277971	0.000543774	0	0	0.00141576	0.0040201	0	0	0.262548
GLYMA_12G155800	GLYMA_12G155800	0.0220505	0.018698	1.97025	0	0.0477321	0.0107346	0	0.00185512	0.00338168	0.00586087	0	0.0201282	0.00935213	0.053434	0	0.0343987	0.0030303	0.00457782	0.346405	0	0.00979192	0.00426439	0	0.000694927	0.000543774	0.00131752	0	0.00377537	0.00201005	0.0304878	0	0.00772201
GLYMA_02G240500	GLYMA_02G240500	0.0150611	0.000740496	0	0	0	0	0.0107653	0	0	0	0	0.00745356	0	0	1.99692	0	0.000757576	0.000508647	0	0	0	0	0.00270636	0	0	0	0	0.000943841	0	0	0.202247	0
GLYMA_18G147700	GLYMA_18G147700	0.00971269	0.00637465	0	0	0.000644409	0.02673	0.0048449	0.030652	0.00979807	0	0	0.0485234	0.000928773	2.00411	0	0.00592815	0.00151515	0.00203459	0	0	0.000611995	0.00639659	0.00135318	0.00694927	0.00271887	0	0	0.00802265	0.00100503	0.304878	0	0.003861
GLYMA_07G019800	GLYMA_07G019800	0.0012025	0.00150222	2.01229	0.0074427	0.0492934	0.00797168	0.00625025	0.0205328	0	0.0065095	0	0.00829429	0.00148453	0	0	0	0.000757576	0.00101729	0.300654	0.00331126	0.0110159	0.00426439	0.00135318	0.00555942	0	0.00131752	0	0.00141576	0.00100503	0	0	0
GLYMA_02G192700	GLYMA_02G192700	0.00210906	0.00262054	2.03994	0.100381	0.0167601	0	0.00560787	0	0	0	0	0.0045655	0	0	0	0	0.000757576	0.000508647	0.366013	0.00993377	0.00428397	0	0.00135318	0	0	0	0	0.000471921	0	0	0	0
GLYMA_10G024800	GLYMA_10G024800	0	0.00283685	2.05568	0.00993477	0.0119483	0	0.00726735	0	0	0	0	0.00152183	0	0	0	0	0	0.000508647	0.300654	0.00331126	0.00122399	0	0.00135318	0	0	0	0	0.000471921	0	0	0	0
GLYMA_18G127400	GLYMA_18G127400	0.00387705	0.0099329	0.0850123	0	0.00873665	0.00718153	0	0.0267947	0	0	0	0.0183257	0.0541891	0	0	2.06564	0.000757576	0.00203459	0.0130719	0	0.00305998	0.0021322	0	0.00555942	0	0	0	0.00188768	0.0110553	0	0	0.204633
GLYMA_05G242900	GLYMA_05G242900	0.0130754	0.00562983	2.06648	0.0120673	0.00668117	0	0	0	0	0.00822938	0	0.00531198	0	0	0	0	0.00151515	0.00101729	0.300654	0.00331126	0.000611995	0	0	0	0	0.00131752	0	0.000943841	0	0	0	0
GLYMA_19G158600	GLYMA_19G158600	0.00705378	0	0	0	0	0	0.00417133	0	0.0112856	0	2.09403	0	0	0	0	0	0.000757576	0	0	0	0	0	0.00135318	0	0.00108755	0	0.203252	0	0	0	0	0
GLYMA_06G116400	GLYMA_06G116400	0.0297094	0	0.0640665	0.0372051	0.0256882	0	0	0	0	0.0162574	0	0.0241934	0.0252132	0	0.0355793	2.10246	0.00227273	0	0.0130719	0.00331126	0.00122399	0	0	0	0	0.00263505	0	0.0023596	0.00301508	0	0.011236	0.208494
GLYMA_04G214400	GLYMA_04G214400	0	0.00721694	0.0105487	0.026114	0	0.00269625	0.00230485	0.00414073	0.0075107	0.0187657	0.0418429	0.0536304	0.00379972	2.10887	0	0	0	0.00101729	0.00653595	0.00331126	0	0.0021322	0.00135318	0.00208478	0.00108755	0.00527009	0.00813008	0.00896649	0.00100503	0.25	0	0
GLYMA_05G188200	GLYMA_05G188200	0.00574356	0.00155979	2.11648	0.0367572	0.0275304	0	0.00480362	0	0	0.0290021	0	0.0282655	0	0	0	0	0.000757576	0.000508647	0.411765	0.00662252	0.00550796	0	0.00135318	0	0	0.00263505	0	0.00330345	0	0	0	0
GLYMA_12G214700	GLYMA_12G214700	0.00217632	0	0	0	0.0372983	0.0541549	0.0255606	0.00153915	0.00753409	0.00307473	0	0.0160967	0	2.11702	0	0	0.000757576	0	0	0	0.00673195	0.00852878	0.0067659	0.000694927	0.00163132	0.00131752	0	0.0023596	0	0.292683	0	0
GLYMA_01G021200	GLYMA_01G021200	0	0	0	0	0.0285323	2.15029	0.00317275	0	0	0.010697	0	0.00232703	0.0138063	0	0	0.0669151	0	0	0	0	0.00305998	0.253731	0.00135318	0	0	0.00263505	0	0.000471921	0.00301508	0	0	0.003861
GLYMA_13G253200	GLYMA_13G253200	0.00633508	0.0125383	0	0	0.0441774	2.15856	0	0	0.00168586	0.00903651	0	0.00862744	0.00584317	0.00514345	0.0667615	0.0073445	0.00151515	0.00101729	0	0	0.00367197	0.226013	0	0	0.000543774	0.00131752	0	0.000471921	0.00100503	0.00609756	0.011236	0.003861
GLYMA_14G088400	GLYMA_14G088400	0.00551365	0.0326842	2.16072	0.097255	0.0126048	0.00439809	0	0.0290452	0	0	0	0	0	0	0	0	0.000757576	0.00508647	0.359477	0.00662252	0.00183599	0.0021322	0	0.00416956	0	0	0	0	0	0	0	0
GLYMA_19G207300	GLYMA_19G207300	0.03054	0	0.010948	0	0.00322782	0.0683337	0.0340885	0	0	0.025538	0	0.0331013	0.0311399	0	0.103314	2.1659	0.00454545	0	0.00653595	0	0.000611995	0.00852878	0.00541272	0	0	0.00263505	0	0.00188768	0.00502513	0	0.0224719	0.204633
GLYMA_03G146400	GLYMA_03G146400	0.000941205	0.0055646	2.22655	0.0120541	0.0117201	0	0	0.00351328	0	0	0	0	0	0	0	0	0.000757576	0.00101729	0.379085	0.00331126	0.00183599	0	0	0.000694927	0	0	0	0	0	0	0	0
GLYMA_11G229500	GLYMA_11G229500	0.0368278	0.084749	0	0	0.0101168	0.0263395	0.00421683	0.0126372	0.00948994	0.0246475	2.22682	0.0230402	0.0248562	0.00924573	0	0	0.00454545	0.0116989	0	0	0.00244798	0.00426439	0.00135318	0.00486449	0.000543774	0.00395257	0.219512	0.0023596	0.0040201	0.00609756	0	0
GLYMA_07G260600	GLYMA_07G260600	0.0143574	0.00582099	0.0509909	0.0149695	0.0492215	2.26539	0	0.00289312	0.0074453	0.00354936	0	0.0151958	0.00791358	0.0299782	0	0	0.00227273	0.00101729	0.0196078	0.00331126	0.00734394	0.24307	0	0.000694927	0.00108755	0.00131752	0	0.00141576	0.00100503	0.00609756	0	0
GLYMA_13G150700	GLYMA_13G150700	0.0376829	0.00735586	0	0	0.0154067	0.00816308	0.0213038	0.0203955	0.00635717	0	0	0.0557343	0.00728807	2.27046	0.0587994	0.0194411	0.00378788	0.00254323	0	0	0.00305998	0.0021322	0.00405954	0.00694927	0.00108755	0	0	0.00707881	0.00100503	0.262195	0.0224719	0.003861
GLYMA_19G231300	GLYMA_19G231300	0.0157507	0	0	0	0	0	0	0.00249884	0	0	0	0.00346746	0	0	2.2921	0	0.00151515	0	0	0	0	0	0	0.000694927	0	0	0	0.000471921	0	0	0.202247	0
GLYMA_18G037800	GLYMA_18G037800	0.00446947	0.00227888	0	0	0.0737029	2.30733	0	0.00499229	0	0	0	0.0562422	0.00867352	0	0.0520907	0	0.000757576	0.000508647	0	0	0.00611995	0.200426	0	0.000694927	0	0	0	0.00519113	0.00201005	0	0.011236	0
GLYMA_14G177600	GLYMA_14G177600	0.0235997	0.00306045	0	0	0.00559922	0.00472904	0	0.0015117	0.00505836	0	0	0.00456116	0	2.31143	0.0912155	0	0.00227273	0.000508647	0	0	0.000611995	0.00426439	0	0.000694927	0.000543774	0	0	0.000943841	0	0.27439	0.0224719	0
GLYMA_17G236100	GLYMA_17G236100	0.0195468	0.0419008	2.32433	0.0402922	0.00897311	0	0.00621295	0.00289312	0.0037341	0	0	0.0130893	0.00440029	0.0485475	0	0	0.0030303	0.00610376	0.320261	0.00662252	0.00183599	0	0.00135318	0.000694927	0.00108755	0	0	0.00188768	0.00100503	0.00609756	0	0
GLYMA_04G183700	GLYMA_04G183700	0.00713348	0.00405837	0	0	0	0.0942389	0	0	0	0	0	0.0431882	0.0187951	0.0422561	2.33511	0.109348	0.000757576	0.00101729	0	0	0	0.0127932	0	0	0	0	0	0.00471921	0.00201005	0.00609756	0.202247	0.011583
GLYMA_01G092300	GLYMA_01G092300	0.0216832	0.0221795	0.0337775	0	0.00912206	0.0260341	0	0.0205345	0.00647524	0.0206652	0	0.0184759	0.0108316	2.36245	0	0	0.0030303	0.00559512	0.00653595	0	0.00122399	0.0021322	0	0.00416956	0.00163132	0.00263505	0	0.00141576	0.00301508	0.219512	0	0
GLYMA_08G359000	GLYMA_08G359000	0	0.00447359	0	0	0.00184837	0	0	0	0	0	0	0	0.00337483	0	2.37164	0	0	0.000508647	0	0	0.000611995	0	0	0	0	0	0	0	0.00100503	0	0.202247	0
GLYMA_20G196800	GLYMA_20G196800	0.00241728	0	0	0	0	0	0	0	0	0.0126079	2.43794	0	0	0	0	0	0.000757576	0	0	0	0	0	0	0	0	0.00131752	0.300813	0	0	0	0	0
GLYMA_15G144100	GLYMA_15G144100	0.00975832	0.0125071	0	0	0.0678475	2.43993	0.0277676	0.0164876	0.00399682	0	0	0.0644592	0.00626574	0.103102	0	0.0192857	0.00227273	0.00203459	0	0	0.00979192	0.294243	0.00405954	0.00416956	0.00163132	0	0	0.00566305	0.00100503	0.0182927	0	0.003861
GLYMA_10G182800	GLYMA_10G182800	0.00844647	0.0100731	0	0	0.0409368	2.44393	0.0053933	0	0.004708	0	0	0.00190444	0.0140417	0	0	0.0197393	0.00227273	0.00101729	0	0	0.00428397	0.272921	0.00135318	0	0.000543774	0	0	0.000471921	0.00301508	0	0	0.003861
GLYMA_16G156500	GLYMA_16G156500	0.0174139	0.00127576	0.0553917	0.0144533	0.0238703	2.45117	0	0.0167057	0.00144852	0.00935077	0	0.0175531	0.0105245	0	0.0520907	0.00974509	0.00151515	0.000508647	0.0196078	0.00331126	0.00367197	0.279318	0	0.00347464	0.000543774	0.00131752	0	0.0023596	0.00201005	0	0.011236	0.003861
GLYMA_02G032200	GLYMA_02G032200	0	0.0101198	0	0	0.0202901	0	0	0.0681238	0	0	0	0.00779522	0.00418064	2.46718	0	0	0	0.00406918	0	0	0.00611995	0	0	0.0208478	0	0	0	0.00141576	0.00100503	0.304878	0	0
GLYMA_08G160400	GLYMA_08G160400	0.00580073	0.00216815	2.48566	0.0194968	0.00180211	0	0	0.00819489	0	0	0	0.00919923	0.00672258	0	0	0	0.000757576	0.000508647	0.418301	0.00662252	0.000611995	0	0	0.000694927	0	0	0	0.000471921	0.00100503	0	0	0
GLYMA_11G175900	GLYMA_11G175900	0.0199566	0.0129722	0	0	0	0	0.0183324	0	0	0.00395771	2.49431	0	0	0	0	0	0.00151515	0.00152594	0	0	0	0	0.00270636	0	0	0.00131752	0.243902	0	0	0	0	0
GLYMA_08G071700	GLYMA_08G071700	0.0245698	0.00255473	0.015214	0	0.0144631	0	0	0.00617164	0	0.0183575	0	0.0215191	0.0301759	0.0233444	0	2.49479	0.00378788	0.000508647	0.00653595	0	0.00122399	0	0	0.000694927	0	0.00263505	0	0.00283152	0.00502513	0.00609756	0	0.285714
GLYMA_11G253200	GLYMA_11G253200	0.0135891	0.00663881	0	0	0.0613507	2.50117	0.00379361	0.00524473	0	0	0	0.0157949	0.0101031	0.0299782	0	0	0.00227273	0.00101729	0	0	0.00917993	0.275053	0.00135318	0.000694927	0	0	0	0.00188768	0.00201005	0.00609756	0	0
GLYMA_02G123800	GLYMA_02G123800	0.000891895	0.000600315	0	0	0	0	0	0.00399219	0.00153176	0.00307473	0	0.00351393	0.00562095	2.50821	0	0	0.000757576	0.000508647	0	0	0	0	0	0.00138985	0.000543774	0.00131752	0	0.000471921	0.00100503	0.347561	0	0
GLYMA_15G143600	GLYMA_15G143600	0.0383096	0.00328583	0	0	0.00112066	0	0	0.00350089	0	0.00738315	0	0.0175818	0	2.54342	0	0	0.0030303	0.000508647	0	0	0.000611995	0	0	0.000694927	0	0.00131752	0	0.00188768	0	0.304878	0	0
GLYMA_06G073700	GLYMA_06G073700	0.027429	0.0100434	0	0.0496034	0.119278	0.0665302	0.0193693	0.00730938	0.00476017	0.00943109	0	0.0507929	0.0106806	0.0403278	2.57419	0.063282	0.00378788	0.00152594	0	0.00993377	0.0189718	0.0170576	0.00270636	0.00208478	0.00108755	0.00131752	0	0.00566305	0.00201005	0.00609756	0.213483	0.015444
GLYMA_07G159100	GLYMA_07G159100	0.0161656	0.00995039	0	0.0109355	0.00557522	0	0	0	0	0.00562083	0	0.00562122	0.035958	0	0	2.57758	0.00227273	0.00101729	0	0.00331126	0.00122399	0	0	0	0	0.00131752	0	0.000943841	0.00100503	0	0	0.208494
GLYMA_18G265200	GLYMA_18G265200	0.00536297	0.0127057	0	0	0.0847655	2.59006	0	0	0.00532589	0	0	0.0100006	0.0192489	0	0	0.0280949	0.00151515	0.00152594	0	0	0.00979192	0.234542	0	0	0.000543774	0	0	0.00141576	0.0040201	0	0	0.00772201
GLYMA_14G012600	GLYMA_14G012600	0.00604127	0.00997774	0	0.0358361	0	0.00370559	0	0.00268208	0.00622114	0	0	0	0.0129734	0	0.0355793	2.59468	0.000757576	0.00152594	0	0.00331126	0	0.0021322	0	0.000694927	0.00163132	0	0	0	0.00201005	0	0.011236	0.239382
GLYMA_14G058500	GLYMA_14G058500	0	0.00497777	0	0.0710969	0.0110582	0.00342466	0	0.0315438	0.0137091	0.0246986	0.0780988	0.00699771	0.00359194	2.61243	0	0.0177491	0	0.00203459	0	0.013245	0.00305998	0.0021322	0	0.0076442	0.0021751	0.00527009	0.00813008	0.000943841	0.00100503	0.347561	0	0.00772201
GLYMA_17G070800	GLYMA_17G070800	0.037394	0.00488188	0	0	0.00381543	0	0.00703682	0	0	0.0384819	2.61472	0.00471449	0.00372094	0	0	0	0.00227273	0.00152594	0	0	0.000611995	0	0.00135318	0	0	0.00658762	0.268293	0.000471921	0.00100503	0	0	0
GLYMA_13G057600	GLYMA_13G057600	0.00889173	0.00352112	0	0	0.0808184	2.6305	0.0053933	0.00149126	0.00329161	0	0	0.00749081	0	0.00514345	0	0.0407279	0.000757576	0.00101729	0	0	0.00673195	0.28145	0.00135318	0.000694927	0.000543774	0	0	0.000471921	0	0.00609756	0	0.003861
GLYMA_02G209600	GLYMA_02G209600	0.0104926	0.00738156	0.035406	0.0159579	0.0523992	2.63304	0.00114096	0.0166958	0	0.0193515	0	0.0427545	0.0192654	0	0.0520907	0.026646	0.00151515	0.00203459	0.00653595	0.00331126	0.00673195	0.289979	0.00135318	0.00347464	0	0.00658762	0	0.00566305	0.0040201	0	0.011236	0.003861
GLYMA_08G249800	GLYMA_08G249800	0	0.0176358	0	0	0.00262772	0	0.00913077	0.000947154	0.00294888	0.0124292	0	0.00709808	0.00295813	2.66202	0	0	0	0.00203459	0	0	0.000611995	0	0.00135318	0.000694927	0.000543774	0.00263505	0	0.00141576	0.00100503	0.335366	0	0
GLYMA_16G094200	GLYMA_16G094200	0	0	2.7233	0	0.00180211	0	0.016442	0	0	0	0	0	0	0	0	0	0	0	0.366013	0	0.000611995	0	0.00135318	0	0	0	0	0	0	0	0	0
GLYMA_11G196200	GLYMA_11G196200	0	0.00620301	0	0.0156191	0	0.00370559	0	0	0.00568934	0.00381448	0	0.0219272	0.00668235	2.73122	0	0	0	0.000508647	0	0.00331126	0	0.0021322	0	0	0.00108755	0.00131752	0	0.00188768	0.00100503	0.310976	0	0
GLYMA_08G142600	GLYMA_08G142600	0	0.0083885	2.74351	0.0311501	0.059831	0.0386267	0	0.0105911	0	0	0	0.0367242	0.0125471	0.0869838	0.0800852	0	0	0.00203459	0.48366	0.00331126	0.0128519	0.0021322	0	0.00277971	0	0	0	0.00424729	0.00100503	0.00609756	0.011236	0
GLYMA_18G238600	GLYMA_18G238600	0.00404115	0.00188807	0	0	0.00205644	0	0.00611192	0	0.005021	0	2.75213	0	0	0.0040683	0	0	0.00151515	0.000508647	0	0	0.000611995	0	0.00135318	0	0.000543774	0	0.243902	0	0	0.00609756	0	0
GLYMA_19G223100	GLYMA_19G223100	0.00839884	0	0	0	0	0	0.00927471	0.00815824	0.00462786	0.00888289	0	0.0176871	0.00344423	0	2.7658	0.0461015	0.000757576	0	0	0	0	0	0.00135318	0.00208478	0.000543774	0.00263505	0	0.00141576	0.00100503	0	0.224719	0.003861
GLYMA_15G252800	GLYMA_15G252800	0.00689646	0.00421474	0	0	0.0259875	2.78361	0	0	0.00222949	0.00918411	0	0.029248	0.00274597	0.00514345	0	0.0128529	0.000757576	0.00101729	0	0	0.00244798	0.294243	0	0	0.000543774	0.00263505	0	0.00283152	0.00100503	0.00609756	0	0.003861
GLYMA_20G234100	GLYMA_20G234100	0.0068808	0.000881537	0.0116526	0	0.0606916	2.81438	0.00674566	0	0.00298777	0.00576539	0	0	0	0	0	0	0.000757576	0.000508647	0.00653595	0	0.00428397	0.30064	0.00135318	0	0.000543774	0.00263505	0	0	0	0	0	0
GLYMA_02G030700	GLYMA_02G030700	0.00884907	0.00298231	0	0.0597749	0.0122605	0.0367907	0	0.015536	0	0.00350965	0	0.0273313	0	0.0264651	2.83529	0	0.00151515	0.00101729	0	0.00662252	0.00305998	0.00852878	0	0.00416956	0	0.00131752	0	0.000471921	0	0.00609756	0.213483	0
GLYMA_11G032100	GLYMA_11G032100	0	0.00644673	0	0	0	0	0	0.00582504	0	0	0	0.0115338	0.00282152	0	2.84096	0.0247749	0	0.000508647	0	0	0	0	0	0.000694927	0	0	0	0.00141576	0.00100503	0	0.202247	0.00772201
GLYMA_11G044500	GLYMA_11G044500	0.0152787	0	0	0	0.017437	0.0505399	0.00422473	0.0038415	0.00563496	0	0	0.0137753	0.00255927	2.8419	0	0.0290301	0.0030303	0	0	0	0.00244798	0.00852878	0.00135318	0.000694927	0.000543774	0	0	0.00188768	0.00100503	0.286585	0	0.003861
GLYMA_10G155200	GLYMA_10G155200	0	0	0	0	0	0	0.0140736	0	0.00460435	0	0	0	0.00342778	0.0211281	2.84421	0.0505367	0	0	0	0	0	0	0.00135318	0	0.000543774	0	0	0	0.00100503	0.00609756	0.213483	0.003861
GLYMA_20G207200	GLYMA_20G207200	0.0035467	0.00810348	0	0	0.0483841	2.84972	0.00566896	0.0030654	0.0108864	0.00878349	0	0.0072794	0.0100017	0.0102869	0	0.00334489	0.000757576	0.00152594	0	0	0.00611995	0.272921	0.00135318	0.000694927	0.000543774	0.00131752	0	0.000943841	0.0040201	0.00609756	0	0.003861
GLYMA_20G210900	GLYMA_20G210900	0.124705	0.0237696	0	0	0.00134593	0	0.0123128	0.00340067	0.00506189	0.0299372	2.85254	0.00455522	0.00195568	0.00757649	0	0	0.00909091	0.00457782	0	0	0.000611995	0	0.00135318	0.000694927	0.00108755	0.00395257	0.268293	0.000471921	0.00100503	0.00609756	0	0
GLYMA_16G128800	GLYMA_16G128800	0.00164941	0.00230672	0	0	0.040568	2.86765	0	0.0111014	0	0	0	0.00317792	0.00359194	0	0	0	0.000757576	0.00101729	0	0	0.00489596	0.266525	0	0.00208478	0	0	0	0.000471921	0.00100503	0	0	0
GLYMA_14G040300	GLYMA_14G040300	0.0427557	0.0130476	0	0.0401206	0.0217635	0.00439809	0.00447184	0.00761245	0.00289858	0.0048743	0.0725253	0.137734	0.0532052	0.117653	2.8929	0.0455161	0.00606061	0.00254323	0	0.00662252	0.00305998	0.0021322	0.00135318	0.00208478	0.000543774	0.00131752	0.00813008	0.0169891	0.0100503	0.0182927	0.258427	0.00772201
GLYMA_11G095700	GLYMA_11G095700	0.0152396	0	0	0	0.0838787	2.90223	0	0.00123018	0	0	0	0.0151479	0.00322433	0.0460262	0	0	0.00227273	0	0	0	0.00795594	0.304904	0	0.000694927	0	0	0	0.00283152	0.00100503	0.0121951	0	0
GLYMA_04G173200	GLYMA_04G173200	0.0313171	0.00714441	0.0347657	0.0159579	0.0307728	2.9175	0	0.0106202	0.00247809	0.0599459	0	0.0186668	0.0272401	0	0.104181	0	0.00378788	0.00203459	0.0130719	0.00331126	0.00305998	0.253731	0	0.00138985	0.00108755	0.00527009	0	0.0023596	0.00301508	0	0.011236	0
GLYMA_08G336300	GLYMA_08G336300	0	0.00404009	0	0	0.100218	2.9179	0	0.00870096	0.0128401	0.00512655	0	0.0322056	0.012108	0	0	0.0505877	0	0.000508647	0	0	0.00917993	0.223881	0	0.00138985	0.0021751	0.00131752	0	0.00283152	0.00201005	0	0	0.015444
GLYMA_02G302800	GLYMA_02G302800	0	0	0	0	0.0581154	2.91926	0	0.00891207	0.0111664	0.0102455	0.0976	0.0308209	0.0138254	0	0	0	0	0	0	0	0.00795594	0.277186	0	0.00138985	0.00271887	0.00263505	0.00813008	0.00283152	0.00301508	0	0	0
GLYMA_17G109800	GLYMA_17G109800	0.0249989	0.00490882	0	0	0.00334983	0.0150792	0.00870981	0	0	0	2.92344	0.002149	0.0027207	0.0468066	0	0	0.00227273	0.00101729	0	0	0.00122399	0.0021322	0.00270636	0	0	0	0.300813	0.000471921	0.00100503	0.0121951	0	0
GLYMA_05G026100	GLYMA_05G026100	0	0	0	0	0	0	0	0.00417624	0	0.0126079	2.9347	0	0.00574957	0	0	0	0	0	0	0	0	0	0	0.000694927	0	0.00131752	0.292683	0	0.00100503	0	0	0
GLYMA_09G025500	GLYMA_09G025500	0.00470252	0.00878417	0	0.0223432	0.0777615	2.93955	0.0256864	0.00182731	0	0	0	0.031239	0	0.0221006	0.0732939	0.0243443	0.000757576	0.00152594	0	0.00331126	0.00979192	0.238806	0.00405954	0.000694927	0	0	0	0.00330345	0	0.00609756	0.011236	0.003861
GLYMA_13G352300	GLYMA_13G352300	0	0.0148318	0	0	0.0140822	0	0	0.00810055	0.0148518	0	0	0.0113425	0.00644959	0	0.065743	2.94628	0	0.00254323	0	0	0.00244798	0	0	0.00208478	0.00271887	0	0	0.00141576	0.00201005	0	0.0224719	0.258687
GLYMA_12G197000	GLYMA_12G197000	0	0.00685718	0	0	0.0307137	0.0213007	0	0	0	0	0	0.0528283	0.0502607	0	2.95438	0.0343904	0	0.00101729	0	0	0.00428397	0.0021322	0	0	0	0	0	0.00896649	0.00603015	0	0.202247	0.00772201
GLYMA_01G125200	GLYMA_01G125200	0.00538317	0.00372954	0	0	0.0783392	0.0921038	0.0108321	0.0334413	0	0.0143036	0	0.0472435	0.00845269	2.97362	0	0	0.00151515	0.00101729	0	0	0.0146879	0.0127932	0.00270636	0.00833912	0	0.00527009	0	0.00566305	0.00100503	0.237805	0	0
GLYMA_07G135100	GLYMA_07G135100	0.00878995	0	0	0.0074427	0.00344786	0.0139268	0	0	0	0	0	0.0426911	0.0123758	0	2.98639	0.0506973	0.00151515	0	0	0.00331126	0.000611995	0.0021322	0	0	0	0	0	0.00330345	0.00201005	0	0.224719	0.00772201
GLYMA_02G046200	GLYMA_02G046200	0	0	0	0.0109355	0.0485285	3.03004	0	0	0	0	0	0.012941	0.0124845	0.00514345	0	0	0	0	0	0.00331126	0.00611995	0.283582	0	0	0	0	0	0.00141576	0.00201005	0.00609756	0	0
GLYMA_14G214100	GLYMA_14G214100	0	0	0	0	0.00108548	0	0	0	0	0	3.04256	0	0.00443916	0	0	0	0	0	0	0	0.000611995	0	0	0	0	0	0.211382	0	0.00100503	0	0	0
GLYMA_16G010500	GLYMA_16G010500	0.00887091	0.0050007	0	0	0.0624513	3.05071	0.00317275	0.0136549	0.0109223	0	0	0.0221546	0.0151517	0.00514345	0	0	0.000757576	0.00203459	0	0	0.00917993	0.315565	0.00135318	0.00277971	0.00163132	0	0	0.0023596	0.00301508	0.00609756	0	0
GLYMA_06G000600	GLYMA_06G000600	0.00165013	0.00483198	0	0	0.052395	3.0549	0	0	0	0.0336518	0	0.0113002	0	0	0	0.0124669	0.000757576	0.00101729	0	0	0.00489596	0.296375	0	0	0	0.00527009	0	0.00141576	0	0	0	0.003861
GLYMA_10G084000	GLYMA_10G084000	0.00952925	0.00352737	3.06725	0.0816681	0.0100502	0	0	0.00886857	0	0	0	0	0	0	0	0	0.000757576	0.000508647	0.48366	0.013245	0.00244798	0	0	0.00138985	0	0	0	0	0	0	0	0
GLYMA_01G209900	GLYMA_01G209900	0	0.00385631	0	0	0.00102169	0.00662173	0	0	0.00107529	0	0	0	0.0126418	0	3.09776	0	0	0.000508647	0	0	0.000611995	0.0021322	0	0	0.000543774	0	0	0	0.00100503	0	0.235955	0
GLYMA_06G314100	GLYMA_06G314100	0	0.00504967	3.11199	0.0372542	0.00214209	0.0131536	0.00574355	0.00281918	0.00175808	0	0	0.0127147	0.0089098	0	0	0.0397223	0	0.00152594	0.48366	0.00662252	0.000611995	0.0021322	0.00135318	0.000694927	0.000543774	0	0	0.00141576	0.00100503	0	0	0.003861
GLYMA_11G084500	GLYMA_11G084500	0.00289151	0	0	0.0439742	0.0556095	3.14172	0.00785819	0	0	0	0	0.0131335	0.00148453	0	0	0	0.000757576	0	0	0.00331126	0.00611995	0.339019	0.00135318	0	0	0	0	0.00141576	0.00100503	0	0	0
GLYMA_11G161800	GLYMA_11G161800	0	0.0698309	3.14421	0.0274565	0.068675	0	0.0170505	0.0200406	0.0110305	0	0	0.00926761	0.00732257	0.0254915	0	0	0	0.0142421	0.294118	0.00331126	0.0104039	0	0.00405954	0.00416956	0.00271887	0	0	0.00188768	0.00201005	0.00609756	0	0
GLYMA_19G211000	GLYMA_19G211000	0.0663479	0.00717991	0	0.0686271	0.00844294	0	0.00542357	0	0.0143807	0	0.0150613	0.019219	0.0711699	0	0	3.16382	0.00757576	0.00152594	0	0.00331126	0.00183599	0	0.00135318	0	0.00271887	0	0.00813008	0.00188768	0.0080402	0	0	0.312741
GLYMA_15G186500	GLYMA_15G186500	0	0.00206348	0	0.0362679	0.00888237	0.0116803	0.0085482	0.00926569	0.00811342	0.0176028	0	0.0385805	0.0150493	3.19942	0.0208847	0.0253015	0	0.000508647	0	0.00331126	0.000611995	0.00426439	0.00135318	0.000694927	0.00108755	0.00395257	0	0.00519113	0.00201005	0.384146	0.011236	0.003861
GLYMA_17G233200	GLYMA_17G233200	0.0142827	0.0070771	0.0784628	0	0.114529	3.25131	0.0252728	0.0172952	0.00318555	0.00817875	0	0.0769575	0.016184	0.00514345	0	0	0.00151515	0.00101729	0.00653595	0	0.0159119	0.377399	0.00541272	0.00208478	0.000543774	0.00263505	0	0.00896649	0.00301508	0.00609756	0	0
GLYMA_11G012400	GLYMA_11G012400	0	0.014212	0	0	0.0732535	3.2528	0	0	0	0	0	0.02006	0.0135328	0.0336101	0	0	0	0.00152594	0	0	0.00673195	0.28145	0	0	0	0	0	0.0023596	0.00201005	0.0121951	0	0
GLYMA_19G188400	GLYMA_19G188400	0.00464573	0.00461325	3.26126	0.0808536	0.0164227	0	0	0	0	0	0	0.00431372	0.00843142	0	0	0	0.00151515	0.00101729	0.509804	0.00993377	0.00183599	0	0	0	0	0	0	0.000471921	0.00100503	0	0	0
GLYMA_05G010300	GLYMA_05G010300	0.0197318	0.00471843	0	0.0235509	0.0177498	0.0284392	0.0133846	0.0142831	0.0019999	0.0015524	0	0.0121584	0.0163271	0.00650754	0.0301636	3.26825	0.00378788	0.000508647	0	0.00331126	0.00183599	0.00426439	0.00135318	0.00208478	0.000543774	0.00131752	0	0.000943841	0.00201005	0.00609756	0.011236	0.320463
GLYMA_06G199700	GLYMA_06G199700	0	0	0	0	0.00168408	0	0	0	0	0	0	0	0.0045251	0	3.28607	0.0124669	0	0	0	0	0.000611995	0	0	0	0	0	0	0	0.00100503	0	0.247191	0.003861
GLYMA_19G212400	GLYMA_19G212400	0.00165844	0.0653638	3.28988	0.0674355	0.0420032	0	0.0116754	0.0606393	0.00252918	0.00858321	0	0	0	0	0	0	0.000757576	0.00661241	0.30719	0.00662252	0.00489596	0	0.00135318	0.00694927	0.000543774	0.00131752	0	0	0	0	0	0
GLYMA_14G028300	GLYMA_14G028300	0.00974374	0	0	0	0	0.0118768	0	0.0171716	0.0048079	0	3.29502	0.00482537	0	0.00549033	0	0	0.000757576	0	0	0	0	0.00426439	0	0.00138985	0.000543774	0	0.243902	0.000471921	0	0.00609756	0	0
GLYMA_13G161500	GLYMA_13G161500	0.0021608	0.0424734	0	0	0	0	0	0	0	0.0925574	3.29721	0	0.00892954	0.0040683	0	0.0113609	0.000757576	0.0076297	0	0	0	0	0	0	0	0.0158103	0.317073	0	0.00201005	0.00609756	0	0.003861
GLYMA_01G181600	GLYMA_01G181600	0.00775791	0.00554973	0	0	0.00209803	0	0	0	0.00553741	0	3.32336	0.00454644	0.0116592	0.0258318	0	0	0.00151515	0.00101729	0	0	0.000611995	0	0	0	0.000543774	0	0.276423	0.000471921	0.00100503	0.0121951	0	0
GLYMA_15G143900	GLYMA_15G143900	0	0	0	0	0.00441555	0	0	0	0.00165532	0.0477284	3.32813	0.00377235	0	0	0	0.0124952	0	0	0	0	0.000611995	0	0	0	0.000543774	0.00790514	0.219512	0.000471921	0	0	0	0.003861
GLYMA_18G082000	GLYMA_18G082000	0.00118817	0.0126644	0	0.0216989	0.0494813	3.32989	0.00342231	0	0	0.0054669	0	0.0151956	0	0.0102869	0	0	0.000757576	0.00254323	0	0.00331126	0.0104039	0.336887	0.00135318	0	0	0.00131752	0	0.0023596	0	0.00609756	0	0
GLYMA_06G151900	GLYMA_06G151900	0.00622648	0	0	0.0190961	0.0190353	0	0	0.0123352	0.00347645	0	0	0.0123454	0.0226521	3.33754	0	0	0.00151515	0	0	0.00331126	0.00244798	0	0	0.00347464	0.00108755	0	0	0.00141576	0.00301508	0.365854	0	0
GLYMA_06G270000	GLYMA_06G270000	0.030303	0.00945441	0	0	0	0.0031273	0.00114096	0	0	0.0138105	0	0.0182209	0.0188859	0	3.34167	0.0249338	0.000757576	0.000508647	0	0	0	0.0021322	0.00135318	0	0	0.00131752	0	0.000471921	0.00201005	0	0.258427	0.003861
GLYMA_02G249300	GLYMA_02G249300	0.0380106	0.0052403	0	0	0.0204445	0	0.0108805	0.00170034	0	0.0103254	3.38475	0	0	0	0	0	0.0030303	0.00101729	0	0	0.00183599	0	0.00270636	0.000694927	0	0.00131752	0.317073	0	0	0	0	0
GLYMA_08G174300	GLYMA_08G174300	0.030846	0.00208547	0	0	0.0712279	3.38483	0.01471	0.0132151	0.00293168	0.0104565	0	0.0339279	0.020264	0.00514345	0.0404608	0	0.00227273	0.000508647	0	0	0.00795594	0.328358	0.00270636	0.00208478	0.00108755	0.00131752	0	0.00377537	0.00301508	0.00609756	0.011236	0
GLYMA_08G243100	GLYMA_08G243100	0	0.00554421	0	0	0.0865732	3.39806	0.00230485	0.0225866	0.0059559	0	0	0.0176546	0.0129224	0	0.0995213	0	0	0.00152594	0	0	0.0104039	0.294243	0.00135318	0.00347464	0.000543774	0	0	0.00283152	0.00201005	0	0.011236	0
GLYMA_03G056200	GLYMA_03G056200	0.00618825	0.0275298	0	0	0.0210291	0	0.00747613	0.0246415	0.0152343	0.0874006	0	0.0309326	0.0162687	3.4101	0	0.0420915	0.00151515	0.00406918	0	0	0.00367197	0	0.00135318	0.00555942	0.00326264	0.00790514	0	0.00283152	0.00201005	0.390244	0	0.011583
GLYMA_03G264000	GLYMA_03G264000	0.0145119	0.00122802	0	0	0.0106778	0.0104535	0	0	0.00356339	0.00307473	0	0.0323203	0.00834087	3.4317	0.0603273	0	0.00227273	0.000508647	0	0	0.00122399	0.00426439	0	0	0.000543774	0.00131752	0	0.00660689	0.00201005	0.414634	0.011236	0
GLYMA_03G175300	GLYMA_03G175300	0.0173315	0.00146415	0	0	0.014393	0	0	0	0	0.0242611	3.52057	0.00956169	0.00678155	0.0162732	0	0	0.0030303	0.000508647	0	0	0.00122399	0	0	0	0	0.00263505	0.308943	0.000943841	0.00100503	0.00609756	0	0
GLYMA_14G037100	GLYMA_14G037100	0.0166943	0.00555898	0	0	0.072194	3.5311	0.0108168	0.0161723	0.0018458	0.0160302	0	0.0121076	0	0.00514345	0	0	0.00151515	0.000508647	0	0	0.00856793	0.328358	0.00135318	0.00138985	0.000543774	0.00263505	0	0.00188768	0	0.00609756	0	0
GLYMA_03G174100	GLYMA_03G174100	0.00385928	0.00404009	0.0592024	0	0.0102856	0.00703463	0.0236257	0.00986905	0.00504897	0.0155314	0.0244147	0.0499731	0.0125313	0.0797679	0.0485774	3.54302	0.000757576	0.000508647	0.00653595	0	0.000611995	0.0021322	0.00270636	0.00138985	0.000543774	0.00395257	0.00813008	0.00802265	0.00201005	0.0121951	0.011236	0.362934
GLYMA_14G154200	GLYMA_14G154200	0.00344823	0.0191694	0	0	0.0186493	3.55423	0.00758722	0.00380526	0.0125923	0	0	0.0228198	0.0038819	0	0	0	0.000757576	0.00254323	0	0	0.00305998	0.326226	0.00135318	0.00138985	0.0021751	0	0	0.0023596	0.00100503	0	0	0
GLYMA_10G168300	GLYMA_10G168300	0.00866005	0.028787	0	0.0693532	0.00150663	0.00370559	0	0.00748422	0	0	0	0.0122173	0.0233966	3.55797	0	0	0.00151515	0.00356053	0	0.00662252	0.000611995	0.0021322	0	0.00138985	0	0	0	0.00188768	0.0040201	0.27439	0	0
GLYMA_16G116500	GLYMA_16G116500	0	0.0146157	0	0	0.0207739	0.00392308	0.0054829	0	0.00771202	0	0	0.0114458	0	0	3.57966	0	0	0.00305188	0	0	0.00305998	0.0021322	0.00135318	0	0.00163132	0	0	0.00188768	0	0	0.269663	0
GLYMA_08G130500	GLYMA_08G130500	0	0.00300087	0	0	0	0	0	0.00110446	0.00278288	0	0	0.00454644	0	0.0384229	3.58514	0.0689747	0	0.000508647	0	0	0	0	0	0.000694927	0.000543774	0	0	0.000471921	0	0.0121951	0.292135	0.015444
GLYMA_14G068300	GLYMA_14G068300	0.0107002	0.0877523	3.60028	0	0.0248718	0.0119184	0	0.00287874	0.0101304	0.00565703	0	0.00913643	0.00148453	0	0	0	0.000757576	0.0152594	0.418301	0	0.00305998	0.0021322	0	0.000694927	0.0021751	0.00131752	0	0.000943841	0.00100503	0	0	0
GLYMA_13G286900	GLYMA_13G286900	0.0201057	0.0129691	0.0142179	0.0233352	0.0727331	0.121973	0.0185846	0	0.0116777	0	0	0.0227014	0.00815039	3.60767	0.052431	0	0.00227273	0.00203459	0.00653595	0.00331126	0.0122399	0.0255864	0.0067659	0	0.00163132	0	0	0.00330345	0.00201005	0.426829	0.011236	0
GLYMA_14G205300	GLYMA_14G205300	0.00848218	0	0	0	0.00909538	0.0256127	0.00228192	0	0.00655115	0.0111466	0	0.00586649	0.00218341	0	3.64875	0.0328317	0.00227273	0	0	0	0.00122399	0.00426439	0.00135318	0	0.00108755	0.00131752	0	0.000943841	0.00100503	0	0.280899	0.003861
GLYMA_19G137500	GLYMA_19G137500	0.0167112	0.0338624	0.0599079	0.0673338	0.0803982	3.65938	0.0340982	0.0147719	0.00284578	0.0207934	0	0.0239458	0.00762353	0.0936645	0.0450519	0.0407279	0.000757576	0.00356053	0.00653595	0.00993377	0.00795594	0.36887	0.00405954	0.00277971	0.00108755	0.00263505	0	0.00377537	0.00201005	0.00609756	0.011236	0.003861
GLYMA_14G016800	GLYMA_14G016800	0.011314	0.00488979	0	0	0.0767504	3.66726	0	0.00504938	0.00877868	0	0	0.05686	0.0156889	0	0.127681	0.0407279	0.00151515	0.00101729	0	0	0.00917993	0.317697	0	0.00138985	0.00163132	0	0	0.00613497	0.00301508	0	0.011236	0.003861
GLYMA_17G100800	GLYMA_17G100800	0.0161219	0.00224568	0	0	0.00841809	0	0	0	0.00264739	0	3.69457	0.00248772	0.00493143	0	0	0	0.00151515	0.000508647	0	0	0.000611995	0	0	0	0.000543774	0	0.235772	0.000471921	0.00100503	0	0	0
GLYMA_03G049800	GLYMA_03G049800	0.00327955	0.00756076	0	0	0	0	0.012321	0	0.00826097	0.00908643	0.158597	0.00755073	0	3.69845	0	0	0.000757576	0.00203459	0	0	0	0	0.00270636	0	0.00108755	0.00263505	0.0243902	0.000471921	0	0.396341	0	0
GLYMA_09G143500	GLYMA_09G143500	0.0148251	0.0171173	0	0	0.0209803	0.0945116	0.0187736	0.0298535	0.0922639	0.00506935	0	0.0179829	0.0125094	0	0	3.70442	0.00151515	0.00356053	0	0	0.00244798	0.00426439	0.00270636	0.00486449	0.0146819	0.00131752	0	0.00188768	0.00201005	0	0	0.220077
GLYMA_05G216100	GLYMA_05G216100	0.00952925	0.00572801	0	0.0183044	0.00678063	0.00812575	0	0	0	0	0	0	0.0246086	0.00650754	0	3.7126	0.000757576	0.000508647	0	0.00331126	0.00122399	0.0021322	0	0	0	0	0	0	0.00301508	0.00609756	0	0.254826
GLYMA_11G027600	GLYMA_11G027600	0.0173296	0.011443	3.72081	0	0.0164574	0.00471516	0.00400823	0	0.00585416	0	0	0.00756484	0	0	0	0	0.00227273	0.00254323	0.509804	0	0.00244798	0.0021322	0.00135318	0	0.00108755	0	0	0.000943841	0	0	0	0
GLYMA_15G195600	GLYMA_15G195600	0.0184319	0.00132288	0	0	0	0	0	0.00215414	0.00700825	0.00291423	0	0.00301162	0.0125135	0	3.72812	0.0290301	0.00378788	0.000508647	0	0	0	0	0	0.000694927	0.00163132	0.00131752	0	0.000471921	0.00301508	0	0.247191	0.003861
GLYMA_09G266000	GLYMA_09G266000	0	0	0	0	0.00320584	0	0	0.0171287	0	0	0	0.0458496	0	3.74347	0.0732939	0.0675001	0	0	0	0	0.000611995	0	0	0.00208478	0	0	0	0.00283152	0	0.219512	0.011236	0.003861
GLYMA_13G104800	GLYMA_13G104800	0	0	0	0.0121962	0.00292093	0	0.00114096	0	0.00204657	0	0	0.00542438	0.00285114	0	3.74775	0.0990711	0	0	0	0.00331126	0.00122399	0	0.00135318	0	0.000543774	0	0	0.000471921	0.00100503	0	0.213483	0.00772201
GLYMA_14G162000	GLYMA_14G162000	0.0125802	0	0	0	0.00311448	0	0	0	0	0	0	0.00426691	0	0.0211281	3.75416	0	0.00227273	0	0	0	0.000611995	0	0	0	0	0	0	0.000471921	0	0.00609756	0.303371	0
GLYMA_17G261000	GLYMA_17G261000	0.0101831	0	0	0	0	0	0	0.00101791	0	0	0	0.00107622	0.00619621	0.00549033	3.83393	0.0625239	0.00151515	0	0	0	0	0	0	0.000694927	0	0	0	0.000471921	0.00100503	0.00609756	0.280899	0.019305
GLYMA_14G205000	GLYMA_14G205000	0	0	0	0	0	0.00478285	0	0.00121725	0	0	0	0	0	0	3.83501	0	0	0	0	0	0	0.0021322	0	0.000694927	0	0	0	0	0	0	0.235955	0
GLYMA_19G218300	GLYMA_19G218300	0.0322068	0.00825275	0	0	0.00806318	0	0.00114096	0.00216556	0.00380794	0.00728518	0.187577	0.00918134	0	0	3.86493	0	0.00378788	0.00152594	0	0	0.000611995	0	0.00135318	0.000694927	0.000543774	0.00263505	0.0243902	0.000471921	0	0	0.213483	0
GLYMA_07G133900	GLYMA_07G133900	0.00788776	0	0	0	0.00462232	0	0	0	0.00343508	0.00614947	0	0.00785741	0.00840128	3.88313	0	0	0.00151515	0	0	0	0.000611995	0	0	0	0.000543774	0.00131752	0	0.000943841	0.00201005	0.280488	0	0
GLYMA_13G362100	GLYMA_13G362100	0.0193571	0.00548759	0.015214	0	0.0960203	3.91047	0	0.00398925	0.00175468	0.0189033	0	0.0103421	0.00884523	0	0	0	0.00151515	0.00101729	0.00653595	0	0.00917993	0.339019	0	0.000694927	0.000543774	0.00395257	0	0.00141576	0.00301508	0	0	0
GLYMA_11G219600	GLYMA_11G219600	0.00237002	0.0104365	0	0.0256444	0.194803	3.91429	0	0.0139682	0	0	0	0.0322873	0.0357644	0.0790555	0.0534028	0	0.000757576	0.00101729	0	0.00662252	0.0201958	0.285714	0	0.00277971	0	0	0	0.00330345	0.00502513	0.0182927	0.011236	0
GLYMA_09G038500	GLYMA_09G038500	0.00918274	0.0119327	0	0	0	0	0	0.0129749	0	0.00441974	0.0961003	0.00821153	0.00255927	3.92173	0	0	0.000757576	0.00152594	0	0	0	0	0	0.00138985	0	0.00131752	0.00813008	0.00188768	0.00100503	0.378049	0	0
GLYMA_12G021800	GLYMA_12G021800	0.0179886	0.00483965	0.0978435	0	0.0793162	3.94808	0	0	0.0125986	0.00962373	0	0.0245854	0.00740077	0.0154304	0	0	0.00227273	0.000508647	0.00653595	0	0.00856793	0.319829	0	0	0.00163132	0.00263505	0	0.0023596	0.00100503	0.00609756	0	0
GLYMA_03G194700	GLYMA_03G194700	0.0216106	0	0	0	0.00452153	0	0	0.00233746	0.0118809	0	0	0.00772374	0.0240301	0	0.0603273	3.94892	0.00151515	0	0	0	0.00122399	0	0	0.000694927	0.00163132	0	0	0.000471921	0.00201005	0	0.011236	0.220077
GLYMA_14G224000	GLYMA_14G224000	0.0188147	0.0109935	0	0	0.0469099	3.96336	0	0	0	0.0184527	0	0.0146512	0.0206278	0.0463324	0	0	0.00151515	0.00101729	0	0	0.00795594	0.400853	0	0	0	0.00131752	0	0.00283152	0.0040201	0.0182927	0	0
GLYMA_06G242000	GLYMA_06G242000	0	0	0	0	0.00620685	0	0	0	0	0.0104648	0	0	0	0	3.97627	0	0	0	0	0	0.000611995	0	0	0	0	0.00131752	0	0	0	0	0.258427	0
GLYMA_15G063200	GLYMA_15G063200	0.00263139	0.0206158	0.187893	0	0.171676	4.01227	0.00748283	0.0360473	0.00142948	0.0142281	0	0.0703271	0.0614697	0.0299782	0.0450519	0.0192857	0.000757576	0.00305188	0.0588235	0	0.0201958	0.411514	0.00270636	0.00555942	0.000543774	0.00131752	0	0.00849457	0.0130653	0.00609756	0.011236	0.003861
GLYMA_13G133200	GLYMA_13G133200	0.0129081	0.00733424	0	0	0.101311	4.02066	0	0.00393503	0.00999656	0.0240863	0	0.00574055	0.0216147	0.0299782	0	0	0.00227273	0.00101729	0	0	0.00917993	0.371002	0	0.000694927	0.00163132	0.00131752	0	0.00141576	0.0040201	0.00609756	0	0
GLYMA_18G231200	GLYMA_18G231200	0	0	0	0	0.00352938	0	0	0	0	0	0	0.00438996	0	0	4.02137	0	0	0	0	0	0.000611995	0	0	0	0	0	0	0.000471921	0	0	0.202247	0
GLYMA_03G215900	GLYMA_03G215900	0.00846453	0.00703962	4.05963	0.0161841	0.0092221	0	0	0.00606967	0.0012947	0	0	0	0.00807486	0	0	0	0.000757576	0.00152594	0.509804	0.00331126	0.00183599	0	0	0.00138985	0.000543774	0	0	0	0.00201005	0	0	0
GLYMA_10G024700	GLYMA_10G024700	0.0216883	0	4.08921	0.0250801	0.0025932	0	0	0.00492507	0.00181137	0	0	0.00152183	0	0	0	0	0.0030303	0	0.477124	0.00662252	0.000611995	0	0	0.000694927	0.000543774	0	0	0.000471921	0	0	0	0
GLYMA_12G213200	GLYMA_12G213200	0.0153185	0.000501229	0	0	0	0	0	0	0	0.0232484	0	0	0.00926467	0	4.11146	0.0633696	0.00151515	0.000508647	0	0	0	0	0	0	0	0.00263505	0	0	0.00201005	0	0.280899	0.011583
GLYMA_08G085200	GLYMA_08G085200	0.00527591	0.00183296	0	0	0.0165688	0	0.00342288	0.00713477	0.00271887	0	0	0	0	0.0211281	4.11966	0	0.00151515	0.000508647	0	0	0.00122399	0	0.00135318	0.000694927	0.000543774	0	0	0	0	0.00609756	0.303371	0
GLYMA_15G011700	GLYMA_15G011700	0.00563121	0	0	0	0.0668574	4.14048	0.00353218	0	0	0	0	0.00969302	0	0	0	0	0.00151515	0	0	0	0.00795594	0.339019	0.00135318	0	0	0	0	0.000943841	0	0	0	0
GLYMA_13G087200	GLYMA_13G087200	0.0128451	0	0	0.0436841	0.0120136	0	0	0.00500307	0.00384292	0.0082759	0	0.0290821	0.0409277	0	0.146301	4.14063	0.00227273	0	0	0.00331126	0.00183599	0	0	0.000694927	0.000543774	0.00131752	0	0.00330345	0.00603015	0	0.011236	0.247104
GLYMA_14G023200	GLYMA_14G023200	0.00486699	0.0196322	0.0978435	0.0417035	0.136947	0.0637952	0.035569	0.0160765	0.00914119	0.011053	4.17931	0.0645643	0.0261946	0	0	0	0.00151515	0.00356053	0.00653595	0.00331126	0.0208078	0.010661	0.00541272	0.00416956	0.0021751	0.00131752	0.292683	0.00849457	0.00301508	0	0	0
GLYMA_08G041400	GLYMA_08G041400	0.0134561	0	0	0.0272981	0	0	0	0	0	0	0	0	0	0	4.18174	0	0.000757576	0	0	0.00331126	0	0	0	0	0	0	0	0	0	0	0.258427	0
GLYMA_01G205500	GLYMA_01G205500	0.010101	0.00385631	0.18912	0	0	0	0	0.00713477	0	0.00172722	0	0	0	0	4.24115	0	0.000757576	0.000508647	0.0196078	0	0	0	0	0.000694927	0	0.00131752	0	0	0	0	0.247191	0
GLYMA_04G052100	GLYMA_04G052100	0.0759567	0.0762	4.24962	0.0141446	0.0636897	0.0146442	0.140998	0.0288404	0.0203294	0.0558584	0	0.00855101	0.0117575	0	0	0	0.00984848	0.0152594	0.359477	0.00331126	0.00611995	0.0021322	0.0189445	0.00208478	0.00435019	0.0105402	0	0.00141576	0.00201005	0	0	0
GLYMA_14G062300	GLYMA_14G062300	0.00648959	0	0	0	0	0	0.00936457	0	0.0066006	0.00729963	0	0.0236885	0.00476315	4.25124	0	0.0504136	0.00151515	0	0	0	0	0	0.00135318	0	0.00108755	0.00263505	0	0.00141576	0.00100503	0.317073	0	0.00772201
GLYMA_10G150600	GLYMA_10G150600	0	0	4.26405	0.040234	0	0	0	0	0	0.0210162	0	0.00242883	0.00148453	0	0	0	0	0	0.437908	0.00331126	0	0	0	0	0	0.00395257	0	0.000471921	0.00100503	0	0	0
GLYMA_20G021500	GLYMA_20G021500	0.033976	0.00331366	0	0	0.00361699	0	0	0	0	0.022445	0	0.0026073	0.00685556	0.0756052	0.0731507	4.27544	0.00227273	0.000508647	0	0	0.000611995	0	0	0	0	0.00131752	0	0.000471921	0.00100503	0.00609756	0.011236	0.332046
GLYMA_03G242200	GLYMA_03G242200	0.126657	0.0413395	0.0599079	4.30259	0.0115738	0	0.104582	0.00606923	0.0133157	0	0.0551566	0.0145862	0.00720609	0.173733	0	0.045509	0.0181818	0.00457782	0.00653595	0.221854	0.00244798	0	0.0108254	0.000694927	0.00163132	0	0.00813008	0.000943841	0.00201005	0.0243902	0	0.00772201
GLYMA_05G133800	GLYMA_05G133800	0.0422785	0	0	0	0.0170718	0.0405604	0	0	0.011552	0	0.165968	0.103446	0.0433886	0.0427959	0.179967	4.30678	0.0030303	0	0	0	0.00428397	0.00639659	0	0	0.00108755	0	0.0162602	0.00802265	0.00904523	0.0121951	0.011236	0.301158
GLYMA_02G048700	GLYMA_02G048700	0.00856018	0	0	0	0.0859653	4.32555	0	0.00999283	0	0	0	0.0174731	0.0038819	0	0.0450519	0.0433821	0.000757576	0	0	0	0.00734394	0.339019	0	0.00138985	0	0	0	0.00188768	0.00100503	0	0.011236	0.003861
GLYMA_15G020700	GLYMA_15G020700	0	0	4.32692	0.0362282	0.0332988	0.0670467	0	0	0	0	0	0.0215274	0.0151205	0	0	0	0	0	0.503268	0.00331126	0.00428397	0.0127932	0	0	0	0	0	0.00330345	0.00201005	0	0	0
GLYMA_09G212800	GLYMA_09G212800	0.00736941	0	0	0	0.0153242	0	0	0	0.0028377	0	0	0.0199196	0	0	4.33747	0	0.000757576	0	0	0	0.00122399	0	0	0	0.00108755	0	0	0.00283152	0	0	0.258427	0
GLYMA_04G067100	GLYMA_04G067100	0	0	0	0	0.00415193	0	0.00228192	0	0	0	0	0.00911044	0	0	4.3554	0.0147592	0	0	0	0	0.000611995	0	0.00135318	0	0	0	0	0.000471921	0	0	0.258427	0.003861
GLYMA_19G255800	GLYMA_19G255800	0.00514975	0.0145122	0	0	0.00874077	0.0216907	0	0	0	0.0888225	0	0.0509752	0	4.38633	0	0.0284945	0.00151515	0.00254323	0	0	0.00183599	0.0021322	0	0	0	0.0158103	0	0.00519113	0	0.45122	0	0.003861
GLYMA_18G198300	GLYMA_18G198300	0.00362824	0.00243722	0	0.053065	0	0.0455151	0.0137518	0	0.00203204	0	0	0.0092117	0.00794646	4.40118	0	0.0128443	0.000757576	0.000508647	0	0.00331126	0	0.00426439	0.00135318	0	0.000543774	0	0	0.00188768	0.00301508	0.286585	0	0.003861
GLYMA_15G061700	GLYMA_15G061700	0.00515007	0.0168738	0	0	0.0749928	4.40186	0	0	0.00758666	0	0	0.0145447	0.00790847	0.00514345	0	0	0.000757576	0.00254323	0	0	0.00673195	0.33049	0	0	0.00108755	0	0	0.00188768	0.00201005	0.00609756	0	0
GLYMA_03G139700	GLYMA_03G139700	0.0600399	0.0518089	0	0	0.129314	0.0818875	0.0901813	0.119979	0.0764708	0.171071	4.40584	0.107577	0.148666	0.00813659	0.0561798	0.0407279	0.00984848	0.0111902	0	0	0.0195838	0.0191898	0.0175913	0.0236275	0.0141381	0.0197628	0.333333	0.0136857	0.0211055	0.00609756	0.011236	0.003861
GLYMA_13G324900	GLYMA_13G324900	0	0.0030949	0	0.0101045	0.0183447	0.00506099	0.00843366	0.00656211	0	0.0288659	0	0.0551925	0	4.41272	0	0	0	0.000508647	0	0.00331126	0.00183599	0.0021322	0.00270636	0.000694927	0	0.00395257	0	0.00707881	0	0.493902	0	0
GLYMA_17G131600	GLYMA_17G131600	0.0504074	0.011148	0	0	0.0731461	0	0.00839183	0.0369754	0.00697421	0.0299581	0.0183565	0.0672806	0.0445106	0.0485475	4.44339	0.198278	0.00757576	0.00203459	0	0	0.00979192	0	0.00270636	0.00903405	0.00108755	0.00263505	0.00813008	0.00802265	0.00703518	0.00609756	0.280899	0.030888
GLYMA_09G265800	GLYMA_09G265800	0	0	0	0	0	0	0	0.0214043	0.00122527	0	0	0.00801825	0	0	4.47154	0	0	0	0	0	0	0	0	0.000694927	0.000543774	0	0	0.00141576	0	0	0.202247	0
GLYMA_08G106400	GLYMA_08G106400	0.0257304	0.0116213	0.0660197	0	0.136209	4.49047	0	0.00494498	0	0.0217278	0.0982523	0.0364238	0.0122879	0	0.0450519	0	0.000757576	0.00152594	0.00653595	0	0.0152999	0.38806	0	0.00138985	0	0.00395257	0.0162602	0.00471921	0.00301508	0	0.011236	0
GLYMA_09G193500	GLYMA_09G193500	0.00846453	0.00919063	4.51077	0.013368	0.0150273	0	0	0.00102406	0	0.0299772	0	0.0131503	0	0	0	0	0.000757576	0.00101729	0.490196	0.00331126	0.00244798	0	0	0.000694927	0	0.00263505	0	0.000943841	0	0	0	0
GLYMA_10G016700	GLYMA_10G016700	0.00188241	0.00436426	4.54313	0.195988	0.0143007	0	0	0.015019	0.00355873	0	0	0	0	0	0	0	0.000757576	0.00152594	0.529412	0.0231788	0.00428397	0	0	0.00208478	0.000543774	0	0	0	0	0	0	0
GLYMA_07G174600	GLYMA_07G174600	0.0122852	0.0043437	0	0.0178408	0	0	0.0195546	0	0.00497506	0	0	0	0.0080402	0	4.5559	0	0.00227273	0.000508647	0	0.00331126	0	0	0.00135318	0	0.000543774	0	0	0	0.00100503	0	0.303371	0
GLYMA_20G020900	GLYMA_20G020900	0.0320562	0.00559664	0	0	0.00422941	0.0173658	0	0.0091938	0.00372193	0	0	0.00898333	0.0353468	0	0.151892	4.56185	0.0030303	0.00101729	0	0	0.000611995	0.00426439	0	0.00208478	0.000543774	0	0	0.00141576	0.00301508	0	0.0337079	0.382239
GLYMA_01G200400	GLYMA_01G200400	0.038232	0.00861807	0.0355209	0	0.00176063	0	0.0245875	0	0.00497506	0.0109429	4.57372	0.0113434	0.00869756	0	0	0	0.00378788	0.00203459	0.0130719	0	0.000611995	0	0.00270636	0	0.000543774	0.00131752	0.382114	0.000943841	0.00201005	0	0	0
GLYMA_15G110500	GLYMA_15G110500	0.0731124	0.00976237	4.57511	0	0.0270297	0	0.0062158	0	0	0	0	0.00241392	0	0	0	0	0.0030303	0.00152594	0.464052	0	0.00305998	0	0.00135318	0	0	0	0	0.000471921	0	0	0	0
GLYMA_15G089100	GLYMA_15G089100	0	0.00409869	4.58883	0	0.00603218	0	0	0.00506876	0	0	0	0.00304367	0.00296906	0	0	0	0	0.000508647	0.326797	0	0.00122399	0	0	0.000694927	0	0	0	0.000471921	0.00100503	0	0	0
GLYMA_11G169800	GLYMA_11G169800	0.0511953	0.00132357	0	0	0.010625	0	0.0106132	0.0111934	0.0262041	0.0144307	0	0.030655	0.0125338	4.60535	0	0	0.00454545	0.000508647	0	0	0.00122399	0	0.00135318	0.00208478	0.00108755	0.00131752	0	0.0023596	0.00201005	0.323171	0	0
GLYMA_08G325200	GLYMA_08G325200	0.00557041	0	0	0	0.0524224	4.62452	0	0.00411931	0	0.0452979	0.0722674	0.0170134	0.00390453	0	0	0	0.000757576	0	0	0	0.00856793	0.400853	0	0.000694927	0	0.00395257	0.00813008	0.00141576	0.00100503	0	0	0
GLYMA_04G227200	GLYMA_04G227200	0.0485283	0.0257697	0.0733552	0	0.151635	0.029787	0.0253057	0.0248987	0.0457381	4.62633	0.174278	0.134716	0.0450973	0.112663	0.102076	0	0.00530303	0.00305188	0.00653595	0	0.0116279	0.00426439	0.00270636	0.00347464	0.0021751	0.367589	0.0243902	0.00991034	0.00502513	0.0121951	0.0224719	0
GLYMA_06G046700	GLYMA_06G046700	0	0.0117164	4.6476	0	0.00897354	0	0	0	0	0.00902621	0	0.00304367	0	0	0	0	0	0.00152594	0.464052	0	0.000611995	0	0	0	0	0.00263505	0	0.000471921	0	0	0	0
GLYMA_05G130500	GLYMA_05G130500	0.0122387	0	0	0	0	0.0095743	0.00456384	0	0.00128914	0	0	0.00531442	0.017663	0	4.66517	0.0124669	0.000757576	0	0	0	0	0.0021322	0.00135318	0	0.00108755	0	0	0.000471921	0.00100503	0	0.337079	0.003861
GLYMA_10G193600	GLYMA_10G193600	0.0382661	0.00156218	0	0.0188247	0.0015769	0	0	0.0028048	0	0.0186481	4.70083	0.00459962	0.00449676	0.0040683	0	0	0.00378788	0.000508647	0	0.00331126	0.000611995	0	0	0.00138985	0	0.00395257	0.390244	0.000471921	0.00100503	0.00609756	0	0
GLYMA_10G154200	GLYMA_10G154200	0	0	0	0	0.0579774	4.76257	0.0099885	0.00177867	0	0	0	0.0117019	0.00359194	0.0283298	0	0.0143532	0	0	0	0	0.00611995	0.41791	0.00270636	0.000694927	0	0	0	0.00141576	0.00100503	0.0121951	0	0.003861
GLYMA_11G244200	GLYMA_11G244200	0	0	0.0386971	0	0	0	0	0	0.00522763	0.00664074	0	0.00109064	0.00193758	0	4.8215	0.0282857	0	0	0.00653595	0	0	0	0	0	0.00108755	0.00131752	0	0.000471921	0.00100503	0	0.280899	0.003861
GLYMA_09G240900	GLYMA_09G240900	0.0221003	0.00634564	0	0	0.0205107	0.00633075	0.0147405	0.0117646	0.015416	0	0.0301226	0	0.0332433	0	0	4.8673	0.00378788	0.00101729	0	0	0.00183599	0.0021322	0.00135318	0.00138985	0.00108755	0	0.00813008	0	0.00502513	0	0	0.324324
GLYMA_04G120400	GLYMA_04G120400	0	0.00335741	4.87334	0.0293571	0.0121161	0.0126016	0	0	0.00172135	0.00659751	0	0.00127134	0.00705776	0	0	0	0	0.000508647	0.562092	0.00662252	0.00183599	0.0021322	0	0	0.000543774	0.00131752	0	0.000471921	0.00100503	0	0	0
GLYMA_12G003200	GLYMA_12G003200	0.00500711	0.00616471	0	4.89599	0.103643	0.043546	0.00955471	0.00743076	0.00983354	0	0.081491	0.00496688	0	0	0.0732939	0	0.000757576	0.00101729	0	0.251656	0.0116279	0.00426439	0.00270636	0.00208478	0.0021751	0	0.00813008	0.000943841	0	0	0.011236	0
GLYMA_10G045500	GLYMA_10G045500	0	0.00188527	0	0.0541941	0.0503838	4.9299	0	0	0	0	0	0.0132434	0	0.00514345	0	0.0689465	0	0.000508647	0	0.00331126	0.00673195	0.405117	0	0	0	0	0	0.00141576	0	0.00609756	0	0.003861
GLYMA_20G233100	GLYMA_20G233100	0	0	0	0	0	0.0175201	0.00373497	0	0.00224144	0.0117209	0	0.011263	0	0	4.94635	0.0208365	0	0	0	0	0	0.0021322	0.00135318	0	0.000543774	0.00263505	0	0.000943841	0	0	0.258427	0.003861
GLYMA_03G214800	GLYMA_03G214800	0.0281372	0.0120562	0.189117	0	0.0414465	0.0570141	0.0311803	0.0923177	0	0.182795	4.95726	0.00634304	0.0505958	0.015049	0.144607	0	0.0030303	0.00305188	0.0392157	0	0.00673195	0.00639659	0.00405954	0.0208478	0	0.0250329	0.414634	0.00141576	0.00502513	0.0121951	0.011236	0
GLYMA_10G071000	GLYMA_10G071000	0.0357133	0.227414	0.102891	4.96726	0.0054262	0	0.0215631	0.00616617	0	0.0159348	0	0.0131014	0.00712279	0.150527	0	0.0290301	0.00378788	0.0213632	0.0326797	0.317881	0.00183599	0	0.00270636	0.000694927	0	0.00263505	0	0.00188768	0.00100503	0.0121951	0	0.003861
GLYMA_19G130600	GLYMA_19G130600	0.0333418	0.00209234	0	0	0	0	0.00867423	0	0.00175298	0.00790356	0	0	0	0	5.07675	0	0.00227273	0.000508647	0	0	0	0	0.00135318	0	0.000543774	0.00131752	0	0	0	0	0.280899	0
GLYMA_13G310700	GLYMA_13G310700	0.00805556	0.00629737	0.0448282	0.0333796	0.197649	5.08031	0.0271785	0.0175672	0.00271751	0.00901795	0	0.0544651	0.0218688	0.0094229	0.0450519	0.00554742	0.00151515	0.00101729	0.00653595	0.00331126	0.0263158	0.466951	0.00270636	0.00347464	0.000543774	0.00131752	0	0.00755073	0.0040201	0.00609756	0.011236	0.003861
GLYMA_05G039000	GLYMA_05G039000	0.0134205	0	0	0	0.00207175	0.021665	0.00605721	0.00658333	0	0	0	0.0473466	0.0127866	0.0257607	5.19046	0.19632	0.00227273	0	0	0	0.000611995	0.00426439	0.00135318	0.00138985	0	0	0	0.00424729	0.00100503	0.00609756	0.370787	0.027027
GLYMA_02G207100	GLYMA_02G207100	0.0134054	0.00383885	0	0	0.0057918	0	0.0146813	0.00977242	0.00237767	0.176687	5.20101	0.00620132	0	0.0218629	0	0	0.00151515	0.000508647	0	0	0.00122399	0	0.00270636	0.00138985	0.000543774	0.0131752	0.390244	0.000471921	0	0.00609756	0	0
GLYMA_03G077900	GLYMA_03G077900	0.0161463	0.00894473	0	0	0.0203152	0.00428841	0	0	0.00597721	0.00307473	0	0.0211328	0	5.24109	0	0	0.00151515	0.00152594	0	0	0.00183599	0.0021322	0	0	0.00108755	0.00131752	0	0.0023596	0	0.469512	0	0
GLYMA_15G086800	GLYMA_15G086800	0	0.00385631	0	0	0.00543996	0	0	0	0	0	0	0	0	0	5.24475	0.0753367	0	0.000508647	0	0	0.000611995	0	0	0	0	0	0	0	0	0	0.303371	0.003861
GLYMA_03G188300	GLYMA_03G188300	0	0.0112772	5.25997	0.0436406	0.012427	0	0	0	0	0	0	0.00398919	0.00432083	0	0	0.0739656	0	0.00305188	0.673203	0.00662252	0.00122399	0	0	0	0	0	0	0.000471921	0.00100503	0	0	0.003861
GLYMA_06G194500	GLYMA_06G194500	0.00196162	0	0	0	0	0	0	0	0.00476159	0	5.34153	0.0238486	0	0	0	0	0.000757576	0	0	0	0	0	0	0	0.000543774	0	0.333333	0.000943841	0	0	0	0
GLYMA_16G147900	GLYMA_16G147900	0.00250936	0	0	0	0	0	0.0124081	0	0.00139251	0	0	0.00801488	0	0	5.34777	0	0.000757576	0	0	0	0	0	0.00270636	0	0.000543774	0	0	0.000943841	0	0	0.280899	0
GLYMA_11G154100	GLYMA_11G154100	0.00537205	0.0182794	5.36206	0.0819188	0.0338214	0.0722992	0.00429445	0	0.00724844	0.00621766	0.108481	0.0202581	0	0.169237	0	0	0.00151515	0.00152594	0.437908	0.00662252	0.00305998	0.010661	0.00135318	0	0.00108755	0.00131752	0.0162602	0.00330345	0	0.0487805	0	0
GLYMA_04G190300	GLYMA_04G190300	0.012029	0.0031398	0.010246	0	0.00336631	0	0	0.00579044	0.0359164	0	0.125658	0.0322235	0.00747231	0.0676005	5.37543	0	0.00151515	0.000508647	0.00653595	0	0.000611995	0	0	0.00138985	0.00435019	0	0.00813008	0.0023596	0.00100503	0.00609756	0.337079	0
GLYMA_06G090200	GLYMA_06G090200	0.0904523	0	0	0.0298312	0.03134	0.0481066	0	0.0109334	0.0058961	0	0.0771355	0.215166	0.0431784	0.103524	0.0355793	5.39706	0.0113636	0	0	0.00331126	0.00305998	0.00426439	0	0.00208478	0.00163132	0	0.00813008	0.0160453	0.00703518	0.00609756	0.011236	0.351351
GLYMA_02G001500	GLYMA_02G001500	0.0745668	0.112219	0	0.0202091	0	0	0	0	0.00227902	0.00593212	5.4173	0.00168243	0	0.0203415	0	0	0.00909091	0.00508647	0	0.00331126	0	0	0	0	0.000543774	0.00131752	0.349593	0.000471921	0	0.00609756	0	0
GLYMA_09G085600	GLYMA_09G085600	0.00467639	0	0	0	0.00222949	0.0204822	0.00342288	0.0039195	0	0	0	0.00127408	0	0	5.46186	0.0829207	0.000757576	0	0	0	0.000611995	0.0021322	0.00135318	0.000694927	0	0	0	0.000471921	0	0	0.280899	0.00772201
GLYMA_07G186700	GLYMA_07G186700	0	0.0076764	0.120812	0.0315659	0.0883243	5.46359	0	0.0451321	0.0270602	0.0099586	0.0468593	0.0448281	0	0	0	0	0	0.00101729	0.00653595	0.00331126	0.00917993	0.454158	0	0.0076442	0.00543774	0.00131752	0.00813008	0.00707881	0	0	0	0
GLYMA_05G234100	GLYMA_05G234100	0.00477664	0.00657054	0	0	0	0	0	0	0	0	0	0	0.00763697	0	5.48034	0.0169046	0.000757576	0.00101729	0	0	0	0	0	0	0	0	0	0	0.00100503	0	0.393258	0.003861
GLYMA_19G158500	GLYMA_19G158500	0.00681273	0.0039369	0	0	0	0.00749717	0	0	0	0	5.51799	0	0	0	0	0	0.000757576	0.000508647	0	0	0	0.0021322	0	0	0	0	0.357724	0	0	0	0	0
GLYMA_16G166700	GLYMA_16G166700	0.00478612	0.00458457	0.0124637	0	0.0281589	0.0803251	0	0.00604036	0.020402	0	0.0427449	0.186284	0.0977619	0.0444753	5.52009	0	0.00227273	0.00152594	0.00653595	0	0.00122399	0.0127932	0	0.00208478	0.00326264	0	0.00813008	0.0184049	0.00703518	0.00609756	0.348315	0
GLYMA_16G144900	GLYMA_16G144900	0	0	0	0	0	0	0	0	0	0.0122333	5.53235	0.00486696	0	0.0218629	0	0.02475	0	0	0	0	0	0	0	0	0	0.00131752	0.333333	0.000943841	0	0.00609756	0	0.003861
GLYMA_10G257400	GLYMA_10G257400	0	0	5.5464	0	0	0	0	0	0	0.0365797	0	0.00964376	0	0	0	0	0	0	0.54902	0	0	0	0	0	0	0.00395257	0	0.00141576	0	0	0	0
GLYMA_03G210100	GLYMA_03G210100	0.0132443	0.0282106	0	0	0.0111408	0	0.0344423	0.00824454	0.00782004	0	0	0.0193073	0.0485212	0	0.0301636	5.54713	0.000757576	0.00305188	0	0	0.00122399	0	0.00541272	0.00138985	0.00108755	0	0	0.0023596	0.00603015	0	0.011236	0.332046
GLYMA_09G083400	GLYMA_09G083400	0	0	0	0.0853417	0	0	0	0	0	0	5.55718	0.00239068	0	0.0437258	0	0	0	0	0	0.00331126	0	0	0	0	0	0	0.341463	0.000471921	0	0.00609756	0	0
GLYMA_17G128700	GLYMA_17G128700	0.104607	0.0329292	0.0551515	0.00999474	0.034594	0	0.0231015	0.0323493	0.0117529	0.166651	5.56717	0.0133183	0.0282335	0.0040683	0.133285	0	0.00606061	0.00406918	0.0130719	0.00331126	0.00734394	0	0.00270636	0.00555942	0.00271887	0.0171278	0.357724	0.00141576	0.0040201	0.00609756	0.011236	0
GLYMA_01G148900	GLYMA_01G148900	0	0	0	0	0.00383696	0.0971061	0	0	0.00159138	0	0	0.00968607	0	0.0139192	5.59017	0	0	0	0	0	0.000611995	0.010661	0	0	0.000543774	0	0	0.000943841	0	0.0121951	0.337079	0
GLYMA_10G246800	GLYMA_10G246800	0.101325	0.0499315	0	0	0.00782356	0	0.0427926	0.00413401	0	0.21959	5.61865	0.00945798	0	0.0040683	0	0	0.00833333	0.00712106	0	0	0.00122399	0	0.0067659	0.000694927	0	0.0197628	0.471545	0.000943841	0	0.00609756	0	0
GLYMA_06G068600	GLYMA_06G068600	0.00686289	0	0.110591	0	0.00458041	0.00569041	0.0220013	0	0	0	0	0.00593065	0.00170141	0	5.65238	0.0220168	0.00151515	0	0.00653595	0	0.00122399	0.0021322	0.00405954	0	0	0	0	0.000943841	0.00100503	0	0.213483	0.00772201
GLYMA_04G088200	GLYMA_04G088200	0.0726702	0.00724568	0	0	0.0196729	0.0296696	0	0.00331391	0	0.0113568	0	0.190622	0.0368106	0.0749086	0.203309	5.65681	0.00757576	0.000508647	0	0	0.00305998	0.00426439	0	0.000694927	0	0.00263505	0	0.0146295	0.00603015	0.00609756	0.0337079	0.3861
GLYMA_05G138800	GLYMA_05G138800	0	0	0	0	0.00447365	0.0499885	0.00568802	0.001836	0	0.0196314	0	0	0.00910349	0	5.67929	0.0757053	0	0	0	0	0.000611995	0.00426439	0.00135318	0.000694927	0	0.00395257	0	0	0.00100503	0	0.404494	0.019305
GLYMA_10G185700	GLYMA_10G185700	0	0	0	0	0.00143123	0.1322	0.00372162	0	0.00846394	0.021271	0	0.0265	0.005743	0.0633842	5.68628	0	0	0	0	0	0.000611995	0.010661	0.00135318	0	0.00108755	0.00263505	0	0.00283152	0.00100503	0.00609756	0.325843	0
GLYMA_06G266900	GLYMA_06G266900	0.0115554	0.00803095	0	0	0	0	0	0	0.00406408	0	0	0.00899304	0	5.68779	0	0	0.00151515	0.00101729	0	0	0	0	0	0	0.000543774	0	0	0.00141576	0	0.439024	0	0
GLYMA_14G181800	GLYMA_14G181800	0.0188913	0.00208547	0.025541	0.0679998	0.161609	5.717	0.0185885	0.0077337	0.00385756	0	0	0.0485534	0.00988421	0	0	0.0929293	0.00227273	0.000508647	0.00653595	0.00662252	0.0183599	0.528785	0.00405954	0.00208478	0.00108755	0	0	0.00755073	0.00201005	0	0	0.011583
GLYMA_04G207700	GLYMA_04G207700	0.145785	0.141387	0	0.0979555	0.0759804	0.0629034	0.10285	0.111663	0.242613	0.0703091	0.0375871	0.205773	0.165232	5.73179	0.087033	0.0290308	0.0234848	0.0244151	0	0.013245	0.0104039	0.010661	0.0202977	0.0152884	0.0435019	0.0105402	0.00813008	0.0202926	0.0271357	0.365854	0.011236	0.00772201
GLYMA_01G082000	GLYMA_01G082000	0	0	0	0	0	0	0	0	0	0.00293697	0	0.0077752	0	5.75957	0	0.0506029	0	0	0	0	0	0	0	0	0	0.00131752	0	0.000943841	0	0.432927	0	0.003861
GLYMA_01G214800	GLYMA_01G214800	0.0321665	0.0920225	0	0.0573558	0.0708773	0.0801749	0.0183756	0.258889	0.0187184	0.0584322	0.154988	0.123446	0.171858	5.78133	0.0886116	0.0200363	0.00454545	0.0178026	0	0.00993377	0.00611995	0.00852878	0.00541272	0.04795	0.00271887	0.00922266	0.0243902	0.0136857	0.0251256	0.457317	0.011236	0.003861
GLYMA_12G134800	GLYMA_12G134800	0.0151515	0.00328583	0	0.0435692	0	0	0	0	0	0	0	0.00923819	0	0	5.81041	0.0586865	0.000757576	0.000508647	0	0.00331126	0	0	0	0	0	0	0	0.000943841	0	0	0.337079	0.00772201
GLYMA_06G168100	GLYMA_06G168100	0.0151625	0.00923967	0.136026	0	0.0199131	0	0.0493855	0	0.00759983	0.0115741	5.8233	0	0	0	0	0.0197091	0.00151515	0.00152594	0.0130719	0	0.00183599	0	0.00541272	0	0.00108755	0.00263505	0.414634	0	0	0	0	0.003861
GLYMA_04G197400	GLYMA_04G197400	0	0.00619597	0	0	0.010602	0	0	0	0.00476159	0	5.90403	0.00224617	0	0	0	0	0	0.00101729	0	0	0.00183599	0	0	0	0.000543774	0	0.422764	0.000471921	0	0	0	0
GLYMA_09G181200	GLYMA_09G181200	0.0534356	0.0106658	0	0	0.0756955	5.91155	0.0673089	0.0529964	0.0101649	0.0322266	0.0183565	0.0751921	0.0572347	0	0	0.0259128	0.00833333	0.00152594	0	0	0.0128519	0.38806	0.0175913	0.00833912	0.00163132	0.00527009	0.00813008	0.00991034	0.00904523	0	0	0.003861
GLYMA_02G272600	GLYMA_02G272600	0.0177223	0.00576044	0	0	0.00681833	0.0340606	0.00828647	0.00472177	0	0	0	0.0220374	0.0135811	0	5.93572	0.118549	0.00227273	0.000508647	0	0	0.00122399	0.0021322	0.00135318	0.00208478	0	0	0	0.00188768	0.00201005	0	0.202247	0.015444
GLYMA_18G272100	GLYMA_18G272100	0	0.00334856	0	0	0.00705877	0.0275787	0	0.0102061	0	0.0111844	0	0.0120501	0.0132884	5.96163	0	0	0	0.000508647	0	0	0.000611995	0.00426439	0	0.00138985	0	0.00131752	0	0.000943841	0.00201005	0.567073	0	0
GLYMA_03G091000	GLYMA_03G091000	0.00277399	0.00299371	0	0	0.00644484	0	0	0	0.00341566	0	0	0.0088874	0.0100704	0	5.98439	0.0195395	0.000757576	0.00101729	0	0	0.00122399	0	0	0	0.000543774	0	0	0.000471921	0.00100503	0	0.348315	0.003861
GLYMA_02G277600	GLYMA_02G277600	0	0.0124409	0	0	0.180311	5.9855	0	0.0105638	0.0174265	0	0	0.0228307	0.0226292	0.0102869	0	0.0424838	0	0.00152594	0	0	0.0152999	0.377399	0	0.00138985	0.0021751	0	0	0.0023596	0.0040201	0.00609756	0	0.00772201
GLYMA_13G186100	GLYMA_13G186100	0	0.00793521	6.07522	0	0.0101163	0	0.00672655	0	0	0	0.0976	0.00548745	0.00148453	0	0	0	0	0.000508647	0.588235	0	0.00122399	0	0.00270636	0	0	0	0.00813008	0.000471921	0.00100503	0	0	0
GLYMA_14G045400	GLYMA_14G045400	0.0136611	0.00189299	0	0	0	0	0.00114096	0	0.00600855	0.00424733	0	0.00412879	0	0	6.08657	0	0.00151515	0.000508647	0	0	0	0	0.00135318	0	0.000543774	0.00131752	0	0.000471921	0	0	0.224719	0
GLYMA_12G017000	GLYMA_12G017000	0.0130812	0.00633731	0	0	0.00577899	0	0	0	0.00231985	0.0848105	6.09853	0	0	0.0203415	0	0	0.00151515	0.00101729	0	0	0.000611995	0	0	0	0.000543774	0.00790514	0.471545	0	0	0.00609756	0	0
GLYMA_16G001600	GLYMA_16G001600	0	0	0.0256211	0	0.016418	0.00818453	0.0162903	0.00185597	0.00527768	0.022489	0.0976	0.00855249	0.00230141	6.11018	0	0.00749564	0	0	0.00653595	0	0.00305998	0.00426439	0.00405954	0.00138985	0.00108755	0.00527009	0.00813008	0.0023596	0.00100503	0.560976	0	0.003861
GLYMA_15G223800	GLYMA_15G223800	0.00580073	0.0160259	6.19705	0.0745643	0.012194	0	0.0141612	0.00777323	0	0.00845108	0	0.016515	0	0	0	0.0202359	0.000757576	0.00203459	0.647059	0.00662252	0.00244798	0	0.00270636	0.000694927	0	0.00131752	0	0.0023596	0	0	0	0.003861
GLYMA_12G116700	GLYMA_12G116700	0	0.00744286	0	0	0.130137	6.26652	0	0.00824273	0.025043	0.017567	0.0118325	0.0349042	0.0208136	0.0257173	0.210411	0	0	0.00101729	0	0	0.0128519	0.366738	0	0.00138985	0.00326264	0.00131752	0.00813008	0.00330345	0.00502513	0.00609756	0.011236	0
GLYMA_02G296800	GLYMA_02G296800	0.0666185	0.0393793	0	0.0298312	0.158315	6.27292	0.0389023	0.06469	0.0283315	0.0327761	0	0.0758969	0.0312173	0	0.0350357	0.105743	0.00984848	0.00457782	0	0.00331126	0.0189718	0.522388	0.00405954	0.00972898	0.00271887	0.00263505	0	0.00755073	0.00502513	0	0.011236	0.015444
GLYMA_09G102400	GLYMA_09G102400	0.097894	0	0	0	0.04108	0.0621093	0.0125305	0	0	0.00646796	0	0.0484308	0.0481607	0.0213799	0	6.36427	0.00378788	0	0	0	0.00183599	0.00426439	0.00270636	0	0	0.00131752	0	0.00519113	0.0080402	0.00609756	0	0.250965
GLYMA_06G290300	GLYMA_06G290300	0.0103001	0	0	0.0109355	0.124314	6.37675	0.004753	0.003865	0.00551124	0	0	0.00664677	0.019189	0.00514345	0	0	0.000757576	0	0	0.00331126	0.0140759	0.373134	0.00135318	0.000694927	0.00163132	0	0	0.000471921	0.00301508	0.00609756	0	0
GLYMA_17G081300	GLYMA_17G081300	0.0235452	0.0179595	6.40328	0.0261188	0.0130645	0.0297067	0.00770079	0.0076013	0.00759461	0	0	0.00152183	0.0106322	0	0	0.0122029	0.00378788	0.00457782	0.601307	0.00662252	0.00183599	0.00426439	0.00270636	0.00138985	0.000543774	0	0	0.000471921	0.00201005	0	0	0.003861
GLYMA_01G112600	GLYMA_01G112600	0	0.0121385	0.0108014	0	0.00621315	0	0	0.00632903	0.00145122	0.0123671	0	0.0108088	0	6.43247	0.0561798	0	0	0.00305188	0.00653595	0	0.000611995	0	0	0.000694927	0.000543774	0.00263505	0	0.00141576	0	0.481707	0.011236	0
GLYMA_08G178500	GLYMA_08G178500	0.0141529	0.00852737	0.015214	0	0.0138305	0.0137295	0	0.0159591	0.00848405	0.0511097	0	0.0116487	0.0235966	0	0.129474	6.4791	0.00227273	0.00101729	0.00653595	0	0.00183599	0.0021322	0	0.00347464	0.00108755	0.00263505	0	0.000943841	0.00301508	0	0.0224719	0.471042
GLYMA_08G315000	GLYMA_08G315000	0	0	0	0	0	0.0142052	0	0.00713477	0	0	0	0.00108788	0	0	6.4824	0	0	0	0	0	0	0.0021322	0	0.000694927	0	0	0	0.000471921	0	0	0.325843	0
GLYMA_01G214400	GLYMA_01G214400	0.00247331	0.0595421	6.49389	0.0274565	0.00360421	0	0	0	0.00240077	0	0	0.00427464	0.0116848	0	0	0.0202359	0.000757576	0.00813835	0.666667	0.00331126	0.000611995	0	0	0	0.000543774	0	0	0.000471921	0.00201005	0	0	0.003861
GLYMA_02G268100	GLYMA_02G268100	0	0.0127529	0	0	0.00324666	0	0	0	0	0	0	0	0	0	6.61678	0	0	0.00152594	0	0	0.000611995	0	0	0	0	0	0	0	0	0	0.280899	0
GLYMA_07G209300	GLYMA_07G209300	0.00265537	0.00410552	0	0.034618	0.179369	6.73566	0	0.032776	0.00852831	0.0116049	0.0511326	0.0891957	0.00839157	0.0677808	0.147104	0.0192857	0.000757576	0.00101729	0	0.00662252	0.0226438	0.5629	0	0.00555942	0.00163132	0.00263505	0.00813008	0.00943841	0.00201005	0.0121951	0.0224719	0.003861
GLYMA_02G135700	GLYMA_02G135700	0.0137443	0.00386804	0.015214	0	0.266303	6.76801	0.00317275	0.0114184	0.00144852	0.00592678	0.227382	0.0753935	0.020511	0.0795317	0.104181	0	0.00378788	0.000508647	0.00653595	0	0.0342717	0.575693	0.00135318	0.00208478	0.000543774	0.00131752	0.0325203	0.00991034	0.00201005	0.0121951	0.011236	0
GLYMA_07G096500	GLYMA_07G096500	0.00267884	0.00990781	0	0	0.0306188	6.78688	0.0238916	0.00406866	0.00512028	0	0	0.0164618	0	0	0	0.0447912	0.000757576	0.00101729	0	0	0.00367197	0.413646	0.00270636	0.000694927	0.000543774	0	0	0.00141576	0	0	0	0.003861
GLYMA_01G146000	GLYMA_01G146000	0.0140366	0.00518542	6.80818	0.0223432	0.00387316	0	0.00362686	0.00654974	0	0	0	0.00393575	0	0	0	0	0.00378788	0.00152594	0.568627	0.00331126	0.00122399	0	0.00135318	0.000694927	0	0	0	0.000943841	0	0	0	0
GLYMA_11G075100	GLYMA_11G075100	0.00826045	0.0265807	6.81061	0.0238392	0.0584685	0.0256141	0.00337957	0.0348723	0.0346514	0.0442202	0	0.0297529	0.059243	0.206383	0.0800852	0.0674731	0.00151515	0.00712106	0.633987	0.00331126	0.00856793	0.00426439	0.00135318	0.0111188	0.00706906	0.00658762	0	0.00330345	0.00904523	0.0182927	0.011236	0.011583
GLYMA_07G097100	GLYMA_07G097100	0.0246183	0.00313206	0	0	0	0	0	0.00243322	0	0.0227333	0	0.0030724	0.00147907	0	6.84721	0.0534345	0.00227273	0.000508647	0	0	0	0	0	0.000694927	0	0.00263505	0	0.000471921	0.00100503	0	0.314607	0.00772201
GLYMA_08G263200	GLYMA_08G263200	0.0486119	0.136897	0	0.059702	0.00625103	0.0272958	0.00948665	0.0649198	0.00936336	0.0395958	0.0916582	0.039366	0.0445674	6.99978	0	0.0347106	0.00606061	0.0233978	0	0.00993377	0.00122399	0.00426439	0.00270636	0.0138985	0.00108755	0.00790514	0.00813008	0.00566305	0.00703518	0.390244	0	0.00772201
GLYMA_18G215900	GLYMA_18G215900	0.0346591	0.110233	7.02098	0.0291228	0.223746	0.138161	0.180137	0.0502619	0.0564832	0.112662	0.201698	0.0970521	0.122759	0	0.0449798	0.106267	0.00757576	0.0152594	0.601307	0.00331126	0.0318237	0.0170576	0.0284168	0.0132036	0.0108755	0.0210804	0.0243902	0.0113261	0.0261307	0	0.011236	0.027027
GLYMA_02G241800	GLYMA_02G241800	0.124296	0.00621499	7.11345	0.260869	0.00352532	0.0310587	0.0197448	0.00465769	0	0	0	0.0283227	0	0	0	0	0.0106061	0.00152594	0.660131	0.0397351	0.000611995	0.00426439	0.00135318	0.000694927	0	0	0	0.00283152	0	0	0	0
GLYMA_13G242700	GLYMA_13G242700	0.0675049	0.112344	7.14633	0.174492	0.0314856	0	0.00499697	0.0356222	0.00967861	0	0	0.0121023	0.0068937	0.0621025	0	0	0.0113636	0.0188199	0.673203	0.0231788	0.00367197	0	0.00135318	0.00625434	0.00271887	0	0	0.00188768	0.00201005	0.0121951	0	0
GLYMA_04G153700	GLYMA_04G153700	0	0.00968135	0	0	0.00479996	0.0446985	0.0132665	0.00883853	0	0	0	0.0159953	0.00738762	7.15492	0	0	0	0.00152594	0	0	0.000611995	0.00639659	0.00135318	0.00138985	0	0	0	0.00141576	0.00201005	0.573171	0	0
GLYMA_16G209800	GLYMA_16G209800	0.0868912	0.16682	0.30466	0.357428	0.0988521	0.0834798	7.16515	0.0562569	0.34116	0.0854131	0	0.267583	0.0871771	0.109892	0.0350357	0.0594047	0.0121212	0.0249237	0.0326797	0.0496689	0.0140759	0.0149254	0.437077	0.00972898	0.050571	0.0131752	0	0.0217084	0.00904523	0.0182927	0.011236	0.00772201
GLYMA_06G076100	GLYMA_06G076100	0.0550708	0.0141585	0.015214	0.0566272	0.062918	0.173699	0.0374221	0.0169379	0.0171252	0.0534944	0	0.249077	0.207121	0.0378026	0.091154	7.17758	0.00530303	0.00152594	0.00653595	0.00662252	0.00734394	0.010661	0.00405954	0.00277971	0.0021751	0.00658762	0	0.0245399	0.0261307	0.00609756	0.0224719	0.432432
GLYMA_03G123600	GLYMA_03G123600	0.0128024	0.0258807	0	0	0.0924381	7.24883	0.011239	0.0209541	0.00431224	0.0206959	0	0.0483426	0.00747385	0.0370838	0	0	0.00151515	0.00254323	0	0	0.00795594	0.420043	0.00135318	0.00208478	0.000543774	0.00263505	0	0.00471921	0.00201005	0.0182927	0	0
GLYMA_11G147700	GLYMA_11G147700	0.0159143	0.00797652	0	7.25785	0.0224389	0	0	0	0.00460435	0	0	0.0215638	0	0.260933	0	0.0338091	0.00151515	0.00101729	0	0.248344	0.00428397	0	0	0	0.000543774	0	0	0.00283152	0	0.0121951	0	0.003861
GLYMA_19G127200	GLYMA_19G127200	0.00598401	0.00549302	0	0	0.173534	7.28586	0	0.016509	0	0.00462939	0	0.0120978	0.0046965	0.0650998	0	0	0.000757576	0.00101729	0	0	0.0183599	0.443497	0	0.00277971	0	0.00131752	0	0.00141576	0.00201005	0.0121951	0	0
GLYMA_16G053300	GLYMA_16G053300	0.171382	0.0815789	0.0330767	0.083407	0.00168408	0	0.0440132	0.01527	0.00855375	0.113329	7.45837	0.0181416	0.0078579	0.0748495	0	0.00554742	0.0128788	0.0132248	0.00653595	0.00331126	0.000611995	0	0.00541272	0.00277971	0.000543774	0.0131752	0.569106	0.0023596	0.00100503	0.0121951	0	0.003861
GLYMA_15G157100	GLYMA_15G157100	0.0280321	0.00910791	0	0	0	0.009027	0	0.00232262	0	0	0	0.00205272	0.0132066	7.47357	0	0.0159876	0.0030303	0.00101729	0	0	0	0.00426439	0	0.000694927	0	0	0	0.000471921	0.00100503	0.530488	0	0.003861
GLYMA_12G174700	GLYMA_12G174700	0.00457397	0.0215568	0	0	0.00160292	0	0	0.00396572	0.00290245	0.0122333	0	0.0509643	0.00245607	7.56568	0	0	0.00151515	0.00305188	0	0	0.000611995	0	0	0.000694927	0.000543774	0.00131752	0	0.00377537	0.00100503	0.567073	0	0
GLYMA_19G136100	GLYMA_19G136100	0.0674024	0.0863481	0	0	0.00695054	0	0.0396647	0.00960351	0.00352871	0.307892	7.59027	0.00671619	0.0138339	0.0284781	0	0	0.00757576	0.0122075	0	0	0.000611995	0	0.00541272	0.00277971	0.000543774	0.030303	0.504065	0.00141576	0.00301508	0.00609756	0	0
GLYMA_15G274300	GLYMA_15G274300	0.028702	0.0210295	0	0	0.0362769	0.10805	0.012357	0.0190114	0.00154044	0.00973779	0	0.023532	0.0401924	0.0946298	0.0731507	7.59626	0.00227273	0.00254323	0	0	0.00244798	0.0021322	0.00270636	0.00416956	0.000543774	0.00131752	0	0.00283152	0.00502513	0.0121951	0.011236	0.42471
GLYMA_13G087100	GLYMA_13G087100	0.0348896	0.013035	0	0	0.00225828	0	0.0329691	0.00153915	0.0157153	0.00293697	0	0.0396772	0.0668174	0.0360163	0.0355793	7.59797	0.00530303	0.00254323	0	0	0.000611995	0	0.00270636	0.000694927	0.00163132	0.00131752	0	0.00377537	0.00703518	0.00609756	0.011236	0.405405
GLYMA_06G175200	GLYMA_06G175200	0.00259816	0	0	0	0.00990283	0	0.0264293	0	0	0	0	0	0.00714304	0	7.6957	0.0169046	0.00151515	0	0	0	0.000611995	0	0.00135318	0	0	0	0	0	0.00100503	0	0.382022	0.003861
GLYMA_16G123800	GLYMA_16G123800	0.0187566	0.0110927	0	0	0.0207736	0.0262304	0.00704414	0.00185018	0.00888452	0.0149604	0.207802	0.0198065	0.0100238	7.89709	0	0.0712129	0.00227273	0.00203459	0	0	0.00244798	0.00426439	0.00135318	0.000694927	0.00163132	0.00263505	0.0162602	0.00141576	0.00201005	0.5	0	0.00772201
GLYMA_20G062900	GLYMA_20G062900	0.00505051	0.00385631	0	0	0.0089044	0.0215809	0	0	0	0.0069453	0.0784757	0.00594359	0.0126847	0	8.03019	0	0.000757576	0.000508647	0	0	0.00122399	0.0021322	0	0	0	0.00131752	0.00813008	0.000471921	0.00201005	0	0.438202	0
GLYMA_03G226100	GLYMA_03G226100	0.00313956	0.000881537	0	0	0.00748078	0.0303474	0.0245767	0	0.0132656	0.0023406	0	0.0135096	0	0	8.06417	0.0147592	0.000757576	0.000508647	0	0	0.00244798	0.00639659	0.00405954	0	0.00326264	0.00131752	0	0.000943841	0	0	0.41573	0.003861
GLYMA_04G064800	GLYMA_04G064800	0.0228133	0.0408205	0	0.163905	0.026548	0.0508097	0.0256715	0.0682891	0.320657	0.106728	8.38515	0.0298972	0.0846709	0.0819166	0	0.0199123	0.00378788	0.00813835	0	0.00993377	0.00367197	0.00639659	0.00270636	0.0138985	0.0478521	0.0118577	0.414634	0.00283152	0.0130653	0.0182927	0	0.003861
GLYMA_09G167000	GLYMA_09G167000	0.017879	0	0	0	0.0157702	0	0.00880133	0	0.0012195	0.00753732	0	0	0	0	8.40141	0.0266374	0.00151515	0	0	0	0.00122399	0	0.00270636	0	0.000543774	0.00131752	0	0	0	0	0.213483	0.00772201
GLYMA_14G186600	GLYMA_14G186600	0.0150694	0.00113487	0.0221664	0.0231072	0	0	0.00228192	0.0103156	0.00260553	0	0	0.00478981	0	0	8.42703	0.14033	0.00227273	0.000508647	0.0130719	0.00331126	0	0	0.00135318	0.00208478	0.000543774	0	0	0.000943841	0	0	0.393258	0.00772201
GLYMA_12G018900	GLYMA_12G018900	0.00606546	0.00644052	0	0.0480589	0.240314	8.46383	0	0.0186722	0	0	0	0.0436627	0.0305681	0	0	0	0.000757576	0.00101729	0	0.00331126	0.0281518	0.481876	0	0.00208478	0	0	0	0.00283152	0.0040201	0	0	0
GLYMA_15G124500	GLYMA_15G124500	0.0168616	0.00867588	0	0.0189975	0.00933902	0.0444679	0	0.00671319	0	0	0	0.00745996	0.0109242	0	8.54023	0.119695	0.00151515	0.00152594	0	0.00331126	0.00244798	0.00426439	0	0.00277971	0	0	0	0.000943841	0.00100503	0	0.41573	0.019305
GLYMA_10G147900	GLYMA_10G147900	0	0.00377615	0	0	0.00796869	0	0	0.00604284	0	0.0150919	8.63038	0.0272343	0.0101415	0	0	0	0	0.000508647	0	0	0.000611995	0	0	0.000694927	0	0.00131752	0.471545	0.00188768	0.00100503	0	0	0
GLYMA_16G031400	GLYMA_16G031400	0	0.00545092	0	0	0.0123837	0	0	0	0	0	8.74715	0.0182437	0	0.0122049	0	0	0	0.00101729	0	0	0.00122399	0	0	0	0	0	0.430894	0.00141576	0	0.00609756	0	0
GLYMA_10G185500	GLYMA_10G185500	0.0174515	0.00217743	0	0	0.00428418	0.0335251	0	0	0	0.03403	0	0.0203341	0.0132209	0	8.79375	0.00635034	0.00227273	0.000508647	0	0	0.000611995	0.0021322	0	0	0	0.00922266	0	0.00330345	0.00201005	0	0.426966	0.003861
GLYMA_07G133400	GLYMA_07G133400	0.0047201	0.00225965	0	0	0	0	0	0	0.0030687	0	0.0753483	0	0.00809851	0	8.9639	0.0124669	0.000757576	0.000508647	0	0	0	0	0	0	0.000543774	0	0.00813008	0	0.00100503	0	0.314607	0.003861
GLYMA_14G049400	GLYMA_14G049400	0	0	0	0	0.00204339	0.0474153	0.00566896	0.00286214	0	0	0	0.00191138	0.00763697	0	8.9912	0	0	0	0	0	0.000611995	0.00639659	0.00135318	0.000694927	0	0	0	0.000471921	0.00100503	0	0.348315	0
GLYMA_19G201500	GLYMA_19G201500	0.0357596	0.0251787	0.0280793	0.0175214	0.140674	0.0140376	0.00748854	0.0400701	0.00404246	0.0447772	0.344017	0.134169	0.0447628	9.04454	0	0.109747	0.00530303	0.00457782	0.0130719	0.00662252	0.0232558	0.00426439	0.00135318	0.00972898	0.00108755	0.00658762	0.0325203	0.0151015	0.00502513	0.54878	0	0.011583
GLYMA_05G215500	GLYMA_05G215500	0.00856018	0.0208466	0	0	0.114114	9.11056	0.0106132	0.0189858	0	0.0150919	0	0.0333791	0.00532219	0.0449157	0	0	0.000757576	0.00254323	0	0	0.0110159	0.501066	0.00135318	0.00347464	0	0.00131752	0	0.00424729	0.00201005	0.0121951	0	0
GLYMA_13G334500	GLYMA_13G334500	0.0611431	0.149717	0	0	0.0503008	0.0337094	0.0999229	0.176546	0.185347	0.428851	0.131703	0.141877	0.00500261	9.14421	0.119025	0.0124669	0.00833333	0.0239064	0	0	0.00673195	0.00852878	0.0121786	0.0291869	0.0320827	0.0513834	0.0243902	0.0136857	0.00100503	0.518293	0.011236	0.003861
GLYMA_07G069700	GLYMA_07G069700	0.0779441	0.0300135	0.0269635	0.0138199	0.0365453	0.0105008	0.0126237	0.00399383	0	0.437167	9.16044	0.0259637	0	0.0162732	0	0.00814902	0.00757576	0.00254323	0.00653595	0.00331126	0.00367197	0.0021322	0.00270636	0.000694927	0	0.0434783	0.504065	0.00424729	0	0.00609756	0	0.003861
GLYMA_13G224800	GLYMA_13G224800	0	0	0	0	0	0.0125276	0	0	0	0.00488152	0	0.0046086	0	0	9.22471	0.0331987	0	0	0	0	0	0.0021322	0	0	0	0.00131752	0	0.000471921	0	0	0.41573	0.003861
GLYMA_09G265700	GLYMA_09G265700	0	0.00543271	0	0	0.014541	0.0277677	0.00456384	0.00713477	0.001384	0	0	0.0213454	0.0237578	0.0730769	9.28437	0.0350331	0	0.00152594	0	0	0.00183599	0.00426439	0.00135318	0.000694927	0.000543774	0	0	0.00424729	0.00201005	0.0121951	0.539326	0.00772201
GLYMA_14G204500	GLYMA_14G204500	0.00227091	0	0	0	0.00271998	0	0.00228192	0	0.00367167	0	0	0.0013987	0	0	9.28599	0.0313266	0.000757576	0	0	0	0.000611995	0	0.00135318	0	0.000543774	0	0	0.000471921	0	0	0.41573	0.003861
GLYMA_10G028100	GLYMA_10G028100	0.164209	0.0256288	0	0.0128743	0.012168	0.0143679	0.0540762	0.016952	0.00563624	0.0143719	9.29709	0.0168939	0.00389243	0.0136269	0	0.0494367	0.00757576	0.00305188	0	0.00331126	0.00122399	0.0021322	0.00541272	0.00277971	0.00108755	0.00263505	0.463415	0.00188768	0.00100503	0.0121951	0	0.003861
GLYMA_04G168500	GLYMA_04G168500	0.00524274	0.00114251	0	0	0.0160262	0	0	0	0	0.0498642	9.46141	0	0.00540918	0.00813659	0.133285	0	0.000757576	0.000508647	0	0	0.00122399	0	0	0	0	0.00527009	0.512195	0	0.00100503	0.00609756	0.011236	0
GLYMA_02G205800	GLYMA_02G205800	0.0043614	0.0139036	0	0.0437761	0.0383622	0.0281724	0	0	0.00570311	0.00699694	0	0.0453133	0.0078579	9.46347	0	0	0.000757576	0.00305188	0	0.00662252	0.00367197	0.00426439	0	0	0.00108755	0.00131752	0	0.00330345	0.00100503	0.47561	0	0
GLYMA_10G179400	GLYMA_10G179400	0.0652581	0.0777238	0.0339152	0	0.0305564	0.00227701	0.0247784	0.0157463	0	0.00262089	9.48488	0.014216	0	0	0	0	0.00833333	0.00813835	0.0196078	0	0.00367197	0.0021322	0.00405954	0.00347464	0	0.00131752	0.585366	0.00141576	0	0	0	0
GLYMA_16G067700	GLYMA_16G067700	0.0116557	0.00118621	0	0	0.00374536	0	0	0.0046417	0	0.0082811	0.0183565	0.0318293	0.00560215	0	9.82199	0	0.00151515	0.000508647	0	0	0.00122399	0	0	0.00138985	0	0.00131752	0.00813008	0.00377537	0.00100503	0	0.382022	0
GLYMA_02G145700	GLYMA_02G145700	0.00316184	0.0122955	0.0384694	0	0	0	0.0170019	0.00957456	0.00546506	0.0186942	9.98104	0.0074553	0	0	0	0	0.000757576	0.00152594	0.00653595	0	0	0	0.00270636	0.00138985	0.000543774	0.00263505	0.430894	0.000471921	0	0	0	0
GLYMA_16G080400	GLYMA_16G080400	0	0.00377615	0.0304281	0	0	0.0104725	0	0	0.0175091	0.0380638	10.1195	0.00239068	0	0.00813659	0	0	0	0.000508647	0.00653595	0	0	0.0021322	0	0	0.00108755	0.00263505	0.569106	0.000471921	0	0.00609756	0	0
GLYMA_09G006000	GLYMA_09G006000	0	0.0364875	10.56	0.0074427	0.00855937	0	0	0	0	0	0	0.00364136	0	0	0	0	0	0.00610376	0.79085	0.00331126	0.000611995	0	0	0	0	0	0	0.000471921	0	0	0	0
GLYMA_15G220800	GLYMA_15G220800	0.00505051	0	0	0	0.00772721	0	0	0	0	0	0	0.0119546	0.0100503	0	10.613	0.147241	0.000757576	0	0	0	0.000611995	0	0	0	0	0	0	0.00188768	0.00100503	0	0.47191	0.011583
GLYMA_05G011900	GLYMA_05G011900	0.0679857	0.00476261	0	0	0.0380828	0.164825	0.0200937	0.00267485	0	0.0441936	10.6312	0.287745	0.0117352	0.106951	0.184111	0.153176	0.00681818	0.000508647	0	0	0.00489596	0.0234542	0.00270636	0.000694927	0	0.00790514	0.373984	0.029731	0.00301508	0.0243902	0.0224719	0.015444
GLYMA_02G016200	GLYMA_02G016200	0.00568324	0.0215201	10.9867	0.119423	0.0213052	0	0	0	0	0	0	0.0046864	0	0	0	0	0.000757576	0.00406918	0.72549	0.0165563	0.00367197	0	0	0	0	0	0	0.000471921	0	0	0	0
GLYMA_02G056400	GLYMA_02G056400	0.0223941	0.0748579	0	0.10613	0.0668142	0	0.0111649	0.017621	0.0444656	0.457873	11.1755	0.022567	0.0254325	0.0191173	0	0	0.00378788	0.00813835	0	0.00331126	0.00367197	0	0.00135318	0.00208478	0.00543774	0.0671937	0.544715	0.00141576	0.0040201	0.0121951	0	0
GLYMA_16G080500	GLYMA_16G080500	0.00999664	0.00303059	0.0580457	0	0.016903	0.020581	0	0	0	0	11.1914	0	0	0.0244098	0	0	0.00151515	0.00101729	0.00653595	0	0.00122399	0.0021322	0	0	0	0	0.674797	0	0	0.00609756	0	0
GLYMA_08G162700	GLYMA_08G162700	0.0174806	0.0395765	11.2832	0.0798414	0.0278308	0	0.0169004	0	0	0	0	0.00830846	0.00705776	0	0	0	0.00378788	0.00559512	0.79085	0.00993377	0.00489596	0	0.00270636	0	0	0	0	0.000471921	0.00100503	0	0	0
GLYMA_02G030500	GLYMA_02G030500	0.00666762	0.00521234	0	0.0140367	0.0148846	0.0225569	0.0203498	0	0.006098	0	0	0	0.00281756	0	11.3568	0.0124669	0.00151515	0.00101729	0	0.00331126	0.00244798	0.00852878	0.00270636	0	0.00108755	0	0	0	0.00100503	0	0.505618	0.003861
GLYMA_11G078400	GLYMA_11G078400	0.0480145	0.00156218	0	0	0.0287078	0	0.00555303	0.0113196	0	0.0225603	0	0.0107494	0.0149557	0	11.4227	0.0760247	0.00530303	0.000508647	0	0	0.00183599	0	0.00270636	0.00138985	0	0.00131752	0	0.00188768	0.00100503	0	0.449438	0.015444
GLYMA_01G229600	GLYMA_01G229600	0.0182644	0.0215601	0.0947239	0	0.364463	11.4377	0.0138263	0.00425552	0.00309843	0.0475464	0	0.122521	0.033313	0.0337249	0.0450519	0.0982274	0.00151515	0.00101729	0.00653595	0	0.0348837	0.471215	0.00270636	0.000694927	0.000543774	0.00790514	0	0.011798	0.00703518	0.0121951	0.011236	0.011583
GLYMA_10G000400	GLYMA_10G000400	0.0195923	0.0256475	0	0	0.015504	0.0664402	0.0404773	0.0334136	0.0121184	0.00746049	0	0.0537073	0.0164712	0.0519873	11.4654	0.0383761	0.00454545	0.00457782	0	0	0.00244798	0.00639659	0.00541272	0.00555942	0.00163132	0.00131752	0	0.00707881	0.00301508	0.0121951	0.505618	0.011583
GLYMA_18G059600	GLYMA_18G059600	0.0223817	0.00235497	0	0	0.0244847	0.0226934	0	0.00465769	0.00338168	0.0117479	0	0.0289595	0.0319313	11.545	0.112023	0	0.00378788	0.00101729	0	0	0.00367197	0.00639659	0	0.000694927	0.000543774	0.00131752	0	0.0023596	0.0040201	0.530488	0.011236	0
GLYMA_01G145200	GLYMA_01G145200	0.0631159	0.0259641	0.0304281	0	0.0223179	0.0254474	0	0.0319171	0.0156283	0.026821	0.0150613	0.0600515	0.493888	0.0659196	0.403882	11.5804	0.00909091	0.00305188	0.00653595	0	0.00244798	0.00426439	0	0.00555942	0.0021751	0.00395257	0.00813008	0.00755073	0.0592965	0.00609756	0.0449438	0.594595
GLYMA_15G274200	GLYMA_15G274200	0.0522946	0.0200602	0.0978435	0.0271192	0.0519923	0	0	0.00607188	0.000667453	0	0.234629	0.0594305	0.0309623	0.0756052	0.198703	11.6768	0.00530303	0.00203459	0.00653595	0.00331126	0.00367197	0	0	0.000694927	0.000543774	0	0.0162602	0.00519113	0.0040201	0.00609756	0.0224719	0.513514
GLYMA_18G014000	GLYMA_18G014000	0.10843	0.0121009	0	0.0235509	0.0308485	0	0.00835004	0	0	0.00544881	0	0.0218554	0.0422	0	0	11.8548	0.0030303	0.00152594	0	0.00331126	0.00122399	0	0.00270636	0	0	0.00131752	0	0.000943841	0.00502513	0	0	0.23166
GLYMA_10G028200	GLYMA_10G028200	0.032361	0.00632947	0	0	0.0146707	0.00945542	0.0106132	0	0	0.0398861	12.0563	0	0	0.0313221	0	0	0.0030303	0.00152594	0	0	0.00183599	0.0021322	0.00135318	0	0	0.00658762	0.617886	0	0	0.0121951	0	0
GLYMA_15G276000	GLYMA_15G276000	0.0208382	0.0169402	0	0.0678337	0.503513	12.3533	0.0142037	0.00948167	0.0105722	0.0263365	0	0.109171	0.0257701	0.0247768	0.382773	0.117999	0.00151515	0.00203459	0	0.00662252	0.0403917	0.678038	0.00270636	0.00208478	0.00108755	0.00395257	0	0.0103823	0.0040201	0.00609756	0.0449438	0.011583
GLYMA_16G100800	GLYMA_16G100800	0.0126997	0.00627613	0	0	0	0.0466156	0.00114096	0.00216556	0	0.00479448	0	0	0	0	12.5738	0.011098	0.00151515	0.00101729	0	0	0	0.0021322	0.00135318	0.000694927	0	0.00131752	0	0	0	0	0.573034	0.003861
GLYMA_02G268300	GLYMA_02G268300	0	0	0	0	0	0	0	0	0.00691824	0	0	0	0	0	12.7746	0	0	0	0	0	0	0	0	0	0.000543774	0	0	0	0	0	0.292135	0
GLYMA_10G000500	GLYMA_10G000500	0.020202	0.00512852	0	0	0.00967912	0.0360168	0	0.0229854	0	0.00746049	0	0.00426398	0.0169553	0	12.7763	0.0073445	0.000757576	0.00101729	0	0	0.00183599	0.0021322	0	0.00138985	0	0.00131752	0	0.000943841	0.00301508	0	0.606742	0.003861
GLYMA_15G155700	GLYMA_15G155700	0	0.0260072	12.8906	0.212542	0.0111871	0	0.0091928	0	0	0	0.0435229	0.00241392	0.0106696	0	0	0	0	0.00356053	0.797386	0.0198675	0.00183599	0	0.00135318	0	0	0	0.00813008	0.000471921	0.00201005	0	0	0
GLYMA_14G159300	GLYMA_14G159300	0.03333	0.023576	0	0	0.0167877	0.00597924	0	0	0.0118554	0.0060117	0	0.0846812	0.028109	12.9018	0	0	0.00378788	0.00305188	0	0	0.00183599	0.0021322	0	0	0.00163132	0.00263505	0	0.00849457	0.00301508	0.621951	0	0
GLYMA_02G145800	GLYMA_02G145800	0.0354798	0.0344545	0	0	0.0225356	0.0323186	0.0468952	0.032442	0.0163373	0.0538678	13.1183	0.0594545	0.0726247	0.0258318	0.121865	0.0688421	0.00454545	0.00610376	0	0	0.00428397	0.00852878	0.00270636	0.00903405	0.00271887	0.00790514	0.609756	0.00707881	0.0140704	0.0121951	0.011236	0.011583
GLYMA_13G271800	GLYMA_13G271800	0.0158945	0.00677187	0	0	0.0209097	0.0188738	0	0	0.00861945	0.00866791	0	0.02416	0	13.6323	0	0.0143532	0.00227273	0.00101729	0	0	0.00183599	0.0021322	0	0	0.00108755	0.00131752	0	0.0023596	0	0.585366	0	0.003861
GLYMA_12G047400	GLYMA_12G047400	0.00729477	0.0396666	0	0	0.0132539	0	0.0112873	0.00531364	0.0134514	0.101498	13.7396	0.00785371	0	0.0941389	0	0.0412337	0.00227273	0.00661241	0	0	0.00244798	0	0.00270636	0.00138985	0.0021751	0.00922266	0.593496	0.000943841	0	0.0121951	0	0.00772201
GLYMA_07G006500	GLYMA_07G006500	0.0550153	0.0430394	0	0.0236636	0.0201386	0.0543498	0.0329349	0	0.00652673	0.0175149	0.0448928	0.428796	0.0447	0.175711	0.142317	13.7616	0.00606061	0.00457782	0	0.00662252	0.00305998	0.00639659	0.00405954	0	0.00163132	0.00263505	0.00813008	0.0287872	0.00603015	0.0243902	0.011236	0.420849
GLYMA_19G155600	GLYMA_19G155600	0.038519	0.0327111	0.0678707	0.0848072	0.00567016	0	0.0767874	0.0199655	0	0.212328	13.7893	0.0248442	0.0344267	0.204018	0.0868983	0.252153	0.00454545	0.00406918	0.00653595	0.013245	0.00122399	0	0.00811908	0.00208478	0	0.0158103	0.536585	0.00424729	0.0080402	0.054878	0.011236	0.042471
GLYMA_10G185600	GLYMA_10G185600	0	0	0	0	0.00883684	0.110163	0.0119539	0.00986452	0	0	0	0.0304511	0	0.190153	13.8908	0	0	0	0	0	0.00183599	0.0191898	0.00135318	0.00138985	0	0	0	0.00377537	0	0.00609756	0.460674	0
GLYMA_10G016600	GLYMA_10G016600	0.00880697	0.0131561	14.464	0.218858	0.0884788	0	0.00277518	0.00501789	0	0.0209131	0.0834461	0.00909947	0	0.073642	0	0.0608032	0.00151515	0.00203459	0.803922	0.0231788	0.00917993	0	0.00135318	0.00138985	0	0.00131752	0.0162602	0.000943841	0	0.00609756	0	0.003861
GLYMA_13G191100	GLYMA_13G191100	0	0	0	0	0.0119065	0.0613399	0	0.00292355	0	0.0141365	0	0.0537394	0.016541	0	14.4683	0	0	0	0	0	0.000611995	0.00852878	0	0.000694927	0	0.00131752	0	0.00566305	0.00201005	0	0.606742	0
GLYMA_03G236200	GLYMA_03G236200	0.0435141	0.00981472	0.15214	0	0.00289633	0.0215446	0.029481	0.0103685	0.011061	0.0387786	0.0150613	0.0514258	0.0943316	0.295584	0.402616	15.2905	0.00530303	0.00101729	0.00653595	0	0.000611995	0.0021322	0.00135318	0.00138985	0.00108755	0.00658762	0.00813008	0.00471921	0.0080402	0.0243902	0.0224719	0.610039
GLYMA_04G063800	GLYMA_04G063800	0.0153021	0.0165207	0	0	0.0288514	0.0269557	0.00747613	0.00239795	0	0.0246	0.0362626	0.064221	0	16.529	0	0	0.00151515	0.00152594	0	0	0.00305998	0.0021322	0.00135318	0.000694927	0	0.00527009	0.00813008	0.00424729	0	0.707317	0	0
GLYMA_01G164600	GLYMA_01G164600	0.0123973	0	0	0	0.0118334	0.0115254	0.00228192	0	0	0	0	0.00923164	0	0	16.8781	0.0156633	0.00227273	0	0	0	0.00122399	0.0021322	0.00135318	0	0	0	0	0.00141576	0	0	0.426966	0.003861
GLYMA_18G100300	GLYMA_18G100300	0.00352525	0	0	0	0.0067924	0	0.00309652	0	0	0.00583491	0	0.0217402	0.00545913	0	16.8919	0.439359	0.000757576	0	0	0	0.000611995	0	0.00135318	0	0	0.00131752	0	0.0023596	0.00100503	0	0.550562	0.046332
GLYMA_12G233300	GLYMA_12G233300	0.116678	0.410842	0.723895	16.926	0.653079	0.346638	0.0418857	0.243162	0.0158833	0.11572	0.195317	0.17202	0.0251473	0.11596	0	0.010217	0.0166667	0.051882	0.130719	0.496689	0.0581395	0.0447761	0.00405954	0.0326616	0.00163132	0.0105402	0.0243902	0.017933	0.00301508	0.0121951	0	0.003861
GLYMA_06G318000	GLYMA_06G318000	0.0757805	0.00981828	17.738	0.0723727	0.0135967	0.0216907	0.0134716	0	0.0111224	0	0	0	0.0115751	0	0.0667615	0.0591272	0.0030303	0.00101729	0.79085	0.013245	0.00122399	0.0021322	0.00270636	0	0.00108755	0	0	0	0.00201005	0	0.011236	0.003861
GLYMA_16G074200	GLYMA_16G074200	0.585595	0.0398786	0.0587628	0.013368	0.0999099	0.723247	0.0285865	0.0292405	0.0146796	0.100197	0	0.698413	0.265488	0	17.9235	0.0963438	0.0484848	0.00559512	0.0196078	0.00331126	0.00979192	0.0554371	0.0067659	0.00416956	0.00163132	0.00922266	0	0.0320906	0.0221106	0	0.449438	0.019305
GLYMA_06G010500	GLYMA_06G010500	0.0104349	0.0118146	18.0421	0.548042	0.0410545	0.0216907	0	0.0132004	0.00772406	0.018653	0	0.0442343	0.0132471	0.067826	0	0	0.00227273	0.00254323	0.823529	0.0331126	0.00734394	0.0021322	0	0.00277971	0.000543774	0.00131752	0	0.00471921	0.00201005	0.00609756	0	0
GLYMA_07G130800	GLYMA_07G130800	0.038838	0.125393	18.0938	0.430786	0.147352	0.0131943	0.0114871	0.0571444	0.00207865	0.120452	0.0535578	0.0172272	0.0229636	0	0	0	0.00454545	0.017294	0.915033	0.0331126	0.0214198	0.0021322	0.00135318	0.0104239	0.000543774	0.00922266	0.00813008	0.00188768	0.0040201	0	0	0
GLYMA_09G051100	GLYMA_09G051100	0.0533495	0.0101604	0	0.0252575	0.0135505	0.0229111	0	0.0106516	0.00249095	0.0203193	0	0.0727119	0.00344423	18.341	0	0.0776335	0.00378788	0.00152594	0	0.00331126	0.00183599	0.00426439	0	0.00208478	0.000543774	0.00263505	0	0.00660689	0.00100503	0.707317	0	0.011583
GLYMA_07G222600	GLYMA_07G222600	0.0633367	0.00895809	0.163	0.0467694	0.0166207	0.0626979	0.0147405	0.0158487	0.00460435	0	0.0578164	0.0385459	0.119448	0.301101	0.792362	19.498	0.00530303	0.00152594	0.0326797	0.00662252	0.00305998	0.00639659	0.00135318	0.00138985	0.000543774	0	0.0162602	0.00330345	0.00603015	0.0121951	0.0449438	0.525097
GLYMA_12G154300	GLYMA_12G154300	0.0943537	0.0654711	0	0.117755	0.0557474	0.113924	0.0489089	0.0232262	0.0253696	0.0166941	0	0.0725167	0.101057	0	0.110249	20.549	0.00454545	0.00559512	0	0.00331126	0.00305998	0.00852878	0.0067659	0.00277971	0.00326264	0.00263505	0	0.00519113	0.0120603	0	0.0224719	0.351351
GLYMA_18G226300	GLYMA_18G226300	0.058337	0.161907	0.0899036	0	0.0294113	0.0219292	0.0342288	0.0508109	0	0.0133212	0	0.0203595	0.00459335	0.0116448	20.8214	0.0358992	0.00909091	0.0254323	0.0326797	0	0.00183599	0.00639659	0.00135318	0.0104239	0	0.00263505	0	0.0023596	0.00100503	0.0121951	0.292135	0.00772201
GLYMA_08G314900	GLYMA_08G314900	0.00292953	0	0	0	0.00271097	0	0.00459172	0	0.00187379	0	0	0.0103112	0.0163367	0	21.5281	0.0149913	0.000757576	0	0	0	0.00122399	0	0.00135318	0	0.000543774	0	0	0.000943841	0.00301508	0	0.516854	0.003861
GLYMA_06G065000	GLYMA_06G065000	0.0266851	0.0241166	0	0	0.0540574	0.00965739	0.0457299	0.0172264	0	0.0522654	0.0236615	0.0439173	0	21.8217	0	0.0330849	0.00378788	0.00305188	0	0	0.00611995	0.00426439	0.00541272	0.00208478	0	0.00395257	0.00813008	0.00471921	0	0.762195	0	0.003861
GLYMA_11G101300	GLYMA_11G101300	0.0282397	0.0454454	22.0751	0.268015	0.0405468	0	0.0530987	0	0	0.0147045	0.26725	0.00304367	0.0154436	0	0	0.0543401	0.0030303	0.00305188	0.888889	0.0231788	0.00489596	0	0.00270636	0	0	0.00131752	0.0325203	0.000471921	0.00201005	0	0	0.00772201
GLYMA_20G135300	GLYMA_20G135300	0.00195756	0.00146415	0.0252372	0.0264477	0	0	0.0451921	0	0	0.127433	22.3049	0.0186561	0	0.0655887	0.133285	0	0.000757576	0.000508647	0.0130719	0.00331126	0	0	0.00405954	0	0	0.0131752	0.658537	0.000943841	0	0.00609756	0.011236	0
GLYMA_17G133100	GLYMA_17G133100	0.0188372	0.0473487	22.4448	0	0.00207105	0	0.00726735	0.00194059	0	0	0	0.0229332	0.0267534	0.0378261	0	0	0.00227273	0.00813835	0.816993	0	0.000611995	0	0.00135318	0.000694927	0	0	0	0.00283152	0.00301508	0.00609756	0	0
GLYMA_20G052900	GLYMA_20G052900	0.0101729	0	0.0176314	0.0123233	0.00372486	0.0461538	0.0217288	0.0113871	0	0	0	0.102436	0.087031	0	22.9305	0.569619	0.00151515	0	0.00653595	0.00331126	0.000611995	0.00426439	0.00405954	0.000694927	0	0	0	0.00755073	0.00904523	0	0.617978	0.023166
GLYMA_04G010600	GLYMA_04G010600	0	0.0666201	23.4758	0	0.0354639	0	0.0142823	0.00397556	0.0032996	0	0	0	0	0	0	0	0	0.00661241	0.830065	0	0.00183599	0	0.00270636	0.000694927	0.000543774	0	0	0	0	0	0	0
GLYMA_06G225500	GLYMA_06G225500	0.00940504	0.0258179	0.0425241	0.116638	0.0173096	0.0623751	0.0218538	0.00235808	0.0117955	0.045642	0	0.0173999	0.0017136	23.7746	0	0	0.000757576	0.00305188	0.00653595	0.00993377	0.00183599	0.00639659	0.00270636	0.000694927	0.000543774	0.00395257	0	0.0023596	0.00100503	0.743902	0	0
GLYMA_06G294200	GLYMA_06G294200	0.0177796	0	0	0.0350398	0.00665503	0	0.00589878	0	0.0030949	0.00968767	0	0.015451	0	0	25.6131	0.102322	0.00227273	0	0	0.00331126	0.00122399	0	0.00135318	0	0.000543774	0.00131752	0	0.00141576	0	0	0.280899	0.019305
GLYMA_14G206500	GLYMA_14G206500	0.013116	0	0	0	0	0	0.0080146	0.00725394	0.0053521	0.0233256	0	0	0.00901299	0	26.9225	0.939537	0.00227273	0	0	0	0	0	0.00270636	0.000694927	0.000543774	0.00263505	0	0	0.00201005	0	0.662921	0.0540541
GLYMA_11G213500	GLYMA_11G213500	0.0223858	0.0170757	0	0.175434	0.0543195	0.0584697	0.00763215	0.0217458	0.0876836	0.0279608	0	0.383109	0.102052	27.1727	0.213206	0.0163984	0.00227273	0.00356053	0	0.00993377	0.00550796	0.0021322	0.00135318	0.00277971	0.00435019	0.00527009	0	0.0165172	0.0100503	0.469512	0.011236	0.003861
GLYMA_08G021700	GLYMA_08G021700	0.0229544	0.033085	0	0.0362679	0.421645	29.0928	0.0132515	0.0173737	0.0216075	0.0481468	0	0.0694348	0.0542162	0.0668649	0.0901039	0.0260359	0.00151515	0.00356053	0	0.00331126	0.0269278	0.618337	0.00270636	0.00208478	0.00108755	0.00395257	0	0.00660689	0.00703518	0.00609756	0.011236	0.00772201
GLYMA_18G197400	GLYMA_18G197400	0.0518537	0.00488145	0	0.0541941	0.00651799	0	0	0.00734595	0.0586505	0	0	0.0320072	0.0276978	29.3359	0	0.0300467	0.0030303	0.000508647	0	0.00331126	0.00183599	0	0	0.000694927	0.00108755	0	0	0.00283152	0.00201005	0.292683	0	0.003861
GLYMA_02G000700	GLYMA_02G000700	0.0248816	0	0	0	0.0282549	0.343559	0	0.0110871	0.00616846	0.0144426	0	0.0527355	0.0211625	0.0211281	30.974	0.637762	0.00227273	0	0	0	0.00305998	0.0191898	0	0.00138985	0.000543774	0.00263505	0	0.00519113	0.00201005	0.00609756	0.640449	0.03861
GLYMA_12G027200	GLYMA_12G027200	0.0214391	0.0381336	31.9255	0.0641027	0.0354151	0	0.010988	0	0	0	0	0.00304367	0	0	0	0	0.00227273	0.00610376	0.915033	0.00993377	0.00428397	0	0.00270636	0	0	0	0	0.000471921	0	0	0	0
GLYMA_05G216000	GLYMA_05G216000	0.116003	0.00271568	0	0	0.143025	0.0409251	0	0.00903676	0.0120479	0.024675	0	0.15426	0.22159	0.0130151	0.277545	32.7943	0.00681818	0.000508647	0	0	0.00367197	0.0021322	0	0.000694927	0.00163132	0.00658762	0	0.0108542	0.0251256	0.00609756	0.0449438	0.509653
GLYMA_07G161900	GLYMA_07G161900	0.0333024	0.0538332	0	0.0406788	0.00576271	0	0.0924389	0	0.0042153	0.0540639	35.6614	0.00801224	0.0209271	0.069161	0	0	0.00378788	0.00508647	0	0.00331126	0.00122399	0	0.00270636	0	0.000543774	0.00263505	0.837398	0.000471921	0.00100503	0.00609756	0	0
GLYMA_10G028300	GLYMA_10G028300	0.0649028	0.0715344	0	0.0645469	0.0166184	0.0111226	0.0425197	0.00619917	0.00717542	0.0951838	38.7015	0.0015342	0	0.0488195	0	0.0244058	0.00378788	0.00661241	0	0.00331126	0.00305998	0.0021322	0.00270636	0.000694927	0.00108755	0.00922266	0.845528	0.000471921	0	0.00609756	0	0.003861
GLYMA_15G246300	GLYMA_15G246300	0.00771327	0.0178119	0.00623183	0.0339965	0.0704718	0.069909	0.0304042	0.0214543	0.0011834	0.0103254	0.103832	0.173585	0.00845269	0	39.9366	0.0147592	0.00151515	0.00254323	0.00653595	0.00331126	0.00795594	0.0127932	0.00541272	0.00277971	0.000543774	0.00131752	0.00813008	0.0141576	0.00100503	0	0.516854	0.003861
GLYMA_02G149100	GLYMA_02G149100	0.0298662	0.0124516	40.0164	0.154489	0.0443646	0	0.0322466	0	0	0	0	0.0112576	0.0253134	0	0	0.0980198	0.00454545	0.000508647	0.875817	0.013245	0.00244798	0	0.00405954	0	0	0	0	0.000943841	0.00201005	0	0	0.00772201
GLYMA_07G222500	GLYMA_07G222500	0.0884	0.00554267	0.472172	0.0707844	0.0480522	0	0.0442216	0.0571247	0.0343847	0.0554547	0.0883704	0.104281	0.381255	0.208742	1.20329	40.6684	0.00757576	0.00101729	0.104575	0.00993377	0.00550796	0	0.00135318	0.00555942	0.00380642	0.00790514	0.00813008	0.00896649	0.0170854	0.0182927	0.0337079	0.586873
GLYMA_18G043200	GLYMA_18G043200	0.0337178	0	0	0.0362795	0.0196583	0.0418315	0.0244698	0.0143187	0.0171423	0.047312	0	0.135178	0.0537669	47.088	0	0.0170414	0.00378788	0	0	0.00662252	0.00183599	0.00639659	0.00135318	0.00138985	0.00163132	0.00263505	0	0.0113261	0.0040201	0.47561	0	0.003861
GLYMA_07G065000	GLYMA_07G065000	0.121943	0.0655454	0.0187169	0.0587103	0.112407	0.0176946	0.0962894	0.356148	0.230381	0.264245	0.0237791	0.113812	0.10699	0	52.1853	0.148162	0.0189394	0.0132248	0.00653595	0.00331126	0.0128519	0.0021322	0.0162382	0.0646282	0.0462208	0.0368906	0.00813008	0.00613497	0.0120603	0	0.640449	0.023166
GLYMA_10G024600	GLYMA_10G024600	0.0583105	0.0219483	55.5336	2.15769	0.0725242	0.0257813	0.0134511	0.0853869	0.0267608	0.0442953	0.0284468	0.0279926	0.0411177	0	0.0717036	0	0.00681818	0.00305188	0.875817	0.0927152	0.00611995	0.00639659	0.00135318	0.0180681	0.00652529	0.00658762	0.00813008	0.00424729	0.00502513	0	0.011236	0
GLYMA_06G242900	GLYMA_06G242900	0.448479	0.0206542	0	0.325392	0.213252	0.261317	0.0192369	0.0145443	0.0189888	0.0943992	0.161846	0.191335	0.259722	0.0659196	0.551062	58.4643	0.0106061	0.00152594	0	0.00662252	0.00734394	0.010661	0.00270636	0.000694927	0.00108755	0.00922266	0.0162602	0.0146295	0.0221106	0.00609756	0.0674157	0.548263
GLYMA_18G109100	GLYMA_18G109100	0.101457	0.00617832	0	0	0.214703	0.451578	0.00838841	0.0252234	0.02592	0.104264	0.133523	0.649732	0.695718	0.273202	98.8557	0.509919	0.00833333	0.00152594	0	0	0.0275398	0.0511727	0.00405954	0.00347464	0.00598151	0.0105402	0.0243902	0.0556866	0.079397	0.054878	0.808989	0.0810811
GLYMA_13G187000	GLYMA_13G187000	0.0189721	0.0198282	0.0353623	0.0114063	0.152015	0.0315368	0.0131967	0.122051	0.0254076	0.0048743	0.132896	0.403121	0.200108	0.111122	15.0927	0.131107	0.00227273	0.00356053	0.0130719	0.00331126	0.0171359	0.00426439	0.00405954	0.0291869	0.00543774	0.00131752	0.0243902	0.041529	0.0211055	0.0304878	0.47191	0.023166
GLYMA_15G014000	GLYMA_15G014000	0.0904384	0.00291823	0.0135068	0.0518059	0.0668282	0.0439012	0.01632	0.00867574	0.0103227	0.0293091	0.101484	0.276755	0.17807	0.147284	0.121871	5.59912	0.00909091	0.000508647	0.00653595	0.00662252	0.00673195	0.00426439	0.00270636	0.000694927	0.00271887	0.00658762	0.0162602	0.0226522	0.0221106	0.0121951	0.0224719	0.320463
GLYMA_16G104500	GLYMA_16G104500	0.231733	0.0655987	0.0738943	0.0572882	0.124497	0.770911	0.166509	0.0443706	0.0776341	0.307822	0.113771	0.629828	0.232422	0.0273188	18.3079	0.743504	0.0295455	0.008647	0.00653595	0.00331126	0.0159119	0.0490405	0.0189445	0.0076442	0.0130506	0.0197628	0.0162602	0.0391694	0.0251256	0.00609756	0.606742	0.0579151
GLYMA_05G050700	GLYMA_05G050700	0.104364	0.0846501	0.0304281	0.175271	0.385323	0.199924	0.0341245	0.288773	0.0422201	0.0276673	0.0118325	0.189499	0.219615	0.0225592	0.0425766	7.89693	0.0166667	0.0188199	0.00653595	0.013245	0.0501836	0.0426439	0.00541272	0.0590688	0.00870038	0.00527009	0.00813008	0.023596	0.0301508	0.0121951	0.011236	0.332046
GLYMA_18G213500	GLYMA_18G213500	0.139603	0.0983161	0.00920945	0.109617	0.241177	0.217613	0.114727	0.115288	0.11745	0.168718	0.0977173	0.226942	0.0461564	0.203712	4.88291	0.0466056	0.0204545	0.0167854	0.00653595	0.013245	0.0318237	0.0319829	0.0230041	0.0243224	0.021751	0.0263505	0.00813008	0.0283152	0.0080402	0.0304878	0.314607	0.011583
GLYMA_10G209200	GLYMA_10G209200	0.0933507	0.259559	16.2819	0.373829	0.41317	0.539044	0.131234	0.0687075	0.0363363	0.119525	0.132412	0.274896	0.307539	0.0513034	0.0717036	0.396732	0.0121212	0.0310275	0.901961	0.0364238	0.0593635	0.0746269	0.0270636	0.0166782	0.00435019	0.0223979	0.00813008	0.0302029	0.039196	0.0121951	0.011236	0.0501931
GLYMA_12G032800	GLYMA_12G032800	0.059745	0.0389541	0.037236	0.113291	0.0751834	0.0166059	0.0790475	0.0637222	0.0194398	0.0642767	0.105355	0.0837216	0.180707	0.0946298	0.0301636	4.22481	0.00984848	0.0111902	0.0196078	0.0231788	0.0116279	0.0021322	0.0175913	0.0180681	0.00380642	0.0118577	0.0162602	0.00943841	0.0301508	0.0121951	0.011236	0.3861
GLYMA_02G221300	GLYMA_02G221300	0.120479	0.103479	0.22512	0.105186	0.139853	0.133383	0.26537	0.070575	0.176729	0.107282	5.55173	0.168927	0.12302	0.109072	0.197816	0.161247	0.0166667	0.0193286	0.0392157	0.013245	0.0201958	0.0191898	0.0554804	0.0215427	0.0358891	0.0171278	0.406504	0.0207645	0.0160804	0.0426829	0.011236	0.011583
GLYMA_08G322900	GLYMA_08G322900	0.0266807	0.0532898	0.0917259	0.0810729	0.150751	0.10914	0.062905	0.0647767	0.073755	0.0921694	0.0970765	0.134751	0.0987608	0.0958197	0.0670403	0.0655728	0.00454545	0.0106816	0.0261438	0.00993377	0.0250918	0.0191898	0.0175913	0.0152884	0.0174008	0.0171278	0.0162602	0.0155734	0.0140704	0.0304878	0.011236	0.015444
GLYMA_11G033800	GLYMA_11G033800	0.0681548	0.171697	0.183589	0.231041	0.252874	0.371953	0.176398	0.154932	0.230152	0.267343	0.156856	0.267701	0.164263	0.319994	0.210929	0.207945	0.0128788	0.034588	0.0588235	0.0264901	0.0391677	0.0575693	0.0460081	0.0368311	0.0483959	0.0461133	0.0325203	0.0344502	0.0271357	0.0731707	0.0337079	0.03861
GLYMA_10G165100	GLYMA_10G165100	0.0534097	0.0909775	0.0833176	0.0818354	0.0719385	0.16733	0.108872	0.065394	0.0872381	0.0838271	0.1368	0.134361	0.0644376	0.0819689	0.126247	0.245552	0.00833333	0.0162767	0.0326797	0.00993377	0.0128519	0.0341151	0.0216509	0.018763	0.0179445	0.0197628	0.0162602	0.0169891	0.0100503	0.0182927	0.011236	0.023166
GLYMA_04G215400	GLYMA_04G215400	0.209776	0.409915	0.945723	0.680388	0.678727	0.440856	0.527084	0.685271	0.309746	0.347529	0.676118	0.653934	0.570157	0.49822	0.427961	0.430607	0.0363636	0.0834181	0.163399	0.0927152	0.115055	0.0810235	0.097429	0.14385	0.0647091	0.0540184	0.105691	0.0750354	0.080402	0.097561	0.0561798	0.0849421
GLYMA_08G016800	GLYMA_08G016800	0.0418251	0.0649609	0.10116	0.0725815	0.127373	0.0758432	0.107799	0.119372	0.0656318	0.0524729	0.0483933	0.123062	0.0666085	0.149423	0.177964	0.0957489	0.00757576	0.0147508	0.0522876	0.00993377	0.0257038	0.0170576	0.0189445	0.0347464	0.0141381	0.00922266	0.00813008	0.0184049	0.0120603	0.0365854	0.0224719	0.019305
GLYMA_03G220600	GLYMA_03G220600	0.0420753	0.0862282	0.152946	0.0716987	0.113708	0.175842	0.14997	0.0686197	0.117071	0.0921968	0.172064	0.0783374	0.141835	0.0746021	0.178045	0.151866	0.00681818	0.0157681	0.0457516	0.0198675	0.0195838	0.0255864	0.0351827	0.0152884	0.0266449	0.0171278	0.0243902	0.0113261	0.0221106	0.0243902	0.0224719	0.027027
GLYMA_17G215700	GLYMA_17G215700	0.128908	0.189189	0.150851	0.225626	0.244598	0.231713	0.269916	0.141432	0.219823	0.252935	0.536381	0.243465	0.24637	0.398583	0.222966	0.277511	0.0234848	0.034588	0.0457516	0.0331126	0.0361077	0.0383795	0.0649526	0.0326616	0.0500272	0.0408432	0.0813008	0.0349221	0.0371859	0.103659	0.0224719	0.03861
GLYMA_13G041200	GLYMA_13G041200	0.304348	0.3603	0.339594	0.355417	0.607656	0.414577	1.05849	0.506386	0.513161	0.388787	0.346245	0.493041	0.390397	0.31086	1.24279	0.572248	0.0477273	0.0676501	0.0653595	0.0496689	0.0875153	0.08742	0.182679	0.104934	0.101142	0.0671937	0.0650407	0.0575743	0.0653266	0.0731707	0.11236	0.100386
GLYMA_12G035600	GLYMA_12G035600	0.092831	0.192206	0.153359	0.169362	0.340825	0.375654	0.09917	0.169174	0.184266	0.119122	0.10124	0.339571	0.20073	0.167731	0.295917	0.225258	0.0113636	0.034588	0.0261438	0.0264901	0.0556916	0.0639659	0.0216509	0.0389159	0.0386079	0.0250329	0.0243902	0.0401133	0.0331658	0.0365854	0.0337079	0.030888
GLYMA_18G143900	GLYMA_18G143900	2.28227	2.52651	1.0173	1.54786	2.55906	2.58216	3.04286	2.69363	3.28755	2.54955	4.06903	2.89855	3.23499	2.16948	2.00683	3.00157	0.290909	0.355544	0.163399	0.149007	0.299878	0.307036	0.424899	0.404448	0.447526	0.333333	0.398374	0.285512	0.380905	0.359756	0.224719	0.316602
GLYMA_13G130400	GLYMA_13G130400	0.422779	0.311417	0.133695	0.350042	0.407588	0.317369	0.534707	0.287529	0.352294	0.312474	0.370714	0.411819	0.329537	0.244202	0.232692	0.314077	0.0628788	0.0681587	0.0457516	0.0529801	0.0642595	0.0597015	0.101488	0.0722724	0.0723219	0.0566535	0.0569106	0.047664	0.0552764	0.0670732	0.0449438	0.0772201
GLYMA_03G088100	GLYMA_03G088100	0.806322	1.37296	1.08687	1.10307	0.474957	0.486258	1.25996	1.42803	1.41174	1.00326	0.621704	0.697074	0.857223	0.721251	0.522294	0.357074	0.127273	0.209054	0.222222	0.139073	0.0654835	0.0724947	0.198917	0.251564	0.236542	0.14888	0.0731707	0.0769231	0.116583	0.121951	0.0561798	0.0617761
GLYMA_04G101300	GLYMA_04G101300	0.541842	0.554736	0.559226	0.644589	0.582237	0.371429	0.456254	0.478942	0.485106	0.446371	0.434307	0.481182	0.423723	0.458729	0.161186	0.330298	0.0795455	0.100712	0.163399	0.0927152	0.0911873	0.0788913	0.0893099	0.103544	0.100598	0.083004	0.0650407	0.0604059	0.0643216	0.0914634	0.0337079	0.0694981
GLYMA_03G122400	GLYMA_03G122400	0.133393	0.140205	0.26732	0.0744477	0.297667	0.1992	0.182333	0.140331	0.197861	0.192487	0.163135	0.18638	0.223356	0.0934814	0.189756	0.108239	0.0257576	0.0315361	0.0588235	0.0165563	0.0489596	0.0426439	0.0473613	0.0333565	0.0402393	0.0289855	0.0162602	0.0250118	0.038191	0.0182927	0.0224719	0.023166
GLYMA_15G258300	GLYMA_15G258300	0.433151	0.33109	0.16133	0.359647	0.406961	0.644941	0.548697	0.366743	0.375913	0.249636	0.309062	0.340216	0.429017	0.307925	0.349392	0.242554	0.0719697	0.0625636	0.0653595	0.0496689	0.0667075	0.115139	0.0906631	0.0840862	0.0815661	0.0434783	0.0487805	0.0448325	0.0633166	0.0609756	0.0449438	0.0540541
GLYMA_15G060700	GLYMA_15G060700	0.731629	0.925566	0.231597	0.62369	0.452217	0.480064	0.777905	0.760331	0.772238	0.521508	0.369366	0.434818	0.529997	0.415564	0.330552	0.346464	0.112121	0.159207	0.0784314	0.0728477	0.0679315	0.08742	0.138024	0.14524	0.147363	0.0843215	0.0569106	0.0585182	0.078392	0.103659	0.0337079	0.0617761
GLYMA_13G306500	GLYMA_13G306500	0.104846	0.139063	0.142856	0.357284	0.145859	0.240064	0.107848	0.145418	0.101859	0.154249	0.12925	0.203029	0.134819	0.189613	0.40695	0.177731	0.0189394	0.0264496	0.0392157	0.0430464	0.0263158	0.0405117	0.0230041	0.0347464	0.0222947	0.027668	0.0162602	0.029731	0.0261307	0.0731707	0.0337079	0.046332
GLYMA_17G111500	GLYMA_17G111500	0.442044	0.346791	0.205171	0.504408	0.437303	0.336805	0.345593	0.376318	0.453041	0.224941	0.15079	0.411875	0.346212	0.126257	0.137244	0.222218	0.0651515	0.0630722	0.0588235	0.0596026	0.0740514	0.0618337	0.0690122	0.0875608	0.0826536	0.0395257	0.0243902	0.0509674	0.0592965	0.0365854	0.0224719	0.027027
GLYMA_11G088400	GLYMA_11G088400	0.0735921	0.106049	0.147301	0.0643171	0.192604	0.256906	0.10687	0.0839091	0.114733	0.11204	0.0756287	0.19902	0.19233	0.117837	0.067891	0.162442	0.0143939	0.0198372	0.0588235	0.00993377	0.0269278	0.0490405	0.0189445	0.0243224	0.0190321	0.0250329	0.00813008	0.0245399	0.0301508	0.0365854	0.011236	0.030888
GLYMA_16G022300	GLYMA_16G022300	0.716366	0.712397	0.403531	0.27565	0.872432	0.616822	0.930149	0.830306	0.791987	0.73333	0.767362	1.10085	0.847085	0.453847	0.599999	0.883521	0.100758	0.129196	0.124183	0.0463576	0.134027	0.117271	0.166441	0.158443	0.136487	0.104084	0.113821	0.117508	0.105528	0.103659	0.0786517	0.138996
GLYMA_07G181500	GLYMA_07G181500	0.078431	0.0646113	0.0859862	0.162238	0.112456	0.110157	0.160689	0.0952082	0.115435	0.113594	0.0419942	0.107191	0.115263	0.0642335	0.167701	0.0741628	0.0128788	0.0152594	0.0326797	0.0264901	0.0201958	0.0149254	0.0270636	0.0208478	0.0266449	0.0237154	0.00813008	0.0127419	0.0190955	0.0243902	0.011236	0.015444
GLYMA_03G020800	GLYMA_03G020800	0.399689	0.387271	0.14397	0.276841	0.466246	0.38539	0.366623	0.507768	0.574615	0.571304	0.257497	0.412669	0.412418	0.158421	0.370367	0.278819	0.0590909	0.0661241	0.0457516	0.0364238	0.0716034	0.0682303	0.0595399	0.0958999	0.100054	0.0790514	0.0406504	0.053327	0.0552764	0.0487805	0.0561798	0.046332
GLYMA_06G122500	GLYMA_06G122500	1.2544	0.841418	0.457541	1.2485	1.82597	1.36254	1.22082	0.880796	0.874479	0.885843	1.58636	1.36861	0.990348	1.45271	0.865425	1.06469	0.167424	0.135809	0.104575	0.135762	0.222154	0.215352	0.211096	0.172342	0.153344	0.134387	0.227642	0.146767	0.143719	0.262195	0.101124	0.173745
GLYMA_09G242200	GLYMA_09G242200	0.171096	0.162063	0.0754441	0.239908	0.284405	0.204706	0.178697	0.171328	0.152364	0.212427	0.300914	0.199441	0.207048	0.149277	0.148099	0.202949	0.0257576	0.0330621	0.0196078	0.0397351	0.0465116	0.0469083	0.0365359	0.0375261	0.0320827	0.0382082	0.0406504	0.0287872	0.0311558	0.0304878	0.0224719	0.046332
GLYMA_13G229600	GLYMA_13G229600	1.32975	1.29941	1.75526	2.64967	1.16112	0.681252	1.85361	1.23373	1.03096	1.04917	1.13437	0.971348	0.835834	0.664334	2.05777	0.905054	0.188636	0.210071	0.30719	0.274834	0.173807	0.127932	0.284168	0.237665	0.18162	0.15942	0.146341	0.114205	0.133668	0.140244	0.202247	0.162162
GLYMA_18G139100	GLYMA_18G139100	0.428545	0.549974	0.603045	0.527589	0.36431	0.245493	0.321054	0.378015	0.281187	0.487144	0.654083	0.383451	0.354655	0.697057	0.417531	0.1748	0.0643939	0.107833	0.176471	0.0596026	0.0618115	0.0362473	0.0568336	0.0931202	0.0587276	0.0764163	0.0894309	0.0471921	0.0562814	0.134146	0.0786517	0.030888
GLYMA_11G004000	GLYMA_11G004000	0.179842	0.248209	0.520484	0.183576	0.208156	0.230873	0.227221	0.164773	0.159467	0.139937	0.319943	0.203036	0.21115	0.178043	0.331213	0.130535	0.0272727	0.0447609	0.143791	0.0264901	0.0342717	0.0341151	0.0365359	0.0375261	0.0282762	0.030303	0.0406504	0.023596	0.0341709	0.0365854	0.0337079	0.015444
GLYMA_07G194800	GLYMA_07G194800	0.312728	0.370411	0.296686	0.438895	0.727236	0.559617	0.40678	0.406914	0.409776	0.439165	0.270946	0.557446	0.370284	0.182391	0.60305	0.361043	0.055303	0.0625636	0.0980392	0.0430464	0.0966952	0.0959488	0.0717185	0.0813065	0.0717781	0.0711462	0.0487805	0.0679566	0.0623116	0.0426829	0.0786517	0.0694981
GLYMA_09G212100	GLYMA_09G212100	1.49744	1.54665	3.2377	1.79429	1.17042	1.28953	2.20067	1.32716	1.5721	1.2377	1.6079	1.50278	1.64334	1.39367	0.812345	1.02334	0.207576	0.2294	0.51634	0.208609	0.156671	0.181237	0.343708	0.243224	0.251223	0.179183	0.195122	0.173195	0.21608	0.243902	0.101124	0.177606
GLYMA_06G161300	GLYMA_06G161300	0.277778	0.421041	0.189427	0.450586	0.270663	0.171082	0.509009	0.242063	0.260817	0.234681	0.227001	0.197884	0.24032	0.205742	0.12773	0.302594	0.0537879	0.0829095	0.0718954	0.0629139	0.0581395	0.0405117	0.116373	0.0548992	0.0647091	0.0434783	0.0406504	0.0287872	0.0371859	0.0670732	0.011236	0.0501931
GLYMA_04G204600	GLYMA_04G204600	0.482183	0.240682	0.414134	0.254762	0.732946	0.72678	0.224805	0.622197	0.308667	0.617265	0.895828	0.612607	0.681876	0.45632	0.687049	0.4207	0.0674242	0.0391658	0.117647	0.0198675	0.106487	0.119403	0.0514208	0.126477	0.0516585	0.0922266	0.097561	0.0769231	0.0904523	0.097561	0.0786517	0.0733591
GLYMA_06G324000	GLYMA_06G324000	1.69898	1.72717	0.556127	0.620923	2.10818	1.80144	1.42194	1.52892	1.79189	1.65162	2.02716	2.18151	2.21559	1.72319	1.27167	2.13574	0.229545	0.261445	0.124183	0.0761589	0.260098	0.272921	0.2341	0.259208	0.280044	0.230567	0.252033	0.226522	0.280402	0.286585	0.168539	0.285714
GLYMA_16G015500	GLYMA_16G015500	0.117786	0.140478	0.115348	0.217207	0.210443	0.232292	0.146214	0.130731	0.125982	0.210129	0.223535	0.191098	0.188005	0.0833206	0.331909	0.215481	0.0242424	0.0228891	0.0588235	0.0331126	0.0361077	0.0362473	0.0324763	0.0277971	0.023926	0.0355731	0.0487805	0.023596	0.0261307	0.0243902	0.0337079	0.030888
GLYMA_09G223000	GLYMA_09G223000	0.0477934	0.0972707	0.043202	0.10048	0.0989864	0.0790553	0.172094	0.0804151	0.0987092	0.118059	0.129735	0.0692743	0.072907	0.095075	0.0868983	0.0954355	0.0113636	0.0208545	0.0261438	0.013245	0.0189718	0.0170576	0.0365359	0.0257123	0.0222947	0.0197628	0.0243902	0.0113261	0.0170854	0.0243902	0.011236	0.015444
GLYMA_07G252100	GLYMA_07G252100	2.11753	1.79628	1.40255	2.57973	1.38782	1.52634	2.20011	1.41717	1.55502	1.77067	4.02963	1.52761	1.49068	1.54398	1.01189	1.77364	0.270455	0.275687	0.287582	0.294702	0.194614	0.245203	0.330176	0.259903	0.25503	0.238472	0.365854	0.168476	0.20201	0.268293	0.0898876	0.235521
GLYMA_12G032300	GLYMA_12G032300	0.253251	0.380652	0.189988	0.113746	0.231447	0.178457	0.282354	0.440108	0.397423	0.4529	0.277091	0.310111	0.343183	0.217677	0.174452	0.202274	0.044697	0.0717192	0.0457516	0.0198675	0.0367197	0.0234542	0.0622463	0.0986796	0.0804785	0.0843215	0.0569106	0.0368098	0.0482412	0.0426829	0.0337079	0.042471
GLYMA_19G245100	GLYMA_19G245100	0.441459	0.590467	0.231366	0.293612	0.666575	0.607136	0.501627	0.420374	0.454789	0.362778	0.67859	0.60329	0.523911	0.523524	0.170482	0.258625	0.0681818	0.093591	0.0522876	0.0397351	0.0893513	0.098081	0.0893099	0.085476	0.0848287	0.0606061	0.0813008	0.0684285	0.0713568	0.0914634	0.0449438	0.0656371
GLYMA_06G320200	GLYMA_06G320200	0.410778	0.446893	0.325836	0.227012	0.415268	0.243731	0.5547	0.382856	0.439058	0.360921	0.558249	0.317124	0.390217	0.474098	0.903467	0.252554	0.0674242	0.0768057	0.0915033	0.0298013	0.0599755	0.0469083	0.102842	0.0917304	0.0897227	0.0566535	0.0650407	0.0405852	0.0552764	0.0853659	0.0898876	0.0617761
GLYMA_06G173700	GLYMA_06G173700	0.265556	0.165068	0.223624	0.177434	0.278244	0.14526	0.159979	0.131762	0.17886	0.122188	0.137209	0.262462	0.274738	0.235221	0.0699188	0.187721	0.0409091	0.0325534	0.0588235	0.0165563	0.0446756	0.0298507	0.0324763	0.0326616	0.0353453	0.027668	0.0243902	0.0330345	0.0452261	0.0670732	0.011236	0.03861
GLYMA_14G181300	GLYMA_14G181300	0.247005	0.155706	0.141291	0.207185	0.484988	0.413481	0.311114	0.224322	0.164732	0.164364	0.167758	0.340605	0.314715	0.429193	0.193107	0.121872	0.0363636	0.0330621	0.0522876	0.0264901	0.0789474	0.0767591	0.0595399	0.0486449	0.0342577	0.0289855	0.0325203	0.0372817	0.0522613	0.0731707	0.0337079	0.023166
GLYMA_07G069300	GLYMA_07G069300	0.534247	0.362603	0.235486	0.443992	0.327763	0.288944	0.917693	0.398976	0.469664	0.266217	0.249049	0.782255	0.628002	0.503222	0.936849	0.754912	0.0757576	0.0656155	0.0522876	0.0695364	0.0471236	0.0426439	0.147497	0.0868659	0.0908102	0.0500659	0.0406504	0.0887211	0.0914573	0.0792683	0.101124	0.135135
GLYMA_20G072600	GLYMA_20G072600	2.47188	1.98342	2.32538	2.53593	2.38644	2.22165	2.39583	2.3378	2.02672	2.40656	1.18514	1.95279	2.0129	1.16399	4.63025	1.56927	0.29697	0.300102	0.352941	0.284768	0.286414	0.302772	0.355886	0.375956	0.319195	0.314888	0.170732	0.204342	0.260302	0.243902	0.370787	0.250965
GLYMA_17G250500	GLYMA_17G250500	0.306887	0.310649	0.21882	0.310364	0.40524	0.282111	0.255798	0.337197	0.313067	0.257951	0.157659	0.458465	0.34068	0.627019	0.305641	0.309715	0.0522727	0.0508647	0.0849673	0.0430464	0.0624235	0.0575693	0.0500677	0.0736623	0.0598151	0.0447958	0.0243902	0.053799	0.0462312	0.140244	0.0449438	0.0579151
GLYMA_08G349000	GLYMA_08G349000	0.101073	0.132221	0.0515159	0.10886	0.0756967	0.0661719	0.159126	0.0804682	0.145376	0.118931	0.0787799	0.111177	0.155217	0.178998	0.17894	0.0450125	0.0166667	0.025941	0.0196078	0.013245	0.0152999	0.0149254	0.02977	0.019458	0.0293638	0.0158103	0.00813008	0.0122699	0.0301508	0.0365854	0.0337079	0.015444
GLYMA_05G088700	GLYMA_05G088700	0.647437	0.880044	1.55662	1.18289	0.598555	0.61854	1.09114	0.87144	0.824401	0.724565	0.606152	0.656566	0.706098	0.511753	1.27347	0.391519	0.094697	0.136317	0.287582	0.119205	0.0899633	0.0895522	0.166441	0.152189	0.1528	0.0935441	0.097561	0.0764512	0.105528	0.115854	0.11236	0.0617761
GLYMA_07G077000	GLYMA_07G077000	0.0904184	0.0842443	0.170052	0.258107	0.116441	0.0884573	0.0686312	0.0873422	0.0854477	0.117762	0.0831297	0.120216	0.0649415	0.170745	0.14581	0.164315	0.0159091	0.0178026	0.0326797	0.0298013	0.0201958	0.0191898	0.0121786	0.0271022	0.016857	0.0237154	0.00813008	0.0151015	0.0110553	0.0609756	0.0224719	0.023166
GLYMA_18G017600	GLYMA_18G017600	0.521137	0.597326	0.185114	0.452081	0.564203	0.64726	0.522808	0.66442	0.56647	0.546305	0.306019	0.644699	0.552245	0.50779	0.526043	0.735688	0.0772727	0.102238	0.0653595	0.0596026	0.0764994	0.100213	0.0960758	0.119527	0.0995106	0.085639	0.0569106	0.0731477	0.081407	0.121951	0.0898876	0.108108
GLYMA_07G192500	GLYMA_07G192500	1.48474	1.08369	0.411369	0.926134	0.640243	0.589094	1.63466	0.988342	0.807669	0.849787	1.15622	0.900715	1.26572	0.498621	0.798824	1.30105	0.20303	0.175992	0.124183	0.112583	0.0844553	0.104478	0.242219	0.184156	0.144644	0.121212	0.130081	0.0915526	0.172864	0.0853659	0.0898876	0.181467
GLYMA_19G055900	GLYMA_19G055900	0.229653	0.298305	0.413809	0.239122	0.337159	0.451645	0.355277	0.298868	0.296013	0.352268	0.56493	0.372704	0.499354	0.385509	0.142187	0.343754	0.0409091	0.0564598	0.0915033	0.0364238	0.0563035	0.0852878	0.0717185	0.0618485	0.062534	0.0645586	0.097561	0.0448325	0.0844221	0.0792683	0.0224719	0.0617761
GLYMA_04G238800	GLYMA_04G238800	0.836319	0.483422	0.593704	1.22246	0.779601	0.575733	0.570293	0.466598	0.429793	0.574182	0.358661	0.810905	0.564445	0.893552	0.457717	1.42481	0.121212	0.0986775	0.169935	0.142384	0.119339	0.08742	0.117727	0.0931202	0.0842849	0.100132	0.0650407	0.100047	0.0864322	0.164634	0.0674157	0.19305
GLYMA_10G070900	GLYMA_10G070900	0.442422	0.353462	0.544634	0.531041	0.214938	0.183354	0.426327	0.39276	0.537533	0.728384	0.313025	0.339721	0.673489	0.403624	0.362374	0.18821	0.0689394	0.0656155	0.124183	0.0629139	0.0324357	0.0298507	0.0798376	0.0681028	0.102773	0.110672	0.0650407	0.0372817	0.0924623	0.0670732	0.0224719	0.034749
GLYMA_12G062400	GLYMA_12G062400	0.37469	0.247108	0.180862	0.246257	0.271085	0.328459	0.36607	0.336921	0.396293	0.303391	0.337828	0.374974	0.255026	0.223347	0.0997865	0.19133	0.0560606	0.0437436	0.0784314	0.0430464	0.0403917	0.0554371	0.0784844	0.0590688	0.0810223	0.0513834	0.0650407	0.0438886	0.039196	0.054878	0.011236	0.034749
GLYMA_17G022900	GLYMA_17G022900	0.480493	0.377218	0.377143	0.697146	0.272848	0.346072	0.695597	0.296682	0.467188	0.403699	0.330056	0.424185	0.253741	0.302765	0.764545	0.19256	0.0795455	0.0793489	0.104575	0.0993377	0.0428397	0.0639659	0.139378	0.0722724	0.091354	0.0671937	0.0569106	0.0467202	0.041206	0.0792683	0.101124	0.03861
GLYMA_19G079700	GLYMA_19G079700	0.44809	0.590664	0.434572	0.576189	0.457469	0.488621	0.601257	0.570782	1.00553	0.688855	0.253275	0.573958	0.711622	0.440309	0.330116	0.27753	0.0712121	0.113937	0.111111	0.0761589	0.0642595	0.0852878	0.123139	0.117443	0.177814	0.113307	0.0569106	0.0722039	0.0974874	0.0914634	0.0449438	0.0540541
GLYMA_08G301700	GLYMA_08G301700	0.289763	0.159877	0.340833	0.440874	0.300629	0.237749	0.115925	0.217571	0.135676	0.360479	0.263996	0.331218	0.237581	0.401958	0.332276	0.111055	0.05	0.0289929	0.0784314	0.0529801	0.0495716	0.0447761	0.0230041	0.0458652	0.0326264	0.0645586	0.0569106	0.0410571	0.0442211	0.109756	0.0224719	0.023166
GLYMA_11G254400	GLYMA_11G254400	0.256617	0.204254	0.0941894	0.196214	0.337489	0.241661	0.187306	0.141332	0.155404	0.113469	0.0850187	0.280352	0.130405	0.175245	0.109496	0.195228	0.0401515	0.0396745	0.0261438	0.0264901	0.0550796	0.0383795	0.0419486	0.0368311	0.0293638	0.0171278	0.0243902	0.0330345	0.0201005	0.0365854	0.0224719	0.027027
GLYMA_13G172200	GLYMA_13G172200	0.842351	0.689097	0.284018	0.394813	0.836066	0.724721	0.849017	0.900227	1.02891	0.902279	1.12725	0.844325	0.967242	0.443838	0.465115	0.648378	0.109091	0.122584	0.0653595	0.0562914	0.122399	0.132196	0.152909	0.169562	0.182708	0.131752	0.121951	0.101935	0.142714	0.109756	0.0449438	0.108108
GLYMA_07G270200	GLYMA_07G270200	0.72558	0.647548	0.965909	0.676511	1.11932	1.41892	0.539015	0.78416	0.746158	0.695852	0.793301	1.33267	0.795345	0.357522	0.813542	0.767513	0.0977273	0.10885	0.222222	0.0629139	0.162791	0.200426	0.097429	0.14246	0.136487	0.101449	0.113821	0.137329	0.104523	0.0914634	0.0786517	0.0926641
GLYMA_01G208400	GLYMA_01G208400	0.210484	0.162251	0.17765	0.22797	0.319817	0.401593	0.172494	0.18326	0.187457	0.193581	0.101198	0.20973	0.171228	0.133638	0.220624	0.251652	0.0371212	0.0284842	0.0588235	0.0430464	0.0575275	0.0682303	0.0405954	0.0403058	0.0353453	0.0382082	0.0243902	0.0259556	0.0241206	0.0304878	0.0337079	0.034749
GLYMA_11G053600	GLYMA_11G053600	0.0818597	0.148986	0.184541	0.122911	0.0967894	0.0860569	0.142292	0.0658284	0.13126	0.178073	0.227149	0.127653	0.20007	0.239373	0.0603273	0.130755	0.0174242	0.0310275	0.0588235	0.0198675	0.0189718	0.0127932	0.0324763	0.0180681	0.0255574	0.030303	0.0406504	0.0160453	0.0281407	0.054878	0.011236	0.030888
GLYMA_11G066900	GLYMA_11G066900	0.0699089	0.0936816	0.0400998	0.0522252	0.0977	0.0348576	0.0892033	0.0941527	0.0888289	0.099411	0.138309	0.070854	0.075635	0.0636179	0.0486686	0.0654777	0.0159091	0.0193286	0.0196078	0.00662252	0.0152999	0.010661	0.014885	0.0250174	0.0190321	0.0105402	0.0243902	0.0103823	0.0160804	0.0121951	0.011236	0.015444
GLYMA_17G038400	GLYMA_17G038400	0.348384	0.485355	0.213665	0.659362	0.274481	0.287902	0.46747	0.410333	0.240754	0.26952	0.166253	0.203361	0.287434	0.205234	0.319264	0.435876	0.0583333	0.0869786	0.0653595	0.0794702	0.0428397	0.0575693	0.0703654	0.0965949	0.0511147	0.0461133	0.0406504	0.0302029	0.039196	0.0487805	0.0449438	0.0656371
GLYMA_17G204700	GLYMA_17G204700	0.206021	0.168867	0.102829	0.129505	0.230293	0.249254	0.188985	0.152175	0.124818	0.243607	0.345159	0.219368	0.239827	0.278478	0.087033	0.210096	0.0280303	0.0300102	0.0392157	0.00993377	0.0299878	0.0405117	0.0311231	0.0326616	0.0250136	0.0395257	0.0406504	0.0268995	0.0311558	0.0487805	0.011236	0.034749
GLYMA_09G154000	GLYMA_09G154000	0.290794	0.349276	0.238243	0.311273	0.365706	0.482669	0.326756	0.290411	0.231275	0.318204	0.341141	0.441411	0.400652	0.543322	0.917101	0.303157	0.0477273	0.0615463	0.0588235	0.0463576	0.0587515	0.0767591	0.0608931	0.0646282	0.0489396	0.055336	0.0487805	0.0556866	0.0623116	0.0853659	0.11236	0.0772201
GLYMA_13G233500	GLYMA_13G233500	0.351414	0.443987	0.154112	0.306869	0.47116	0.284552	0.421432	0.35014	0.380044	0.473803	0.611054	0.397648	0.330291	0.171149	0.241636	0.492443	0.0530303	0.0768057	0.0522876	0.0331126	0.0783354	0.0597015	0.0798376	0.0785268	0.0717781	0.0750988	0.0894309	0.0490798	0.0542714	0.0609756	0.0449438	0.0772201
GLYMA_18G280600	GLYMA_18G280600	0.224243	0.348949	0.262431	0.183256	0.231584	0.428792	0.30409	0.357439	0.24864	0.383325	0.336354	0.322286	0.298435	0.108151	0.134557	0.230055	0.0416667	0.0722279	0.0915033	0.0364238	0.0458996	0.0703625	0.0703654	0.0903405	0.0609027	0.0698287	0.0487805	0.0410571	0.0542714	0.0304878	0.0224719	0.046332
GLYMA_19G139800	GLYMA_19G139800	1.43652	0.811264	0.590382	0.628866	0.786353	0.653783	0.817497	0.608933	0.641134	0.540608	1.11924	0.775918	0.637722	0.749467	0.362454	0.547469	0.178788	0.141404	0.189542	0.089404	0.127907	0.117271	0.146143	0.131341	0.115824	0.0909091	0.130081	0.0934403	0.0994975	0.134146	0.0224719	0.0656371
GLYMA_07G220800	GLYMA_07G220800	1.26344	1.32023	0.520797	0.889303	2.00764	1.81291	0.903665	1.52862	1.10391	1.32254	1.49204	1.80405	1.4249	2.06373	1.6731	1.08255	0.178788	0.204985	0.176471	0.115894	0.24541	0.260128	0.152909	0.275191	0.194127	0.188406	0.252033	0.204814	0.188945	0.323171	0.202247	0.181467
GLYMA_09G007100	GLYMA_09G007100	0.18214	0.119009	0.162652	0.385292	0.140174	0.148123	0.135371	0.141523	0.138272	0.158823	0.339317	0.0978281	0.0972465	0.271992	0.182027	0.13299	0.0272727	0.0213632	0.0653595	0.0463576	0.0189718	0.0234542	0.02977	0.0333565	0.0277325	0.0237154	0.0406504	0.0132138	0.0170854	0.054878	0.0224719	0.030888
GLYMA_02G044000	GLYMA_02G044000	0.660936	0.505638	0.318143	0.357529	1.04972	1.2595	0.649025	0.588768	0.938301	0.780984	0.637466	1.06213	0.81151	0.374583	0.437994	0.446898	0.0984848	0.0869786	0.104575	0.0430464	0.151163	0.183369	0.11502	0.111188	0.151169	0.125165	0.0894309	0.119396	0.115578	0.0792683	0.0786517	0.0733591
GLYMA_11G165600	GLYMA_11G165600	0.252234	0.426424	0.29182	0.482286	0.24703	0.175945	0.360617	0.351065	0.258433	0.193332	0.340772	0.190625	0.261902	0.29926	0.121865	0.285349	0.0340909	0.0752798	0.0980392	0.0728477	0.0434517	0.0298507	0.0554804	0.0653231	0.0483959	0.0289855	0.0487805	0.0212364	0.0361809	0.0670732	0.011236	0.030888
GLYMA_09G085300	GLYMA_09G085300	1.23065	1.17719	2.95249	1.75439	2.40029	1.90176	1.38221	1.3285	0.973442	1.45902	1.56242	1.82318	1.33509	2.20993	1.81149	0.746195	0.183333	0.199898	0.496732	0.208609	0.302938	0.272921	0.236806	0.244614	0.179989	0.223979	0.203252	0.189712	0.194975	0.353659	0.202247	0.108108
GLYMA_10G192100	GLYMA_10G192100	0.82029	1.14218	0.637726	0.472933	0.583007	0.49399	0.747684	1.09005	1.04399	1.29676	0.647252	0.872057	1.4217	0.359368	0.560796	0.645324	0.126515	0.174466	0.156863	0.0629139	0.0783354	0.08742	0.11908	0.19458	0.182164	0.184453	0.0894309	0.0995753	0.18794	0.0731707	0.0449438	0.0965251
GLYMA_03G231900	GLYMA_03G231900	0.211735	0.14116	0.0873454	0.337063	0.217876	0.240297	0.195014	0.171998	0.19737	0.17509	0.300184	0.345482	0.197095	0.0878613	0.225231	0.223629	0.0333333	0.0279756	0.0457516	0.0430464	0.0342717	0.0341151	0.0419486	0.038221	0.0418706	0.0342556	0.0569106	0.0434167	0.0361809	0.0182927	0.0224719	0.030888
GLYMA_01G023200	GLYMA_01G023200	0.36112	0.331093	0.496047	0.43369	0.267708	0.170879	0.675872	0.259838	0.475282	0.345068	0.309322	0.417903	0.356444	0.247033	0.516025	0.499489	0.0530303	0.0640895	0.124183	0.0662252	0.0489596	0.0277186	0.127199	0.0590688	0.0929853	0.0540184	0.0731707	0.0462482	0.0633166	0.0487805	0.0674157	0.0926641
GLYMA_09G119200	GLYMA_09G119200	1.0482	1.09792	0.576463	0.893337	1.34916	1.23634	1.07305	1.80178	1.68918	2.1028	0.643512	2.08945	2.27992	0.948972	0.951759	1.39728	0.156061	0.185656	0.150327	0.0860927	0.176255	0.204691	0.184032	0.305073	0.272431	0.27668	0.0813008	0.21142	0.277387	0.213415	0.134831	0.200772
GLYMA_19G191200	GLYMA_19G191200	0.259736	0.212741	0.546294	0.333118	0.433894	0.286074	0.226723	0.23311	0.242431	0.281437	0.363497	0.262433	0.189468	0.363414	0.749291	0.264086	0.0393939	0.043235	0.143791	0.0430464	0.0728274	0.0575693	0.052774	0.0535094	0.0511147	0.0408432	0.0487805	0.0335064	0.0321608	0.0670732	0.0674157	0.03861
GLYMA_13G083100	GLYMA_13G083100	0.270862	0.320453	0.296879	0.310908	0.438587	0.718452	0.335042	0.35107	0.274141	0.254233	0.70488	0.505396	0.300978	0.538831	0.447708	0.18172	0.0462121	0.0564598	0.0718954	0.0529801	0.0691554	0.119403	0.067659	0.0778318	0.0614464	0.0461133	0.0731707	0.059462	0.0442211	0.158537	0.0449438	0.042471
GLYMA_17G112600	GLYMA_17G112600	0.661328	0.708445	0.603517	0.343607	0.500605	0.610336	0.684799	0.720705	0.897682	0.736763	0.510452	0.637434	0.807797	0.632061	1.35825	0.682544	0.0992424	0.122584	0.124183	0.0629139	0.0703794	0.100213	0.127199	0.134121	0.148994	0.110672	0.0894309	0.0731477	0.110553	0.097561	0.134831	0.119691
GLYMA_19G083100	GLYMA_19G083100	0.25256	0.264642	0.209953	0.448166	0.28789	0.175974	0.17076	0.273588	0.244995	0.350144	0.176946	0.244848	0.320251	0.360119	0.129475	0.511449	0.0522727	0.0569685	0.0718954	0.0529801	0.0575275	0.0255864	0.0392422	0.0715775	0.05764	0.0645586	0.0487805	0.0349221	0.0572864	0.097561	0.0224719	0.104247
GLYMA_10G188500	GLYMA_10G188500	0.827993	0.528222	0.752082	1.16788	0.658519	0.456606	0.478154	0.615599	0.295695	0.481196	0.335663	0.672703	0.677324	0.49539	0.385408	0.606767	0.130303	0.0956256	0.202614	0.172185	0.0954712	0.0810235	0.0987821	0.129951	0.0516585	0.0737813	0.0569106	0.0736196	0.0974874	0.103659	0.0561798	0.0926641
GLYMA_20G200300	GLYMA_20G200300	1.46173	0.794586	0.896898	0.774152	3.0361	2.40899	2.35915	1.50799	1.61856	2.0907	1.48015	3.05748	2.04398	2.52258	1.62929	0.897507	0.193939	0.12767	0.235294	0.109272	0.345777	0.332623	0.331529	0.258513	0.241436	0.277997	0.186992	0.293063	0.262312	0.371951	0.134831	0.169884
GLYMA_07G199600	GLYMA_07G199600	0.443361	0.377059	0.136801	0.259232	0.315033	0.131904	0.283462	0.516831	0.470745	0.493601	0.379319	0.326818	0.364612	0.130901	0.400666	0.251166	0.075	0.0640895	0.0326797	0.0430464	0.0416157	0.0277186	0.0568336	0.0993746	0.0978793	0.0764163	0.0406504	0.0438886	0.0552764	0.0365854	0.0449438	0.0656371
GLYMA_09G000500	GLYMA_09G000500	0.337707	0.36061	0.266062	0.535483	0.365622	0.381596	0.384237	0.45127	0.331408	0.303903	0.135694	0.350604	0.309895	0.468625	0.207929	0.290409	0.055303	0.0732452	0.0915033	0.0761589	0.0636475	0.0703625	0.0893099	0.101459	0.0739532	0.055336	0.0406504	0.0424729	0.0492462	0.109756	0.0224719	0.0656371
GLYMA_16G062200	GLYMA_16G062200	0.217187	0.295574	0.290136	0.25756	0.240521	0.222763	0.259141	0.289212	0.199689	0.329222	0.0986571	0.212696	0.21986	0.166171	0.196299	0.389162	0.0409091	0.060529	0.0653595	0.0298013	0.0446756	0.0426439	0.0581867	0.0660181	0.0554649	0.0513834	0.0243902	0.0283152	0.041206	0.0609756	0.0224719	0.0579151
GLYMA_06G141700	GLYMA_06G141700	0.292535	0.321481	0.231862	0.414658	0.372542	0.504002	0.379276	0.360643	0.300317	0.246131	0.47835	0.397351	0.314856	0.220815	0.772874	0.19594	0.0530303	0.0549339	0.0718954	0.0463576	0.0575275	0.0810235	0.0744249	0.0743572	0.0636215	0.0461133	0.0650407	0.0467202	0.0512563	0.0426829	0.0786517	0.042471
GLYMA_18G286200	GLYMA_18G286200	0.215469	0.208705	0.317683	0.213905	0.170823	0.187676	0.405221	0.22762	0.209194	0.126854	0.179125	0.221482	0.126965	0.354421	0.244387	0.500239	0.0371212	0.0381485	0.0915033	0.0331126	0.0257038	0.0341151	0.067659	0.04795	0.045677	0.0250329	0.0325203	0.0268995	0.0190955	0.054878	0.0224719	0.0888031
GLYMA_05G046000	GLYMA_05G046000	16.6455	18.9258	10.8706	15.3715	7.65774	5.58908	13.7877	16.4189	15.3253	14.1733	8.64594	9.63368	14.6398	4.79959	7.63375	9.49144	0.746212	0.855544	0.823529	0.764901	0.526316	0.462687	0.788904	0.838777	0.833061	0.762846	0.577236	0.536574	0.735678	0.445122	0.449438	0.579151
GLYMA_09G155400	GLYMA_09G155400	0.263471	0.332894	0.115736	0.130933	0.260481	0.223265	0.252774	0.270006	0.289263	0.312908	0.104348	0.287437	0.368156	0.119064	0.41139	0.149468	0.0363636	0.0554425	0.0326797	0.0264901	0.0391677	0.0469083	0.0419486	0.0583739	0.0527461	0.0421607	0.0325203	0.0349221	0.0562814	0.0365854	0.0449438	0.034749
GLYMA_07G024000	GLYMA_07G024000	0.727111	0.491658	0.858633	0.956412	0.560803	0.462824	0.654767	0.4765	0.361639	0.616352	1.08887	0.659751	0.714603	0.50024	1.42574	0.953713	0.109848	0.0895219	0.196078	0.122517	0.0875153	0.0767591	0.113667	0.0938151	0.0712344	0.0961792	0.138211	0.0792827	0.112563	0.134146	0.11236	0.162162
GLYMA_17G150200	GLYMA_17G150200	0.748197	0.849759	0.370836	0.776893	1.00323	1.06095	0.691638	1.4613	0.822883	0.925416	1.28589	1.06772	1.19053	0.589349	0.536015	0.604422	0.109091	0.139369	0.0915033	0.0695364	0.134027	0.170576	0.128552	0.251564	0.135943	0.130435	0.195122	0.115149	0.157789	0.097561	0.0786517	0.111969
GLYMA_07G031500	GLYMA_07G031500	0.195439	0.161172	0.250376	0.210026	0.315863	0.283379	0.16627	0.232592	0.16562	0.207855	0.0896459	0.242244	0.178256	0.246725	0.353221	0.229911	0.0280303	0.0320448	0.0784314	0.0231788	0.0581395	0.0511727	0.02977	0.0583739	0.0304513	0.0355731	0.0162602	0.0292591	0.0331658	0.0426829	0.0337079	0.0501931
GLYMA_05G234300	GLYMA_05G234300	0.490608	0.514055	0.55684	0.479073	0.706653	0.667919	0.545474	0.544822	0.425612	0.382006	0.435211	0.581675	0.483846	0.17935	0.499094	0.456242	0.0719697	0.0910478	0.124183	0.0695364	0.102203	0.127932	0.100135	0.109104	0.0842849	0.0711462	0.0731707	0.0693723	0.0753769	0.0426829	0.0786517	0.0733591
GLYMA_01G064400	GLYMA_01G064400	0.788341	0.887875	0.980505	1.00094	0.312953	0.788306	0.712612	0.496613	0.422313	0.450333	0.534068	0.390543	0.450177	0.332574	0.254045	0.462176	0.118182	0.129705	0.20915	0.122517	0.0526316	0.102345	0.128552	0.100764	0.0870038	0.0566535	0.0487805	0.0467202	0.0623116	0.0670732	0.0449438	0.0579151
GLYMA_06G153200	GLYMA_06G153200	0.830838	0.43896	0.696805	0.445159	0.35409	0.412587	0.29952	0.466051	0.286807	0.914439	1.00614	0.726854	0.512689	0.520563	0.255511	0.557551	0.118939	0.0854527	0.169935	0.0596026	0.0544676	0.0724947	0.0595399	0.0945101	0.0619902	0.147563	0.146341	0.0816423	0.0763819	0.121951	0.0449438	0.0926641
GLYMA_17G024800	GLYMA_17G024800	2.32084	3.53143	2.47682	1.80357	1.35797	1.17581	2.67316	2.66669	3.36822	2.11302	1.95774	1.75283	1.9456	1.235	0.897167	1.39993	0.306061	0.436419	0.437908	0.221854	0.170747	0.162047	0.339648	0.391939	0.444807	0.27141	0.235772	0.184049	0.252261	0.213415	0.134831	0.200772
GLYMA_12G222600	GLYMA_12G222600	0.1337	0.0923272	0.0759611	0.120696	0.0941271	0.140052	0.0737456	0.0919942	0.151079	0.10464	0.124869	0.101979	0.174584	0.0445505	0.0886116	0.0443668	0.0257576	0.0213632	0.0261438	0.0198675	0.0171359	0.021322	0.0162382	0.0180681	0.0277325	0.0197628	0.0325203	0.0132138	0.0261307	0.0121951	0.011236	0.011583
GLYMA_10G298000	GLYMA_10G298000	0.390774	0.508626	0.240509	0.329967	0.933928	0.782767	0.733753	0.550456	0.744748	0.634431	0.5753	0.877212	0.790295	0.946331	0.656022	0.526061	0.0643939	0.0803662	0.0718954	0.0562914	0.131579	0.1258	0.142084	0.100764	0.119086	0.0909091	0.0894309	0.0962718	0.112563	0.182927	0.0898876	0.0888031
GLYMA_11G107500	GLYMA_11G107500	0.536388	0.557407	0.483314	0.454007	0.631353	0.440058	0.593029	0.489233	0.388101	0.451221	0.216457	0.596082	0.546347	0.698741	0.730143	0.851451	0.0772727	0.0940997	0.117647	0.0596026	0.0911873	0.0852878	0.110961	0.0972898	0.0788472	0.0698287	0.0406504	0.0764512	0.0753769	0.115854	0.101124	0.138996
GLYMA_13G004100	GLYMA_13G004100	0.332268	0.245348	0.475189	0.340464	0.204375	0.243668	0.246916	0.274281	0.244652	0.330123	0.294067	0.259014	0.163652	0.170028	0.271744	0.120823	0.0507576	0.0442523	0.137255	0.0463576	0.0330477	0.0405117	0.0595399	0.0618485	0.0473083	0.0619236	0.0569106	0.035866	0.0281407	0.0426829	0.0449438	0.042471
GLYMA_15G171800	GLYMA_15G171800	0.25305	0.113697	0.0885525	0.0683074	0.268622	0.146779	0.154626	0.147394	0.107098	0.213972	0.242556	0.151365	0.169836	0.241418	0.087033	0.239412	0.0416667	0.0239064	0.0326797	0.0165563	0.0391677	0.0319829	0.037889	0.0298819	0.0206634	0.030303	0.0325203	0.0188768	0.0311558	0.0365854	0.011236	0.042471
GLYMA_08G134600	GLYMA_08G134600	1.42284	1.08425	0.719407	0.458657	0.936334	0.56427	0.977902	1.65653	1.75008	1.16851	1.8032	1.21643	0.951176	0.58202	1.70616	0.686222	0.175	0.179044	0.130719	0.0662252	0.129131	0.0938166	0.171854	0.296734	0.26808	0.150198	0.195122	0.13025	0.126633	0.109756	0.191011	0.11583
GLYMA_10G075900	GLYMA_10G075900	0.981403	1.26188	0.358392	0.481344	0.722559	0.627384	1.29483	1.00998	1.30416	1.40883	0.693705	0.90052	0.876988	0.766496	0.548882	0.826929	0.143182	0.197355	0.111111	0.0794702	0.0954712	0.104478	0.231394	0.19319	0.230016	0.214756	0.0894309	0.110901	0.138693	0.152439	0.0786517	0.146718
GLYMA_02G044700	GLYMA_02G044700	0.211168	0.3082	0.334451	0.226433	0.277256	0.310469	0.27626	0.26275	0.245271	0.234027	0.20884	0.288432	0.182298	0.0850882	0.150187	0.287167	0.0386364	0.0590031	0.0849673	0.0331126	0.0458996	0.0469083	0.0581867	0.0653231	0.0560087	0.0395257	0.0406504	0.0349221	0.0271357	0.0182927	0.0224719	0.03861
GLYMA_07G269200	GLYMA_07G269200	0.202103	0.160633	0.24531	0.128419	0.0985551	0.145369	0.155686	0.189657	0.120884	0.191303	0.114688	0.158761	0.170766	0.193669	0.0779192	0.30616	0.0371212	0.0381485	0.0980392	0.0198675	0.0171359	0.0298507	0.037889	0.0451703	0.0369766	0.0355731	0.0243902	0.0259556	0.0291457	0.0426829	0.011236	0.0617761
GLYMA_20G228700	GLYMA_20G228700	0.314863	0.510679	0.200318	0.388705	0.26008	0.286707	0.412239	0.347023	0.391586	0.295433	0.237173	0.455044	0.369594	0.141462	0.13001	0.222553	0.0507576	0.0930824	0.0588235	0.0596026	0.0422277	0.0575693	0.0866035	0.0736623	0.0821098	0.0434783	0.0487805	0.0523832	0.0592965	0.0426829	0.0224719	0.034749
GLYMA_13G035400	GLYMA_13G035400	0.28061	0.256899	0.225246	0.360835	0.488624	0.884667	0.483578	0.287661	0.349483	0.329081	0.319543	0.403599	0.406685	0.256771	0.27562	0.231644	0.0530303	0.0493388	0.0588235	0.0463576	0.0746634	0.159915	0.100135	0.0618485	0.0679717	0.0527009	0.0406504	0.0528551	0.0613065	0.0731707	0.0224719	0.042471
GLYMA_18G040400	GLYMA_18G040400	2.81791	2.08415	2.15056	0.852249	1.47768	1.32421	1.3252	2.78392	2.61346	1.08492	1.02749	1.88428	2.26336	0.768418	1.23673	3.01765	0.290152	0.286368	0.359477	0.119205	0.182375	0.181237	0.215156	0.392634	0.34584	0.14888	0.121951	0.182633	0.274372	0.164634	0.146067	0.332046
GLYMA_09G016700	GLYMA_09G016700	0.149417	0.172902	0.149152	0.246001	0.114954	0.110111	0.17716	0.135494	0.146656	0.138608	0.10384	0.149659	0.0724116	0.137477	0.12769	0.284343	0.0257576	0.0330621	0.0457516	0.0430464	0.0177479	0.0277186	0.0473613	0.0361362	0.0413268	0.030303	0.0162602	0.0184049	0.0160804	0.0365854	0.0224719	0.0501931
GLYMA_08G121300	GLYMA_08G121300	0.137152	0.128777	0.147792	0.067314	0.264324	0.171252	0.1403	0.150435	0.0845167	0.113218	0.116073	0.193116	0.0995892	0.12147	0.0745584	0.106738	0.0212121	0.0223805	0.0588235	0.00993377	0.0361077	0.0319829	0.0257104	0.0250174	0.0184883	0.0118577	0.0162602	0.0231241	0.0130653	0.0243902	0.011236	0.015444
GLYMA_02G005000	GLYMA_02G005000	0.220598	0.236045	0.240986	0.203633	0.232548	0.221258	0.173715	0.239295	0.165203	0.219384	0.285818	0.245621	0.16321	0.0727945	0.196777	0.270008	0.0356061	0.0467955	0.0718954	0.0331126	0.0373317	0.0383795	0.0311231	0.0486449	0.0413268	0.0447958	0.0406504	0.0287872	0.0291457	0.0243902	0.011236	0.03861
GLYMA_19G196000	GLYMA_19G196000	0.371516	0.416448	0.274184	0.390267	0.36801	0.323598	0.376584	0.35257	0.399616	0.388741	0.539867	0.51266	0.507027	0.503023	1.07599	0.534236	0.0598485	0.0773143	0.0718954	0.0662252	0.0611995	0.0554371	0.082544	0.0813065	0.0826536	0.0606061	0.0731707	0.059462	0.081407	0.103659	0.11236	0.0888031
GLYMA_20G076300	GLYMA_20G076300	0.0809887	0.0709211	0.0470423	0.0578876	0.0774645	0.0665228	0.0584173	0.0856974	0.0738861	0.0919862	0.145617	0.0597982	0.0853124	0.0893904	0.184498	0.0823239	0.0136364	0.0137335	0.0196078	0.00662252	0.0146879	0.0149254	0.0216509	0.0180681	0.016857	0.0158103	0.0243902	0.00802265	0.0130653	0.0243902	0.011236	0.00772201
GLYMA_10G006500	GLYMA_10G006500	0.164472	0.152037	0.179887	0.128237	0.357576	0.25256	0.100805	0.202709	0.104491	0.219802	0.129376	0.228978	0.206629	0.166681	0.395349	0.378749	0.0295455	0.0264496	0.0588235	0.0165563	0.0642595	0.0575693	0.0216509	0.0451703	0.0174008	0.0329381	0.0243902	0.0316187	0.0291457	0.0365854	0.0561798	0.0540541
GLYMA_14G115000	GLYMA_14G115000	0.19263	0.107024	0.103848	0.121421	0.106908	0.0870347	0.0624283	0.14556	0.0892223	0.159125	0.115019	0.110022	0.13861	0.0491343	0.148934	0.095949	0.0257576	0.0218718	0.0392157	0.0198675	0.0159119	0.0149254	0.0135318	0.0340514	0.0184883	0.0250329	0.0162602	0.0136857	0.0231156	0.00609756	0.0224719	0.019305
GLYMA_01G161200	GLYMA_01G161200	0.989582	1.62722	0.646769	1.40507	0.938977	1.21069	1.18462	1.44318	1.82712	1.42914	0.545678	1.90303	1.6129	0.583424	2.13872	0.621943	0.131818	0.233469	0.156863	0.155629	0.114443	0.162047	0.184032	0.216122	0.26373	0.176548	0.0813008	0.177914	0.178894	0.0792683	0.123596	0.0926641
GLYMA_15G231700	GLYMA_15G231700	0.211062	0.216041	0.405179	0.187677	0.33603	0.278634	0.18524	0.298533	0.200496	0.344712	0.230923	0.302062	0.264232	0.178878	0.572113	0.145998	0.0371212	0.0381485	0.117647	0.0331126	0.0483476	0.0511727	0.0311231	0.0583739	0.0386079	0.0540184	0.0487805	0.0372817	0.0442211	0.0609756	0.0561798	0.034749
GLYMA_06G036100	GLYMA_06G036100	0.876475	0.620363	1.29004	0.973445	0.518327	0.379722	0.39337	0.642351	0.345378	0.582578	0.353606	0.403573	0.555071	0.393941	0.329319	0.738642	0.129545	0.111902	0.228758	0.129139	0.0820073	0.0703625	0.0757781	0.127867	0.0668842	0.0895916	0.0487805	0.0486078	0.0773869	0.0670732	0.0337079	0.104247
GLYMA_12G159600	GLYMA_12G159600	0.877716	0.92246	0.406227	0.501024	0.996833	0.867498	1.1178	0.994339	0.928637	1.17729	0.661627	0.956983	1.46961	0.375283	0.416479	0.951536	0.12197	0.157172	0.137255	0.0662252	0.145655	0.138593	0.181326	0.182071	0.167482	0.16469	0.130081	0.113733	0.21005	0.0670732	0.0561798	0.15444
GLYMA_13G067800	GLYMA_13G067800	1.59209	1.51911	1.33346	1.73724	1.09907	1.70291	1.59694	1.20708	1.41228	4.06527	2.08846	1.423	1.65746	1.45805	1.73429	1.0384	0.208333	0.230417	0.261438	0.188742	0.150551	0.24307	0.231394	0.216817	0.230016	0.432148	0.276423	0.155262	0.217085	0.268293	0.146067	0.177606
GLYMA_01G192100	GLYMA_01G192100	0.290717	0.286808	0.233473	0.204539	0.344887	0.150972	0.266953	0.24469	0.419174	0.255996	0.468	0.379243	0.3107	0.41471	0.59062	0.464959	0.0431818	0.0473042	0.0588235	0.0298013	0.0520196	0.0319829	0.0554804	0.0396108	0.0723219	0.0382082	0.0487805	0.0429448	0.0432161	0.0853659	0.0449438	0.0733591
GLYMA_12G239500	GLYMA_12G239500	0.218055	0.235635	0.15579	0.101127	0.291681	0.340096	0.192771	0.219724	0.222516	0.123704	0.395574	0.257419	0.281469	0.245541	0.386689	0.364673	0.0424242	0.0462869	0.0326797	0.013245	0.0434517	0.0597015	0.0405954	0.0500347	0.0451332	0.0223979	0.0487805	0.0330345	0.041206	0.0426829	0.0561798	0.042471
GLYMA_07G034600	GLYMA_07G034600	0.371979	0.433997	0.299664	0.260748	0.389095	0.327086	0.353458	0.408358	0.462304	0.362267	0.169746	0.318985	0.279885	0.118203	0.379037	0.233637	0.0628788	0.0757884	0.0784314	0.0529801	0.0624235	0.0660981	0.0757781	0.0868659	0.0924415	0.055336	0.0406504	0.0391694	0.0432161	0.0365854	0.0449438	0.046332
GLYMA_14G001500	GLYMA_14G001500	1.82406	2.19175	1.18073	1.82996	1.63457	1.62417	2.07225	1.74387	2.05198	2.27208	4.61697	1.98543	1.83546	1.43323	2.31913	1.93226	0.248485	0.310275	0.281046	0.201987	0.219706	0.245203	0.312585	0.302293	0.325177	0.29776	0.430894	0.208117	0.251256	0.243902	0.247191	0.297297
GLYMA_02G281300	GLYMA_02G281300	0.471208	0.438172	0.681691	0.408215	0.390157	0.509255	0.455266	0.525706	0.338729	0.376563	0.174441	0.449342	0.336835	0.195376	0.18915	0.289308	0.0734848	0.0773143	0.130719	0.0629139	0.0630355	0.0852878	0.0838972	0.116053	0.0565525	0.0645586	0.0325203	0.053327	0.0452261	0.0487805	0.0337079	0.042471
GLYMA_10G279400	GLYMA_10G279400	1.17944	0.988892	1.52674	1.27845	1.60157	2.0774	0.793157	1.12394	0.831078	1.10222	0.817257	1.28565	0.89161	1.21852	1.26662	0.531598	0.162121	0.155137	0.30719	0.15894	0.207466	0.296375	0.131258	0.205003	0.142469	0.160738	0.121951	0.141576	0.134673	0.195122	0.11236	0.100386
GLYMA_03G217100	GLYMA_03G217100	0.356106	0.216794	0.214675	0.386587	0.325272	0.226481	0.241539	0.173292	0.216411	0.139028	0.219494	0.196684	0.122088	0.0989516	0.235627	0.210956	0.0606061	0.0381485	0.0457516	0.0364238	0.0489596	0.0362473	0.0446549	0.0437804	0.0429581	0.0250329	0.0243902	0.0254837	0.0190955	0.0365854	0.0337079	0.027027
GLYMA_20G020800	GLYMA_20G020800	0.952418	1.18939	0.990557	1.85207	0.578627	0.540079	1.03658	0.942729	1.02513	0.672176	0.811219	0.585322	0.522251	0.47412	0.795668	0.798329	0.126515	0.204985	0.202614	0.188742	0.0844553	0.0852878	0.177267	0.173732	0.183252	0.109354	0.105691	0.0698443	0.0713568	0.0731707	0.101124	0.0965251
GLYMA_20G223300	GLYMA_20G223300	0.448937	0.508304	0.256577	0.399775	0.680577	1.00163	0.505323	0.531499	0.546367	0.587676	0.344194	0.72697	0.733776	0.607724	0.683787	0.356357	0.0757576	0.0874873	0.0653595	0.0463576	0.0966952	0.164179	0.0960758	0.108409	0.104948	0.0974967	0.0650407	0.0854176	0.0994975	0.121951	0.0674157	0.0617761
GLYMA_06G059800	GLYMA_06G059800	0.19885	0.194533	0.304142	0.20128	0.398265	0.38397	0.132458	0.218174	0.142988	0.137094	0.232132	0.280808	0.255521	0.125895	0.102052	0.329435	0.0318182	0.0361139	0.0653595	0.0298013	0.0605875	0.0660981	0.0351827	0.0451703	0.0293638	0.0223979	0.0406504	0.0335064	0.0371859	0.0304878	0.011236	0.0617761
GLYMA_13G159100	GLYMA_13G159100	1.51609	1.02404	1.69707	1.95051	1.00572	0.499928	0.89327	0.853768	0.793332	1.21787	1.02256	0.647	0.825015	1.04212	1.07687	0.898949	0.19697	0.176501	0.372549	0.225166	0.146267	0.08742	0.162382	0.175122	0.151169	0.193676	0.105691	0.0788108	0.131658	0.189024	0.11236	0.119691
GLYMA_17G226400	GLYMA_17G226400	0.990746	1.42162	0.735924	0.903394	1.05249	1.70132	1.23284	1.20814	1.55561	1.24297	0.938925	1.11603	1.10737	0.643602	0.436095	0.644005	0.153788	0.230417	0.196078	0.10596	0.141983	0.240938	0.201624	0.211953	0.263187	0.183136	0.146341	0.12034	0.161809	0.109756	0.0674157	0.111969
GLYMA_11G209300	GLYMA_11G209300	0.303504	0.306856	0.491961	0.266649	0.290225	0.258084	0.219384	0.324036	0.441397	0.353301	0.132139	0.302118	0.266337	0.126103	0.195742	0.214982	0.0530303	0.0656155	0.130719	0.0430464	0.0550796	0.0533049	0.0500677	0.0778318	0.0940729	0.057971	0.0243902	0.0438886	0.0472362	0.0365854	0.0337079	0.046332
GLYMA_06G202100	GLYMA_06G202100	0.896555	0.896915	0.294493	0.882697	0.877374	0.905125	0.821804	0.737657	0.81641	0.790392	1.14036	0.761744	0.776225	0.611781	0.591531	1.14876	0.12803	0.152594	0.0980392	0.0993377	0.123011	0.153518	0.151556	0.147325	0.145731	0.118577	0.154472	0.0901369	0.114573	0.134146	0.101124	0.173745
GLYMA_02G097500	GLYMA_02G097500	0.167781	0.185931	0.15549	0.4199	0.149872	0.192113	0.142126	0.234121	0.263392	0.124605	0.211036	0.210362	0.224956	0.107658	0.132978	0.354924	0.0325758	0.0417091	0.0653595	0.0331126	0.0232558	0.0383795	0.0338295	0.0542043	0.0614464	0.027668	0.0243902	0.024068	0.041206	0.0243902	0.0337079	0.0733591
GLYMA_11G017800	GLYMA_11G017800	1.41395	1.44663	1.30517	1.6354	1.52348	1.71475	1.39292	1.30793	1.87396	1.90694	1.4541	1.90397	2.19463	1.73188	0.562777	1.88017	0.180303	0.22177	0.30719	0.18543	0.19951	0.249467	0.227334	0.209173	0.301251	0.250329	0.211382	0.190656	0.274372	0.286585	0.0674157	0.243243
GLYMA_12G022500	GLYMA_12G022500	4.0612	1.9068	1.96962	1.96645	1.1029	1.32314	3.25177	2.48981	2.29605	2.3209	1.04168	1.8044	1.44727	3.33441	1.29576	1.97545	0.32803	0.252798	0.352941	0.188742	0.145043	0.159915	0.324763	0.33704	0.294725	0.243742	0.130081	0.175083	0.20402	0.414634	0.134831	0.27027
GLYMA_07G049700	GLYMA_07G049700	0.334208	0.357547	0.140564	0.252975	0.413217	0.509335	0.330379	0.409013	0.35496	0.547963	0.277182	0.46386	0.389173	0.495502	0.289364	0.316249	0.0530303	0.0534079	0.0392157	0.0264901	0.0599755	0.0831557	0.0649526	0.0743572	0.0630778	0.0816864	0.0569106	0.0509674	0.0613065	0.0792683	0.0561798	0.0617761
GLYMA_10G170500	GLYMA_10G170500	0.450197	0.5744	0.279244	0.344186	0.403762	0.530207	0.422766	0.985629	0.818489	0.309397	0.252851	0.491252	0.324045	0.54825	0.332438	0.389835	0.0598485	0.0991862	0.0522876	0.0364238	0.0599755	0.0916844	0.0811908	0.182071	0.147363	0.0461133	0.0325203	0.0561586	0.0472362	0.0914634	0.0674157	0.046332
GLYMA_20G181000	GLYMA_20G181000	0.248772	0.333683	0.295458	0.157626	0.486714	0.430962	0.297975	0.529229	0.367781	0.402094	0.545982	0.492489	0.316949	0.344096	0.613335	0.157381	0.0401515	0.0579858	0.0784314	0.0231788	0.0703794	0.0703625	0.0500677	0.104934	0.0734095	0.0737813	0.0894309	0.0542709	0.0492462	0.0853659	0.0674157	0.03861
GLYMA_13G333500	GLYMA_13G333500	0.340061	0.314232	0.449717	0.387538	0.286597	0.244496	0.136694	0.236691	0.233869	0.184581	0.115437	0.26976	0.205561	0.380637	0.183279	0.238305	0.0530303	0.0539166	0.104575	0.0430464	0.0434517	0.0319829	0.02977	0.0500347	0.0445895	0.027668	0.0243902	0.0283152	0.0351759	0.0487805	0.0337079	0.030888
GLYMA_02G206500	GLYMA_02G206500	1.45397	1.04641	0.736841	0.918769	0.417528	0.610894	1.0252	1.29372	1.62625	1.18558	0.681805	0.548059	0.566798	0.520696	1.15095	0.997112	0.190152	0.185656	0.156863	0.122517	0.0728274	0.102345	0.186739	0.237665	0.270256	0.168643	0.121951	0.0660689	0.0974874	0.103659	0.134831	0.158301
GLYMA_08G242500	GLYMA_08G242500	0.102129	0.169213	0.156737	0.168444	0.300529	0.22281	0.123859	0.132851	0.103498	0.158719	0.234774	0.119461	0.11894	0.333826	0.275383	0.0857085	0.0204545	0.0300102	0.0653595	0.0264901	0.0428397	0.0490405	0.0243572	0.0264072	0.0228385	0.027668	0.0325203	0.0141576	0.0180905	0.0670732	0.0337079	0.015444
GLYMA_07G072900	GLYMA_07G072900	0.133846	0.100189	0.039063	0.119867	0.135541	0.131467	0.0948977	0.0632963	0.0732831	0.136638	0.0923676	0.152094	0.0825219	0.067826	0.112023	0.0850537	0.019697	0.017294	0.0196078	0.0198675	0.0226438	0.021322	0.0189445	0.0138985	0.0152257	0.027668	0.0243902	0.017933	0.0140704	0.00609756	0.011236	0.023166
GLYMA_01G175700	GLYMA_01G175700	12.8364	18.7081	18.1558	22.9356	9.20037	5.89198	16.1081	15.1363	18.3226	14.7658	13.3274	12.5457	18.3899	10.9049	9.80824	19.1133	0.674242	0.804171	0.875817	0.768212	0.55814	0.460554	0.787551	0.798471	0.83143	0.719368	0.658537	0.623407	0.762814	0.682927	0.550562	0.756757
GLYMA_13G331300	GLYMA_13G331300	0.835303	0.698128	0.697276	0.473483	0.359697	0.317222	0.723868	0.626215	0.815644	0.517793	0.214762	0.68162	0.673133	0.357681	0.255658	0.290105	0.116667	0.122584	0.143791	0.0695364	0.0514076	0.0554371	0.136671	0.136206	0.170201	0.0909091	0.0406504	0.0778669	0.102513	0.0731707	0.0449438	0.046332
GLYMA_04G134900	GLYMA_04G134900	0.254449	0.290958	0.272962	0.183487	0.387374	0.167961	0.418757	0.263632	0.269603	0.245746	0.385111	0.387166	0.263546	0.156218	0.273707	0.607545	0.0439394	0.0579858	0.0915033	0.0331126	0.0599755	0.0341151	0.0784844	0.0604587	0.0598151	0.0434783	0.0487805	0.0490798	0.0462312	0.0426829	0.0224719	0.0810811
GLYMA_06G108500	GLYMA_06G108500	0.721439	0.816628	0.548837	0.870252	0.780016	0.708972	0.876624	0.726771	0.64407	0.646379	0.807509	0.775269	0.757719	0.225511	0.86258	0.748109	0.106818	0.13174	0.143791	0.10596	0.115055	0.123667	0.152909	0.134121	0.122893	0.101449	0.105691	0.0858896	0.109548	0.054878	0.0898876	0.119691
GLYMA_13G349600	GLYMA_13G349600	0.184166	0.174523	0.176219	0.124915	0.267751	0.448656	0.115418	0.213345	0.135292	0.263605	0.121958	0.247606	0.220793	0.26279	0.323639	0.118498	0.030303	0.0330621	0.0653595	0.0198675	0.0477356	0.0724947	0.0243572	0.0562891	0.0326264	0.0513834	0.0325203	0.0320906	0.0291457	0.0609756	0.0561798	0.027027
GLYMA_14G223300	GLYMA_14G223300	0.417305	0.38546	0.276175	0.267251	0.337178	0.412804	0.328633	0.342734	0.378381	0.177578	0.140204	0.424324	0.381876	0.192593	0.300907	0.544976	0.0636364	0.0747711	0.0457516	0.0264901	0.0532436	0.0746269	0.0649526	0.076442	0.0766721	0.030303	0.0325203	0.0514394	0.0562814	0.0487805	0.0337079	0.0849421
GLYMA_12G192200	GLYMA_12G192200	0.301295	0.475479	0.159473	0.260895	0.498467	0.238312	0.289004	0.360528	0.275058	0.25346	0.470902	0.354383	0.316789	0.260929	0.170695	0.619764	0.0431818	0.084944	0.0457516	0.0331126	0.0746634	0.0469083	0.0473613	0.0806115	0.0494834	0.0474308	0.0731707	0.0405852	0.0512563	0.0670732	0.0224719	0.0810811
GLYMA_06G065900	GLYMA_06G065900	2.85204	3.27983	3.9383	5.71306	2.58581	2.19317	3.45967	3.59965	3.92944	1.47027	3.117	2.09409	1.79773	4.2322	2.46082	3.49424	0.325758	0.4059	0.581699	0.483444	0.283966	0.277186	0.415426	0.47255	0.489396	0.193676	0.341463	0.199622	0.217085	0.481707	0.247191	0.3861
GLYMA_19G213700	GLYMA_19G213700	0.289548	0.128446	0.144959	0.192594	0.166533	0.161889	0.203855	0.12706	0.119869	0.133095	0.233274	0.163308	0.093027	0.19962	0.0745584	0.28291	0.0401515	0.0295015	0.0522876	0.0298013	0.0293758	0.0255864	0.0487145	0.0326616	0.0304513	0.0210804	0.0406504	0.0231241	0.0130653	0.0365854	0.011236	0.03861
GLYMA_19G200000	GLYMA_19G200000	0.452813	0.373491	0.229638	0.229684	0.194357	0.169784	0.460119	0.234566	0.502228	0.301184	0.231367	0.179927	0.286891	0.273906	0.199928	0.129332	0.0651515	0.0701933	0.0522876	0.0331126	0.0287638	0.0298507	0.0784844	0.0514246	0.0995106	0.0540184	0.0406504	0.0250118	0.0442211	0.0487805	0.011236	0.034749
GLYMA_10G273100	GLYMA_10G273100	0.402342	0.437108	0.77358	0.520929	0.518826	0.954033	0.61827	0.325311	0.341877	0.245685	0.39192	0.529218	0.255113	0.279787	0.832016	0.596943	0.0628788	0.0737538	0.176471	0.0695364	0.0850673	0.151386	0.0947226	0.076442	0.0630778	0.0342556	0.0569106	0.0585182	0.0442211	0.054878	0.0561798	0.0926641
GLYMA_13G124600	GLYMA_13G124600	0.694251	0.508223	0.607042	0.877284	0.33591	0.235608	0.39621	0.374228	0.326625	0.544493	0.914523	0.392403	0.385955	0.492678	0.275485	0.317858	0.0969697	0.08647	0.163399	0.0993377	0.0556916	0.0447761	0.0690122	0.085476	0.05764	0.083004	0.0894309	0.0500236	0.0522613	0.0914634	0.0449438	0.046332
GLYMA_05G241500	GLYMA_05G241500	0.320582	0.337192	0.314785	0.415566	0.440451	0.454531	0.405447	0.346673	0.356725	0.358939	0.306366	0.407882	0.456683	0.476372	1.18903	0.427943	0.0492424	0.0574771	0.0784314	0.0629139	0.0636475	0.0895522	0.0757781	0.0722724	0.0657966	0.057971	0.0650407	0.053327	0.0703518	0.0853659	0.168539	0.0810811
GLYMA_13G208600	GLYMA_13G208600	0.158927	0.0795761	0.211903	0.161672	0.24406	0.157263	0.0925669	0.153616	0.0935425	0.124625	0.062888	0.207182	0.159207	0.0831925	0.193184	0.22414	0.0265152	0.0162767	0.0522876	0.0165563	0.0391677	0.0255864	0.0175913	0.0333565	0.0201196	0.0210804	0.0162602	0.0268995	0.0241206	0.0304878	0.0224719	0.03861
GLYMA_17G121600	GLYMA_17G121600	2.28499	1.89656	1.03601	4.02009	2.01507	2.01018	2.07737	1.59647	1.66207	1.29988	2.07232	2.12363	1.79585	1.84093	2.87693	2.30972	0.251515	0.268566	0.235294	0.301325	0.238066	0.257996	0.292287	0.266852	0.258293	0.179183	0.235772	0.210477	0.217085	0.219512	0.235955	0.27027
GLYMA_07G016700	GLYMA_07G016700	0.20062	0.329788	0.30182	0.217476	0.522225	0.621674	0.3156	0.434897	0.290424	0.358873	0.41032	0.652386	0.422644	0.168193	0.299952	0.379116	0.0356061	0.0600203	0.104575	0.0331126	0.0764994	0.0959488	0.0744249	0.0993746	0.0609027	0.0606061	0.0487805	0.0806984	0.0572864	0.0365854	0.0337079	0.0617761
GLYMA_07G170200	GLYMA_07G170200	2.46956	4.19694	2.04605	3.04283	2.0341	1.26532	3.24911	3.33515	4.90729	3.23976	1.75895	2.65723	3.61094	3.06257	1.45222	2.84879	0.297727	0.485249	0.411765	0.278146	0.25153	0.172708	0.419486	0.466991	0.539424	0.371542	0.268293	0.253893	0.364824	0.353659	0.157303	0.320463
GLYMA_16G035100	GLYMA_16G035100	0.638579	0.977797	0.331942	0.598961	0.836843	0.80633	0.892999	0.599393	0.950112	1.09788	0.555449	0.751885	0.928969	0.51948	0.283107	0.800719	0.0962121	0.155137	0.0849673	0.0728477	0.118727	0.130064	0.140731	0.109104	0.165307	0.155468	0.113821	0.0910807	0.145729	0.115854	0.0449438	0.111969
GLYMA_17G229100	GLYMA_17G229100	1.18815	1.4851	3.70351	3.39985	1.83824	2.04848	1.16429	1.52736	0.990309	0.955145	1.01796	1.3871	1.13864	1.55993	1.32286	1.19639	0.164394	0.217192	0.522876	0.298013	0.225214	0.264392	0.188092	0.255733	0.158782	0.144928	0.146341	0.151487	0.149749	0.286585	0.168539	0.166023
GLYMA_08G329100	GLYMA_08G329100	5.77102	6.82493	3.04612	2.47501	6.07223	6.03581	5.16609	7.24389	9.59622	6.60539	4.19289	8.66097	7.86724	6.50774	5.56195	5.79766	0.487879	0.596643	0.45098	0.238411	0.48164	0.520256	0.507442	0.658096	0.744426	0.546772	0.357724	0.53799	0.601005	0.579268	0.494382	0.509653
GLYMA_07G187300	GLYMA_07G187300	0.19891	0.242539	0.190136	0.13659	0.258744	0.404106	0.238205	0.221684	0.219986	0.23887	0.427937	0.294529	0.196964	0.360408	0.11038	0.211232	0.030303	0.0447609	0.0457516	0.0198675	0.0495716	0.0554371	0.0473613	0.0514246	0.0445895	0.0355731	0.0569106	0.0377537	0.0341709	0.0731707	0.0224719	0.046332
GLYMA_09G178500	GLYMA_09G178500	0.14435	0.141024	0.151059	0.216999	0.195985	0.184026	0.154975	0.154842	0.196524	0.0878954	0.3188	0.255514	0.242227	0.293563	0.0822301	0.174061	0.0257576	0.0279756	0.0392157	0.0264901	0.0287638	0.0319829	0.0365359	0.0416956	0.045677	0.0197628	0.0487805	0.0283152	0.0351759	0.054878	0.0224719	0.046332
GLYMA_20G074500	GLYMA_20G074500	1.24323	1.42583	1.03261	1.36606	1.25275	1.50136	1.82293	1.70114	1.70901	1.73323	1.57044	1.45204	1.3167	1.02862	3.98751	2.36243	0.17803	0.224313	0.196078	0.135762	0.165239	0.215352	0.282815	0.289785	0.282762	0.245059	0.219512	0.158093	0.18191	0.20122	0.303371	0.297297
GLYMA_09G169500	GLYMA_09G169500	0.679362	1.02741	0.545148	0.790737	0.798935	0.85947	1.60705	0.960036	2.11273	1.27937	0.707354	0.96314	1.40342	0.938841	1.06378	0.841486	0.0962121	0.166328	0.143791	0.0927152	0.107099	0.138593	0.23816	0.169562	0.312126	0.180501	0.113821	0.112317	0.175879	0.164634	0.11236	0.135135
GLYMA_11G181900	GLYMA_11G181900	0.0656321	0.144396	0.144686	0.144857	0.180422	0.178271	0.212727	0.117096	0.139322	0.0646944	0.250587	0.11914	0.0898638	0.0797468	0.214076	0.118516	0.0121212	0.0300102	0.0326797	0.0264901	0.0287638	0.0341151	0.0433018	0.0243224	0.0271887	0.0144928	0.0325203	0.0160453	0.0120603	0.0304878	0.0224719	0.015444
GLYMA_18G245200	GLYMA_18G245200	0.974357	0.915583	0.595497	0.598897	0.987481	1.31672	0.846641	1.19844	0.805903	0.820957	0.437107	1.69307	1.09516	0.850016	1.68842	1.13903	0.140909	0.163784	0.117647	0.0794702	0.140759	0.202559	0.165088	0.220292	0.149538	0.13307	0.0650407	0.181218	0.152764	0.176829	0.179775	0.166023
GLYMA_13G339200	GLYMA_13G339200	0.229053	0.327889	0.315878	0.240389	0.407616	0.260441	0.425395	0.33865	0.377263	0.267451	0.389968	0.472391	0.441903	0.363654	0.137298	0.531675	0.0401515	0.0600203	0.0849673	0.0264901	0.0654835	0.0490405	0.0852503	0.0715775	0.0674279	0.0487484	0.0650407	0.0566305	0.0582915	0.109756	0.0337079	0.0965251
GLYMA_11G079200	GLYMA_11G079200	0.738381	0.739585	0.329544	0.737152	0.673577	0.685328	1.09402	0.8117	1.27599	0.917644	0.64508	0.781674	0.870883	0.614061	0.516565	0.823835	0.101515	0.126144	0.111111	0.089404	0.0954712	0.121535	0.181326	0.14524	0.210984	0.135705	0.105691	0.0910807	0.117588	0.152439	0.0898876	0.123552
GLYMA_08G002900	GLYMA_08G002900	0.192849	0.243414	0.398451	0.229495	0.159778	0.19431	0.419426	0.239178	0.273513	0.275952	0.174364	0.181504	0.258652	0.248763	0.10833	0.154635	0.0340909	0.0427263	0.111111	0.0298013	0.0287638	0.0447761	0.0784844	0.0548992	0.0538336	0.055336	0.0325203	0.0264276	0.0472362	0.0731707	0.0224719	0.027027
GLYMA_01G228500	GLYMA_01G228500	0.207719	0.176849	0.271198	0.0700522	0.197417	0.215949	0.208678	0.179087	0.190011	0.205236	0.0899792	0.146957	0.162487	0.0767262	0.247777	0.218462	0.0378788	0.0340793	0.0653595	0.00993377	0.0305998	0.0319829	0.0433018	0.0465601	0.0353453	0.0342556	0.0243902	0.0207645	0.0271357	0.0243902	0.0224719	0.03861
GLYMA_06G171200	GLYMA_06G171200	0.210812	0.077945	0.278225	0.181942	0.220904	0.202163	0.167182	0.152653	0.132891	0.22213	0.0952	0.163701	0.230425	0.183208	0.221329	0.301749	0.0393939	0.0152594	0.0915033	0.0331126	0.0348837	0.0298507	0.0392422	0.0333565	0.0320827	0.0355731	0.00813008	0.0207645	0.038191	0.0426829	0.0337079	0.0501931
GLYMA_18G274000	GLYMA_18G274000	0.718864	1.05629	1.40352	0.911242	0.446892	0.431843	0.747043	0.844609	1.0666	0.527708	1.04417	0.706388	0.597126	1.67169	1.09529	0.791239	0.115909	0.180061	0.287582	0.10596	0.0673195	0.0703625	0.152909	0.181376	0.207178	0.0869565	0.162602	0.0901369	0.0894472	0.292683	0.123596	0.123552
GLYMA_12G117600	GLYMA_12G117600	0.499532	0.513838	0.505981	0.5046	0.795144	0.777624	0.680908	0.396989	0.420822	0.532606	0.58401	0.738076	0.52389	0.470079	1.53639	0.58548	0.0742424	0.0824008	0.117647	0.0629139	0.104651	0.119403	0.125846	0.076442	0.0842849	0.0843215	0.0813008	0.0816423	0.078392	0.109756	0.157303	0.0888031
GLYMA_15G097000	GLYMA_15G097000	1.39522	0.890803	0.667325	0.779535	0.749564	0.713804	1.09288	0.696639	0.667403	0.848611	1.08344	0.911598	0.685936	0.688798	0.360532	0.983848	0.173485	0.156155	0.176471	0.0960265	0.113831	0.10661	0.192152	0.128562	0.121805	0.130435	0.154472	0.109014	0.0984925	0.146341	0.0449438	0.142857
GLYMA_09G078400	GLYMA_09G078400	0.244158	0.204201	0.225521	0.133312	0.256399	0.275263	0.202175	0.1546	0.170058	0.164732	0.0745195	0.283698	0.237608	0.205568	0.288247	0.16962	0.0386364	0.0376399	0.0326797	0.0198675	0.0403917	0.0511727	0.0419486	0.0340514	0.0348015	0.0289855	0.00813008	0.0330345	0.0321608	0.0426829	0.0337079	0.03861
GLYMA_20G150900	GLYMA_20G150900	0.437901	0.323477	0.18137	0.414867	0.382016	0.475351	0.506207	0.360895	0.259796	0.327057	0.425538	0.332623	0.386513	0.381837	0.70153	0.499974	0.0719697	0.0620549	0.0522876	0.0562914	0.0593635	0.0788913	0.0920162	0.0708826	0.0549212	0.0447958	0.0569106	0.0429448	0.0683417	0.0853659	0.0674157	0.108108
GLYMA_13G187200	GLYMA_13G187200	0.537113	0.579475	0.26805	0.655585	0.63521	0.581831	0.89538	0.619996	0.704977	0.667218	0.778248	0.622449	0.634455	0.444557	0.967196	1.0368	0.0810606	0.104273	0.0653595	0.0827815	0.0991432	0.0938166	0.150203	0.124392	0.138662	0.0935441	0.097561	0.0769231	0.104523	0.103659	0.11236	0.150579
GLYMA_19G221300	GLYMA_19G221300	0.46421	0.462913	0.441054	0.367785	0.433112	0.154199	0.380577	0.531097	0.596385	0.500753	0.478936	0.553389	0.505756	0.463237	0.179672	0.24353	0.0757576	0.0869786	0.143791	0.0629139	0.0728274	0.0277186	0.0717185	0.114663	0.116368	0.0803689	0.0731707	0.0641812	0.0713568	0.0914634	0.0337079	0.0501931
GLYMA_01G099100	GLYMA_01G099100	0.151492	0.100878	0.0875493	0.278161	0.244454	0.28987	0.189536	0.1269	0.131556	0.22203	0.338585	0.203186	0.182658	0.285139	0.0950918	0.187974	0.025	0.0203459	0.0326797	0.0331126	0.0354957	0.0426439	0.0365359	0.0264072	0.0282762	0.0355731	0.0325203	0.0278433	0.0241206	0.0487805	0.0224719	0.019305
GLYMA_02G009200	GLYMA_02G009200	0.622345	0.504146	0.202644	0.747608	0.568981	0.44936	0.51783	0.735236	0.561544	0.474469	0.478593	0.78036	0.511569	0.652102	0.78363	0.516691	0.0886364	0.0859613	0.0392157	0.0827815	0.0764994	0.0810235	0.100135	0.150104	0.103861	0.0711462	0.0731707	0.0877773	0.078392	0.115854	0.0674157	0.0772201
GLYMA_02G240700	GLYMA_02G240700	0.117541	0.140883	0.231728	0.132828	0.280117	0.160242	0.182451	0.193741	0.205306	0.198477	0.0873263	0.188462	0.163582	0.114215	0.337645	0.147643	0.0212121	0.0295015	0.0588235	0.0198675	0.0452876	0.0319829	0.037889	0.0458652	0.0451332	0.0355731	0.00813008	0.0273714	0.0271357	0.0243902	0.0337079	0.023166
GLYMA_11G053500	GLYMA_11G053500	0.855328	0.609998	0.81993	0.449578	1.60763	1.73771	0.697522	0.893636	0.841729	1.26893	0.720126	1.38253	1.07041	0.724952	0.824519	0.923562	0.124242	0.106307	0.222222	0.0695364	0.20563	0.230277	0.136671	0.160528	0.1441	0.172596	0.097561	0.15243	0.138693	0.146341	0.11236	0.150579
GLYMA_08G051900	GLYMA_08G051900	0.131853	0.209625	0.50962	0.222054	0.378839	0.313047	0.139933	0.267758	0.187531	0.2033	0.162166	0.432107	0.227695	0.134082	0.199043	0.266949	0.0257576	0.0386572	0.143791	0.0331126	0.0599755	0.0469083	0.037889	0.0618485	0.0402393	0.0368906	0.0325203	0.053799	0.041206	0.0304878	0.011236	0.042471
GLYMA_04G001700	GLYMA_04G001700	0.420466	1.15366	0.412758	0.745198	0.596641	0.54561	1.0722	0.494339	0.778422	0.29863	0.641932	0.417992	0.347335	0.487772	0.974276	0.764874	0.0704545	0.185148	0.104575	0.10596	0.102203	0.0916844	0.207037	0.108409	0.1441	0.0487484	0.121951	0.0523832	0.0522613	0.0731707	0.0786517	0.111969
GLYMA_17G175900	GLYMA_17G175900	0.814915	0.71815	0.673355	0.883825	0.758145	0.520188	1.04433	0.696866	0.672139	0.835433	0.43159	0.594207	0.666787	1.38454	0.358464	0.512623	0.130303	0.129705	0.20915	0.10596	0.114443	0.110874	0.20839	0.149409	0.136487	0.131752	0.0731707	0.0759792	0.103518	0.243902	0.0561798	0.0965251
GLYMA_20G040300	GLYMA_20G040300	0.360328	0.300106	0.126164	0.203426	0.269871	0.207086	0.267535	0.326715	0.398305	0.38546	0.388805	0.397961	0.360743	0.284818	0.487259	0.21186	0.0568182	0.0528993	0.0392157	0.0264901	0.0434517	0.0362473	0.052774	0.0687978	0.0831974	0.0619236	0.0569106	0.0500236	0.0572864	0.0609756	0.0561798	0.042471
GLYMA_16G122200	GLYMA_16G122200	0.404521	0.485711	0.150776	0.480196	0.372138	0.293446	0.413345	0.513421	0.582277	0.355137	0.294367	0.321467	0.495683	0.372681	0.243128	0.256163	0.0636364	0.0879959	0.0784314	0.0728477	0.0685435	0.0554371	0.0852503	0.109104	0.111474	0.0632411	0.0243902	0.0467202	0.0834171	0.0853659	0.0337079	0.0540541
GLYMA_08G104700	GLYMA_08G104700	0.0894311	0.171881	0.112453	0.0980045	0.112925	0.196633	0.0730698	0.16434	0.137696	0.0896631	0.129355	0.238575	0.20097	0.061777	0.183726	0.0659109	0.0159091	0.0254323	0.0392157	0.00993377	0.0189718	0.0383795	0.0162382	0.028492	0.0244698	0.0184453	0.0243902	0.0273714	0.0311558	0.0121951	0.0224719	0.00772201
GLYMA_20G021900	GLYMA_20G021900	1.5005	1.55314	0.705953	1.34409	1.65211	2.4166	2.72598	1.24791	2.10501	1.88281	2.30086	1.79389	1.87138	0.78892	0.960263	1.31362	0.19697	0.243642	0.189542	0.135762	0.194002	0.313433	0.365359	0.230021	0.318651	0.262187	0.243902	0.192544	0.258291	0.152439	0.123596	0.200772
GLYMA_10G192300	GLYMA_10G192300	0.345102	0.343529	0.383189	0.159523	0.50683	0.615855	0.299107	0.345069	0.399247	0.329184	0.17176	0.502422	0.363818	0.419298	0.528162	0.243187	0.0522727	0.0584944	0.0784314	0.0264901	0.0795594	0.0959488	0.0622463	0.0750521	0.0750408	0.057971	0.0325203	0.0556866	0.0572864	0.0731707	0.0786517	0.0617761
GLYMA_13G064300	GLYMA_13G064300	0.312403	0.140162	0.37198	0.212188	0.263579	0.276267	0.153976	0.202329	0.096379	0.193788	0.28983	0.217273	0.365436	0.147715	0.174743	0.16457	0.0454545	0.025941	0.0915033	0.0397351	0.0385557	0.0362473	0.0270636	0.0423905	0.0222947	0.0368906	0.0487805	0.0268995	0.0432161	0.0243902	0.011236	0.023166
GLYMA_04G129000	GLYMA_04G129000	0.462047	0.607765	0.195485	0.307574	0.392787	0.477173	0.725554	0.604155	0.703521	0.492846	0.188011	0.578911	0.501204	0.469172	0.536481	0.420801	0.0704545	0.109868	0.0653595	0.0496689	0.0667075	0.0788913	0.142084	0.114663	0.134312	0.085639	0.0243902	0.0670127	0.0773869	0.0914634	0.101124	0.0694981
GLYMA_09G177600	GLYMA_09G177600	0.606902	0.586523	0.203777	0.705661	0.667562	0.345143	0.66257	0.409977	0.570734	0.563378	0.392446	0.655682	0.588334	0.453279	0.365274	0.182922	0.0893939	0.0981689	0.0588235	0.0860927	0.100979	0.0639659	0.11502	0.0910354	0.113105	0.0922266	0.0650407	0.0788108	0.0964824	0.0853659	0.0674157	0.030888
GLYMA_05G047400	GLYMA_05G047400	1.0205	0.941107	1.17981	0.79584	0.994282	0.873761	0.949723	1.09109	0.699063	0.631237	1.47759	0.9826	0.945532	0.935728	0.383216	0.999069	0.15	0.160224	0.20915	0.0960265	0.149327	0.136461	0.156969	0.207088	0.131593	0.0988142	0.178862	0.109486	0.147739	0.152439	0.0674157	0.15444
GLYMA_13G310900	GLYMA_13G310900	1.07765	0.749323	0.9831	0.525057	0.37228	0.319808	0.730562	0.624267	0.577321	0.700521	0.432334	0.438393	0.566007	0.406871	0.279526	0.838041	0.143939	0.112411	0.163399	0.0827815	0.0501836	0.0533049	0.117727	0.111883	0.107667	0.0909091	0.0569106	0.0556866	0.0763819	0.0792683	0.0337079	0.135135
GLYMA_09G165000	GLYMA_09G165000	0.293259	0.279489	0.237788	0.320416	0.472605	0.315232	0.185966	0.181536	0.1304	0.216945	0.150086	0.264102	0.172208	0.177522	0.273152	0.122631	0.0454545	0.0554425	0.0457516	0.0397351	0.0734394	0.0597015	0.0433018	0.0437804	0.0304513	0.0355731	0.0325203	0.0344502	0.0261307	0.0365854	0.0449438	0.030888
GLYMA_16G097600	GLYMA_16G097600	0.22375	0.249429	0.252119	0.265744	0.388559	0.475496	0.269848	0.183031	0.200368	0.206017	0.269734	0.224772	0.220804	0.123448	0.309883	0.289996	0.0401515	0.0493388	0.0588235	0.0331126	0.0636475	0.0724947	0.052774	0.047255	0.0467645	0.0368906	0.0569106	0.0283152	0.0361809	0.0487805	0.0337079	0.0501931
GLYMA_04G256600	GLYMA_04G256600	0.480686	0.464474	0.148159	0.415242	0.390489	0.346355	0.475404	0.453806	0.57065	0.556293	0.257191	0.469553	0.497792	0.29321	0.27211	0.211188	0.0772727	0.093591	0.0588235	0.0463576	0.0673195	0.0660981	0.102842	0.102849	0.110386	0.0974967	0.0650407	0.0608778	0.0824121	0.0487805	0.0337079	0.0501931
GLYMA_11G080600	GLYMA_11G080600	0.80091	0.727197	0.63845	0.760907	0.80336	0.607909	1.13958	0.553652	0.750942	0.668856	0.709508	0.607645	0.49468	0.325331	0.29608	0.304149	0.129545	0.115463	0.124183	0.0728477	0.115667	0.102345	0.173207	0.109104	0.119086	0.106719	0.0650407	0.0698443	0.080402	0.0670732	0.0449438	0.0579151
GLYMA_13G312400	GLYMA_13G312400	0.473968	0.564148	0.312126	0.428127	0.374299	0.235419	0.434813	0.361982	0.511211	0.410587	0.251847	0.506708	0.409269	0.231386	0.146577	0.400461	0.0795455	0.0946083	0.0915033	0.0529801	0.0587515	0.0554371	0.0838972	0.0715775	0.0929853	0.0645586	0.0487805	0.0618216	0.0613065	0.0487805	0.0337079	0.0926641
GLYMA_02G216000	GLYMA_02G216000	1.06579	1.0412	0.739051	0.404505	1.02701	1.09346	0.987963	0.907079	1.26384	1.13102	1.55681	1.11218	1.23886	0.684656	1.19727	1.09811	0.153788	0.171923	0.176471	0.0562914	0.143207	0.172708	0.182679	0.181376	0.22621	0.167325	0.162602	0.122699	0.163819	0.207317	0.134831	0.185328
GLYMA_02G275500	GLYMA_02G275500	0.21633	0.247287	0.175647	0.23846	0.235858	0.159559	0.348933	0.350002	0.282003	0.434225	0.112845	0.2931	0.198126	0.358965	0.193555	0.222266	0.0310606	0.0493388	0.0326797	0.0298013	0.0379437	0.0341151	0.0879567	0.076442	0.0565525	0.0711462	0.0325203	0.0325625	0.0311558	0.0792683	0.0224719	0.046332
GLYMA_16G014400	GLYMA_16G014400	0.468354	0.431343	0.660149	0.685208	0.524501	0.342539	0.502383	0.414967	0.359618	0.501223	0.28659	0.389339	0.448762	0.249628	0.178092	0.414574	0.0787879	0.0783316	0.196078	0.0960265	0.0813953	0.0660981	0.101488	0.0938151	0.0728657	0.0869565	0.0406504	0.0490798	0.0753769	0.0609756	0.0337079	0.0694981
GLYMA_15G054900	GLYMA_15G054900	0.227498	0.259885	0.11914	0.0854356	0.221754	0.218717	0.230982	0.15997	0.268563	0.199003	0.255001	0.280756	0.206442	0.072998	0.174115	0.172143	0.0371212	0.051882	0.0522876	0.013245	0.0318237	0.0511727	0.0514208	0.0312717	0.0549212	0.0316206	0.0406504	0.0339783	0.0361809	0.0182927	0.0337079	0.034749
GLYMA_01G178200	GLYMA_01G178200	0.335744	0.270554	0.430094	0.231334	0.259006	0.211073	0.627284	0.457958	0.652668	0.2047	0.26629	0.275391	0.25364	0.169766	0.287018	0.611394	0.0530303	0.051882	0.0653595	0.0231788	0.0391677	0.0362473	0.110961	0.0903405	0.113105	0.0342556	0.0406504	0.0339783	0.0361809	0.0426829	0.0449438	0.100386
GLYMA_10G091000	GLYMA_10G091000	3.33311	3.71439	3.20836	3.66353	4.00077	3.07475	3.52326	4.45807	3.50035	6.01457	6.12896	3.44535	3.02006	1.59518	2.66766	1.74464	0.359091	0.440997	0.535948	0.31457	0.390453	0.36887	0.445196	0.517721	0.442088	0.536232	0.487805	0.308164	0.329648	0.213415	0.258427	0.216216
GLYMA_05G087300	GLYMA_05G087300	0.106303	0.136399	0.267481	0.159457	0.172408	0.161042	0.182567	0.185832	0.139565	0.15009	0.138161	0.109684	0.161827	0.131632	0.408379	0.207661	0.019697	0.0274669	0.0980392	0.0231788	0.0293758	0.0341151	0.0460081	0.047255	0.0342577	0.0289855	0.0406504	0.0146295	0.0281407	0.0426829	0.0337079	0.034749
GLYMA_U004700	GLYMA_U004700	0.158397	0.22117	0.087777	0.107085	0.210288	0.173035	0.197761	0.275592	0.266155	0.3369	0.292708	0.26917	0.26769	0.210675	0.15845	0.129668	0.030303	0.0503561	0.0392157	0.00993377	0.0391677	0.0405117	0.0581867	0.0590688	0.0663404	0.0592885	0.0406504	0.0377537	0.0452261	0.0426829	0.0224719	0.023166
GLYMA_08G146000	GLYMA_08G146000	0.224588	0.227288	0.158502	0.20821	0.228812	0.461275	0.289518	0.254241	0.202373	0.447838	0.232823	0.544662	0.292789	0.2029	0.493981	0.141914	0.0356061	0.0412004	0.0588235	0.0231788	0.0354957	0.0767591	0.052774	0.0548992	0.0353453	0.0658762	0.0243902	0.0622935	0.0452261	0.0670732	0.0674157	0.03861
GLYMA_17G002400	GLYMA_17G002400	1.20943	1.07441	0.34285	0.361168	1.24134	1.11989	0.784145	1.31575	1.24768	0.915627	0.514738	1.28871	1.09994	0.366009	0.35171	0.515797	0.165152	0.179044	0.0392157	0.0364238	0.157895	0.179104	0.139378	0.216817	0.199565	0.134387	0.097561	0.131194	0.144724	0.0853659	0.0337079	0.0849421
GLYMA_20G064400	GLYMA_20G064400	0.297725	0.269218	0.10269	0.232255	0.35197	0.213246	0.373371	0.296376	0.286719	0.248415	0.272833	0.393944	0.319665	0.281939	0.189632	0.126052	0.0462121	0.051882	0.0261438	0.0298013	0.0569155	0.0426439	0.0838972	0.0604587	0.0641653	0.0474308	0.0406504	0.0453044	0.0522613	0.054878	0.0337079	0.027027
GLYMA_04G225900	GLYMA_04G225900	1.36411	1.62257	0.562726	1.19398	1.25924	1.78268	1.11621	1.09035	1.11493	1.67856	1.70789	2.15844	1.95689	1.79951	1.76073	1.21074	0.170455	0.228891	0.130719	0.152318	0.141983	0.226013	0.167794	0.169562	0.175639	0.201581	0.203252	0.210949	0.245226	0.27439	0.168539	0.173745
GLYMA_04G080000	GLYMA_04G080000	0.369349	0.563475	1.416	0.415638	0.824718	0.642057	0.558049	0.53497	0.481752	0.646508	0.589893	0.653326	0.64752	0.767913	0.942177	0.540389	0.0575758	0.0905392	0.300654	0.0496689	0.120563	0.102345	0.097429	0.102154	0.0918978	0.0909091	0.0813008	0.0811704	0.105528	0.164634	0.0786517	0.0772201
GLYMA_15G066600	GLYMA_15G066600	0.165642	0.189781	0.266248	0.169965	0.177284	0.268383	0.168934	0.139514	0.146506	0.203816	0.180905	0.145852	0.164332	0.232788	0.298641	0.0779223	0.0287879	0.0300102	0.0784314	0.0298013	0.0257038	0.0511727	0.0392422	0.0361362	0.0304513	0.0329381	0.0243902	0.0212364	0.0261307	0.054878	0.0337079	0.015444
GLYMA_20G210500	GLYMA_20G210500	0.179526	0.30847	0.688023	0.682955	0.518652	0.407017	0.265757	0.506001	0.571645	0.22486	0.317744	0.422832	0.351227	0.320641	0.250096	0.286885	0.0234848	0.0544252	0.130719	0.0629139	0.0783354	0.0724947	0.0500677	0.0945101	0.0821098	0.0316206	0.0406504	0.0486078	0.0522613	0.054878	0.0449438	0.03861
GLYMA_20G214100	GLYMA_20G214100	0.389938	0.383074	0.709105	0.244509	0.471748	0.358382	0.508614	0.349753	0.596369	0.185031	0.303163	0.354254	0.232223	0.474289	0.281887	0.345723	0.0583333	0.0620549	0.196078	0.0364238	0.0636475	0.0810235	0.0947226	0.0681028	0.115824	0.027668	0.0487805	0.0424729	0.0341709	0.0914634	0.0449438	0.0501931
GLYMA_09G030400	GLYMA_09G030400	0.274363	0.219519	0.483936	0.364491	0.823337	0.638762	0.314698	0.308963	0.226013	0.346304	0.350829	0.468365	0.304817	0.841066	0.397584	0.493971	0.0477273	0.0452696	0.163399	0.0397351	0.118727	0.121535	0.0595399	0.0687978	0.0440457	0.0513834	0.0487805	0.0571024	0.0512563	0.207317	0.0561798	0.0888031
GLYMA_08G113100	GLYMA_08G113100	0.178067	0.153185	0.0908241	0.137524	0.33292	0.276967	0.118631	0.17115	0.151227	0.116775	0.214628	0.27632	0.122904	0.2192	0.0868983	0.201762	0.0310606	0.0356053	0.0457516	0.0264901	0.0526316	0.0575693	0.0257104	0.0389159	0.0331702	0.0184453	0.0243902	0.0335064	0.0241206	0.0304878	0.011236	0.027027
GLYMA_10G294300	GLYMA_10G294300	0.245347	0.157411	0.090792	0.158739	0.257598	0.320067	0.274495	0.136189	0.174634	0.149997	0.220602	0.211487	0.15761	0.347668	0.167701	0.206432	0.0310606	0.0295015	0.0392157	0.0231788	0.0403917	0.0639659	0.0460081	0.0326616	0.0320827	0.0210804	0.0325203	0.0264276	0.0291457	0.0670732	0.011236	0.042471
GLYMA_07G041500	GLYMA_07G041500	0.279121	0.240502	0.247644	0.330515	0.473841	0.355077	0.390135	0.26782	0.286152	0.466534	0.291334	0.401256	0.400363	0.267241	0.134324	0.514207	0.0462121	0.0442523	0.0784314	0.0331126	0.0764994	0.0703625	0.0744249	0.0576789	0.050571	0.0698287	0.0406504	0.047664	0.0663317	0.0365854	0.0224719	0.0617761
GLYMA_20G246400	GLYMA_20G246400	0.350454	0.380973	0.13913	0.221829	0.176303	0.147962	0.209775	0.24462	0.282309	0.183898	0.24116	0.185131	0.256672	0.133561	0.0995213	0.157744	0.0545455	0.0686673	0.0326797	0.0298013	0.0281518	0.0341151	0.0487145	0.056984	0.0581838	0.027668	0.0487805	0.0254837	0.038191	0.0243902	0.011236	0.034749
GLYMA_15G230700	GLYMA_15G230700	0.11599	0.0670696	0.0617167	0.0683338	0.193725	0.20221	0.113574	0.1514	0.137274	0.236241	0.0965003	0.151809	0.102236	0.0682332	0.132406	0.0903999	0.0151515	0.0116989	0.0130719	0.00993377	0.0318237	0.0383795	0.0202977	0.0319666	0.0261011	0.0316206	0.0162602	0.0169891	0.0180905	0.0243902	0.0224719	0.019305
GLYMA_15G230600	GLYMA_15G230600	1.06835	0.772366	0.802288	0.732814	1.51307	1.61374	0.731307	1.16891	0.811765	0.943255	0.762779	1.38733	0.785789	1.81833	0.85472	0.475153	0.157576	0.126144	0.215686	0.0960265	0.20257	0.228145	0.131258	0.226546	0.148994	0.135705	0.113821	0.155734	0.121608	0.256098	0.11236	0.0772201
GLYMA_06G188800	GLYMA_06G188800	0.189474	0.205935	0.196621	0.102553	0.22376	0.10922	0.0866583	0.151028	0.112438	0.085183	0.325856	0.141394	0.142506	0.10634	0.166984	0.151104	0.0340909	0.0483215	0.0588235	0.0165563	0.0397797	0.0234542	0.0243572	0.038221	0.0266449	0.0223979	0.0487805	0.0184049	0.0291457	0.0365854	0.0224719	0.019305
GLYMA_13G254500	GLYMA_13G254500	0.769944	0.662121	0.912243	0.648722	0.902133	0.71614	0.357182	0.751061	0.381112	0.509676	0.719649	0.756666	0.572657	0.505498	0.238475	0.568083	0.109091	0.107833	0.196078	0.0827815	0.134027	0.117271	0.0744249	0.133426	0.0728657	0.0790514	0.0894309	0.0858896	0.080402	0.109756	0.0449438	0.0926641
GLYMA_08G171700	GLYMA_08G171700	0.60036	0.634958	0.485377	0.531269	0.566096	0.453481	0.574443	0.63514	1.00405	0.585567	0.626022	0.558716	0.365195	0.454758	0.262553	0.617374	0.0931818	0.114954	0.137255	0.0860927	0.0942472	0.0852878	0.123139	0.14385	0.180533	0.101449	0.0731707	0.07126	0.0613065	0.0670732	0.0449438	0.108108
GLYMA_19G155000	GLYMA_19G155000	0.182789	0.234386	0.110671	0.271194	0.423218	0.176519	0.325079	0.23612	0.206101	0.151029	0.34822	0.326103	0.256466	0.28522	0.355976	0.310933	0.0295455	0.0381485	0.0457516	0.0397351	0.0630355	0.0405117	0.0514208	0.0514246	0.0391517	0.0316206	0.0569106	0.0372817	0.0432161	0.0670732	0.0337079	0.0656371
GLYMA_06G211500	GLYMA_06G211500	0.578796	0.592886	0.279836	0.476593	0.562678	0.848203	0.401902	0.485497	0.471047	0.635195	0.605028	0.660307	0.344514	0.5831	0.632229	0.221814	0.0863636	0.0961343	0.0718954	0.0728477	0.0777234	0.144989	0.067659	0.101459	0.0810223	0.0909091	0.0650407	0.0778669	0.0592965	0.109756	0.0786517	0.046332
GLYMA_12G143400	GLYMA_12G143400	1.45832	1.19867	0.649925	0.672105	1.97502	1.89952	0.892773	1.87375	1.18929	1.73244	1.84671	2.48521	1.63177	1.90973	0.92481	1.30328	0.192424	0.187691	0.150327	0.0927152	0.246022	0.272921	0.165088	0.300208	0.209897	0.234519	0.203252	0.25059	0.221106	0.310976	0.0898876	0.196911
GLYMA_10G284900	GLYMA_10G284900	0.352361	0.277571	0.279021	0.513128	0.274297	0.396365	0.49452	0.240174	0.289637	0.179165	0.22991	0.354788	0.364781	0.685078	0.211393	0.304864	0.0651515	0.0539166	0.0849673	0.0695364	0.0514076	0.0746269	0.0933694	0.0597637	0.0630778	0.0316206	0.0162602	0.0410571	0.0582915	0.115854	0.0337079	0.0656371
GLYMA_16G176200	GLYMA_16G176200	1.20636	1.42681	0.542193	0.876627	0.761442	0.373162	0.920795	1.00413	1.36877	0.75091	0.576795	0.870422	0.808065	0.476781	0.798114	0.733568	0.166667	0.217701	0.189542	0.112583	0.103427	0.0810235	0.154263	0.18902	0.230016	0.118577	0.105691	0.0957999	0.115578	0.0731707	0.11236	0.100386
GLYMA_11G085100	GLYMA_11G085100	0.36347	0.253902	0.572675	0.265212	0.517845	0.550416	0.272283	0.286322	0.233838	0.249997	0.244928	0.381184	0.280503	0.518538	0.893986	0.405122	0.0590909	0.0478128	0.104575	0.0430464	0.0795594	0.0916844	0.0473613	0.0548992	0.0451332	0.0447958	0.0406504	0.0481359	0.0462312	0.097561	0.0786517	0.0656371
GLYMA_17G111200	GLYMA_17G111200	0.393986	0.411635	0.373217	0.447445	0.630772	0.707022	0.682476	0.385922	0.379587	0.35092	0.184954	0.542223	0.380811	0.21515	0.582406	0.653079	0.0598485	0.0742625	0.104575	0.0662252	0.0985312	0.10661	0.125846	0.0875608	0.0728657	0.0566535	0.0406504	0.0660689	0.0492462	0.0670732	0.0898876	0.100386
GLYMA_11G253100	GLYMA_11G253100	0.443948	0.375316	0.181424	0.276778	0.627904	0.626699	0.388559	0.454099	0.470141	0.464885	0.273481	0.659003	0.672136	0.390669	0.374594	0.693287	0.0636364	0.0676501	0.0588235	0.0298013	0.0936353	0.117271	0.0838972	0.0910354	0.0875476	0.0645586	0.0569106	0.0788108	0.102513	0.0670732	0.0449438	0.11583
GLYMA_08G329200	GLYMA_08G329200	4.6552	5.07312	1.81824	2.06682	4.79447	6.19187	4.27873	5.64572	6.60696	6.94765	5.40903	6.78156	6.6545	4.19707	6.89228	6.19552	0.427273	0.516785	0.339869	0.205298	0.438188	0.545842	0.454668	0.600417	0.628059	0.565217	0.504065	0.488438	0.545729	0.512195	0.505618	0.528958
GLYMA_06G320100	GLYMA_06G320100	0.25341	0.285913	0.135028	0.237306	0.235498	0.182448	0.379944	0.287497	0.34941	0.241435	0.0994504	0.30377	0.256982	0.178998	0.164789	0.279153	0.0393939	0.0544252	0.0261438	0.0397351	0.0361077	0.0319829	0.0811908	0.0625434	0.0723219	0.0382082	0.0162602	0.0368098	0.0462312	0.0365854	0.0337079	0.0579151
GLYMA_17G253900	GLYMA_17G253900	0.652937	0.881603	0.641007	0.415668	0.576533	0.654222	1.42508	1.08594	1.15112	0.756439	0.526771	0.88383	0.819503	0.7365	0.373014	0.937618	0.0954545	0.152594	0.150327	0.0629139	0.0881273	0.0916844	0.221922	0.211258	0.20609	0.118577	0.0894309	0.107126	0.135678	0.146341	0.0674157	0.150579
GLYMA_14G207200	GLYMA_14G207200	1.00857	1.27206	0.768464	1.73326	1.08213	1.23052	1.87832	1.50692	2.07433	1.76857	1.26656	1.16527	1.34358	0.543037	1.04608	0.846237	0.144697	0.211089	0.183007	0.192053	0.150551	0.187633	0.292287	0.257818	0.320283	0.245059	0.154472	0.135913	0.18191	0.103659	0.101124	0.119691
GLYMA_09G037900	GLYMA_09G037900	0.759902	0.702447	0.32158	0.672002	0.673552	1.22817	0.870641	0.741429	0.925793	0.973472	0.926204	0.890439	0.755099	0.590566	0.625835	0.788606	0.106061	0.129705	0.0718954	0.0827815	0.0930233	0.191898	0.158322	0.14385	0.167482	0.158103	0.138211	0.105238	0.103518	0.115854	0.0898876	0.111969
GLYMA_02G158100	GLYMA_02G158100	1.30181	1.29128	0.761527	0.637703	1.45812	1.64015	1.12596	1.48002	1.40323	1.64999	2.15006	1.8441	1.7438	1.52053	2.43458	1.3078	0.188636	0.203459	0.176471	0.0794702	0.201346	0.253731	0.211096	0.255733	0.232735	0.221344	0.243902	0.198207	0.232161	0.262195	0.258427	0.196911
GLYMA_14G014800	GLYMA_14G014800	0.435175	0.237129	0.228982	0.201754	0.393119	0.310693	0.300975	0.251968	0.403997	0.401649	0.114009	0.414812	0.411835	0.415259	0.115727	0.345699	0.0568182	0.0452696	0.0718954	0.0264901	0.0520196	0.0426439	0.0581867	0.0507297	0.0717781	0.057971	0.0243902	0.0462482	0.0643216	0.097561	0.0224719	0.0540541
GLYMA_05G202900	GLYMA_05G202900	1.00421	1.05515	0.520626	1.21732	0.853807	1.00401	1.37544	1.1524	1.67425	1.98722	1.19272	0.944489	1.2616	0.8642	0.852403	1.31545	0.149242	0.168362	0.130719	0.122517	0.125459	0.168443	0.223275	0.189715	0.27515	0.259552	0.138211	0.109486	0.176884	0.176829	0.0674157	0.177606
GLYMA_16G112900	GLYMA_16G112900	0.588154	0.499497	0.731661	0.464576	1.05752	0.953027	0.475909	0.70467	0.527144	0.495925	0.513077	0.766749	0.566273	0.756283	1.09078	0.285818	0.0954545	0.0920651	0.176471	0.0629139	0.164015	0.151386	0.0920162	0.152189	0.0989668	0.0895916	0.0731707	0.0943841	0.081407	0.146341	0.101124	0.0694981
GLYMA_01G038300	GLYMA_01G038300	1.21448	1.4623	0.87588	1.20574	0.995842	1.06873	1.29302	1.22401	1.14136	0.875801	0.582947	1.02299	0.856254	2.22471	1.41866	0.790674	0.172727	0.226348	0.20915	0.145695	0.145043	0.172708	0.219215	0.218902	0.206634	0.13307	0.097561	0.115149	0.138693	0.329268	0.179775	0.138996
GLYMA_12G148600	GLYMA_12G148600	0.154487	0.198379	0.0786027	0.0839197	0.110888	0.226579	0.214354	0.148796	0.195237	0.0794409	0.0669694	0.255573	0.252323	0.198263	0.109726	0.13372	0.0242424	0.0320448	0.0130719	0.013245	0.0165239	0.0319829	0.0419486	0.0305768	0.0440457	0.0131752	0.00813008	0.0330345	0.041206	0.0487805	0.011236	0.027027
GLYMA_11G148000	GLYMA_11G148000	0.272654	0.287353	0.497014	0.157216	0.471932	0.599798	0.389883	0.240447	0.377949	0.260574	0.217062	0.361166	0.391972	0.422147	0.202009	0.219822	0.0393939	0.0569685	0.111111	0.0165563	0.0679315	0.113006	0.0811908	0.0465601	0.0761283	0.0395257	0.0569106	0.0377537	0.0633166	0.0914634	0.0337079	0.034749
GLYMA_20G134900	GLYMA_20G134900	0.437707	0.521584	0.450007	0.519764	0.628404	0.406236	0.671963	0.539938	0.843939	0.536476	0.658378	0.538323	0.727085	0.732829	0.221251	0.588821	0.0840909	0.0961343	0.163399	0.0662252	0.102203	0.0682303	0.140731	0.118138	0.170201	0.085639	0.0894309	0.07126	0.109548	0.182927	0.0224719	0.0965251
GLYMA_03G000600	GLYMA_03G000600	0.372633	0.488524	0.215304	0.169859	0.620239	0.522448	0.431477	0.578487	0.600729	0.463392	0.464424	0.616505	0.647847	0.262336	0.185114	0.340223	0.0666667	0.100712	0.0588235	0.0264901	0.0881273	0.102345	0.0893099	0.114663	0.11963	0.0843215	0.0731707	0.0802265	0.0944724	0.0670732	0.0224719	0.0772201
GLYMA_12G073900	GLYMA_12G073900	5.04907	6.38156	2.61291	3.2713	3.55162	3.47287	4.47735	6.14412	8.16725	6.2074	4.83204	4.26718	4.61493	4.22413	2.14137	2.40411	0.45303	0.561038	0.385621	0.284768	0.338433	0.375267	0.483085	0.561501	0.700381	0.534914	0.447154	0.314771	0.394975	0.426829	0.258427	0.250965
GLYMA_07G030900	GLYMA_07G030900	0.430218	0.270176	0.141014	0.33775	0.139665	0.159088	0.308244	0.304274	0.286038	0.255285	0.314379	0.187897	0.220337	0.302345	0.206911	0.532287	0.0727273	0.0544252	0.0326797	0.0529801	0.0220318	0.0234542	0.0581867	0.0653231	0.0641653	0.0421607	0.0487805	0.0245399	0.0351759	0.097561	0.0337079	0.100386
GLYMA_16G063000	GLYMA_16G063000	0.176537	0.156508	0.196979	0.174398	0.170872	0.141026	0.182932	0.156244	0.144669	0.158347	0.266648	0.235113	0.137521	0.0949302	0.361724	0.211581	0.0310606	0.0305188	0.0718954	0.0298013	0.0269278	0.0298507	0.0392422	0.0396108	0.0331702	0.030303	0.0569106	0.029731	0.0231156	0.0243902	0.0449438	0.027027
GLYMA_20G170700	GLYMA_20G170700	0.381897	0.179348	0.25508	0.278163	0.683361	0.63722	0.211229	0.255052	0.226088	0.182429	0.254519	0.518375	0.210667	0.675064	0.438907	0.266116	0.0530303	0.034588	0.0588235	0.0430464	0.102203	0.113006	0.0554804	0.0590688	0.0483959	0.0329381	0.0487805	0.0684285	0.0361809	0.146341	0.0449438	0.03861
GLYMA_06G269500	GLYMA_06G269500	0.720857	0.552069	0.607311	0.331507	0.809583	0.669654	0.794307	0.637756	0.428968	0.492987	0.849516	0.649955	0.824476	0.242193	0.452781	0.922575	0.0939394	0.0879959	0.143791	0.0397351	0.0997552	0.117271	0.127199	0.111188	0.0799347	0.0777339	0.0894309	0.0707881	0.108543	0.054878	0.0449438	0.123552
GLYMA_07G109900	GLYMA_07G109900	0.399578	0.391948	0.30657	0.30512	0.254139	0.138527	0.45935	0.351949	0.451861	0.428935	0.527684	0.330984	0.34502	0.409477	0.514678	0.446896	0.0606061	0.0773143	0.124183	0.0529801	0.0440636	0.0298507	0.0893099	0.0889507	0.0935291	0.0645586	0.0731707	0.0471921	0.0532663	0.097561	0.0786517	0.0540541
GLYMA_18G216000	GLYMA_18G216000	0.675128	0.487289	0.515363	0.371065	0.853607	1.00223	0.937788	0.490443	0.564875	0.706683	0.920618	0.94772	0.726854	0.746629	0.946179	1.41295	0.0871212	0.0829095	0.143791	0.0463576	0.114443	0.144989	0.140731	0.102849	0.104948	0.101449	0.113821	0.103351	0.110553	0.121951	0.101124	0.212355
GLYMA_05G004900	GLYMA_05G004900	0.0682557	0.1697	0.0744063	0.114897	0.123848	0.0608063	0.194752	0.131906	0.193692	0.147384	0.0519612	0.117195	0.109573	0.0723647	0.197816	0.101669	0.0143939	0.0340793	0.0130719	0.013245	0.0195838	0.0191898	0.0446549	0.0305768	0.0375204	0.0263505	0.0162602	0.0122699	0.0120603	0.0182927	0.011236	0.011583
GLYMA_10G283100	GLYMA_10G283100	0.107712	0.170972	0.154352	0.105559	0.132422	0.101821	0.236011	0.123215	0.171534	0.0827187	0.0971336	0.1548	0.193446	0.11524	0.213557	0.0619967	0.0181818	0.0325534	0.0196078	0.00993377	0.0159119	0.0191898	0.0392422	0.0305768	0.0369766	0.0118577	0.00813008	0.0198207	0.0301508	0.0304878	0.0449438	0.015444
GLYMA_15G091600	GLYMA_15G091600	0.229058	0.64176	0.732284	0.354698	0.392841	0.270502	0.822171	0.647699	0.723613	0.475954	0.228506	0.360025	0.216064	0.780018	0.404327	0.280871	0.0333333	0.107833	0.163399	0.0430464	0.0556916	0.0554371	0.133965	0.127172	0.132681	0.0698287	0.0406504	0.0410571	0.0311558	0.128049	0.0449438	0.034749
GLYMA_15G150900	GLYMA_15G150900	1.68821	2.16179	0.707298	0.994627	1.4119	2.2562	2.5062	1.52846	2.69132	2.12497	1.21634	1.75331	1.78141	1.12499	0.99232	1.2328	0.224242	0.30061	0.143791	0.109272	0.176867	0.294243	0.370771	0.266157	0.382817	0.28195	0.162602	0.1916	0.229146	0.213415	0.101124	0.181467
GLYMA_16G215500	GLYMA_16G215500	0.301736	0.233956	0.212973	0.342615	0.354286	0.347525	0.300309	0.293938	0.329989	0.364909	0.147365	0.374638	0.359478	0.0984914	0.229499	0.145708	0.0515152	0.0427263	0.0457516	0.0430464	0.0563035	0.0660981	0.0568336	0.0604587	0.0647091	0.0566535	0.0243902	0.0424729	0.0532663	0.0426829	0.0449438	0.027027
GLYMA_10G099600	GLYMA_10G099600	0.436037	0.388922	0.544412	0.324594	0.380266	0.301494	0.265996	0.397748	0.318242	0.296634	0.164241	0.314327	0.416305	0.143129	0.412298	0.257289	0.0674242	0.0732452	0.150327	0.0596026	0.0569155	0.0511727	0.0433018	0.0882557	0.0647091	0.057971	0.0243902	0.0420009	0.0633166	0.0304878	0.0337079	0.046332
GLYMA_17G000700	GLYMA_17G000700	0.490088	0.451302	0.177532	0.368828	0.675267	0.530058	0.518592	0.44013	0.488753	0.352464	0.3482	0.526384	0.474483	0.484805	0.226052	0.497692	0.0742424	0.0986775	0.0653595	0.0562914	0.105263	0.0938166	0.109608	0.104934	0.104405	0.0632411	0.097561	0.0679566	0.080402	0.0731707	0.0224719	0.0694981
GLYMA_12G091600	GLYMA_12G091600	0.555447	0.484408	0.537369	0.226881	0.503802	0.518372	0.659354	0.534366	0.456972	0.862717	0.475594	0.645243	0.487475	0.356522	0.342322	0.309957	0.0848485	0.0930824	0.137255	0.0397351	0.0795594	0.0938166	0.136671	0.110493	0.0902664	0.130435	0.0731707	0.077395	0.080402	0.0792683	0.0449438	0.0810811
GLYMA_04G141000	GLYMA_04G141000	0.493095	0.505903	0.572151	0.328122	0.584224	0.560862	0.51323	0.581761	0.620216	0.61035	0.682226	0.622379	0.520196	0.528601	0.179431	0.519871	0.0772727	0.0940997	0.150327	0.0562914	0.0869033	0.110874	0.097429	0.123002	0.122893	0.0948617	0.0894309	0.0759792	0.081407	0.128049	0.0224719	0.100386
GLYMA_11G147400	GLYMA_11G147400	0.124689	0.128707	0.210662	0.335516	0.197168	0.114233	0.167625	0.164566	0.243421	0.126162	0.127505	0.20565	0.242306	0.103793	0.394593	0.386431	0.0234848	0.0295015	0.0392157	0.0463576	0.0312118	0.0255864	0.0365359	0.0375261	0.0560087	0.0237154	0.0162602	0.0245399	0.040201	0.0182927	0.0224719	0.0694981
GLYMA_13G066200	GLYMA_13G066200	1.21216	1.14815	0.67749	0.701854	1.04542	0.716172	1.28943	1.37557	1.22282	2.0409	2.57552	1.22547	1.25141	1.4988	1.15667	1.27388	0.17197	0.19532	0.183007	0.0960265	0.156059	0.134328	0.228687	0.248784	0.219141	0.280632	0.333333	0.137329	0.175879	0.280488	0.146067	0.19305
GLYMA_12G045400	GLYMA_12G045400	1.16796	0.747965	0.91071	0.337661	1.04952	0.953843	0.551501	0.790597	0.575559	0.528333	0.462685	0.813151	0.788886	0.412781	0.464253	0.307233	0.146212	0.124619	0.235294	0.0562914	0.149327	0.153518	0.113667	0.154969	0.101686	0.0750988	0.097561	0.0924965	0.111558	0.103659	0.0674157	0.0579151
GLYMA_06G247400	GLYMA_06G247400	0.657002	0.709685	0.644518	0.642791	0.641331	0.726036	0.603668	0.760819	0.859176	0.769633	0.856402	0.74285	0.535247	0.389684	1.0111	0.266017	0.115909	0.134791	0.196078	0.089404	0.108323	0.117271	0.117727	0.165393	0.174008	0.129117	0.146341	0.0920245	0.0954774	0.115854	0.11236	0.0656371
GLYMA_10G296700	GLYMA_10G296700	0.126655	0.0972842	0.0530298	0.0583645	0.18801	0.129466	0.195187	0.142518	0.139367	0.0915382	0.109275	0.186391	0.160388	0.072066	0.117654	0.0513545	0.0181818	0.0203459	0.0196078	0.013245	0.0336597	0.0191898	0.0460081	0.0347464	0.0271887	0.0171278	0.00813008	0.0221803	0.0281407	0.0121951	0.011236	0.019305
GLYMA_06G061300	GLYMA_06G061300	0.345146	0.277738	0.528271	0.436134	0.507833	0.485167	0.277924	0.238086	0.185671	0.298265	0.365481	0.343881	0.235302	0.705631	0.468939	0.300077	0.0560606	0.0478128	0.150327	0.0596026	0.0795594	0.0852878	0.0608931	0.0583739	0.0445895	0.0461133	0.0487805	0.0396413	0.0341709	0.128049	0.0561798	0.0501931
GLYMA_16G155600	GLYMA_16G155600	0.802221	0.833896	1.02777	1.17892	1.22584	1.02322	0.986432	0.801595	0.730787	1.04042	0.38081	1.06903	1.05705	1.1169	1.44721	0.848227	0.127273	0.13174	0.267974	0.142384	0.148103	0.159915	0.173207	0.154969	0.129418	0.13834	0.0650407	0.118452	0.138693	0.20122	0.134831	0.111969
GLYMA_06G316500	GLYMA_06G316500	0.257767	0.264685	0.25188	0.101649	0.328345	0.386263	0.298356	0.211355	0.291587	0.279469	0.17197	0.354363	0.245766	0.125476	0.278054	0.216113	0.0477273	0.0488301	0.0653595	0.0165563	0.0501836	0.0660981	0.0690122	0.0437804	0.0538336	0.0447958	0.0406504	0.0420009	0.038191	0.0304878	0.0337079	0.046332
GLYMA_08G019800	GLYMA_08G019800	0.367535	0.333142	0.25362	0.391505	0.487968	0.264166	0.649499	0.344669	0.321872	0.335272	0.564599	0.453815	0.375763	0.387675	0.631173	0.963726	0.0537879	0.0590031	0.0588235	0.0562914	0.0722154	0.0660981	0.132612	0.0729673	0.0565525	0.0461133	0.0894309	0.0556866	0.0623116	0.0792683	0.0786517	0.138996
GLYMA_03G253000	GLYMA_03G253000	0.580009	0.546377	0.738502	0.817981	0.695335	0.607369	0.383469	0.585703	0.585174	0.905351	0.577209	0.773649	0.556148	1.45711	1.22081	0.577398	0.0893939	0.0940997	0.124183	0.089404	0.104039	0.0938166	0.082544	0.120917	0.107667	0.129117	0.0650407	0.0957999	0.0854271	0.22561	0.11236	0.0810811
GLYMA_20G198000	GLYMA_20G198000	1.35203	0.828474	1.0085	1.01641	1.0626	1.94895	0.924342	0.935648	0.596096	0.92279	0.682474	1.08003	1.05484	2.26451	1.42255	1.35086	0.17803	0.144456	0.20915	0.135762	0.141983	0.232409	0.159675	0.191105	0.113649	0.135705	0.113821	0.130722	0.154774	0.231707	0.134831	0.189189
GLYMA_06G084300	GLYMA_06G084300	1.17415	0.997029	0.982676	0.585693	0.664128	0.806071	1.51321	1.03788	1.84909	1.50359	0.873368	1.12053	0.867325	1.05667	0.48678	0.679816	0.156818	0.145982	0.163399	0.0596026	0.0740514	0.123667	0.2341	0.177206	0.288744	0.185771	0.138211	0.121284	0.114573	0.189024	0.0561798	0.0888031
GLYMA_01G157800	GLYMA_01G157800	0.280432	0.375374	0.387578	0.831575	0.401767	0.550599	0.39468	0.355755	0.328591	0.299447	0.706892	0.347432	0.277942	0.591307	0.672239	0.218959	0.0484848	0.0671414	0.0849673	0.0927152	0.0642595	0.0895522	0.0744249	0.0778318	0.0592713	0.057971	0.105691	0.0429448	0.0422111	0.115854	0.0786517	0.030888
GLYMA_15G237300	GLYMA_15G237300	0.453394	0.38535	0.170925	0.328104	0.202911	0.649106	0.393465	0.242321	0.489124	0.622184	0.209859	0.29357	0.352726	0.243196	0.180209	0.187425	0.0681818	0.0737538	0.0784314	0.0529801	0.0336597	0.100213	0.0663058	0.0528145	0.100054	0.0948617	0.0569106	0.0386975	0.0532663	0.0609756	0.0224719	0.023166
GLYMA_13G082400	GLYMA_13G082400	0.312972	0.314945	0.375629	0.395005	0.266922	0.104512	0.39689	0.183215	0.184815	0.235831	0.169198	0.167192	0.216357	0.249064	0.143582	0.376548	0.0522727	0.0590031	0.124183	0.0629139	0.0489596	0.0234542	0.0730717	0.0389159	0.0489396	0.0395257	0.0243902	0.0217084	0.040201	0.0487805	0.0337079	0.0540541
GLYMA_20G235500	GLYMA_20G235500	0.475126	0.325848	0.488201	0.483669	1.08853	1.21399	0.367982	0.713255	0.441983	0.595887	0.750314	0.983832	0.717314	0.846212	0.937445	0.319794	0.0636364	0.0620549	0.143791	0.0629139	0.156059	0.185501	0.0703654	0.136901	0.0750408	0.0777339	0.0731707	0.111373	0.101508	0.20122	0.0786517	0.0579151
GLYMA_05G163800	GLYMA_05G163800	0.218884	0.281875	0.167503	0.204896	0.309596	0.28764	0.293328	0.279278	0.244894	0.429924	0.416844	0.394603	0.314723	0.142456	0.267222	0.113255	0.0401515	0.0564598	0.0718954	0.0331126	0.0538556	0.0490405	0.0690122	0.0590688	0.0500272	0.0685112	0.0569106	0.0500236	0.0512563	0.0609756	0.0224719	0.011583
GLYMA_02G161200	GLYMA_02G161200	0.352961	0.416019	0.501435	0.213239	0.218886	0.240485	0.194402	0.317123	0.296556	0.246124	0.151376	0.264691	0.352898	0.455128	0.178443	0.1321	0.055303	0.0885046	0.150327	0.0298013	0.0397797	0.0469083	0.0433018	0.0799166	0.062534	0.0408432	0.0325203	0.0349221	0.0562814	0.103659	0.0224719	0.034749
GLYMA_09G174000	GLYMA_09G174000	1.19718	1.22491	0.824785	1.02898	0.729763	0.997129	0.998943	0.866634	0.900344	0.743809	0.855917	0.893778	0.802982	1.16485	0.774889	2.77001	0.165152	0.198372	0.183007	0.129139	0.109547	0.151386	0.197564	0.162613	0.173464	0.110672	0.121951	0.102879	0.122613	0.213415	0.101124	0.239382
GLYMA_17G032400	GLYMA_17G032400	0.650091	0.64647	0.314794	1.1948	0.626547	0.36135	0.834809	0.527072	0.604738	0.806893	0.950398	0.69754	0.694022	0.44752	1.02942	0.683521	0.0969697	0.106816	0.0653595	0.139073	0.0930233	0.0788913	0.155616	0.102154	0.121262	0.129117	0.146341	0.0783388	0.103518	0.0731707	0.134831	0.0965251
GLYMA_16G077300	GLYMA_16G077300	0.64467	0.477709	0.544315	0.278992	0.806192	0.622833	0.473608	0.438618	0.40538	0.422456	0.350367	0.661948	0.692352	0.407043	0.431848	0.21241	0.0939394	0.0783316	0.156863	0.0463576	0.117503	0.104478	0.0866035	0.0931202	0.0739532	0.0711462	0.0487805	0.0731477	0.0954774	0.103659	0.0449438	0.03861
GLYMA_08G047000	GLYMA_08G047000	0.0780012	0.122475	0.0850481	0.120192	0.0773346	0.0576502	0.0968282	0.0930593	0.0856349	0.0838354	0.133694	0.0738707	0.0997541	0.0530074	0.201109	0.112043	0.0159091	0.0279756	0.00653595	0.0198675	0.0146879	0.010661	0.0162382	0.0208478	0.0195759	0.0158103	0.0243902	0.00849457	0.0170854	0.0182927	0.0224719	0.027027
GLYMA_16G114700	GLYMA_16G114700	0.555759	0.466617	0.513952	0.678728	0.56315	0.833453	0.553933	0.481607	0.475249	0.583322	0.558888	0.601605	0.491312	0.511177	0.21968	0.522027	0.0795455	0.0803662	0.150327	0.0927152	0.0911873	0.140725	0.100135	0.0917304	0.0908102	0.085639	0.0894309	0.0745635	0.081407	0.103659	0.0337079	0.0888031
GLYMA_12G181300	GLYMA_12G181300	0.788891	0.572257	0.501014	0.32909	1.14402	0.980956	0.794252	0.971717	0.906188	0.964507	0.529108	1.11056	1.18488	0.924834	1.09088	1.24802	0.10303	0.114954	0.137255	0.0463576	0.157283	0.151386	0.147497	0.1918	0.175639	0.151515	0.0813008	0.129778	0.167839	0.176829	0.123596	0.169884
GLYMA_01G150600	GLYMA_01G150600	0.869789	1.57529	1.29711	1.04538	0.844457	0.508284	1.06356	1.41553	1.32339	1.09773	0.415499	0.622939	0.61484	0.539895	0.477002	1.18791	0.130303	0.224313	0.228758	0.13245	0.119339	0.0959488	0.177267	0.261293	0.241436	0.160738	0.0813008	0.077395	0.0914573	0.128049	0.0224719	0.177606
GLYMA_13G256800	GLYMA_13G256800	1.17953	1.20107	0.449572	0.480639	0.929418	0.846885	1.40546	1.41161	1.70446	1.59141	1.32717	1.43222	1.48746	1.26834	0.883462	1.01491	0.169697	0.187691	0.0784314	0.0629139	0.132191	0.130064	0.23816	0.251564	0.292007	0.222661	0.186992	0.15479	0.211055	0.20122	0.123596	0.150579
GLYMA_05G220000	GLYMA_05G220000	0.781231	0.76578	0.605366	1.16227	0.306606	0.406376	0.555357	0.662393	0.405227	0.548305	0.718739	0.54132	0.802401	0.799263	0.868017	0.522772	0.114394	0.118006	0.137255	0.0927152	0.0495716	0.0618337	0.097429	0.120917	0.0799347	0.0816864	0.0894309	0.0618216	0.112563	0.121951	0.0898876	0.0849421
GLYMA_15G138200	GLYMA_15G138200	0.093646	0.109823	0.145693	0.263043	0.0752937	0.172774	0.179941	0.127631	0.123426	0.0845029	0.0711678	0.112425	0.175831	0.0693907	0.155838	0.167153	0.0189394	0.0208545	0.0522876	0.0298013	0.0134639	0.0341151	0.0311231	0.0291869	0.0266449	0.0158103	0.0162602	0.0155734	0.0231156	0.0304878	0.011236	0.027027
GLYMA_13G278700	GLYMA_13G278700	1.10213	1.39839	0.646114	0.646968	0.596581	0.916466	0.985701	1.38723	1.71898	1.61247	1.3321	1.41687	1.59341	0.646851	0.60843	0.453525	0.151515	0.200916	0.156863	0.0960265	0.0764994	0.123667	0.182679	0.227241	0.261555	0.218709	0.162602	0.147711	0.19598	0.0914634	0.0674157	0.0694981
GLYMA_05G059500	GLYMA_05G059500	0.151077	0.100707	0.0909946	0.0704509	0.231701	0.219936	0.267011	0.20844	0.158485	0.202735	0.152516	0.248039	0.136318	0.107152	0.182513	0.187175	0.0219697	0.0213632	0.0261438	0.013245	0.0348837	0.0447761	0.0500677	0.0430855	0.0320827	0.0263505	0.0162602	0.0353941	0.0231156	0.0243902	0.0224719	0.023166
GLYMA_01G094200	GLYMA_01G094200	1.41065	1.09709	0.597804	0.849914	1.25793	1.35349	1.23884	1.01164	1.29618	1.13365	1.43459	1.44545	1.48112	1.0099	2.26543	1.22803	0.196212	0.179552	0.150327	0.0794702	0.172583	0.217484	0.216509	0.179291	0.21751	0.166008	0.195122	0.162813	0.18794	0.213415	0.202247	0.185328
GLYMA_05G089900	GLYMA_05G089900	0.90531	0.828053	0.568608	0.538188	2.03829	1.79786	0.556715	1.0156	0.893518	1.41393	1.85024	1.85664	1.33979	1.47777	1.25338	0.950338	0.129545	0.134791	0.124183	0.0529801	0.228886	0.257996	0.109608	0.176511	0.156063	0.192358	0.243902	0.18924	0.182915	0.207317	0.146067	0.142857
GLYMA_13G007400	GLYMA_13G007400	0.428252	0.404782	0.207036	0.212472	0.669738	0.56048	0.38834	0.4005	0.478856	0.443407	0.745759	0.695089	0.531002	0.32013	0.783932	0.218604	0.0674242	0.0722279	0.0522876	0.0264901	0.102203	0.10661	0.0838972	0.0806115	0.0897227	0.0737813	0.097561	0.0816423	0.079397	0.0731707	0.101124	0.042471
GLYMA_13G361000	GLYMA_13G361000	0.0787024	0.0251926	0.0525298	0.0526051	0.0782958	0.0812742	0.053726	0.0519765	0.048652	0.061121	0.0937923	0.0521191	0.0256395	0.0247768	0.067891	0.086244	0.0113636	0.00508647	0.0196078	0.00993377	0.0122399	0.0191898	0.00811908	0.0145935	0.00815661	0.0105402	0.0162602	0.00755073	0.0040201	0.00609756	0.011236	0.015444
GLYMA_01G122100	GLYMA_01G122100	0.580375	0.577671	0.622277	1.03337	0.64616	0.44377	0.51359	0.534158	0.51503	0.630585	0.394378	0.570299	0.440863	0.866383	0.580731	0.27302	0.0840909	0.0991862	0.143791	0.115894	0.100367	0.0852878	0.108254	0.106324	0.096248	0.0988142	0.0813008	0.0726758	0.0733668	0.164634	0.0561798	0.0540541
GLYMA_18G131200	GLYMA_18G131200	0.226718	0.231596	0.46329	0.314774	0.217019	0.12665	0.309669	0.187501	0.21778	0.139951	0.322208	0.171747	0.12248	0.156975	0.155623	0.200293	0.0386364	0.0417091	0.0849673	0.0496689	0.0367197	0.0255864	0.0554804	0.0403058	0.0424144	0.0250329	0.0325203	0.0212364	0.0221106	0.0304878	0.011236	0.03861
GLYMA_01G144200	GLYMA_01G144200	0.403977	0.318796	0.38891	0.405578	0.479227	0.3536	0.227042	0.443799	0.229732	0.373435	0.545358	0.377442	0.359872	0.661742	0.858755	0.25443	0.0621212	0.0584944	0.104575	0.0562914	0.0746634	0.0618337	0.0554804	0.0903405	0.0462208	0.0645586	0.0813008	0.0420009	0.0552764	0.146341	0.11236	0.0579151
GLYMA_11G120700	GLYMA_11G120700	0.309133	0.226089	0.150437	0.200642	0.500798	0.351646	0.311997	0.381424	0.272581	0.405522	0.568944	0.407236	0.359971	0.302478	0.354428	0.474294	0.0469697	0.0427263	0.0392157	0.0331126	0.0685435	0.0703625	0.0514208	0.076442	0.050571	0.0632411	0.0731707	0.0467202	0.0552764	0.0853659	0.0561798	0.0810811
GLYMA_02G239900	GLYMA_02G239900	0.286004	0.130872	0.0771018	0.0967663	0.218574	0.154246	0.0899374	0.211396	0.0852674	0.111099	0.0966716	0.15592	0.0756343	0.0811261	0.137319	0.0919894	0.0378788	0.0218718	0.0130719	0.00993377	0.0318237	0.0234542	0.0162382	0.0375261	0.016857	0.0158103	0.00813008	0.017933	0.0120603	0.0182927	0.0224719	0.011583
GLYMA_19G223200	GLYMA_19G223200	0.531993	1.4281	0.382914	1.40558	0.781626	0.443121	0.685862	0.780829	1.06908	0.377737	0.466675	0.753637	0.731407	0.595396	0.96555	0.528994	0.0765152	0.206511	0.0653595	0.129139	0.103427	0.0810235	0.106901	0.152189	0.175095	0.0592885	0.0731707	0.0877773	0.0994975	0.103659	0.0898876	0.0849421
GLYMA_20G226700	GLYMA_20G226700	0.195717	0.158743	0.0854372	0.0987963	0.274808	0.160923	0.281818	0.211829	0.220574	0.280053	0.191997	0.204742	0.232051	0.206884	0.0745584	0.125114	0.0325758	0.0335707	0.00653595	0.0165563	0.0428397	0.0319829	0.0554804	0.047255	0.0489396	0.0434783	0.0243902	0.0278433	0.0351759	0.0609756	0.011236	0.023166
GLYMA_05G020200	GLYMA_05G020200	0.587709	0.835341	1.21838	0.500647	0.536536	0.674762	0.412143	0.539973	0.429574	0.580574	0.414931	0.709606	0.433935	0.702262	0.779111	0.322454	0.0886364	0.138352	0.300654	0.0728477	0.0795594	0.100213	0.082544	0.111188	0.0821098	0.088274	0.0813008	0.0868334	0.0683417	0.152439	0.11236	0.0579151
GLYMA_12G198700	GLYMA_12G198700	0.147325	0.276425	0.319378	0.458839	0.341331	0.27926	0.335096	0.323381	0.269872	0.353929	0.428735	0.381029	0.339495	0.121456	0.220746	0.206509	0.0265152	0.0534079	0.0784314	0.0629139	0.0618115	0.0511727	0.0608931	0.066713	0.0522023	0.0619236	0.0731707	0.0448325	0.0492462	0.0304878	0.011236	0.046332
GLYMA_04G031600	GLYMA_04G031600	0.0921498	0.120311	0.115651	0.327234	0.143168	0.181413	0.115734	0.114477	0.0995963	0.092458	0.0905261	0.125797	0.0866283	0.167521	0.268751	0.267763	0.0189394	0.0289929	0.0326797	0.0331126	0.0312118	0.0341151	0.0175913	0.0347464	0.023926	0.0210804	0.0162602	0.0202926	0.0140704	0.0243902	0.0449438	0.0540541
GLYMA_13G180400	GLYMA_13G180400	0.390413	0.282432	0.150462	0.24776	0.339157	0.471268	0.396592	0.257849	0.32088	0.371745	0.166103	0.416158	0.284799	0.147637	0.204383	0.55769	0.0598485	0.0488301	0.0653595	0.0364238	0.0514076	0.0639659	0.0798376	0.0500347	0.0609027	0.0619236	0.0162602	0.0471921	0.040201	0.0243902	0.0224719	0.0926641
GLYMA_08G257900	GLYMA_08G257900	0.584827	0.463704	0.445971	0.287672	0.828732	0.646954	0.436556	0.359079	0.518897	0.461481	0.219401	0.733836	0.395414	0.637567	0.550839	0.60845	0.0871212	0.077823	0.130719	0.0496689	0.118727	0.119403	0.0798376	0.0826963	0.0940729	0.0685112	0.0325203	0.0887211	0.0603015	0.146341	0.0561798	0.0849421
GLYMA_05G171400	GLYMA_05G171400	0.285073	0.300188	0.141068	0.246679	0.399754	0.463386	0.299798	0.308763	0.330029	0.467756	0.326399	0.532805	0.50508	0.359982	0.471236	0.172297	0.0439394	0.0554425	0.0392157	0.0331126	0.0636475	0.0724947	0.0622463	0.0639333	0.0636215	0.0737813	0.0569106	0.065597	0.0733668	0.0853659	0.0786517	0.042471
GLYMA_16G032600	GLYMA_16G032600	0.17382	0.190127	0.130179	0.236467	0.181895	0.115674	0.270592	0.0850497	0.162723	0.0868311	0.222833	0.179931	0.170735	0.275367	0.269555	0.321158	0.0280303	0.0350966	0.0457516	0.0364238	0.0379437	0.0277186	0.0595399	0.0250174	0.0402393	0.0158103	0.0325203	0.0278433	0.0291457	0.0609756	0.0224719	0.042471
GLYMA_10G106900	GLYMA_10G106900	0.660164	0.514488	0.268598	0.261875	0.988867	0.642077	0.562537	0.650594	0.57199	0.462232	0.506811	0.898088	0.720357	0.804579	0.528709	0.607222	0.106818	0.0996948	0.0588235	0.0331126	0.143819	0.127932	0.120433	0.124392	0.112561	0.0803689	0.0731707	0.108542	0.117588	0.170732	0.0449438	0.0965251
GLYMA_04G004700	GLYMA_04G004700	0.237556	0.237706	0.232814	0.367483	0.373146	0.476043	0.312968	0.278312	0.257913	0.258665	0.412214	0.388401	0.344438	0.126097	0.263304	0.354895	0.0401515	0.0478128	0.0849673	0.0397351	0.0611995	0.0746269	0.0635995	0.0632384	0.0554649	0.0382082	0.0650407	0.0429448	0.0472362	0.0365854	0.0449438	0.0733591
GLYMA_11G067800	GLYMA_11G067800	0.992348	0.803747	0.343981	0.686838	1.20122	0.911767	0.812398	0.738372	0.887016	0.844784	0.578686	1.02721	0.914722	0.501316	0.454724	1.29848	0.144697	0.130722	0.0718954	0.0860927	0.163403	0.144989	0.14479	0.14663	0.1441	0.135705	0.105691	0.114677	0.127638	0.134146	0.0561798	0.162162
GLYMA_01G239200	GLYMA_01G239200	0.331614	0.533972	1.25137	0.690066	0.613415	0.756239	0.543351	0.414492	0.408085	0.424683	0.621687	0.493061	0.388795	0.646662	0.514006	0.438307	0.0575758	0.08647	0.287582	0.102649	0.0875153	0.130064	0.102842	0.0889507	0.0804785	0.0632411	0.0650407	0.0604059	0.0582915	0.115854	0.0561798	0.0694981
GLYMA_07G242500	GLYMA_07G242500	0.424545	0.321677	0.265831	0.574443	0.342965	0.18892	0.497892	0.269892	0.387812	0.274628	0.194742	0.34081	0.294542	0.163229	0.615933	0.213347	0.0674242	0.069176	0.0849673	0.0596026	0.0563035	0.0426439	0.109608	0.0639333	0.0815661	0.0487484	0.0325203	0.0429448	0.0452261	0.054878	0.0674157	0.03861
GLYMA_04G178000	GLYMA_04G178000	0.377282	0.35776	0.813132	0.441885	0.449463	0.247626	0.466687	0.343396	0.354879	0.272946	0.312287	0.344437	0.215491	0.53198	0.35049	0.71726	0.0651515	0.0829095	0.202614	0.0761589	0.0869033	0.0554371	0.100135	0.0910354	0.0842849	0.0474308	0.0487805	0.0467202	0.0462312	0.0914634	0.0337079	0.104247
GLYMA_05G031000	GLYMA_05G031000	1.64413	1.6304	1.01835	0.78598	1.83855	1.95664	1.2885	2.1023	2.20752	2.96565	1.39865	2.25713	2.30386	1.98913	1.32038	1.63837	0.215909	0.242116	0.261438	0.0927152	0.22399	0.292111	0.217862	0.352328	0.329527	0.362319	0.178862	0.237376	0.290452	0.280488	0.168539	0.239382
GLYMA_19G010300	GLYMA_19G010300	0.658242	0.756471	0.538937	0.668586	0.494909	0.6035	0.614629	0.671994	0.632791	0.911413	0.849051	0.618037	0.644414	1.03797	0.275093	0.853358	0.0916667	0.126653	0.130719	0.0827815	0.0642595	0.102345	0.108254	0.129256	0.113649	0.125165	0.121951	0.0689004	0.0954774	0.146341	0.0449438	0.146718
GLYMA_10G069800	GLYMA_10G069800	1.83326	2.22622	1.1439	0.834747	1.75117	1.65355	1.01516	1.38725	1.30372	1.44366	0.976283	1.59131	1.13137	0.590083	0.832271	1.29741	0.246212	0.305188	0.261438	0.109272	0.21481	0.251599	0.159675	0.213343	0.206634	0.180501	0.154472	0.166588	0.145729	0.134146	0.101124	0.162162
GLYMA_14G060000	GLYMA_14G060000	0.525656	0.623722	0.783751	1.00006	0.494733	0.265082	0.558434	0.662444	0.557037	0.500887	0.664496	0.566442	0.457557	0.323639	0.469185	0.660031	0.0833333	0.120041	0.248366	0.125828	0.0783354	0.0469083	0.105548	0.137596	0.11093	0.0750988	0.097561	0.0651251	0.0663317	0.097561	0.0561798	0.104247
GLYMA_20G191400	GLYMA_20G191400	0.217327	0.241018	0.375028	0.374969	0.238508	0.332458	0.220009	0.261354	0.259939	0.373476	0.419168	0.291512	0.307056	0.498209	0.132085	0.174172	0.0348485	0.0534079	0.130719	0.0496689	0.0330477	0.0682303	0.0460081	0.0590688	0.0489396	0.0606061	0.0243902	0.0353941	0.0512563	0.0853659	0.0224719	0.034749
GLYMA_08G046000	GLYMA_08G046000	0.454765	0.435558	0.304906	0.716191	0.384384	0.189934	0.392421	0.285413	0.382367	0.252182	0.282908	0.370496	0.345523	0.262296	0.290445	0.200985	0.0681818	0.0747711	0.0915033	0.0960265	0.0544676	0.0447761	0.0784844	0.0604587	0.0739532	0.0395257	0.0406504	0.0457763	0.0522613	0.0426829	0.0337079	0.027027
GLYMA_02G140200	GLYMA_02G140200	0.384788	0.270912	0.246939	0.367973	0.198518	0.293412	0.329823	0.137072	0.176746	0.2246	0.361962	0.309828	0.175195	0.186032	0.102052	0.227292	0.0590909	0.0569685	0.0718954	0.0596026	0.0330477	0.0660981	0.0690122	0.0236275	0.0396955	0.0434783	0.0731707	0.0344502	0.0271357	0.0182927	0.011236	0.046332
GLYMA_13G096100	GLYMA_13G096100	0.172983	0.269874	0.170283	0.271693	0.383477	0.243666	0.333546	0.275576	0.280541	0.389597	0.334316	0.284439	0.277342	0.641969	0.615723	0.209818	0.0340909	0.0549339	0.0588235	0.0496689	0.0746634	0.0426439	0.0744249	0.0778318	0.062534	0.0750988	0.0487805	0.0438886	0.0542714	0.140244	0.0561798	0.0501931
GLYMA_15G066100	GLYMA_15G066100	0.289003	0.141175	0.111809	0.0766858	0.242056	0.179909	0.174165	0.25122	0.127238	0.134338	0.0849056	0.145573	0.280385	0.131815	0.0908657	0.169326	0.0462121	0.0244151	0.0392157	0.013245	0.0422277	0.0319829	0.0311231	0.0507297	0.0222947	0.0184453	0.0162602	0.0193487	0.038191	0.0304878	0.0224719	0.019305
GLYMA_10G158800	GLYMA_10G158800	1.23784	1.69464	3.23262	1.87415	1.18398	0.868582	1.08634	1.71981	1.41798	1.52139	1.0393	1.29282	1.13248	0.922986	0.858036	1.00921	0.172727	0.260936	0.464052	0.205298	0.161567	0.132196	0.194858	0.295344	0.23926	0.218709	0.121951	0.136857	0.160804	0.134146	0.0898876	0.166023
GLYMA_06G148700	GLYMA_06G148700	0.710857	0.769506	0.317835	0.600706	0.60831	0.574087	1.02004	0.645109	0.783816	0.776504	0.884307	0.602744	0.707828	0.270855	0.343896	0.46134	0.105303	0.129705	0.0849673	0.0860927	0.0924113	0.117271	0.184032	0.127172	0.140294	0.123847	0.113821	0.0755073	0.106533	0.054878	0.0449438	0.0772201
GLYMA_16G053400	GLYMA_16G053400	0.339226	0.200835	0.250192	0.189024	0.375705	0.232215	0.273227	0.233765	0.218503	0.223749	0.197215	0.334563	0.307295	0.50329	0.711678	0.346865	0.0530303	0.0401831	0.0849673	0.0231788	0.0673195	0.0469083	0.0541272	0.0444753	0.0462208	0.0368906	0.0243902	0.0434167	0.0462312	0.0853659	0.0674157	0.0733591
GLYMA_02G275400	GLYMA_02G275400	1.06146	1.11658	0.458074	0.954043	1.3953	1.2394	1.385	1.11115	1.54606	1.41429	0.890925	1.41367	1.72433	1.36054	0.643297	1.4155	0.155303	0.187691	0.156863	0.125828	0.190942	0.21322	0.230041	0.220292	0.264818	0.216074	0.121951	0.151487	0.233166	0.231707	0.101124	0.204633
GLYMA_16G205700	GLYMA_16G205700	0.121516	0.107266	0.250741	0.164909	0.228179	0.117455	0.123472	0.181566	0.123909	0.177177	0.329457	0.174783	0.138708	0.184141	0.403756	0.181599	0.0212121	0.0249237	0.0457516	0.0165563	0.0397797	0.0234542	0.02977	0.0354413	0.0304513	0.030303	0.0325203	0.0221803	0.0251256	0.0487805	0.0674157	0.027027
GLYMA_19G014100	GLYMA_19G014100	0.254982	0.207937	0.112693	0.244827	0.294053	0.261572	0.229679	0.176485	0.175905	0.193118	0.294069	0.279719	0.246479	0.172664	0.078136	0.180442	0.0409091	0.0396745	0.0326797	0.0331126	0.0422277	0.0469083	0.0487145	0.0416956	0.0320827	0.0289855	0.0325203	0.035866	0.041206	0.054878	0.011236	0.027027
GLYMA_16G112800	GLYMA_16G112800	1.48281	0.979737	0.588306	0.757095	2.21375	2.17307	1.49908	1.00949	1.20317	1.25105	0.762207	2.11439	1.61854	0.736688	1.0053	1.52023	0.178788	0.162767	0.130719	0.10596	0.241738	0.304904	0.225981	0.198749	0.191952	0.176548	0.113821	0.207173	0.211055	0.115854	0.134831	0.196911
GLYMA_12G166500	GLYMA_12G166500	0.919747	0.666858	0.481545	0.295293	0.903985	0.878687	0.676974	1.06735	0.737617	0.592574	0.720661	1.11106	0.862824	0.62429	0.52352	0.60848	0.137121	0.119023	0.117647	0.0463576	0.147491	0.142857	0.128552	0.205003	0.1354	0.085639	0.0894309	0.114677	0.135678	0.152439	0.0561798	0.123552
GLYMA_16G085900	GLYMA_16G085900	1.07392	1.28439	1.14367	2.0279	0.718297	0.567067	1.42212	0.917076	1.23168	0.739735	1.30717	1.2228	1.43859	0.899424	1.84648	2.13359	0.15303	0.208037	0.281046	0.225166	0.0948592	0.0767591	0.23816	0.184851	0.207722	0.113307	0.146341	0.133554	0.19598	0.170732	0.191011	0.281853
GLYMA_15G255000	GLYMA_15G255000	0.394533	0.586124	0.554398	0.223931	0.589984	0.490752	0.737563	0.594567	0.801601	0.84227	0.604237	0.670819	0.590939	0.532556	0.466252	0.580445	0.0643939	0.109868	0.111111	0.0331126	0.0887393	0.0788913	0.136671	0.134121	0.152257	0.139657	0.097561	0.08353	0.0894472	0.103659	0.0561798	0.111969
GLYMA_08G184100	GLYMA_08G184100	1.56272	1.335	0.583964	0.736541	2.19571	2.1493	1.35488	1.44679	1.51431	1.30926	1.20594	1.92475	1.85621	1.3231	1.02908	1.58996	0.201515	0.201424	0.143791	0.0927152	0.255202	0.285714	0.216509	0.227936	0.244154	0.176548	0.146341	0.202454	0.234171	0.20122	0.123596	0.227799
GLYMA_01G238200	GLYMA_01G238200	1.15693	1.16819	1.20675	1.71018	1.31227	0.736122	1.08534	1.03284	1.16694	0.977455	1.34147	1.37271	0.97066	2.25801	2.76763	1.36606	0.150758	0.191251	0.281046	0.182119	0.182987	0.130064	0.166441	0.188325	0.199565	0.150198	0.170732	0.153846	0.136683	0.353659	0.247191	0.204633
GLYMA_07G259500	GLYMA_07G259500	0.438656	0.304748	0.250329	0.239518	0.73163	0.595786	0.456833	0.436282	0.307376	0.332794	0.433513	0.673942	0.455218	0.366843	0.194615	0.532271	0.0636364	0.0574771	0.104575	0.0397351	0.101591	0.104478	0.0933694	0.0875608	0.05764	0.0540184	0.0569106	0.0811704	0.0623116	0.0731707	0.0337079	0.0810811
GLYMA_14G203800	GLYMA_14G203800	0.396374	0.497341	0.705139	1.0846	0.406371	0.469353	0.662329	0.288792	0.33296	0.322483	0.520507	0.380158	0.307196	0.605054	0.694173	0.347245	0.0704545	0.0839268	0.143791	0.122517	0.0618115	0.0788913	0.123139	0.0639333	0.0641653	0.0513834	0.0813008	0.0500236	0.0502513	0.097561	0.0674157	0.0849421
GLYMA_16G167800	GLYMA_16G167800	0.130266	0.113337	0.0549395	0.0892779	0.105163	0.107263	0.106021	0.124518	0.149027	0.114342	0.192079	0.206329	0.127881	0.0986133	0.127681	0.0736841	0.0174242	0.0213632	0.0130719	0.00993377	0.0189718	0.0277186	0.0243572	0.0277971	0.0331702	0.0210804	0.0243902	0.0212364	0.0170854	0.0243902	0.011236	0.015444
GLYMA_15G136300	GLYMA_15G136300	0.412711	0.404524	0.44272	0.391248	0.532961	0.49812	0.425886	0.409993	0.321845	0.333744	0.870227	0.482265	0.281337	0.505741	0.231741	0.391149	0.0651515	0.0727365	0.111111	0.0496689	0.0777234	0.0810235	0.097429	0.0979847	0.0712344	0.0566535	0.105691	0.0575743	0.0572864	0.0914634	0.0449438	0.0694981
GLYMA_07G091000	GLYMA_07G091000	0.0539705	0.0653186	0.0863127	0.0264477	0.0824871	0.0754472	0.0331108	0.062111	0.0636848	0.0560249	0.0323135	0.0507847	0.0376416	0.0695063	0.0450519	0.0229876	0.00909091	0.00915565	0.0261438	0.00331126	0.0134639	0.0170576	0.00947226	0.0159833	0.0130506	0.00922266	0.00813008	0.00613497	0.00603015	0.0121951	0.011236	0.00772201
GLYMA_04G214200	GLYMA_04G214200	0.282312	0.442271	0.138358	0.303745	0.420765	0.388998	0.390114	0.362794	0.485167	0.400401	0.395189	0.404399	0.436932	0.227226	0.519352	0.25012	0.0484848	0.0737538	0.0261438	0.0298013	0.0618115	0.0767591	0.0879567	0.075747	0.0951604	0.0606061	0.0650407	0.0509674	0.0633166	0.0426829	0.0561798	0.0540541
GLYMA_03G173600	GLYMA_03G173600	0.231216	0.22436	0.239444	0.211342	0.225177	0.227832	0.250077	0.184589	0.243326	0.354881	0.175992	0.242439	0.18292	0.233101	0.0945787	0.123154	0.0386364	0.0457782	0.0784314	0.0231788	0.0318237	0.0469083	0.0473613	0.0437804	0.0500272	0.0527009	0.0325203	0.0287872	0.0351759	0.0426829	0.011236	0.030888
GLYMA_02G013600	GLYMA_02G013600	0.503514	0.379091	0.184919	0.449879	0.323268	0.328412	0.229103	0.358152	0.219725	0.338849	0.617599	0.444476	0.403576	0.455256	0.693753	0.315985	0.0810606	0.0651068	0.0588235	0.0562914	0.0458996	0.0597015	0.0514208	0.0708826	0.0396955	0.0513834	0.0650407	0.0528551	0.0603015	0.0853659	0.0674157	0.046332
GLYMA_08G113000	GLYMA_08G113000	0.301405	0.274517	0.329067	0.218683	0.424809	0.60336	0.280611	0.282794	0.234321	0.263455	0.160888	0.365682	0.368531	0.375834	0.497847	0.168473	0.0484848	0.0508647	0.0653595	0.0331126	0.0624235	0.0916844	0.0622463	0.0562891	0.0435019	0.0434783	0.0243902	0.0434167	0.0512563	0.0792683	0.0674157	0.034749
GLYMA_12G204400	GLYMA_12G204400	1.00729	1.7725	3.55044	1.07484	2.11014	0.94692	2.84622	1.87083	2.60935	2.82001	1.17238	0.993238	1.64714	1.3638	1.86949	1.11518	0.143182	0.2706	0.529412	0.119205	0.222766	0.144989	0.266576	0.321056	0.369766	0.341238	0.186992	0.116092	0.217085	0.219512	0.179775	0.185328
GLYMA_18G102500	GLYMA_18G102500	1.38879	1.30937	1.21068	1.18691	1.32371	1.29923	1.09151	1.34472	1.14465	1.38008	1.32346	1.41633	1.27405	4.09246	2.74884	1.47443	0.192424	0.206511	0.27451	0.135762	0.178703	0.176972	0.192152	0.23975	0.18162	0.191041	0.178862	0.15479	0.175879	0.469512	0.258427	0.223938
GLYMA_04G000300	GLYMA_04G000300	0.30868	0.329075	0.401856	0.129666	0.486136	0.427792	0.371788	0.412351	0.282614	0.418351	0.374477	0.481453	0.422687	0.235076	0.291556	0.445471	0.0477273	0.0635809	0.117647	0.0198675	0.0899633	0.0810235	0.0798376	0.0847811	0.0619902	0.0764163	0.0569106	0.0566305	0.0733668	0.0670732	0.0449438	0.0694981
GLYMA_11G074800	GLYMA_11G074800	0.28041	0.238964	0.214657	0.239666	0.176255	0.140186	0.363712	0.275447	0.295395	0.18584	0.147788	0.185658	0.167063	0.193383	0.0970571	0.22697	0.044697	0.0462869	0.0849673	0.0331126	0.0299878	0.0298507	0.0757781	0.0674079	0.0614464	0.0316206	0.0243902	0.0245399	0.0331658	0.0304878	0.0224719	0.0501931
GLYMA_08G336400	GLYMA_08G336400	0.694559	0.567479	0.566524	0.546539	0.543678	0.359264	0.554322	0.521938	0.397701	0.502544	0.470047	0.552652	0.560611	0.631788	0.203743	0.763367	0.0962121	0.0991862	0.156863	0.0629139	0.0789474	0.0724947	0.11502	0.110493	0.0853725	0.0803689	0.0650407	0.0641812	0.0884422	0.121951	0.0449438	0.100386
GLYMA_08G269700	GLYMA_08G269700	2.26694	2.84297	1.65165	1.87627	1.78935	0.924047	3.14334	2.51484	2.79432	2.36289	1.2836	1.62309	1.91972	1.38358	0.839045	1.66686	0.285606	0.383011	0.333333	0.235099	0.228886	0.140725	0.419486	0.389854	0.39913	0.293808	0.186992	0.17697	0.249246	0.243902	0.123596	0.235521
GLYMA_12G237300	GLYMA_12G237300	0.306303	0.239373	0.330939	0.166373	0.281927	0.198901	0.42176	0.276021	0.26147	0.62328	0.578121	0.232426	0.232476	0.25415	0.453118	0.39971	0.0522727	0.0478128	0.0588235	0.0231788	0.0465116	0.0405117	0.0798376	0.0590688	0.0570962	0.0974967	0.0813008	0.0292591	0.040201	0.054878	0.0449438	0.0579151
GLYMA_11G245500	GLYMA_11G245500	0.243551	0.201032	0.16174	0.133104	0.488834	0.427121	0.265163	0.285739	0.340986	0.382581	0.398193	0.498478	0.287553	0.326192	0.140702	0.232292	0.0386364	0.0335707	0.0457516	0.0231788	0.0667075	0.0852878	0.052774	0.0423905	0.0543774	0.0500659	0.0731707	0.053799	0.0452261	0.054878	0.0224719	0.0501931
GLYMA_08G278600	GLYMA_08G278600	1.25643	1.33778	0.545867	0.553677	1.71451	1.4683	1.22997	1.4108	1.90941	2.04393	1.41308	1.91927	1.84915	2.00705	1.68959	1.07695	0.185606	0.198881	0.137255	0.0629139	0.221542	0.236674	0.217862	0.23975	0.293638	0.27668	0.162602	0.204342	0.232161	0.268293	0.157303	0.169884
GLYMA_06G024400	GLYMA_06G024400	0.246155	0.444376	0.254246	0.457749	0.253792	0.239982	0.325135	0.358159	0.387706	0.377672	0.206178	0.294735	0.330725	0.147839	0.196934	0.553189	0.0454545	0.0808749	0.0457516	0.0562914	0.0434517	0.0490405	0.0541272	0.076442	0.0837412	0.0606061	0.0487805	0.0377537	0.0492462	0.0426829	0.0337079	0.0849421
GLYMA_09G178000	GLYMA_09G178000	0.360755	0.281144	0.210269	0.122322	0.409498	0.354345	0.354017	0.278414	0.289588	0.352392	0.157975	0.444416	0.249808	0.427985	0.118789	0.430781	0.0628788	0.0579858	0.0653595	0.0264901	0.0630355	0.0511727	0.0690122	0.0562891	0.05764	0.0500659	0.0406504	0.0547428	0.0472362	0.0609756	0.0337079	0.0579151
GLYMA_17G032500	GLYMA_17G032500	0.186669	0.165628	0.18491	0.100321	0.364457	0.375279	0.15467	0.24284	0.159839	0.249643	0.169566	0.234066	0.156785	0.13078	0.29344	0.224539	0.030303	0.0325534	0.0653595	0.013245	0.0507956	0.0575693	0.0284168	0.0451703	0.0282762	0.0355731	0.0325203	0.0287872	0.0221106	0.0304878	0.0337079	0.03861
GLYMA_11G184600	GLYMA_11G184600	0.054759	0.0607388	0.0484985	0.104701	0.103967	0.0623183	0.0698878	0.0281453	0.0452762	0.0762255	0.0511326	0.0565416	0.105278	0.0458952	0.048223	0.0966931	0.00984848	0.0157681	0.0196078	0.00993377	0.0189718	0.0149254	0.0175913	0.0118138	0.0125068	0.0131752	0.00813008	0.00896649	0.0150754	0.0182927	0.011236	0.023166
GLYMA_04G237100	GLYMA_04G237100	0.603572	0.289407	0.344969	0.393746	0.428279	0.583372	0.200238	0.311473	0.206482	0.45979	0.300872	0.451043	0.386191	0.43039	0.161487	0.348947	0.0833333	0.0483215	0.0718954	0.0364238	0.0624235	0.0746269	0.0405954	0.0555942	0.0418706	0.0658762	0.0487805	0.0523832	0.0492462	0.0792683	0.0224719	0.0617761
GLYMA_01G036500	GLYMA_01G036500	0.632147	0.666267	0.55917	1.19059	0.745192	0.829163	0.388634	1.09292	0.543645	0.520784	0.65498	0.426515	0.39892	1.45254	0.549667	0.479896	0.0901515	0.111902	0.0980392	0.122517	0.115055	0.1258	0.0690122	0.203614	0.096248	0.0711462	0.0894309	0.0575743	0.0582915	0.243902	0.0898876	0.0694981
GLYMA_17G094800	GLYMA_17G094800	1.11972	1.09109	0.436514	0.805247	0.960817	1.63147	1.50531	1.06942	1.49034	0.992755	0.742355	1.13609	1.22933	1.1639	1.25942	0.875291	0.174242	0.186165	0.130719	0.109272	0.137087	0.223881	0.259811	0.202224	0.268624	0.151515	0.097561	0.129306	0.168844	0.22561	0.134831	0.138996
GLYMA_15G274800	GLYMA_15G274800	0.587625	0.648228	0.320076	0.425554	0.616886	1.1961	0.800975	0.637693	0.914011	0.863804	1.03981	0.802877	0.89016	0.418768	0.506628	0.553042	0.0909091	0.107325	0.117647	0.0496689	0.0850673	0.149254	0.162382	0.115358	0.157694	0.129117	0.121951	0.0844738	0.109548	0.097561	0.0561798	0.0926641
GLYMA_06G100600	GLYMA_06G100600	0.666829	0.509876	0.637114	0.370329	1.38386	1.20465	0.730779	1.13201	0.720289	0.721747	0.453465	1.04345	0.755192	0.388479	0.61348	0.806799	0.0984848	0.0813835	0.137255	0.0596026	0.173195	0.189765	0.125846	0.179291	0.11963	0.109354	0.0650407	0.119868	0.122613	0.0731707	0.0786517	0.127413
GLYMA_07G088500	GLYMA_07G088500	0.444625	0.417782	0.463617	0.742741	0.458383	0.270194	0.527885	0.558321	0.538064	0.404866	0.345827	0.389984	0.385488	0.198775	0.392317	0.532405	0.0689394	0.0768057	0.143791	0.0827815	0.0728274	0.0490405	0.0947226	0.129951	0.108755	0.0698287	0.0487805	0.0457763	0.0542714	0.054878	0.0449438	0.0656371
GLYMA_03G136000	GLYMA_03G136000	15.0614	11.1074	5.35849	7.00417	4.47265	4.03164	14.5383	10.2578	9.99795	6.05434	4.83141	7.17147	5.7707	12.759	12.1561	7.06419	0.682576	0.711089	0.614379	0.536424	0.369033	0.36887	0.779432	0.707436	0.690049	0.501976	0.422764	0.438886	0.470352	0.682927	0.550562	0.509653
GLYMA_02G022800	GLYMA_02G022800	0.364355	0.271288	0.347464	0.179598	0.519408	0.361481	0.287774	0.289199	0.248011	0.223642	0.142837	0.367485	0.372144	0.260045	0.139059	0.393609	0.0613636	0.0600203	0.0849673	0.0198675	0.0887393	0.0788913	0.0703654	0.0708826	0.0587276	0.0487484	0.0406504	0.0495517	0.0653266	0.0670732	0.011236	0.0810811
GLYMA_15G008100	GLYMA_15G008100	0.253796	0.367977	0.269391	0.342158	0.492384	0.497036	0.454397	0.321093	0.36173	0.450267	0.294472	0.419339	0.428968	0.180436	0.133084	0.359717	0.05	0.0610376	0.0653595	0.0397351	0.0813953	0.0810235	0.0866035	0.0743572	0.0734095	0.0790514	0.0325203	0.0528551	0.0753769	0.0670732	0.0337079	0.0694981
GLYMA_05G089300	GLYMA_05G089300	1.62445	1.58456	0.81475	0.87897	1.73843	1.5394	1.86815	1.27403	1.68699	1.72023	1.6145	1.85139	1.57293	1.54319	0.500299	1.39032	0.206061	0.233978	0.183007	0.122517	0.212974	0.236674	0.282815	0.230021	0.26808	0.242424	0.211382	0.194903	0.211055	0.219512	0.0561798	0.196911
GLYMA_03G102500	GLYMA_03G102500	0.601635	0.721637	0.658467	0.431985	1.09195	1.61279	0.692855	0.851364	0.64601	0.800325	0.907337	0.88491	0.733755	1.38361	1.13534	0.833602	0.0984848	0.121058	0.169935	0.0629139	0.155447	0.238806	0.117727	0.159138	0.12398	0.134387	0.138211	0.10571	0.106533	0.243902	0.123596	0.131274
GLYMA_02G020800	GLYMA_02G020800	0.287184	0.313539	0.271539	0.29668	0.300922	0.438083	0.408745	0.342266	0.283942	0.599884	0.491263	0.351856	0.239197	0.163312	0.195507	0.160712	0.0462121	0.0574771	0.0457516	0.0364238	0.0483476	0.0746269	0.0784844	0.0708826	0.062534	0.0843215	0.097561	0.0401133	0.040201	0.0426829	0.0337079	0.019305
GLYMA_02G281200	GLYMA_02G281200	0.469693	0.425157	0.153512	0.263084	0.496519	0.454281	0.313319	0.303427	0.434457	0.366189	0.30252	0.572332	0.324122	0.36529	0.47745	0.436675	0.0712121	0.0686673	0.0392157	0.0397351	0.0697674	0.0788913	0.0757781	0.0548992	0.0821098	0.057971	0.0487805	0.0660689	0.0432161	0.0853659	0.0786517	0.0849421
GLYMA_10G240700	GLYMA_10G240700	0.25328	0.268366	0.67571	0.314801	0.469656	0.408959	0.181264	0.32616	0.31494	0.305917	0.277514	0.519467	0.34332	0.466653	0.469482	0.252712	0.0393939	0.0462869	0.156863	0.0364238	0.0801714	0.0810235	0.0405954	0.0701876	0.0609027	0.0421607	0.0406504	0.0613497	0.0623116	0.0670732	0.0674157	0.042471
GLYMA_02G123100	GLYMA_02G123100	0.493554	0.330148	0.337392	0.169796	0.40815	0.527096	0.437089	0.251409	0.223919	0.37009	0.170296	0.632838	0.295112	0.239525	0.441522	0.503429	0.0765152	0.0610376	0.0457516	0.0231788	0.0593635	0.0767591	0.0771313	0.0548992	0.0424144	0.0606061	0.0243902	0.0707881	0.0472362	0.054878	0.0561798	0.042471
GLYMA_19G080400	GLYMA_19G080400	0.0861031	0.151618	0.109201	0.104295	0.162299	0.0648673	0.15361	0.0887358	0.231839	0.161704	0.176611	0.241761	0.202862	0.117426	0.122954	0.1122	0.0159091	0.0356053	0.0392157	0.0165563	0.0293758	0.0191898	0.0270636	0.0271022	0.0435019	0.0329381	0.0243902	0.0353941	0.0361809	0.0426829	0.0224719	0.015444
GLYMA_06G141000	GLYMA_06G141000	0.121703	0.0951558	0.138892	0.158672	0.118264	0.117912	0.108172	0.0553186	0.0425807	0.0780202	0.0488293	0.0581241	0.0921906	0.0438673	0.127681	0.136534	0.0189394	0.0152594	0.0326797	0.0231788	0.0159119	0.0255864	0.0243572	0.0145935	0.00924415	0.0158103	0.00813008	0.00802265	0.0120603	0.00609756	0.011236	0.019305
GLYMA_04G018500	GLYMA_04G018500	0.266781	0.243772	0.621875	0.239262	0.733734	0.451579	0.404807	0.27817	0.251253	0.196905	0.309873	0.371411	0.246218	0.467625	0.39201	0.386417	0.0401515	0.0483215	0.156863	0.0298013	0.103427	0.0682303	0.0757781	0.0604587	0.0462208	0.0329381	0.0569106	0.0438886	0.0462312	0.0914634	0.0337079	0.0733591
GLYMA_20G229100	GLYMA_20G229100	1.08096	1.07246	1.04469	0.783611	1.95574	1.51879	1.59616	1.2634	1.3442	1.8445	2.91954	1.84051	1.45249	2.26139	2.28918	1.73324	0.157576	0.186673	0.261438	0.109272	0.261322	0.240938	0.26387	0.243919	0.232735	0.264822	0.308943	0.206701	0.207035	0.390244	0.235955	0.254826
GLYMA_02G102400	GLYMA_02G102400	0.313771	0.200441	0.10833	0.117303	0.262684	0.160216	0.265494	0.403424	0.205546	0.246391	0.314393	0.34357	0.246162	0.210485	0.115973	0.309461	0.0477273	0.0452696	0.0326797	0.0198675	0.0458996	0.0277186	0.0649526	0.103544	0.050571	0.0421607	0.0487805	0.041529	0.0422111	0.0670732	0.0224719	0.0501931
GLYMA_10G266000	GLYMA_10G266000	0.72522	0.775568	0.428507	1.00532	0.590142	0.520636	0.917973	0.895233	0.947685	0.978192	0.752792	0.608406	1.59549	0.637105	0.853933	0.887124	0.109848	0.134283	0.117647	0.139073	0.0875153	0.0916844	0.156969	0.172342	0.168026	0.14361	0.113821	0.0698443	0.194975	0.103659	0.123596	0.142857
GLYMA_12G201100	GLYMA_12G201100	1.39533	1.82374	0.740691	0.984674	1.26341	1.23639	1.73659	1.64943	2.64198	2.7576	2.11134	1.94916	2.3682	1.79589	1.41311	1.61755	0.179545	0.258393	0.143791	0.119205	0.156059	0.189765	0.257104	0.257123	0.358891	0.330698	0.235772	0.205757	0.281407	0.22561	0.146067	0.216216
GLYMA_13G288200	GLYMA_13G288200	0.333567	0.41687	0.401939	0.341803	0.426683	0.279744	0.448756	0.399273	0.452395	0.395507	0.283332	0.404245	0.439808	0.392676	0.237196	0.883052	0.0598485	0.0829095	0.0849673	0.0629139	0.0636475	0.0660981	0.100135	0.085476	0.0946166	0.0606061	0.0650407	0.047664	0.0703518	0.0853659	0.0224719	0.108108
GLYMA_12G052400	GLYMA_12G052400	0.742457	0.953896	0.467207	1.14694	0.656632	0.668285	0.871124	0.744033	0.751365	0.629298	0.462241	0.628379	0.498214	0.308102	0.597394	0.344089	0.111364	0.161241	0.143791	0.135762	0.0899633	0.115139	0.170501	0.152189	0.137575	0.0988142	0.0731707	0.0769231	0.079397	0.0914634	0.0449438	0.0772201
GLYMA_15G115400	GLYMA_15G115400	0.358837	0.251868	0.191183	0.155702	0.333408	0.457814	0.354495	0.453932	0.379933	0.478354	0.306968	0.324113	0.526173	0.265777	0.376805	0.579341	0.0537879	0.051882	0.0392157	0.0231788	0.0507956	0.0788913	0.0730717	0.0938151	0.0766721	0.0790514	0.0650407	0.0410571	0.0753769	0.0609756	0.0674157	0.0772201
GLYMA_03G100800	GLYMA_03G100800	0.28116	0.361639	0.15341	0.254394	0.270315	0.38189	0.321519	0.351863	0.416659	0.323184	0.13967	0.414055	0.268979	0.141444	0.51962	0.499692	0.0439394	0.0747711	0.0457516	0.0364238	0.0410037	0.0597015	0.0663058	0.0778318	0.0777597	0.0527009	0.0243902	0.0481359	0.0492462	0.0365854	0.0561798	0.0926641
GLYMA_06G240100	GLYMA_06G240100	0.69863	0.825685	0.2362	0.512062	0.701749	0.435582	0.714325	0.615419	0.730416	0.655526	0.686736	0.878375	0.742248	0.374928	0.459466	0.444736	0.108333	0.14293	0.0718954	0.0662252	0.105875	0.0895522	0.14479	0.122307	0.139206	0.0909091	0.105691	0.0976876	0.116583	0.103659	0.0674157	0.0772201
GLYMA_20G000700	GLYMA_20G000700	0.584887	0.484462	0.415566	0.387998	0.867104	0.749536	0.496687	0.546622	0.532311	0.624353	0.664687	0.596434	0.637798	0.233237	0.760371	0.570124	0.0833333	0.0834181	0.0980392	0.0629139	0.111383	0.123667	0.0920162	0.101459	0.0995106	0.0843215	0.0813008	0.0731477	0.0884422	0.0792683	0.0898876	0.0694981
GLYMA_13G326900	GLYMA_13G326900	0.299124	0.258818	0.244175	0.432797	0.394949	0.424185	0.259917	0.185768	0.194934	0.213796	0.304689	0.2795	0.308754	0.206324	0.116435	0.192917	0.0416667	0.0467955	0.0980392	0.0596026	0.0691554	0.0724947	0.0433018	0.0423905	0.0353453	0.0329381	0.0406504	0.0335064	0.0442211	0.0304878	0.011236	0.023166
GLYMA_06G161100	GLYMA_06G161100	1.0789	1.00449	0.529421	0.448096	1.66477	1.55508	0.887946	0.736197	1.06265	0.890295	0.506195	1.31253	1.30909	0.479648	0.873045	0.927837	0.140152	0.144964	0.124183	0.0596026	0.192778	0.228145	0.14885	0.117443	0.168026	0.121212	0.0894309	0.138273	0.164824	0.0792683	0.0898876	0.123552
GLYMA_19G226200	GLYMA_19G226200	0.41394	0.442083	0.705904	0.554374	0.390639	0.370972	0.454141	0.376337	0.377202	0.327157	0.514351	0.318647	0.342454	0.190007	0.692234	0.422787	0.0666667	0.0885046	0.176471	0.0794702	0.0636475	0.0533049	0.0893099	0.0820014	0.0831974	0.0487484	0.0569106	0.0386975	0.0552764	0.0426829	0.0786517	0.0656371
GLYMA_12G007800	GLYMA_12G007800	0.653196	0.566083	0.28886	0.25348	0.724187	0.540292	0.769785	0.439864	0.941451	0.851932	0.704098	0.727675	0.776979	0.324103	0.510785	0.830913	0.0984848	0.106307	0.0784314	0.0397351	0.108935	0.10661	0.158322	0.110493	0.182708	0.135705	0.113821	0.0915526	0.121608	0.0853659	0.0786517	0.123552
GLYMA_03G235100	GLYMA_03G235100	0.290603	0.236276	0.518543	0.265722	0.320773	0.319824	0.243411	0.198132	0.206658	0.229824	0.399651	0.309362	0.190554	0.379653	0.30735	0.139625	0.0424242	0.0493388	0.130719	0.0364238	0.0550796	0.0703625	0.0663058	0.0430855	0.0429581	0.0447958	0.0569106	0.0386975	0.0331658	0.0670732	0.0449438	0.0501931
GLYMA_18G156300	GLYMA_18G156300	0.614027	0.61841	0.561316	0.646854	0.574423	0.32906	0.397488	0.633936	0.561168	0.783795	1.0479	0.714142	0.564674	0.570588	1.22205	0.601496	0.0901515	0.10529	0.137255	0.0860927	0.0838433	0.0639659	0.0811908	0.117443	0.103317	0.104084	0.105691	0.0854176	0.0894472	0.121951	0.134831	0.100386
GLYMA_08G201600	GLYMA_08G201600	0.343415	0.167821	0.231156	0.161137	0.231639	0.296467	0.196278	0.190024	0.105247	0.238013	0.220782	0.30004	0.245033	0.0925008	0.231854	0.208896	0.0522727	0.0315361	0.0718954	0.0298013	0.0428397	0.0533049	0.037889	0.0458652	0.0222947	0.0355731	0.0325203	0.0410571	0.0371859	0.0243902	0.0449438	0.03861
GLYMA_17G073500	GLYMA_17G073500	0.550236	0.591968	0.503421	0.619789	0.397955	0.227257	0.603048	0.449989	0.496235	0.51252	0.34442	0.457111	0.690479	0.351607	0.683319	0.843558	0.0931818	0.110885	0.130719	0.0860927	0.0667075	0.0490405	0.11908	0.100764	0.0978793	0.083004	0.0487805	0.0528551	0.0994975	0.0792683	0.0898876	0.131274
GLYMA_06G019900	GLYMA_06G019900	0.806568	1.22139	0.407756	1.24202	0.607635	0.5302	1.44707	0.808309	0.96151	0.389913	0.607028	0.737475	0.519719	0.412867	0.993004	0.715983	0.125758	0.19176	0.0653595	0.152318	0.0930233	0.0852878	0.212449	0.160528	0.169114	0.0606061	0.113821	0.0792827	0.0763819	0.0792683	0.123596	0.11583
GLYMA_05G209900	GLYMA_05G209900	0.395916	0.385782	0.759824	0.282885	0.577976	0.496637	0.219655	0.436397	0.228861	0.247413	0.204759	0.504458	0.404344	0.355454	0.637658	0.33041	0.069697	0.0656155	0.183007	0.0364238	0.0954712	0.102345	0.0460081	0.0847811	0.0467645	0.0342556	0.0406504	0.0604059	0.0673367	0.0853659	0.0674157	0.0579151
GLYMA_19G076300	GLYMA_19G076300	0.415925	0.470711	0.315588	0.274133	0.52734	0.887133	0.402541	0.455276	0.803717	0.540311	0.644328	0.555997	0.609698	0.270462	0.239097	0.475963	0.0666667	0.0869786	0.0653595	0.0331126	0.0826193	0.1258	0.0798376	0.0868659	0.151169	0.0895916	0.121951	0.0622935	0.0884422	0.0792683	0.0337079	0.0733591
GLYMA_06G000300	GLYMA_06G000300	0.603382	0.659329	0.94907	0.832485	0.620372	0.527508	0.724502	0.592523	0.617654	0.654728	0.893724	0.652804	0.602003	0.625596	0.255853	0.409358	0.0984848	0.121058	0.248366	0.115894	0.0997552	0.104478	0.138024	0.127172	0.126699	0.100132	0.105691	0.0802265	0.0854271	0.115854	0.0561798	0.0579151
GLYMA_11G081200	GLYMA_11G081200	0.69157	0.715896	0.22357	0.616166	0.788313	0.806178	0.829079	0.61506	0.498583	0.5135	0.798917	0.697321	0.625113	0.724047	0.462396	0.421584	0.105303	0.116989	0.0718954	0.0860927	0.108935	0.136461	0.140731	0.109798	0.0918978	0.0803689	0.130081	0.0802265	0.0824121	0.121951	0.0449438	0.0926641
GLYMA_17G044000	GLYMA_17G044000	0.951762	0.845224	2.23235	0.965311	2.33777	2.10441	0.898941	1.11995	1.03308	1.59847	1.60546	1.67504	1.25837	2.69201	2.61183	0.726172	0.130303	0.137843	0.411765	0.145695	0.280906	0.287846	0.131258	0.197359	0.175095	0.218709	0.243902	0.177914	0.164824	0.359756	0.224719	0.127413
GLYMA_04G253700	GLYMA_04G253700	0.142068	0.179956	0.129713	0.254449	0.26551	0.134588	0.129998	0.157225	0.181749	0.130935	0.195452	0.229463	0.167298	0.212627	0.0800852	0.296867	0.025	0.0386572	0.0522876	0.0397351	0.0465116	0.0341151	0.0243572	0.0368311	0.0358891	0.0289855	0.0406504	0.0287872	0.0271357	0.0426829	0.011236	0.0733591
GLYMA_06G077900	GLYMA_06G077900	0.259812	0.232931	0.257996	0.159153	0.281719	0.227441	0.3362	0.318898	0.380336	0.481208	0.136835	0.330519	0.269363	0.129829	0.309897	0.4277	0.044697	0.0447609	0.0784314	0.0298013	0.0446756	0.0490405	0.0730717	0.0722724	0.0761283	0.0816864	0.0243902	0.0420009	0.0462312	0.0426829	0.0449438	0.0579151
GLYMA_05G111900	GLYMA_05G111900	0.594045	0.375786	0.669281	0.521542	0.40112	0.472132	0.434051	0.425028	0.34401	0.40558	0.283242	0.393911	0.320424	0.180608	0.6599	0.401723	0.0886364	0.0676501	0.124183	0.0662252	0.0660955	0.0788913	0.0784844	0.085476	0.0647091	0.0685112	0.0406504	0.047664	0.0592965	0.0670732	0.0786517	0.0733591
GLYMA_03G004900	GLYMA_03G004900	0.799882	0.952779	0.30819	0.960147	0.901893	0.868511	0.904687	0.935678	1.14175	1.05912	0.550843	1.0979	0.850202	0.555359	0.389063	0.797094	0.12197	0.168871	0.124183	0.109272	0.138923	0.147122	0.185386	0.195969	0.207178	0.172596	0.105691	0.129306	0.128643	0.128049	0.0449438	0.131274
GLYMA_15G058400	GLYMA_15G058400	0.181315	0.148157	0.0591562	0.126411	0.172501	0.171136	0.219136	0.122479	0.13774	0.147152	0.186208	0.109474	0.173311	0.173116	0.0779192	0.182258	0.0310606	0.0310275	0.0261438	0.0264901	0.0324357	0.0277186	0.0473613	0.0319666	0.0271887	0.0210804	0.0325203	0.0155734	0.0251256	0.0487805	0.011236	0.023166
GLYMA_03G027500	GLYMA_03G027500	0.740662	0.458479	0.247572	0.249358	0.60711	0.531696	0.288822	0.431671	0.352437	0.279218	0.570653	0.63395	0.588516	0.543442	0.199946	0.548207	0.0931818	0.0854527	0.0849673	0.0463576	0.0820073	0.100213	0.0541272	0.0938151	0.0587276	0.0500659	0.0894309	0.0802265	0.0874372	0.115854	0.0224719	0.0772201
GLYMA_16G149800	GLYMA_16G149800	0.111395	0.122679	0.0735617	0.107605	0.148295	0.199823	0.126018	0.0757665	0.13755	0.163324	0.208793	0.196734	0.12245	0.145079	0.188207	0.0563755	0.0227273	0.0274669	0.0326797	0.0165563	0.0281518	0.0405117	0.0338295	0.0243224	0.0282762	0.0289855	0.0243902	0.0221803	0.0231156	0.0304878	0.011236	0.023166
GLYMA_07G107900	GLYMA_07G107900	0.116974	0.114199	0.0710848	0.243951	0.22317	0.107045	0.127248	0.104182	0.0936546	0.135638	0.0866138	0.156742	0.0977264	0.163278	0.121865	0.0658787	0.019697	0.0198372	0.0261438	0.0198675	0.0428397	0.0234542	0.0230041	0.0298819	0.0206634	0.0197628	0.0162602	0.0193487	0.0190955	0.0304878	0.011236	0.023166
GLYMA_04G111600	GLYMA_04G111600	0.517133	0.443324	0.831993	0.824995	0.488312	0.460917	0.578883	0.565821	0.36886	0.311708	0.224685	0.448581	0.292414	0.542774	0.430491	0.452892	0.0825758	0.0768057	0.24183	0.089404	0.0875153	0.0895522	0.0920162	0.119527	0.0766721	0.0513834	0.0406504	0.0580462	0.0572864	0.128049	0.0561798	0.0888031
GLYMA_13G360900	GLYMA_13G360900	0.47099	0.562897	0.360088	0.316377	0.894934	0.85673	0.637964	0.482076	0.472783	0.623771	0.990004	0.670593	0.543066	0.369865	1.17115	0.589456	0.0704545	0.0915565	0.111111	0.0430464	0.117503	0.140725	0.112314	0.0945101	0.0886351	0.100132	0.138211	0.0849457	0.081407	0.0853659	0.101124	0.100386
GLYMA_07G200800	GLYMA_07G200800	0.271539	0.299422	0.402736	0.24943	0.244641	0.108799	0.22407	0.244785	0.192815	0.193993	0.176587	0.215012	0.266549	0.248869	0.146301	0.186658	0.0393939	0.0595117	0.124183	0.0231788	0.0434517	0.021322	0.0473613	0.0562891	0.0494834	0.0329381	0.0325203	0.0325625	0.0422111	0.0609756	0.011236	0.03861
GLYMA_03G019600	GLYMA_03G019600	0.212889	0.159739	0.123523	0.171322	0.23455	0.150802	0.167493	0.150125	0.15187	0.0659824	0.244208	0.185194	0.175157	0.164705	0.212271	0.104538	0.030303	0.0289929	0.0196078	0.0231788	0.0299878	0.0277186	0.0324763	0.0312717	0.0320827	0.0118577	0.0325203	0.0221803	0.0231156	0.0304878	0.0337079	0.030888
GLYMA_03G222900	GLYMA_03G222900	0.300788	0.236781	0.429763	0.393568	0.32453	0.216862	0.193859	0.151234	0.166762	0.157071	0.144663	0.197254	0.161637	0.192933	0.155838	0.116122	0.0484848	0.0406918	0.104575	0.0430464	0.0520196	0.0383795	0.0473613	0.0319666	0.0353453	0.030303	0.00813008	0.0231241	0.0241206	0.054878	0.011236	0.023166
GLYMA_20G004000	GLYMA_20G004000	1.91666	1.93899	1.3291	0.846207	1.92922	1.50505	2.21265	2.00716	2.36809	2.81209	1.83525	2.315	2.02523	0.973209	0.759977	1.42972	0.248485	0.279247	0.261438	0.10596	0.231334	0.234542	0.326116	0.327311	0.355084	0.346509	0.227642	0.244455	0.258291	0.170732	0.146067	0.204633
GLYMA_11G214700	GLYMA_11G214700	0.363974	0.340046	0.268125	0.236888	0.542847	0.614609	0.572269	0.442258	0.493879	0.395054	0.166222	0.484463	0.588527	0.387515	0.544745	0.522376	0.055303	0.0676501	0.0784314	0.0331126	0.0838433	0.113006	0.101488	0.0986796	0.0951604	0.0724638	0.0325203	0.0618216	0.0864322	0.0853659	0.0561798	0.0694981
GLYMA_19G152000	GLYMA_19G152000	0.327017	0.549348	0.416474	0.211492	0.19917	0.211625	0.467843	0.445786	0.372493	0.318012	0.190138	0.27225	0.240913	0.148641	0.311265	0.321553	0.0575758	0.0996948	0.0915033	0.0264901	0.0299878	0.0383795	0.0987821	0.0965949	0.0804785	0.0395257	0.0325203	0.0353941	0.0422111	0.0426829	0.0337079	0.046332
GLYMA_15G098100	GLYMA_15G098100	0.222726	0.13831	0.113553	0.260362	0.212408	0.253898	0.316304	0.300216	0.419664	0.256216	0.269424	0.364086	0.240292	0.220002	0.249171	0.158148	0.0386364	0.0223805	0.0392157	0.0298013	0.0330477	0.0447761	0.0581867	0.0555942	0.0788472	0.0316206	0.0325203	0.0368098	0.0341709	0.0365854	0.0337079	0.030888
GLYMA_17G125500	GLYMA_17G125500	2.92374	2.91734	3.2671	2.72261	2.66535	2.11351	2.97935	2.65008	2.38866	2.28155	3.40634	2.40931	1.63483	2.13158	0.9217	1.41343	0.331818	0.365717	0.542484	0.274834	0.309058	0.283582	0.395129	0.382905	0.344753	0.274045	0.398374	0.232185	0.219095	0.365854	0.146067	0.220077
GLYMA_06G255200	GLYMA_06G255200	0.255479	0.165259	0.364317	0.20248	0.335155	0.154233	0.318076	0.225069	0.187967	0.259909	0.121537	0.272003	0.0985837	0.275146	0.0993453	0.208287	0.05	0.0386572	0.117647	0.0364238	0.0544676	0.0298507	0.0622463	0.0486449	0.0391517	0.0395257	0.0325203	0.0287872	0.0221106	0.054878	0.011236	0.046332
GLYMA_14G074900	GLYMA_14G074900	0.310519	0.29529	0.254998	0.647466	0.434173	0.68932	0.324533	0.35107	0.247343	0.368753	0.410354	0.45497	0.407931	0.829444	0.368861	0.224482	0.0522727	0.0523906	0.0718954	0.0728477	0.0789474	0.132196	0.0581867	0.0785268	0.0570962	0.0619236	0.0569106	0.0556866	0.0663317	0.189024	0.0337079	0.042471
GLYMA_19G191600	GLYMA_19G191600	0.763019	0.680825	0.220564	0.709725	0.572838	0.626259	0.5803	0.656681	0.51573	0.81477	0.526178	0.808676	0.638275	0.610857	0.52955	0.657964	0.112879	0.118515	0.0849673	0.0827815	0.0942472	0.104478	0.113667	0.125782	0.100598	0.12253	0.0813008	0.0948561	0.100503	0.121951	0.0674157	0.0965251
GLYMA_20G019400	GLYMA_20G019400	0.16596	0.27913	0.156945	0.145982	0.208237	0.222975	0.291912	0.332405	0.330618	0.315548	0.211078	0.268146	0.241762	0.471463	0.127681	0.390552	0.0333333	0.0564598	0.0261438	0.0165563	0.0354957	0.0426439	0.0622463	0.0722724	0.0723219	0.0527009	0.0406504	0.035866	0.040201	0.054878	0.011236	0.0540541
GLYMA_14G136700	GLYMA_14G136700	1.18644	0.94636	0.477706	0.792137	1.41016	1.12764	0.926827	1.04478	1.07445	1.46736	1.43562	1.7638	1.31339	1.11752	0.976727	0.891672	0.153788	0.147508	0.111111	0.0927152	0.186659	0.200426	0.161028	0.18763	0.165307	0.175231	0.178862	0.190656	0.168844	0.170732	0.134831	0.131274
GLYMA_07G010300	GLYMA_07G010300	0.355045	0.33399	0.239173	0.312727	0.50961	0.43782	0.452981	0.402515	0.424845	0.436578	0.565168	0.454007	0.5624	0.717195	0.882911	0.32016	0.0613636	0.0630722	0.0915033	0.0463576	0.0783354	0.0724947	0.0852503	0.0924253	0.0831974	0.0698287	0.0650407	0.0580462	0.0753769	0.134146	0.0786517	0.0617761
GLYMA_14G035400	GLYMA_14G035400	0.360388	0.327493	0.333173	0.245394	0.69155	0.82886	0.383482	0.458686	0.356489	0.90587	0.413525	0.7384	0.711769	0.724903	0.663226	0.333457	0.0515152	0.0595117	0.111111	0.0298013	0.105263	0.149254	0.0744249	0.0917304	0.0647091	0.139657	0.0731707	0.08353	0.106533	0.182927	0.11236	0.0579151
GLYMA_07G203600	GLYMA_07G203600	0.525466	0.747914	0.317005	0.306034	0.636912	0.605099	0.652641	0.626968	0.661765	0.659673	0.549909	0.65416	0.584048	0.634238	1.12971	0.70362	0.0893939	0.130214	0.117647	0.0529801	0.0887393	0.113006	0.124493	0.143155	0.121805	0.100132	0.0813008	0.0811704	0.0944724	0.140244	0.146067	0.123552
GLYMA_04G189600	GLYMA_04G189600	1.01279	0.895474	0.584515	0.879036	0.974783	0.841234	1.41196	1.12935	1.59299	1.47306	0.431565	1.2165	1.35784	1.20012	1.34409	1.01395	0.137879	0.158698	0.169935	0.109272	0.141371	0.134328	0.224628	0.206393	0.25503	0.209486	0.0813008	0.127419	0.190955	0.22561	0.134831	0.177606
GLYMA_07G116900	GLYMA_07G116900	2.40313	2.4737	1.06788	1.96988	3.15012	3.27087	2.48979	2.15679	2.84125	2.8069	3.59598	3.94042	3.34365	2.91173	1.85936	1.91009	0.290152	0.331638	0.163399	0.211921	0.339045	0.396588	0.358593	0.3287	0.382817	0.339921	0.357724	0.348277	0.359799	0.408537	0.202247	0.289575
GLYMA_10G175300	GLYMA_10G175300	0.93881	1.02178	0.68797	1.8542	0.716591	0.700486	1.04108	0.945038	0.807208	0.918158	0.502609	0.85131	0.778596	1.15301	0.755144	0.714022	0.146212	0.177518	0.176471	0.182119	0.116279	0.110874	0.190798	0.185546	0.160413	0.14361	0.0894309	0.103351	0.118593	0.219512	0.123596	0.104247
GLYMA_09G196100	GLYMA_09G196100	0.211574	0.233272	0.652548	0.176895	0.647042	0.414232	0.244022	0.242219	0.226569	0.236328	0.279623	0.444456	0.177449	0.342034	0.647131	0.557265	0.0340909	0.0437436	0.143791	0.0231788	0.107711	0.0916844	0.0541272	0.0583739	0.0445895	0.0447958	0.0406504	0.0514394	0.0311558	0.0731707	0.0561798	0.0849421
GLYMA_08G067100	GLYMA_08G067100	0.495538	0.447114	0.212464	0.414177	0.424621	0.511804	0.783584	0.344606	0.465067	0.358648	0.375419	0.31017	0.458315	0.344892	0.22242	0.602075	0.0742424	0.0752798	0.0522876	0.0629139	0.0624235	0.0895522	0.156969	0.0674079	0.0891789	0.0566535	0.0569106	0.0424729	0.0673367	0.0609756	0.0337079	0.0888031
GLYMA_09G256700	GLYMA_09G256700	0.571562	0.426307	0.69751	0.485359	0.770991	0.695967	0.310075	0.454259	0.356973	0.573271	0.688645	0.628529	0.490888	1.12006	0.433135	0.303753	0.0757576	0.0747711	0.143791	0.0562914	0.123623	0.130064	0.0635995	0.0945101	0.0657966	0.0895916	0.0731707	0.0736196	0.0683417	0.219512	0.0561798	0.0501931
GLYMA_02G268600	GLYMA_02G268600	0.222648	0.139891	0.206934	0.224015	0.182642	0.1661	0.107797	0.160941	0.120961	0.183977	0.0996671	0.180948	0.12857	0.170828	0.128246	0.0607625	0.0348485	0.0300102	0.0522876	0.0264901	0.0312118	0.0362473	0.0189445	0.0410007	0.0244698	0.027668	0.0162602	0.0221803	0.0221106	0.0243902	0.0224719	0.019305
GLYMA_17G024500	GLYMA_17G024500	0.21729	0.173762	0.212409	0.134478	0.296171	0.204706	0.224156	0.186957	0.239676	0.336395	0.237693	0.495773	0.371876	0.157194	0.407402	0.296922	0.0340909	0.0320448	0.0457516	0.0198675	0.0391677	0.0426439	0.0419486	0.0361362	0.0429581	0.0474308	0.0243902	0.0547428	0.0542714	0.0426829	0.0337079	0.0540541
GLYMA_03G185200	GLYMA_03G185200	0.482002	0.313559	0.303647	0.344668	0.427338	0.543213	0.305727	0.56265	0.339444	0.603636	0.488932	0.612304	0.693081	0.354806	0.188058	0.406704	0.0742424	0.069176	0.0980392	0.0562914	0.0764994	0.08742	0.0608931	0.125782	0.0663404	0.0974967	0.0813008	0.0750354	0.108543	0.097561	0.0337079	0.0733591
GLYMA_09G167100	GLYMA_09G167100	1.14292	0.661172	0.435462	0.756028	1.25586	1.41166	0.654734	1.22197	0.77989	0.785692	0.77371	1.45265	1.3857	1.11392	1.16841	1.60421	0.140152	0.104781	0.150327	0.0960265	0.165239	0.206823	0.112314	0.202919	0.131049	0.0948617	0.121951	0.151015	0.168844	0.170732	0.123596	0.227799
GLYMA_18G130500	GLYMA_18G130500	0.189766	0.208462	0.183428	0.0958628	0.213515	0.131387	0.350383	0.203139	0.299123	0.238862	0.353066	0.26011	0.132072	0.246502	0.300127	0.140568	0.0310606	0.0386572	0.0392157	0.0198675	0.0318237	0.0277186	0.0649526	0.0486449	0.0609027	0.0382082	0.0406504	0.0292591	0.0201005	0.0426829	0.0337079	0.027027
GLYMA_08G193400	GLYMA_08G193400	0.394991	0.312999	0.31213	0.223712	0.598066	0.490671	0.460903	0.371515	0.478094	0.381071	0.262104	0.563194	0.366223	0.823721	0.772477	0.627659	0.0598485	0.0615463	0.111111	0.0364238	0.0875153	0.0852878	0.104195	0.085476	0.103317	0.0566535	0.0487805	0.0674847	0.0552764	0.128049	0.0786517	0.0965251
GLYMA_09G202100	GLYMA_09G202100	0.319303	0.468321	0.167418	0.181838	0.365042	0.247887	0.538112	0.402788	0.435004	0.396454	0.616393	0.38957	0.42903	0.325534	0.609328	0.526904	0.0515152	0.0874873	0.0457516	0.0231788	0.0507956	0.0426439	0.101488	0.0792217	0.0870038	0.0645586	0.0731707	0.047664	0.0582915	0.054878	0.0561798	0.0772201
GLYMA_04G116700	GLYMA_04G116700	0.423771	0.490987	0.221428	0.372075	0.421734	0.506631	0.814914	0.513787	0.715337	0.648388	0.666279	0.500834	0.512108	0.737326	0.50282	0.773449	0.0734848	0.0859613	0.0784314	0.0364238	0.0691554	0.0810235	0.162382	0.108409	0.132137	0.088274	0.0731707	0.0571024	0.079397	0.128049	0.0561798	0.111969
GLYMA_12G165900	GLYMA_12G165900	0.637426	0.668597	1.09798	0.799463	0.635655	0.533544	0.467599	0.488999	0.409149	0.690827	0.402463	0.65853	0.596769	0.473869	0.298388	0.539071	0.0909091	0.107325	0.24183	0.119205	0.0856793	0.08742	0.0920162	0.0986796	0.0734095	0.113307	0.0650407	0.077395	0.0894472	0.0792683	0.0224719	0.0617761
GLYMA_17G123000	GLYMA_17G123000	0.085937	0.0643272	0.0474274	0.0979456	0.153949	0.0737057	0.0470408	0.0572178	0.105972	0.146548	0.0418429	0.128047	0.0526123	0.0770928	0.116435	0.0743772	0.0136364	0.0157681	0.0261438	0.0165563	0.0275398	0.0149254	0.0135318	0.0118138	0.0184883	0.0289855	0.00813008	0.0169891	0.0110553	0.0304878	0.011236	0.011583
GLYMA_14G085900	GLYMA_14G085900	0.174021	0.207252	0.0920148	0.167809	0.195995	0.262719	0.191092	0.183699	0.234118	0.17031	0.280244	0.155718	0.223604	0.160388	0.256202	0.338379	0.0310606	0.0417091	0.0326797	0.0165563	0.0379437	0.0618337	0.0392422	0.0410007	0.0413268	0.0316206	0.0243902	0.0226522	0.0351759	0.0304878	0.0224719	0.042471
GLYMA_04G237000	GLYMA_04G237000	0.22721	0.185581	0.128388	0.185603	0.382404	0.320097	0.445304	0.242525	0.261732	0.231141	0.257547	0.44226	0.249567	0.208575	0.35014	0.472006	0.0416667	0.0350966	0.0326797	0.0264901	0.0630355	0.0682303	0.0784844	0.0611536	0.0483959	0.0382082	0.0243902	0.0566305	0.0432161	0.054878	0.0449438	0.0810811
GLYMA_20G186800	GLYMA_20G186800	0.349761	0.341137	0.198327	0.459252	0.265838	0.251851	0.454429	0.247621	0.295813	0.24298	0.487486	0.257107	0.269056	0.385371	0.728509	0.412605	0.0590909	0.0686673	0.0849673	0.0662252	0.0489596	0.0469083	0.0920162	0.0542043	0.0706906	0.0447958	0.0487805	0.0372817	0.039196	0.0731707	0.0898876	0.0617761
GLYMA_02G080500	GLYMA_02G080500	0.365723	0.345306	0.362383	0.311584	0.544072	0.469015	0.447784	0.370839	0.480377	0.348442	0.534274	0.394509	0.392493	0.307564	0.148124	0.301563	0.0583333	0.069176	0.130719	0.0496689	0.0783354	0.0746269	0.0838972	0.0729673	0.096248	0.055336	0.0731707	0.0462482	0.0613065	0.0487805	0.0224719	0.03861
GLYMA_05G006000	GLYMA_05G006000	0.342484	0.214867	0.241534	0.225875	0.427547	0.39294	0.367276	0.241621	0.207719	0.468492	0.168448	0.392013	0.367747	0.293134	0.483204	0.618711	0.0469697	0.0412004	0.0588235	0.0298013	0.0587515	0.0533049	0.0649526	0.0528145	0.0375204	0.0619236	0.0325203	0.0434167	0.0522613	0.054878	0.0449438	0.100386
GLYMA_05G141900	GLYMA_05G141900	0.175559	0.269344	0.281658	0.628856	0.239887	0.178445	0.3811	0.269498	0.224569	0.171237	0.212306	0.276675	0.217878	0.36401	0.24072	0.235334	0.0310606	0.0513733	0.0980392	0.0827815	0.0403917	0.0383795	0.0757781	0.0514246	0.0543774	0.027668	0.0325203	0.0363379	0.0331658	0.0853659	0.0224719	0.042471
GLYMA_15G163900	GLYMA_15G163900	0.853677	1.10838	0.301882	0.863918	0.466168	0.44405	1.01092	0.765582	0.892911	0.683445	0.744387	0.683664	0.625498	0.527709	0.303744	0.678548	0.125	0.182096	0.0980392	0.0927152	0.0636475	0.0788913	0.169147	0.154274	0.170201	0.110672	0.105691	0.0825861	0.0894472	0.0853659	0.0561798	0.119691
GLYMA_08G207300	GLYMA_08G207300	0.275147	0.257927	0.516491	0.245727	0.501218	0.389455	0.247862	0.250034	0.273852	0.323194	0.46531	0.331074	0.21872	0.803045	0.279475	0.274919	0.0416667	0.043235	0.104575	0.0298013	0.0905753	0.0660981	0.0581867	0.047255	0.0511147	0.0421607	0.0487805	0.0396413	0.0321608	0.146341	0.0449438	0.0501931
GLYMA_15G166600	GLYMA_15G166600	0.633348	0.502084	0.257894	0.402916	0.844267	0.946721	0.391083	0.576497	0.478608	0.737847	0.915247	0.895341	0.658251	0.814819	0.320878	0.516097	0.0916667	0.0824008	0.0718954	0.0529801	0.125459	0.170576	0.0703654	0.127867	0.100598	0.118577	0.154472	0.105238	0.103518	0.182927	0.0561798	0.0926641
GLYMA_18G025500	GLYMA_18G025500	0.450902	0.841138	0.229162	0.521138	0.388962	0.271967	0.648885	0.480494	0.55558	0.520056	0.738204	0.384648	0.521905	0.673311	0.298109	0.631649	0.0742424	0.140895	0.0392157	0.0662252	0.0581395	0.0533049	0.124493	0.104934	0.103861	0.0843215	0.097561	0.0438886	0.080402	0.134146	0.0561798	0.0965251
GLYMA_10G210300	GLYMA_10G210300	0.285142	0.314524	0.42721	0.377173	0.50827	0.360473	0.246543	0.414429	0.235421	0.280187	0.163998	0.438872	0.210252	0.274801	0.601818	0.192549	0.0537879	0.0549339	0.111111	0.0496689	0.0856793	0.0660981	0.0405954	0.085476	0.0445895	0.0434783	0.0325203	0.0571024	0.041206	0.0609756	0.0337079	0.034749
GLYMA_06G220400	GLYMA_06G220400	0.303426	0.331604	0.131251	0.138496	0.254449	0.384937	0.33852	0.435938	0.3476	0.287921	0.481569	0.407696	0.429773	0.266775	0.39862	0.316944	0.0462121	0.0513733	0.0392157	0.0165563	0.0373317	0.0831557	0.0608931	0.0778318	0.0657966	0.0421607	0.0650407	0.047664	0.0552764	0.0670732	0.0337079	0.042471
GLYMA_04G003000	GLYMA_04G003000	0.540019	0.536258	0.190502	0.231012	0.535494	0.617707	0.484967	0.546279	0.484062	0.596794	0.619426	0.698675	0.665731	0.230543	0.440717	0.473205	0.0825758	0.0966429	0.0653595	0.0397351	0.0881273	0.104478	0.0920162	0.126477	0.0978793	0.100132	0.113821	0.0840019	0.0904523	0.0609756	0.0561798	0.0810811
GLYMA_20G180300	GLYMA_20G180300	0.391709	0.317594	0.258796	0.17956	0.453537	0.373232	0.208711	0.276328	0.123664	0.232249	0.310779	0.28518	0.228963	0.240672	0.399851	0.338628	0.0636364	0.0600203	0.0653595	0.0298013	0.0654835	0.0533049	0.0405954	0.0590688	0.0299076	0.0342556	0.0406504	0.0344502	0.0371859	0.0426829	0.0449438	0.0617761
GLYMA_19G024400	GLYMA_19G024400	0.729696	1.30081	0.538614	1.10544	0.687209	0.45564	1.39669	0.731317	1.67091	1.39998	0.523501	0.785988	1.06082	0.854164	1.42347	0.642898	0.114394	0.206511	0.143791	0.125828	0.104651	0.0852878	0.243572	0.136901	0.26808	0.201581	0.0813008	0.0929684	0.152764	0.158537	0.157303	0.0888031
GLYMA_04G094100	GLYMA_04G094100	0.088438	0.0922334	0.0563619	0.126759	0.119766	0.206647	0.118641	0.0814047	0.175485	0.128898	0.0663495	0.183838	0.152107	0.0727244	0.126247	0.0724671	0.0143939	0.0167854	0.0130719	0.0165563	0.0208078	0.0298507	0.0243572	0.019458	0.0293638	0.0210804	0.0162602	0.0245399	0.0241206	0.0243902	0.011236	0.015444
GLYMA_13G047900	GLYMA_13G047900	0.346063	0.349609	0.191338	0.312444	0.266899	0.263529	0.3782	0.388529	0.339292	0.39805	0.178859	0.372883	0.419156	0.655578	0.404521	0.322467	0.055303	0.0681587	0.0588235	0.0364238	0.0458996	0.0575693	0.0663058	0.0889507	0.0750408	0.0671937	0.0325203	0.0523832	0.0693467	0.128049	0.0561798	0.0579151
GLYMA_13G047700	GLYMA_13G047700	0.518259	0.512676	0.717758	0.207632	0.473272	0.37492	0.411703	0.473672	0.572717	0.523539	0.195846	0.465326	0.478615	0.394379	0.549471	0.387699	0.0863636	0.0925738	0.156863	0.0331126	0.0789474	0.0852878	0.082544	0.104934	0.123437	0.0790514	0.0325203	0.0698443	0.078392	0.0853659	0.0674157	0.100386
GLYMA_07G010200	GLYMA_07G010200	0.678801	0.25398	0.694581	0.798313	0.5052	0.493533	0.407876	0.393992	0.222647	0.477907	0.448134	0.717374	0.416878	0.407604	0.217826	0.584967	0.0924242	0.0498474	0.196078	0.0860927	0.0820073	0.08742	0.0838972	0.0945101	0.0500272	0.0790514	0.0650407	0.083058	0.0743719	0.103659	0.0337079	0.100386
GLYMA_20G110300	GLYMA_20G110300	0.69787	0.678245	0.732392	1.01209	1.22102	1.7117	0.669134	0.766597	0.467054	0.911759	0.659895	0.984533	0.866905	0.884563	1.10789	0.931026	0.0977273	0.105799	0.176471	0.0993377	0.161567	0.228145	0.120433	0.14107	0.079391	0.12253	0.097561	0.103351	0.113568	0.164634	0.11236	0.119691
GLYMA_02G091700	GLYMA_02G091700	0.350905	0.374948	0.194211	0.170986	0.43234	0.430883	0.401243	0.348731	0.324572	0.459504	0.467542	0.35909	0.305634	0.393248	0.155652	0.127589	0.0522727	0.069176	0.0718954	0.0264901	0.0648715	0.08742	0.082544	0.0701876	0.0663404	0.0698287	0.0731707	0.041529	0.0432161	0.0670732	0.0224719	0.027027
GLYMA_05G156500	GLYMA_05G156500	0.722213	1.17371	0.636172	0.967843	0.501531	0.617972	1.43439	0.968458	0.950219	0.662486	1.12427	0.479463	0.555544	0.617788	0.391568	0.542895	0.113636	0.197355	0.176471	0.125828	0.0862913	0.100213	0.219215	0.214038	0.177814	0.118577	0.138211	0.0637093	0.0964824	0.121951	0.0449438	0.0849421
GLYMA_20G202200	GLYMA_20G202200	0.489438	0.478111	0.520031	0.545802	0.327087	0.192386	0.379311	0.622653	0.422239	0.336476	0.169979	0.329435	0.487255	0.443566	0.382433	0.316839	0.0840909	0.084944	0.124183	0.0695364	0.0507956	0.0298507	0.0649526	0.128562	0.079391	0.0606061	0.0325203	0.0401133	0.0693467	0.0792683	0.0224719	0.0540541
GLYMA_12G169700	GLYMA_12G169700	0.313288	0.238154	0.466036	0.331823	0.405801	0.353937	0.256303	0.238311	0.218484	0.281938	0.283241	0.312776	0.316759	0.51383	0.277785	0.140283	0.0409091	0.0467955	0.104575	0.0496689	0.0654835	0.0597015	0.052774	0.056984	0.0451332	0.0421607	0.0406504	0.0405852	0.0532663	0.0914634	0.0224719	0.030888
GLYMA_03G209900	GLYMA_03G209900	0.21519	0.259919	0.291648	0.338447	0.238714	0.149328	0.225324	0.22329	0.193128	0.246379	0.106904	0.223585	0.176277	0.0924031	0.214662	0.224012	0.0272727	0.0564598	0.0784314	0.0463576	0.0410037	0.0298507	0.0433018	0.0535094	0.0396955	0.0434783	0.00813008	0.0306748	0.0291457	0.0243902	0.0224719	0.0617761
GLYMA_13G131300	GLYMA_13G131300	0.165416	0.130419	0.168216	0.0762185	0.279143	0.192813	0.166836	0.225368	0.131156	0.262191	0.233197	0.162078	0.15897	0.267318	0.192151	0.113268	0.0272727	0.0264496	0.0588235	0.0165563	0.0465116	0.0426439	0.0338295	0.0521195	0.0293638	0.0421607	0.0487805	0.0221803	0.0291457	0.054878	0.0337079	0.023166
GLYMA_04G138300	GLYMA_04G138300	0.247948	0.273624	0.175099	0.420067	0.343094	0.236297	0.192234	0.238119	0.204175	0.247845	0.302398	0.344994	0.114723	0.30838	0.330096	0.129227	0.0409091	0.0478128	0.0522876	0.0496689	0.0538556	0.0426439	0.0473613	0.0632384	0.0478521	0.0368906	0.0487805	0.0471921	0.0221106	0.054878	0.0337079	0.030888
GLYMA_04G010500	GLYMA_04G010500	0.471487	0.350016	0.278493	0.745489	0.404072	0.485475	0.252806	0.29529	0.203613	0.307603	0.237607	0.422219	0.309583	0.501203	0.355538	0.705285	0.0674242	0.0635809	0.0915033	0.0927152	0.0642595	0.0682303	0.0433018	0.0687978	0.0353453	0.0487484	0.0487805	0.0542709	0.0522613	0.109756	0.0449438	0.11583
GLYMA_08G236400	GLYMA_08G236400	0.549056	0.737994	0.881068	0.516875	1.06013	1.09013	0.728922	0.686206	0.707858	0.64092	0.40014	0.770504	0.495418	0.457868	0.297765	0.508965	0.080303	0.129705	0.169935	0.0794702	0.136475	0.159915	0.131258	0.14246	0.126156	0.0974967	0.0650407	0.0877773	0.0773869	0.0853659	0.0561798	0.0965251
GLYMA_13G215900	GLYMA_13G215900	0.731554	0.601417	0.308572	0.235865	0.503393	0.376892	0.53189	0.499862	0.633785	0.490141	0.585373	0.612342	0.485733	0.475283	0.199887	0.432878	0.105303	0.0991862	0.111111	0.0264901	0.0716034	0.0554371	0.108254	0.0938151	0.116368	0.088274	0.0813008	0.0670127	0.0703518	0.097561	0.0449438	0.0772201
GLYMA_07G043700	GLYMA_07G043700	1.12321	0.900788	0.409599	0.77464	1.25102	1.18821	0.735685	0.625326	1.03966	0.440638	1.21282	1.10625	0.732955	0.341918	0.623177	0.596694	0.141667	0.136317	0.0849673	0.0960265	0.143207	0.191898	0.132612	0.109798	0.162588	0.0737813	0.130081	0.115149	0.0904523	0.0609756	0.0674157	0.0733591
GLYMA_09G074300	GLYMA_09G074300	0.420545	0.631841	0.370928	0.638561	0.35589	0.304913	0.570895	0.381194	0.543586	0.269895	0.265954	0.360975	0.437797	0.510013	0.174527	0.328254	0.0621212	0.106307	0.0784314	0.0860927	0.0520196	0.0660981	0.110961	0.0833912	0.107123	0.0461133	0.0406504	0.0448325	0.0683417	0.103659	0.0337079	0.0656371
GLYMA_05G048200	GLYMA_05G048200	0.266602	0.229152	0.517357	0.186842	0.579056	0.41508	0.18722	0.260601	0.163467	0.216685	0.361703	0.418874	0.242829	0.427119	0.598009	0.17699	0.0378788	0.0427263	0.111111	0.0264901	0.0911873	0.0660981	0.0419486	0.0507297	0.0342577	0.0329381	0.0406504	0.0500236	0.0422111	0.097561	0.0561798	0.03861
GLYMA_17G168900	GLYMA_17G168900	0.537606	0.291996	0.46885	0.642168	0.209576	0.298299	0.344441	0.268232	0.272927	0.416534	0.622281	0.269059	0.289121	0.204714	0.232581	0.175553	0.0931818	0.0645982	0.143791	0.0960265	0.0293758	0.0533049	0.0635995	0.0590688	0.0587276	0.0816864	0.0731707	0.0344502	0.0502513	0.0731707	0.0449438	0.046332
GLYMA_01G110900	GLYMA_01G110900	0.130644	0.237511	0.342572	0.112323	0.185527	0.0936541	0.275778	0.151057	0.176743	0.122744	0.181272	0.170144	0.189258	0.208759	0.148075	0.189046	0.0204545	0.0447609	0.0718954	0.0198675	0.0373317	0.0191898	0.0595399	0.0368311	0.040783	0.0263505	0.0325203	0.0259556	0.0351759	0.0426829	0.0337079	0.034749
GLYMA_06G292800	GLYMA_06G292800	0.25535	0.325756	0.240521	0.389868	0.172306	0.163942	0.503845	0.362417	0.293047	0.272828	0.137792	0.158641	0.157911	0.226295	0.375036	0.185538	0.0424242	0.0630722	0.0653595	0.0529801	0.0250918	0.0341151	0.0947226	0.0806115	0.0657966	0.0527009	0.0406504	0.0202926	0.0291457	0.0609756	0.0561798	0.034749
GLYMA_07G269000	GLYMA_07G269000	0.548673	0.529046	0.601799	0.556951	0.46543	0.597639	0.412653	0.511274	0.456909	0.569476	0.580926	0.522429	0.48428	0.242555	0.164639	0.550422	0.0787879	0.101729	0.156863	0.0695364	0.0777234	0.0916844	0.0730717	0.109104	0.0924415	0.0974967	0.105691	0.0613497	0.0753769	0.0609756	0.0224719	0.0965251
GLYMA_10G024300	GLYMA_10G024300	0.845805	0.359334	0.298709	1.09173	0.33603	0.581171	0.412935	0.335645	0.32777	0.327659	0.334956	0.41136	0.343648	0.389502	0.689474	0.403911	0.111364	0.0656155	0.0980392	0.13245	0.0575275	0.098081	0.0838972	0.0681028	0.0603589	0.0527009	0.0487805	0.0509674	0.0603015	0.0914634	0.101124	0.0617761
GLYMA_18G288000	GLYMA_18G288000	0.253941	0.290627	0.176094	0.178105	0.43771	0.380226	0.258179	0.32672	0.192276	0.275365	0.229601	0.450615	0.315741	0.182378	0.312153	0.123295	0.0424242	0.0513733	0.0457516	0.0264901	0.0618115	0.0703625	0.0568336	0.0750521	0.0402393	0.0540184	0.0406504	0.0500236	0.0492462	0.0426829	0.0337079	0.019305
GLYMA_19G225400	GLYMA_19G225400	0.668279	0.892541	0.296672	0.875203	0.665467	0.62264	0.969447	0.881162	0.884239	0.635782	0.38024	0.612763	0.7862	0.34094	0.265336	0.67776	0.0931818	0.135809	0.0784314	0.0927152	0.0997552	0.08742	0.167794	0.156359	0.157151	0.0948617	0.0406504	0.0698443	0.0994975	0.0792683	0.0337079	0.108108
GLYMA_02G283000	GLYMA_02G283000	0.29706	0.0868678	0.184777	0.193192	0.156844	0.152239	0.263612	0.147429	0.197858	0.183298	0.0891815	0.275679	0.317355	0.233711	0.171057	0.107343	0.0416667	0.0132248	0.0261438	0.0198675	0.0220318	0.0234542	0.0568336	0.0319666	0.0418706	0.027668	0.0162602	0.035866	0.0482412	0.054878	0.0224719	0.023166
GLYMA_01G208600	GLYMA_01G208600	1.74848	1.80936	0.901416	1.23723	1.51143	1.62969	1.72464	1.39719	1.63077	1.75729	3.2931	1.56254	1.42661	1.75999	1.70812	1.6811	0.234848	0.2706	0.222222	0.15894	0.200734	0.234542	0.288227	0.23836	0.266449	0.241107	0.357724	0.162813	0.186935	0.27439	0.179775	0.239382
GLYMA_11G082200	GLYMA_11G082200	0.929617	1.0939	0.442293	0.911554	0.716493	0.606937	1.40266	1.07721	0.99769	1.02651	0.789962	1.15427	0.906593	0.383993	0.607517	0.416583	0.131061	0.170397	0.137255	0.109272	0.0979192	0.098081	0.235453	0.206393	0.181077	0.14888	0.138211	0.116564	0.128643	0.103659	0.101124	0.0694981
GLYMA_06G131700	GLYMA_06G131700	0.681398	0.651381	0.812625	0.70192	0.28356	0.565111	0.502148	0.584482	0.535325	0.425811	0.625762	0.33473	0.376765	0.276212	0.64005	0.222521	0.094697	0.119023	0.156863	0.0761589	0.0446756	0.08742	0.102842	0.123697	0.102229	0.0711462	0.0894309	0.0420009	0.0592965	0.0670732	0.0898876	0.034749
GLYMA_06G198400	GLYMA_06G198400	1.15587	1.353	0.639095	0.550291	0.970214	1.12459	1.81473	1.2244	1.85888	1.47059	1.37477	1.42178	1.24803	1.15429	0.509087	1.08443	0.177273	0.233978	0.183007	0.0827815	0.154223	0.176972	0.309878	0.246004	0.311582	0.230567	0.219512	0.170363	0.18995	0.219512	0.0674157	0.189189
GLYMA_01G092400	GLYMA_01G092400	0.624577	0.727231	0.401999	0.414121	0.988331	0.791838	0.648796	1.15242	0.979767	1.22505	0.707916	1.23447	1.15107	1.46778	1.04322	0.881357	0.103788	0.12767	0.143791	0.0562914	0.149327	0.147122	0.117727	0.222377	0.169114	0.184453	0.138211	0.142048	0.161809	0.237805	0.123596	0.142857
GLYMA_08G108300	GLYMA_08G108300	0.412953	0.36108	0.237712	0.227846	0.269806	0.304484	0.336017	0.336131	0.377702	0.442342	0.576643	0.366327	0.357002	0.157934	0.352325	0.264503	0.0628788	0.0666328	0.0457516	0.0364238	0.0434517	0.0533049	0.067659	0.0639333	0.0788472	0.0658762	0.0731707	0.0453044	0.0562814	0.0487805	0.0449438	0.034749
GLYMA_17G253000	GLYMA_17G253000	0.560821	0.649714	0.590165	0.692609	0.248447	0.189782	0.477237	0.485595	0.603681	0.629917	0.479719	0.403389	0.466156	0.510032	0.483372	0.460705	0.0962121	0.114446	0.130719	0.0761589	0.0391677	0.0426439	0.0906631	0.0993746	0.113105	0.0909091	0.0731707	0.0481359	0.0713568	0.103659	0.0561798	0.0849421
GLYMA_07G193700	GLYMA_07G193700	0.243512	0.2022	0.287581	0.218652	0.254126	0.344688	0.189764	0.174188	0.163706	0.180919	0.378246	0.227895	0.186543	0.103706	0.165643	0.11776	0.0401515	0.0366226	0.0784314	0.0231788	0.0391677	0.0511727	0.037889	0.0410007	0.0331702	0.027668	0.0325203	0.0278433	0.0271357	0.0304878	0.0224719	0.027027
GLYMA_03G056300	GLYMA_03G056300	0.2162	0.282897	0.168152	0.239285	0.26442	0.191733	0.179672	0.232732	0.309217	0.228211	0.260925	0.149148	0.12785	0.340899	0.466045	0.2827	0.0348485	0.0584944	0.0522876	0.0364238	0.0416157	0.0341151	0.052774	0.0674079	0.0647091	0.0408432	0.0487805	0.0193487	0.0231156	0.103659	0.0674157	0.034749
GLYMA_03G228100	GLYMA_03G228100	1.14307	1.0563	0.54911	0.574419	0.995074	1.07151	1.20795	0.977761	1.29593	0.903832	0.38982	1.04969	1.09953	1.42077	1.04612	0.954495	0.143939	0.167854	0.150327	0.0761589	0.129131	0.153518	0.20839	0.174427	0.211528	0.123847	0.0731707	0.112317	0.138693	0.207317	0.123596	0.138996
GLYMA_04G082000	GLYMA_04G082000	0.402903	0.349485	0.232244	0.272617	0.501586	0.290174	0.311214	0.384915	0.411625	0.349849	0.275199	0.374661	0.333038	0.269909	0.137632	0.142435	0.0621212	0.0676501	0.0457516	0.0331126	0.0771114	0.0533049	0.0595399	0.0833912	0.0880914	0.055336	0.0487805	0.0490798	0.0532663	0.0731707	0.0224719	0.034749
GLYMA_18G237300	GLYMA_18G237300	0.171696	0.151992	0.0823928	0.0597574	0.166306	0.063308	0.217768	0.125651	0.118122	0.183506	0.0767104	0.156584	0.108487	0.108458	0.122937	0.125507	0.0265152	0.0284842	0.0326797	0.013245	0.0287638	0.021322	0.0433018	0.0347464	0.0250136	0.0316206	0.0162602	0.0212364	0.0190955	0.0182927	0.0224719	0.027027
GLYMA_18G179500	GLYMA_18G179500	0.250458	0.28388	0.354398	0.189069	0.458676	0.297524	0.267164	0.300769	0.170924	0.500807	0.241615	0.549435	0.46405	0.622822	0.336875	0.286453	0.0409091	0.0513733	0.0849673	0.0264901	0.0734394	0.0618337	0.0392422	0.0639333	0.0304513	0.0869565	0.0487805	0.0679566	0.0633166	0.128049	0.0224719	0.042471
GLYMA_14G145000	GLYMA_14G145000	0.546689	0.412198	0.373628	0.361976	1.15168	1.31885	0.644368	0.535208	0.69808	0.869547	0.54603	1.12048	0.937433	0.668142	1.29853	0.569133	0.0886364	0.0757884	0.117647	0.0430464	0.160955	0.196162	0.129905	0.108409	0.120174	0.129117	0.0894309	0.124587	0.121608	0.158537	0.123596	0.11583
GLYMA_18G233700	GLYMA_18G233700	0.502806	0.450642	0.231382	0.347116	0.357408	0.474801	0.464304	0.621409	0.483242	0.471912	0.694871	0.556761	0.558951	0.411013	0.250154	0.190804	0.0795455	0.076297	0.0457516	0.0430464	0.0569155	0.0746269	0.0838972	0.127172	0.0826536	0.0632411	0.130081	0.0622935	0.0844221	0.0670732	0.0449438	0.0501931
GLYMA_08G002300	GLYMA_08G002300	0.782415	0.658639	0.990724	1.036	1.02074	1.12295	0.72237	0.73364	0.668526	0.694847	1.02811	1.00661	0.678359	1.79737	0.689919	0.493566	0.109848	0.113428	0.27451	0.102649	0.151163	0.17484	0.121786	0.148019	0.118543	0.114625	0.138211	0.114205	0.114573	0.280488	0.101124	0.0888031
GLYMA_03G097000	GLYMA_03G097000	0.149842	0.138139	0.102949	0.135558	0.260642	0.265044	0.186725	0.0841107	0.18963	0.0837057	0.184975	0.220046	0.247099	0.304792	0.0995213	0.0838975	0.0280303	0.0274669	0.0130719	0.0165563	0.0330477	0.0447761	0.0405954	0.0173732	0.0364328	0.0158103	0.0487805	0.0264276	0.0331658	0.0243902	0.011236	0.023166
GLYMA_07G202100	GLYMA_07G202100	0.817001	0.666874	0.582401	0.419998	0.933055	1.04884	0.776154	0.547432	0.558267	0.475171	0.623672	0.804585	0.491755	0.288065	0.949907	1.0003	0.124242	0.118515	0.124183	0.0596026	0.127907	0.153518	0.139378	0.118833	0.110386	0.0816864	0.0813008	0.0934403	0.0824121	0.0609756	0.11236	0.142857
GLYMA_15G219700	GLYMA_15G219700	1.2253	1.0789	1.5506	1.04247	2.60955	1.89399	1.25318	1.38259	1.41574	1.83494	1.33971	2.12788	1.60117	3.79461	1.54145	2.66389	0.173485	0.177518	0.326797	0.115894	0.294982	0.268657	0.228687	0.257123	0.238717	0.247694	0.162602	0.225106	0.215075	0.426829	0.168539	0.305019
GLYMA_17G073300	GLYMA_17G073300	0.828569	0.813882	0.602049	0.679078	0.845262	0.419737	0.488191	0.672378	0.497016	0.507004	0.647173	0.357033	0.606749	0.589555	0.232246	0.51013	0.132576	0.129705	0.156863	0.0860927	0.118727	0.0852878	0.097429	0.14385	0.100598	0.0803689	0.0650407	0.047664	0.0934673	0.115854	0.0337079	0.100386
GLYMA_10G295700	GLYMA_10G295700	0.405215	0.463071	0.426289	0.725803	0.276782	0.199435	0.489709	0.355417	0.42784	0.243387	0.392779	0.348783	0.398118	0.231859	0.515957	0.646238	0.0734848	0.0895219	0.137255	0.089404	0.0452876	0.0447761	0.0987821	0.0806115	0.0897227	0.0474308	0.0650407	0.0429448	0.0633166	0.054878	0.0786517	0.0965251
GLYMA_02G173300	GLYMA_02G173300	0.108095	0.136278	0.0528211	0.0549784	0.148583	0.133019	0.137923	0.145575	0.156236	0.123028	0.127905	0.165382	0.192154	0.17254	0.0704891	0.0910676	0.0181818	0.0284842	0.0261438	0.00993377	0.0257038	0.0234542	0.02977	0.0305768	0.0320827	0.0144928	0.0243902	0.0245399	0.0301508	0.0182927	0.011236	0.027027
GLYMA_19G116300	GLYMA_19G116300	0.315767	0.330939	0.122282	0.204423	0.239274	0.21542	0.444809	0.230137	0.369985	0.231913	0.124041	0.231892	0.209062	0.161109	0.164058	0.174281	0.0530303	0.0630722	0.0392157	0.0264901	0.0416157	0.0405117	0.0893099	0.0562891	0.079391	0.0395257	0.0162602	0.029731	0.0351759	0.054878	0.0224719	0.046332
GLYMA_20G059000	GLYMA_20G059000	0.17492	0.174671	0.15216	0.11613	0.162154	0.194552	0.184561	0.191328	0.186821	0.254738	0.181542	0.21301	0.172087	0.192289	0.422404	0.291938	0.0287879	0.0391658	0.0522876	0.0198675	0.0324357	0.0319829	0.0392422	0.047255	0.040783	0.0434783	0.0325203	0.0264276	0.0321608	0.0609756	0.0337079	0.0501931
GLYMA_13G329600	GLYMA_13G329600	3.15104	3.11725	1.73135	1.66873	2.94882	3.10825	4.29597	3.9288	4.42034	4.63876	2.56818	4.16355	3.90657	5.26835	1.44865	3.62286	0.350758	0.389624	0.346405	0.182119	0.30355	0.362473	0.500677	0.504517	0.516041	0.463768	0.292683	0.340727	0.417085	0.506098	0.191011	0.389961
GLYMA_10G284000	GLYMA_10G284000	0.355838	0.494931	0.390122	0.353232	0.636309	0.355707	0.473223	0.445819	0.595371	0.571742	0.234285	0.491495	0.53655	0.851946	0.664483	0.513795	0.0659091	0.0915565	0.143791	0.0529801	0.108935	0.0767591	0.0879567	0.107019	0.110386	0.0909091	0.0569106	0.0608778	0.0914573	0.170732	0.11236	0.0888031
GLYMA_03G152000	GLYMA_03G152000	0.460302	0.395126	0.539604	0.244322	0.461825	0.253889	0.639396	0.434466	0.437837	0.417287	0.287345	0.321829	0.365335	0.594724	0.175838	0.209473	0.0689394	0.0732452	0.156863	0.0364238	0.0728274	0.0490405	0.109608	0.095205	0.0902664	0.0645586	0.0243902	0.0377537	0.0582915	0.097561	0.0337079	0.03861
GLYMA_03G254800	GLYMA_03G254800	0.150943	0.0848051	0.185433	0.13176	0.188005	0.0725233	0.228869	0.0758958	0.0972484	0.090958	0.0794489	0.129876	0.127921	0.198749	0.109726	0.263596	0.0234848	0.0147508	0.0588235	0.0165563	0.0238678	0.021322	0.0500677	0.0180681	0.0184883	0.0144928	0.0162602	0.0165172	0.0190955	0.0182927	0.011236	0.042471
GLYMA_08G227900	GLYMA_08G227900	0.287053	0.233115	0.641783	0.206332	0.416701	0.341212	0.414714	0.331439	0.325473	0.31475	0.257985	0.358649	0.347841	0.329589	0.749862	0.320034	0.0492424	0.0498474	0.183007	0.0397351	0.0758874	0.0660981	0.0866035	0.0799166	0.0723219	0.0527009	0.0569106	0.0490798	0.0623116	0.0670732	0.11236	0.0733591
GLYMA_07G123900	GLYMA_07G123900	0.466283	0.475672	0.451245	0.519965	0.565042	0.399417	0.319934	0.590225	0.586948	0.706579	0.367654	0.615479	0.630902	0.466164	1.1624	0.370248	0.0780303	0.093591	0.150327	0.0596026	0.0875153	0.0746269	0.0717185	0.129256	0.120718	0.118577	0.0650407	0.0792827	0.102513	0.0914634	0.157303	0.0772201
GLYMA_14G061400	GLYMA_14G061400	0.691508	0.747321	0.2058	0.673431	0.428113	0.358379	0.689192	0.277402	0.426008	0.47518	0.233435	0.426359	0.452466	0.339763	0.484403	0.405553	0.108333	0.12411	0.0588235	0.0695364	0.0691554	0.0490405	0.125846	0.0639333	0.0772159	0.0764163	0.0325203	0.053799	0.0763819	0.0609756	0.0337079	0.0926641
GLYMA_10G089600	GLYMA_10G089600	0.624471	0.661297	0.278526	0.290208	0.849529	0.767087	0.949307	0.648206	0.900741	0.563412	0.697369	1.0114	0.947569	0.679451	0.388312	0.599601	0.0984848	0.111902	0.0718954	0.0298013	0.120563	0.136461	0.169147	0.127867	0.16422	0.0895916	0.0894309	0.113733	0.145729	0.140244	0.0561798	0.0965251
GLYMA_18G072500	GLYMA_18G072500	0.413265	0.159009	0.189844	0.29729	0.216679	0.207884	0.230077	0.157713	0.173859	0.289307	0.230063	0.207664	0.241677	0.113823	0.30612	0.136616	0.0515152	0.0274669	0.0588235	0.0298013	0.0373317	0.0447761	0.0473613	0.0326616	0.0348015	0.0500659	0.0406504	0.0302029	0.0422111	0.0182927	0.0337079	0.027027
GLYMA_19G234600	GLYMA_19G234600	0.134238	0.176324	0.370272	0.289443	0.221593	0.181539	0.176407	0.177618	0.102001	0.138762	0.189407	0.222686	0.130568	0.320832	0.225754	0.109105	0.0212121	0.0335707	0.124183	0.0562914	0.0385557	0.0341151	0.0311231	0.0437804	0.0212072	0.0197628	0.0243902	0.0250118	0.0231156	0.0609756	0.0449438	0.015444
GLYMA_08G192100	GLYMA_08G192100	0.195798	0.227007	0.120856	0.0933277	0.171852	0.142193	0.200793	0.226314	0.238268	0.136539	0.287316	0.150408	0.196014	0.338741	0.106376	0.193398	0.0310606	0.0488301	0.0392157	0.0198675	0.0293758	0.0277186	0.0419486	0.0451703	0.0483959	0.0223979	0.0325203	0.0212364	0.0281407	0.0487805	0.0337079	0.03861
GLYMA_04G113700	GLYMA_04G113700	0.254323	0.195214	0.187907	0.166577	0.294532	0.19267	0.196719	0.195262	0.138031	0.150155	0.141625	0.192036	0.242579	0.0946251	0.343384	0.191185	0.0363636	0.0335707	0.0392157	0.0264901	0.0428397	0.0341151	0.0392422	0.0410007	0.0266449	0.0250329	0.0162602	0.0231241	0.039196	0.0304878	0.0337079	0.030888
GLYMA_09G082000	GLYMA_09G082000	0.2978	0.27934	0.160619	0.240175	0.334795	0.261999	0.280207	0.272404	0.340759	0.276761	0.582078	0.446557	0.269277	0.307183	0.423317	0.446064	0.0462121	0.0595117	0.0588235	0.0298013	0.0569155	0.0533049	0.0581867	0.0660181	0.0777597	0.0527009	0.0894309	0.053799	0.0442211	0.0670732	0.0674157	0.0849421
GLYMA_11G087200	GLYMA_11G087200	0.342617	0.307303	0.158048	0.251487	0.273245	0.246523	0.197774	0.410356	0.285801	0.309089	0.216281	0.305529	0.235786	0.1972	0.326887	0.113257	0.0575758	0.060529	0.0653595	0.0331126	0.0446756	0.0511727	0.0446549	0.0896456	0.0570962	0.0513834	0.0325203	0.0405852	0.041206	0.054878	0.0337079	0.034749
GLYMA_19G096500	GLYMA_19G096500	0.157399	0.132251	0.106394	0.168084	0.171376	0.127178	0.214508	0.0907559	0.144081	0.224771	0.18861	0.153534	0.148566	0.0620361	0.141043	0.138567	0.0295455	0.0264496	0.0392157	0.0231788	0.0232558	0.0234542	0.0487145	0.028492	0.0326264	0.0329381	0.0325203	0.0155734	0.0221106	0.0182927	0.0224719	0.030888
GLYMA_09G285300	GLYMA_09G285300	0.635503	0.583757	0.450738	0.459307	0.976499	0.993168	0.645201	0.677166	0.626303	0.580811	0.964998	0.89086	0.601912	0.506384	0.778355	0.274117	0.0893939	0.0940997	0.130719	0.0562914	0.135863	0.153518	0.117727	0.129951	0.109842	0.0988142	0.105691	0.101935	0.0914573	0.0792683	0.0898876	0.0656371
GLYMA_08G053300	GLYMA_08G053300	0.188235	0.249606	0.198939	0.241709	0.524746	0.637811	0.241764	0.307588	0.221465	0.264514	0.509587	0.395783	0.298784	0.57702	0.681928	0.39069	0.0340909	0.0467955	0.0849673	0.0264901	0.0789474	0.100213	0.0433018	0.0708826	0.0500272	0.0421607	0.0569106	0.0519113	0.0502513	0.115854	0.0674157	0.0617761
GLYMA_16G050200	GLYMA_16G050200	0.532927	0.422343	0.284239	0.482552	0.645619	0.585512	0.643604	0.582134	0.461221	0.465307	0.754961	0.694458	0.565044	0.508232	0.208426	0.729701	0.0651515	0.0737538	0.0718954	0.0562914	0.102815	0.098081	0.117727	0.113273	0.0788472	0.0724638	0.105691	0.0854176	0.078392	0.121951	0.0449438	0.127413
GLYMA_20G187800	GLYMA_20G187800	0.825321	0.78904	0.559737	0.863363	0.615997	0.524992	0.406629	0.613953	0.514497	0.562318	0.299258	0.498911	0.494925	0.312919	1.08357	0.535087	0.127273	0.132248	0.150327	0.112583	0.101591	0.0810235	0.082544	0.124392	0.100598	0.0935441	0.0325203	0.0608778	0.0854271	0.0731707	0.11236	0.0772201
GLYMA_10G232300	GLYMA_10G232300	0.339589	0.342909	0.215079	0.641948	0.629854	0.443883	0.402083	0.42574	0.338813	0.721116	0.317479	0.606724	0.366443	0.26542	0.199165	0.422875	0.0522727	0.0640895	0.0588235	0.0397351	0.0899633	0.0810235	0.0798376	0.0826963	0.0717781	0.0777339	0.0487805	0.0651251	0.0562814	0.0792683	0.0224719	0.0733591
GLYMA_03G118400	GLYMA_03G118400	0.67756	0.633946	0.436446	0.325841	0.928273	1.17976	0.787985	0.642994	0.646232	0.651914	0.966441	0.826713	0.673593	0.764086	0.486835	0.915173	0.102273	0.106816	0.111111	0.0463576	0.126683	0.162047	0.140731	0.118138	0.115824	0.0974967	0.146341	0.0868334	0.0994975	0.121951	0.0898876	0.150579
GLYMA_18G052700	GLYMA_18G052700	0.217224	0.199324	0.209693	0.150279	0.299027	0.342094	0.287036	0.180224	0.272015	0.301679	0.108	0.223278	0.182164	0.164171	0.391005	0.153902	0.0363636	0.0366226	0.0522876	0.0231788	0.0416157	0.0788913	0.0554804	0.0319666	0.0522023	0.0527009	0.0325203	0.0287872	0.0291457	0.0609756	0.0449438	0.030888
GLYMA_13G306700	GLYMA_13G306700	0.184375	0.0978105	0.183583	0.163206	0.153774	0.0769403	0.145156	0.146116	0.121517	0.278421	0.256017	0.164965	0.133224	0.0938791	0.0879183	0.104118	0.0265152	0.0152594	0.0392157	0.0231788	0.0275398	0.0170576	0.0284168	0.0319666	0.0212072	0.0395257	0.0406504	0.0198207	0.0190955	0.0304878	0.011236	0.027027
GLYMA_05G035600	GLYMA_05G035600	0.366252	0.360934	0.184439	0.305871	0.322882	0.365586	0.368961	0.288536	0.323361	0.345107	0.474117	0.446384	0.394926	0.648106	0.179182	0.261782	0.0606061	0.0645982	0.0849673	0.0463576	0.0520196	0.0533049	0.0852503	0.0653231	0.0723219	0.0606061	0.0894309	0.053327	0.0713568	0.134146	0.0224719	0.0733591
GLYMA_18G008700	GLYMA_18G008700	0.777365	0.94506	0.425455	0.666934	0.630801	0.525696	0.6538	0.873748	1.53833	1.08336	1.13604	0.831825	0.975979	0.535508	0.492772	0.669335	0.109091	0.157681	0.111111	0.0927152	0.0887393	0.098081	0.129905	0.172342	0.25938	0.16996	0.178862	0.0962718	0.138693	0.115854	0.0898876	0.111969
GLYMA_08G074400	GLYMA_08G074400	0.271459	0.323326	0.729305	0.264561	0.306774	0.316605	0.269026	0.311557	0.296174	0.302778	0.201746	0.495761	0.319193	0.356316	0.397594	0.369116	0.0545455	0.0671414	0.163399	0.0463576	0.0477356	0.0597015	0.0663058	0.0729673	0.0674279	0.0619236	0.0487805	0.0618216	0.0512563	0.0731707	0.0674157	0.0656371
GLYMA_02G095200	GLYMA_02G095200	0.500078	0.415406	0.144151	0.245142	0.326129	0.266846	0.342309	0.418674	0.35689	0.382597	0.220666	0.355898	0.274872	0.163803	0.521009	0.29911	0.0651515	0.0818922	0.0653595	0.0331126	0.0452876	0.0405117	0.0581867	0.0903405	0.0701468	0.055336	0.0243902	0.0453044	0.0371859	0.0426829	0.0449438	0.0617761
GLYMA_05G234700	GLYMA_05G234700	0.65591	0.783358	0.947516	0.950967	0.702454	0.464182	1.13224	0.704331	0.866049	0.56853	0.31653	0.846026	0.553825	0.632046	1.14355	0.786447	0.108333	0.136826	0.222222	0.119205	0.102815	0.0767591	0.198917	0.147325	0.150625	0.0961792	0.0650407	0.0910807	0.0894472	0.146341	0.146067	0.123552
GLYMA_03G106500	GLYMA_03G106500	0.79858	0.853122	0.801841	0.616758	1.09838	1.04756	0.767561	0.833166	0.782806	1.19743	1.3277	1.04167	0.919207	1.84538	0.594742	0.510953	0.117424	0.133774	0.150327	0.0728477	0.142595	0.17484	0.146143	0.152189	0.138119	0.16996	0.170732	0.110901	0.111558	0.280488	0.0786517	0.104247
GLYMA_08G289600	GLYMA_08G289600	0.0473715	0.071905	0.128459	0.0588622	0.081715	0.0716794	0.0418777	0.0569711	0.0365234	0.0856691	0.0762549	0.0761592	0.0524963	0.0414028	0.0355793	0.119177	0.0106061	0.0167854	0.0130719	0.013245	0.0159119	0.0170576	0.0108254	0.0145935	0.0114192	0.0158103	0.0162602	0.00943841	0.0120603	0.0182927	0.011236	0.019305
GLYMA_13G211500	GLYMA_13G211500	0.129815	0.245893	0.14327	0.256837	0.105631	0.0906668	0.235546	0.172524	0.213599	0.327152	0.106316	0.212709	0.136708	0.16072	0.222154	0.192186	0.0227273	0.0483215	0.0261438	0.0397351	0.0177479	0.021322	0.0500677	0.0451703	0.0467645	0.0527009	0.0162602	0.0250118	0.0211055	0.0243902	0.0337079	0.0501931
GLYMA_10G283900	GLYMA_10G283900	0.492907	0.636442	0.2137	0.405871	0.29274	0.380614	0.771084	0.424475	0.501537	0.379315	0.51101	0.498472	0.569347	0.305336	0.228548	0.617398	0.0719697	0.103764	0.0718954	0.0430464	0.0416157	0.0639659	0.138024	0.0875608	0.096248	0.057971	0.0650407	0.0571024	0.0834171	0.0609756	0.0337079	0.0772201
GLYMA_05G242800	GLYMA_05G242800	0.35585	0.40217	0.154867	0.278341	0.440082	0.470168	0.500664	0.390108	0.466711	0.542406	0.426361	0.558679	0.459805	0.50057	0.345994	0.463941	0.055303	0.0737538	0.0522876	0.0298013	0.0697674	0.0831557	0.0879567	0.0903405	0.0870038	0.0790514	0.0813008	0.0641812	0.0723618	0.0914634	0.0337079	0.0617761
GLYMA_10G188600	GLYMA_10G188600	1.08851	1.31974	0.739431	1.68345	1.11397	1.19218	1.67085	1.06936	1.25459	1.3343	1.63675	1.17359	1.27591	0.84637	0.786712	2.66685	0.156818	0.21414	0.202614	0.201987	0.152387	0.168443	0.266576	0.207783	0.219685	0.196311	0.211382	0.136857	0.190955	0.152439	0.123596	0.339768
GLYMA_06G095600	GLYMA_06G095600	0.798827	0.775992	0.843422	0.732014	0.735842	0.571448	0.95497	0.720648	0.760112	0.604681	0.437082	0.671326	0.663966	0.264813	0.460529	0.517299	0.12197	0.137843	0.235294	0.10596	0.113831	0.098081	0.17862	0.143155	0.137575	0.105402	0.0813008	0.0854176	0.0924623	0.0731707	0.0786517	0.0888031
GLYMA_12G183000	GLYMA_12G183000	0.250075	0.354997	0.199542	0.253316	0.325705	0.478382	0.719478	0.338086	0.554485	0.46247	0.295012	0.431467	0.291999	0.341457	0.289168	0.212245	0.0386364	0.0640895	0.0392157	0.0331126	0.0538556	0.0724947	0.112314	0.0743572	0.0989668	0.083004	0.0325203	0.0519113	0.0512563	0.0670732	0.0337079	0.046332
GLYMA_18G117500	GLYMA_18G117500	0.418477	0.507228	0.147108	0.253364	0.499229	0.511485	0.530238	0.436561	0.489959	0.507424	0.472817	0.50103	0.391387	0.522504	0.162706	0.376901	0.0689394	0.0879959	0.0522876	0.0331126	0.0740514	0.098081	0.110961	0.0826963	0.0946166	0.085639	0.0569106	0.0604059	0.0683417	0.103659	0.0224719	0.0810811
GLYMA_06G206000	GLYMA_06G206000	0.209058	0.174201	0.145467	0.22678	0.372962	0.244046	0.188056	0.186798	0.110874	0.321505	0.399469	0.291696	0.273532	0.193673	0.217833	0.112729	0.030303	0.0300102	0.0522876	0.0231788	0.0538556	0.0405117	0.0311231	0.0444753	0.0228385	0.055336	0.0731707	0.0339783	0.0452261	0.0487805	0.0449438	0.019305
GLYMA_17G218700	GLYMA_17G218700	1.19052	1.06306	0.850551	0.482738	1.59254	0.966783	0.990573	1.25185	1.24517	0.818043	0.584562	1.22015	1.1554	0.979849	0.442325	1.16459	0.162879	0.178535	0.189542	0.0695364	0.205018	0.140725	0.175913	0.225156	0.209897	0.129117	0.113821	0.136857	0.166834	0.152439	0.0786517	0.181467
GLYMA_02G103900	GLYMA_02G103900	1.84021	1.49315	0.905291	1.19737	2.63175	2.64648	1.84174	1.58804	1.61858	1.5707	2.43197	2.42482	1.92386	1.79696	3.2584	1.88524	0.230303	0.234486	0.169935	0.145695	0.292534	0.347548	0.288227	0.263377	0.270256	0.206851	0.276423	0.249646	0.239196	0.27439	0.292135	0.250965
GLYMA_05G146600	GLYMA_05G146600	0.166243	0.125408	0.068683	0.1957	0.0981548	0.142312	0.120403	0.0752247	0.059188	0.10019	0.212971	0.0796532	0.11242	0.117355	0.1976	0.0803424	0.025	0.0208545	0.0196078	0.0331126	0.0159119	0.0277186	0.0270636	0.019458	0.011963	0.0171278	0.0243902	0.0127419	0.0170854	0.0182927	0.0224719	0.027027
GLYMA_12G059700	GLYMA_12G059700	2.92654	2.62319	1.02673	1.5705	2.6737	2.48309	2.62187	2.71302	3.69403	3.08232	2.5698	2.97036	3.05073	1.88447	2.17197	2.89592	0.343182	0.358596	0.254902	0.162252	0.317013	0.328358	0.362652	0.403058	0.475802	0.387352	0.308943	0.283624	0.346734	0.29878	0.269663	0.34749
GLYMA_19G026300	GLYMA_19G026300	0.0897949	0.0789392	0.159556	0.129735	0.13851	0.0621433	0.106161	0.172894	0.122287	0.223527	0.16697	0.146683	0.123404	0.126186	0.0697363	0.0846249	0.0166667	0.0193286	0.0196078	0.0231788	0.0269278	0.0191898	0.0230041	0.0451703	0.0271887	0.0355731	0.0162602	0.0221803	0.0180905	0.0304878	0.0224719	0.011583
GLYMA_06G092800	GLYMA_06G092800	0.116356	0.160317	0.123187	0.185781	0.214566	0.130444	0.187395	0.154208	0.191313	0.119234	0.418382	0.238394	0.177279	0.120877	0.320204	0.394492	0.0181818	0.0300102	0.0392157	0.0231788	0.0318237	0.0191898	0.0446549	0.0312717	0.0380642	0.027668	0.0406504	0.0292591	0.0271357	0.0365854	0.0449438	0.0540541
GLYMA_10G271100	GLYMA_10G271100	1.08854	1.17632	0.950135	1.12208	1.02514	1.00472	1.13312	0.792502	0.784185	0.769456	0.327159	0.644294	0.689843	0.446237	0.591067	0.596907	0.154545	0.186673	0.254902	0.139073	0.141983	0.162047	0.182679	0.149409	0.145731	0.115942	0.0650407	0.0717319	0.0954774	0.134146	0.101124	0.104247
GLYMA_10G265900	GLYMA_10G265900	0.425829	0.581341	0.222963	0.167455	0.573428	0.576777	0.574564	0.509094	0.563919	0.602072	0.546141	0.522497	0.589811	0.238974	0.236469	0.536598	0.0734848	0.106816	0.0849673	0.0298013	0.0905753	0.10661	0.120433	0.104934	0.108755	0.0961792	0.0813008	0.0646531	0.081407	0.0731707	0.0449438	0.0694981
GLYMA_11G154400	GLYMA_11G154400	0.457885	0.544286	0.182451	0.334834	0.446729	0.280089	0.476912	0.655888	0.614238	0.65303	0.358926	0.463777	0.360642	0.281959	0.562296	0.378524	0.0727273	0.101221	0.0653595	0.0529801	0.0728274	0.0597015	0.100135	0.121612	0.114192	0.109354	0.0487805	0.0561586	0.0603015	0.0670732	0.0674157	0.0694981
GLYMA_18G130400	GLYMA_18G130400	0.856882	0.871954	0.343412	0.676052	0.898863	1.08901	1.23397	0.77758	1.09902	0.765486	1.14002	1.02198	0.856242	0.702126	1.12898	1.0723	0.118182	0.136317	0.124183	0.089404	0.124235	0.164179	0.220568	0.148714	0.184883	0.121212	0.170732	0.111845	0.126633	0.121951	0.0786517	0.181467
GLYMA_04G044200	GLYMA_04G044200	0.443234	0.404575	0.259012	0.189589	0.293253	0.244662	0.393788	0.395844	0.456079	0.351317	0.261386	0.426922	0.374488	0.681231	0.411006	0.279215	0.0613636	0.0752798	0.0784314	0.0331126	0.0489596	0.0447761	0.0784844	0.0826963	0.096248	0.057971	0.0569106	0.0500236	0.0532663	0.054878	0.0561798	0.0501931
GLYMA_03G000700	GLYMA_03G000700	0.573451	0.370513	0.337206	0.368897	0.437665	0.294704	0.431704	0.341225	0.339546	0.203241	0.376857	0.370609	0.302155	0.159644	0.394143	0.273821	0.0878788	0.0712106	0.111111	0.0562914	0.0746634	0.0575693	0.0960758	0.0778318	0.0766721	0.0395257	0.0650407	0.0471921	0.0452261	0.054878	0.0561798	0.03861
GLYMA_19G003900	GLYMA_19G003900	0.353544	0.197903	0.130639	0.260672	0.370028	0.452165	0.340364	0.261829	0.343788	0.264891	0.193727	0.346554	0.339522	0.158334	0.469156	0.313704	0.0537879	0.0417091	0.0457516	0.0364238	0.0544676	0.0852878	0.0663058	0.056984	0.0636215	0.0434783	0.0325203	0.041529	0.0522613	0.0487805	0.0337079	0.046332
GLYMA_17G215300	GLYMA_17G215300	0.563957	1.05056	0.696732	0.696391	0.62144	0.343636	0.817828	0.721038	0.668079	0.446991	0.292539	0.588161	0.47307	1.01722	0.808158	0.587809	0.094697	0.181078	0.235294	0.10596	0.0905753	0.0767591	0.140731	0.148714	0.129418	0.0869565	0.0569106	0.0731477	0.0753769	0.158537	0.101124	0.0965251
GLYMA_14G119800	GLYMA_14G119800	1.48895	2.15232	0.971596	1.6577	1.41699	1.53595	1.58776	2.04269	3.48632	2.56062	1.77055	1.86465	2.67361	1.44982	1.91195	1.3861	0.210606	0.31587	0.202614	0.195364	0.188494	0.221748	0.251691	0.327311	0.471996	0.328063	0.243902	0.196791	0.316583	0.262195	0.224719	0.227799
GLYMA_18G067400	GLYMA_18G067400	0.366026	0.369824	0.160275	0.143682	0.478679	0.387634	0.468277	0.418047	0.357747	0.28757	0.373682	0.515389	0.430758	0.378555	0.309272	0.224178	0.0530303	0.0645982	0.0326797	0.0165563	0.0673195	0.0682303	0.0879567	0.0785268	0.0690593	0.0513834	0.0569106	0.059462	0.0673367	0.0792683	0.0337079	0.0501931
GLYMA_07G218700	GLYMA_07G218700	0.564234	0.672945	1.50938	1.20091	0.792365	0.555648	0.693994	0.584928	0.559535	0.803052	0.550739	0.658206	0.420807	0.785426	0.425759	0.619044	0.0924242	0.125636	0.320261	0.135762	0.128519	0.0916844	0.121786	0.125087	0.111474	0.125165	0.0813008	0.0811704	0.081407	0.128049	0.0786517	0.108108
GLYMA_11G241800	GLYMA_11G241800	0.633521	0.521018	0.564924	0.832467	0.689444	0.305436	0.561674	0.432858	0.541369	0.528192	0.592191	0.596259	0.516112	0.232443	0.410139	0.750375	0.0893939	0.0956256	0.163399	0.122517	0.0973072	0.0447761	0.106901	0.0945101	0.100598	0.0790514	0.0650407	0.0689004	0.0834171	0.0487805	0.0674157	0.111969
GLYMA_08G186800	GLYMA_08G186800	0.426533	0.35784	0.171062	0.446732	0.475576	0.586136	0.483166	0.325592	0.387965	0.612626	0.246327	0.476052	0.350445	0.297169	0.468545	0.38909	0.0643939	0.0610376	0.0653595	0.0463576	0.0654835	0.10661	0.0866035	0.075747	0.0783034	0.0869565	0.0325203	0.0580462	0.0532663	0.0731707	0.0561798	0.0772201
GLYMA_12G039300	GLYMA_12G039300	0.669657	0.653678	0.800282	0.713784	0.677461	0.498089	0.814477	0.599108	0.673857	0.56235	0.227426	0.565161	0.525862	0.316529	0.383197	0.793267	0.109848	0.112411	0.183007	0.0993377	0.117503	0.0831557	0.14885	0.125087	0.132681	0.0948617	0.0406504	0.0707881	0.0834171	0.0914634	0.0449438	0.111969
GLYMA_09G152000	GLYMA_09G152000	0.412367	0.476376	0.210301	0.496151	0.46618	0.589586	0.397163	0.461627	0.470917	0.495257	0.52725	0.533914	0.522023	0.278575	0.164632	0.446234	0.0666667	0.084944	0.0588235	0.0629139	0.0807834	0.115139	0.0649526	0.0945101	0.0957042	0.0671937	0.097561	0.0604059	0.081407	0.0853659	0.0224719	0.0733591
GLYMA_05G137400	GLYMA_05G137400	0.174223	0.194084	0.25314	0.151076	0.321656	0.449014	0.25033	0.261055	0.125413	0.237045	0.422897	0.389959	0.30417	0.192949	0.258242	0.233114	0.025	0.0350966	0.0588235	0.0198675	0.0538556	0.0767591	0.0446549	0.0576789	0.0271887	0.0368906	0.0650407	0.0438886	0.0532663	0.0609756	0.0337079	0.046332
GLYMA_12G063700	GLYMA_12G063700	0.670061	0.465517	0.788817	0.859102	0.31193	0.240008	0.35298	0.37724	0.351594	0.397918	0.377418	0.267798	0.346419	0.247032	0.493018	0.363696	0.102273	0.0905392	0.20915	0.119205	0.0587515	0.0511727	0.0811908	0.086171	0.0755846	0.0592885	0.0650407	0.0330345	0.0532663	0.0426829	0.0561798	0.0540541
GLYMA_20G054300	GLYMA_20G054300	0.354885	0.272652	0.405179	0.218721	0.479671	0.312079	0.218659	0.429083	0.188195	0.401454	0.67361	0.385064	0.350976	0.216785	0.406255	0.22691	0.0583333	0.0483215	0.117647	0.0331126	0.0697674	0.0639659	0.0460081	0.0826963	0.0386079	0.0566535	0.0569106	0.0448325	0.0462312	0.0731707	0.0337079	0.046332
GLYMA_03G016500	GLYMA_03G016500	0.954636	0.623595	0.334829	0.562088	0.591412	0.532642	0.572497	0.446667	0.588045	0.461346	0.474701	0.568735	0.491899	0.455624	0.355161	0.266817	0.142424	0.104273	0.0980392	0.0728477	0.0869033	0.0959488	0.110961	0.0833912	0.109299	0.0645586	0.0650407	0.07126	0.0643216	0.0853659	0.0561798	0.046332
GLYMA_02G034800	GLYMA_02G034800	0.102912	0.0984102	0.176812	0.115342	0.118735	0.105459	0.136887	0.0981383	0.0868026	0.0751384	0.049423	0.0977181	0.0944528	0.100543	0.116435	0.105683	0.0212121	0.0223805	0.0326797	0.0198675	0.0330477	0.0255864	0.0338295	0.0305768	0.0146819	0.00790514	0.00813008	0.0151015	0.0150754	0.0365854	0.011236	0.023166
GLYMA_16G116400	GLYMA_16G116400	0.700109	1.06754	0.653211	0.649508	0.79794	0.642725	1.07392	1.05272	1.40768	0.978087	0.727464	1.01881	0.99993	0.671568	0.393508	0.846265	0.108333	0.169888	0.176471	0.0860927	0.122399	0.110874	0.201624	0.185546	0.246873	0.15415	0.105691	0.118924	0.148744	0.140244	0.0561798	0.162162
GLYMA_10G193000	GLYMA_10G193000	0.488136	0.392332	0.539809	0.510102	0.361091	0.42802	0.597581	0.397999	0.398769	0.34679	0.412358	0.51009	0.459478	0.349239	0.241875	0.167064	0.0818182	0.0808749	0.137255	0.0695364	0.0611995	0.0767591	0.110961	0.0910354	0.0804785	0.0632411	0.0487805	0.0580462	0.0663317	0.0487805	0.0337079	0.027027
GLYMA_02G188600	GLYMA_02G188600	0.318612	0.303095	0.209583	0.150297	0.447996	0.521876	0.145918	0.287473	0.317954	0.394985	0.149353	0.372953	0.414719	0.270498	0.428007	0.277775	0.0393939	0.0498474	0.0588235	0.0231788	0.0709914	0.0852878	0.0311231	0.0597637	0.0538336	0.0592885	0.0243902	0.0453044	0.0542714	0.0731707	0.0561798	0.0540541
GLYMA_05G049200	GLYMA_05G049200	0.468397	0.310718	0.343085	0.42354	0.289015	0.280353	0.389728	0.233832	0.245124	0.233632	0.338841	0.318441	0.319692	0.131002	0.270535	0.225896	0.0651515	0.0534079	0.0522876	0.0562914	0.0391677	0.0490405	0.0852503	0.0542043	0.0527461	0.0421607	0.0569106	0.0386975	0.0542714	0.0609756	0.0337079	0.0501931
GLYMA_04G095800	GLYMA_04G095800	0.267634	0.386075	0.466519	0.228649	0.405911	0.478496	0.458105	0.393209	0.33717	0.290551	0.162496	0.351645	0.357943	0.318049	0.580766	0.284342	0.0462121	0.0727365	0.0849673	0.0364238	0.0746634	0.0831557	0.0893099	0.0868659	0.0674279	0.0513834	0.0325203	0.0457763	0.0582915	0.0609756	0.0561798	0.046332
GLYMA_16G135000	GLYMA_16G135000	0.359302	0.309183	0.458745	0.196291	0.200788	0.161768	0.229662	0.251763	0.234155	0.185082	0.264358	0.178497	0.156233	0.128379	0.335673	0.143409	0.0590909	0.0554425	0.117647	0.0264901	0.0281518	0.0383795	0.0568336	0.0507297	0.0494834	0.0289855	0.0569106	0.0231241	0.0271357	0.0304878	0.0337079	0.046332
GLYMA_12G156800	GLYMA_12G156800	0.357187	0.193298	0.461846	0.167102	0.402031	0.241049	0.226744	0.209459	0.238187	0.264996	0.181831	0.241442	0.184936	0.582789	0.163122	0.212054	0.0507576	0.0340793	0.156863	0.0298013	0.0697674	0.0447761	0.0405954	0.0458652	0.0440457	0.0461133	0.0325203	0.0306748	0.0271357	0.097561	0.0337079	0.03861
GLYMA_02G288000	GLYMA_02G288000	0.687526	0.628762	0.254531	0.192462	0.307517	0.488318	0.458741	0.461513	0.530609	0.573311	0.428229	0.609715	0.540883	0.380875	0.317711	0.373825	0.0931818	0.0905392	0.0457516	0.0198675	0.0458996	0.0746269	0.0811908	0.0820014	0.104405	0.0750988	0.0569106	0.0717319	0.0733668	0.103659	0.0449438	0.0694981
GLYMA_17G204000	GLYMA_17G204000	0.96154	1.32654	0.509794	0.63856	1.0265	1.13291	1.41776	1.23604	1.60384	1.33352	1.54995	1.27366	1.17166	0.938081	0.449089	1.34228	0.157576	0.215666	0.156863	0.0860927	0.149939	0.183369	0.265223	0.224461	0.275693	0.213439	0.235772	0.147711	0.176884	0.219512	0.0561798	0.204633
GLYMA_10G229500	GLYMA_10G229500	0.407835	0.305018	0.34695	0.414048	0.148366	0.239112	0.246448	0.232537	0.201671	0.261011	0.146781	0.13824	0.16834	0.115957	0.160049	0.276132	0.0590909	0.0559512	0.117647	0.0430464	0.0214198	0.0405117	0.0419486	0.047255	0.0440457	0.0487484	0.0162602	0.0193487	0.0281407	0.0304878	0.0224719	0.042471
GLYMA_15G131900	GLYMA_15G131900	0.357551	0.243428	0.615769	0.221241	0.447517	0.398304	0.432025	0.343838	0.300899	0.271021	0.172491	0.469738	0.373221	0.252503	0.198028	0.19084	0.05	0.0442523	0.150327	0.0264901	0.0673195	0.0618337	0.0784844	0.0660181	0.0560087	0.0382082	0.0243902	0.0552147	0.0532663	0.054878	0.0449438	0.030888
GLYMA_11G063700	GLYMA_11G063700	1.18616	0.897376	0.642828	1.0981	0.892706	0.548485	1.6235	1.05143	1.63761	1.26252	0.842422	1.64089	1.28449	1.95739	1.18214	0.975294	0.163636	0.15056	0.124183	0.139073	0.137087	0.098081	0.254398	0.202224	0.264818	0.173913	0.113821	0.168948	0.175879	0.286585	0.101124	0.158301
GLYMA_17G160300	GLYMA_17G160300	0.317698	0.246643	0.0988693	0.187242	0.194326	0.142094	0.299838	0.228713	0.35283	0.207448	0.273849	0.349095	0.245988	0.263449	0.173098	0.228438	0.0469697	0.0422177	0.0326797	0.0198675	0.0324357	0.0298507	0.0622463	0.0500347	0.0674279	0.0342556	0.0243902	0.0420009	0.0371859	0.0487805	0.0224719	0.042471
GLYMA_05G127300	GLYMA_05G127300	0.589863	0.840145	0.358846	0.491798	0.636602	0.94934	0.729063	0.575312	0.576477	0.701417	1.02335	0.956355	0.867389	1.0488	1.2805	0.622583	0.0840909	0.128179	0.0915033	0.0662252	0.0930233	0.162047	0.125846	0.114663	0.11093	0.0974967	0.138211	0.102407	0.123618	0.146341	0.134831	0.108108
GLYMA_09G273900	GLYMA_09G273900	0.201027	0.170852	0.229105	0.150365	0.313796	0.431458	0.172769	0.243231	0.139555	0.212505	0.477502	0.401458	0.220304	0.497954	0.381417	0.265652	0.0333333	0.0310275	0.0522876	0.0264901	0.0520196	0.0746269	0.0284168	0.0514246	0.0277325	0.0342556	0.0650407	0.0490798	0.040201	0.0914634	0.0449438	0.0617761
GLYMA_06G105000	GLYMA_06G105000	2.5467	3.21145	2.28857	2.77308	1.32039	1.06811	1.98598	1.4872	3.52338	1.87033	2.13037	3.12758	2.14325	2.15216	0.987516	2.81845	0.265152	0.357579	0.326797	0.258278	0.140759	0.136461	0.270636	0.220292	0.412724	0.218709	0.268293	0.260028	0.225126	0.341463	0.0898876	0.316602
GLYMA_11G107200	GLYMA_11G107200	0.345458	0.532886	0.524082	0.362284	0.422005	0.149358	0.481057	0.517695	0.502418	0.316092	0.510076	0.377786	0.385038	0.327687	0.363259	0.240893	0.0484848	0.100203	0.143791	0.0463576	0.0630355	0.0341151	0.0744249	0.102849	0.0924415	0.0513834	0.0650407	0.0486078	0.0552764	0.0731707	0.0337079	0.046332
GLYMA_17G128200	GLYMA_17G128200	6.36862	8.3137	4.1863	6.91799	2.72409	2.41643	6.71444	5.86597	7.552	5.68196	3.57596	4.01359	5.72916	2.36192	2.33056	3.75923	0.510606	0.66175	0.562092	0.503311	0.285802	0.270789	0.630582	0.580959	0.649266	0.509881	0.349593	0.333176	0.496482	0.27439	0.224719	0.374517
GLYMA_01G031400	GLYMA_01G031400	8.72483	9.63187	6.38606	4.80461	10.1253	8.98235	10.8729	10.8724	13.2731	14.8769	13.4864	12.9018	14.3761	17.1363	11.0939	8.56696	0.614394	0.71414	0.673203	0.410596	0.642595	0.663113	0.723951	0.786657	0.828167	0.827404	0.731707	0.68806	0.784925	0.884146	0.595506	0.610039
GLYMA_20G106500	GLYMA_20G106500	0.299409	0.334079	0.211505	0.158927	0.273683	0.317588	0.256132	0.284896	0.358206	0.346005	0.101823	0.293729	0.27318	0.258865	0.363152	0.161927	0.0492424	0.0595117	0.0653595	0.0231788	0.0489596	0.0490405	0.0487145	0.0660181	0.0777597	0.0632411	0.0243902	0.0368098	0.0442211	0.0670732	0.0561798	0.030888
GLYMA_10G069000	GLYMA_10G069000	0.262354	0.257441	0.392495	0.213802	0.267293	0.263422	0.316615	0.230143	0.172327	0.21012	0.147185	0.309644	0.257533	0.20396	0.127681	0.455306	0.0393939	0.0513733	0.0849673	0.0298013	0.0465116	0.0447761	0.0622463	0.04795	0.0396955	0.0368906	0.0243902	0.0382256	0.0422111	0.054878	0.011236	0.0656371
GLYMA_05G151500	GLYMA_05G151500	0.300039	0.30252	0.261229	0.499411	0.250806	0.360877	0.377132	0.361927	0.317014	0.291383	0.23605	0.310924	0.377799	0.190147	0.140074	0.358701	0.0537879	0.0579858	0.0718954	0.0596026	0.0452876	0.0660981	0.0635995	0.0681028	0.0619902	0.0421607	0.0487805	0.0377537	0.0633166	0.0365854	0.0224719	0.0888031
GLYMA_02G109400	GLYMA_02G109400	0.401126	0.487981	0.586609	0.491882	0.570755	0.365853	0.358879	0.516583	0.503338	0.536567	0.458243	0.489046	0.376016	1.09636	0.620266	1.27946	0.0643939	0.0824008	0.150327	0.0662252	0.0832313	0.0810235	0.0798376	0.102849	0.0929853	0.0816864	0.0650407	0.0575743	0.0653266	0.189024	0.0786517	0.196911
GLYMA_06G162500	GLYMA_06G162500	1.5846	0.821124	1.91347	1.34468	2.56086	2.21961	1.09336	1.08376	0.727889	1.33556	1.72795	2.12935	1.52469	2.59336	2.40341	0.92739	0.210606	0.123601	0.359477	0.142384	0.301102	0.311301	0.17456	0.172342	0.115824	0.184453	0.227642	0.212836	0.20201	0.396341	0.202247	0.15444
GLYMA_08G258500	GLYMA_08G258500	0.534425	0.448593	0.431646	0.313588	1.11709	0.92246	0.599529	0.565155	0.594819	0.645827	1.0322	0.887989	0.653988	0.428407	0.621715	0.61752	0.0772727	0.0752798	0.0915033	0.0331126	0.135251	0.144989	0.120433	0.104934	0.111474	0.105402	0.130081	0.0981595	0.0924623	0.115854	0.0898876	0.0888031
GLYMA_13G136500	GLYMA_13G136500	0.501372	0.527958	0.236483	0.345132	0.748039	0.78492	0.41031	0.512512	0.595456	0.841847	0.659269	0.770467	0.638388	0.544715	0.330836	0.750821	0.0787879	0.0895219	0.0522876	0.0463576	0.0954712	0.1258	0.0838972	0.100069	0.112561	0.113307	0.0731707	0.0943841	0.0904523	0.097561	0.0449438	0.0965251
GLYMA_19G263500	GLYMA_19G263500	0.812443	1.09848	0.55676	0.834699	0.800557	0.636089	0.788748	1.16918	0.957268	0.81894	0.367358	0.876321	0.675907	0.447911	0.32847	0.354208	0.119697	0.177009	0.143791	0.089404	0.106487	0.102345	0.143437	0.220987	0.170201	0.130435	0.0650407	0.0929684	0.101508	0.0914634	0.0449438	0.0733591
GLYMA_07G066700	GLYMA_07G066700	0.853099	1.24667	0.543689	1.26226	0.713475	0.702255	1.17825	1.1189	1.6605	1.09764	1.03313	0.811254	0.77189	1.1484	0.466799	0.895869	0.12197	0.196846	0.176471	0.122517	0.100979	0.10661	0.201624	0.202919	0.278412	0.180501	0.178862	0.0924965	0.118593	0.121951	0.0674157	0.142857
GLYMA_09G020800	GLYMA_09G020800	0.67104	0.89507	0.327243	0.961752	0.390152	0.315109	0.308652	0.671183	0.433575	0.585466	0.417943	0.366439	0.508588	0.523484	0.273057	0.27037	0.106061	0.137843	0.0784314	0.112583	0.0587515	0.0597015	0.0514208	0.116053	0.0777597	0.085639	0.0731707	0.0386975	0.0703518	0.0731707	0.0449438	0.046332
GLYMA_07G272800	GLYMA_07G272800	0.256835	0.307211	0.339002	0.176181	0.322238	0.305779	0.237666	0.403033	0.338306	0.272166	0.288148	0.26487	0.378603	0.400565	0.626652	0.61574	0.0416667	0.0620549	0.117647	0.0198675	0.0550796	0.0554371	0.0500677	0.0896456	0.0728657	0.0540184	0.0569106	0.0386975	0.0532663	0.0609756	0.0898876	0.0849421
GLYMA_04G037600	GLYMA_04G037600	0.0834918	0.0833766	0.0483156	0.084006	0.121339	0.124979	0.0676755	0.0766399	0.0797081	0.117658	0.103174	0.136507	0.143267	0.152056	0.171804	0.107421	0.0136364	0.0157681	0.0196078	0.013245	0.0232558	0.0277186	0.0121786	0.0180681	0.0190321	0.0250329	0.00813008	0.0155734	0.0180905	0.0365854	0.011236	0.011583
GLYMA_02G138800	GLYMA_02G138800	0.305902	0.406927	0.871687	0.264241	0.325411	0.272259	0.289848	0.389105	0.323262	0.356615	0.407028	0.383773	0.292373	0.379409	0.616811	0.245155	0.0522727	0.0737538	0.202614	0.0397351	0.0489596	0.0447761	0.0608931	0.0771369	0.0630778	0.0540184	0.0569106	0.0448325	0.0502513	0.0853659	0.0786517	0.046332
GLYMA_11G050300	GLYMA_11G050300	0.219306	0.269563	0.21546	0.297867	0.6258	0.51003	0.283467	0.351684	0.290455	0.573594	0.536397	0.562008	0.447721	0.659273	0.18542	0.482171	0.0363636	0.0498474	0.0718954	0.0331126	0.0893513	0.102345	0.0514208	0.0826963	0.0554649	0.0895916	0.0650407	0.0660689	0.0733668	0.140244	0.0337079	0.0656371
GLYMA_10G260400	GLYMA_10G260400	0.482093	0.443227	0.455608	0.521431	0.8391	0.704554	0.518516	0.293984	0.433151	0.465465	0.544076	0.631197	0.358486	0.410143	0.379973	0.236005	0.0742424	0.0752798	0.0980392	0.0629139	0.113219	0.119403	0.104195	0.0611536	0.0831974	0.0711462	0.097561	0.0792827	0.0572864	0.0792683	0.0561798	0.042471
GLYMA_08G296400	GLYMA_08G296400	0.103798	0.136753	0.369017	0.136141	0.210771	0.218988	0.161936	0.19579	0.212048	0.203597	0.173746	0.196297	0.23391	0.15982	0.199928	0.194191	0.0181818	0.0289929	0.0915033	0.0165563	0.0299878	0.0447761	0.0324763	0.0361362	0.0391517	0.0329381	0.0325203	0.023596	0.0361809	0.0426829	0.011236	0.034749
GLYMA_02G015700	GLYMA_02G015700	0.147969	0.207094	0.188942	0.166527	0.27129	0.129794	0.22736	0.165328	0.209123	0.151996	0.189229	0.153308	0.113825	0.404561	0.179986	0.310481	0.0295455	0.0315361	0.0392157	0.0298013	0.0422277	0.0341151	0.0554804	0.0340514	0.0445895	0.0250329	0.0243902	0.0217084	0.0190955	0.0487805	0.0224719	0.0540541
GLYMA_17G191900	GLYMA_17G191900	0.624098	0.544897	0.358337	0.602405	0.522765	1.27347	1.00185	0.434909	0.816427	0.757179	0.712005	1.02676	0.918098	1.14955	0.637498	0.81919	0.0878788	0.0885046	0.104575	0.0761589	0.0746634	0.187633	0.167794	0.0896456	0.148994	0.118577	0.130081	0.115621	0.124623	0.158537	0.101124	0.108108
GLYMA_19G084600	GLYMA_19G084600	0.758688	1.05182	0.729867	0.706997	0.521617	0.541692	1.20645	0.815705	1.12844	1.85362	1.46159	0.676983	0.649781	0.959855	0.615744	0.634504	0.121212	0.181078	0.117647	0.112583	0.0881273	0.102345	0.215156	0.175122	0.205003	0.220026	0.227642	0.0873053	0.103518	0.170732	0.101124	0.108108
GLYMA_16G142600	GLYMA_16G142600	0.152794	0.157813	0.222333	0.0729541	0.17402	0.131541	0.228107	0.248888	0.170835	0.187235	0.18153	0.171913	0.11432	0.259222	0.129614	0.114926	0.0265152	0.0371312	0.0915033	0.00662252	0.0336597	0.0277186	0.0487145	0.0694927	0.0380642	0.0368906	0.0325203	0.0250118	0.0211055	0.0670732	0.0224719	0.019305
GLYMA_08G094700	GLYMA_08G094700	0.329353	0.258575	0.211721	0.282825	0.352996	0.369698	0.170501	0.212097	0.226121	0.139466	0.380933	0.398062	0.2645	0.325805	0.11208	0.120187	0.0492424	0.0412004	0.0261438	0.0397351	0.0520196	0.0746269	0.037889	0.0444753	0.0380642	0.0210804	0.0406504	0.0453044	0.040201	0.054878	0.0224719	0.030888
GLYMA_07G178700	GLYMA_07G178700	0.949061	1.22871	0.471697	0.914184	0.704655	1.072	1.34481	1.10246	1.67525	1.37417	1.24908	1.12492	1.18885	0.7808	0.694128	1.02261	0.137879	0.199898	0.117647	0.119205	0.0985312	0.153518	0.235453	0.192495	0.272431	0.192358	0.170732	0.120812	0.164824	0.134146	0.11236	0.138996
GLYMA_01G235700	GLYMA_01G235700	0.253295	0.0907942	0.0793849	0.104007	0.194336	0.178197	0.0713337	0.0974914	0.104538	0.190913	0.105449	0.135506	0.134994	0.20667	0.127681	0.103454	0.0386364	0.017294	0.0261438	0.0198675	0.0312118	0.0341151	0.0175913	0.0250174	0.0184883	0.0289855	0.00813008	0.0174611	0.0221106	0.0365854	0.011236	0.015444
GLYMA_19G207500	GLYMA_19G207500	0.129522	0.112873	0.088287	0.0659573	0.234109	0.182194	0.196015	0.0995418	0.126695	0.197982	0.15625	0.184718	0.115619	0.126411	0.0993453	0.0996992	0.0234848	0.0203459	0.0261438	0.013245	0.0324357	0.0447761	0.0351827	0.0243224	0.0277325	0.030303	0.0243902	0.0231241	0.0180905	0.0304878	0.011236	0.019305
GLYMA_12G007700	GLYMA_12G007700	0.119794	0.15595	0.0922652	0.108782	0.0889454	0.144196	0.313308	0.133763	0.184437	0.132997	0.298042	0.0988466	0.169015	0.315671	0.196433	0.26875	0.019697	0.0295015	0.0261438	0.013245	0.0140759	0.0234542	0.0554804	0.0291869	0.0348015	0.0223979	0.0487805	0.0132138	0.0261307	0.0365854	0.011236	0.042471
GLYMA_04G232700	GLYMA_04G232700	0.281371	0.329505	0.12226	0.151674	0.409964	0.335656	0.433883	0.231773	0.266787	0.304352	0.368399	0.394077	0.313498	0.359823	0.396319	0.285252	0.0401515	0.0539166	0.0392157	0.0264901	0.0636475	0.0597015	0.082544	0.0507297	0.0511147	0.055336	0.0650407	0.0467202	0.0472362	0.0609756	0.0561798	0.0617761
GLYMA_20G187700	GLYMA_20G187700	0.153704	0.238248	0.142406	0.274178	0.202631	0.262834	0.261778	0.226363	0.273314	0.147814	0.186041	0.260711	0.134167	0.0772767	0.0800852	0.212708	0.0265152	0.0478128	0.0522876	0.0397351	0.0354957	0.0383795	0.052774	0.0493398	0.0570962	0.0263505	0.0325203	0.0311468	0.0201005	0.0365854	0.011236	0.046332
GLYMA_15G008700	GLYMA_15G008700	2.53433	2.99156	1.61438	2.68576	2.65165	2.03057	3.27833	2.28091	3.62709	3.12426	2.75842	2.88834	3.36989	5.72508	2.15074	1.96568	0.284091	0.370804	0.281046	0.248344	0.301102	0.264392	0.405954	0.337735	0.447526	0.355731	0.308943	0.270411	0.345729	0.512195	0.202247	0.27027
GLYMA_17G002600	GLYMA_17G002600	0.39376	0.412267	0.363469	0.357947	0.479423	0.346716	0.46569	0.406101	0.41662	0.347283	0.138024	0.489454	0.460777	0.22168	0.317217	0.421378	0.0681818	0.0752798	0.0718954	0.0629139	0.0746634	0.0767591	0.097429	0.108409	0.0891789	0.0658762	0.0325203	0.065597	0.0743719	0.0487805	0.0224719	0.0772201
GLYMA_18G035500	GLYMA_18G035500	0.287507	0.284118	0.329035	0.234	0.205306	0.249096	0.280358	0.271248	0.227572	0.226108	0.2363	0.266977	0.265535	0.314369	0.630839	0.177917	0.05	0.0549339	0.117647	0.0430464	0.0416157	0.0511727	0.0554804	0.0694927	0.0511147	0.0474308	0.0325203	0.0344502	0.0462312	0.0670732	0.0449438	0.030888
GLYMA_19G126900	GLYMA_19G126900	0.32522	0.414486	0.546167	0.265764	0.171992	0.154044	0.34958	0.280854	0.341037	0.404585	0.358867	0.281552	0.417634	0.223712	0.358927	0.325938	0.0598485	0.0717192	0.0718954	0.0364238	0.0293758	0.0277186	0.0635995	0.0625434	0.0717781	0.0698287	0.0569106	0.0401133	0.0552764	0.054878	0.0561798	0.046332
GLYMA_17G213500	GLYMA_17G213500	0.62538	0.693651	1.04612	0.937482	0.711874	0.63244	0.759018	0.613539	0.611312	1.07608	0.677726	0.861288	0.58147	0.966563	0.933732	0.303507	0.0984848	0.119023	0.228758	0.0927152	0.101591	0.104478	0.150203	0.125087	0.113649	0.156785	0.113821	0.0957999	0.0924623	0.158537	0.0898876	0.0617761
GLYMA_14G026900	GLYMA_14G026900	1.02287	0.823672	1.04648	0.667317	0.877913	0.842653	0.648681	1.22824	0.825861	0.982738	0.686806	1.12039	1.14127	0.815036	2.29874	1.66533	0.145455	0.130722	0.176471	0.089404	0.118727	0.136461	0.11908	0.217512	0.144644	0.150198	0.105691	0.129306	0.151759	0.189024	0.179775	0.235521
GLYMA_11G113600	GLYMA_11G113600	0.271338	0.337243	0.274837	0.272305	0.312836	0.386981	0.364634	0.300713	0.336613	0.211224	0.359756	0.24937	0.311515	0.109205	0.265732	0.247719	0.0492424	0.0620549	0.0718954	0.0463576	0.0507956	0.0852878	0.0798376	0.0701876	0.0679717	0.0355731	0.0650407	0.0311468	0.0592965	0.054878	0.0337079	0.0617761
GLYMA_10G136100	GLYMA_10G136100	0.305069	0.257504	0.15305	0.177348	0.522012	0.327461	0.246451	0.31396	0.311909	0.326997	0.537516	0.365722	0.313369	0.509032	0.542184	0.426393	0.0462121	0.0513733	0.0588235	0.0298013	0.0924113	0.0767591	0.0622463	0.0694927	0.0603589	0.0592885	0.0731707	0.0490798	0.0522613	0.140244	0.0561798	0.0579151
GLYMA_04G046100	GLYMA_04G046100	0.224694	0.288961	0.138322	0.124464	0.416741	0.404968	0.242423	0.288002	0.340202	0.2504	0.166727	0.440824	0.36719	0.357208	0.14571	0.195741	0.0371212	0.0427263	0.0196078	0.0165563	0.0593635	0.0703625	0.0365359	0.0576789	0.0636215	0.0421607	0.0243902	0.0523832	0.0623116	0.0792683	0.0224719	0.030888
GLYMA_20G173200	GLYMA_20G173200	0.670296	1.0103	1.2524	1.15817	0.447066	0.634866	1.31098	0.468414	1.23505	0.370154	0.413155	0.706534	0.505235	0.83946	0.818996	0.523542	0.1	0.146999	0.300654	0.145695	0.0709914	0.10661	0.196211	0.095205	0.184339	0.0513834	0.0569106	0.0802265	0.0663317	0.134146	0.0786517	0.0617761
GLYMA_09G218500	GLYMA_09G218500	0.181062	0.139247	0.168128	0.164577	0.2685	0.206209	0.233145	0.253222	0.168283	0.493154	0.209213	0.201961	0.202878	0.177785	0.154967	0.261966	0.0325758	0.0320448	0.0588235	0.0298013	0.0385557	0.0383795	0.052774	0.0604587	0.0342577	0.0869565	0.0406504	0.0278433	0.0351759	0.0365854	0.0337079	0.030888
GLYMA_05G198100	GLYMA_05G198100	0.284689	0.24343	0.506634	0.473858	0.381982	0.331802	0.268448	0.254871	0.331485	0.362989	0.60334	0.324379	0.370339	0.217132	0.18796	0.170391	0.0484848	0.0493388	0.117647	0.0629139	0.0520196	0.0660981	0.0514208	0.0583739	0.0652529	0.0619236	0.0813008	0.0429448	0.0643216	0.0670732	0.0337079	0.042471
GLYMA_17G197600	GLYMA_17G197600	0.12409	0.137728	0.199764	0.125392	0.132864	0.1686	0.152712	0.12038	0.189102	0.191122	0.308867	0.180914	0.180254	0.0872393	0.0995213	0.152057	0.0242424	0.0254323	0.0588235	0.0231788	0.0220318	0.0341151	0.0324763	0.028492	0.0304513	0.030303	0.0325203	0.0212364	0.0291457	0.0121951	0.011236	0.034749
GLYMA_10G123100	GLYMA_10G123100	2.10778	3.2629	1.03572	3.01229	1.26854	1.299	2.85722	3.00635	2.79701	2.45009	2.5648	1.9252	2.14895	1.57683	3.29973	3.66574	0.27197	0.43591	0.281046	0.291391	0.183599	0.181237	0.41272	0.429465	0.406743	0.322793	0.268293	0.204342	0.281407	0.292683	0.325843	0.362934
GLYMA_04G203800	GLYMA_04G203800	0.249981	0.226149	0.292691	0.101079	0.319948	0.35768	0.285139	0.189143	0.2075	0.306115	0.170611	0.335662	0.286957	0.150529	0.238103	0.138619	0.0401515	0.0513733	0.0849673	0.0165563	0.0489596	0.0703625	0.067659	0.0403058	0.0483959	0.0461133	0.0406504	0.041529	0.0482412	0.0304878	0.0337079	0.034749
GLYMA_01G146100	GLYMA_01G146100	0.52438	0.437191	0.522741	0.53919	0.415421	0.240787	0.424159	0.329864	0.368745	0.412875	0.368312	0.361173	0.357489	0.732086	0.536654	0.206912	0.0818182	0.0722279	0.143791	0.0662252	0.0703794	0.0575693	0.0852503	0.0708826	0.0739532	0.0645586	0.0487805	0.0438886	0.0592965	0.128049	0.0674157	0.03861
GLYMA_18G118100	GLYMA_18G118100	0.533024	0.312329	0.494805	0.305793	0.983738	0.986134	0.360421	0.748083	0.370528	0.933316	0.468769	1.08182	0.739678	0.69599	0.756908	0.354244	0.0727273	0.0569685	0.0980392	0.0463576	0.149327	0.144989	0.0717185	0.14246	0.074497	0.131752	0.0569106	0.121284	0.101508	0.146341	0.101124	0.0501931
GLYMA_04G212900	GLYMA_04G212900	1.08285	1.5686	1.75222	0.840456	1.10477	0.4953	1.25713	1.74451	1.58118	1.44885	0.897506	1.08927	1.37304	1.12811	0.659621	0.907833	0.154545	0.250254	0.352941	0.102649	0.158507	0.102345	0.211096	0.297429	0.258836	0.204216	0.146341	0.121284	0.18191	0.182927	0.0786517	0.166023
GLYMA_20G064700	GLYMA_20G064700	1.04434	0.918071	1.13279	1.18637	0.500008	0.478589	1.05039	0.537077	0.726163	0.645678	1.26761	0.630544	0.6288	0.617708	0.358389	0.57088	0.15303	0.167854	0.30719	0.152318	0.0850673	0.0938166	0.179973	0.115358	0.1441	0.111989	0.154472	0.077395	0.0984925	0.152439	0.0449438	0.0926641
GLYMA_20G242900	GLYMA_20G242900	0.156901	0.189964	0.0966769	0.134271	0.130257	0.242689	0.140903	0.223923	0.188749	0.0686248	0.221043	0.228318	0.167788	0.166403	0.0724026	0.146007	0.0265152	0.0325534	0.0392157	0.0231788	0.0214198	0.0426439	0.0311231	0.0514246	0.0402393	0.0144928	0.0325203	0.0292591	0.0291457	0.0182927	0.0224719	0.030888
GLYMA_14G224200	GLYMA_14G224200	0.574327	0.456991	0.761148	0.45828	1.05498	0.94559	0.372312	0.689875	0.474788	0.680748	0.454225	1.25271	0.736555	1.18391	1.31637	0.798239	0.0924242	0.0824008	0.189542	0.0662252	0.156059	0.149254	0.0771313	0.140375	0.100054	0.109354	0.0650407	0.140632	0.114573	0.20122	0.179775	0.100386
GLYMA_10G298900	GLYMA_10G298900	1.408	1.3848	1.38907	1.55007	0.708308	0.58042	0.82843	0.935903	0.783301	0.850168	0.923798	0.666263	0.602145	0.438503	0.778718	0.538282	0.195455	0.217701	0.339869	0.178808	0.104039	0.0916844	0.136671	0.184156	0.146819	0.123847	0.113821	0.0792827	0.0864322	0.109756	0.11236	0.0926641
GLYMA_07G208600	GLYMA_07G208600	1.38747	1.80471	2.91499	1.52351	2.05326	1.80297	1.2438	2.12781	1.94873	1.75783	4.01327	1.92355	1.77232	2.055	1.13569	1.98249	0.198485	0.278739	0.496732	0.165563	0.267442	0.249467	0.201624	0.33704	0.319739	0.247694	0.365854	0.208589	0.244221	0.341463	0.157303	0.247104
GLYMA_03G133700	GLYMA_03G133700	0.636164	0.640591	0.312983	0.407934	0.601048	0.297674	0.56699	0.600104	0.611484	0.702051	0.411199	0.826267	0.790108	0.461559	1.05189	0.57981	0.0931818	0.115972	0.0915033	0.0562914	0.0905753	0.0639659	0.108254	0.123002	0.113649	0.110672	0.0650407	0.0939122	0.113568	0.128049	0.0898876	0.108108
GLYMA_15G005300	GLYMA_15G005300	0.896899	0.941631	0.299286	0.655321	1.0085	0.890214	0.59349	0.996036	0.72856	0.535386	0.473986	0.771309	0.734543	0.620777	0.285415	0.754455	0.139394	0.157681	0.0915033	0.089404	0.141371	0.153518	0.11502	0.18763	0.132681	0.0724638	0.0813008	0.0887211	0.111558	0.0853659	0.0449438	0.127413
GLYMA_14G044900	GLYMA_14G044900	0.603259	0.592278	0.639169	0.516831	0.683444	0.964239	0.613858	0.4629	0.522289	0.770025	0.492667	0.774723	0.471116	0.272941	0.799157	0.333472	0.0856061	0.0991862	0.0915033	0.0629139	0.0881273	0.144989	0.116373	0.095205	0.0989668	0.118577	0.0731707	0.0811704	0.0703518	0.0731707	0.0674157	0.0617761
GLYMA_10G292700	GLYMA_10G292700	0.574715	0.644779	0.389589	1.03866	0.58719	0.605577	0.692516	0.432335	0.582394	0.470969	0.659632	0.519576	0.430379	0.294082	0.402184	0.386167	0.0825758	0.10885	0.117647	0.109272	0.0764994	0.0916844	0.117727	0.086171	0.113649	0.0764163	0.0894309	0.0599339	0.0733668	0.0914634	0.0449438	0.0733591
GLYMA_09G068600	GLYMA_09G068600	0.870488	1.02848	0.698606	0.745012	0.826609	1.23781	1.06132	0.770709	1.01827	1.00286	1.23381	0.967972	0.848935	2.43344	0.689052	0.740481	0.125	0.164802	0.156863	0.115894	0.118727	0.189765	0.202977	0.145935	0.177814	0.160738	0.146341	0.115149	0.119598	0.329268	0.0898876	0.111969
GLYMA_10G262300	GLYMA_10G262300	0.29127	0.268533	0.266332	0.155168	0.457146	0.263716	0.368885	0.232883	0.372273	0.259167	0.309392	0.35688	0.27913	0.547971	0.374889	0.203335	0.044697	0.0478128	0.0522876	0.0264901	0.0709914	0.0618337	0.0757781	0.0465601	0.0734095	0.0434783	0.0325203	0.0405852	0.0422111	0.115854	0.0337079	0.0579151
GLYMA_17G166800	GLYMA_17G166800	0.132264	0.261495	0.0876835	0.161982	0.132844	0.123352	0.195482	0.250027	0.301844	0.219081	0.307473	0.26128	0.183509	0.289209	0.210034	0.309586	0.0272727	0.0523906	0.0457516	0.0231788	0.0201958	0.0277186	0.0487145	0.0535094	0.0663404	0.0355731	0.0487805	0.0344502	0.0321608	0.0731707	0.0337079	0.0656371
GLYMA_04G073900	GLYMA_04G073900	0.476937	0.506138	0.258707	0.892124	0.482063	0.364292	0.545686	0.354161	0.646459	0.603887	0.783171	0.555695	0.506901	0.67515	0.252789	0.728007	0.0787879	0.0920651	0.0849673	0.0695364	0.0771114	0.0703625	0.110961	0.0792217	0.124524	0.0974967	0.097561	0.0670127	0.0864322	0.128049	0.0337079	0.127413
GLYMA_20G199000	GLYMA_20G199000	0.220558	0.199429	0.209337	0.166743	0.208146	0.323385	0.382268	0.197186	0.270611	0.163814	0.271108	0.426437	0.345218	0.211484	0.120858	0.325624	0.0295455	0.0417091	0.0784314	0.0264901	0.0348837	0.0597015	0.0717185	0.0486449	0.0500272	0.0329381	0.0406504	0.0514394	0.0532663	0.0304878	0.0337079	0.0694981
GLYMA_01G229500	GLYMA_01G229500	0.497794	0.624393	0.632475	1.04694	0.788618	0.927866	0.50573	0.521247	0.388628	0.558665	0.367519	0.544315	0.491753	0.29672	0.509339	0.69005	0.080303	0.103764	0.176471	0.115894	0.103427	0.134328	0.106901	0.102154	0.0783034	0.0843215	0.0813008	0.0670127	0.0753769	0.0670732	0.0786517	0.100386
GLYMA_08G030200	GLYMA_08G030200	0.192291	0.0847145	0.12466	0.204368	0.298888	0.167524	0.0860308	0.159105	0.0881656	0.121812	0.149039	0.148929	0.118509	0.137706	0.223241	0.129972	0.0333333	0.0193286	0.0326797	0.0264901	0.0526316	0.0341151	0.0202977	0.0305768	0.0212072	0.0223979	0.00813008	0.0221803	0.0211055	0.0365854	0.0337079	0.023166
GLYMA_13G175800	GLYMA_13G175800	0.124858	0.0879832	0.140231	0.0589176	0.132497	0.151948	0.150323	0.141953	0.124526	0.110268	0.0703305	0.139882	0.0934816	0.0863334	0.207844	0.0917943	0.019697	0.0183113	0.0457516	0.00993377	0.0244798	0.0298507	0.0365359	0.0298819	0.0244698	0.0237154	0.0162602	0.0169891	0.0211055	0.0121951	0.0224719	0.011583
GLYMA_08G222000	GLYMA_08G222000	0.290181	0.365036	0.253298	0.431157	0.368255	0.386416	0.258193	0.355953	0.308153	0.499689	0.469215	0.510642	0.48897	0.419286	0.144791	0.437835	0.0484848	0.0620549	0.0980392	0.0596026	0.0618115	0.0810235	0.0473613	0.076442	0.0598151	0.0724638	0.0894309	0.0618216	0.0673367	0.0609756	0.0224719	0.0733591
GLYMA_06G182600	GLYMA_06G182600	0.197145	0.220295	0.100961	0.240545	0.139574	0.137475	0.206197	0.195452	0.167769	0.129894	0.0746247	0.171124	0.122741	0.149877	0.174235	0.0682108	0.0310606	0.0442523	0.0261438	0.0298013	0.0214198	0.0234542	0.0351827	0.0354413	0.0331702	0.0237154	0.0162602	0.0198207	0.0140704	0.0182927	0.0337079	0.011583
GLYMA_07G026800	GLYMA_07G026800	0.658964	0.892885	0.791047	0.680934	0.758507	0.661237	0.776169	0.867284	0.961245	0.705262	0.646897	0.797243	0.609499	0.341725	0.272752	0.920936	0.0939394	0.163276	0.163399	0.089404	0.120563	0.104478	0.132612	0.175122	0.17727	0.108037	0.0813008	0.0934403	0.0864322	0.054878	0.0337079	0.146718
GLYMA_07G182900	GLYMA_07G182900	0.238942	0.474547	0.320636	0.408161	0.410632	0.841922	0.441176	0.40551	0.407953	0.348763	0.417973	0.298224	0.423996	0.431206	0.315555	0.254018	0.0378788	0.0859613	0.104575	0.0331126	0.0648715	0.113006	0.104195	0.0917304	0.0815661	0.0619236	0.0731707	0.0438886	0.0633166	0.0731707	0.0449438	0.0540541
GLYMA_18G287400	GLYMA_18G287400	0.330816	0.293863	0.167477	0.467426	0.237717	0.292932	0.261447	0.18757	0.198644	0.279306	0.216542	0.193957	0.160568	0.132682	0.133664	0.385497	0.0515152	0.0523906	0.0522876	0.0562914	0.0403917	0.0597015	0.0500677	0.0403058	0.0402393	0.0421607	0.0406504	0.0231241	0.0261307	0.0426829	0.0224719	0.0810811
GLYMA_08G165800	GLYMA_08G165800	0.376234	0.577978	0.877208	0.567722	0.34642	0.385266	0.483044	0.474016	0.478871	0.382775	0.885274	0.394914	0.426956	0.47575	0.251293	0.879242	0.0651515	0.107833	0.189542	0.0927152	0.0569155	0.0618337	0.106901	0.102849	0.0995106	0.057971	0.113821	0.0490798	0.0693467	0.097561	0.0337079	0.135135
GLYMA_11G056000	GLYMA_11G056000	6.63478	6.37479	2.8382	5.75479	6.11898	7.25259	7.15443	6.86849	8.39276	7.86589	8.15721	7.73572	7.87801	5.98338	6.90388	9.99535	0.561364	0.600712	0.431373	0.42053	0.507956	0.609808	0.64682	0.663655	0.705818	0.644269	0.593496	0.53327	0.61608	0.573171	0.505618	0.660232
GLYMA_12G241100	GLYMA_12G241100	0.0861152	0.152382	0.0432698	0.0590628	0.126702	0.0779389	0.0677768	0.149911	0.120094	0.139433	0.0648977	0.117093	0.143719	0.090209	0.0887756	0.0449212	0.0143939	0.0315361	0.0130719	0.00662252	0.0220318	0.0170576	0.0162382	0.0347464	0.0222947	0.0223979	0.0162602	0.0127419	0.0201005	0.0243902	0.0224719	0.015444
GLYMA_04G058600	GLYMA_04G058600	0.197613	0.259494	0.237652	0.0997558	0.226678	0.190018	0.351205	0.209461	0.249423	0.245154	0.254335	0.269149	0.33457	0.173537	0.223111	0.255786	0.0348485	0.0600203	0.0196078	0.0165563	0.0354957	0.0383795	0.0784844	0.0583739	0.0609027	0.0421607	0.0487805	0.0377537	0.0603015	0.0487805	0.0224719	0.0501931
GLYMA_16G006500	GLYMA_16G006500	0.510175	0.577395	0.207653	0.198263	0.482483	0.516533	0.336006	0.685076	0.454368	0.357571	0.279015	0.543653	0.671363	0.227271	0.194649	0.522752	0.0795455	0.112411	0.0457516	0.0364238	0.0722154	0.098081	0.0690122	0.140375	0.0902664	0.0658762	0.0487805	0.0698443	0.0974874	0.0609756	0.0337079	0.0810811
GLYMA_13G320200	GLYMA_13G320200	1.32265	1.2823	1.63438	1.13206	1.49062	1.38819	1.24503	1.06419	0.835917	1.31407	0.695209	1.38341	0.850453	1.43935	0.464436	1.13724	0.184848	0.198881	0.359477	0.165563	0.201346	0.221748	0.220568	0.198054	0.157151	0.181818	0.113821	0.161397	0.128643	0.256098	0.101124	0.158301
GLYMA_05G191400	GLYMA_05G191400	0.255333	0.192108	0.220635	0.366818	0.282884	0.184689	0.239555	0.280311	0.147547	0.389061	0.141814	0.281254	0.173987	0.235301	0.258802	0.110609	0.0378788	0.0356053	0.0718954	0.0529801	0.0465116	0.0255864	0.0460081	0.0687978	0.0293638	0.0724638	0.0325203	0.0353941	0.0321608	0.0365854	0.0449438	0.027027
GLYMA_10G033900	GLYMA_10G033900	0.77418	0.493202	0.241116	0.355087	0.575233	0.820721	0.76377	0.40123	0.508444	0.557305	0.546619	0.767642	0.569007	0.453428	0.847945	0.529493	0.0992424	0.0844354	0.0653595	0.0596026	0.0973072	0.132196	0.131258	0.0896456	0.0940729	0.100132	0.0731707	0.0906088	0.0834171	0.0914634	0.0898876	0.108108
GLYMA_10G279900	GLYMA_10G279900	0.274649	0.302991	0.224084	0.243258	0.288512	0.192682	0.105092	0.280486	0.237917	0.295648	0.369498	0.283739	0.251491	0.193957	0.301321	0.136114	0.0386364	0.0600203	0.0784314	0.0364238	0.0507956	0.0469083	0.0311231	0.066713	0.0494834	0.0474308	0.0487805	0.0372817	0.039196	0.054878	0.0337079	0.030888
GLYMA_19G180500	GLYMA_19G180500	0.311822	0.243684	0.131209	0.137081	0.461246	0.354375	0.26262	0.224165	0.177543	0.239874	0.195109	0.304507	0.265256	0.448156	0.169943	0.207123	0.0454545	0.0508647	0.0653595	0.0231788	0.0709914	0.0618337	0.052774	0.0493398	0.0396955	0.0434783	0.0325203	0.0377537	0.0321608	0.109756	0.0224719	0.030888
GLYMA_08G004700	GLYMA_08G004700	0.289892	0.255632	0.12003	0.212161	0.393317	0.344389	0.269437	0.217095	0.16241	0.235062	0.176046	0.224594	0.111893	0.244115	0.172639	0.226751	0.0401515	0.0422177	0.0392157	0.0364238	0.0550796	0.0639659	0.0433018	0.0403058	0.0299076	0.0342556	0.0325203	0.023596	0.0160804	0.0487805	0.0224719	0.034749
GLYMA_15G168600	GLYMA_15G168600	0.390656	0.252167	0.289255	0.337357	0.258059	0.182504	0.293592	0.301554	0.221278	0.169042	0.218866	0.168976	0.111147	0.251574	0.342155	0.353161	0.0545455	0.0523906	0.0588235	0.0430464	0.0379437	0.0469083	0.0541272	0.0674079	0.0418706	0.027668	0.0406504	0.024068	0.0180905	0.0609756	0.0224719	0.0694981
GLYMA_14G122700	GLYMA_14G122700	0.364866	0.449043	0.295529	0.181197	0.47576	0.372293	0.449724	0.474492	0.468286	0.484309	0.553288	0.636611	0.541141	0.52843	0.625981	0.25227	0.0621212	0.0829095	0.0718954	0.0264901	0.0734394	0.0746269	0.0771313	0.105629	0.0853725	0.0724638	0.0731707	0.0783388	0.0743719	0.128049	0.0786517	0.0579151
GLYMA_17G001500	GLYMA_17G001500	0.408994	0.48733	0.925038	0.373345	0.943953	1.01091	0.582477	0.442549	0.42329	0.481624	0.770011	0.778061	0.563232	1.31142	0.707205	0.593814	0.0742424	0.0834181	0.20915	0.0562914	0.146879	0.166311	0.109608	0.095205	0.0815661	0.0777339	0.105691	0.0948561	0.0844221	0.237805	0.0898876	0.0926641
GLYMA_20G079100	GLYMA_20G079100	0.421925	0.371226	0.258571	0.490984	0.457494	0.313685	0.471298	0.41136	0.472285	0.621584	0.72101	0.502962	0.513684	0.465783	0.205264	0.445649	0.0780303	0.0793489	0.0915033	0.0761589	0.0795594	0.0767591	0.102842	0.0979847	0.104948	0.100132	0.121951	0.0627655	0.0844221	0.109756	0.0337079	0.104247
GLYMA_06G173500	GLYMA_06G173500	2.97409	2.60347	2.62536	2.40434	3.07189	4.93536	3.11308	2.68603	3.52383	4.16326	3.09225	3.58575	3.34858	2.52715	1.7676	1.40554	0.339394	0.365717	0.45098	0.291391	0.347613	0.490405	0.435724	0.407922	0.471996	0.45191	0.333333	0.326097	0.374874	0.371951	0.191011	0.19305
GLYMA_02G304700	GLYMA_02G304700	0.318626	0.398176	0.222918	0.117027	0.309639	0.321447	0.305287	0.343663	0.366039	0.308637	0.150025	0.410885	0.383266	0.195141	0.144607	0.327899	0.0568182	0.0747711	0.0261438	0.0165563	0.0501836	0.0660981	0.0649526	0.0840862	0.0810223	0.0513834	0.0243902	0.0523832	0.0572864	0.0426829	0.011236	0.046332
GLYMA_02G203000	GLYMA_02G203000	0.115007	0.143235	0.139556	0.138141	0.242121	0.273734	0.256409	0.111527	0.0965985	0.160479	0.315526	0.142676	0.150345	0.115378	0.11838	0.0898842	0.019697	0.0305188	0.0457516	0.0165563	0.0330477	0.0469083	0.0446549	0.0243224	0.0228385	0.0289855	0.0325203	0.0184049	0.0241206	0.0365854	0.0224719	0.015444
GLYMA_19G248000	GLYMA_19G248000	0.667164	0.665305	0.531729	0.507387	0.840343	1.55739	0.444029	0.594766	0.523413	0.751215	1.01232	0.827777	0.711049	0.488267	0.443764	0.65361	0.0916667	0.106307	0.0980392	0.0629139	0.119339	0.226013	0.0784844	0.114663	0.0940729	0.105402	0.105691	0.0967437	0.0984925	0.097561	0.0674157	0.11583
GLYMA_01G134400	GLYMA_01G134400	0.428995	0.648072	0.699939	0.924163	0.464052	0.383991	0.559548	0.479746	0.496598	0.370024	0.295351	0.409956	0.365845	0.263346	0.337773	0.339761	0.075	0.119023	0.189542	0.13245	0.0752754	0.0767591	0.123139	0.111883	0.104948	0.0632411	0.0487805	0.0552147	0.0592965	0.0609756	0.0449438	0.0810811
GLYMA_03G088200	GLYMA_03G088200	0.615889	0.52361	0.287535	0.367716	0.917912	1.00894	0.510675	0.797725	0.568893	0.816099	0.672117	0.955966	0.783675	0.480907	0.466226	0.758354	0.0939394	0.0971516	0.0849673	0.0463576	0.133415	0.172708	0.109608	0.150104	0.113105	0.118577	0.0894309	0.10807	0.108543	0.103659	0.0674157	0.119691
GLYMA_15G202500	GLYMA_15G202500	0.0521612	0.04964	0.0450444	0.0544615	0.0469361	0.141012	0.0869892	0.0612283	0.155783	0.0894915	0.127159	0.10994	0.0770766	0.0480665	0.15803	0.0457824	0.0106061	0.0101729	0.00653595	0.00331126	0.00734394	0.0255864	0.014885	0.0125087	0.0293638	0.0144928	0.0162602	0.0141576	0.0110553	0.0121951	0.011236	0.00772201
GLYMA_08G224200	GLYMA_08G224200	0.355585	0.267205	0.200417	0.170912	0.599577	0.368432	0.44954	0.30796	0.375884	0.175838	0.312192	0.419054	0.317116	0.172139	0.186359	0.280566	0.055303	0.0478128	0.0392157	0.0331126	0.0881273	0.0746269	0.0703654	0.0625434	0.0679717	0.0250329	0.0325203	0.0509674	0.0492462	0.0365854	0.0337079	0.03861
GLYMA_17G093800	GLYMA_17G093800	0.17913	0.237395	0.146692	0.356485	0.214586	0.142051	0.177607	0.188668	0.21886	0.231325	0.275616	0.221887	0.142766	0.252425	0.287566	0.101619	0.0333333	0.0422177	0.0326797	0.0397351	0.0330477	0.0277186	0.0351827	0.0403058	0.0467645	0.0395257	0.0406504	0.0273714	0.0241206	0.0426829	0.0224719	0.023166
GLYMA_02G138900	GLYMA_02G138900	0.406211	0.456883	0.515135	0.344471	0.54128	0.344312	0.409716	0.376169	0.411495	0.420161	0.154305	0.462663	0.393257	0.423083	0.461122	0.334257	0.0727273	0.0768057	0.150327	0.0496689	0.0813953	0.0746269	0.0838972	0.0806115	0.0815661	0.0764163	0.0325203	0.0575743	0.0633166	0.0792683	0.0561798	0.0772201
GLYMA_19G263600	GLYMA_19G263600	0.754002	0.795688	0.447858	0.48429	0.886125	1.18755	1.13579	0.772648	0.816326	0.883392	0.338615	1.0219	0.964433	0.654234	0.825634	0.866191	0.115909	0.149542	0.117647	0.0596026	0.159731	0.211087	0.198917	0.168867	0.164763	0.14888	0.0731707	0.124115	0.133668	0.158537	0.0786517	0.166023
GLYMA_15G176400	GLYMA_15G176400	1.16645	1.3657	0.548668	0.707722	1.15691	1.92421	1.2897	1.38203	1.74067	1.49266	1.34108	1.45723	1.43664	1.36978	1.49219	1.09414	0.162879	0.207019	0.130719	0.102649	0.170135	0.264392	0.209743	0.250869	0.274606	0.212121	0.178862	0.164228	0.201005	0.213415	0.202247	0.169884
GLYMA_02G113500	GLYMA_02G113500	0.0728032	0.153524	0.10786	0.0935924	0.157136	0.171325	0.123458	0.207382	0.0922075	0.0768201	0.0730065	0.172708	0.174946	0.0591571	0.187645	0.0786529	0.0128788	0.0289929	0.0326797	0.013245	0.0238678	0.0277186	0.0230041	0.0451703	0.0179445	0.0144928	0.0243902	0.0207645	0.0221106	0.0243902	0.0224719	0.011583
GLYMA_15G136100	GLYMA_15G136100	0.525248	0.434534	0.751339	0.572703	0.990984	0.794386	0.551504	0.408758	0.36161	0.465158	0.771648	0.714527	0.53137	0.926036	1.267	0.615034	0.0704545	0.077823	0.176471	0.0761589	0.141371	0.115139	0.110961	0.0917304	0.0766721	0.0816864	0.121951	0.0863615	0.0763819	0.20122	0.146067	0.104247
GLYMA_08G001700	GLYMA_08G001700	0.181124	0.187742	0.108141	0.164246	0.359898	0.300975	0.295237	0.256069	0.210994	0.26027	0.147325	0.378891	0.280285	0.149587	0.154568	0.310064	0.0295455	0.0386572	0.0457516	0.0231788	0.0532436	0.0618337	0.0541272	0.0535094	0.0445895	0.0408432	0.0243902	0.0457763	0.0482412	0.0487805	0.0224719	0.0579151
GLYMA_11G096400	GLYMA_11G096400	3.26852	1.75411	2.99149	1.17407	2.13398	1.91072	2.81012	2.57095	2.57454	1.96439	0.950141	2.24941	2.33847	3.32893	1.17409	1.50588	0.340909	0.258393	0.444444	0.142384	0.241126	0.217484	0.336942	0.355803	0.37031	0.250329	0.130081	0.22369	0.274372	0.432927	0.11236	0.200772
GLYMA_02G011400	GLYMA_02G011400	0.208841	0.230667	0.175779	0.115889	0.285078	0.354521	0.121245	0.19908	0.190953	0.231362	0.400993	0.212383	0.243397	0.166824	0.406026	0.16937	0.0356061	0.0513733	0.0588235	0.0198675	0.0483476	0.0575693	0.0351827	0.0555942	0.0424144	0.0355731	0.0406504	0.0302029	0.0361809	0.0182927	0.0674157	0.030888
GLYMA_13G021600	GLYMA_13G021600	3.48733	2.38633	3.01619	3.75412	8.3605	8.01003	4.63023	3.71751	3.62576	7.10038	3.52142	4.33122	4.0117	3.2874	3.96185	3.46694	0.318182	0.272635	0.379085	0.304636	0.49082	0.550107	0.376184	0.4246	0.378467	0.495389	0.300813	0.326569	0.355779	0.390244	0.280899	0.312741
GLYMA_17G211100	GLYMA_17G211100	0.652092	0.724457	0.562201	0.426153	1.23606	1.26709	0.533997	0.959886	0.75876	0.524789	0.779117	1.09735	0.759373	1.49257	1.45746	0.515138	0.106818	0.137843	0.156863	0.0728477	0.178703	0.19403	0.097429	0.182071	0.146275	0.0869565	0.113821	0.126947	0.121608	0.262195	0.168539	0.100386
GLYMA_10G280700	GLYMA_10G280700	0.323776	0.365538	0.420157	0.471487	0.636755	0.457231	0.448408	0.300315	0.341569	0.521226	0.31753	0.488608	0.442931	0.668701	0.19094	0.449702	0.0469697	0.0752798	0.117647	0.0695364	0.106487	0.08742	0.0771313	0.0708826	0.0717781	0.0895916	0.0487805	0.0622935	0.0683417	0.134146	0.0337079	0.0849421
GLYMA_06G240600	GLYMA_06G240600	0.236107	0.289536	0.371473	0.270754	0.401983	0.252421	0.239155	0.256993	0.217144	0.246241	0.201549	0.292539	0.211165	0.690795	0.197269	0.217147	0.0393939	0.0559512	0.111111	0.0364238	0.0758874	0.0511727	0.0419486	0.0590688	0.0424144	0.0487484	0.0487805	0.0405852	0.0351759	0.164634	0.0224719	0.042471
GLYMA_07G090200	GLYMA_07G090200	0.300007	0.286047	0.268176	0.51423	0.404887	0.294418	0.343983	0.330671	0.256007	0.261595	0.561636	0.400684	0.324487	0.499356	0.160442	0.296243	0.044697	0.0559512	0.117647	0.0596026	0.0703794	0.0597015	0.067659	0.0736623	0.0483959	0.0434783	0.097561	0.0509674	0.0552764	0.115854	0.0337079	0.0579151
GLYMA_08G042200	GLYMA_08G042200	1.53159	1.55745	1.11165	1.42196	1.22895	1.14664	2.06614	1.26347	1.75868	0.875022	0.997904	1.3517	1.23334	1.1287	0.590236	1.08349	0.206061	0.255849	0.228758	0.15894	0.163403	0.19403	0.313938	0.232106	0.284937	0.151515	0.178862	0.151487	0.175879	0.207317	0.0786517	0.15444
GLYMA_17G094000	GLYMA_17G094000	0.176078	0.155497	0.0850561	0.254558	0.139945	0.122985	0.227475	0.184808	0.17131	0.0852675	0.0727215	0.118128	0.165782	0.108127	0.152411	0.249693	0.0257576	0.0315361	0.0392157	0.0364238	0.0250918	0.0298507	0.0446549	0.0416956	0.033714	0.0171278	0.0162602	0.0160453	0.0251256	0.0365854	0.0337079	0.03861
GLYMA_07G009200	GLYMA_07G009200	0.467814	0.476032	0.276225	0.251253	0.518512	0.654174	0.364684	0.395796	0.459006	0.387506	0.363535	0.494885	0.408254	0.444516	0.879232	0.380187	0.0810606	0.0869786	0.0392157	0.0364238	0.0875153	0.102345	0.0798376	0.0889507	0.0967917	0.0685112	0.0569106	0.065597	0.0683417	0.097561	0.0786517	0.0617761
GLYMA_05G243600	GLYMA_05G243600	0.150789	0.206122	0.200354	0.247434	0.256058	0.18668	0.169637	0.158165	0.176626	0.152159	0.073178	0.200174	0.203013	0.163781	0.142584	0.253137	0.0318182	0.0417091	0.0653595	0.0463576	0.0397797	0.0405117	0.0433018	0.038221	0.0369766	0.0289855	0.00813008	0.0250118	0.0351759	0.0365854	0.0337079	0.0656371
GLYMA_19G184800	GLYMA_19G184800	0.430587	0.365861	0.465464	0.313496	0.427964	0.281826	0.34477	0.348724	0.380116	0.51997	0.530053	0.420241	0.379225	0.963255	0.275311	0.329566	0.075	0.0635809	0.104575	0.0397351	0.0740514	0.0618337	0.0622463	0.0743572	0.0734095	0.0764163	0.0813008	0.0547428	0.0592965	0.152439	0.0337079	0.0579151
GLYMA_09G017400	GLYMA_09G017400	0.294704	0.181804	0.410874	0.335096	0.15092	0.183186	0.168798	0.255728	0.219573	0.208535	0.136397	0.172409	0.221291	0.117435	0.39181	0.197629	0.0515152	0.0386572	0.137255	0.0430464	0.0312118	0.0469083	0.0338295	0.0618485	0.045677	0.0355731	0.0325203	0.0226522	0.039196	0.0304878	0.0561798	0.046332
GLYMA_17G249900	GLYMA_17G249900	0.306145	0.32493	0.266819	0.304026	0.624773	0.700386	0.433399	0.338028	0.280954	0.336691	0.294875	0.497473	0.361044	0.214603	0.620605	0.200196	0.05	0.0554425	0.0653595	0.0364238	0.0893513	0.119403	0.082544	0.0604587	0.0522023	0.0474308	0.0487805	0.0589901	0.0592965	0.0426829	0.0786517	0.030888
GLYMA_08G304300	GLYMA_08G304300	0.34161	0.302313	0.603359	0.350004	0.579303	0.39492	0.457263	0.415974	0.339351	0.555393	0.353874	0.366908	0.369123	0.390848	1.05733	0.31254	0.0621212	0.0620549	0.143791	0.0463576	0.102815	0.0746269	0.0960758	0.0938151	0.0717781	0.102767	0.0569106	0.0509674	0.0693467	0.0792683	0.134831	0.0694981
GLYMA_07G151700	GLYMA_07G151700	1.09154	1.44292	1.89065	1.73097	1.10987	0.684908	1.35954	1.21289	0.903228	1.03147	1.11507	0.772273	0.725327	1.09227	1.9015	0.543705	0.168182	0.231434	0.398693	0.221854	0.169523	0.100213	0.224628	0.23975	0.170745	0.160738	0.162602	0.101935	0.115578	0.195122	0.213483	0.104247
GLYMA_02G192500	GLYMA_02G192500	0.190699	0.352505	0.18565	0.348257	0.266639	0.246615	0.331231	0.403476	0.381133	0.414937	0.21059	0.410621	0.421985	0.198298	0.120671	0.352551	0.0378788	0.0671414	0.0522876	0.0430464	0.0452876	0.0533049	0.0690122	0.0785268	0.0810223	0.0619236	0.0325203	0.0500236	0.0683417	0.054878	0.0224719	0.046332
GLYMA_10G036900	GLYMA_10G036900	0.162996	0.130707	0.21947	0.253872	0.182086	0.196494	0.126589	0.103331	0.171376	0.135392	0.105723	0.150234	0.118557	0.0726126	0.152043	0.135174	0.0227273	0.0254323	0.0718954	0.0331126	0.0318237	0.0383795	0.02977	0.0257123	0.0320827	0.0197628	0.0162602	0.0198207	0.0180905	0.0182927	0.011236	0.019305
GLYMA_15G131100	GLYMA_15G131100	0.694518	0.693437	0.392001	0.798818	0.773436	0.859754	0.534444	0.580236	0.595	0.530288	0.334272	0.594301	0.440617	0.371124	0.245913	0.307601	0.0954545	0.100203	0.104575	0.0629139	0.104039	0.127932	0.0866035	0.0945101	0.101686	0.0698287	0.0650407	0.0641812	0.0653266	0.0792683	0.0337079	0.046332
GLYMA_05G001200	GLYMA_05G001200	0.202023	0.12392	0.287461	0.143543	0.241618	0.277695	0.21973	0.137996	0.12141	0.210738	0.23271	0.225683	0.188231	0.416256	0.424395	0.2335	0.0371212	0.0223805	0.0718954	0.0231788	0.0410037	0.0511727	0.0446549	0.0271022	0.0244698	0.030303	0.0243902	0.0264276	0.0241206	0.0731707	0.0449438	0.023166
GLYMA_11G015900	GLYMA_11G015900	0.124606	0.17786	0.112351	0.0768798	0.239993	0.120729	0.226871	0.26863	0.256615	0.134172	0.132153	0.182887	0.164805	0.120253	0.0945787	0.0871909	0.0234848	0.0325534	0.0196078	0.00993377	0.0367197	0.021322	0.0500677	0.0632384	0.0494834	0.0250329	0.0243902	0.0231241	0.0261307	0.0243902	0.011236	0.011583
GLYMA_17G259200	GLYMA_17G259200	1.198	1.19919	0.985045	1.48259	1.20801	1.39788	1.3254	1.39656	2.24153	1.97324	1.179	1.35045	1.62352	1.57551	0.64162	1.27431	0.156061	0.189217	0.24183	0.162252	0.168299	0.238806	0.213802	0.246004	0.34584	0.262187	0.162602	0.151487	0.217085	0.27439	0.101124	0.173745
GLYMA_19G056400	GLYMA_19G056400	0.131381	0.196617	0.0562839	0.114994	0.139515	0.116115	0.138319	0.0841127	0.162042	0.0909448	0.179937	0.162846	0.183983	0.0946595	0.163838	0.0907458	0.0242424	0.0284842	0.0130719	0.0165563	0.0214198	0.0277186	0.0257104	0.0159833	0.02882	0.0144928	0.0243902	0.0188768	0.0301508	0.0243902	0.0337079	0.011583
GLYMA_19G179700	GLYMA_19G179700	0.127628	0.102402	0.0947929	0.143682	0.244559	0.1255	0.121057	0.157973	0.0731816	0.142756	0.246537	0.255584	0.104971	0.206638	0.1801	0.126808	0.0212121	0.0178026	0.0326797	0.0231788	0.0416157	0.0170576	0.0230041	0.0375261	0.0163132	0.0237154	0.0325203	0.0302029	0.0160804	0.0487805	0.0224719	0.019305
GLYMA_09G224100	GLYMA_09G224100	0.352534	0.418403	0.164496	0.313246	0.408587	0.415832	0.405089	0.340712	0.395707	0.48422	0.506988	0.396472	0.413201	0.145183	0.483021	0.503369	0.0613636	0.0808749	0.0522876	0.0496689	0.0636475	0.08742	0.0960758	0.0715775	0.0799347	0.0790514	0.0813008	0.047664	0.0703518	0.0426829	0.0561798	0.0694981
GLYMA_08G111200	GLYMA_08G111200	0.423618	0.349297	0.32579	0.172169	0.579097	0.47025	0.450956	0.47649	0.591434	0.562748	0.428924	0.549585	0.6012	0.294808	0.368678	0.501109	0.0636364	0.0600203	0.0915033	0.0331126	0.0832313	0.0810235	0.082544	0.0840862	0.104405	0.0803689	0.0813008	0.0660689	0.0753769	0.0853659	0.0561798	0.0772201
GLYMA_18G261100	GLYMA_18G261100	1.22504	1.21613	1.6226	1.34313	1.6142	0.673594	1.29012	0.838494	1.51395	1.52152	0.787475	1.47146	1.49825	1.88735	2.35194	1.13895	0.152273	0.193795	0.313725	0.172185	0.217258	0.119403	0.221922	0.136206	0.252311	0.212121	0.113821	0.160925	0.198995	0.304878	0.247191	0.162162
GLYMA_08G326800	GLYMA_08G326800	0.619533	0.817738	0.299296	0.359713	0.876179	0.665192	0.604835	0.714905	0.875538	1.04487	0.466801	0.930079	0.933495	0.79783	0.79741	0.81309	0.0893939	0.130722	0.0718954	0.0496689	0.118727	0.108742	0.110961	0.132731	0.161501	0.155468	0.0813008	0.0972157	0.120603	0.128049	0.101124	0.11583
GLYMA_16G075200	GLYMA_16G075200	0.290739	0.250597	0.123997	0.0947091	0.166083	0.150875	0.322139	0.330603	0.281989	0.180779	0.322383	0.192236	0.253616	0.219473	0.117887	0.219663	0.0492424	0.0564598	0.0522876	0.0231788	0.0324357	0.0405117	0.0744249	0.0820014	0.0636215	0.0355731	0.0406504	0.0306748	0.0442211	0.0609756	0.0224719	0.034749
GLYMA_09G228900	GLYMA_09G228900	0.123927	0.128567	0.273934	0.0818867	0.176874	0.161876	0.190015	0.154137	0.175362	0.150929	0.0837137	0.179578	0.19954	0.284	0.0813662	0.14807	0.0219697	0.0269583	0.0457516	0.013245	0.0250918	0.0319829	0.0433018	0.0361362	0.0413268	0.0250329	0.0243902	0.0217084	0.0281407	0.0487805	0.0224719	0.034749
GLYMA_19G191800	GLYMA_19G191800	0.130041	0.193655	0.143353	0.256685	0.19139	0.274226	0.237142	0.113722	0.216276	0.19297	0.139666	0.146112	0.178496	0.07887	0.275281	0.235118	0.0272727	0.0412004	0.0326797	0.0298013	0.0293758	0.0490405	0.0554804	0.0257123	0.0494834	0.0355731	0.0243902	0.0198207	0.0281407	0.0304878	0.0224719	0.046332
GLYMA_16G091200	GLYMA_16G091200	1.1058	1.59937	0.624818	0.679314	1.29833	0.889773	1.28029	1.24614	1.46719	1.33546	0.93682	1.10011	1.35262	1.08789	0.458422	0.811144	0.161364	0.245168	0.176471	0.0761589	0.165239	0.15565	0.216509	0.237665	0.242523	0.202899	0.154472	0.13025	0.186935	0.164634	0.0786517	0.138996
GLYMA_19G234400	GLYMA_19G234400	0.147787	0.210188	0.380656	0.181018	0.515354	0.504019	0.222896	0.320142	0.164284	0.44378	0.268616	0.391848	0.439623	0.514194	0.416961	0.306658	0.0265152	0.0412004	0.0980392	0.0198675	0.0973072	0.0831557	0.0487145	0.0722724	0.0369766	0.0632411	0.0325203	0.0471921	0.0703518	0.140244	0.0561798	0.0501931
GLYMA_12G052800	GLYMA_12G052800	0.353592	0.2844	0.144511	0.196458	0.360012	0.503896	0.239431	0.175048	0.238348	0.177687	0.233889	0.247802	0.34249	0.249981	0.367932	0.170062	0.0568182	0.0417091	0.0326797	0.0331126	0.0495716	0.0682303	0.052774	0.0326616	0.0418706	0.0316206	0.0325203	0.0330345	0.0492462	0.0487805	0.0337079	0.042471
GLYMA_03G206600	GLYMA_03G206600	0.492163	0.556714	0.224757	0.551166	0.459834	0.509699	0.771178	0.500888	0.783649	0.468267	0.568504	0.585604	0.497933	0.318312	0.56416	0.368657	0.0856061	0.0991862	0.0653595	0.0695364	0.0691554	0.0959488	0.146143	0.102849	0.143556	0.0737813	0.0813008	0.0665408	0.0743719	0.0853659	0.0449438	0.0772201
GLYMA_03G107300	GLYMA_03G107300	0.64951	0.652409	0.547805	0.554312	0.829486	0.882004	0.732901	0.622623	0.669432	0.616097	0.523998	0.765	0.658557	0.362824	0.252966	0.256983	0.0992424	0.121567	0.0915033	0.089404	0.113831	0.142857	0.146143	0.122307	0.134856	0.0935441	0.0813008	0.0957999	0.0964824	0.0792683	0.0449438	0.0579151
GLYMA_04G062300	GLYMA_04G062300	1.25185	1.28379	0.924456	0.864688	1.13047	0.871968	0.971787	1.12626	0.887046	0.937993	0.700583	0.904346	0.984625	0.666591	0.368292	0.578782	0.169697	0.196338	0.222222	0.102649	0.157283	0.147122	0.163735	0.202224	0.161501	0.13834	0.0813008	0.101463	0.137688	0.152439	0.0561798	0.0965251
GLYMA_10G192000	GLYMA_10G192000	0.161409	0.143601	0.0826172	0.119921	0.194499	0.101289	0.287967	0.125508	0.21187	0.236427	0.179646	0.113782	0.207918	0.186659	0.0868983	0.161435	0.025	0.0300102	0.0392157	0.0231788	0.0354957	0.0191898	0.0581867	0.0319666	0.050571	0.0421607	0.0325203	0.017933	0.0261307	0.054878	0.011236	0.030888
GLYMA_07G012500	GLYMA_07G012500	0.455324	0.493976	0.332986	0.308069	0.445202	0.556904	0.54716	0.570423	0.73368	0.496503	0.653858	0.58745	0.657859	0.46984	0.210563	0.491086	0.0712121	0.0915565	0.0849673	0.0397351	0.0709914	0.0916844	0.0960758	0.125782	0.141381	0.0711462	0.0813008	0.065597	0.0904523	0.0792683	0.0337079	0.0733591
GLYMA_14G098900	GLYMA_14G098900	0.376181	0.362098	0.516527	0.439923	0.852558	0.837778	0.487815	0.398016	0.396842	0.39952	0.424543	0.644101	0.39193	0.512904	1.26125	0.42789	0.0530303	0.0590031	0.117647	0.0463576	0.105263	0.121535	0.0784844	0.0708826	0.0723219	0.0619236	0.0731707	0.07126	0.0552764	0.097561	0.11236	0.046332
GLYMA_14G030600	GLYMA_14G030600	0.315836	0.279448	0.229678	0.331924	0.364657	0.253812	0.285208	0.206289	0.283635	0.251933	0.475808	0.413878	0.262089	0.577326	0.165838	0.451331	0.0583333	0.0549339	0.0784314	0.0496689	0.0563035	0.0469083	0.0541272	0.0500347	0.0565525	0.0434783	0.0731707	0.0453044	0.0432161	0.140244	0.0224719	0.0849421
GLYMA_16G131900	GLYMA_16G131900	0.761586	0.878458	0.728266	0.543519	0.913299	1.35677	1.31613	0.723087	0.764428	0.74368	1.05352	0.833001	0.789836	0.389742	0.534515	0.984196	0.110606	0.149034	0.150327	0.0695364	0.124847	0.200426	0.20839	0.152189	0.136487	0.119895	0.162602	0.0943841	0.117588	0.0731707	0.0898876	0.146718
GLYMA_07G045100	GLYMA_07G045100	0.162454	0.142031	0.14202	0.102107	0.242149	0.146033	0.159245	0.164872	0.224655	0.211869	0.125999	0.218681	0.17434	0.355377	0.324816	0.126608	0.0287879	0.0310275	0.0522876	0.0165563	0.0434517	0.0255864	0.0338295	0.0375261	0.040783	0.0342556	0.0162602	0.0273714	0.0311558	0.0670732	0.0561798	0.034749
GLYMA_16G145700	GLYMA_16G145700	0.602905	0.61959	0.403073	0.423316	0.818231	0.498357	0.703497	0.930126	0.677513	0.90291	0.998842	1.08935	1.05657	1.40282	0.490546	0.702565	0.0871212	0.115972	0.104575	0.0662252	0.121175	0.0916844	0.124493	0.181376	0.120174	0.137022	0.121951	0.126475	0.150754	0.243902	0.0449438	0.135135
GLYMA_09G037300	GLYMA_09G037300	0.48089	0.516402	0.320904	0.622731	0.55237	0.561746	0.483812	0.50358	0.50811	0.539932	0.560899	0.51184	0.442427	0.38681	1.11676	0.657831	0.0765152	0.093591	0.0980392	0.0960265	0.0875153	0.10661	0.101488	0.111188	0.101686	0.0909091	0.097561	0.0651251	0.0753769	0.0914634	0.11236	0.123552
GLYMA_05G118400	GLYMA_05G118400	0.488077	0.385847	0.339021	0.512737	0.678871	0.587643	0.407383	0.375288	0.459154	0.354223	0.587596	0.515719	0.437518	0.437214	0.934937	0.268674	0.0674242	0.0661241	0.117647	0.0596026	0.0930233	0.102345	0.0771313	0.0785268	0.0772159	0.0566535	0.0569106	0.0632374	0.0633166	0.121951	0.11236	0.0540541
GLYMA_03G162100	GLYMA_03G162100	0.443447	0.481325	0.209763	0.645827	0.309043	0.185698	0.479816	0.356666	0.582496	0.391534	0.343166	0.368121	0.427897	0.238579	0.400656	0.519116	0.0704545	0.0874873	0.0653595	0.0827815	0.0471236	0.0362473	0.097429	0.0792217	0.113649	0.0671937	0.0569106	0.0462482	0.0703518	0.0487805	0.0449438	0.0849421
GLYMA_08G291300	GLYMA_08G291300	0.191248	0.229689	0.251554	0.197108	0.330422	0.343489	0.195449	0.359763	0.232273	0.290093	0.10345	0.283977	0.279477	0.342172	0.17586	0.105449	0.0340909	0.0503561	0.0915033	0.0364238	0.0544676	0.0618337	0.0514208	0.0868659	0.0451332	0.0527009	0.0162602	0.0372817	0.0462312	0.0609756	0.0337079	0.019305
GLYMA_10G234200	GLYMA_10G234200	0.160872	0.103453	0.0936089	0.0963396	0.127326	0.172638	0.097421	0.135868	0.0824648	0.118034	0.0496658	0.10467	0.122297	0.0780043	0.127681	0.1185	0.0287879	0.0198372	0.0261438	0.0165563	0.0201958	0.0298507	0.0202977	0.0333565	0.0157694	0.0223979	0.0162602	0.0136857	0.0190955	0.0182927	0.011236	0.019305
GLYMA_03G051600	GLYMA_03G051600	0.47071	0.634208	0.4658	0.274616	0.457484	0.748908	0.796428	0.685521	0.95447	0.602174	0.576586	0.606186	0.532361	0.523887	0.477731	0.495829	0.069697	0.11292	0.130719	0.0463576	0.0758874	0.121535	0.14479	0.135511	0.17292	0.088274	0.105691	0.0731477	0.0824121	0.128049	0.0561798	0.0656371
GLYMA_14G190000	GLYMA_14G190000	0.337256	0.475205	0.375083	0.588299	0.401439	0.323769	0.623031	0.410954	0.484269	0.469874	0.213459	0.390404	0.470705	0.513378	0.403247	0.741858	0.0636364	0.0961343	0.117647	0.0794702	0.0746634	0.0639659	0.128552	0.095205	0.101142	0.083004	0.0406504	0.0514394	0.081407	0.121951	0.0561798	0.127413
GLYMA_07G022600	GLYMA_07G022600	0.181332	0.220212	0.149114	0.102247	0.189779	0.188869	0.171011	0.291205	0.286513	0.344554	0.0991588	0.217741	0.301734	0.153546	0.203774	0.138676	0.030303	0.0442523	0.0326797	0.013245	0.0342717	0.0362473	0.0365359	0.0597637	0.0679717	0.0632411	0.0162602	0.0273714	0.0532663	0.0304878	0.0224719	0.042471
GLYMA_09G018200	GLYMA_09G018200	0.616473	0.893444	0.496188	0.490529	0.513156	0.740061	0.682392	0.662413	0.960743	0.63553	0.649989	0.609004	0.830741	0.395543	0.423894	1.37426	0.0992424	0.143438	0.143791	0.0596026	0.0746634	0.117271	0.136671	0.126477	0.16857	0.101449	0.138211	0.0670127	0.123618	0.0853659	0.0674157	0.185328
GLYMA_06G156400	GLYMA_06G156400	1.19807	0.94619	2.37071	0.795749	1.09014	0.897479	0.682426	0.82409	0.88403	0.761496	1.8413	1.23631	1.01015	1.69982	0.940193	0.783792	0.156061	0.148525	0.431373	0.0927152	0.148103	0.127932	0.123139	0.154274	0.147363	0.0974967	0.195122	0.133082	0.147739	0.25	0.123596	0.127413
GLYMA_05G158300	GLYMA_05G158300	0.4187	0.799048	0.418815	0.485041	0.93671	1.06419	0.619218	0.53934	0.66874	1.45434	1.14595	0.672951	0.476156	0.764472	0.609824	0.616945	0.0742424	0.134283	0.130719	0.0562914	0.125459	0.136461	0.117727	0.107019	0.130506	0.180501	0.138211	0.0797546	0.0753769	0.170732	0.11236	0.108108
GLYMA_15G215100	GLYMA_15G215100	0.678075	0.861855	0.590832	0.752512	0.609241	0.519843	0.807324	0.678709	0.905809	0.93368	0.811211	0.883549	1.00383	0.532807	1.80353	0.934807	0.10303	0.141913	0.130719	0.0860927	0.0887393	0.0959488	0.154263	0.138985	0.163676	0.13307	0.121951	0.105238	0.145729	0.134146	0.157303	0.158301
GLYMA_14G072000	GLYMA_14G072000	0.310812	0.38193	0.211017	0.280715	0.338129	0.357242	0.308371	0.322513	0.362862	0.326409	0.378819	0.253653	0.254222	0.606018	0.174683	0.555776	0.0507576	0.0625636	0.0326797	0.0430464	0.0532436	0.0660981	0.0581867	0.0618485	0.0598151	0.0487484	0.0487805	0.0320906	0.0361809	0.054878	0.0449438	0.0656371
GLYMA_07G082800	GLYMA_07G082800	0.899361	0.951769	1.14447	1.61719	2.43264	2.40475	0.855073	1.04611	0.919861	1.33236	0.701482	1.63626	1.37716	0.861609	0.844343	1.3056	0.131818	0.15056	0.248366	0.15894	0.280294	0.307036	0.161028	0.18624	0.147906	0.189723	0.0894309	0.168004	0.174874	0.152439	0.101124	0.169884
GLYMA_01G162100	GLYMA_01G162100	0.337449	0.427524	0.476735	0.976201	0.552727	0.512376	0.531833	0.400899	0.496326	0.749907	0.519826	0.699076	0.43878	0.831038	0.917777	0.281559	0.0507576	0.0818922	0.124183	0.089404	0.0783354	0.102345	0.110961	0.0826963	0.0897227	0.121212	0.0731707	0.0783388	0.0643216	0.140244	0.101124	0.042471
GLYMA_08G340900	GLYMA_08G340900	0.317318	0.264379	0.367713	0.618086	0.232666	0.233936	0.248237	0.282056	0.216616	0.226416	0.196283	0.192788	0.178394	0.190595	0.34893	0.277493	0.0568182	0.0569685	0.111111	0.089404	0.0428397	0.0383795	0.0595399	0.0632384	0.0473083	0.0421607	0.0243902	0.0268995	0.0331658	0.0609756	0.0561798	0.046332
GLYMA_05G232600	GLYMA_05G232600	0.543797	0.424407	0.230377	0.261232	0.675403	0.682018	0.541177	0.651812	0.409478	0.63574	0.581883	0.798022	0.649577	0.38537	0.522481	0.445155	0.0780303	0.0808749	0.0784314	0.0463576	0.104039	0.119403	0.0933694	0.130646	0.079391	0.100132	0.0813008	0.089193	0.0944724	0.0853659	0.0561798	0.0772201
GLYMA_18G215000	GLYMA_18G215000	0.208772	0.144998	0.136782	0.2279	0.334876	0.473711	0.245076	0.220111	0.182697	0.279362	0.409751	0.22784	0.242975	0.321016	0.21251	0.180022	0.0401515	0.0315361	0.0457516	0.0264901	0.0563035	0.0852878	0.0541272	0.0493398	0.040783	0.0487484	0.0650407	0.0353941	0.0361809	0.0609756	0.0561798	0.0501931
GLYMA_06G225800	GLYMA_06G225800	0.206017	0.281591	0.123782	0.175499	0.302793	0.25445	0.391774	0.339888	0.364709	0.201605	0.113129	0.307553	0.322425	0.289582	0.348625	0.134412	0.0401515	0.0595117	0.0392157	0.0298013	0.0526316	0.0469083	0.0852503	0.0813065	0.0848287	0.0368906	0.0162602	0.0401133	0.0552764	0.0731707	0.0337079	0.03861
GLYMA_01G000600	GLYMA_01G000600	0.795282	0.719165	0.489709	0.383684	0.74001	0.733601	1.00614	0.932641	1.03847	0.893333	1.1605	0.712389	0.776822	1.03914	0.431751	0.335134	0.133333	0.122075	0.111111	0.0529801	0.111383	0.140725	0.188092	0.175817	0.194127	0.13307	0.130081	0.0924965	0.116583	0.219512	0.0449438	0.0694981
GLYMA_06G316600	GLYMA_06G316600	0.449367	0.641297	0.735842	0.525296	0.433505	0.437569	0.645598	0.632153	0.581694	0.707133	0.597361	0.546928	0.678533	0.601658	0.212521	0.570729	0.0734848	0.11292	0.156863	0.0794702	0.0758874	0.0810235	0.11908	0.135511	0.113105	0.108037	0.105691	0.0684285	0.104523	0.128049	0.0561798	0.0926641
GLYMA_16G058300	GLYMA_16G058300	0.469941	0.466515	0.238072	0.394678	0.588037	0.665325	0.412627	0.412898	0.548336	0.553195	0.540157	0.580479	0.562215	0.409116	0.824244	0.338226	0.075	0.0910478	0.0718954	0.0463576	0.0966952	0.108742	0.0920162	0.0979847	0.105492	0.0843215	0.0813008	0.0698443	0.0904523	0.0670732	0.0786517	0.0579151
GLYMA_08G152600	GLYMA_08G152600	1.84055	1.73234	1.97171	2.52662	2.07232	1.83534	1.70635	1.69378	1.68763	1.7538	0.729885	1.77479	1.74492	2.00909	1.73366	1.62389	0.252273	0.271109	0.392157	0.288079	0.27907	0.264392	0.290934	0.310632	0.283306	0.242424	0.138211	0.205286	0.233166	0.347561	0.157303	0.235521
GLYMA_11G237700	GLYMA_11G237700	1.62336	2.09549	1.1429	1.57456	1.83784	1.38521	2.04134	2.29755	3.01626	2.07944	2.33105	1.96928	1.86374	1.54	3.95532	1.81947	0.225	0.302136	0.267974	0.168874	0.241738	0.228145	0.312585	0.371091	0.437194	0.267457	0.276423	0.208589	0.251256	0.243902	0.337079	0.247104
GLYMA_09G039600	GLYMA_09G039600	0.780887	1.48209	0.510547	1.59604	0.769799	1.08298	0.899274	1.27887	1.19819	0.716197	0.777362	0.635105	0.638648	0.85288	1.76673	1.07247	0.106818	0.213632	0.0980392	0.152318	0.108935	0.151386	0.152909	0.216817	0.189233	0.104084	0.097561	0.0764512	0.0894472	0.158537	0.134831	0.146718
GLYMA_05G089500	GLYMA_05G089500	0.392154	0.389675	0.286972	0.217585	0.402212	0.451375	0.331036	0.42584	0.387079	0.341463	0.352495	0.493967	0.326596	0.723152	0.342855	0.752921	0.0643939	0.0686673	0.0784314	0.0264901	0.0703794	0.0810235	0.0595399	0.086171	0.0783034	0.057971	0.0487805	0.059462	0.0552764	0.140244	0.0449438	0.142857
GLYMA_02G275700	GLYMA_02G275700	0.250851	0.287398	0.224812	0.349902	0.319735	0.272811	0.288373	0.1997	0.240966	0.24357	0.15814	0.306231	0.19441	0.253206	0.409952	0.118492	0.0409091	0.0488301	0.0522876	0.0397351	0.0446756	0.0511727	0.0568336	0.0368311	0.0494834	0.0421607	0.0406504	0.0410571	0.0341709	0.054878	0.0561798	0.023166
GLYMA_18G199800	GLYMA_18G199800	0.613692	0.556427	0.355535	0.45744	0.527432	0.720928	0.682524	0.533388	0.707384	0.632298	0.916662	0.912616	0.701521	1.23006	1.1449	0.660893	0.100758	0.103764	0.0915033	0.0596026	0.0832313	0.110874	0.131258	0.120222	0.138662	0.106719	0.130081	0.111845	0.108543	0.231707	0.134831	0.108108
GLYMA_10G181500	GLYMA_10G181500	0.417502	0.450857	0.419061	0.2758	0.499835	0.606243	0.371253	0.543879	0.41083	0.474775	0.308722	0.954127	0.563975	0.866651	0.577088	0.725222	0.0666667	0.0930824	0.117647	0.0496689	0.0832313	0.108742	0.0798376	0.120222	0.0870038	0.0698287	0.0487805	0.113733	0.0894472	0.170732	0.0561798	0.0888031
GLYMA_02G216500	GLYMA_02G216500	0.307254	0.312613	0.392938	0.270025	0.407279	0.520005	0.33199	0.243212	0.251949	0.312006	0.413717	0.309079	0.423451	0.150339	0.315324	0.481525	0.0469697	0.0579858	0.0718954	0.0331126	0.0654835	0.0916844	0.0690122	0.0507297	0.0560087	0.055336	0.0569106	0.0410571	0.0592965	0.0487805	0.0224719	0.0656371
GLYMA_03G244500	GLYMA_03G244500	0.522496	0.771902	0.452823	0.313111	0.574675	0.340054	0.789264	0.597391	0.827837	0.772011	0.514327	0.570427	0.759444	0.449846	0.239353	0.801387	0.0856061	0.130214	0.0784314	0.0430464	0.0838433	0.0703625	0.14479	0.118833	0.151169	0.123847	0.0569106	0.0684285	0.115578	0.0853659	0.0224719	0.111969
GLYMA_U032200	GLYMA_U032200	0.804414	1.12435	0.445599	0.64539	0.840568	0.943689	0.876112	0.853333	1.07241	0.72026	0.592584	1.02563	0.732729	0.887936	1.54056	0.561196	0.129545	0.192269	0.137255	0.0761589	0.122399	0.153518	0.17862	0.170952	0.202284	0.115942	0.0731707	0.117036	0.101508	0.170732	0.168539	0.0888031
GLYMA_08G233500	GLYMA_08G233500	0.107923	0.100098	0.0983949	0.0446271	0.132203	0.0880309	0.0824361	0.0934138	0.0593971	0.064493	0.0510612	0.154245	0.129943	0.13656	0.144791	0.0720309	0.0151515	0.0167854	0.0326797	0.013245	0.0201958	0.0149254	0.0202977	0.0201529	0.0130506	0.00922266	0.0243902	0.0165172	0.0190955	0.0304878	0.0224719	0.027027
GLYMA_06G323200	GLYMA_06G323200	0.316047	0.382099	0.264641	0.321195	0.263943	0.207164	0.27662	0.412965	0.197711	0.247583	0.119482	0.351486	0.230443	0.245309	0.267517	0.35591	0.0393939	0.0722279	0.0849673	0.0430464	0.0446756	0.0447761	0.0460081	0.0868659	0.0402393	0.0368906	0.0162602	0.0434167	0.039196	0.0426829	0.0561798	0.0579151
GLYMA_09G016800	GLYMA_09G016800	0.590701	0.985118	0.75158	0.652678	0.947598	0.620162	1.05837	1.8333	1.67148	1.90486	0.730847	0.84259	0.874429	0.639171	0.551155	0.635404	0.0916667	0.175992	0.176471	0.0927152	0.139535	0.10661	0.179973	0.307158	0.280044	0.258235	0.121951	0.104766	0.130653	0.152439	0.0674157	0.119691
GLYMA_16G126200	GLYMA_16G126200	0.222067	0.143822	0.24254	0.209675	0.37689	0.341306	0.141477	0.109089	0.111042	0.167997	0.300049	0.213316	0.236018	0.202002	0.330612	0.221778	0.0363636	0.0269583	0.0392157	0.0331126	0.0569155	0.0554371	0.0324763	0.0277971	0.0222947	0.0237154	0.0487805	0.0278433	0.038191	0.054878	0.0449438	0.034749
GLYMA_04G257200	GLYMA_04G257200	0.653502	0.542982	0.367638	0.265077	0.865979	0.632552	0.871456	0.546633	0.775553	0.643372	0.553496	0.803918	0.69982	0.915541	0.661008	0.565884	0.0962121	0.107325	0.130719	0.0331126	0.129743	0.117271	0.162382	0.125087	0.13975	0.110672	0.0894309	0.0972157	0.111558	0.158537	0.0898876	0.0926641
GLYMA_02G146900	GLYMA_02G146900	1.09134	1.08789	0.639709	1.23843	0.718138	0.536173	0.560098	0.687212	0.833323	0.925539	0.363406	0.931373	1.25494	0.421067	1.04009	1.24778	0.141667	0.155646	0.183007	0.145695	0.0911873	0.08742	0.0893099	0.121612	0.13975	0.126482	0.0731707	0.105238	0.159799	0.097561	0.0898876	0.169884
GLYMA_14G002900	GLYMA_14G002900	0.616478	0.622802	0.675436	0.548064	1.35025	0.985793	0.720579	0.742978	0.536354	0.522752	0.655771	0.778233	0.742549	0.82422	0.391007	0.508211	0.0901515	0.0996948	0.143791	0.089404	0.171971	0.132196	0.124493	0.132731	0.0957042	0.0803689	0.097561	0.089193	0.103518	0.128049	0.0449438	0.0965251
GLYMA_18G237200	GLYMA_18G237200	0.535881	0.359632	0.346139	0.292115	0.478409	0.360667	0.460983	0.305016	0.387955	0.427522	0.452421	0.367128	0.507744	0.155248	0.377503	0.436034	0.0772727	0.0701933	0.104575	0.0463576	0.0771114	0.0682303	0.0852503	0.0715775	0.0804785	0.0750988	0.0650407	0.0490798	0.0663317	0.0304878	0.0674157	0.0849421
GLYMA_03G263700	GLYMA_03G263700	2.73676	2.62447	2.69011	2.71607	2.69288	2.15563	2.02313	3.07606	2.02632	2.2378	2.96111	2.41402	2.65774	3.55683	1.0305	2.00557	0.336364	0.368769	0.477124	0.274834	0.316401	0.307036	0.324763	0.439889	0.30832	0.293808	0.349593	0.23832	0.308543	0.457317	0.157303	0.254826
GLYMA_10G024500	GLYMA_10G024500	1.65298	1.30738	2.18642	1.86185	1.6468	1.70036	2.5535	1.39197	1.45194	1.39401	2.06907	1.64545	1.36672	0.739819	1.6538	1.24161	0.215909	0.213123	0.437908	0.221854	0.225826	0.251599	0.364005	0.265462	0.249592	0.193676	0.235772	0.176026	0.19799	0.182927	0.191011	0.177606
GLYMA_14G179500	GLYMA_14G179500	0.373361	0.435946	0.549561	0.259272	0.894857	0.506065	0.392473	0.74609	0.437801	0.584105	0.733936	0.469271	0.547386	0.306526	0.603727	0.290335	0.0606061	0.077823	0.111111	0.0298013	0.134639	0.0959488	0.0866035	0.14246	0.0875476	0.0922266	0.097561	0.0566305	0.0834171	0.054878	0.0674157	0.042471
GLYMA_10G280500	GLYMA_10G280500	0.402577	0.403101	0.50058	0.326736	0.444226	0.500636	0.533796	0.447258	0.450647	0.543162	0.466722	0.542306	0.44943	0.359221	0.15744	0.46488	0.0666667	0.0773143	0.143791	0.0430464	0.0679315	0.0916844	0.100135	0.0993746	0.0848287	0.0961792	0.0731707	0.0641812	0.0723618	0.0853659	0.0224719	0.0579151
GLYMA_13G210700	GLYMA_13G210700	0.87724	0.395577	0.261124	0.305871	0.60034	0.515942	0.284935	0.43896	0.351586	0.311724	0.835312	0.900374	0.365867	0.284832	0.526151	0.358608	0.0962121	0.060529	0.0588235	0.0364238	0.0728274	0.0852878	0.0608931	0.0646282	0.05764	0.0474308	0.113821	0.095328	0.0552764	0.0731707	0.0674157	0.0540541
GLYMA_19G114000	GLYMA_19G114000	0.661583	0.474265	0.455988	0.313373	0.389189	0.561748	0.402344	0.584754	0.50686	0.191917	0.491348	0.61015	0.464218	0.571985	0.303937	0.242683	0.1	0.0768057	0.0849673	0.0430464	0.0544676	0.0938166	0.0703654	0.104934	0.0880914	0.0263505	0.0569106	0.0679566	0.0613065	0.109756	0.0337079	0.046332
GLYMA_10G161600	GLYMA_10G161600	0.53533	0.617215	0.767205	0.882998	0.771495	0.737393	0.592598	0.58927	0.43092	0.317606	0.450298	0.553807	0.489896	0.373461	0.473858	1.0948	0.0772727	0.0971516	0.176471	0.0927152	0.106487	0.1258	0.117727	0.114663	0.0821098	0.0566535	0.0487805	0.0670127	0.0743719	0.0914634	0.0561798	0.181467
GLYMA_07G206500	GLYMA_07G206500	0.429186	0.45271	0.423151	0.928007	0.465573	0.269253	0.507918	0.344125	0.381869	0.488984	0.422682	0.387552	0.34775	0.391703	0.421926	0.532669	0.0666667	0.0813835	0.117647	0.10596	0.0777234	0.0575693	0.0947226	0.0826963	0.0761283	0.0777339	0.0650407	0.0438886	0.0603015	0.0792683	0.0449438	0.100386
GLYMA_10G214800	GLYMA_10G214800	0.153722	0.157472	0.134402	0.213971	0.33695	0.255713	0.192909	0.304565	0.16697	0.202399	0.426138	0.252505	0.196577	0.12367	0.282385	0.184394	0.0272727	0.0295015	0.0457516	0.0198675	0.0569155	0.0511727	0.0365359	0.0674079	0.0375204	0.0263505	0.0243902	0.0287872	0.0432161	0.0304878	0.0337079	0.034749
GLYMA_14G130400	GLYMA_14G130400	0.371896	0.323932	0.19462	0.269907	0.357551	0.379828	0.466079	0.350976	0.417886	0.311162	0.314694	0.48174	0.378135	0.147499	0.139806	0.333367	0.0507576	0.0559512	0.0784314	0.0397351	0.0660955	0.0554371	0.0960758	0.0736623	0.079391	0.0513834	0.0487805	0.0528551	0.0582915	0.0304878	0.0224719	0.0540541
GLYMA_10G001600	GLYMA_10G001600	0.601076	0.465899	0.220481	0.30464	0.528523	0.494271	0.469958	0.508154	0.632577	0.593684	0.499495	0.759718	0.61548	0.443661	0.421606	0.347681	0.0825758	0.0854527	0.0915033	0.0397351	0.0758874	0.0831557	0.0879567	0.0965949	0.109299	0.0974967	0.0813008	0.0844738	0.0884422	0.0853659	0.0674157	0.0733591
GLYMA_14G160900	GLYMA_14G160900	1.27109	1.01477	0.797778	0.556755	1.48266	1.91837	1.08794	1.30396	1.1567	1.10337	1.34215	1.61222	1.54902	1.2716	0.944136	1.30748	0.172727	0.170905	0.254902	0.0761589	0.21787	0.268657	0.20433	0.228631	0.207178	0.172596	0.186992	0.176026	0.217085	0.243902	0.11236	0.196911
GLYMA_14G015600	GLYMA_14G015600	0.424246	0.579033	0.232953	0.583715	0.577242	0.641282	0.378369	0.485535	0.473383	0.572908	0.240572	0.573485	0.506763	0.214502	0.186176	0.248791	0.0659091	0.0971516	0.0653595	0.0662252	0.0893513	0.102345	0.0771313	0.0958999	0.096248	0.0909091	0.0406504	0.065597	0.0834171	0.054878	0.0337079	0.0579151
GLYMA_06G224300	GLYMA_06G224300	0.310197	0.324337	0.163419	0.226732	0.172951	0.181457	0.355737	0.28671	0.213883	0.207583	0.262616	0.278487	0.273565	0.255442	0.130832	0.450519	0.0439394	0.0635809	0.0457516	0.0430464	0.0293758	0.0298507	0.082544	0.0660181	0.0478521	0.0382082	0.0325203	0.0353941	0.0432161	0.0731707	0.0337079	0.0656371
GLYMA_08G173900	GLYMA_08G173900	0.596433	0.590763	0.349111	0.677921	0.975348	0.983493	0.639271	0.53369	0.598964	0.511244	0.535807	0.68164	0.484854	0.485237	1.20197	0.656196	0.0939394	0.0971516	0.0849673	0.0827815	0.138923	0.159915	0.131258	0.118138	0.108755	0.0816864	0.0569106	0.0736196	0.0763819	0.0853659	0.134831	0.0926641
GLYMA_05G041000	GLYMA_05G041000	0.525701	0.625078	0.722204	0.897369	0.571854	0.557886	0.515779	0.610337	0.551656	0.545592	0.848726	0.676207	0.393634	0.260652	0.505033	0.532939	0.0757576	0.104781	0.196078	0.0993377	0.0869033	0.0938166	0.0838972	0.118833	0.104948	0.0843215	0.130081	0.0778669	0.0603015	0.0670732	0.0674157	0.0849421
GLYMA_08G193200	GLYMA_08G193200	0.297879	0.162524	0.315939	0.278842	0.370777	0.470052	0.303763	0.20738	0.171102	0.304048	0.203834	0.400768	0.218586	0.332496	0.424923	0.559494	0.0469697	0.0330621	0.0653595	0.0430464	0.0587515	0.0767591	0.0514208	0.0444753	0.0331702	0.0513834	0.0325203	0.0514394	0.039196	0.0853659	0.0449438	0.0849421
GLYMA_08G196300	GLYMA_08G196300	0.285863	0.300826	0.110708	0.21457	0.316516	0.324576	0.26482	0.347254	0.33183	0.368649	0.158888	0.338934	0.274446	0.310636	0.112023	0.10709	0.0416667	0.0600203	0.0457516	0.0364238	0.0532436	0.0639659	0.0703654	0.0750521	0.0712344	0.0592885	0.0406504	0.0457763	0.0512563	0.054878	0.011236	0.030888
GLYMA_18G066500	GLYMA_18G066500	0.302035	0.268454	0.451321	0.324413	0.330771	0.219582	0.226796	0.31098	0.292262	0.206866	0.178672	0.454887	0.271627	0.614724	0.252447	0.258467	0.0409091	0.0401831	0.111111	0.0529801	0.0526316	0.0362473	0.0351827	0.0542043	0.0581838	0.0355731	0.0325203	0.047664	0.0291457	0.097561	0.0449438	0.042471
GLYMA_04G021500	GLYMA_04G021500	0.229812	0.13979	0.237974	0.25583	0.304218	0.262948	0.11032	0.192617	0.158663	0.211819	0.379503	0.241439	0.198284	0.345145	0.287627	0.145652	0.0325758	0.0244151	0.0588235	0.0364238	0.0440636	0.0405117	0.0175913	0.0347464	0.0331702	0.0316206	0.0487805	0.0283152	0.0311558	0.054878	0.0337079	0.03861
GLYMA_20G072400	GLYMA_20G072400	0.313411	0.336815	0.506694	0.249589	0.460751	0.46454	0.510571	0.272885	0.360559	0.516831	0.271892	0.438321	0.5677	0.808948	0.235238	0.345114	0.0439394	0.0645982	0.0849673	0.0331126	0.0740514	0.0810235	0.0920162	0.0653231	0.0728657	0.0777339	0.0487805	0.0589901	0.081407	0.115854	0.0337079	0.0501931
GLYMA_13G194900	GLYMA_13G194900	0.473767	0.454358	0.249815	0.314633	0.48655	0.858951	0.356699	0.476568	0.470488	0.339316	0.601232	0.501725	0.465237	0.403788	0.300403	0.335866	0.0765152	0.0859613	0.0653595	0.0364238	0.0807834	0.119403	0.0717185	0.102154	0.0935291	0.0527009	0.0731707	0.059462	0.0653266	0.103659	0.0561798	0.0540541
GLYMA_10G257600	GLYMA_10G257600	0.250512	0.258306	0.40559	0.312757	0.273128	0.450257	0.229831	0.224159	0.232773	0.24218	0.480061	0.35703	0.235163	0.209239	0.398727	0.139666	0.0439394	0.0447609	0.124183	0.0496689	0.0471236	0.0703625	0.0487145	0.0535094	0.0451332	0.0408432	0.0650407	0.0424729	0.038191	0.0670732	0.0337079	0.030888
GLYMA_12G237700	GLYMA_12G237700	0.267387	0.192402	0.115733	0.289344	0.312733	0.393476	0.163454	0.161806	0.142992	0.263909	0.245634	0.397784	0.304158	0.239046	0.350725	0.135395	0.0462121	0.0350966	0.0326797	0.0496689	0.0532436	0.0703625	0.0257104	0.0410007	0.0277325	0.0447958	0.0243902	0.0453044	0.0462312	0.0670732	0.0449438	0.042471
GLYMA_15G140700	GLYMA_15G140700	0.520596	0.766323	0.379861	0.732948	0.882428	1.10806	0.524713	0.720765	0.633483	0.773575	0.322404	1.04048	0.948535	0.960677	0.825453	0.584458	0.0848485	0.125127	0.130719	0.0927152	0.116279	0.168443	0.104195	0.141765	0.109842	0.11726	0.0569106	0.110901	0.138693	0.170732	0.11236	0.0926641
GLYMA_08G044600	GLYMA_08G044600	0.441282	0.554166	0.209054	0.352578	0.426238	0.555252	0.436223	0.394108	0.46128	0.533207	0.71842	0.560126	0.518853	0.456223	0.638588	0.325984	0.0681818	0.0839268	0.0784314	0.0430464	0.0709914	0.0895522	0.082544	0.0806115	0.0761283	0.0816864	0.0894309	0.0556866	0.079397	0.109756	0.0898876	0.0579151
GLYMA_06G230600	GLYMA_06G230600	0.511957	0.479467	0.528287	0.295935	0.828645	0.742017	0.615782	0.531139	0.553183	0.69807	1.01654	0.792081	0.570634	0.729969	0.92902	0.386254	0.0886364	0.0956256	0.117647	0.0496689	0.127295	0.134328	0.113667	0.118138	0.115824	0.114625	0.162602	0.0995753	0.0954774	0.170732	0.0786517	0.0888031
GLYMA_14G000300	GLYMA_14G000300	0.305037	0.317334	0.721264	0.317723	0.881133	0.356031	0.296909	0.482438	0.28608	0.35967	0.315426	0.578934	0.337902	0.44444	0.42238	0.25653	0.0583333	0.0610376	0.222222	0.0496689	0.123011	0.0746269	0.0703654	0.0979847	0.0663404	0.0619236	0.0569106	0.0764512	0.0532663	0.134146	0.0674157	0.0579151
GLYMA_17G073700	GLYMA_17G073700	0.310558	0.369455	0.211274	0.265375	0.239569	0.137749	0.35265	0.372076	0.31644	0.205023	0.470896	0.297028	0.217982	0.312827	0.473037	0.290806	0.044697	0.0671414	0.0653595	0.0298013	0.0410037	0.021322	0.067659	0.0701876	0.0619902	0.0329381	0.0650407	0.0335064	0.0371859	0.0487805	0.0674157	0.046332
GLYMA_20G080900	GLYMA_20G080900	1.53283	0.763872	0.548045	0.685189	1.13107	1.12145	0.777073	1.11267	1.01596	1.20299	0.459881	1.5514	1.54063	1.45806	0.946529	0.451795	0.175758	0.113937	0.163399	0.0662252	0.148715	0.159915	0.128552	0.175817	0.153344	0.158103	0.0650407	0.165172	0.18593	0.219512	0.0898876	0.0772201
GLYMA_01G238400	GLYMA_01G238400	0.458323	0.721447	0.348371	0.494982	0.386301	0.370038	0.84575	0.711854	1.19536	0.862502	0.410579	0.654256	0.95984	0.408015	0.700873	0.354013	0.0734848	0.126653	0.0784314	0.0728477	0.0660955	0.0533049	0.154263	0.158443	0.22621	0.130435	0.0731707	0.0844738	0.146734	0.0914634	0.0786517	0.0579151
GLYMA_02G220800	GLYMA_02G220800	0.498135	0.399856	0.196486	0.341469	0.674006	0.671522	0.460337	0.363426	0.487278	0.367613	0.231218	0.55126	0.417052	0.313199	0.237986	0.457486	0.0704545	0.0717192	0.0522876	0.0463576	0.0973072	0.117271	0.0811908	0.0729673	0.0886351	0.0592885	0.0487805	0.0646531	0.0592965	0.0731707	0.0224719	0.0772201
GLYMA_18G232900	GLYMA_18G232900	0.341299	0.388722	0.319991	0.254412	0.280707	0.280817	0.381043	0.335339	0.455858	0.376839	0.244092	0.352601	0.347192	0.132921	0.311493	0.394071	0.0545455	0.0722279	0.0915033	0.0298013	0.0514076	0.0554371	0.0717185	0.0771369	0.0821098	0.0658762	0.0487805	0.0448325	0.0572864	0.0426829	0.0337079	0.0501931
GLYMA_20G027400	GLYMA_20G027400	0.855014	0.786835	0.681473	0.482285	0.825903	0.796478	0.797749	0.888523	0.930836	0.859466	0.864485	0.841327	0.788482	0.872542	1.65328	0.913433	0.125758	0.136826	0.130719	0.0562914	0.123011	0.134328	0.161028	0.180681	0.173464	0.140975	0.130081	0.100047	0.118593	0.176829	0.157303	0.138996
GLYMA_20G208800	GLYMA_20G208800	0.505896	0.477328	0.290369	0.476313	0.995149	0.781546	0.603991	0.681583	0.529039	0.559374	0.543788	0.728483	0.683888	0.722458	0.788853	0.896069	0.0780303	0.0879959	0.104575	0.0695364	0.134027	0.121535	0.11502	0.127172	0.100054	0.0895916	0.0731707	0.0915526	0.102513	0.176829	0.101124	0.142857
GLYMA_19G094500	GLYMA_19G094500	0.605334	0.477927	0.345663	0.271166	0.646085	0.890841	0.642866	0.734594	0.800647	0.778436	0.514043	0.757165	0.929227	0.554761	0.357581	0.579886	0.100758	0.093591	0.0849673	0.0430464	0.0985312	0.144989	0.125846	0.150104	0.1528	0.131752	0.0731707	0.0991034	0.139698	0.134146	0.0449438	0.0965251
GLYMA_13G073400	GLYMA_13G073400	0.384317	0.270919	0.927933	0.391141	0.598408	0.667147	0.318411	0.383469	0.299653	0.621813	0.558616	0.498854	0.46474	0.624937	0.490679	0.477762	0.0681818	0.0584944	0.20915	0.0662252	0.0911873	0.0938166	0.0622463	0.0875608	0.0603589	0.0935441	0.113821	0.0608778	0.0673367	0.103659	0.0449438	0.0656371
GLYMA_18G266400	GLYMA_18G266400	2.3381	2.68097	1.84544	2.97543	1.66778	1.15211	2.68392	3.2919	2.27419	2.31122	3.94544	1.9257	2.26176	1.79459	2.38887	2.47268	0.293939	0.378942	0.372549	0.331126	0.232558	0.189765	0.369418	0.441974	0.343121	0.304348	0.406504	0.209061	0.284422	0.329268	0.280899	0.320463
GLYMA_12G135700	GLYMA_12G135700	1.51785	1.52158	0.705575	2.13931	1.93239	1.56135	2.41613	1.25254	1.75775	1.28327	0.987957	1.8442	1.55803	1.70887	1.59289	1.40116	0.206818	0.238047	0.202614	0.225166	0.23317	0.240938	0.347767	0.219597	0.292007	0.194993	0.138211	0.20151	0.19397	0.256098	0.168539	0.204633
GLYMA_10G014700	GLYMA_10G014700	0.642218	0.460245	0.787418	0.696616	0.964794	0.736314	0.526108	0.315179	0.401171	0.35878	0.356143	0.551353	0.478084	0.54274	1.07928	0.603642	0.0840909	0.0783316	0.235294	0.0993377	0.141371	0.115139	0.105548	0.0611536	0.0777597	0.0645586	0.0569106	0.0641812	0.0713568	0.121951	0.101124	0.0772201
GLYMA_14G223100	GLYMA_14G223100	0.649237	0.574836	0.502328	0.818307	1.00346	0.725821	0.687959	0.509627	0.693071	0.721945	1.02023	0.816832	0.693643	1.09422	1.71998	0.856534	0.100758	0.113428	0.137255	0.119205	0.148103	0.130064	0.135318	0.116748	0.136487	0.113307	0.130081	0.0967437	0.0934673	0.20122	0.168539	0.131274
GLYMA_09G184900	GLYMA_09G184900	0.148177	0.093331	0.107982	0.13299	0.159315	0.185639	0.142026	0.068344	0.07729	0.141405	0.233866	0.0958865	0.0751527	0.11737	0.225158	0.0935181	0.0234848	0.0203459	0.0392157	0.0165563	0.0232558	0.0341151	0.0311231	0.0166782	0.0201196	0.0263505	0.0487805	0.0127419	0.0150754	0.0365854	0.0337079	0.019305
GLYMA_04G094500	GLYMA_04G094500	0.44163	0.579593	0.74753	0.317569	0.546785	0.550621	0.55629	0.617153	0.561339	0.764826	0.538147	0.634384	0.615252	0.481567	0.510303	1.08668	0.0689394	0.104781	0.150327	0.0463576	0.0875153	0.10661	0.105548	0.122307	0.112561	0.113307	0.0894309	0.0740916	0.0994975	0.121951	0.0674157	0.162162
GLYMA_16G220100	GLYMA_16G220100	0.22824	0.300417	0.467656	0.550374	0.297627	0.436743	0.380038	0.351362	0.251908	0.399793	0.371224	0.343388	0.305647	0.320511	0.160887	0.34162	0.0371212	0.0544252	0.137255	0.0662252	0.0581395	0.0788913	0.0663058	0.075747	0.0532898	0.0671937	0.0650407	0.0396413	0.0442211	0.0609756	0.0224719	0.0733591
GLYMA_20G006400	GLYMA_20G006400	0.445814	0.375738	0.517541	0.559415	0.401399	0.280867	0.572112	0.27107	0.376699	0.548936	0.303287	0.503235	0.430328	0.167277	0.368581	0.3266	0.0810606	0.0661241	0.130719	0.0761589	0.0477356	0.0447761	0.11908	0.0562891	0.0837412	0.0790514	0.0487805	0.0622935	0.0703518	0.0670732	0.0561798	0.0540541
GLYMA_11G039900	GLYMA_11G039900	2.65648	2.48935	1.93322	4.53156	2.42151	2.01743	6.61171	2.3506	2.88172	2.47037	3.07169	2.40501	2.24895	2.31996	4.76274	2.96501	0.312121	0.344354	0.379085	0.350993	0.280906	0.277186	0.518268	0.367616	0.406743	0.318841	0.349593	0.247758	0.288442	0.390244	0.337079	0.324324
GLYMA_08G013500	GLYMA_08G013500	0.0653571	0.0514298	0.0339866	0.0427811	0.0507123	0.100133	0.0337768	0.0539492	0.0606505	0.06421	0.11549	0.096053	0.0881276	0.0509916	0.0350357	0.0559802	0.0106061	0.00915565	0.0130719	0.00331126	0.00673195	0.0170576	0.0067659	0.0132036	0.0130506	0.0118577	0.0162602	0.00896649	0.0120603	0.0121951	0.011236	0.00772201
GLYMA_03G076900	GLYMA_03G076900	0.493014	0.483091	0.291043	0.47965	0.692636	0.778271	0.454292	0.492484	0.430519	0.57872	0.625736	0.717087	0.519576	0.574697	0.995081	0.384247	0.075	0.0900305	0.0784314	0.0695364	0.0997552	0.132196	0.0866035	0.0972898	0.0821098	0.0961792	0.105691	0.0797546	0.0753769	0.109756	0.101124	0.0656371
GLYMA_18G291100	GLYMA_18G291100	0.226283	0.247513	0.131422	0.253104	0.30747	0.368731	0.251901	0.188671	0.282269	0.372079	0.445509	0.262955	0.312515	0.21844	0.13035	0.215017	0.0416667	0.0498474	0.0261438	0.0298013	0.0458996	0.0597015	0.0500677	0.0410007	0.0554649	0.0606061	0.0813008	0.0339783	0.0502513	0.0304878	0.0224719	0.034749
GLYMA_20G236700	GLYMA_20G236700	0.201998	0.387447	0.578109	0.658552	0.299189	0.237161	0.275548	0.347528	0.245138	0.376759	0.690269	0.394791	0.285626	0.556934	0.46478	0.301036	0.0325758	0.0696846	0.156863	0.0794702	0.0532436	0.0447761	0.0487145	0.075747	0.0478521	0.0671937	0.0894309	0.0471921	0.0472362	0.146341	0.0337079	0.0579151
GLYMA_11G129000	GLYMA_11G129000	0.776801	0.674789	0.480039	0.525566	0.433094	0.424585	0.703779	0.566598	0.550529	0.40011	0.390804	0.492712	0.522329	0.416548	1.25274	0.366601	0.122727	0.126144	0.117647	0.0860927	0.0630355	0.0703625	0.138024	0.116748	0.116368	0.0632411	0.0731707	0.0585182	0.0753769	0.0731707	0.11236	0.0617761
GLYMA_02G216600	GLYMA_02G216600	2.72965	2.80223	1.31629	1.86105	3.74211	3.35699	1.9667	3.20734	1.42141	2.33877	1.41251	2.87417	2.59378	2.73219	1.89202	1.0952	0.263636	0.301628	0.196078	0.178808	0.301714	0.289979	0.247632	0.378735	0.203371	0.27141	0.186992	0.223218	0.246231	0.268293	0.179775	0.173745
GLYMA_06G040600	GLYMA_06G040600	0.170902	0.196131	0.198171	0.160947	0.255208	0.44411	0.130015	0.174407	0.132325	0.189923	0.342171	0.236248	0.170261	0.173146	0.233312	0.277436	0.025	0.0361139	0.0784314	0.0231788	0.0391677	0.0703625	0.0351827	0.0326616	0.0266449	0.0316206	0.0487805	0.0283152	0.0251256	0.0426829	0.0337079	0.03861
GLYMA_09G104200	GLYMA_09G104200	2.55283	2.42722	1.40024	1.48489	1.49767	1.49559	3.23906	2.0721	2.77191	3.31815	1.70277	3.37813	4.78223	2.30721	2.98829	3.37987	0.274242	0.325534	0.248366	0.149007	0.182375	0.211087	0.372124	0.306463	0.37031	0.354414	0.243902	0.268995	0.415075	0.304878	0.280899	0.351351
GLYMA_12G005900	GLYMA_12G005900	0.648549	0.646547	0.289765	0.69412	0.695741	0.515144	0.661194	0.709584	0.801528	0.825823	0.618443	0.849357	0.947502	0.601998	0.2775	0.839025	0.0893939	0.109868	0.0849673	0.0827815	0.107711	0.08742	0.128552	0.14524	0.144644	0.1278	0.0813008	0.101463	0.139698	0.121951	0.0449438	0.142857
GLYMA_02G176900	GLYMA_02G176900	0.291462	0.281223	0.439902	0.415279	0.227598	0.323212	0.259584	0.223528	0.230586	0.235067	0.30005	0.287966	0.143277	0.489181	0.286409	0.288777	0.0477273	0.0534079	0.130719	0.0596026	0.0428397	0.0618337	0.0541272	0.0597637	0.0467645	0.0395257	0.0650407	0.0349221	0.0251256	0.0792683	0.0337079	0.0540541
GLYMA_07G058600	GLYMA_07G058600	0.224515	0.282088	0.152053	0.438765	0.357144	0.305941	0.287761	0.216122	0.212477	0.400525	0.367013	0.388868	0.432438	0.20989	0.518934	0.211228	0.0378788	0.051882	0.0653595	0.0364238	0.0550796	0.0511727	0.0473613	0.0486449	0.045677	0.057971	0.0487805	0.047664	0.0582915	0.0304878	0.0786517	0.046332
GLYMA_04G254100	GLYMA_04G254100	0.27668	0.266102	0.333644	0.417948	0.259332	0.206805	0.156913	0.202239	0.1529	0.234349	0.210428	0.236074	0.122483	0.137031	0.274151	0.194315	0.0439394	0.0422177	0.0849673	0.0496689	0.0410037	0.0383795	0.0324763	0.0416956	0.02882	0.0368906	0.0325203	0.0283152	0.0180905	0.0243902	0.0449438	0.030888
GLYMA_06G139600	GLYMA_06G139600	0.0675046	0.0878955	0.0844803	0.0792831	0.0880995	0.0767725	0.0452854	0.113811	0.112103	0.130667	0.0910035	0.151727	0.102328	0.085613	0.121865	0.154445	0.0128788	0.017294	0.0196078	0.00993377	0.0140759	0.0149254	0.0135318	0.0257123	0.021751	0.0263505	0.0162602	0.0212364	0.0211055	0.0182927	0.011236	0.023166
GLYMA_04G033600	GLYMA_04G033600	0.155999	0.17781	0.126362	0.272726	0.291711	0.241323	0.244897	0.191366	0.20267	0.186467	0.332407	0.243141	0.210417	0.198018	0.143079	0.430881	0.025	0.0325534	0.0326797	0.0331126	0.0422277	0.0426439	0.052774	0.0389159	0.040783	0.0289855	0.0569106	0.0302029	0.0371859	0.0426829	0.0337079	0.0772201
GLYMA_01G086200	GLYMA_01G086200	0.510173	0.540402	0.340943	0.312268	0.31179	0.313093	0.513565	0.528525	0.571475	0.460659	0.255091	0.370052	0.45308	0.30487	0.167701	0.340916	0.0787879	0.0991862	0.111111	0.0397351	0.0465116	0.0575693	0.101488	0.123002	0.11093	0.0750988	0.0569106	0.0481359	0.0703518	0.0670732	0.011236	0.0540541
GLYMA_07G132300	GLYMA_07G132300	0.620544	0.811031	0.436728	0.634977	0.697123	0.723727	0.814524	0.740774	0.925834	0.708348	0.385921	0.691239	0.889591	0.682593	1.31495	0.835736	0.0939394	0.143438	0.0980392	0.0794702	0.100367	0.110874	0.14479	0.149409	0.160957	0.105402	0.0731707	0.0868334	0.135678	0.115854	0.179775	0.166023
GLYMA_05G001900	GLYMA_05G001900	2.75209	2.65297	1.2336	1.91364	3.89018	4.20291	2.60556	2.80338	3.53268	3.62108	2.56026	4.16293	3.81245	2.6008	3.52636	2.79392	0.326515	0.355544	0.267974	0.225166	0.395961	0.473348	0.388363	0.394024	0.44807	0.417655	0.308943	0.359132	0.424121	0.378049	0.359551	0.370656
GLYMA_02G288800	GLYMA_02G288800	0.298946	0.263586	0.211693	0.113606	0.376939	0.301701	0.243095	0.272554	0.307943	0.274803	0.128919	0.386899	0.380152	0.204888	0.270554	0.29355	0.0454545	0.0457782	0.0784314	0.0198675	0.0556916	0.0575693	0.0473613	0.0555942	0.0538336	0.0447958	0.0243902	0.0410571	0.0512563	0.0365854	0.0337079	0.03861
GLYMA_17G255800	GLYMA_17G255800	1.49327	1.47665	1.64862	0.977744	0.484225	0.514128	0.684426	1.32834	0.649688	0.80356	0.889878	0.631273	0.669565	1.2412	1.03393	0.628713	0.181818	0.219227	0.281046	0.109272	0.0679315	0.0788913	0.117727	0.217512	0.111474	0.0935441	0.121951	0.0703162	0.0904523	0.25	0.134831	0.0926641
GLYMA_15G038600	GLYMA_15G038600	0.388592	0.374715	0.325626	0.174361	0.207051	0.46009	0.43428	0.402971	0.520689	0.426431	0.355004	0.317303	0.49282	0.152948	0.18603	0.166237	0.0598485	0.0712106	0.104575	0.0264901	0.0348837	0.0788913	0.0811908	0.0785268	0.103317	0.0685112	0.0406504	0.0377537	0.0703518	0.0487805	0.0224719	0.030888
GLYMA_20G085800	GLYMA_20G085800	0.474487	0.423437	0.597104	0.380471	0.923736	0.716526	0.506507	0.521613	0.463604	0.281761	0.6759	0.482947	0.335828	0.958892	0.673658	0.632434	0.0719697	0.0717192	0.137255	0.0496689	0.129131	0.1258	0.0987821	0.108409	0.0815661	0.0527009	0.0731707	0.059462	0.0522613	0.158537	0.0898876	0.0810811
GLYMA_12G157600	GLYMA_12G157600	0.158838	0.109845	0.107194	0.118303	0.234721	0.187691	0.186173	0.17324	0.168888	0.220976	0.364769	0.272701	0.212859	0.134083	0.127681	0.264663	0.0257576	0.0254323	0.0392157	0.0165563	0.0373317	0.0319829	0.0392422	0.0375261	0.0364328	0.0368906	0.0406504	0.0316187	0.0301508	0.0426829	0.011236	0.046332
GLYMA_09G228100	GLYMA_09G228100	1.13175	0.927111	0.390688	0.615249	0.91261	1.06036	0.933222	1.1157	0.934694	1.17908	1.32924	0.973191	0.485361	0.752828	1.06758	1.04121	0.150758	0.149542	0.104575	0.0794702	0.126071	0.151386	0.14885	0.198054	0.160413	0.167325	0.195122	0.104766	0.081407	0.170732	0.123596	0.142857
GLYMA_U007700	GLYMA_U007700	1.11693	1.36272	0.695925	1.55206	0.66333	0.456311	1.23318	0.911728	1.34839	0.792361	0.821184	0.966592	0.820521	0.952925	0.783396	1.25346	0.167424	0.21414	0.183007	0.168874	0.105263	0.0959488	0.209743	0.178596	0.224579	0.11726	0.105691	0.109486	0.129648	0.158537	0.123596	0.196911
GLYMA_04G146900	GLYMA_04G146900	1.4745	1.25474	0.559718	0.720054	1.77349	1.90331	1.5704	1.63177	1.44727	1.85801	1.73883	1.72335	1.48838	1.4185	1.14226	1.21198	0.208333	0.197864	0.124183	0.0860927	0.22705	0.287846	0.247632	0.276581	0.235454	0.243742	0.243902	0.192072	0.20402	0.237805	0.123596	0.166023
GLYMA_02G149200	GLYMA_02G149200	1.67329	1.11894	1.42468	0.641082	0.884522	1.01384	1.10274	0.837533	1.00723	0.878545	0.979534	0.9245	0.854777	0.583995	0.492248	0.903633	0.220455	0.183113	0.30719	0.0794702	0.132191	0.164179	0.193505	0.164698	0.178902	0.126482	0.146341	0.109958	0.126633	0.146341	0.0786517	0.135135
GLYMA_17G129200	GLYMA_17G129200	0.690798	0.547637	0.615423	0.484484	0.967211	0.843227	0.667168	0.639748	0.67877	1.02129	0.64521	0.850451	0.909003	0.806812	0.300463	0.559799	0.0977273	0.0940997	0.137255	0.0728477	0.144431	0.127932	0.131258	0.125782	0.122893	0.146245	0.0894309	0.100047	0.136683	0.189024	0.0449438	0.0965251
GLYMA_04G001200	GLYMA_04G001200	1.14347	1.24596	1.11563	1.41568	0.766455	0.851067	1.32158	1.10766	1.288	0.878834	0.416567	1.04652	1.10746	0.677802	0.50831	1.03718	0.170455	0.203967	0.287582	0.15894	0.118727	0.115139	0.211096	0.223072	0.224579	0.140975	0.0813008	0.110429	0.152764	0.115854	0.0449438	0.150579
GLYMA_18G211200	GLYMA_18G211200	0.17116	0.142806	0.13076	0.171898	0.383201	0.195312	0.145406	0.193354	0.160373	0.237508	0.120569	0.248089	0.275392	0.11277	0.379534	0.182873	0.0280303	0.0300102	0.0261438	0.0231788	0.0520196	0.0341151	0.037889	0.0437804	0.0348015	0.0421607	0.0243902	0.0325625	0.038191	0.0182927	0.0449438	0.046332
GLYMA_07G150700	GLYMA_07G150700	0.259665	0.29426	0.242104	0.418343	0.200608	0.182512	0.255608	0.195345	0.188563	0.248402	0.201469	0.17935	0.219375	0.14131	0.123116	0.410069	0.0378788	0.0549339	0.0653595	0.0496689	0.0312118	0.0341151	0.0541272	0.0493398	0.0467645	0.0434783	0.0243902	0.0259556	0.0361809	0.0426829	0.0224719	0.0656371
GLYMA_07G187500	GLYMA_07G187500	0.955609	0.887803	0.892667	1.15628	1.10308	0.817994	1.08274	0.904485	0.795555	0.870242	0.994784	0.83048	0.78266	0.696751	0.34029	1.05543	0.136364	0.157172	0.196078	0.149007	0.149939	0.134328	0.17456	0.178596	0.143556	0.137022	0.138211	0.0976876	0.117588	0.146341	0.0449438	0.142857
GLYMA_17G110900	GLYMA_17G110900	0.265062	0.252695	0.233299	0.38613	0.227253	0.113644	0.371037	0.248216	0.297903	0.303796	0.154678	0.221009	0.218842	0.212602	0.142014	0.351221	0.0507576	0.0544252	0.0980392	0.0529801	0.0489596	0.0277186	0.0852503	0.066713	0.0706906	0.0566535	0.0406504	0.035866	0.0432161	0.0853659	0.0224719	0.0617761
GLYMA_07G017700	GLYMA_07G017700	0.30345	0.459858	0.253937	0.390657	0.407654	0.452718	0.388637	0.434751	0.427588	0.410529	0.788399	0.420215	0.351594	0.358769	0.481215	0.232097	0.0469697	0.0737538	0.0784314	0.0463576	0.0697674	0.0703625	0.0663058	0.0889507	0.0772159	0.0606061	0.0894309	0.0500236	0.0603015	0.0731707	0.0449438	0.0501931
GLYMA_02G165500	GLYMA_02G165500	0.443544	0.338178	0.222297	0.299757	0.24127	0.212046	0.404199	0.311006	0.317032	0.379502	0.720261	0.314805	0.33903	0.450109	0.405125	0.332422	0.0704545	0.0681587	0.0784314	0.0364238	0.0379437	0.0405117	0.0757781	0.0778318	0.0647091	0.0619236	0.097561	0.0434167	0.0562814	0.121951	0.0561798	0.0579151
GLYMA_10G119200	GLYMA_10G119200	1.60911	2.50934	1.76933	2.86342	0.84317	0.934144	2.27099	1.63151	1.52887	1.2021	1.42013	1.36939	1.12362	2.05664	2.31723	1.61557	0.231061	0.344354	0.320261	0.291391	0.130967	0.144989	0.330176	0.28214	0.258836	0.183136	0.211382	0.151958	0.158794	0.317073	0.213483	0.220077
GLYMA_17G179200	GLYMA_17G179200	1.04739	1.20441	0.834185	0.617801	0.354735	0.389669	0.45546	0.809437	0.579609	0.448081	0.463959	0.387526	0.373174	0.451869	0.402288	0.786529	0.151515	0.192777	0.189542	0.0761589	0.0489596	0.0724947	0.0757781	0.148019	0.108755	0.0698287	0.0569106	0.0457763	0.0542714	0.0914634	0.0449438	0.0926641
GLYMA_14G001800	GLYMA_14G001800	0.0982847	0.161439	0.193858	0.110237	0.203182	0.21943	0.198523	0.125238	0.169474	0.136904	0.0806685	0.163745	0.186109	0.273774	0.117654	0.191622	0.0166667	0.0305188	0.0261438	0.013245	0.0269278	0.0277186	0.0351827	0.0277971	0.0353453	0.0237154	0.0162602	0.0188768	0.0291457	0.0365854	0.011236	0.030888
GLYMA_10G082300	GLYMA_10G082300	0.659772	0.465129	0.300381	0.423862	0.521622	0.505242	0.787268	0.433379	0.433334	0.363301	0.4166	0.691356	0.426644	0.232074	0.487439	0.413226	0.1	0.0803662	0.0849673	0.0529801	0.0795594	0.100213	0.151556	0.085476	0.0810223	0.0566535	0.0731707	0.0740916	0.0643216	0.0792683	0.0561798	0.0810811
GLYMA_08G175500	GLYMA_08G175500	0.522748	0.561202	0.74936	0.543187	0.807023	0.653646	0.689746	0.517701	0.465997	0.641624	1.12114	0.665018	0.628348	0.930275	0.689649	0.330568	0.0818182	0.102747	0.196078	0.0761589	0.124235	0.121535	0.124493	0.111883	0.10658	0.104084	0.130081	0.0821142	0.100503	0.170732	0.0786517	0.0810811
GLYMA_09G198500	GLYMA_09G198500	0.33822	0.304999	0.121927	0.396191	0.379996	0.274331	0.241561	0.266259	0.235021	0.413468	0.159381	0.240166	0.181955	0.13203	0.23747	0.227985	0.0477273	0.0590031	0.0326797	0.0397351	0.0618115	0.0554371	0.0514208	0.0555942	0.0511147	0.0566535	0.0325203	0.0335064	0.0341709	0.0426829	0.0337079	0.0540541
GLYMA_11G200000	GLYMA_11G200000	0.379516	0.153521	0.292362	0.146494	0.388252	0.163329	0.272994	0.231478	0.23962	0.211516	0.496747	0.173055	0.225423	0.318494	0.485367	0.347729	0.0530303	0.0340793	0.0718954	0.0264901	0.0593635	0.0341151	0.0703654	0.0458652	0.0462208	0.0408432	0.0569106	0.0231241	0.0331658	0.0487805	0.0449438	0.03861
GLYMA_06G013800	GLYMA_06G013800	0.188511	0.192729	0.410855	0.232183	0.411818	0.370156	0.207996	0.245845	0.133849	0.45352	0.440632	0.320742	0.218188	0.216202	0.423022	0.168423	0.0325758	0.0330621	0.0980392	0.0463576	0.0648715	0.0682303	0.0365359	0.0528145	0.0261011	0.0658762	0.0731707	0.0401133	0.0321608	0.0487805	0.0449438	0.042471
GLYMA_19G241800	GLYMA_19G241800	0.401009	0.46025	0.472357	0.321543	0.492692	0.586897	0.443321	0.379395	0.385932	0.292954	0.921505	0.410137	0.46109	0.362557	0.290665	0.271967	0.0590909	0.0752798	0.0915033	0.0562914	0.0703794	0.0767591	0.0784844	0.0778318	0.0723219	0.0513834	0.105691	0.0490798	0.0673367	0.0731707	0.0224719	0.042471
GLYMA_10G047800	GLYMA_10G047800	0.278356	0.320708	0.555609	0.355303	0.634651	0.302078	0.392317	0.62329	0.436385	0.443001	0.347874	0.565605	0.571678	0.428858	0.187348	0.380322	0.044697	0.0574771	0.137255	0.0463576	0.0991432	0.0703625	0.0798376	0.125782	0.0821098	0.0698287	0.0487805	0.065597	0.0824121	0.097561	0.0337079	0.0501931
GLYMA_07G168100	GLYMA_07G168100	0.529527	0.504416	0.230766	0.478908	0.439298	0.342446	0.550882	0.536072	0.689886	0.627123	0.364754	0.639036	0.511667	0.388502	0.781162	0.552553	0.0840909	0.0996948	0.0653595	0.0662252	0.0709914	0.0575693	0.109608	0.108409	0.129962	0.0988142	0.0650407	0.0764512	0.0894472	0.0853659	0.101124	0.111969
GLYMA_20G224500	GLYMA_20G224500	0.142424	0.183916	0.217267	0.111948	0.127655	0.134857	0.205911	0.213166	0.166047	0.172799	0.237949	0.141	0.145472	0.0703054	0.0832632	0.08764	0.0204545	0.0406918	0.0588235	0.0231788	0.0195838	0.021322	0.0338295	0.0486449	0.0375204	0.0250329	0.0406504	0.017933	0.0231156	0.0243902	0.0224719	0.019305
GLYMA_08G072100	GLYMA_08G072100	1.33699	0.961964	1.16963	1.09749	0.812055	0.915455	0.96714	0.744615	0.957922	0.713442	1.02593	0.751353	0.782577	0.820894	0.395051	0.697753	0.191667	0.157172	0.267974	0.142384	0.116279	0.140725	0.171854	0.151494	0.179445	0.105402	0.138211	0.0896649	0.112563	0.164634	0.0674157	0.119691
GLYMA_12G219800	GLYMA_12G219800	0.254303	0.240383	0.440482	0.234816	0.459925	0.500647	0.159248	0.382116	0.16335	0.285113	0.187192	0.447067	0.345894	0.508889	0.538876	0.401408	0.0454545	0.0452696	0.124183	0.0331126	0.0716034	0.0916844	0.0405954	0.0833912	0.0386079	0.0474308	0.0325203	0.0547428	0.0522613	0.103659	0.0337079	0.0656371
GLYMA_13G244300	GLYMA_13G244300	0.853433	0.931979	0.885807	1.04615	0.61726	0.909302	0.719203	0.862764	0.483042	0.7804	0.60159	0.809863	0.788717	1.6344	0.808857	0.622538	0.131818	0.140895	0.228758	0.125828	0.0899633	0.121535	0.127199	0.14524	0.0978793	0.106719	0.0894309	0.0873053	0.109548	0.22561	0.11236	0.0926641
GLYMA_11G109900	GLYMA_11G109900	0.42662	0.406837	0.440003	0.432386	0.696146	0.85243	0.486293	0.564299	0.488548	0.605349	1.14027	0.602146	0.634066	0.637202	0.996307	0.337128	0.0734848	0.0803662	0.0980392	0.0629139	0.102203	0.121535	0.0730717	0.109104	0.0929853	0.0935441	0.162602	0.0740916	0.0904523	0.152439	0.101124	0.0733591
GLYMA_16G079100	GLYMA_16G079100	0.294691	0.22515	0.237028	0.223439	0.215269	0.257239	0.3489	0.265014	0.328545	0.280698	0.233621	0.356796	0.253353	0.349103	0.728087	0.346462	0.0492424	0.0427263	0.0392157	0.0364238	0.0330477	0.0447761	0.0608931	0.0521195	0.0630778	0.0447958	0.0487805	0.0438886	0.040201	0.0609756	0.0786517	0.0501931
GLYMA_20G151300	GLYMA_20G151300	0.152933	0.141276	0.130823	0.234035	0.220089	0.408579	0.120832	0.148242	0.138331	0.159187	0.215812	0.217594	0.148563	0.16243	0.271379	0.171437	0.0227273	0.0239064	0.0326797	0.0264901	0.0287638	0.0597015	0.0257104	0.0312717	0.02882	0.0210804	0.0243902	0.0254837	0.0241206	0.0365854	0.0337079	0.030888
GLYMA_14G065600	GLYMA_14G065600	0.768472	0.424048	0.990553	0.915297	0.791755	0.765075	0.365561	0.595177	0.410911	0.751798	0.417121	0.725081	0.449408	0.394018	0.293025	0.579842	0.114394	0.0793489	0.183007	0.119205	0.119339	0.1258	0.0771313	0.118833	0.0723219	0.0974967	0.0731707	0.0840019	0.0743719	0.0853659	0.0561798	0.0849421
GLYMA_18G058700	GLYMA_18G058700	0.49695	0.507974	0.493987	0.278928	0.776177	0.634559	0.656801	0.631395	0.68764	0.772715	0.516179	0.725368	0.603912	0.942774	0.584745	0.530344	0.0795455	0.0900305	0.104575	0.0596026	0.119339	0.10661	0.135318	0.128562	0.131593	0.1278	0.0731707	0.0934403	0.0974874	0.176829	0.0786517	0.0926641
GLYMA_10G023700	GLYMA_10G023700	0.446946	0.458924	0.374303	0.950256	0.515042	0.598656	0.568866	0.427833	0.553972	0.337671	0.630684	0.355196	0.557856	0.43093	0.281192	0.506602	0.0719697	0.0854527	0.111111	0.122517	0.0777234	0.10661	0.125846	0.0882557	0.11093	0.0645586	0.105691	0.041529	0.0834171	0.097561	0.0224719	0.0849421
GLYMA_01G234200	GLYMA_01G234200	0.12473	0.0872937	0.102186	0.0569589	0.189525	0.135483	0.099849	0.0991659	0.0842603	0.0560856	0.116924	0.104654	0.096697	0.161893	0.0993453	0.128958	0.0181818	0.0193286	0.0457516	0.00993377	0.0324357	0.0234542	0.0230041	0.0250174	0.0190321	0.0118577	0.0162602	0.0146295	0.0160804	0.0609756	0.011236	0.030888
GLYMA_12G203300	GLYMA_12G203300	0.179823	0.196467	0.0921155	0.224456	0.19824	0.203965	0.311266	0.20051	0.178123	0.311168	0.294808	0.165355	0.185555	0.0979061	0.193924	0.113132	0.0287879	0.0361139	0.0392157	0.0397351	0.0299878	0.0426439	0.0663058	0.0389159	0.0413268	0.0500659	0.0325203	0.0212364	0.0341709	0.0243902	0.0224719	0.023166
GLYMA_08G101200	GLYMA_08G101200	0.497022	0.446077	0.434142	0.997791	0.422329	0.306146	0.415742	0.332905	0.380517	0.370059	0.524384	0.402679	0.384069	0.689209	1.03423	0.454415	0.0727273	0.0813835	0.137255	0.125828	0.0648715	0.0597015	0.0879567	0.0701876	0.0750408	0.0500659	0.0650407	0.053799	0.0482412	0.134146	0.134831	0.0733591
GLYMA_07G125200	GLYMA_07G125200	0.410617	0.34722	0.293219	0.397285	0.319701	0.24888	0.394571	0.324363	0.310565	0.385752	0.713486	0.558906	0.547411	0.291142	0.215511	0.727795	0.0666667	0.0630722	0.0849673	0.0596026	0.0563035	0.0490405	0.0960758	0.0646282	0.0652529	0.0711462	0.0894309	0.0641812	0.080402	0.054878	0.0337079	0.0733591
GLYMA_06G021600	GLYMA_06G021600	0.632992	0.527903	0.245626	0.301637	0.613727	0.755433	0.57431	0.425679	0.506102	0.445254	0.393835	0.690878	0.566444	0.676652	0.829423	0.470732	0.0901515	0.0905392	0.0718954	0.0562914	0.0942472	0.123667	0.102842	0.0938151	0.0859163	0.0724638	0.0813008	0.0769231	0.0844221	0.121951	0.101124	0.0772201
GLYMA_17G095800	GLYMA_17G095800	2.07577	2.18275	0.87867	1.44149	2.38048	2.31999	2.16944	2.37679	2.96661	2.25152	1.7411	2.81876	2.52138	2.16017	1.9831	1.86967	0.274242	0.310275	0.202614	0.155629	0.295594	0.302772	0.320704	0.355108	0.405111	0.28195	0.235772	0.278905	0.304523	0.347561	0.224719	0.258687
GLYMA_01G015000	GLYMA_01G015000	2.53018	2.8309	1.43488	2.54256	1.84726	1.21488	2.7684	2.16658	4.10093	2.90683	2.20734	2.45691	2.89623	2.52247	2.192	2.29426	0.302273	0.365209	0.287582	0.261589	0.21175	0.191898	0.361299	0.323836	0.502991	0.339921	0.235772	0.243039	0.327638	0.365854	0.235955	0.297297
GLYMA_12G210400	GLYMA_12G210400	0.765177	0.965518	0.400511	0.69134	0.671597	0.660221	0.763347	0.792873	0.872313	0.800118	0.532064	0.769955	0.666439	0.286066	0.343781	0.721071	0.115152	0.159715	0.0849673	0.0860927	0.0924113	0.115139	0.147497	0.154969	0.161501	0.129117	0.0731707	0.0882492	0.0954774	0.0731707	0.0561798	0.104247
GLYMA_04G045400	GLYMA_04G045400	0.604647	1.05304	0.762614	0.448382	1.09199	0.922694	0.537492	0.710849	0.587957	0.612927	0.323847	0.78624	0.895694	0.69773	0.948141	0.457908	0.0901515	0.173449	0.176471	0.0596026	0.160955	0.159915	0.109608	0.140375	0.107123	0.088274	0.0650407	0.0943841	0.120603	0.115854	0.0898876	0.0733591
GLYMA_05G147300	GLYMA_05G147300	0.797915	0.683026	0.878622	0.802393	0.619727	0.417542	0.645446	0.654817	0.637617	0.678212	0.654051	0.62929	0.612705	0.688235	0.30387	1.02457	0.106818	0.120549	0.20915	0.089404	0.0966952	0.0703625	0.127199	0.135511	0.120718	0.105402	0.105691	0.0759792	0.0874372	0.109756	0.0449438	0.150579
GLYMA_11G153900	GLYMA_11G153900	0.36711	0.476172	0.207466	0.699484	0.474316	0.317276	0.59261	0.531664	0.555413	0.645068	0.47973	0.443429	0.605167	0.371629	0.388531	0.602269	0.0651515	0.0961343	0.0653595	0.0827815	0.0630355	0.0597015	0.110961	0.110493	0.11093	0.106719	0.0650407	0.053327	0.0894472	0.0914634	0.0449438	0.108108
[truncated: 54,583 more rows]

## Sheet: sNuc nodule
Gene ID	Gene Name	Normalized average expression											%age of cells in the cluster expressing the gene
[truncated: 55,898 more rows]

## Sheet: sNuc root cell type-specific
Gene ID	Gene Name	Normalized average expression																%age of cells in the cluster expressing the gene
[truncated: 425 more rows]

[truncated: 2 more sheets: sNuc nodule cell type-specific, sNuc root vs nod specific genes]
