# Supplementary material for: Single-cell resolution transcriptome atlases of soybean root organs reveal new regulatory programs controlling the nodulation process
Source: Research Square preprint supplement (doi:10.21203/rs.3.rs-2833917/v1), 2023-05-18
Supplement: Supplementary file 20 [file 9143b579c46c447bc27e2287.xlsx]

## Sheet: Table.S5
Table.S5. List of soybean amd medicago genes used to develop ridge plots in Figure 3
	Medicago truncatula orthologous genes	Glycine max orthologous genes
	Leghomoglobin genes
	MtLb3	Glyma.10G199100
	MtLBb9	Glyma.10G199000
	MtLb2	Glyma.20G191200
	MtLb7	Glyma.10G198900
	MtLb8
Generic gene name	CCS52A
MtCCS52a	MtCCS52a	Glyma.17G133000, Glyma.01G214500, Glyma.05G051100
MtCCS52b	MtCCS52b
Generic gene name	Host range restriction
GmRj2/GmRFG1	MtrunA17Chr6g0482141, MtrunA17Chr6g0472561	Glyma.16G212300
GmRj4	MtrunA17Chr8g0357311	Glyma.01G165800
	MtNSF1
	MtNSF2
Generic gene name	Nodule defense
MtDNF2	MtDNF2	Glyma.02G102700
LjERF1	MtERF1	Glyma.20G203700
MtNAD1	MtNAD1	Glyma.02G096200
MtRSD	MtRSD	Glyma.07G135800
GmSACPD-C	MtrunA17Chr1g0159321	Glyma.14G121400
MtSymCRK	MtSymCRK	Glyma.02G311200
Generic gene name	Bacterial maturation
MtDME	MtDME	Glyma.20G188300
MtDNF1	MtDNF1	Glyma.10G156000
LjFEN1	MtNCR211,MtNCR167	Glyma.19g120400, Glyma.19g120600, Glyma.03g005700
LjIGN1	MtrunA17Chr7g0263471	Glyma.20G241200, Glyma.10G291900
LjGLB1	MtPhytogb1.1	Glyma.11G121800
LjSEN1	MtVTL-SEN1	Glyma.08G076300
